# Supplementary material for: An optimal Fe–C coordination ensemble for hydrocarbon chain growth: a full Fischer–Tropsch synthesis mechanism from machine learning
Source: PubMed Central journal article supplement — Chem Sci. 2023 Aug 11;14(35):9461–75. doi: 10.1039/d3sc02054a (PMC10498498; doi:10.1039/d3sc02054a), 2023-08-11
Supplement: SC-014-D3SC02054A-s001.pdf [file SC-014-D3SC02054A-s001.pdf]

# Supporting information

## An optimal Fe-C coordination ensemble for hydrocarbon chain growth: a full Fischer-Tropsch synthesis mechanism from machine learning

Qian-Yu Liu<sup>1</sup>, Dongxiao Chen<sup>1</sup>, Cheng Shang<sup>1\*</sup>, Zhi-Pan Liu<sup>1,2,3\*</sup>

<sup>1</sup>Collaborative Innovation Center of Chemistry for Energy Material, Shanghai Key Laboratory of Molecular Catalysis and Innovative Materials, Key Laboratory of Computational Physical Science, Department of Chemistry, Fudan University, Shanghai 200433, China

<sup>2</sup>Key Laboratory of Synthetic and Self-Assembly Chemistry for Organic Functional Molecules, Shanghai Institute of Organic Chemistry, Chinese Academy of Sciences, Shanghai 200032, China

<sup>3</sup> Shanghai Qi Zhi Institution, Shanghai 200030, China

### Contents

|                                                                                                    |    |
|----------------------------------------------------------------------------------------------------|----|
| 1. Theoretical methods .....                                                                       | 2  |
| 1.1. Construction of Fe-C-H-O quaternary G-NN potential .....                                      | 2  |
| 1.2. Gibbs free energy correction .....                                                            | 28 |
| 1.3. Microkinetics simulation .....                                                                | 28 |
| 2. Structural details for surface model .....                                                      | 29 |
| 3. ML-TS of CO activation on Fe <sub>5</sub> C <sub>2</sub> (510) .....                            | 30 |
| 4. Reaction pathways for C-C coupling, O removal and C <sub>2</sub> H <sub>4</sub> formation ..... | 33 |
| 5. Microkinetics .....                                                                             | 38 |
| 5.1. Estimation of iron time yield (FTY) .....                                                     | 38 |
| 5.2. Analysis of chain growth probability factor ( $\alpha$ ) .....                                | 39 |
| 6. Properties of A-P5 sites .....                                                                  | 48 |
| 7. Interface structures .....                                                                      | 50 |

## 1. Theoretical methods

### 1.1. Construction of Fe–C–H–O quaternary G-NN potential

#### Architecture of neural network potential

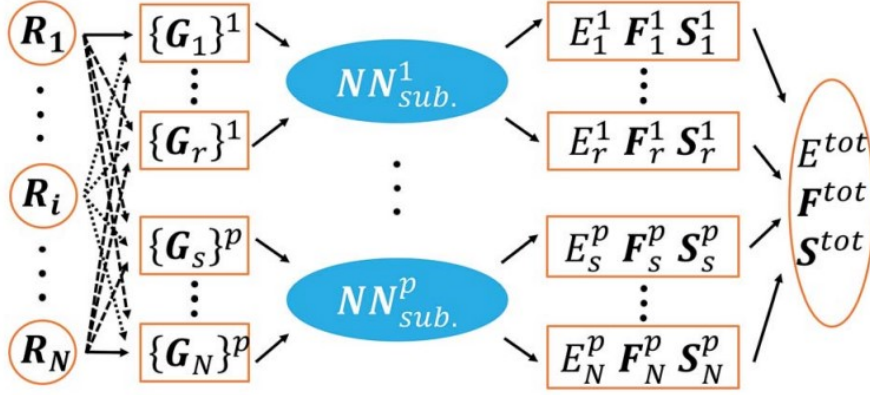

**Scheme S1.** Scheme for the HDNN architecture. The subscripts  $i$  and  $N$  represent atom indices and total number of atoms in a structure. The input of an NN is a set of structural descriptors  $\{\mathbf{G}_i\}$  constructed from Cartesian coordinates  $\{\mathbf{R}\}$  of a structure, and the outputs are the atomic properties  $\{E_i, \mathbf{F}_i, \mathbf{S}_i\}$ , i.e. energy, forces and stresses. The overall properties  $E^{tot}$ ,  $\mathbf{F}^{tot}$ , and  $\mathbf{S}^{tot}$ , can be calculated from the individual atomic contributions.

In this work, we utilized the high dimensional neural network (HDNN) scheme to construct the NN potential<sup>1-4</sup>. The NN architecture is schematically shown in Scheme S1. In Eq. 1, the total energy  $E^{tot}$  can be decomposed and written as a linear combination of atomic energy  $E_i$ , which is the output of the standard neural network. The input nodes are a set of geometry-based structural descriptors,  $\{\mathbf{G}_i\}$ .

$$E^{tot} = \sum_i E_i \quad (1)$$

The atomic force can be analytically derived according to Eq. 2, where the force component  $F_{k,\alpha}$ ,  $\alpha=x, y$  or  $z$ , acting on the atom  $k$  is the derivative of the total energy with respect to its coordinate  $R_{k,\alpha}$ . By combining with Eq. 1, the force component can be further related to the derivatives of the atomic energy with respect to  $j^{\text{th}}$  structural descriptors of atom  $i$ ,  $G_{j,i}$ :

$$F_{k,\alpha} = -\frac{\partial E^{tot}}{\partial R_{k,\alpha}} = -\sum_{i,j} \frac{\partial E_i}{\partial G_{j,i}} \frac{\partial G_{j,i}}{\partial R_{k,\alpha}} \quad (2)$$

Similarly, the static stress tensor matrix element  $\sigma_{\alpha\beta}$  can be analytically derived as:

$$\sigma_{\alpha\beta} = -\frac{1}{V} \sum_{i,j,d} \frac{(r_d)_\alpha (r_d)_\beta}{r_d} \frac{\partial E_i}{\partial G_{j,i}} \frac{\partial G_{j,i}}{\partial r_d} \quad (3)$$

where  $\mathbf{r}_d$  and  $r_d$  are the distance vectors constituting of  $G_{j,i}$  and its module, respectively, and  $V$  is the volume of the structure.

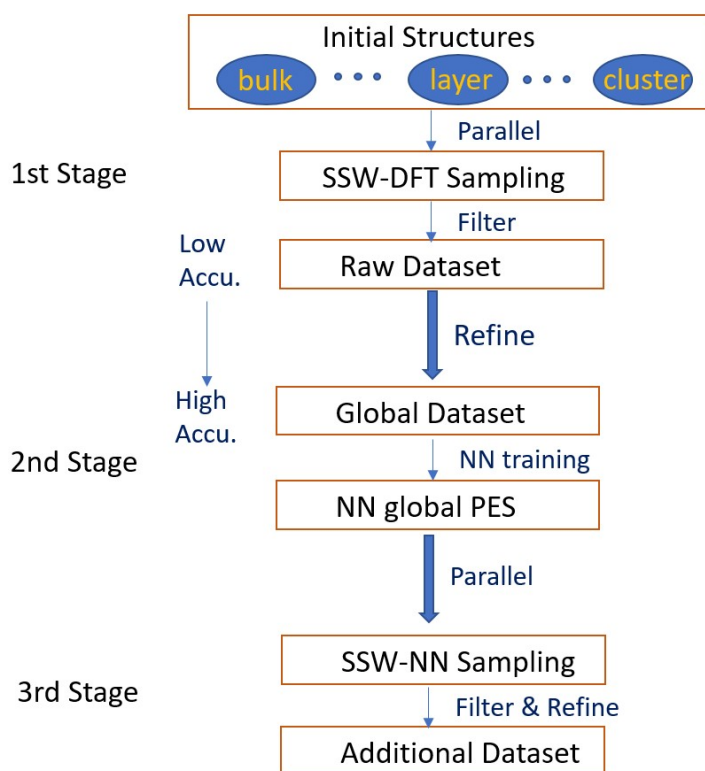

**Scheme S2.** Procedure for the generation of the global training dataset by SSW global optimization. In the first stage, the SSW sampling is typically performed by low accuracy DFT calculations. In the second stage, the global dataset is first refined with high accuracy DFT setups, and then an NN training is performed based on the accurate global dataset. In the third stage, an additional dataset is generated by SSW sampling utilizing the previously obtained NN PES, and is fed into the global dataset. A new cycle of NN training then starts based on the new global dataset (back to stage 2).

### Construction of the global data set using SSW-NN

Undoubtedly, the data set used for training the NN determines largely the quality of the potential energy surface (PES) of G-NN. Our previous works have shown that the stochastic surface walking (SSW) global optimization<sup>5-7</sup> can be used to fast generate a global data set, which incorporates different structural patterns on the global PES. The SSW PES search is fully automated and does not need a priori knowledge on the system, such as the structure motif (e.g., bonding patterns, symmetry) of materials. The brief description of the Fe-C-H-O global data set in this work is detailed in Table S1, and the G-NN data set and potential can be openly downloaded from [http://www.lasphub.com/supportings/Trainfile\\_FeCHO.tar.gz](http://www.lasphub.com/supportings/Trainfile_FeCHO.tar.gz) and <http://www.lasphub.com/supportings/FeCHO.pot>.

In brief, the SSW-NN method involves three stages for constructing the global data set, as described in the following.

- (i) **The first stage** constructs a raw data set, which contains the most common atomic environment and serves as the training data set for building an initial NN PES. This is done by performing density functional theory (DFT) SSW global optimization in a massively parallel way. The DFT calculation is typically with low accuracy setups and restricted to small unit cells to speed up the SSW search. By collecting and screening the structures from the SSW

trajectories, a raw data set is finally obtained. The low accuracy calculations use 300 eV kinetics energy cutoff and 15 Å<sup>-1</sup> *k*-point auto-mesh (15 Å<sup>-1</sup> auto-mesh means the first Brillouin zone *k*-point sampling adopted the Monkhorst-Pack scheme with an automated mesh determined by 15 times the reciprocal lattice vectors).

- (ii) **The second stage** trains an NN global PES. This is done by first refining the data set using first principles calculation with high accuracy setups, followed by the NN training on the accurate global data set. The high accuracy calculation for producing the data set use 450 eV kinetics energy cutoff and 25 Å<sup>-1</sup> *k*-point auto-mesh. The NN architecture applied in this stage utilizes a small set of structural descriptors and a small network size.
- (iii) **The third stage** iteratively expands the global data set. It targets to increase the predictive power of NN PES by incorporating more structural patterns into the data set. This is done by carrying out SSW PES search using the NN potential obtained in the second stage, starting from a variety of initial structures. These initial structures are often randomly configurated and also include large systems with many atoms per unit cell. The structures from all SSW trajectories are collected and filtered to generate the additional data set. This new data set is then fed to the global data set (back to stage 2) to start a new cycle of NN training.

**Table S1.** Structure information of the global PES data set for G-NN potential training. The listed data is the number of structures in the data set, as distinguished by the chemical formula, the number of atoms per cell ( $N_{\text{atom}}$ ) and the type of structure, including cluster ( $N_{\text{cluster}}$ ), layer ( $N_{\text{layer}}$ ) and bulk ( $N_{\text{bulk}}$ ). The total numbers of the structure ( $N_{\text{total}}$ ) are also summarized.

| Species | $N_{\text{atom}}$ | $N_{\text{cluster}}$ | $N_{\text{layer}}$ | $N_{\text{bulk}}$ | $N_{\text{total}}$ |
|---------|-------------------|----------------------|--------------------|-------------------|--------------------|
| Fe4     | 4                 | 0                    | 0                  | 10                | 10                 |
| Fe16    | 16                | 70                   | 81                 | 476               | 627                |
| Fe28    | 28                | 0                    | 0                  | 12                | 12                 |
| Fe29    | 29                | 0                    | 0                  | 33                | 33                 |
| Fe30    | 30                | 0                    | 0                  | 85                | 85                 |
| Fe31    | 31                | 0                    | 0                  | 168               | 168                |
| Fe32    | 32                | 0                    | 27                 | 204               | 231                |
| Fe60    | 60                | 0                    | 1                  | 16                | 17                 |
| Fe61    | 61                | 0                    | 0                  | 11                | 11                 |
| Fe62    | 62                | 0                    | 0                  | 14                | 14                 |
| Fe127   | 127               | 0                    | 0                  | 280               | 280                |
| Fe128   | 128               | 0                    | 0                  | 1                 | 1                  |
| O1-Fe3  | 4                 | 0                    | 0                  | 1                 | 1                  |
| O1-Fe15 | 16                | 1                    | 2                  | 10                | 13                 |
| O2-Fe11 | 13                | 0                    | 1                  | 0                 | 1                  |
| O2-Fe14 | 16                | 0                    | 4                  | 10                | 14                 |
| O2-Fe30 | 32                | 0                    | 2                  | 0                 | 2                  |
| O4      | 4                 | 0                    | 37                 | 0                 | 37                 |
| O11     | 11                | 0                    | 195                | 96                | 291                |
| C1-Fe12 | 13                | 0                    | 39                 | 0                 | 39                 |
| C1-Fe18 | 19                | 0                    | 81                 | 240               | 321                |
| C1-Fe31 | 32                | 0                    | 122                | 1                 | 123                |

|            |    |   |     |     |     |
|------------|----|---|-----|-----|-----|
| C1-O1-Fe11 | 13 | 0 | 2   | 0   | 2   |
| C1-O1-Fe17 | 19 | 0 | 4   | 8   | 12  |
| C1-O1-Fe30 | 32 | 0 | 2   | 0   | 2   |
| C1-O2-Fe9  | 12 | 0 | 1   | 0   | 1   |
| C1-O2-Fe16 | 19 | 0 | 2   | 6   | 8   |
| C1-O2-Fe29 | 32 | 0 | 1   | 0   | 1   |
| C2-Fe10    | 12 | 0 | 53  | 0   | 53  |
| C2-Fe17    | 19 | 0 | 0   | 30  | 30  |
| C2-Fe25    | 27 | 0 | 0   | 1   | 1   |
| C2-Fe29    | 31 | 0 | 0   | 10  | 10  |
| C2-Fe36    | 38 | 0 | 21  | 0   | 21  |
| C2-O1-Fe9  | 12 | 0 | 3   | 0   | 3   |
| C2-O1-Fe16 | 19 | 0 | 0   | 1   | 1   |
| C2-O2-Fe8  | 12 | 0 | 1   | 0   | 1   |
| C2-O2-Fe15 | 19 | 0 | 0   | 1   | 1   |
| C2-O2-Fe34 | 38 | 0 | 1   | 0   | 1   |
| C3-Fe16    | 19 | 5 | 0   | 0   | 5   |
| C3-O1-Fe8  | 12 | 0 | 0   | 1   | 1   |
| C3-O2-Fe7  | 12 | 0 | 0   | 2   | 2   |
| C4-Fe8     | 12 | 0 | 0   | 182 | 182 |
| C4-Fe12    | 16 | 0 | 0   | 41  | 41  |
| C4-Fe25    | 29 | 0 | 0   | 1   | 1   |
| C4-O1-Fe7  | 12 | 0 | 0   | 3   | 3   |
| C4-O2-Fe6  | 12 | 0 | 0   | 2   | 2   |
| C5-Fe14    | 19 | 0 | 10  | 4   | 14  |
| C5-O1-Fe12 | 18 | 0 | 0   | 2   | 2   |
| C5-O1-Fe13 | 19 | 0 | 1   | 0   | 1   |
| C5-O1-Fe14 | 20 | 0 | 0   | 3   | 3   |
| C5-O1-Fe23 | 29 | 0 | 1   | 0   | 1   |
| C5-O2-Fe11 | 18 | 0 | 2   | 1   | 3   |
| C5-O2-Fe13 | 20 | 0 | 2   | 0   | 2   |
| C5-O2-Fe14 | 21 | 0 | 1   | 1   | 2   |
| C5-O2-Fe22 | 29 | 0 | 0   | 3   | 3   |
| C5-O2-Fe24 | 31 | 0 | 1   | 0   | 1   |
| C6-Fe10    | 16 | 0 | 1   | 8   | 9   |
| C6-Fe12    | 18 | 0 | 117 | 104 | 221 |
| C6-Fe14    | 20 | 0 | 109 | 119 | 228 |
| C6-Fe15    | 21 | 0 | 77  | 123 | 200 |
| C6-Fe23    | 29 | 0 | 89  | 197 | 286 |
| C6-Fe24    | 30 | 0 | 0   | 104 | 104 |
| C6-Fe25    | 31 | 0 | 120 | 260 | 380 |
| C6-O1-Fe9  | 16 | 0 | 0   | 2   | 2   |
| C6-O1-Fe11 | 18 | 0 | 2   | 4   | 6   |
| C6-O1-Fe13 | 20 | 0 | 2   | 1   | 3   |
| C6-O1-Fe14 | 21 | 0 | 3   | 2   | 5   |

|             |    |   |     |     |     |
|-------------|----|---|-----|-----|-----|
| C6-O1-Fe22  | 29 | 0 | 1   | 2   | 3   |
| C6-O1-Fe24  | 31 | 0 | 1   | 2   | 3   |
| C6-O2-Fe10  | 18 | 0 | 3   | 3   | 6   |
| C6-O2-Fe12  | 20 | 0 | 4   | 2   | 6   |
| C6-O2-Fe13  | 21 | 0 | 1   | 3   | 4   |
| C6-O2-Fe21  | 29 | 0 | 1   | 8   | 9   |
| C6-O2-Fe23  | 31 | 0 | 2   | 3   | 5   |
| C7-Fe16     | 23 | 0 | 0   | 24  | 24  |
| C7-O2-Fe11  | 20 | 0 | 0   | 1   | 1   |
| C7-O2-Fe15  | 24 | 1 | 0   | 0   | 1   |
| C8          | 8  | 0 | 17  | 289 | 306 |
| C8-Fe12     | 20 | 0 | 8   | 36  | 44  |
| C8-Fe16     | 24 | 3 | 0   | 33  | 36  |
| C8-Fe20     | 28 | 0 | 0   | 52  | 52  |
| C9-Fe15     | 24 | 0 | 15  | 30  | 45  |
| C9-O1-Fe14  | 24 | 0 | 1   | 0   | 1   |
| C9-O2-Fe9   | 20 | 0 | 0   | 1   | 1   |
| C9-O2-Fe12  | 23 | 0 | 0   | 1   | 1   |
| C10-Fe10    | 20 | 0 | 21  | 40  | 61  |
| C10-Fe13    | 23 | 0 | 0   | 17  | 17  |
| C10-Fe22    | 32 | 0 | 0   | 84  | 84  |
| C10-Fe27    | 37 | 0 | 9   | 0   | 9   |
| C10-Fe28    | 38 | 0 | 3   | 1   | 4   |
| C10-Fe30    | 40 | 0 | 8   | 8   | 16  |
| C10-O1-Fe9  | 20 | 0 | 1   | 0   | 1   |
| C10-O2-Fe8  | 20 | 0 | 1   | 1   | 2   |
| C10-O2-Fe16 | 28 | 0 | 0   | 1   | 1   |
| C11-Fe28    | 39 | 0 | 10  | 3   | 13  |
| C11-O1-Fe27 | 39 | 0 | 1   | 0   | 1   |
| C11-O1-Fe30 | 42 | 0 | 161 | 17  | 178 |
| C11-O2-Fe27 | 40 | 0 | 1   | 0   | 1   |
| C11-O2-Fe29 | 42 | 0 | 1   | 0   | 1   |
| C12-Fe16    | 28 | 0 | 20  | 61  | 81  |
| C12-Fe20    | 32 | 0 | 0   | 64  | 64  |
| C12-Fe24    | 36 | 0 | 25  | 0   | 25  |
| C12-Fe26    | 38 | 0 | 8   | 1   | 9   |
| C12-Fe27    | 39 | 0 | 3   | 1   | 4   |
| C12-Fe28    | 40 | 0 | 75  | 321 | 396 |
| C12-Fe30    | 42 | 0 | 27  | 0   | 27  |
| C12-Fe46    | 58 | 0 | 23  | 0   | 23  |
| C12-Fe50    | 62 | 0 | 19  | 0   | 19  |
| C12-O1-Fe27 | 40 | 0 | 0   | 1   | 1   |
| C12-O2-Fe14 | 28 | 0 | 1   | 1   | 2   |
| C12-O2-Fe26 | 40 | 0 | 1   | 1   | 2   |
| C12-O2-Fe28 | 42 | 0 | 136 | 0   | 136 |

|             |     |   |     |     |     |
|-------------|-----|---|-----|-----|-----|
| C13-O1-Fe28 | 42  | 0 | 51  | 0   | 51  |
| C13-O1-Fe30 | 44  | 0 | 44  | 1   | 45  |
| C14-O1-Fe29 | 44  | 0 | 49  | 0   | 49  |
| C15-O2-Fe25 | 42  | 0 | 2   | 0   | 2   |
| C16-Fe24    | 40  | 0 | 0   | 106 | 106 |
| C16-Fe26    | 42  | 0 | 111 | 0   | 111 |
| C16-O2-Fe24 | 42  | 0 | 1   | 0   | 1   |
| C17-Fe41    | 58  | 0 | 97  | 1   | 98  |
| C18-O2-Fe16 | 36  | 0 | 2   | 0   | 2   |
| C19-Fe17    | 36  | 0 | 122 | 1   | 123 |
| C19-O1-Fe16 | 36  | 0 | 1   | 0   | 1   |
| C19-O2-Fe15 | 36  | 0 | 2   | 0   | 2   |
| C22-Fe55    | 77  | 0 | 1   | 1   | 2   |
| C22-Fe56    | 78  | 0 | 3   | 0   | 3   |
| C24-Fe51    | 75  | 0 | 3   | 1   | 4   |
| C24-Fe52    | 76  | 0 | 4   | 1   | 5   |
| C24-Fe53    | 77  | 0 | 3   | 1   | 4   |
| C24-Fe54    | 78  | 0 | 3   | 2   | 5   |
| C25-Fe11    | 36  | 0 | 49  | 1   | 50  |
| C28-Fe16    | 44  | 0 | 33  | 3   | 36  |
| C30-O2-Fe72 | 104 | 0 | 23  | 0   | 23  |
| C30-O2-Fe74 | 106 | 0 | 61  | 0   | 61  |
| C32-Fe64    | 96  | 0 | 1   | 0   | 1   |
| C32-Fe74    | 106 | 0 | 18  | 0   | 18  |
| C32-O1-Fe64 | 97  | 0 | 1   | 0   | 1   |
| C32-O2-Fe74 | 108 | 0 | 90  | 0   | 90  |
| C33-O1-Fe74 | 108 | 0 | 98  | 0   | 98  |
| C34-O1-Fe74 | 109 | 0 | 72  | 0   | 72  |
| C35-Fe80    | 115 | 0 | 3   | 0   | 3   |
| C36-Fe80    | 116 | 0 | 1   | 0   | 1   |
| C36-O1-Fe80 | 117 | 0 | 137 | 0   | 137 |
| C37-O1-Fe80 | 118 | 0 | 253 | 0   | 253 |
| C38-Fe16    | 54  | 0 | 23  | 0   | 23  |
| C39-Fe120   | 159 | 0 | 3   | 0   | 3   |
| C40-Fe16    | 56  | 0 | 23  | 0   | 23  |
| C40-O1-Fe96 | 137 | 0 | 24  | 0   | 24  |
| C41-Fe120   | 161 | 0 | 12  | 0   | 12  |
| C41-O5-Fe80 | 126 | 0 | 1   | 0   | 1   |
| C42-Fe120   | 162 | 0 | 20  | 0   | 20  |
| C42-O6-Fe80 | 128 | 0 | 1   | 0   | 1   |
| C43-Fe96    | 139 | 0 | 8   | 0   | 8   |
| C43-O7-Fe80 | 130 | 0 | 19  | 0   | 19  |
| C44-Fe16    | 60  | 0 | 50  | 1   | 51  |
| C44-Fe96    | 140 | 0 | 4   | 0   | 4   |
| C44-O1-Fe80 | 125 | 0 | 10  | 0   | 10  |

|               |     |   |     |    |     |
|---------------|-----|---|-----|----|-----|
| C44-O1-Fe96   | 141 | 0 | 11  | 0  | 11  |
| C47-Fe84      | 131 | 0 | 1   | 0  | 1   |
| C47-Fe96      | 143 | 0 | 85  | 0  | 85  |
| C47-Fe112     | 159 | 0 | 20  | 0  | 20  |
| C47-Fe120     | 167 | 0 | 11  | 0  | 11  |
| C48-Fe84      | 132 | 0 | 1   | 0  | 1   |
| C48-O1-Fe84   | 133 | 0 | 85  | 0  | 85  |
| C49-Fe96      | 145 | 0 | 21  | 0  | 21  |
| C49-Fe112     | 161 | 0 | 27  | 0  | 27  |
| C49-Fe120     | 169 | 0 | 5   | 0  | 5   |
| C49-O1-Fe84   | 134 | 0 | 24  | 0  | 24  |
| C49-O1-Fe120  | 170 | 0 | 170 | 0  | 170 |
| C49-O2-Fe112  | 163 | 0 | 1   | 0  | 1   |
| C50-Fe96      | 146 | 0 | 16  | 0  | 16  |
| C50-Fe112     | 162 | 0 | 16  | 0  | 16  |
| C50-Fe120     | 170 | 0 | 8   | 0  | 8   |
| C52-O4-Fe112  | 168 | 0 | 8   | 0  | 8   |
| C53-O5-Fe112  | 170 | 0 | 53  | 0  | 53  |
| C60-O4-Fe144  | 208 | 0 | 3   | 0  | 3   |
| C60-O4-Fe148  | 212 | 0 | 3   | 0  | 3   |
| C64-Fe148     | 212 | 0 | 1   | 0  | 1   |
| C64-O1-Fe136  | 201 | 0 | 8   | 0  | 8   |
| C64-O4-Fe148  | 216 | 0 | 4   | 0  | 4   |
| C104-O1-Fe224 | 329 | 0 | 10  | 0  | 10  |
| H1-Fe15       | 16  | 0 | 0   | 23 | 23  |
| H1-Fe16       | 17  | 0 | 0   | 1  | 1   |
| H1-Fe23       | 24  | 0 | 5   | 0  | 5   |
| H1-Fe26       | 27  | 0 | 10  | 0  | 10  |
| H1-Fe27       | 28  | 0 | 6   | 0  | 6   |
| H1-Fe31       | 32  | 0 | 0   | 3  | 3   |
| H1-O2-Fe13    | 16  | 0 | 0   | 1  | 1   |
| H1-C1-Fe30    | 32  | 0 | 52  | 1  | 53  |
| H1-C5-Fe18    | 24  | 0 | 0   | 7  | 7   |
| H1-C6-O2-Fe15 | 24  | 0 | 1   | 0  | 1   |
| H1-C7-O1-Fe15 | 24  | 0 | 2   | 0  | 2   |
| H1-C7-O2-Fe10 | 20  | 0 | 3   | 0  | 3   |
| H1-C8-Fe11    | 20  | 0 | 67  | 2  | 69  |
| H1-C8-Fe15    | 24  | 0 | 96  | 2  | 98  |
| H1-C8-O1-Fe10 | 20  | 0 | 4   | 0  | 4   |
| H1-C8-O1-Fe14 | 24  | 0 | 1   | 0  | 1   |
| H1-C8-O2-Fe9  | 20  | 0 | 7   | 0  | 7   |
| H1-C9-Fe10    | 20  | 0 | 440 | 56 | 496 |
| H1-C9-O1-Fe9  | 20  | 0 | 4   | 0  | 4   |
| H1-C9-O2-Fe8  | 20  | 0 | 7   | 0  | 7   |
| H1-C9-O2-Fe16 | 28  | 0 | 2   | 0  | 2   |



|                 |     |     |     |    |     |
|-----------------|-----|-----|-----|----|-----|
| H1-C10-O1-Fe16  | 28  | 0   | 3   | 0  | 3   |
| H1-C10-O2-Fe15  | 28  | 0   | 6   | 0  | 6   |
| H1-C11-Fe16     | 28  | 0   | 234 | 44 | 278 |
| H1-C11-O1-Fe15  | 28  | 0   | 1   | 1  | 2   |
| H1-C11-O2-Fe14  | 28  | 0   | 3   | 2  | 5   |
| H1-C11-O2-Fe28  | 42  | 0   | 270 | 2  | 272 |
| H1-C12-O1-Fe28  | 42  | 0   | 95  | 0  | 95  |
| H1-C32-O1-Fe64  | 98  | 0   | 10  | 0  | 10  |
| H1-C37-O1-Fe80  | 119 | 0   | 17  | 0  | 17  |
| H1-C40-O4-Fe80  | 125 | 0   | 4   | 0  | 4   |
| H1-C41-Fe120    | 162 | 0   | 1   | 0  | 1   |
| H1-C41-O1-Fe96  | 139 | 0   | 4   | 0  | 4   |
| H1-C42-Fe120    | 163 | 0   | 13  | 0  | 13  |
| H1-C45-O1-Fe96  | 143 | 0   | 18  | 0  | 18  |
| H1-C48-Fe84     | 133 | 0   | 2   | 0  | 2   |
| H1-C48-O1-Fe84  | 134 | 0   | 26  | 0  | 26  |
| H1-C49-Fe96     | 146 | 0   | 17  | 0  | 17  |
| H1-C49-Fe112    | 162 | 0   | 21  | 0  | 21  |
| H1-C49-Fe120    | 170 | 0   | 1   | 0  | 1   |
| H1-C49-O1-Fe120 | 171 | 0   | 198 | 0  | 198 |
| H1-C50-Fe96     | 147 | 0   | 3   | 0  | 3   |
| H1-C50-Fe112    | 163 | 0   | 5   | 0  | 5   |
| H1-C50-Fe120    | 171 | 0   | 9   | 0  | 9   |
| H2              | 2   | 1   | 0   | 0  | 1   |
| H2-Fe14         | 16  | 0   | 5   | 42 | 47  |
| H2-Fe16         | 18  | 0   | 88  | 91 | 179 |
| H2-Fe21         | 23  | 0   | 0   | 10 | 10  |
| H2-Fe22         | 24  | 0   | 1   | 0  | 1   |
| H2-Fe27         | 29  | 1   | 1   | 5  | 7   |
| H2-Fe28         | 30  | 0   | 5   | 0  | 5   |
| H2-Fe30         | 32  | 1   | 0   | 2  | 3   |
| H2-O1-Fe13      | 16  | 0   | 0   | 2  | 2   |
| H2-O1-Fe15      | 18  | 0   | 6   | 3  | 9   |
| H2-O2-Fe14      | 18  | 0   | 0   | 4  | 4   |
| H2-C1           | 3   | 4   | 0   | 0  | 4   |
| H2-C1-O1        | 4   | 103 | 0   | 0  | 103 |
| H2-C1-O2        | 5   | 40  | 0   | 0  | 40  |
| H2-C1-O2-Fe12   | 17  | 0   | 15  | 1  | 16  |
| H2-C1-O2-Fe16   | 21  | 0   | 10  | 0  | 10  |
| H2-C1-O2-Fe20   | 25  | 0   | 4   | 0  | 4   |
| H2-C1-O2-Fe36   | 41  | 0   | 11  | 0  | 11  |
| H2-C1-O3        | 6   | 11  | 0   | 0  | 11  |
| H2-C1-O3-Fe36   | 42  | 0   | 3   | 0  | 3   |
| H2-C2           | 4   | 86  | 0   | 0  | 86  |
| H2-C2-Fe18      | 22  | 0   | 0   | 16 | 16  |

|                |    |    |     |     |     |
|----------------|----|----|-----|-----|-----|
| H2-C2-O2-Fe16  | 22 | 0  | 0   | 2   | 2   |
| H2-C2-O3-Fe26  | 33 | 0  | 1   | 0   | 1   |
| H2-C2-O3-Fe27  | 34 | 0  | 7   | 0   | 7   |
| H2-C3-Fe17     | 22 | 0  | 0   | 17  | 17  |
| H2-C3-O1-Fe23  | 29 | 0  | 1   | 0   | 1   |
| H2-C3-O2-Fe22  | 29 | 0  | 0   | 4   | 4   |
| H2-C3-O2-Fe26  | 33 | 0  | 9   | 0   | 9   |
| H2-C3-O2-Fe27  | 34 | 0  | 5   | 0   | 5   |
| H2-C4-Fe18     | 24 | 0  | 0   | 16  | 16  |
| H2-C4-Fe23     | 29 | 0  | 99  | 214 | 313 |
| H2-C4-O1-Fe22  | 29 | 0  | 0   | 4   | 4   |
| H2-C4-O1-Fe26  | 33 | 0  | 1   | 0   | 1   |
| H2-C4-O1-Fe27  | 34 | 0  | 5   | 0   | 5   |
| H2-C4-O2-Fe21  | 29 | 0  | 0   | 5   | 5   |
| H2-C4-O3       | 9  | 60 | 0   | 0   | 60  |
| H2-C4-O4       | 10 | 2  | 0   | 0   | 2   |
| H2-C4-O5       | 11 | 8  | 0   | 0   | 8   |
| H2-C5-Fe18     | 25 | 0  | 0   | 10  | 10  |
| H2-C5-O2-Fe13  | 22 | 0  | 0   | 1   | 1   |
| H2-C5-O2-Fe15  | 24 | 0  | 0   | 1   | 1   |
| H2-C5-O3       | 10 | 6  | 0   | 0   | 6   |
| H2-C5-O4       | 11 | 4  | 0   | 0   | 4   |
| H2-C6-Fe16     | 24 | 0  | 0   | 15  | 15  |
| H2-C6-O1-Fe13  | 22 | 0  | 2   | 5   | 7   |
| H2-C6-O2       | 10 | 2  | 0   | 0   | 2   |
| H2-C6-O2-Fe12  | 22 | 0  | 2   | 0   | 2   |
| H2-C6-O2-Fe17  | 27 | 0  | 0   | 1   | 1   |
| H2-C7-Fe10     | 19 | 0  | 21  | 5   | 26  |
| H2-C7-Fe13     | 22 | 0  | 99  | 258 | 357 |
| H2-C7-Fe18     | 27 | 0  | 0   | 28  | 28  |
| H2-C7-O1       | 10 | 2  | 0   | 0   | 2   |
| H2-C7-O1-Fe10  | 20 | 0  | 2   | 0   | 2   |
| H2-C7-O1-Fe12  | 22 | 0  | 0   | 6   | 6   |
| H2-C7-O2-Fe9   | 20 | 0  | 3   | 0   | 3   |
| H2-C7-O2-Fe11  | 22 | 0  | 1   | 4   | 5   |
| H2-C7-O2-Fe16  | 27 | 0  | 0   | 2   | 2   |
| H2-C8-Fe10     | 20 | 0  | 68  | 6   | 74  |
| H2-C8-O1-Fe9   | 20 | 0  | 1   | 1   | 2   |
| H2-C8-O2-Fe8   | 20 | 0  | 2   | 0   | 2   |
| H2-C9-Fe13     | 24 | 0  | 0   | 12  | 12  |
| H2-C9-Fe16     | 27 | 0  | 0   | 10  | 10  |
| H2-C9-O2-Fe15  | 28 | 0  | 1   | 0   | 1   |
| H2-C10-Fe16    | 28 | 0  | 16  | 3   | 19  |
| H2-C10-O1-Fe15 | 28 | 0  | 0   | 1   | 1   |
| H2-C11-O1-Fe28 | 42 | 0  | 163 | 0   | 163 |

|                |     |   |     |    |     |
|----------------|-----|---|-----|----|-----|
| H2-C12-Fe28    | 42  | 0 | 55  | 0  | 55  |
| H2-C12-Fe48    | 62  | 0 | 42  | 0  | 42  |
| H2-C13-Fe30    | 45  | 0 | 49  | 0  | 49  |
| H2-C13-O1-Fe28 | 44  | 0 | 268 | 0  | 268 |
| H2-C14-Fe28    | 44  | 0 | 39  | 0  | 39  |
| H2-C14-Fe33    | 49  | 0 | 43  | 0  | 43  |
| H2-C20-Fe40    | 62  | 0 | 28  | 0  | 28  |
| H2-C25-Fe35    | 62  | 0 | 89  | 0  | 89  |
| H2-C30-Fe74    | 106 | 0 | 14  | 0  | 14  |
| H2-C32-Fe64    | 98  | 0 | 36  | 0  | 36  |
| H2-C32-Fe74    | 108 | 0 | 60  | 0  | 60  |
| H2-C32-O1-Fe74 | 109 | 0 | 47  | 0  | 47  |
| H2-C33-O1-Fe64 | 100 | 0 | 2   | 0  | 2   |
| H2-C36-Fe80    | 118 | 0 | 276 | 0  | 276 |
| H2-C40-O4-Fe80 | 126 | 0 | 1   | 0  | 1   |
| H2-C40-O5-Fe80 | 127 | 0 | 72  | 0  | 72  |
| H2-C41-O4-Fe80 | 127 | 0 | 4   | 0  | 4   |
| H2-C41-O6-Fe80 | 129 | 0 | 32  | 0  | 32  |
| H2-C42-Fe120   | 164 | 0 | 5   | 0  | 5   |
| H2-C49-Fe96    | 147 | 0 | 21  | 0  | 21  |
| H2-C49-Fe112   | 163 | 0 | 11  | 0  | 11  |
| H2-C49-Fe120   | 171 | 0 | 12  | 0  | 12  |
| H2-C50-Fe112   | 164 | 0 | 17  | 0  | 17  |
| H2-C50-Fe120   | 172 | 0 | 13  | 0  | 13  |
| H3-Fe26        | 29  | 0 | 4   | 0  | 4   |
| H3-Fe29        | 32  | 0 | 0   | 1  | 1   |
| H3-O2-Fe24     | 29  | 0 | 1   | 0  | 1   |
| H3-C1          | 4   | 7 | 0   | 0  | 7   |
| H3-C1-O1-Fe15  | 20  | 0 | 20  | 1  | 21  |
| H3-C1-O1-Fe16  | 21  | 0 | 16  | 0  | 16  |
| H3-C1-O1-Fe20  | 25  | 0 | 4   | 0  | 4   |
| H3-C1-O2-Fe15  | 21  | 0 | 13  | 0  | 13  |
| H3-C1-O2-Fe16  | 22  | 0 | 18  | 0  | 18  |
| H3-C1-O2-Fe36  | 42  | 0 | 3   | 0  | 3   |
| H3-C1-O3-Fe35  | 42  | 0 | 1   | 0  | 1   |
| H3-C2-Fe22     | 27  | 0 | 0   | 13 | 13  |
| H3-C2-Fe33     | 38  | 0 | 45  | 2  | 47  |
| H3-C2-O2-Fe26  | 33  | 0 | 2   | 0  | 2   |
| H3-C2-O2-Fe27  | 34  | 0 | 4   | 0  | 4   |
| H3-C2-O3-Fe34  | 42  | 0 | 10  | 0  | 10  |
| H3-C2-O3-Fe36  | 44  | 0 | 15  | 0  | 15  |
| H3-C2-O4-Fe32  | 41  | 0 | 1   | 0  | 1   |
| H3-C2-O4-Fe33  | 42  | 0 | 3   | 0  | 3   |
| H3-C2-O4-Fe35  | 44  | 0 | 4   | 0  | 4   |
| H3-C3-O1-Fe27  | 34  | 0 | 5   | 0  | 5   |

|                 |     |     |     |     |     |
|-----------------|-----|-----|-----|-----|-----|
| H3-C3-O2-Fe25   | 33  | 0   | 2   | 0   | 2   |
| H3-C3-O3-Fe35   | 44  | 0   | 5   | 1   | 6   |
| H3-C4-O2-Fe16   | 25  | 0   | 0   | 1   | 1   |
| H3-C5-O1-Fe16   | 25  | 0   | 0   | 1   | 1   |
| H3-C5-O2-Fe15   | 25  | 0   | 0   | 2   | 2   |
| H3-C6-Fe16      | 25  | 0   | 102 | 226 | 328 |
| H3-C6-Fe22      | 31  | 0   | 0   | 4   | 4   |
| H3-C6-O1-Fe15   | 25  | 0   | 3   | 3   | 6   |
| H3-C6-O2-Fe14   | 25  | 0   | 0   | 5   | 5   |
| H3-C8-Fe14      | 25  | 0   | 0   | 6   | 6   |
| H3-C12-O2-Fe36  | 53  | 0   | 156 | 0   | 156 |
| H3-C13-Fe40     | 56  | 0   | 41  | 0   | 41  |
| H3-C13-O2-Fe35  | 53  | 0   | 276 | 0   | 276 |
| H3-C13-O2-Fe36  | 54  | 0   | 219 | 0   | 219 |
| H3-C14-O2-Fe35  | 54  | 0   | 183 | 0   | 183 |
| H3-C14-O2-Fe36  | 55  | 0   | 498 | 0   | 498 |
| H3-C15-O1-Fe35  | 54  | 0   | 283 | 0   | 283 |
| H3-C15-O1-Fe36  | 55  | 0   | 280 | 0   | 280 |
| H3-C15-O2-Fe35  | 55  | 0   | 166 | 0   | 166 |
| H3-C16-Fe35     | 54  | 0   | 133 | 0   | 133 |
| H3-C16-Fe36     | 55  | 0   | 141 | 0   | 141 |
| H3-C32-O1-Fe74  | 110 | 0   | 197 | 0   | 197 |
| H3-C33-O1-Fe64  | 101 | 0   | 79  | 0   | 79  |
| H3-C40-O6-Fe80  | 129 | 0   | 21  | 0   | 21  |
| H3-C41-Fe120    | 164 | 0   | 6   | 0   | 6   |
| H3-C41-O4-Fe80  | 128 | 0   | 35  | 0   | 35  |
| H3-C49-Fe96     | 148 | 0   | 33  | 0   | 33  |
| H3-C49-Fe112    | 164 | 0   | 5   | 0   | 5   |
| H3-C49-Fe120    | 172 | 0   | 7   | 0   | 7   |
| H3-C49-O1-Fe112 | 165 | 0   | 13  | 0   | 13  |
| H3-C50-Fe120    | 173 | 0   | 20  | 0   | 20  |
| H3-C50-O2-Fe112 | 167 | 0   | 13  | 0   | 13  |
| H4-Fe12         | 16  | 232 | 0   | 13  | 245 |
| H4-Fe17         | 21  | 0   | 0   | 12  | 12  |
| H4-Fe20         | 24  | 0   | 4   | 0   | 4   |
| H4-Fe24         | 28  | 0   | 2   | 0   | 2   |
| H4-Fe32         | 36  | 0   | 26  | 0   | 26  |
| H4-O1-Fe11      | 16  | 10  | 0   | 0   | 10  |
| H4-O2-Fe10      | 16  | 8   | 0   | 0   | 8   |
| H4-O2-Fe15      | 21  | 0   | 0   | 1   | 1   |
| H4-O2-Fe18      | 24  | 0   | 1   | 0   | 1   |
| H4-O2-Fe30      | 36  | 0   | 1   | 0   | 1   |
| H4-C1           | 5   | 128 | 0   | 0   | 128 |
| H4-C1-Fe31      | 36  | 0   | 98  | 2   | 100 |
| H4-C1-Fe36      | 41  | 0   | 36  | 0   | 36  |

|                |    |     |    |    |     |
|----------------|----|-----|----|----|-----|
| H4-C1-O1       | 6  | 36  | 0  | 0  | 36  |
| H4-C1-O1-Fe16  | 22 | 0   | 29 | 0  | 29  |
| H4-C1-O1-Fe30  | 36 | 0   | 2  | 0  | 2   |
| H4-C1-O1-Fe35  | 41 | 0   | 1  | 0  | 1   |
| H4-C1-O2       | 7  | 0   | 7  | 0  | 7   |
| H4-C1-O2-Fe29  | 36 | 0   | 2  | 0  | 2   |
| H4-C1-O2-Fe36  | 43 | 0   | 1  | 0  | 1   |
| H4-C1-O3-Fe36  | 44 | 0   | 3  | 0  | 3   |
| H4-C2          | 6  | 34  | 0  | 0  | 34  |
| H4-C2-O1       | 7  | 157 | 0  | 0  | 157 |
| H4-C2-O1-Fe15  | 22 | 0   | 8  | 0  | 8   |
| H4-C2-O2       | 8  | 51  | 3  | 4  | 58  |
| H4-C2-O2-Fe33  | 41 | 0   | 21 | 2  | 23  |
| H4-C2-O3-Fe32  | 41 | 0   | 3  | 0  | 3   |
| H4-C2-O3-Fe34  | 43 | 0   | 1  | 0  | 1   |
| H4-C2-O4-Fe36  | 46 | 0   | 8  | 0  | 8   |
| H4-C3          | 7  | 52  | 0  | 0  | 52  |
| H4-C3-O1       | 8  | 12  | 0  | 0  | 12  |
| H4-C3-O2       | 9  | 1   | 0  | 0  | 1   |
| H4-C4          | 8  | 119 | 0  | 0  | 119 |
| H4-C4-Fe16     | 24 | 0   | 0  | 15 | 15  |
| H4-C4-O2       | 10 | 6   | 0  | 0  | 6   |
| H4-C4-O3       | 11 | 2   | 0  | 0  | 2   |
| H4-C4-O4       | 12 | 4   | 0  | 0  | 4   |
| H4-C4-O4-Fe36  | 48 | 0   | 0  | 2  | 2   |
| H4-C4-O5       | 13 | 1   | 0  | 0  | 1   |
| H4-C5-O1-Fe14  | 24 | 0   | 0  | 1  | 1   |
| H4-C5-O2       | 11 | 3   | 0  | 0  | 3   |
| H4-C5-O3       | 12 | 21  | 0  | 0  | 21  |
| H4-C5-O4       | 13 | 26  | 0  | 0  | 26  |
| H4-C6-Fe14     | 24 | 0   | 0  | 13 | 13  |
| H4-C6-O1       | 11 | 7   | 0  | 0  | 7   |
| H4-C6-O2       | 12 | 22  | 0  | 0  | 22  |
| H4-C6-O3       | 13 | 46  | 0  | 0  | 46  |
| H4-C7          | 11 | 3   | 0  | 0  | 3   |
| H4-C7-O1       | 12 | 6   | 0  | 0  | 6   |
| H4-C7-O2       | 13 | 54  | 0  | 0  | 54  |
| H4-C8-Fe46     | 58 | 0   | 15 | 1  | 16  |
| H4-C8-O1       | 13 | 24  | 0  | 0  | 24  |
| H4-C8-O2-Fe30  | 44 | 0   | 47 | 0  | 47  |
| H4-C9          | 13 | 1   | 0  | 0  | 1   |
| H4-C9-O2-Fe26  | 41 | 0   | 53 | 0  | 53  |
| H4-C9-O2-Fe27  | 42 | 0   | 35 | 0  | 35  |
| H4-C10-O2-Fe30 | 46 | 0   | 19 | 0  | 19  |
| H4-C11-O2-Fe23 | 40 | 0   | 1  | 0  | 1   |

|                 |     |   |     |   |     |
|-----------------|-----|---|-----|---|-----|
| H4-C11-O2-Fe27  | 44  | 0 | 45  | 0 | 45  |
| H4-C11-O2-Fe29  | 46  | 0 | 38  | 0 | 38  |
| H4-C12-Fe24     | 40  | 0 | 130 | 0 | 130 |
| H4-C12-Fe28     | 44  | 0 | 50  | 0 | 50  |
| H4-C12-Fe30     | 46  | 0 | 13  | 0 | 13  |
| H4-C12-Fe34     | 50  | 0 | 40  | 0 | 40  |
| H4-C12-Fe36     | 52  | 0 | 36  | 2 | 38  |
| H4-C12-Fe40     | 56  | 0 | 48  | 2 | 50  |
| H4-C12-Fe42     | 58  | 0 | 39  | 0 | 39  |
| H4-C12-O1-Fe23  | 40  | 0 | 1   | 0 | 1   |
| H4-C12-O1-Fe27  | 44  | 0 | 1   | 0 | 1   |
| H4-C12-O2-Fe19  | 37  | 0 | 1   | 0 | 1   |
| H4-C12-O2-Fe26  | 44  | 0 | 1   | 0 | 1   |
| H4-C12-O2-Fe28  | 46  | 0 | 46  | 0 | 46  |
| H4-C12-O2-Fe29  | 47  | 0 | 37  | 0 | 37  |
| H4-C13-Fe20     | 37  | 0 | 26  | 0 | 26  |
| H4-C13-O2-Fe19  | 38  | 0 | 1   | 0 | 1   |
| H4-C13-O2-Fe25  | 44  | 0 | 1   | 0 | 1   |
| H4-C14-Fe20     | 38  | 0 | 19  | 0 | 19  |
| H4-C14-Fe26     | 44  | 0 | 53  | 2 | 55  |
| H4-C14-Fe40     | 58  | 0 | 69  | 0 | 69  |
| H4-C14-O1-Fe35  | 54  | 0 | 69  | 0 | 69  |
| H4-C15-O2-Fe19  | 40  | 0 | 1   | 0 | 1   |
| H4-C16-Fe19     | 39  | 0 | 22  | 0 | 22  |
| H4-C16-Fe20     | 40  | 0 | 34  | 2 | 36  |
| H4-C17-Fe19     | 40  | 0 | 42  | 0 | 42  |
| H4-C17-Fe23     | 44  | 0 | 161 | 1 | 162 |
| H4-C17-O1-Fe22  | 44  | 0 | 1   | 0 | 1   |
| H4-C17-O2-Fe21  | 44  | 0 | 1   | 0 | 1   |
| H4-C20-Fe31     | 55  | 0 | 12  | 4 | 16  |
| H4-C20-Fe32     | 56  | 0 | 6   | 0 | 6   |
| H4-C32-O1-Fe74  | 111 | 0 | 109 | 0 | 109 |
| H4-C33-O1-Fe64  | 102 | 0 | 18  | 0 | 18  |
| H4-C39-O1-Fe80  | 124 | 0 | 3   | 0 | 3   |
| H4-C40-Fe16     | 60  | 0 | 63  | 0 | 63  |
| H4-C41-O4-Fe80  | 129 | 0 | 28  | 0 | 28  |
| H4-C49-O1-Fe112 | 166 | 0 | 23  | 0 | 23  |
| H4-C50-Fe120    | 174 | 0 | 1   | 0 | 1   |
| H4-C50-O1-Fe112 | 167 | 0 | 7   | 0 | 7   |
| H4-C64-Fe148    | 216 | 0 | 4   | 0 | 4   |
| H4-C64-O2-Fe148 | 218 | 0 | 1   | 0 | 1   |
| H5-Fe16         | 21  | 0 | 10  | 0 | 10  |
| H5-Fe27         | 32  | 0 | 2   | 0 | 2   |
| H5-O2-Fe14      | 21  | 0 | 1   | 0 | 1   |
| H5-C1-O2-Fe35   | 43  | 0 | 16  | 4 | 20  |

|                 |     |     |     |     |     |
|-----------------|-----|-----|-----|-----|-----|
| H5-C1-O3-Fe36   | 45  | 0   | 2   | 0   | 2   |
| H5-C2-Fe21      | 28  | 0   | 0   | 11  | 11  |
| H5-C2-Fe36      | 43  | 0   | 18  | 0   | 18  |
| H5-C2-O2-Fe34   | 43  | 0   | 1   | 0   | 1   |
| H5-C3-O2-Fe18   | 28  | 0   | 0   | 1   | 1   |
| H5-C4-Fe19      | 28  | 0   | 0   | 33  | 33  |
| H5-C6-Fe20      | 31  | 0   | 0   | 6   | 6   |
| H5-C10-O1-Fe29  | 45  | 0   | 39  | 0   | 39  |
| H5-C11-O1-Fe29  | 46  | 0   | 34  | 0   | 34  |
| H5-C13-Fe35     | 53  | 0   | 151 | 0   | 151 |
| H5-C14-Fe36     | 55  | 0   | 161 | 0   | 161 |
| H5-C15-Fe20     | 40  | 0   | 24  | 0   | 24  |
| H5-C15-Fe35     | 55  | 0   | 92  | 0   | 92  |
| H5-C15-O1-Fe36  | 57  | 0   | 326 | 0   | 326 |
| H5-C15-O2-Fe18  | 40  | 0   | 1   | 0   | 1   |
| H5-C16-Fe36     | 57  | 0   | 119 | 0   | 119 |
| H5-C32-Fe74     | 111 | 0   | 90  | 0   | 90  |
| H5-C39-O1-Fe80  | 125 | 0   | 15  | 0   | 15  |
| H5-C41-O4-Fe80  | 130 | 0   | 46  | 0   | 46  |
| H5-C49-O1-Fe112 | 167 | 0   | 6   | 0   | 6   |
| H5-C50-Fe120    | 175 | 0   | 6   | 0   | 6   |
| H5-C50-O1-Fe112 | 168 | 0   | 24  | 0   | 24  |
| H6-Fe10         | 16  | 0   | 0   | 24  | 24  |
| H6-Fe15         | 21  | 0   | 9   | 0   | 9   |
| H6-Fe16         | 22  | 0   | 87  | 82  | 169 |
| H6-Fe25         | 31  | 0   | 54  | 130 | 184 |
| H6-Fe26         | 32  | 15  | 8   | 11  | 34  |
| H6-O1-Fe9       | 16  | 0   | 0   | 1   | 1   |
| H6-O1-Fe14      | 21  | 0   | 1   | 0   | 1   |
| H6-O1-Fe15      | 22  | 0   | 3   | 1   | 4   |
| H6-O1-Fe24      | 31  | 0   | 3   | 4   | 7   |
| H6-O1-Fe25      | 32  | 1   | 0   | 0   | 1   |
| H6-O2-Fe14      | 22  | 0   | 2   | 3   | 5   |
| H6-O2-Fe23      | 31  | 0   | 1   | 4   | 5   |
| H6-O2-Fe24      | 32  | 0   | 0   | 1   | 1   |
| H6-C1-O1-Fe33   | 41  | 0   | 7   | 0   | 7   |
| H6-C1-O1-Fe35   | 43  | 0   | 7   | 0   | 7   |
| H6-C1-O2-Fe36   | 45  | 0   | 1   | 0   | 1   |
| H6-C1-O3-Fe36   | 46  | 0   | 4   | 0   | 4   |
| H6-C2           | 8   | 292 | 0   | 0   | 292 |
| H6-C2-Fe36      | 44  | 0   | 27  | 0   | 27  |
| H6-C2-O1        | 9   | 23  | 16  | 20  | 59  |
| H6-C2-O2-Fe30   | 40  | 0   | 0   | 1   | 1   |
| H6-C2-O2-Fe31   | 41  | 0   | 6   | 3   | 9   |
| H6-C2-O2-Fe32   | 42  | 0   | 44  | 10  | 54  |

|                |     |     |     |   |     |
|----------------|-----|-----|-----|---|-----|
| H6-C2-O2-Fe34  | 44  | 0   | 1   | 0 | 1   |
| H6-C3          | 9   | 88  | 0   | 0 | 88  |
| H6-C3-O1       | 10  | 2   | 0   | 0 | 2   |
| H6-C3-O2       | 11  | 60  | 0   | 0 | 60  |
| H6-C4          | 10  | 29  | 0   | 0 | 29  |
| H6-C4-O2       | 12  | 1   | 0   | 0 | 1   |
| H6-C4-O3       | 13  | 5   | 0   | 0 | 5   |
| H6-C4-O4       | 14  | 3   | 0   | 0 | 3   |
| H6-C5-O2       | 13  | 18  | 0   | 0 | 18  |
| H6-C5-O3       | 14  | 40  | 0   | 0 | 40  |
| H6-C5-O4       | 15  | 51  | 0   | 0 | 51  |
| H6-C6          | 12  | 78  | 0   | 0 | 78  |
| H6-C6-O1       | 13  | 422 | 0   | 0 | 422 |
| H6-C6-O2       | 14  | 75  | 0   | 0 | 75  |
| H6-C6-O3       | 15  | 29  | 0   | 0 | 29  |
| H6-C7-O1       | 14  | 8   | 0   | 0 | 8   |
| H6-C7-O2       | 15  | 19  | 0   | 0 | 19  |
| H6-C7-O4       | 17  | 0   | 3   | 0 | 3   |
| H6-C8          | 14  | 3   | 0   | 0 | 3   |
| H6-C8-Fe48     | 62  | 0   | 22  | 0 | 22  |
| H6-C8-O1       | 15  | 7   | 0   | 0 | 7   |
| H6-C9          | 15  | 2   | 0   | 0 | 2   |
| H6-C12-Fe32    | 50  | 0   | 34  | 0 | 34  |
| H6-C12-O1-Fe23 | 42  | 0   | 1   | 0 | 1   |
| H6-C12-O1-Fe31 | 50  | 0   | 1   | 0 | 1   |
| H6-C12-O2-Fe30 | 50  | 0   | 1   | 0 | 1   |
| H6-C13-Fe23    | 42  | 0   | 66  | 0 | 66  |
| H6-C13-O1-Fe22 | 42  | 0   | 1   | 0 | 1   |
| H6-C13-O2-Fe21 | 42  | 0   | 2   | 0 | 2   |
| H6-C14-O1-Fe35 | 56  | 0   | 149 | 0 | 149 |
| H6-C16-O1-Fe27 | 50  | 0   | 2   | 0 | 2   |
| H6-C17-Fe27    | 50  | 0   | 123 | 0 | 123 |
| H6-C17-O2-Fe25 | 50  | 0   | 1   | 0 | 1   |
| H6-C21-Fe35    | 62  | 0   | 62  | 0 | 62  |
| H6-C26-O4-Fe72 | 108 | 0   | 3   | 0 | 3   |
| H6-C28-O4-Fe72 | 110 | 0   | 2   | 0 | 2   |
| H6-C32-Fe72    | 110 | 0   | 1   | 0 | 1   |
| H6-C37-O1-Fe80 | 124 | 0   | 3   | 0 | 3   |
| H6-C41-O4-Fe80 | 131 | 0   | 4   | 0 | 4   |
| H7-Fe16        | 23  | 0   | 0   | 1 | 1   |
| H7-Fe25        | 32  | 0   | 0   | 6 | 6   |
| H7-O2-Fe23     | 32  | 0   | 0   | 1 | 1   |
| H7-C1-O4-Fe34  | 46  | 0   | 1   | 1 | 2   |
| H7-C2-Fe29     | 38  | 0   | 32  | 0 | 32  |
| H7-C2-Fe35     | 44  | 0   | 11  | 0 | 11  |



|                |     |     |     |     |     |
|----------------|-----|-----|-----|-----|-----|
| H7-C2-Fe36     | 45  | 0   | 36  | 0   | 36  |
| H7-C2-O2-Fe27  | 38  | 0   | 1   | 0   | 1   |
| H7-C2-O2-Fe31  | 42  | 0   | 14  | 6   | 20  |
| H7-C2-O2-Fe32  | 43  | 0   | 12  | 3   | 15  |
| H7-C2-O2-Fe34  | 45  | 0   | 1   | 0   | 1   |
| H7-C2-O2-Fe36  | 47  | 0   | 7   | 0   | 7   |
| H7-C2-O5-Fe34  | 48  | 0   | 0   | 5   | 5   |
| H7-C10-Fe36    | 53  | 0   | 77  | 0   | 77  |
| H7-C14-Fe30    | 51  | 0   | 44  | 1   | 45  |
| H7-C14-Fe35    | 56  | 0   | 314 | 0   | 314 |
| H7-C15-Fe35    | 57  | 0   | 247 | 0   | 247 |
| H7-C16-Fe34    | 57  | 0   | 39  | 0   | 39  |
| H7-C23-Fe47    | 77  | 0   | 14  | 1   | 15  |
| H7-C37-O1-Fe80 | 125 | 0   | 1   | 0   | 1   |
| H8-Fe8         | 16  | 208 | 0   | 113 | 321 |
| H8-Fe16        | 24  | 0   | 1   | 0   | 1   |
| H8-Fe20        | 28  | 0   | 2   | 0   | 2   |
| H8-O1-Fe7      | 16  | 9   | 0   | 5   | 14  |
| H8-O2-Fe6      | 16  | 4   | 0   | 3   | 7   |
| H8-C1-Fe27     | 36  | 0   | 70  | 1   | 71  |
| H8-C1-O5-Fe36  | 50  | 0   | 1   | 1   | 2   |
| H8-C2          | 10  | 0   | 1   | 0   | 1   |
| H8-C2-O2       | 12  | 0   | 7   | 0   | 7   |
| H8-C2-O2-Fe32  | 44  | 0   | 3   | 1   | 4   |
| H8-C2-O2-Fe36  | 48  | 0   | 4   | 0   | 4   |
| H8-C2-O3       | 13  | 0   | 6   | 0   | 6   |
| H8-C2-O4-Fe34  | 48  | 0   | 5   | 1   | 6   |
| H8-C2-O4-Fe35  | 49  | 0   | 2   | 0   | 2   |
| H8-C2-O4-Fe36  | 50  | 0   | 7   | 0   | 7   |
| H8-C3          | 11  | 4   | 0   | 0   | 4   |
| H8-C3-O1-Fe36  | 48  | 0   | 6   | 0   | 6   |
| H8-C3-O3       | 14  | 2   | 0   | 0   | 2   |
| H8-C4-O1       | 13  | 4   | 0   | 0   | 4   |
| H8-C5-O1       | 14  | 166 | 0   | 0   | 166 |
| H8-C5-O3       | 16  | 10  | 0   | 0   | 10  |
| H8-C5-O4       | 17  | 13  | 0   | 0   | 13  |
| H8-C6-O1       | 15  | 8   | 0   | 0   | 8   |
| H8-C6-O2       | 16  | 10  | 0   | 0   | 10  |
| H8-C6-O3       | 17  | 27  | 0   | 0   | 27  |
| H8-C7          | 15  | 3   | 0   | 0   | 3   |
| H8-C7-Fe21     | 36  | 0   | 10  | 0   | 10  |
| H8-C7-O1       | 16  | 11  | 0   | 0   | 11  |
| H8-C7-O2       | 17  | 56  | 0   | 0   | 56  |
| H8-C7-O3       | 18  | 0   | 3   | 4   | 7   |
| H8-C8          | 16  | 6   | 0   | 0   | 6   |

|                |     |     |    |    |     |
|----------------|-----|-----|----|----|-----|
| H8-C8-Fe42     | 58  | 0   | 25 | 0  | 25  |
| H8-C8-O1       | 17  | 53  | 0  | 0  | 53  |
| H8-C8-O2       | 18  | 2   | 0  | 0  | 2   |
| H8-C8-O3       | 19  | 0   | 6  | 2  | 8   |
| H8-C9          | 17  | 19  | 0  | 0  | 19  |
| H8-C9-O3       | 20  | 73  | 0  | 0  | 73  |
| H8-C12-O1-Fe23 | 44  | 0   | 1  | 0  | 1   |
| H8-C12-O6      | 26  | 0   | 2  | 0  | 2   |
| H8-C13-Fe23    | 44  | 0   | 85 | 1  | 86  |
| H8-C13-O1-Fe22 | 44  | 0   | 1  | 0  | 1   |
| H8-C16-Fe38    | 62  | 0   | 37 | 0  | 37  |
| H8-C19-Fe35    | 62  | 0   | 96 | 0  | 96  |
| H8-C28-O2-Fe70 | 108 | 0   | 2  | 0  | 2   |
| H8-C37-Fe80    | 125 | 0   | 5  | 0  | 5   |
| H8-C37-O1-Fe80 | 126 | 0   | 19 | 0  | 19  |
| H8-C38-O1-Fe80 | 127 | 0   | 9  | 0  | 9   |
| H9-Fe23        | 32  | 12  | 0  | 0  | 12  |
| H9-C2-Fe16     | 27  | 0   | 2  | 0  | 2   |
| H9-C2-O1-Fe34  | 46  | 0   | 1  | 0  | 1   |
| H9-C2-O1-Fe35  | 47  | 0   | 0  | 2  | 2   |
| H9-C2-O1-Fe36  | 48  | 0   | 7  | 0  | 7   |
| H9-C3-O1-Fe35  | 48  | 0   | 3  | 0  | 3   |
| H9-C9-O1       | 19  | 210 | 0  | 0  | 210 |
| H9-C12-Fe30    | 51  | 0   | 38 | 0  | 38  |
| H9-C13-Fe17    | 39  | 0   | 28 | 1  | 29  |
| H9-C16-O2-Fe23 | 50  | 0   | 2  | 0  | 2   |
| H9-C17-Fe24    | 50  | 0   | 55 | 2  | 57  |
| H9-C17-O1-Fe23 | 50  | 0   | 0  | 1  | 1   |
| H9-C17-O2-Fe22 | 50  | 0   | 1  | 0  | 1   |
| H9-C22-Fe46    | 77  | 0   | 7  | 2  | 9   |
| H9-C30-Fe70    | 109 | 0   | 2  | 0  | 2   |
| H9-C37-O1-Fe80 | 127 | 0   | 28 | 0  | 28  |
| H9-C38-O1-Fe80 | 128 | 0   | 21 | 0  | 21  |
| H10-Fe21       | 31  | 0   | 8  | 13 | 21  |
| H10-Fe22       | 32  | 0   | 11 | 17 | 28  |
| H10-O1-Fe20    | 31  | 0   | 0  | 1  | 1   |
| H10-O1-Fe21    | 32  | 0   | 1  | 1  | 2   |
| H10-C4-O3      | 17  | 0   | 7  | 0  | 7   |
| H10-C5-O4      | 19  | 3   | 0  | 0  | 3   |
| H10-C5-O5      | 20  | 3   | 0  | 0  | 3   |
| H10-C6         | 16  | 26  | 0  | 0  | 26  |
| H10-C6-O1      | 17  | 3   | 0  | 0  | 3   |
| H10-C6-O2      | 18  | 7   | 0  | 0  | 7   |
| H10-C6-O3      | 19  | 10  | 0  | 0  | 10  |
| H10-C7         | 17  | 3   | 0  | 0  | 3   |

|                 |     |      |     |    |      |
|-----------------|-----|------|-----|----|------|
| H10-C7-O1       | 18  | 52   | 0   | 0  | 52   |
| H10-C7-O2       | 19  | 34   | 0   | 0  | 34   |
| H10-C7-O3       | 20  | 0    | 1   | 0  | 1    |
| H10-C8          | 18  | 12   | 0   | 0  | 12   |
| H10-C8-O1       | 19  | 36   | 0   | 0  | 36   |
| H10-C8-O2       | 20  | 0    | 12  | 1  | 13   |
| H10-C8-O3       | 21  | 0    | 1   | 1  | 2    |
| H10-C9          | 19  | 65   | 0   | 0  | 65   |
| H10-C9-O2       | 21  | 0    | 5   | 3  | 8    |
| H10-C10-O1      | 21  | 0    | 3   | 1  | 4    |
| H10-C12-O6      | 28  | 0    | 2   | 1  | 3    |
| H10-C13-O5      | 28  | 0    | 6   | 7  | 13   |
| H10-C26-Fe70    | 106 | 0    | 1   | 0  | 1    |
| H10-C28-Fe72    | 110 | 0    | 1   | 0  | 1    |
| H10-C30-Fe70    | 110 | 0    | 2   | 0  | 2    |
| H10-C37-O1-Fe80 | 128 | 0    | 11  | 0  | 11   |
| H10-C38-O1-Fe80 | 129 | 0    | 28  | 0  | 28   |
| H10-C38-O2-Fe80 | 130 | 0    | 5   | 0  | 5    |
| H11-Fe5         | 16  | 0    | 1   | 87 | 88   |
| H11-Fe16        | 27  | 0    | 0   | 1  | 1    |
| H11-Fe21        | 32  | 0    | 0   | 14 | 14   |
| H11-O1-Fe4      | 16  | 0    | 0   | 2  | 2    |
| H11-O1-Fe20     | 32  | 0    | 0   | 1  | 1    |
| H11-C38-O1-Fe80 | 130 | 0    | 3   | 0  | 3    |
| H12-Fe19        | 31  | 0    | 0   | 40 | 40   |
| H12-Fe32        | 44  | 0    | 26  | 1  | 27   |
| H12-O2-Fe17     | 31  | 0    | 0   | 1  | 1    |
| H12-C1-Fe31     | 44  | 0    | 105 | 1  | 106  |
| H12-C1-O1-Fe30  | 44  | 0    | 1   | 0  | 1    |
| H12-C1-O2-Fe29  | 44  | 0    | 3   | 0  | 3    |
| H12-C3-O6       | 21  | 0    | 20  | 63 | 83   |
| H12-C4-O1       | 17  | 1    | 0   | 0  | 1    |
| H12-C4-O2       | 18  | 7    | 0   | 0  | 7    |
| H12-C4-O2-Fe19  | 37  | 0    | 1   | 0  | 1    |
| H12-C5-Fe20     | 37  | 0    | 18  | 2  | 20   |
| H12-C6-O3       | 21  | 0    | 0   | 1  | 1    |
| H12-C6-O6       | 24  | 5231 | 70  | 56 | 5357 |
| H12-C7          | 19  | 8    | 0   | 0  | 8    |
| H12-C7-O1       | 20  | 27   | 0   | 0  | 27   |
| H12-C7-O2       | 21  | 46   | 0   | 0  | 46   |
| H12-C7-O3       | 22  | 0    | 1   | 1  | 2    |
| H12-C8          | 20  | 10   | 0   | 0  | 10   |
| H12-C8-O1       | 21  | 28   | 0   | 0  | 28   |
| H12-C8-O2-Fe15  | 37  | 0    | 1   | 0  | 1    |
| H12-C8-O3       | 23  | 0    | 3   | 1  | 4    |

|                 |    |    |     |     |     |
|-----------------|----|----|-----|-----|-----|
| H12-C9          | 21 | 45 | 0   | 0   | 45  |
| H12-C9-O1       | 22 | 0  | 7   | 2   | 9   |
| H12-C10         | 22 | 0  | 4   | 1   | 5   |
| H12-C10-Fe15    | 37 | 0  | 18  | 0   | 18  |
| H12-C10-O1-Fe14 | 37 | 0  | 3   | 0   | 3   |
| H12-C12-O4      | 28 | 0  | 0   | 2   | 2   |
| H12-C12-O6      | 30 | 0  | 2   | 0   | 2   |
| H12-C13-O5      | 30 | 0  | 5   | 6   | 11  |
| H12-C14-O4      | 30 | 0  | 16  | 5   | 21  |
| H12-C15-Fe35    | 62 | 0  | 55  | 0   | 55  |
| H12-C15-O3      | 30 | 0  | 7   | 1   | 8   |
| H12-C24-Fe39    | 75 | 0  | 22  | 0   | 22  |
| H13-Fe16        | 29 | 0  | 167 | 221 | 388 |
| H13-Fe19        | 32 | 0  | 0   | 5   | 5   |
| H13-O1-Fe15     | 29 | 0  | 5   | 5   | 10  |
| H13-O2-Fe14     | 29 | 0  | 1   | 7   | 8   |
| H13-C2-Fe16     | 31 | 0  | 10  | 0   | 10  |
| H13-C2-O1-Fe15  | 31 | 0  | 1   | 0   | 1   |
| H13-C5-Fe22     | 40 | 0  | 6   | 0   | 6   |
| H13-C17-Fe25    | 55 | 0  | 46  | 1   | 47  |
| H14-Fe16        | 30 | 0  | 0   | 10  | 10  |
| H14-Fe17        | 31 | 0  | 0   | 8   | 8   |
| H14-Fe18        | 32 | 0  | 0   | 8   | 8   |
| H14-O2-Fe14     | 30 | 0  | 0   | 1   | 1   |
| H14-O2-Fe20     | 36 | 0  | 0   | 1   | 1   |
| H14-O7          | 21 | 0  | 1   | 756 | 757 |
| H14-C1-Fe21     | 36 | 0  | 0   | 14  | 14  |
| H14-C1-O2-Fe19  | 36 | 0  | 0   | 1   | 1   |
| H14-C2-Fe20     | 36 | 0  | 0   | 36  | 36  |
| H14-C2-Fe40     | 56 | 0  | 1   | 0   | 1   |
| H14-C2-O2-Fe18  | 36 | 0  | 0   | 2   | 2   |
| H14-C4-O4       | 22 | 0  | 8   | 0   | 8   |
| H14-C7-O3       | 24 | 0  | 1   | 0   | 1   |
| H14-C8          | 22 | 2  | 0   | 0   | 2   |
| H14-C8-O1       | 23 | 1  | 0   | 0   | 1   |
| H14-C8-O2       | 24 | 0  | 3   | 1   | 4   |
| H14-C8-O3       | 25 | 0  | 1   | 0   | 1   |
| H14-C9          | 23 | 54 | 0   | 0   | 54  |
| H14-C10-O4      | 28 | 0  | 1   | 0   | 1   |
| H14-C12-O6      | 32 | 0  | 4   | 0   | 4   |
| H14-C13-O5      | 32 | 0  | 7   | 1   | 8   |
| H14-C14-O4      | 32 | 0  | 2   | 2   | 4   |
| H14-C15-O3      | 32 | 0  | 7   | 14  | 21  |
| H14-C16-O2      | 32 | 0  | 5   | 6   | 11  |
| H15-Fe6         | 21 | 0  | 33  | 0   | 33  |

|                 |    |    |    |      |      |
|-----------------|----|----|----|------|------|
| H15-Fe16        | 31 | 0  | 0  | 9    | 9    |
| H15-Fe17        | 32 | 0  | 0  | 19   | 19   |
| H15-O1-Fe5      | 21 | 0  | 1  | 0    | 1    |
| H15-O1-Fe15     | 31 | 0  | 0  | 1    | 1    |
| H15-O1-Fe16     | 32 | 0  | 0  | 2    | 2    |
| H15-C1-Fe16     | 32 | 0  | 0  | 5    | 5    |
| H15-C1-O2-Fe20  | 38 | 0  | 0  | 1    | 1    |
| H15-C2-Fe21     | 38 | 0  | 0  | 17   | 17   |
| H15-C2-O2-Fe19  | 38 | 0  | 0  | 1    | 1    |
| H15-C4-Fe19     | 38 | 0  | 0  | 24   | 24   |
| H15-C4-O2-Fe17  | 38 | 0  | 0  | 1    | 1    |
| H15-C9-O2-Fe14  | 40 | 0  | 1  | 0    | 1    |
| H15-C11-Fe14    | 40 | 0  | 40 | 1    | 41   |
| H15-C11-O2-Fe12 | 40 | 0  | 1  | 1    | 2    |
| H16-Fe5         | 21 | 0  | 44 | 1    | 45   |
| H16-Fe16        | 32 | 0  | 1  | 44   | 45   |
| H16-O1-Fe15     | 32 | 0  | 0  | 1    | 1    |
| H16-O2-Fe3      | 21 | 0  | 2  | 0    | 2    |
| H16-O2-Fe14     | 32 | 0  | 0  | 5    | 5    |
| H16-O8          | 24 | 0  | 14 | 3911 | 3925 |
| H16-C2-Fe16     | 34 | 0  | 21 | 0    | 21   |
| H16-C2-Fe20     | 38 | 0  | 26 | 0    | 26   |
| H16-C2-O1-Fe15  | 34 | 0  | 1  | 0    | 1    |
| H16-C2-O1-Fe19  | 38 | 0  | 1  | 0    | 1    |
| H16-C4-Fe20     | 40 | 0  | 10 | 0    | 10   |
| H16-C4-O2-Fe18  | 40 | 0  | 1  | 0    | 1    |
| H16-C7-O1       | 24 | 1  | 0  | 0    | 1    |
| H16-C8-O1       | 25 | 38 | 0  | 0    | 38   |
| H16-C8-O2       | 26 | 0  | 5  | 0    | 5    |
| H16-C9          | 25 | 18 | 0  | 0    | 18   |
| H16-C10         | 26 | 2  | 0  | 0    | 2    |
| H16-C10-O1      | 27 | 0  | 2  | 0    | 2    |
| H16-C13-O5      | 34 | 0  | 13 | 1    | 14   |
| H16-C14-O4      | 34 | 0  | 18 | 4    | 22   |
| H16-C16-O2      | 34 | 0  | 2  | 3    | 5    |
| H16-C17-O1      | 34 | 0  | 6  | 3    | 9    |
| H16-C18         | 34 | 0  | 3  | 0    | 3    |
| H17-Fe15        | 32 | 0  | 0  | 9    | 9    |
| H17-C1-Fe26     | 44 | 0  | 51 | 0    | 51   |
| H17-C1-O1-Fe25  | 44 | 0  | 1  | 0    | 1    |
| H17-C1-O2-Fe24  | 44 | 0  | 3  | 0    | 3    |
| H17-C2-Fe16     | 35 | 0  | 19 | 0    | 19   |
| H17-C2-O1-Fe20  | 40 | 0  | 1  | 0    | 1    |
| H17-C2-O2-Fe14  | 35 | 0  | 1  | 0    | 1    |
| H17-C3-Fe20     | 40 | 0  | 15 | 0    | 15   |

|                |    |   |     |    |     |
|----------------|----|---|-----|----|-----|
| H17-C4-Fe21    | 42 | 0 | 0   | 24 | 24  |
| H17-C5-Fe24    | 46 | 0 | 7   | 0  | 7   |
| H18-Fe13       | 31 | 0 | 0   | 4  | 4   |
| H18-C1-Fe11    | 30 | 0 | 74  | 18 | 92  |
| H18-C1-Fe21    | 40 | 0 | 0   | 30 | 30  |
| H18-C1-O1-Fe10 | 30 | 0 | 3   | 1  | 4   |
| H18-C1-O2-Fe9  | 30 | 0 | 0   | 1  | 1   |
| H18-C2-Fe16    | 36 | 0 | 30  | 0  | 30  |
| H18-C2-Fe20    | 40 | 0 | 19  | 0  | 19  |
| H18-C2-Fe26    | 46 | 0 | 4   | 0  | 4   |
| H18-C2-O1-Fe15 | 36 | 0 | 1   | 0  | 1   |
| H18-C2-O2-Fe14 | 36 | 0 | 1   | 0  | 1   |
| H18-C9         | 27 | 1 | 0   | 0  | 1   |
| H18-C9-O5      | 32 | 0 | 1   | 0  | 1   |
| H18-C10        | 28 | 0 | 3   | 0  | 3   |
| H18-C13-O5     | 36 | 0 | 3   | 0  | 3   |
| H18-C14-O4     | 36 | 0 | 10  | 2  | 12  |
| H18-C15-O3     | 36 | 0 | 21  | 3  | 24  |
| H18-C16-O2     | 36 | 0 | 4   | 1  | 5   |
| H19-Fe12       | 31 | 0 | 145 | 3  | 148 |
| H19-Fe13       | 32 | 0 | 0   | 3  | 3   |
| H19-Fe21       | 40 | 0 | 0   | 19 | 19  |
| H19-O1-Fe11    | 31 | 0 | 6   | 0  | 6   |
| H19-O2-Fe10    | 31 | 0 | 4   | 0  | 4   |
| H19-C2-Fe20    | 41 | 0 | 8   | 0  | 8   |
| H19-C2-Fe21    | 42 | 0 | 0   | 16 | 16  |
| H19-C2-O2-Fe19 | 42 | 0 | 0   | 1  | 1   |
| H20-C2-Fe67    | 89 | 0 | 1   | 0  | 1   |
| H20-C13-O5     | 38 | 0 | 1   | 0  | 1   |
| H20-C14-O4     | 38 | 0 | 2   | 0  | 2   |
| H20-C15-O3     | 38 | 0 | 4   | 1  | 5   |
| H20-C16-O2     | 38 | 0 | 19  | 0  | 19  |
| H22-C14-O4     | 40 | 0 | 1   | 2  | 3   |
| H22-C17-O1     | 40 | 0 | 4   | 2  | 6   |
| H22-C18        | 40 | 0 | 7   | 2  | 9   |
| H23-Fe8        | 31 | 0 | 10  | 4  | 14  |
| H23-Fe9        | 32 | 0 | 15  | 8  | 23  |
| H23-O1-Fe7     | 31 | 0 | 1   | 0  | 1   |
| H23-O1-Fe8     | 32 | 0 | 1   | 0  | 1   |
| H24-Fe8        | 32 | 0 | 0   | 2  | 2   |
| H24-C2-Fe20    | 46 | 0 | 34  | 0  | 34  |
| H24-C2-O1-Fe19 | 46 | 0 | 2   | 0  | 2   |
| H24-C2-O2-Fe18 | 46 | 0 | 1   | 0  | 1   |
| H24-C12-O12    | 48 | 1 | 0   | 0  | 1   |
| H24-C16-O2     | 42 | 0 | 5   | 0  | 5   |

|              |     |      |       |       |       |
|--------------|-----|------|-------|-------|-------|
| H26-C2-Fe40  | 68  | 0    | 6     | 0     | 6     |
| H27-C2-Fe35  | 64  | 0    | 17    | 0     | 17    |
| H27-C2-Fe36  | 65  | 0    | 21    | 0     | 21    |
| H27-C2-Fe58  | 87  | 0    | 0     | 3     | 3     |
| H29-C2-Fe39  | 70  | 0    | 2     | 0     | 2     |
| H30-O15      | 45  | 124  | 4     | 94    | 222   |
| H33-C2-Fe40  | 75  | 0    | 7     | 0     | 7     |
| H34-C6-Fe40  | 80  | 0    | 2     | 0     | 2     |
| H34-C10-Fe48 | 92  | 0    | 1     | 0     | 1     |
| H35-C2-Fe30  | 67  | 0    | 1     | 0     | 1     |
| H37-C2-Fe30  | 69  | 0    | 1     | 0     | 1     |
| H38-C2-Fe45  | 85  | 0    | 3     | 0     | 3     |
| H40-C2-Fe45  | 87  | 0    | 2     | 0     | 2     |
| H41-C2-Fe39  | 82  | 0    | 18    | 0     | 18    |
| H42-C2-Fe40  | 84  | 0    | 36    | 0     | 36    |
| H44-C2-Fe39  | 85  | 0    | 2     | 0     | 2     |
| H45-C2-Fe40  | 87  | 0    | 33    | 2     | 35    |
| H46-C2-Fe40  | 88  | 0    | 5     | 0     | 5     |
| H47-C2-Fe40  | 89  | 0    | 26    | 0     | 26    |
| H48-C2-Fe40  | 90  | 0    | 4     | 0     | 4     |
| H50-C2-Fe48  | 100 | 0    | 4     | 0     | 4     |
| H52-C2-Fe48  | 102 | 0    | 5     | 0     | 5     |
| total        | --  | 9564 | 17506 | 11685 | 38755 |

---

## Benchmark of G-NN potential against DFT calculations

**Table S2.** Benchmark of NN calculations for FeC<sub>x</sub> systems against DFT results. Listed data includes total atom number per cell ( $N_{\text{atom}}$ ), DFT total energy ( $E_{\text{DFT}}$ ), NN total energy ( $E_{\text{NN}}$ ) and energy differences between DFT total energy and NN total energy ( $E_{\text{diff}}$ , meV/atom).

|                                                          | $N_{\text{atom}}$ | $E_{\text{DFT}}$ (eV) | $E_{\text{NN}}$ (eV) | $E_{\text{diff}}$<br>(meV/atom) |
|----------------------------------------------------------|-------------------|-----------------------|----------------------|---------------------------------|
| Surface                                                  |                   |                       |                      |                                 |
| 1                                                        | 124               | -1030.65              | -1030.76             | -0.95                           |
| 2                                                        | 328               | -2702.38              | -2702.30             | 0.23                            |
| 3                                                        | 116               | -954.97               | -954.96              | 0.15                            |
| 4                                                        | 116               | -953.89               | -953.84              | 0.40                            |
| 5                                                        | 200               | -1656.32              | -1655.92             | 2.01                            |
| 6                                                        | 136               | -1118.18              | -1118.09             | 0.66                            |
| 7                                                        | 136               | -1116.39              | -1116.27             | 0.86                            |
| 8                                                        | 140               | -1144.81              | -1144.67             | 1.01                            |
| 9                                                        | 113               | -928.01               | -927.90              | 0.98                            |
| TS sampling for CO dissociation                          |                   |                       |                      |                                 |
| 10                                                       | 126               | -1044.76              | -1044.66             | 0.76                            |
| 11                                                       | 125               | -1036.61              | -1036.56             | 0.38                            |
| 12                                                       | 125               | -1036.64              | -1036.63             | 0.11                            |
| 13                                                       | 117               | -961.19               | -961.15              | 0.28                            |
| 14                                                       | 117               | -961.18               | -961.16              | 0.11                            |
| 15                                                       | 118               | -969.57               | -969.62              | -0.39                           |
| 16                                                       | 118               | -968.36               | -968.26              | 0.83                            |
| 17                                                       | 117               | -960.09               | -960.04              | 0.36                            |
| 18                                                       | 117               | -959.94               | -960.27              | -2.77                           |
| 19                                                       | 117               | -959.98               | -960.10              | -0.95                           |
| 20                                                       | 202               | -1670.95              | -1670.39             | 2.81                            |
| 21                                                       | 201               | -1662.79              | -1662.50             | 1.47                            |
| 22                                                       | 201               | -1662.79              | -1662.28             | 2.55                            |
| 23                                                       | 138               | -1132.78              | -1132.77             | 0.09                            |
| 24                                                       | 137               | -1124.35              | -1124.29             | 0.42                            |
| 25                                                       | 138               | -1131.39              | -1131.23             | 1.14                            |
| 26                                                       | 137               | -1122.98              | -1122.82             | 1.15                            |
| 27                                                       | 142               | -1160.16              | -1159.80             | 2.53                            |
| 28                                                       | 141               | -1151.30              | -1151.19             | 0.73                            |
| 29                                                       | 115               | -943.03               | -942.69              | 2.88                            |
| 30                                                       | 114               | -934.13               | -934.12              | 0.06                            |
| 31                                                       | 114               | -934.46               | -934.12              | 2.92                            |
| 32                                                       | 114               | -934.57               | -934.24              | 2.88                            |
| 33                                                       | 114               | -934.14               | -934.00              | 1.22                            |
| 34                                                       | 114               | -934.14               | -933.92              | 1.96                            |
| Overall reaction on Fe <sub>5</sub> C <sub>2</sub> (510) |                   |                       |                      |                                 |
| 35                                                       | 125               | -1025.92              | -1025.86             | 0.44                            |
| 36                                                       | 125               | -1025.01              | -1024.86             | 1.21                            |



|    |     |          |          |       |
|----|-----|----------|----------|-------|
| 37 | 125 | -1025.78 | -1025.71 | 0.56  |
| 38 | 125 | -1024.99 | -1024.93 | 0.48  |
| 39 | 125 | -1025.26 | -1025.34 | -0.67 |
| 40 | 127 | -1041.76 | -1041.45 | 2.42  |
| 41 | 127 | -1041.70 | -1041.56 | 1.09  |
| 42 | 127 | -1040.57 | -1040.49 | 0.59  |
| 43 | 127 | -1041.90 | -1041.87 | 0.23  |
| 44 | 127 | -1038.43 | -1038.38 | 0.44  |
| 45 | 127 | -1038.32 | -1038.26 | 0.51  |
| 46 | 127 | -1037.95 | -1037.89 | 0.49  |
| 47 | 127 | -1038.68 | -1038.49 | 1.49  |
| 48 | 127 | -1037.97 | -1037.74 | 1.81  |
| 49 | 127 | -1038.18 | -1038.00 | 1.42  |
| 50 | 128 | -1042.22 | -1041.83 | 3.05  |
| 51 | 128 | -1041.78 | -1041.45 | 2.61  |
| 52 | 128 | -1042.36 | -1042.24 | 0.96  |
| 53 | 128 | -1041.79 | -1041.71 | 0.66  |
| 54 | 128 | -1042.03 | -1042.06 | -0.23 |
| 55 | 130 | -1055.22 | -1054.98 | 1.83  |
| 56 | 130 | -1054.67 | -1054.42 | 1.95  |
| 57 | 130 | -1055.31 | -1054.92 | 2.98  |
| 58 | 131 | -1058.93 | -1058.69 | 1.86  |
| 59 | 131 | -1058.39 | -1058.33 | 0.42  |
| 60 | 131 | -1058.73 | -1058.52 | 1.57  |
| 61 | 128 | -1041.46 | -1041.07 | 3.04  |
| 62 | 128 | -1041.47 | -1041.17 | 2.30  |
| 63 | 129 | -1045.29 | -1045.08 | 1.65  |
| 64 | 129 | -1045.06 | -1044.97 | 0.67  |
| 65 | 129 | -1045.74 | -1045.53 | 1.67  |
| 66 | 129 | -1045.40 | -1045.19 | 1.61  |
| 67 | 129 | -1045.08 | -1044.81 | 2.09  |
| 68 | 129 | -1045.57 | -1045.32 | 1.93  |
| 69 | 130 | -1049.50 | -1049.23 | 2.06  |
| 70 | 127 | -1038.43 | -1038.38 | 0.44  |
| 71 | 127 | -1037.86 | -1037.79 | 0.60  |
| 72 | 127 | -1037.81 | -1037.79 | 0.15  |
| 73 | 127 | -1038.06 | -1038.01 | 0.41  |
| 74 | 128 | -1042.00 | -1041.94 | 0.42  |
| 75 | 128 | -1041.42 | -1041.40 | 0.21  |
| 76 | 128 | -1041.36 | -1041.39 | -0.28 |
| 77 | 128 | -1041.87 | -1041.92 | -0.34 |
| 78 | 129 | -1045.81 | -1045.82 | -0.03 |
| 79 | 129 | -1044.91 | -1044.94 | -0.20 |
| 80 | 130 | -1049.95 | -1049.90 | 0.42  |
| 81 | 126 | -1033.30 | -1033.28 | 0.18  |

|     |     |          |          |       |
|-----|-----|----------|----------|-------|
| 82  | 127 | -1036.81 | -1036.73 | 0.60  |
| 83  | 127 | -1035.75 | -1035.77 | -0.15 |
| 84  | 127 | -1036.97 | -1036.89 | 0.67  |
| 85  | 127 | -1037.05 | -1037.02 | 0.17  |
| 86  | 127 | -1035.72 | -1035.53 | 1.52  |
| 87  | 127 | -1036.96 | -1036.89 | 0.60  |
| 88  | 128 | -1040.38 | -1040.40 | -0.11 |
| 89  | 128 | -1039.68 | -1039.71 | -0.22 |
| 90  | 128 | -1040.84 | -1040.76 | 0.64  |
| 91  | 129 | -1047.63 | -1047.56 | 0.54  |
| 92  | 129 | -1047.52 | -1047.47 | 0.32  |
| 93  | 129 | -1047.52 | -1047.50 | 0.11  |
| 94  | 129 | -1048.02 | -1047.99 | 0.23  |
| 95  | 128 | -1049.42 | -1049.20 | 1.79  |
| 96  | 128 | -1049.12 | -1048.84 | 2.20  |
| 97  | 128 | -1048.24 | -1048.26 | -0.18 |
| 98  | 128 | -1048.45 | -1048.38 | 0.55  |
| 99  | 129 | -1053.03 | -1052.97 | 0.45  |
| 100 | 129 | -1052.83 | -1052.79 | 0.36  |
| 101 | 129 | -1052.04 | -1052.01 | 0.19  |
| 102 | 129 | -1052.18 | -1052.08 | 0.71  |
| 103 | 129 | -1052.63 | -1052.57 | 0.45  |
| 104 | 129 | -1051.77 | -1051.85 | -0.66 |
| 105 | 129 | -1052.16 | -1052.09 | 0.53  |
| 106 | 129 | -1052.00 | -1051.94 | 0.45  |
| 107 | 129 | -1051.34 | -1051.33 | 0.08  |
| 108 | 129 | -1052.28 | -1052.21 | 0.54  |
| 109 | 128 | -1042.07 | -1041.98 | 0.67  |
| 110 | 128 | -1041.21 | -1041.12 | 0.66  |
| 111 | 129 | -1046.06 | -1046.00 | 0.46  |
| 112 | 129 | -1044.94 | -1044.99 | -0.44 |
| 113 | 128 | -1042.06 | -1042.04 | 0.16  |
| 114 | 128 | -1041.75 | -1041.86 | -0.81 |
| 115 | 128 | -1042.13 | -1042.17 | -0.30 |
| 116 | 129 | -1044.94 | -1044.93 | 0.07  |
| 117 | 129 | -1045.70 | -1045.70 | -0.05 |
| 118 | 130 | -1049.72 | -1049.65 | 0.55  |
| 119 | 130 | -1049.56 | -1049.56 | -0.04 |
| 120 | 130 | -1048.34 | -1048.45 | -0.85 |
| 121 | 130 | -1048.90 | -1048.75 | 1.13  |
| 122 | 130 | -1048.36 | -1048.30 | 0.50  |
| 123 | 131 | -1052.75 | -1052.63 | 0.93  |
| 124 | 131 | -1052.48 | -1052.28 | 1.54  |
| 125 | 131 | -1052.16 | -1052.24 | -0.66 |
| 126 | 125 | -1024.58 | -1024.64 | -0.46 |

|           |     |          |          |       |
|-----------|-----|----------|----------|-------|
| 127       | 127 | -1037.48 | -1037.50 | -0.20 |
| 128       | 128 | -1041.03 | -1040.97 | 0.42  |
| 129       | 129 | -1045.54 | -1045.64 | -0.75 |
| 130       | 129 | -1044.61 | -1044.54 | 0.54  |
| 131       | 126 | -1029.71 | -1029.65 | 0.50  |
| 132       | 126 | -1028.84 | -1028.71 | 1.02  |
| 133       | 126 | -1029.02 | -1028.92 | 0.81  |
| 134       | 127 | -1032.87 | -1032.71 | 1.23  |
| 135       | 127 | -1032.04 | -1031.88 | 1.21  |
| 136       | 127 | -1032.60 | -1032.54 | 0.47  |
| 137       | 128 | -1036.56 | -1036.45 | 0.89  |
| 138       | 128 | -1035.70 | -1035.76 | -0.41 |
| Interface |     |          |          |       |
| 139       | 52  | -441.34  | -441.34  | 0.03  |
| 140       | 60  | -507.35  | -507.34  | 0.21  |
| 141       | 68  | -576.73  | -576.77  | -0.52 |
| 142       | 84  | -711.32  | -711.27  | 0.59  |
| 143       | 72  | -609.45  | -609.45  | 0.06  |
| 144       | 76  | -645.41  | -645.40  | 0.18  |

\* Root mean square error between DFT energy and NN energy is 1.18 meV/atom.

**Table S3.** Comparison between the barrier ( $E_a$ ) of key reactions on  $\text{Fe}_5\text{C}_2(510)$  from DFT and NN calculations.

| reaction                                                                             | $E_a$ (eV) |      | Diff(eV) |
|--------------------------------------------------------------------------------------|------------|------|----------|
|                                                                                      | DFT        | NN   |          |
| $\text{CH}_{\text{Cv}} \rightarrow \text{CH} + \text{C}_{\text{v}}$                  | 0.78       | 0.77 | -0.02    |
| $\text{CO}_{\text{Cv}} \rightarrow \text{C}_{\text{Cv}} + \text{O}$                  | 1.19       | 1.07 | -0.12    |
| $\text{C}_{\text{Cv}} + \text{CH} \rightarrow \text{CCH}_{\text{Cv}}$                | 0.48       | 0.53 | 0.05     |
| $\text{CH}_{\text{Cv}} + \text{CH} \rightarrow \text{CHCH}_{\text{Cv}}$              | 0.38       | 0.33 | -0.05    |
| $\text{C}_{\text{Cv}} + \text{CCH}_3 \rightarrow \text{CCCH}_3_{\text{Cv}}$          | 0.55       | 0.55 | 0.00     |
| $\text{CH}_3 + \text{H} \rightarrow \text{CH}_4$                                     | 0.90       | 0.90 | 0.00     |
| $\text{CCH}_2_{\text{Cv}} + \text{H} \rightarrow \text{CCH}_3_{\text{Cv}}$           | 0.44       | 0.45 | 0.01     |
| $\text{CCH}_2_{\text{Cv}} + \text{H} \rightarrow \text{CHCH}_2_{\text{Cv}}$          | 0.75       | 0.71 | -0.04    |
| $\text{CHCH}_2 + \text{H} \rightarrow \text{CH}_2\text{CH}_2$                        | 0.66       | 0.69 | 0.03     |
| $\text{O} + \text{H} \rightarrow \text{OH}$                                          | 1.06       | 0.90 | -0.16    |
| $\text{O} + \text{CH}_{\text{Cv}} \rightarrow \text{OH} + \text{C}_{\text{Cv}}$      | 1.33       | 1.19 | -0.13    |
| $\text{OH} + \text{H} \rightarrow \text{H}_2\text{O}$                                | 0.70       | 0.68 | -0.03    |
| $\text{CO} + \text{O} \rightarrow \text{CO}_2$                                       | 1.19       | 0.95 | -0.24    |
| $\text{COOH} \rightarrow \text{CO}_2 + \text{H}$                                     | 1.28       | 1.11 | -0.17    |
| $\text{COOH} + \text{C}_{\text{Cv}} \rightarrow \text{CO}_2 + \text{CH}_{\text{Cv}}$ | 0.86       | 0.64 | -0.23    |

## 1.2. Gibbs free energy correction

The Gibbs free energy  $G$  of bulks/surfaces can be approximated by their DFT total energy  $E(\text{DFT})$  with the appropriate inclusion of zero-point-energy (ZPE) since it is known that the vibration entropy and the PV term contributions of solid phases are negligibly small. The chemical potential  $\mu$  for gas phase molecules can be calculated as follows:

$$\mu(T, P) = E(\text{DFT}) + \text{ZPE} + \Delta H(0 \rightarrow 298 \text{ K}, P_0) + \Delta H(298 \text{ K} \rightarrow T, P_0) - TS(T, P_0) + k_B T \ln \frac{P}{P_0} \quad (4)$$

where enthalpy ( $H$ ) and entropy ( $S$ ) terms of gas phase molecules are taken from the standard thermodynamics data in NIST Chemistry WebBook and NIST-JANAF Thermochemical Tables.

## 1.3. Microkinetics simulation

In our microkinetics simulation, three corrections or assumptions are made as followed:

(i) The corrections for gas-phase CO (-0.17 eV),  $\text{H}_2\text{O}$  (+0.15 eV) and  $\text{CO}_2$  (-0.13 eV) free energies are adopted according to the enthalpy changes for the gas-phase reactions:  $\text{CO}(\text{g}) + 2\text{H}_2(\text{g}) \rightarrow 1/2\text{C}_2\text{H}_4(\text{g}) + \text{H}_2\text{O}(\text{g})$  (-1.09 and -1.41 eV calculated by the data from experiments and PBE functional, respectively) and  $\text{CO}(\text{g}) + 1/2\text{H}_2(\text{g}) \rightarrow 1/4\text{C}_2\text{H}_4(\text{g}) + 1/2\text{CO}_2(\text{g})$  (-1.03 and -1.13 eV calculated by the data from experiments and PBE functional, respectively).

(ii) The linear relationship between the adsorption free energies of CO and H and the total surface coverage of the Fe site ( $\sum\theta_i^*$ ) are established according to our DFT energetics results (See Figure S1). For example, at 523 K:

$$G_{\text{ad}}(\text{H}) = 1.3881 \times \sum\theta_i^* - 0.5079$$

$$G_{\text{ad}}(\text{CO}) = 2.6704 \times \sum\theta_i^* - 1.2319$$

**Figure S1.** The linear fits (dotted lines) between the differential adsorption free energies of CO and H and the total surface coverage of Fe site at different temperatures (interval by 25 K) and the gas pressure of 1 bar from the DFT energetics results (dots).

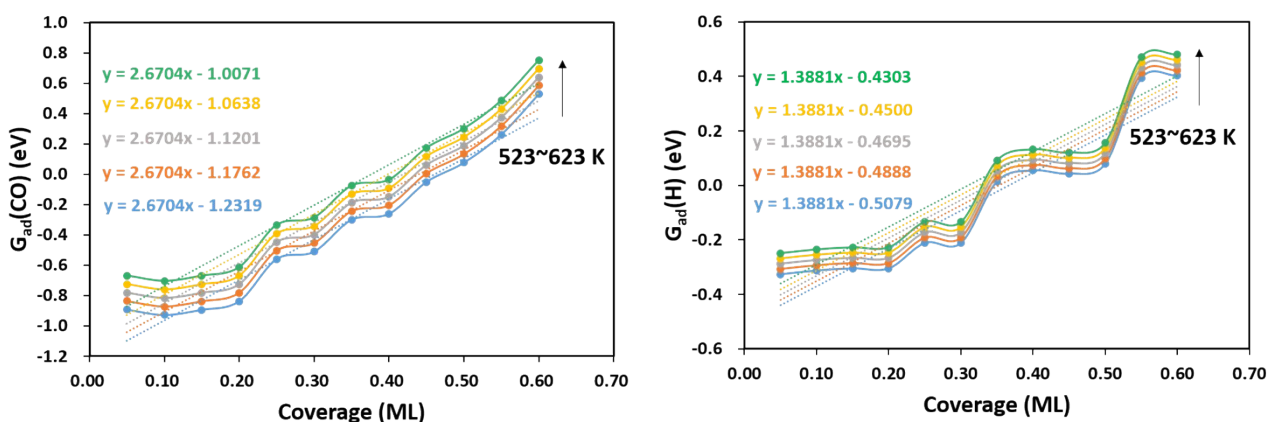

(iii) The reaction patterns and energetics for  $\text{C}_n$ -to- $\text{C}_{n+1}$  reactions ( $n > 2$ ) are the same as those in  $\text{C}_2$ -to- $\text{C}_3$ .

## 2. Structural details for surface model

**Figure S2.** Eight low energy surfaces for exploring CO dissociation channels. The A-P5 sites in six surfaces mentioned in the Discussions section are labelled.

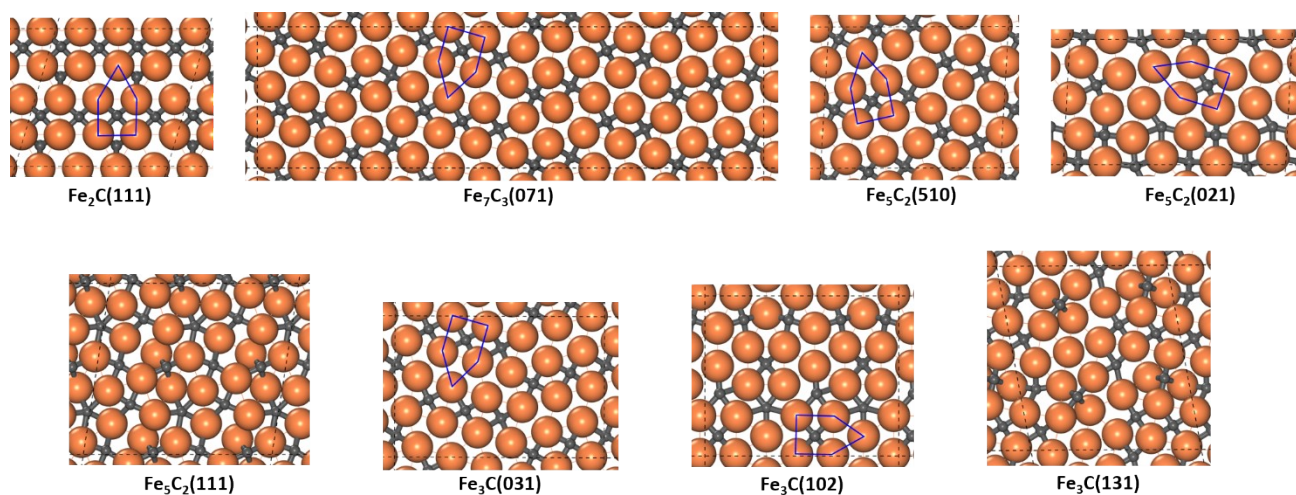

Besides A-P5 and B-P5 sites, there are other local Fe-C bonding patterns on surfaces (see Figure 2a):

(i) **Distorted five-fold site (D5).**  $\text{Fe}_5\text{C}_2(021)$ ,  $\text{Fe}_5\text{C}_2(111)$  and  $\text{Fe}_3\text{C}(131)$  have this site. In the D5 site, the C coordinates with a distorted  $\text{Fe}_4$  square which shares the longest edge with an  $\text{Fe}_3$  acute triangle. The C-Fe distance in the distorted  $\text{Fe}_4\text{C}$  square has a wide range from 1.85 to 2.22 Å.

(ii) **Pentagon (PG).**  $\text{Fe}_5\text{C}_2(021)$ ,  $\text{Fe}_5\text{C}_2(111)$  and  $\text{Fe}_3\text{C}(102)$  have this site. The C coordinates with five Fe atoms in a quasi-planar pentagon with five obtuse internal angles. The longest C-Fe distance in the  $\text{Fe}_5\text{C}$  pentagon is about 2.2~2.5 Å.

(iii) **Folded rectangle (FR).**  $\text{Fe}_5\text{C}_2(111)$  and  $\text{Fe}_3\text{C}(131)$  have this site. In this site, C coordinates with four Fe atoms in a folded rectangular geometry. The C-Fe distance is short (1.83~1.97 Å), but there are at least two C-Fe pairs with bond lengths up to 1.93 Å in a folded rectangle.

(iv) **Isolated square (IS).**  $\text{Fe}_3\text{C}(131)$  has this site where C coordinates with an  $\text{Fe}_4$  square isolated by steep steps and other C sites.

### 3. ML-TS of CO activation on $\text{Fe}_5\text{C}_2(510)$

**Figure S3.** Typical TS-like structures on  $\text{Fe}_5\text{C}_2(510)$  with a C vacancy sampled by ML-TS. The reaction barrier is calculated by NN potential.

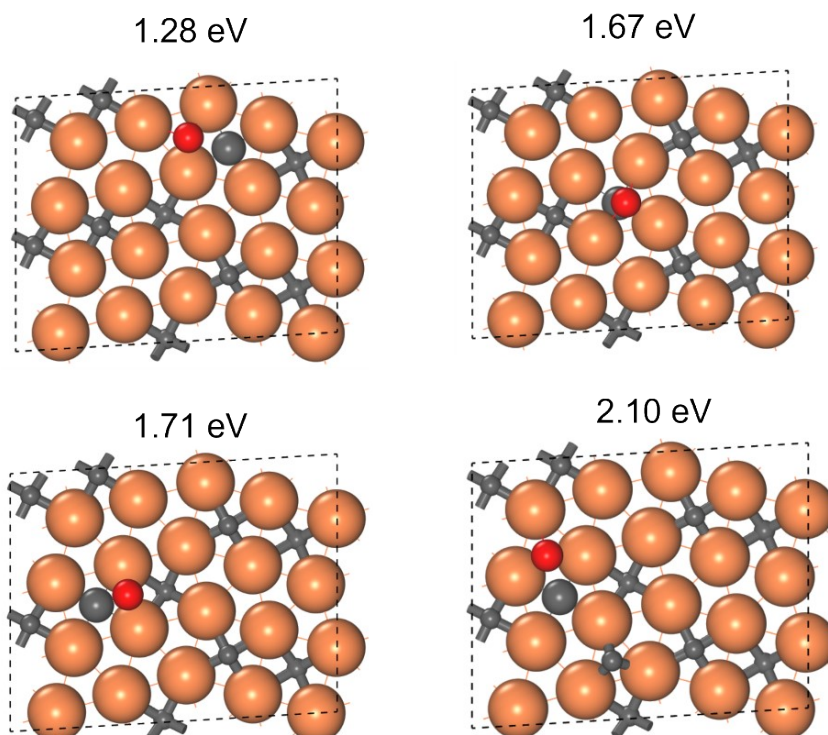

ML-TS takes into account the degrees of freedom from both molecular configurations and the surface structure reconstruction. The O atom in CO molecule adsorbs on the  $\text{Fe}_3$  (top left) or  $\text{Fe}_2$  (bottom left) sites or links to the sinking C atom (top right) in TS. The surface reconstruction, for example, a single C atom at  $\text{Fe}_3$  formed by C diffusion from the subsurface, or a C vacancy formed by C diffusion to the subsurface, can also be captured by ML-TS.

**Figure S4.** The lowest-energy TS for the terrace (left) and step (right) of  $\text{Fe}_5\text{C}_2(510)$  without a C vacancy.

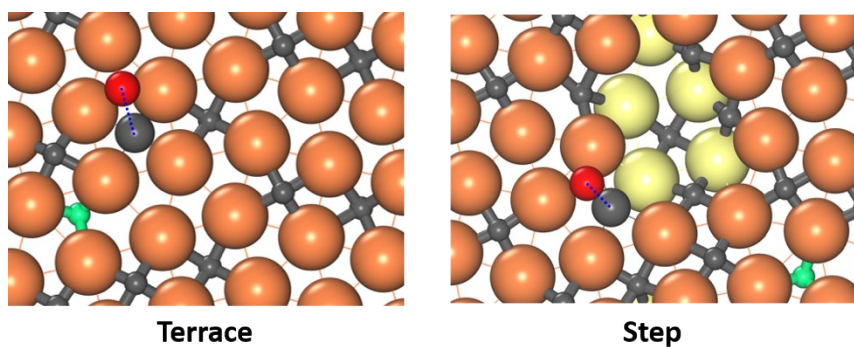

CO dissociates at the surface C vacant site. The surface reconstruction occurs where a surface C atom re-locates to the subsurface site, as indicated by the green (compare with the green atom in Figure S5). The Fe atoms in the second layer is colored by yellow.

**Figure S5.** The ISs of CO dissociation for the terrace and step of  $\text{Fe}_5\text{C}_2(510)$  with and without a C vacancy.

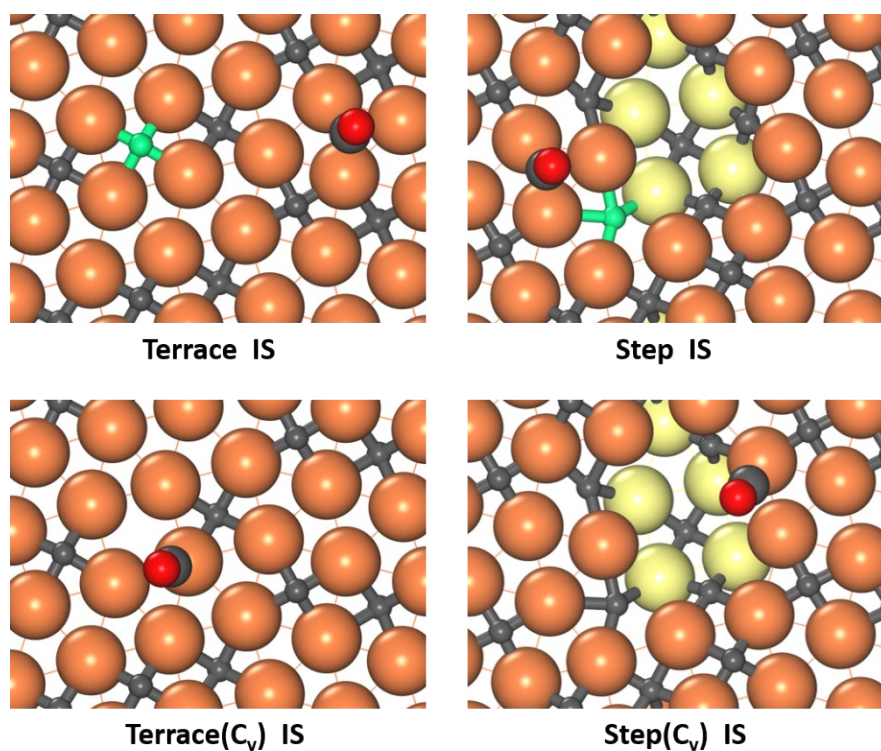

**Figure S6.** The IS and the TS for the lowest-energy pathway of H-assisted CO dissociation on  $\text{Fe}_5\text{C}_2(510)$  at a C vacancy site.

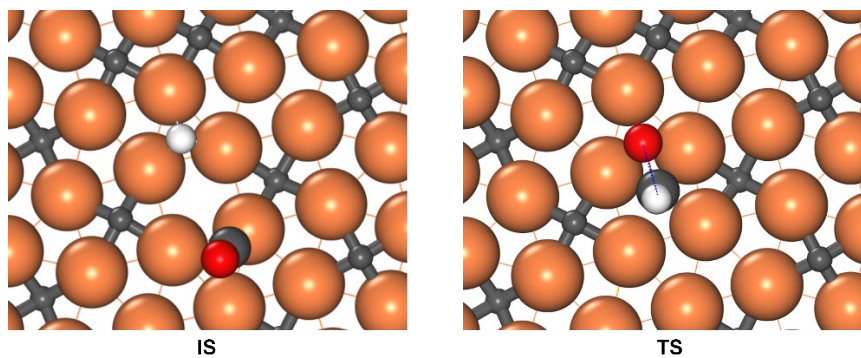

CO dissociates via the CHO intermediate in the C vacancy, which has a barrier of 1.50 eV (0.32 eV higher than C-vacancy mediated CO direct dissociation). The C-O distance is 1.66 Å in TS.



#### 4. Reaction pathways for C-C coupling, O removal and C<sub>2</sub>H<sub>4</sub> formation

Figure S7. TSs for C-C couplings on Fe<sub>5</sub>C<sub>2</sub>(510). The C-C distance is denoted by blue line.

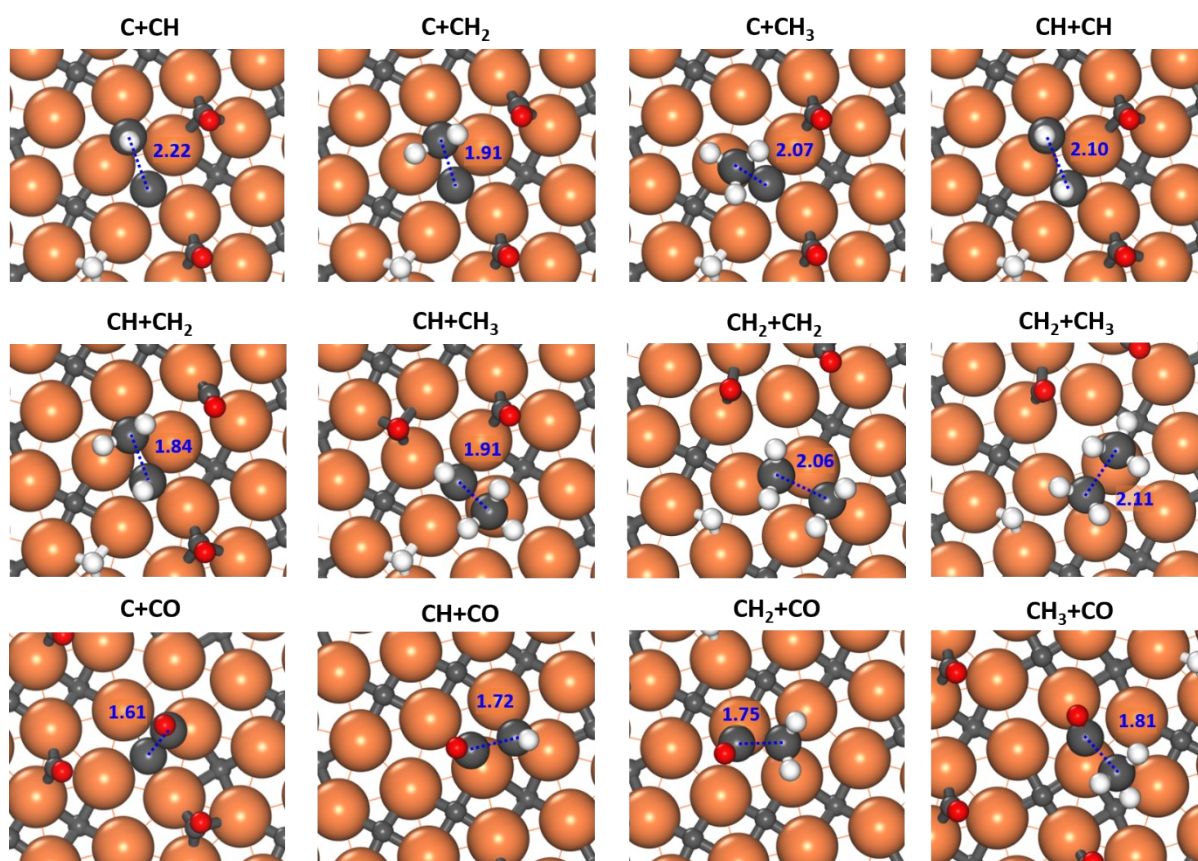

**Table S4.** The reaction free energy barrier ( $G_a$ ) and reaction free energy ( $\Delta G$ ) of 9 key reactions at different coverages.

| Reaction                                                                    | 0.05 ML CO<br>+ 0.05 ML H |                 | 0.20 ML CO<br>+ 0.05 ML H |                 | 0.25 ML H  |                 |
|-----------------------------------------------------------------------------|---------------------------|-----------------|---------------------------|-----------------|------------|-----------------|
|                                                                             | $G_a$ (eV)                | $\Delta G$ (eV) | $G_a$ (eV)                | $\Delta G$ (eV) | $G_a$ (eV) | $\Delta G$ (eV) |
| $\text{CO}_{\text{Cv}} \rightarrow \text{C}_{\text{Cv}} + \text{O}$         | 0.99                      | -0.66           | 1.16                      | -0.13           | 1.26       | -0.31           |
| $\text{C}_{\text{Cv}} + \text{CH} \rightarrow \text{CCH}_{\text{Cv}}$       | 0.70                      | 0.02            | 0.48                      | -0.23           | 0.64       | -0.03           |
| $\text{CH}_{\text{Cv}} + \text{CH} \rightarrow \text{CHCH}_{\text{Cv}}$     | 0.52                      | 0.22            | 0.37                      | -0.01           | 0.53       | 0.13            |
| $\text{CHCH}_2_{\text{Cv}} \rightarrow \text{CHCH}_2 + \text{C}_{\text{v}}$ | 0.56                      | -0.21           | 0.20                      | -0.44           | 0.18       | -0.28           |
| $\text{CHCH}_2 + \text{H} \rightarrow \text{CH}_2\text{CH}_2$               | 0.83                      | 0.02            | 0.66                      | 0.04            | 0.68       | 0.18            |
| $\text{C}_{\text{Cv}} + \text{CCH}_3 \rightarrow \text{CCCH}_3_{\text{Cv}}$ | 0.79                      | 0.61            | 0.54                      | -0.07           | 0.69       | 0.10            |
| $\text{CH} + \text{H} \rightarrow \text{CH}_2$                              | 0.74                      | 0.23            | 0.58                      | 0.17            | 0.62       | 0.20            |
| $\text{CH}_2 + \text{H} \rightarrow \text{CH}_3$                            | 0.78                      | -0.08           | 0.62                      | -0.04           | 0.71       | -0.06           |
| $\text{CH}_3 + \text{H} \rightarrow \text{CH}_4$                            | 0.98                      |                 | 0.90                      |                 | 0.99       |                 |

**Figure S8.** Free energy profile for O removal on  $\text{Fe}_5\text{C}_2(510)$ . The reaction conditions are set at  $T = 523$  K,  $P = 2.5$  MPa and  $\text{H}_2/\text{CO} = 2$  for computing the free energies.

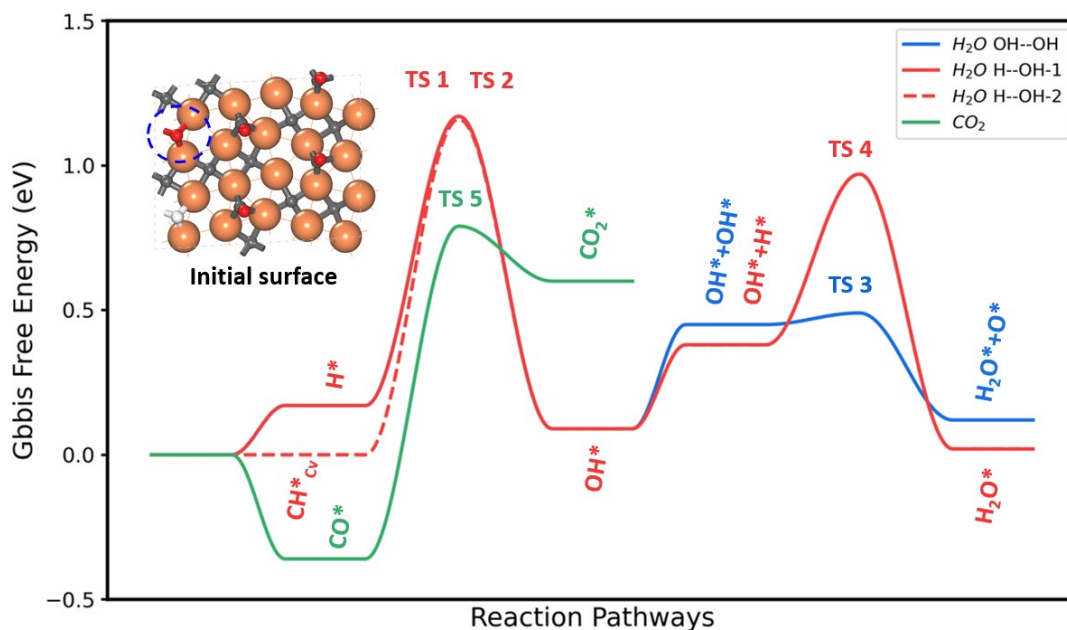

**Figure S9.** Free energy profile for the formation of  $\text{CO}_2$  via  $\text{COOH}$  ( $\text{CO}+\text{OH}\rightarrow\text{COOH}$ ,  $\text{COOH}\rightarrow\text{COO}+\text{H}$  and  $\text{COOH}+\text{C}\rightarrow\text{COO}+\text{C}$ ) on  $\text{Fe}_5\text{C}_2(510)$ .

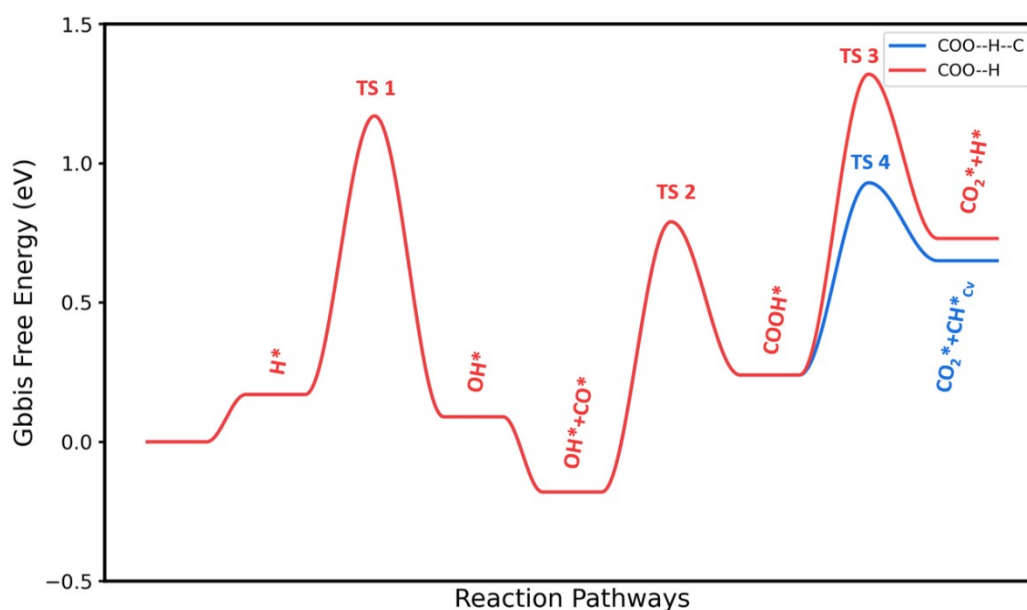

The O-removal reactions have been explored on  $\text{Fe}_5\text{C}_2(510)$  surface at different surface coverages. At relatively high surface coverages, these reactions become kinetically favorable. As shown in the inset of Figure S8, the surface coverage is 0.20 ML CO+0.05 ML H+0.05 ML O and the effective barriers for the  $\text{CO}_2$  formation and  $\text{H}_2\text{O}$  formation are 1.11 and 1.16 eV respectively. The reactions are elaborated as follows (also see above figures).

For the elementary step of O+H, a coming H has to adsorb on a less stable 3-fold hollow site

with an endothermic of 0.17 eV ( $H^*$ ) and then diffuses across the top site of an Fe atom to form the new bond with O (TS1 and  $OH^*$  in Figure S8, the barrier is 1.01 eV). The hydrogenation of O can also be achieved by the shift of H from C to adjacent O with a barrier of 1.16 eV (red dash line in Figure S8), in which the C-H distance increases from 1.10 Å to 1.41 Å and O-H distance decreases to 1.39 Å. Next, OH can undergo further hydrogenation (red line) or disproportionation with another OH (blue line). The former needs one more H diffusing next to the OH on the bridge site, which is endothermic by 0.29 eV ( $OH^*+H^*$  in Figure S8). Then, the distance between O and H shortens to 1.49 Å and finally  $H_2O$  is formed, which has a barrier of 0.59 eV. The latter occurs when two OH species meet each other with the endothermicity of 0.36 eV ( $OH^*+OH^*$  in Figure S8), and H shifts from one OH to the other with a barrier of 0.04 eV (TS4 in Figure S8).

For the oxidation of CO, a coming CO adsorbs on the Fe top site with an exothermicity of 0.36 eV and diffuses near to the O atom. Next, CO tilts to the O atom in the 3-fold hollow site and the distance of C and the isolated O decreases from 2.68 Å to 1.62 Å. With the shortening distance of C-O,  $CO_2$  forms finally, which overcomes a barrier of 1.14 eV. We also considered the other reaction pathways for the formation of  $CO_2$  via COOH (See Figure S9). Our results show that  $COOH \rightarrow COO+H$  has a higher overall barrier (1.50 eV), while  $COOH+C \rightarrow COO+C$  has a lower barrier of 1.11 eV.

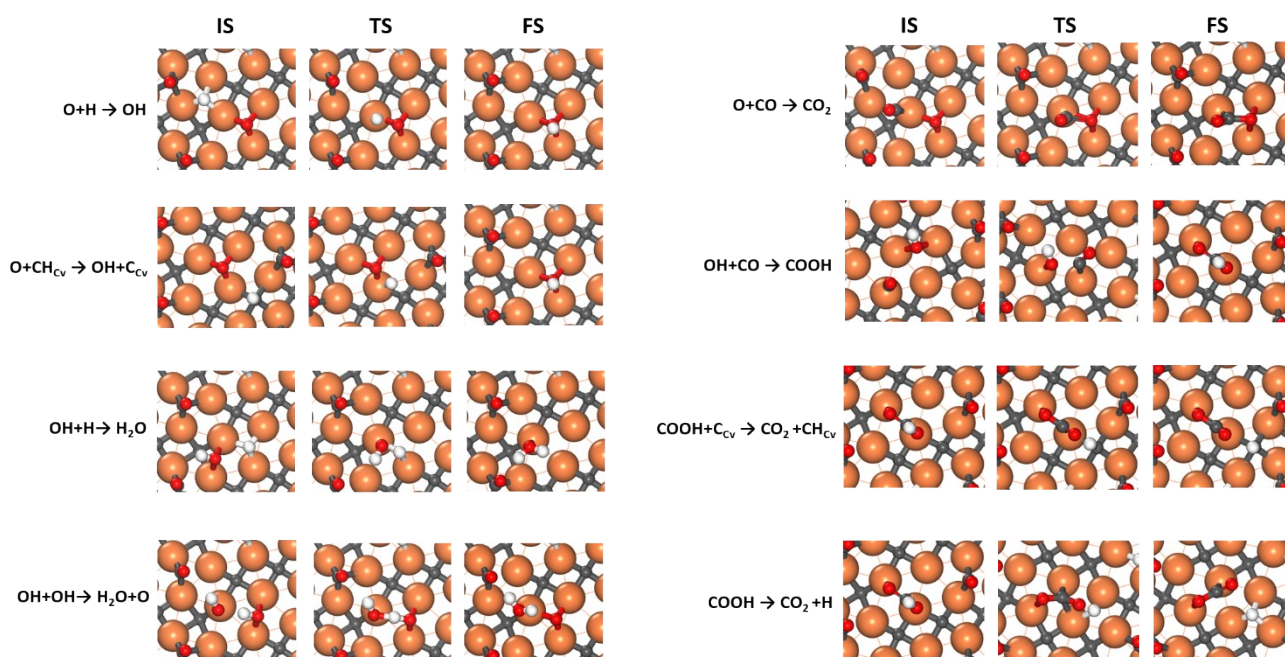

**Figure S10.** Structure snapshots for O removal.

**Figure S11.** Free energy profile for  $C_2H_4$  formation on  $Fe_5C_2(510)$ . The reaction conditions are set at  $T = 523$  K,  $P = 2.5$  MPa and  $H_2/CO = 2$  for computing the free energies. The red solid and dashed lines

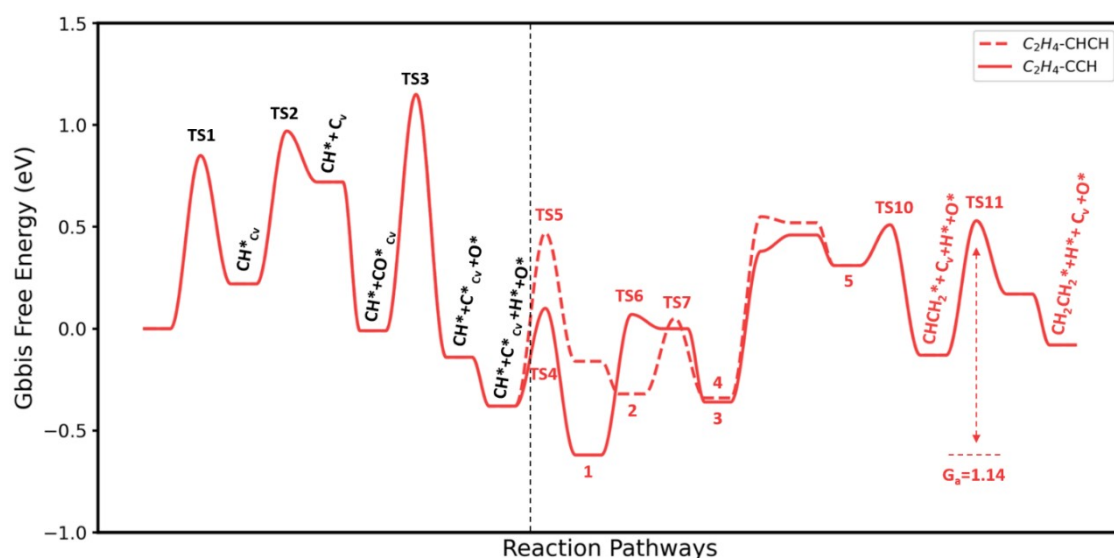

are the pathways for  $C_2H_4$  formation via  $C+CH$  and  $CH+CH$ , respectively.

**Figure S12.** Structure snapshots for the reactions in Figure 4b and Figure S11.

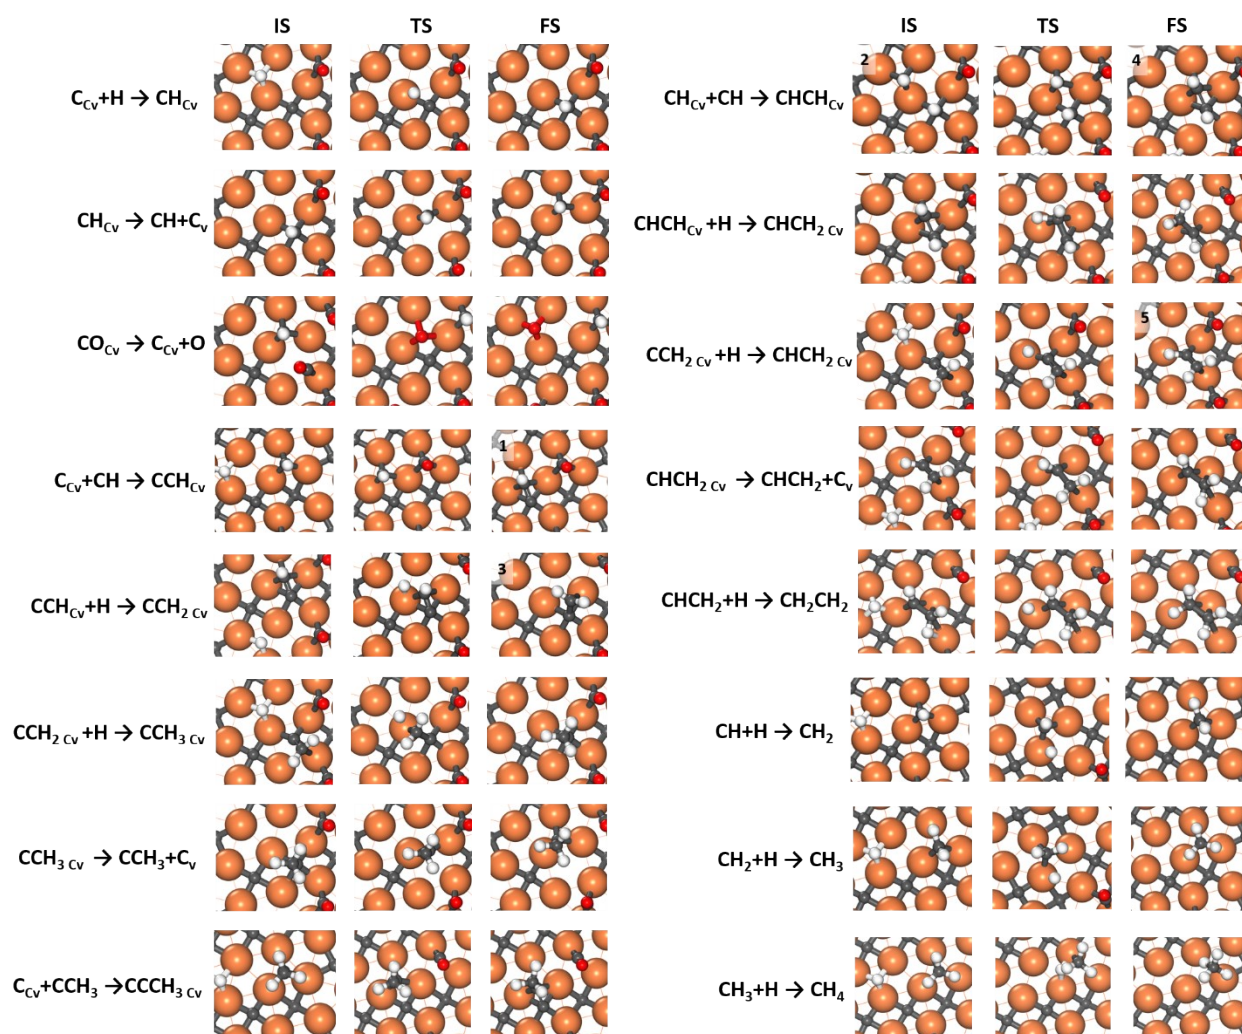



## 5. Microkinetics

### 5.1. Estimation of iron time yield (FTY)

Our calculated CO consumption rate is  $1.49 \text{ s}^{-1}$  at 548 K and 2.5 MPa syngas ( $\text{H}_2/\text{CO}=2$ ). The FTY (moles of CO converted to hydrocarbons per gram of Fe per second) is commonly used in the Fe-based FT experiments to evaluate the catalytic activity. In order to compare our microkinetics results with available experimental data, our theoretical FTY is estimated as follows:

Assumption 1: The catalyst consists of the single-phase  $\text{Fe}_5\text{C}_2$  and there are no other Fe-containing phases.

Assumption 2: the  $\text{Fe}_5\text{C}_2$  nanoparticle is a sphere with a diameter of 20 nm.

Assumption 3: The percentage of the exposed area of  $\text{Fe}_5\text{C}_2(510)$  is 21.84% according to the Wulff construction of  $\text{Fe}_5\text{C}_2$  nanoparticle (Figure S13).

$$\text{Volume of the catalyst: } V = \left(\frac{4}{3}\right)\pi r^3 = 4.187 \times 10^{-24} \text{ m}^3$$

$$\text{Surface area of the catalyst: } S = 4\pi r^2 = 1.256 \times 10^{-15} \text{ m}^2$$

$$\text{Mass of the catalyst: } m = V \cdot \rho = 3.275 \times 10^{-17} \text{ g}$$

$$\text{Mass of the Fe in the catalyst: } m_{\text{Fe}} = 3.015 \times 10^{-17} \text{ g}$$

$$\text{Specific surface area of the catalyst (per gram Fe): } A = \frac{S}{m_{\text{Fe}}} = 41.655 \text{ m}^2 \cdot \text{g}_{\text{Fe}}^{-1}$$

$$\text{Specific surface area of the exposed } \text{Fe}_5\text{C}_2(510): A_{510} = 41.655 \times 21.84\% = 9.097 \text{ m}^2 \cdot \text{g}_{\text{Fe}}^{-1}$$

$$\text{The total number of the active site per gram Fe on } \text{Fe}_5\text{C}_2(510): N_{\text{Fe}} = 1.440 \times 10^{20} \text{ g}_{\text{Fe}}^{-1}$$

According to our microkinetics results, the rate of the consumption of CO for the hydrocarbon formation is  $r_{\text{CO to hydrocarbons}} = r_{\text{CO}} - r_{\text{CO to CO}_2} = 1.495 - 0.084 = 1.411 \text{ s}^{-1}$

$$\text{FTY} = \frac{1.440 \times 10^{20} \times 1.411}{6.02 \times 10^{23}} = 3.4 \times 10^{-4} \text{ mol}_{\text{CO}} \cdot \text{g}_{\text{Fe}}^{-1} \cdot \text{s}^{-1}$$

We also note that According to experimental literatures<sup>8-10</sup>, the FTY of single-phase  $\text{Fe}_5\text{C}_2$  catalyst is ~10 times larger than those of the traditional composite catalysts prepared from iron oxide, which might be due to the less concentration of the active sites in composite catalysts compared to the pure-phase  $\text{Fe}_5\text{C}_2$  catalyst with the same content of Fe. To compare the theoretical FTY with the experimental data in Figure 5e, we assume that 10% of Fe are active:

$$\text{FTY}' = \text{FTY} \times 10\%$$





**Figure S13.** The Wulff construction of Fe<sub>5</sub>C<sub>2</sub> nanoparticle.

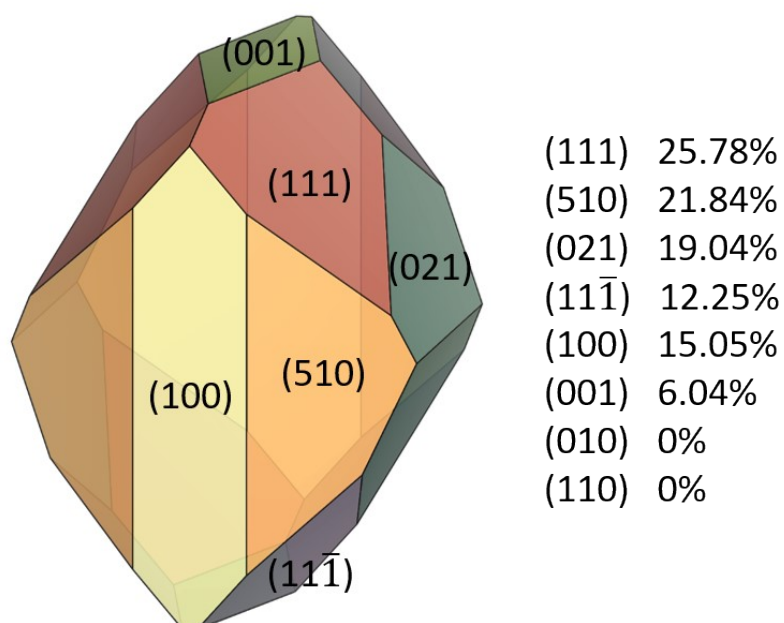

The surface free energies utilized to construct the Wulff shape are from our previous works<sup>11, 12</sup>, which are 1.68, 1.75, 1.80, 1.81, 2.03, 2.11, 2.37 and 2.41 J/m<sup>2</sup> for (100), (510), (021), (111), (010), (11 $\bar{1}$ ), (001) and (110) facets with respect to Fe<sub>5</sub>C<sub>2</sub> bulk at  $\mu_c = -6.90$  eV.

## 5.2. Analysis of chain growth probability factor ( $\alpha$ )

$$\alpha = \frac{r_p}{r_p + r_t} = 0.44$$

Take C<sub>3</sub> propagation as an example:

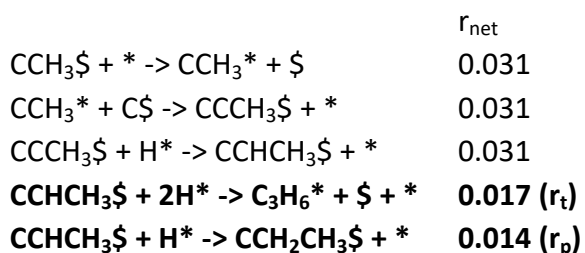

**Table S5.** The DFT reaction energy and barrier, ZPE corrections and Gibbs free energy barriers (forward and reverse) for all elementary steps (523 K) at Fe<sub>5</sub>C<sub>2</sub>(510). \* and \$ denote the Fe site and the C vacant site, respectively.

|    | Reaction                                                               | $\Delta E(\text{FS-IS})$<br>(eV) | $\Delta E(\text{TS-IS})$<br>(eV) | $\Delta \text{ZPE}(\text{FS-IS})$<br>(eV) | $\Delta \text{ZPE}(\text{TS-IS})$<br>(eV) | G <sub>a,+</sub><br>(eV) | G <sub>a,-</sub><br>(eV) |
|----|------------------------------------------------------------------------|----------------------------------|----------------------------------|-------------------------------------------|-------------------------------------------|--------------------------|--------------------------|
| 1  | H <sub>2</sub> +2* → 2H*                                               |                                  |                                  |                                           |                                           |                          |                          |
| 2  | CO+* → CO*                                                             |                                  |                                  |                                           |                                           |                          |                          |
|    |                                                                        |                                  |                                  | See Figure S1                             |                                           |                          |                          |
| 3  | H <sub>2</sub> +2\$ → 2H\$                                             | -0.10                            | 0.20                             | 0.00                                      | 0.00                                      | 0.20                     | 0.30                     |
| 4  | CO+\$ → CO\$                                                           | -0.33                            | 0.20                             | 0.00                                      | 0.00                                      | 0.20                     | 0.53                     |
| 5  | C\$+H* → CH\$+*                                                        | 0.14                             | 0.91                             | 0.08                                      | -0.06                                     | 0.85                     | 0.63                     |
| 6  | CH\$+* → CH*+\$                                                        | 0.52                             | 0.78                             | -0.02                                     | -0.03                                     | 0.76                     | 0.26                     |
| 7  | CH*+C\$ → CCH\$+*                                                      | -0.25                            | 0.48                             | 0.01                                      | 0.00                                      | 0.48                     | 0.71                     |
| 8  | CCH\$+H* → CCH <sub>2</sub> \$+*                                       | 0.11                             | 0.71                             | 0.15                                      | -0.03                                     | 0.69                     | 0.43                     |
| 9  | CCH <sub>2</sub> \$+H* → CCH <sub>3</sub> \$+*                         | -0.14                            | 0.44                             | 0.11                                      | -0.02                                     | 0.42                     | 0.45                     |
| 10 | CCH <sub>2</sub> \$+H* → CHCH <sub>2</sub> \$+*                        | 0.57                             | 0.75                             | 0.10                                      | 0.06                                      | 0.81                     | 0.14                     |
| 11 | CHCH <sub>2</sub> \$+* → CHCH <sub>2</sub> *+\$                        | -0.45                            | 0.23                             | 0.01                                      | -0.03                                     | 0.20                     | 0.64                     |
| 12 | CHCH <sub>2</sub> *+H* → CH <sub>2</sub> CH <sub>2</sub> *+*           | -0.12                            | 0.66                             | 0.16                                      | -0.01                                     | 0.66                     | 0.61                     |
| 13 | CH*+CH\$ → CHCH\$+*                                                    | -0.01                            | 0.38                             | 0.00                                      | -0.01                                     | 0.37                     | 0.39                     |
| 14 | CHCH\$+H* → CHCH <sub>2</sub> \$+*                                     | 0.66                             | 0.89                             | 0.09                                      | 0.00                                      | 0.89                     | 0.13                     |
| 15 | CH <sub>2</sub> CH <sub>2</sub> * → CH <sub>2</sub> CH <sub>2</sub> +* | -0.33                            | 0.30                             | -0.05                                     | 0.00                                      | 0.30                     | 0.69                     |
| 16 | CH*+H* → CH <sub>2</sub> *+*                                           | 0.08                             | 0.63                             | 0.09                                      | -0.05                                     | 0.58                     | 0.41                     |
| 17 | CH <sub>2</sub> *+H* → CH <sub>3</sub> *+*                             | -0.18                            | 0.64                             | 0.14                                      | -0.02                                     | 0.62                     | 0.66                     |
| 18 | CH <sub>3</sub> *+H* → CH <sub>4</sub> +2*                             | -1.08                            | 0.90                             | 0.11                                      | 0.00                                      | 0.90                     | 1.88                     |
| 19 | CO\$+* → C\$+O*                                                        | -0.14                            | 1.19                             | 0.01                                      | -0.04                                     | 1.16                     | 1.29                     |
| 20 | O*+H* → OH*+*                                                          | -0.03                            | 1.19                             | 0.12                                      | -0.02                                     | 1.18                     | 1.08                     |
| 21 | O*+CH\$ → OH*+C\$                                                      | 0.07                             | 1.33                             | 0.00                                      | -0.17                                     | 1.16                     | 1.09                     |
| 22 | OH*+H* → H <sub>2</sub> O*+*                                           | -0.23                            | 0.93                             | 0.16                                      | -0.05                                     | 0.88                     | 0.95                     |
| 23 | 2OH* → H <sub>2</sub> O*+O*                                            | -0.02                            | 0.48                             | 0.05                                      | -0.08                                     | 0.40                     | 0.37                     |
| 24 | H <sub>2</sub> O* → H <sub>2</sub> O+*                                 | -0.09                            | 0.10                             | -0.10                                     | 0.00                                      | 0.10                     | 0.29                     |
| 25 | O*+CO* → CO <sub>2</sub> *+*                                           | 0.98                             | 1.19                             | -0.01                                     | -0.04                                     | 1.14                     | 0.18                     |
| 26 | CO*+OH* → COOH*+*                                                      | 0.40                             | 0.99                             | 0.03                                      | -0.02                                     | 0.97                     | 0.55                     |
| 27 | COOH*+C\$ → CO <sub>2</sub> *+CH\$                                     | 0.47                             | 0.86                             | -0.06                                     | -0.18                                     | 0.68                     | 0.27                     |
| 28 | COOH*+* → CO <sub>2</sub> *+H*                                         | 0.63                             | 1.28                             | -0.14                                     | -0.21                                     | 1.07                     | 0.58                     |
| 29 | CO <sub>2</sub> * → CO <sub>2</sub> +*                                 | -1.65                            | 0.10                             | 0.01                                      | 0.00                                      | 0.10                     | 1.74                     |
| 30 | CCH <sub>3</sub> \$+* → CCH <sub>3</sub> *+\$                          | 0.33                             | 0.57                             | -0.02                                     | -0.03                                     | 0.54                     | 0.23                     |
| 31 | CCH <sub>3</sub> *+C\$ → CCCH <sub>3</sub> \$+*                        | -0.09                            | 0.55                             | 0.01                                      | 0.00                                      | 0.54                     | 0.62                     |
| 32 | CCCH <sub>3</sub> \$+H* → CCHCH <sub>3</sub> \$+*                      | 0.11                             | 0.71                             | 0.15                                      | -0.03                                     | 0.69                     | 0.43                     |
| 33 | CCHCH <sub>3</sub> \$+2H* → C <sub>3</sub> H <sub>6</sub> *+*+\$       | 0.00                             | 0.78                             | 0.27                                      | 0.10                                      | 0.88                     | 0.61                     |
| 34 | C <sub>3</sub> H <sub>6</sub> * → C <sub>3</sub> H <sub>6</sub> +*     | -0.38                            | 0.25                             | -0.05                                     | 0.00                                      | 0.25                     | 0.69                     |
| 35 | CCHCH <sub>3</sub> \$+H* → CCH <sub>2</sub> CH <sub>3</sub> \$+*       | -0.14                            | 0.44                             | 0.11                                      | -0.02                                     | 0.42                     | 0.45                     |
|    |                                                                        |                                  | ...                              |                                           |                                           |                          |                          |
|    | C <sub>4</sub> H <sub>8</sub> * → C <sub>4</sub> H <sub>8</sub> +*     | -0.43                            | 0.20                             | -0.05                                     | 0.00                                      | 0.20                     | 0.69                     |
|    |                                                                        |                                  | ...                              |                                           |                                           |                          |                          |
|    | C <sub>5</sub> H <sub>10</sub> * → C <sub>5</sub> H <sub>10</sub> +*   | -0.48                            | 0.15                             | -0.05                                     | 0.00                                      | 0.15                     | 0.69                     |
|    |                                                                        |                                  | ...                              |                                           |                                           |                          |                          |

|    |                                                         |       |      |       |       |      |      |
|----|---------------------------------------------------------|-------|------|-------|-------|------|------|
|    | $C_6H_{12}^* \rightarrow C_6H_{12}^{+*}$                | -0.53 | 0.10 | -0.05 | 0.00  | 0.10 | 0.69 |
|    |                                                         |       | ...  |       |       |      |      |
|    | $C_7H_{14}^* \rightarrow C_7H_{14}^{+*}$                | -0.58 | 0.05 | -0.05 | 0.00  | 0.05 | 0.69 |
|    |                                                         |       | ...  |       |       |      |      |
| 60 | $C(CH_2)_5CH_3\$+* \rightarrow C(CH_2)_5CH_3^*+\$$      | 0.33  | 0.57 | -0.02 | -0.03 | 0.54 | 0.23 |
| 61 | $C(CH_2)_5CH_3^*+C\$ \rightarrow CC(CH_2)_5CH_3\$+*$    | -0.09 | 0.55 | 0.01  | 0.00  | 0.54 | 0.62 |
| 62 | $CC(CH_2)_5CH_3\$+H^* \rightarrow CCH(CH_2)_5CH_3\$+*$  | 0.11  | 0.71 | 0.15  | -0.03 | 0.69 | 0.43 |
| 63 | $CCH(CH_2)_5CH_3\$+2H^* \rightarrow C_8H_{16}^{*+*}+\$$ | 0.00  | 0.78 | 0.27  | 0.10  | 0.88 | 0.61 |
| 64 | $C_8H_{16}^* \rightarrow C_8H_{16}^{+*}$                | -0.58 | 0.05 | -0.05 | 0.00  | 0.05 | 0.69 |

**Table S6.** Surface coverage of species in microkinetics simulation on Fe<sub>5</sub>C<sub>2</sub>(510) at 523 K. The pressures are set at 0.83, 1.67 and 0.1 MPa for CO, H<sub>2</sub> and each product (including hydrocarbons, CO<sub>2</sub> and H<sub>2</sub>O), respectively.

| Species                              | Coverage (ML) |
|--------------------------------------|---------------|
| \$                                   | 8.24E-07      |
| *                                    | 4.24E-01      |
| C\$                                  | 1.02E-01      |
| CO*                                  | 1.63E-01      |
| CO\$                                 | 1.03E-02      |
| H*                                   | 1.31E-01      |
| H\$                                  | 1.01E-05      |
| CH\$                                 | 2.40E-04      |
| CH*                                  | 1.68E-03      |
| CH <sub>2</sub> *                    | 1.20E-05      |
| CH <sub>3</sub> *                    | 9.00E-06      |
| CCH\$                                | 6.64E-02      |
| CCH <sub>2</sub> \$                  | 6.43E-05      |
| CCH <sub>3</sub> \$                  | 3.88E-05      |
| CCH <sub>3</sub> *                   | 2.05E-02      |
| CHCH\$                               | 1.48E-06      |
| CHCH <sub>2</sub> \$                 | 1.64E-12      |
| CHCH <sub>2</sub> *                  | 7.23E-04      |
| CH <sub>2</sub> CH <sub>2</sub> *    | 7.39E-05      |
| CCCH <sub>3</sub> \$                 | 2.92E-02      |
| CCHCH <sub>3</sub> \$                | 2.83E-05      |
| CCH <sub>2</sub> CH <sub>3</sub> \$  | 1.71E-05      |
| CCH <sub>2</sub> CH <sub>3</sub> *   | 9.03E-03      |
| CCCH <sub>2</sub> CH <sub>3</sub> \$ | 1.28E-02      |

|                                                       |          |
|-------------------------------------------------------|----------|
| CCHCH <sub>2</sub> CH <sub>3</sub> \$                 | 1.24E-05 |
| C(CH <sub>2</sub> ) <sub>2</sub> CH <sub>3</sub> \$   | 7.50E-06 |
| C(CH <sub>2</sub> ) <sub>2</sub> CH <sub>3</sub> *    | 3.97E-03 |
| CC(CH <sub>2</sub> ) <sub>2</sub> CH <sub>3</sub> \$  | 5.64E-03 |
| CCH(CH <sub>2</sub> ) <sub>2</sub> CH <sub>3</sub> \$ | 5.47E-06 |
| C(CH <sub>2</sub> ) <sub>3</sub> CH <sub>3</sub> \$   | 3.30E-06 |
| C(CH <sub>2</sub> ) <sub>3</sub> CH <sub>3</sub> *    | 1.75E-03 |
| CC(CH <sub>2</sub> ) <sub>3</sub> CH <sub>3</sub> \$  | 2.48E-03 |
| CCH(CH <sub>2</sub> ) <sub>3</sub> CH <sub>3</sub> \$ | 2.40E-06 |
| C(CH <sub>2</sub> ) <sub>4</sub> CH <sub>3</sub> \$   | 1.45E-06 |
| C(CH <sub>2</sub> ) <sub>4</sub> CH <sub>3</sub> *    | 7.68E-04 |
| CC(CH <sub>2</sub> ) <sub>4</sub> CH <sub>3</sub> \$  | 1.09E-03 |
| CCH(CH <sub>2</sub> ) <sub>4</sub> CH <sub>3</sub> \$ | 1.06E-06 |
| C(CH <sub>2</sub> ) <sub>5</sub> CH <sub>3</sub> \$   | 6.38E-07 |
| C(CH <sub>2</sub> ) <sub>5</sub> CH <sub>3</sub> *    | 3.38E-04 |
| CC(CH <sub>2</sub> ) <sub>5</sub> CH <sub>3</sub> \$  | 4.80E-04 |
| CCH(CH <sub>2</sub> ) <sub>5</sub> CH <sub>3</sub> \$ | 4.65E-07 |
| C <sub>3</sub> H <sub>6</sub> *                       | 2.44E-05 |
| C <sub>4</sub> H <sub>8</sub> *                       | 8.04E-06 |
| C <sub>5</sub> H <sub>10</sub> *                      | 2.65E-06 |
| C <sub>6</sub> H <sub>12</sub> *                      | 8.74E-07 |
| C <sub>7</sub> H <sub>14</sub> *                      | 2.88E-07 |
| C <sub>8</sub> H <sub>16</sub> *                      | 2.88E-07 |
| O*                                                    | 1.73E-03 |
| OH*                                                   | 4.58E-03 |
| H <sub>2</sub> O*                                     | 6.25E-03 |
| COOH*                                                 | 1.25E-07 |

---

**Table S7.** Degree of rate control (DRC)<sup>13</sup> for each elementary step.

$$DRC_i = \left( \frac{\partial \ln r}{\partial \ln k_i} \right)_{k_j \neq i} K_i$$

where reaction rate  $r$  is defined as  $r(\text{CO}+\text{H}_2)$ , and  $k_i$  is the rate constant for the elementary step  $i$ .

| Reaction                                                                        | DRC             |
|---------------------------------------------------------------------------------|-----------------|
| H <sub>2</sub> +2* → 2H*                                                        | 7.80E-08        |
| CO+* → CO*                                                                      | -2.08E-05       |
| CO+§ → CO§                                                                      | 2.06E-07        |
| H <sub>2</sub> +2§ → 2H§                                                        | 0.00E+00        |
| C§+H* → CH§+*                                                                   | -7.99E-04       |
| CH§+* → CH*+§                                                                   | 1.88E-03        |
| CH*+C§ → CCH§+*                                                                 | 9.18E-06        |
| CCH§+H* → CCH <sub>2</sub> §+*                                                  | 7.00E-05        |
| CCH <sub>2</sub> §+H* → CCH <sub>3</sub> §+*                                    | -1.13E-06       |
| CCH <sub>2</sub> §+H* → CHCH <sub>2</sub> §+*                                   | 2.13E-01        |
| CHCH <sub>2</sub> §+* → CHCH <sub>2</sub> *+§                                   | 2.13E-01        |
| CHCH <sub>2</sub> *+H* → CH <sub>2</sub> CH <sub>2</sub> *+*                    | 1.66E-05        |
| CH*+CH§ → CHCH§+*                                                               | -8.38E-06       |
| CHCH§+H* → CHCH <sub>2</sub> §+*                                                | -2.39E-01       |
| CH <sub>2</sub> CH <sub>2</sub> * → CH <sub>2</sub> CH <sub>2</sub> *+*         | 7.33E-09        |
| CH*+H* → CH <sub>2</sub> *+*                                                    | 1.57E-06        |
| CH <sub>2</sub> *+H* → CH <sub>3</sub> *+*                                      | 5.28E-04        |
| CH <sub>3</sub> *+H* → CH <sub>4</sub> +2*                                      | 4.11E-02        |
| <b>CO§+* → C§+O*</b>                                                            | <b>4.10E-01</b> |
| O*+H* → OH*+*                                                                   | -5.68E-04       |
| O*+CH§ → OH*+C§                                                                 | -1.02E-04       |
| OH*+H* → H <sub>2</sub> O*+*                                                    | 1.77E-02        |
| 2OH* → H <sub>2</sub> O*+O*                                                     | 1.20E-06        |
| H <sub>2</sub> O* → H <sub>2</sub> O+*                                          | 7.06E-12        |
| O*+CO* → CO <sub>2</sub> *+*                                                    | 4.00E-05        |
| CO*+OH* → COOH*+*                                                               | 2.59E-06        |
| COOH*+C§ → CO <sub>2</sub> *+CH§                                                | 2.90E-05        |
| COOH*+* → CO <sub>2</sub> *+H*                                                  | 1.83E-08        |
| CO <sub>2</sub> * → CO <sub>2</sub> +*                                          | 3.92E-05        |
| CCH <sub>3</sub> §+* → CCH <sub>3</sub> *+§                                     | -8.34E-06       |
| CCH <sub>3</sub> *+C§ → CCCH <sub>3</sub> §+*                                   | 1.05E-08        |
| CCCH <sub>3</sub> §+H* → CCHCH <sub>3</sub> §+*                                 | 1.56E-06        |
| CCHCH <sub>3</sub> §+2H* → C <sub>3</sub> H <sub>6</sub> *+*+§                  | 5.79E-02        |
| C <sub>3</sub> H <sub>6</sub> * → C <sub>3</sub> H <sub>6</sub> +*              | 6.39E-11        |
| CCHCH <sub>3</sub> §+H* → CCH <sub>2</sub> CH <sub>3</sub> §+*                  | -4.54E-08       |
| CCH <sub>2</sub> CH <sub>3</sub> §+* → CCH <sub>2</sub> CH <sub>3</sub> *+§     | -3.27E-07       |
| CCH <sub>2</sub> CH <sub>3</sub> *+C§ → CCCH <sub>2</sub> CH <sub>3</sub> §+*   | 3.06E-08        |
| CCCH <sub>2</sub> CH <sub>3</sub> §+H* → CCHCH <sub>2</sub> CH <sub>3</sub> §+* | 1.07E-06        |
| CCHCH <sub>2</sub> CH <sub>3</sub> §+2H* → C <sub>4</sub> H <sub>8</sub> *+*+§  | 3.36E-02        |
| C <sub>4</sub> H <sub>8</sub> * → C <sub>4</sub> H <sub>8</sub> +*              | 1.20E-11        |

|                                                                   |          |
|-------------------------------------------------------------------|----------|
| $CCHCH_2CH_3\dot{S}+H^* \rightarrow C(CH_2)_2CH_3\dot{S}+^*$      | 1.62E-07 |
| $C(CH_2)_2CH_3\dot{S}+^* \rightarrow C(CH_2)_2CH_3^*+S$           | 1.20E-06 |
| $C(CH_2)_2CH_3^*+C\dot{S} \rightarrow CC(CH_2)_2CH_3\dot{S}+^*$   | 2.37E-08 |
| $CC(CH_2)_2CH_3\dot{S}+H^* \rightarrow CCH(CH_2)_2CH_3\dot{S}+^*$ | 6.23E-07 |
| $CCH(CH_2)_2CH_3\dot{S}+2H^* \rightarrow C_5H_{10}^*+^*+S$        | 1.80E-02 |
| $C_5H_{10}^* \rightarrow C_5H_{10}+^*$                            | 2.14E-12 |
| $CCH(CH_2)_2CH_3\dot{S}+H^* \rightarrow C(CH_2)_3CH_3\dot{S}+^*$  | 1.32E-07 |
| $C(CH_2)_3CH_3\dot{S}+^* \rightarrow C(CH_2)_3CH_3^*+S$           | 9.77E-07 |
| $C(CH_2)_3CH_3^*+C\dot{S} \rightarrow CC(CH_2)_3CH_3\dot{S}+^*$   | 1.36E-08 |
| $CC(CH_2)_3CH_3\dot{S}+H^* \rightarrow CCH(CH_2)_3CH_3\dot{S}+^*$ | 3.17E-07 |
| $CCH(CH_2)_3CH_3\dot{S}+2H^* \rightarrow C_6H_{12}^*+^*+S$        | 9.30E-03 |
| $C_6H_{12}^* \rightarrow C_6H_{12}+^*$                            | 3.70E-13 |
| $CCH(CH_2)_3CH_3\dot{S}+H^* \rightarrow C(CH_2)_4CH_3\dot{S}+^*$  | 6.65E-08 |
| $C(CH_2)_4CH_3\dot{S}+^* \rightarrow C(CH_2)_4CH_3^*+S$           | 4.90E-07 |
| $C(CH_2)_4CH_3^*+C\dot{S} \rightarrow CC(CH_2)_4CH_3\dot{S}+^*$   | 6.16E-09 |
| $CC(CH_2)_4CH_3\dot{S}+H^* \rightarrow CCH(CH_2)_4CH_3\dot{S}+^*$ | 1.36E-07 |
| $CCH(CH_2)_4CH_3\dot{S}+2H^* \rightarrow C_7H_{14}^*+^*+S$        | 4.69E-03 |
| $C_7H_{14}^* \rightarrow C_7H_{14}+^*$                            | 6.14E-14 |
| $CCH(CH_2)_4CH_3\dot{S}+H^* \rightarrow C(CH_2)_5CH_3\dot{S}+^*$  | 1.80E-08 |
| $C(CH_2)_5CH_3\dot{S}+^* \rightarrow C(CH_2)_5CH_3^*+S$           | 1.33E-07 |
| $C(CH_2)_5CH_3^*+C\dot{S} \rightarrow CC(CH_2)_5CH_3\dot{S}+^*$   | 1.75E-09 |
| $CC(CH_2)_5CH_3\dot{S}+H^* \rightarrow CCH(CH_2)_5CH_3\dot{S}+^*$ | 3.96E-08 |
| $CCH(CH_2)_5CH_3\dot{S}+2H^* \rightarrow C_8H_{16}^*+^*+S$        | 2.33E-03 |
| $C_8H_{16}^* \rightarrow C_8H_{16}+^*$                            | 2.98E-14 |

---

Figure S14. The steady-state rate in  $\ln(r)$  as a function of temperature for  $\text{H}_2\text{O}$  and  $\text{CO}_2$  formation.

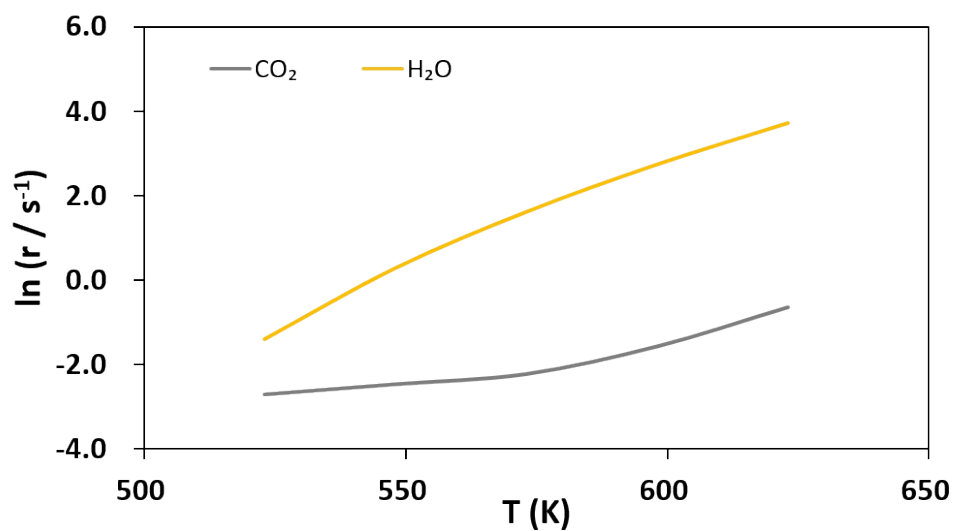

Figure S15. The apparent activation energies of  $\text{C}_2\text{H}_4$ ,  $\text{C}_5\text{H}_{10}$  and  $\text{C}_8\text{H}_{16}$ .

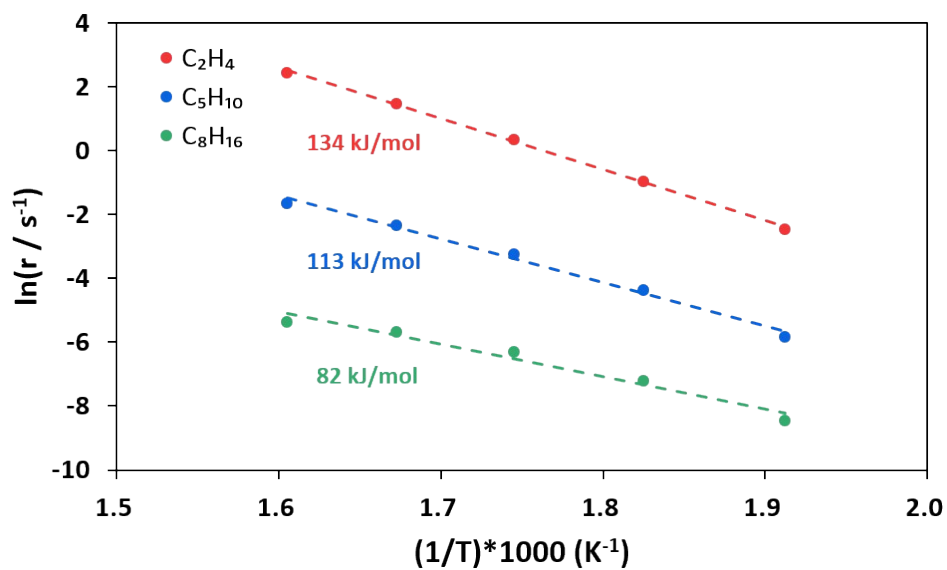

**Figure S16.** Influence of  $H_2$  partial pressure on FTY at 548 K. The pressures are set at 0.25, 0.01, 0.01 and 0.1 MPa for  $CO$ ,  $H_2O$ ,  $C_8H_{16}$  and the other products, respectively.

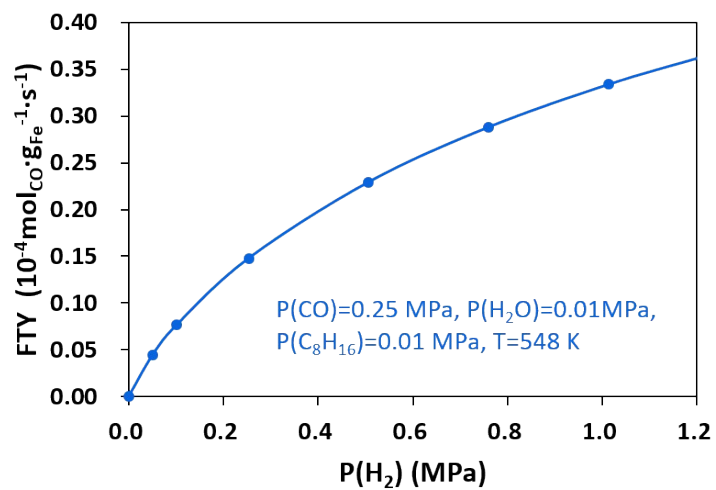



**Figure S17.** The reaction order of CO and H<sub>2</sub> calculated from the data in Figure 5e and Figure S16.

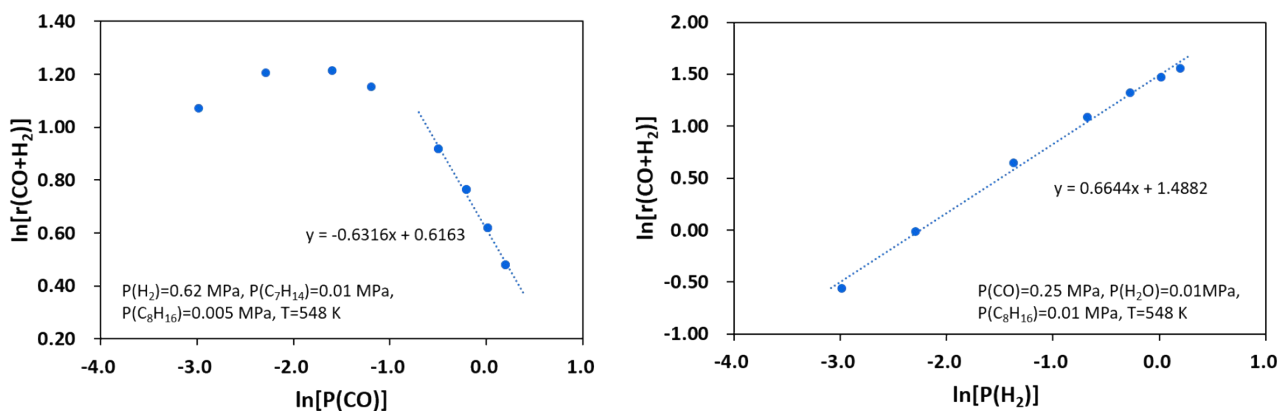

The reaction order of CO is positive at low CO pressure and then becomes negative with the increasing CO pressure. When CO partial pressure is higher than 0.6 MPa, the reaction order of CO is -0.63. The reaction order of H<sub>2</sub> is positive, being 0.66.

## 6. Properties of A-P5 sites

**Table S8.** TSs of C hydrogenation and CH diffusion, IS and TS of CO dissociation on the most reactive A-P5 sites in six surfaces.

| Surface                      | TS of C hydrogenation                                                               | TS of CH diffusion                                                                  | IS of CO dissociation                                                                | TS of CO dissociation                                                                 |
|------------------------------|-------------------------------------------------------------------------------------|-------------------------------------------------------------------------------------|--------------------------------------------------------------------------------------|---------------------------------------------------------------------------------------|
| $\text{Fe}_2\text{C}(111)$   | 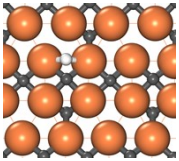   |    |    |    |
| $\text{Fe}_7\text{C}_3(071)$ |    |    |    |    |
| $\text{Fe}_5\text{C}_2(510)$ |    |    |    |    |
| $\text{Fe}_5\text{C}_2(021)$ |   |   |   |   |
| $\text{Fe}_3\text{C}(031)$   |  |  |  |  |
| $\text{Fe}_3\text{C}(102)$   |  |  |  |  |

**Figure S18.** Relation between the reaction barrier and the descriptor of Fe-C coordination number (CN). The barriers of CH diffusion  $G_a(\text{TS2})$  and CO dissociation  $G_a(\text{TS3})$  are linearly related to  $\Delta\text{CN}$  and  $\text{CN}(\text{A-P5})$ , respectively.

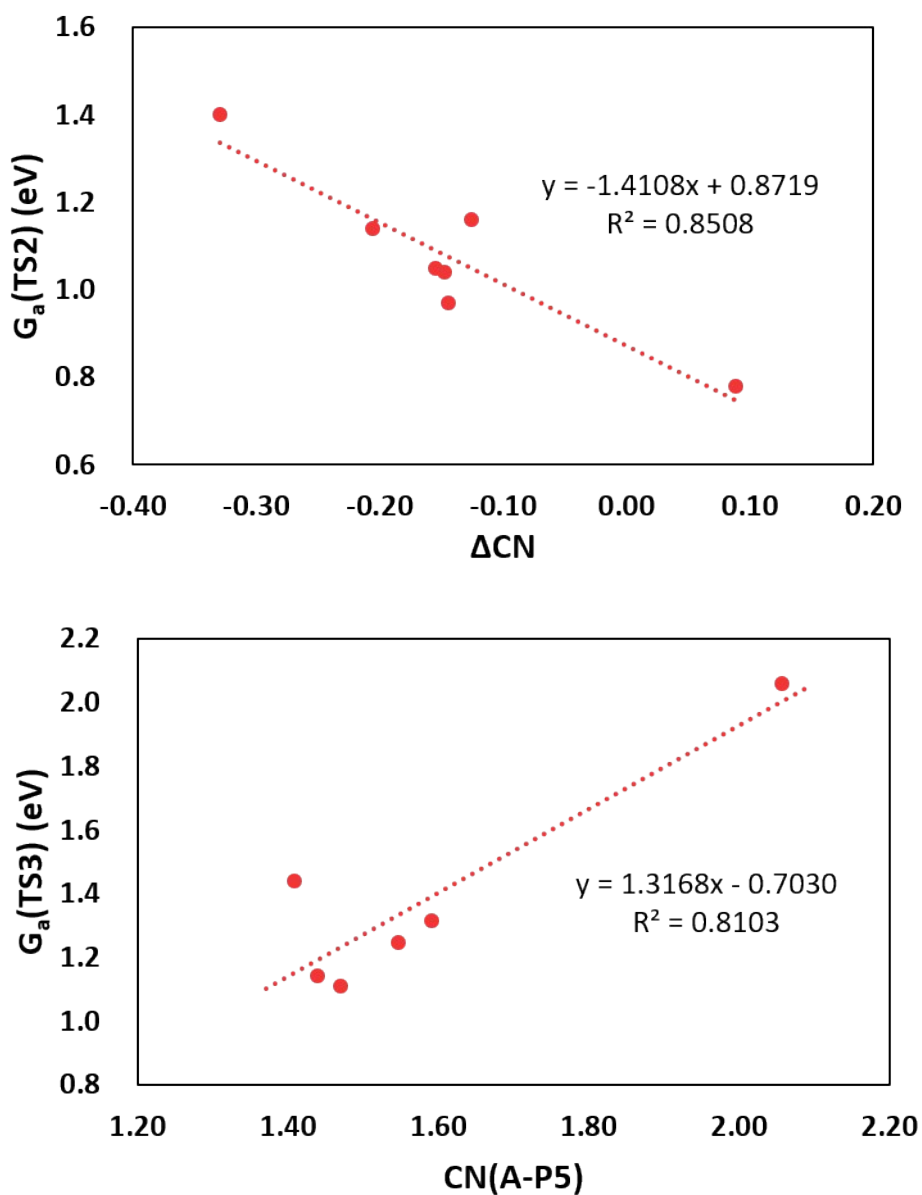

## 7. Interface structures

**Figure S19.** Other interface structures between the most stable surfaces of  $\text{Fe}_3\text{C}$ ,  $\text{Fe}_5\text{C}_2$ ,  $\text{Fe}_7\text{C}_3$  and

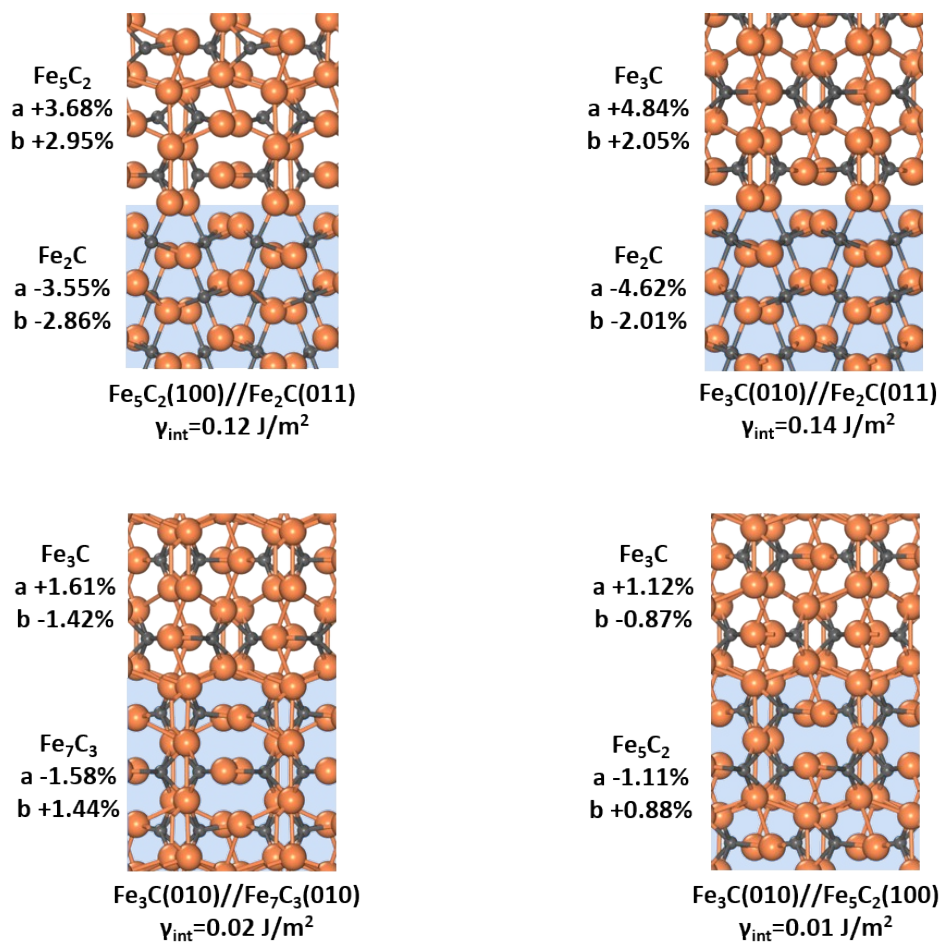

$\text{Fe}_2\text{C}$ , i.e.  $\text{Fe}_3\text{C}(010)$ ,  $\text{Fe}_5\text{C}_2(100)$ ,  $\text{Fe}_7\text{C}_3(010)$  and  $\text{Fe}_2\text{C}(011)$ .

## Reference:

- 1 S.-D. Huang, C. Shang, X.-J. Zhang and Z.-P. Liu, *Chem. Sci.* **2017**, *8*, 6327-6337.
- 2 S.-D. Huang, C. Shang, P.-L. Kang and Z.-P. Liu, *Chem. Sci.* **2018**, *9*, 8644-8655.
- 3 J. Behler and M. Parrinello, *Phys. Rev. Lett.* **2007**, *98*, 146401.
- 4 J. Behler, *J. Phys. Condens. Mat.* **2014**, *26*, 183001.
- 5 C. Shang and Z.-P. Liu, *J. Chem. Theory Comput.* **2013**, *9*, 1838-1845.
- 6 X.-J. Zhang, C. Shang and Z.-P. Liu, *J. Chem. Theory Comput.* **2013**, *9*, 3252-3260.
- 7 C. Shang, X.-J. Zhang and Z.-P. Liu, *Phys. Chem. Chem. Phys.* **2014**, *16*, 17845-17856.
- 8 H. Zhao, J.-X. Liu, C. Yang, S. Yao, H.-Y. Su, Z. Gao, M. Dong, J. Wang, A. I. Rykov, J. Wang, Y. Hou, W. Li and D. Ma, *CCS Chem.* **2021**, *3*, 2712–2724.
- 9 H. M. Torres Galvis, J. H. Bitter, C. B. Khare, M. Ruitenbeek, A. I. Dugulan and K. P. de Jong, *Science* **2012**, *335*, 835–838.
- 10 H. M. Torres Galvis, J. H. Bitter, T. Davidian, M. Ruitenbeek, A. I. Dugulan and K. P. de Jong, *J. Am. Chem. Soc.* **2012**, *134*, 16207–16215.
- 11 Q.-Y. Liu, C. Shang and Z.-P. Liu, *J. Am. Chem. Soc.* **2021**, *143*, 11109–11120.
- 12 Q.-Y. Liu, C. Shang and Z.-P. Liu, *J. Phys. Chem. Lett.* **2022**, *13*, 3342–3352.
- 13 C. T. Campbell, *ACS Catal.* **2017**, *7*, 2770–2779.
