# Supplementary material for: An optimal Fe–C coordination ensemble for hydrocarbon chain growth: a full Fischer–Tropsch synthesis mechanism from machine learning
Source: PubMed Central journal article supplement — Chem Sci. 2023 Aug 11;14(35):9461–75. doi: 10.1039/d3sc02054a (PMC10498498; doi:10.1039/d3sc02054a), 2023-08-11
Supplement: SC-014-D3SC02054A-s002.pdf [file SC-014-D3SC02054A-s002.pdf]

## XYZ Coordinates for the configurations

### 1. Surface

# Fe<sub>2</sub>C(111)

1.000000000000

10.94560000 0.00000000 0.00000000

2.91646064 9.85136200 0.00000000

0.00000004 0.00000003 22.33820000

C Fe

44 80

Cart

8.75428253 8.56045134 11.06790422

7.29605221 3.63477033 11.06790422

3.28148253 8.56045134 11.06790422

1.82325221 3.63477033 11.06790422

6.02868044 8.46772381 10.88273308

4.57045013 3.54204280 10.88273308

11.50148044 8.46772381 10.88273308

10.04325013 3.54204280 10.88273308

8.71629626 6.41309755 9.69072998

7.25806595 1.48741655 9.69072998

3.24349626 6.41309755 9.69072998

1.78526595 1.48741655 9.69072998

7.42287539 9.60750802 8.64319703

5.96464507 4.68182701 8.64319703

12.89567539 9.60750802 8.64319703

11.43744507 4.68182701 8.64319703

8.69960883 2.82528651 7.59376644

4.68503914 7.75096752 7.59376644

3.22680883 2.82528651 7.59376644

10.15783914 7.75096752 7.59376644

7.44045385 5.86758695 6.53346587

5.98222353 0.94190595 6.53346587

1.96765385 5.86758695 6.53346587

0.50942353 0.94190595 6.53346587

6.18124440 8.91008113 5.47339490

4.72301409 3.98440012 5.47339490

11.65404440 8.91008113 5.47339490

10.19581409 3.98440012 5.47339490

8.91616173 7.05424482 4.42384453

7.45793141 2.12856381 4.42384453

3.44336172 7.05424482 4.42384453

1.98513141 2.12856381 4.42384453

|             |            |             |
|-------------|------------|-------------|
| 6.16477817  | 5.32385880 | 3.37705773  |
| 4.70654786  | 0.39817779 | 3.37705773  |
| 11.63757817 | 5.32385880 | 3.37705773  |
| 10.17934786 | 0.39817779 | 3.37705773  |
| 8.85213564  | 3.26925706 | 2.18423498  |
| 4.83756595  | 8.19493807 | 2.18423498  |
| 3.37933564  | 3.26925706 | 2.18423498  |
| 10.31036595 | 8.19493807 | 2.18423498  |
| 7.58465674  | 8.10247454 | 1.99986387  |
| 6.12642643  | 3.17679353 | 1.99986387  |
| 13.05745674 | 8.10247454 | 1.99986387  |
| 11.59922643 | 3.17679353 | 1.99986387  |
| 7.41517833  | 7.19804643 | 10.85070551 |
| 5.95694802  | 2.27236543 | 10.85070551 |
| 12.88797833 | 7.19804643 | 10.85070551 |
| 11.42974802 | 2.27236543 | 10.85070551 |
| 8.64758887  | 2.26380259 | 10.84205292 |
| 4.63301918  | 7.18948360 | 10.84205292 |
| 3.17478887  | 2.26380259 | 10.84205292 |
| 10.10581918 | 7.18948360 | 10.84205292 |
| 8.68298402  | 4.77492230 | 10.61960547 |
| 4.66841434  | 9.70060330 | 10.61960547 |
| 3.21018402  | 4.77492230 | 10.61960547 |
| 10.14121434 | 9.70060330 | 10.61960547 |
| 7.40085242  | 9.73209893 | 10.52574638 |
| 5.94262210  | 4.80641793 | 10.52574638 |
| 12.87365242 | 9.73209893 | 10.52574638 |
| 11.41542210 | 4.80641793 | 10.52574638 |
| 8.78975245  | 8.23400849 | 8.86474812  |
| 7.33152214  | 3.30832749 | 8.86474812  |
| 3.31695245  | 8.23400849 | 8.86474812  |
| 1.85872214  | 3.30832749 | 8.86474812  |
| 6.06064062  | 8.25610073 | 8.86140783  |
| 4.60241031  | 3.33041973 | 8.86140783  |
| 11.53344062 | 8.25610073 | 8.86140783  |
| 10.07521031 | 3.33041973 | 8.86140783  |
| 7.32388407  | 6.01742230 | 8.44636323  |
| 5.86565376  | 1.09174129 | 8.44636323  |
| 1.85108407  | 6.01742230 | 8.44636323  |
| 0.39285376  | 1.09174129 | 8.44636323  |
| 8.61764163  | 1.09771184 | 8.42932316  |
| 4.60307195  | 6.02339284 | 8.42932316  |
| 3.14484163  | 1.09771184 | 8.42932316  |
| 10.07587195 | 6.02339284 | 8.42932316  |

|             |            |            |
|-------------|------------|------------|
| 7.54826274  | 9.44966250 | 6.72802327 |
| 6.09003243  | 4.52398149 | 6.72802327 |
| 13.02106274 | 9.44966250 | 6.72802327 |
| 11.56283243 | 4.52398149 | 6.72802327 |
| 8.82109357  | 4.51898944 | 6.70537141 |
| 4.80652388  | 9.44467045 | 6.70537141 |
| 3.34829357  | 4.51898944 | 6.70537141 |
| 10.27932388 | 9.44467045 | 6.70537141 |
| 6.05979860  | 7.21628821 | 6.36197433 |
| 4.60156828  | 2.29060720 | 6.36197433 |
| 11.53259860 | 7.21628821 | 6.36197433 |
| 10.07436828 | 2.29060720 | 6.36197433 |
| 8.79067986  | 7.21139122 | 6.33930088 |
| 7.33244954  | 2.28571021 | 6.33930088 |
| 3.31787986  | 7.21139122 | 6.33930088 |
| 1.85964954  | 2.28571021 | 6.33930088 |
| 8.81911022  | 0.78674274 | 4.63805664 |
| 4.80454053  | 5.71242375 | 4.63805664 |
| 3.34631022  | 0.78674274 | 4.63805664 |
| 10.27734053 | 5.71242375 | 4.63805664 |
| 7.55727780  | 5.71838543 | 4.62066149 |
| 6.09904749  | 0.79270443 | 4.62066149 |
| 2.08447780  | 5.71838543 | 4.62066149 |
| 0.62624749  | 0.79270443 | 4.62066149 |
| 8.82021301  | 3.47978425 | 4.20587525 |
| 4.80564333  | 8.40546526 | 4.20587525 |
| 3.34741301  | 3.47978425 | 4.20587525 |
| 10.27844332 | 8.40546526 | 4.20587525 |
| 7.54940773  | 8.42789950 | 4.20249926 |
| 6.09117742  | 3.50221850 | 4.20249926 |
| 13.02220773 | 8.42789950 | 4.20249926 |
| 11.56397742 | 3.50221850 | 4.20249926 |
| 8.93827423  | 6.93054899 | 2.54134577 |
| 7.48004392  | 2.00486799 | 2.54134577 |
| 3.46547423  | 6.93054899 | 2.54134577 |
| 2.00724392  | 2.00486799 | 2.54134577 |
| 6.19786617  | 6.96187760 | 2.44749202 |
| 4.73963586  | 2.03619660 | 2.44749202 |
| 11.67066617 | 6.96187760 | 2.44749202 |
| 10.21243586 | 2.03619660 | 2.44749202 |
| 6.23309397  | 9.47347000 | 2.22578799 |
| 4.77486366  | 4.54778900 | 2.22578799 |
| 11.70589397 | 9.47347000 | 2.22578799 |
| 10.24766366 | 4.54778900 | 2.22578799 |

|            |            |            |
|------------|------------|------------|
| 8.92396109 | 9.46470958 | 2.21652769 |
| 7.46573078 | 4.53902858 | 2.21652769 |
| 3.45116109 | 9.46470958 | 2.21652769 |
| 1.99293078 | 4.53902858 | 2.21652769 |

# Fe<sub>7</sub>C<sub>3</sub>(071)

1.000000000000

|            |             |             |
|------------|-------------|-------------|
| 9.92520000 | 0.00000000  | 0.00000000  |
| 0.00000006 | 35.68530000 | 0.00000000  |
| 0.00000004 | 0.00000004  | 22.83590000 |

|     |     |
|-----|-----|
| C   | Fe  |
| 104 | 224 |

Cart

|            |             |            |
|------------|-------------|------------|
| 8.26336538 | 21.24066367 | 7.59172788 |
| 3.30076538 | 21.24066367 | 7.59172788 |
| 5.94963745 | 3.41179813  | 7.59134295 |
| 0.98703745 | 3.41179813  | 7.59134295 |
| 9.04369778 | 34.01738290 | 7.48923946 |
| 4.08109778 | 34.01738290 | 7.48923946 |
| 5.16726094 | 16.14089067 | 7.44290395 |
| 0.20466095 | 16.14089067 | 7.44290395 |
| 9.01996622 | 23.89403096 | 7.43125701 |
| 4.05736622 | 23.89403096 | 7.43125701 |
| 5.19082608 | 6.05212919  | 7.36365754 |
| 0.22822608 | 6.05212919  | 7.36365754 |
| 5.98502975 | 28.92987343 | 7.33153213 |
| 1.02242975 | 28.92987343 | 7.33153213 |
| 8.23079223 | 11.06439611 | 7.24218480 |
| 3.26819223 | 11.06439611 | 7.24218480 |
| 7.71638684 | 18.65732592 | 6.61879414 |
| 2.75378684 | 18.65732592 | 6.61879414 |
| 6.49400736 | 0.82865618  | 6.61444674 |
| 1.53140736 | 0.82865618  | 6.61444674 |
| 8.49745900 | 31.40970482 | 6.38747464 |
| 3.53485900 | 31.40970482 | 6.38747464 |
| 6.51710079 | 26.23850534 | 6.35420596 |
| 1.55450079 | 26.23850534 | 6.35420596 |
| 5.71483196 | 13.54794023 | 6.31751887 |
| 0.75223195 | 13.54794023 | 6.31751887 |
| 7.69785709 | 8.37875306  | 6.25799731 |
| 2.73525709 | 8.37875306  | 6.25799731 |
| 8.94135981 | 2.34696426  | 5.77013822 |
| 3.97875981 | 2.34696426  | 5.77013822 |

|            |             |            |
|------------|-------------|------------|
| 5.27037859 | 20.17525213 | 5.76936190 |
| 0.30777859 | 20.17525213 | 5.76936190 |
| 6.03823606 | 32.94860877 | 5.65820369 |
| 1.07563606 | 32.94860877 | 5.65820369 |
| 8.17389662 | 15.07676733 | 5.59833441 |
| 3.21129662 | 15.07676733 | 5.59833441 |
| 8.98212214 | 27.78034703 | 5.42706081 |
| 4.01952214 | 27.78034703 | 5.42706081 |
| 5.23318172 | 9.91703369  | 5.33412877 |
| 0.27058172 | 9.91703369  | 5.33412877 |
| 7.74798269 | 22.76644283 | 4.53934559 |
| 2.78538269 | 22.76644283 | 4.53934559 |
| 6.46404511 | 4.90274983  | 4.46615249 |
| 1.50144511 | 4.90274983  | 4.46615249 |
| 8.52568972 | 35.47055436 | 4.27843838 |
| 3.56308972 | 35.47055436 | 4.27843838 |
| 5.68627566 | 17.62737041 | 4.27591615 |
| 0.72367566 | 17.62737041 | 4.27591615 |
| 6.47025795 | 30.29454763 | 4.06855897 |
| 1.50765795 | 30.29454763 | 4.06855897 |
| 7.74533481 | 12.43760244 | 3.99355861 |
| 2.78273481 | 12.43760244 | 3.99355861 |
| 5.26389769 | 24.27008098 | 3.84194806 |
| 0.30129769 | 24.27008098 | 3.84194806 |
| 8.95161105 | 6.41329904  | 3.76923447 |
| 3.98901105 | 6.41329904  | 3.76923447 |
| 6.04443627 | 1.23642718  | 3.56092490 |
| 1.08183627 | 1.23642718  | 3.56092490 |
| 8.16751626 | 19.07971660 | 3.55939224 |
| 3.20491626 | 19.07971660 | 3.55939224 |
| 8.94525255 | 31.80489869 | 3.37275897 |
| 3.98265255 | 31.80489869 | 3.37275897 |
| 5.26688885 | 13.94100003 | 3.29653154 |
| 0.30428885 | 13.94100003 | 3.29653154 |
| 7.71447398 | 26.79121873 | 2.50218212 |
| 2.75187398 | 26.79121873 | 2.50218212 |
| 6.50074765 | 8.92696367  | 2.40929494 |
| 1.53814765 | 8.92696367  | 2.40929494 |
| 5.69244858 | 21.63088854 | 2.23776017 |
| 0.72984858 | 21.63088854 | 2.23776017 |
| 8.51956025 | 3.75842252  | 2.18092976 |
| 3.55696025 | 3.75842252  | 2.18092976 |
| 6.46011556 | 34.36037323 | 2.06877628 |
| 1.49751556 | 34.36037323 | 2.06877628 |

|            |             |            |
|------------|-------------|------------|
| 7.75174215 | 16.53184786 | 2.06607582 |
| 2.78914215 | 16.53184786 | 2.06607582 |
| 5.21651826 | 28.32942525 | 1.57859967 |
| 0.25391826 | 28.32942525 | 1.57859967 |
| 8.19594949 | 23.15982144 | 1.51816510 |
| 3.23334949 | 23.15982144 | 1.51816510 |
| 8.99840217 | 10.46855759 | 1.48157489 |
| 4.03580217 | 10.46855759 | 1.48157489 |
| 6.01616274 | 5.29777343  | 1.45159515 |
| 1.05356274 | 5.29777343  | 1.45159515 |
| 8.97540140 | 0.19396098  | 1.22511777 |
| 4.01280140 | 0.19396098  | 1.22511777 |
| 5.23507690 | 18.04988382 | 1.21666097 |
| 0.27247690 | 18.04988382 | 1.21666097 |
| 5.74937142 | 25.64377628 | 0.59408316 |
| 0.78677142 | 25.64377628 | 0.59408316 |
| 8.46630186 | 7.77666259  | 0.50537537 |
| 3.50370186 | 7.77666259  | 0.50537537 |
| 7.67208009 | 30.65644344 | 0.47405166 |
| 2.70948009 | 30.65644344 | 0.47405166 |
| 6.53864023 | 12.81296917 | 0.40425393 |
| 1.57604023 | 12.81296917 | 0.40425393 |
| 7.64847389 | 20.56662211 | 0.39356358 |
| 2.68587389 | 20.56662211 | 0.39356358 |
| 6.56241686 | 2.68989851  | 0.35016159 |
| 1.59981686 | 2.68989851  | 0.35016159 |
| 8.43080506 | 33.29645583 | 0.24890513 |
| 3.46820506 | 33.29645583 | 0.24890513 |
| 5.78209034 | 15.46652774 | 0.24363810 |
| 0.81949034 | 15.46652774 | 0.24363810 |
| 9.19501216 | 19.67425369 | 7.31575829 |
| 4.23241216 | 19.67425369 | 7.31575829 |
| 5.01875478 | 1.84743037  | 7.31215532 |
| 0.05615478 | 1.84743037  | 7.31215532 |
| 9.90761336 | 22.20114239 | 7.31149161 |
| 4.94501336 | 22.20114239 | 7.31149161 |
| 9.26878777 | 4.35800617  | 7.26334073 |
| 4.30618777 | 4.35800617  | 7.26334073 |
| 5.71655837 | 24.72257107 | 7.25507708 |
| 0.75395837 | 24.72257107 | 7.25507708 |
| 8.49554940 | 6.87495425  | 7.17997263 |
| 3.53294940 | 6.87495425  | 7.17997263 |
| 4.98343754 | 32.41577265 | 7.16798640 |
| 0.02083754 | 32.41577265 | 7.16798640 |

|            |             |            |
|------------|-------------|------------|
| 9.22724984 | 14.54400424 | 7.10580140 |
| 4.26464984 | 14.54400424 | 7.10580140 |
| 7.43989589 | 22.86425793 | 7.08924902 |
| 2.47729589 | 22.86425793 | 7.08924902 |
| 6.73910809 | 20.28941580 | 7.07404062 |
| 1.77650809 | 20.28941580 | 7.07404062 |
| 7.46891501 | 2.46220705  | 7.06500679 |
| 2.50631501 | 2.46220705  | 7.06500679 |
| 5.03934465 | 27.33259306 | 7.06231826 |
| 0.07674465 | 27.33259306 | 7.06231826 |
| 6.77203487 | 5.02233299  | 7.04625858 |
| 1.80943487 | 5.02233299  | 7.04625858 |
| 9.28043798 | 29.79919061 | 7.04369238 |
| 4.31783798 | 29.79919061 | 7.04369238 |
| 9.17630291 | 9.46967993  | 6.97008982 |
| 4.21370291 | 9.46967993  | 6.97008982 |
| 9.89923058 | 11.92996550 | 6.95466227 |
| 4.93663057 | 11.92996550 | 6.95466227 |
| 5.72401444 | 34.80235612 | 6.94897921 |
| 0.76141444 | 34.80235612 | 6.94897921 |
| 8.48401641 | 16.93836661 | 6.92744520 |
| 3.52141641 | 16.93836661 | 6.92744520 |
| 7.53771637 | 33.04879171 | 6.91229316 |
| 2.57511637 | 33.04879171 | 6.91229316 |
| 8.23284331 | 25.49358588 | 6.86693585 |
| 3.27024331 | 25.49358588 | 6.86693585 |
| 6.67523959 | 15.17922090 | 6.85526089 |
| 1.71263959 | 15.17922090 | 6.85526089 |
| 8.20754158 | 35.56521395 | 6.82652550 |
| 3.24494158 | 35.56521395 | 6.82652550 |
| 7.51193947 | 27.95494682 | 6.81795081 |
| 2.54933947 | 27.95494682 | 6.81795081 |
| 6.00523440 | 17.69898686 | 6.80747346 |
| 1.04263440 | 17.69898686 | 6.80747346 |
| 6.78008789 | 30.54832747 | 6.80112944 |
| 1.81748789 | 30.54832747 | 6.80112944 |
| 5.98167538 | 7.64257308  | 6.78575303 |
| 1.01907539 | 7.64257308  | 6.78575303 |
| 6.70373881 | 10.09324148 | 6.72500601 |
| 1.74113881 | 10.09324148 | 6.72500601 |
| 7.43412574 | 12.68162805 | 6.71482518 |
| 2.47152574 | 12.68162805 | 6.71482518 |
| 9.20237203 | 23.70755159 | 5.40883292 |
| 4.23977203 | 23.70755159 | 5.40883292 |

|            |             |            |
|------------|-------------|------------|
| 5.01308409 | 5.84924183  | 5.34079770 |
| 0.05048409 | 5.84924183  | 5.34079770 |
| 8.51906088 | 21.15058790 | 5.31551985 |
| 3.55646088 | 21.15058790 | 5.31551985 |
| 5.69214006 | 3.30105448  | 5.27256198 |
| 0.72954006 | 3.30105448  | 5.27256198 |
| 5.69756799 | 28.84294734 | 5.15830260 |
| 0.73496799 | 28.84294734 | 5.15830260 |
| 9.19456437 | 18.62646459 | 5.14401833 |
| 4.23196437 | 18.62646459 | 5.14401833 |
| 5.01407532 | 0.79063028  | 5.14372568 |
| 0.05147532 | 0.79063028  | 5.14372568 |
| 6.76620888 | 24.38803935 | 5.09559788 |
| 1.80360888 | 24.38803935 | 5.09559788 |
| 8.51767395 | 10.97877432 | 5.06713038 |
| 3.55507395 | 10.97877432 | 5.06713038 |
| 6.04738790 | 21.81046530 | 5.03561645 |
| 1.08478790 | 21.81046530 | 5.03561645 |
| 7.44646670 | 6.52852373  | 5.02240202 |
| 2.48386670 | 6.52852373  | 5.02240202 |
| 4.99213186 | 26.09685947 | 5.01962713 |
| 0.02953186 | 26.09685947 | 5.01962713 |
| 9.29808661 | 33.84390270 | 5.00723842 |
| 4.33548661 | 33.84390270 | 5.00723842 |
| 8.16216096 | 3.96219150  | 4.99311053 |
| 3.19956096 | 3.96219150  | 4.99311053 |
| 9.87730749 | 15.99081977 | 4.98028184 |
| 4.91470749 | 15.99081977 | 4.98028184 |
| 5.02290261 | 31.37835041 | 4.97056882 |
| 0.06030261 | 31.37835041 | 4.97056882 |
| 9.22343633 | 8.23339209  | 4.92743347 |
| 4.26083633 | 8.23339209  | 4.92743347 |
| 6.73236597 | 19.14408188 | 4.92022572 |
| 1.76976597 | 19.14408188 | 4.92022572 |
| 7.48115977 | 1.30721115  | 4.91817255 |
| 2.51855977 | 1.30721115  | 4.91817255 |
| 9.19301749 | 13.51872762 | 4.89841728 |
| 4.23041749 | 13.51872762 | 4.89841728 |
| 8.17385672 | 29.48135796 | 4.78835126 |
| 3.21125672 | 29.48135796 | 4.78835126 |
| 7.48259254 | 31.90981063 | 4.73331811 |
| 2.51999254 | 31.90981063 | 4.73331811 |
| 6.04087025 | 11.61688293 | 4.69608790 |
| 1.07827025 | 11.61688293 | 4.69608790 |



|            |             |            |
|------------|-------------|------------|
| 7.44944627 | 26.80861236 | 4.67166383 |
| 2.48684627 | 26.80861236 | 4.67166383 |
| 6.72851437 | 14.05093327 | 4.66445448 |
| 1.76591437 | 14.05093327 | 4.66445448 |
| 6.82729959 | 34.44319555 | 4.65723262 |
| 1.86469959 | 34.44319555 | 4.65723262 |
| 7.38339249 | 16.58570119 | 4.62418127 |
| 2.42079249 | 16.58570119 | 4.62418127 |
| 6.76483435 | 8.94656675  | 4.57739116 |
| 1.80223435 | 8.94656675  | 4.57739116 |
| 9.24612251 | 27.76138426 | 3.25910494 |
| 4.28352251 | 27.76138426 | 3.25910494 |
| 9.86456216 | 20.12158333 | 3.21128671 |
| 4.90196216 | 20.12158333 | 3.21128671 |
| 9.30861026 | 2.26415712  | 3.18260004 |
| 4.34601026 | 2.26415712  | 3.18260004 |
| 9.20960370 | 22.65670644 | 3.17134211 |
| 4.24700371 | 22.65670644 | 3.17134211 |
| 4.96812105 | 9.89896532  | 3.16456211 |
| 0.00552105 | 9.89896532  | 3.16456211 |
| 8.52204736 | 25.09100083 | 3.13968419 |
| 3.55944736 | 25.09100083 | 3.13968419 |
| 5.00124143 | 4.79749282  | 3.10531621 |
| 0.03864143 | 4.79749282  | 3.10531621 |
| 5.69257026 | 7.22604701  | 3.04871129 |
| 0.72997026 | 7.22604701  | 3.04871129 |
| 6.71159581 | 23.18894458 | 2.93729548 |
| 1.74899581 | 23.18894458 | 2.93729548 |
| 4.99990924 | 35.39979044 | 2.92138045 |
| 0.03730924 | 35.39979044 | 2.92138045 |
| 9.21372593 | 17.56302896 | 2.91521417 |
| 4.25112593 | 17.56302896 | 2.91521417 |
| 6.74204497 | 28.47463470 | 2.90913909 |
| 1.77944497 | 28.47463470 | 2.90913909 |
| 7.50425460 | 5.32887441  | 2.86831169 |
| 2.54165460 | 5.32887441  | 2.86831169 |
| 7.39597179 | 20.71646460 | 2.85523456 |
| 2.43337179 | 20.71646460 | 2.85523456 |
| 5.68090947 | 32.74534134 | 2.84602191 |
| 0.71830947 | 32.74534134 | 2.84602191 |
| 6.81670303 | 2.86332060  | 2.83223207 |
| 1.85410303 | 2.86332060  | 2.83223207 |
| 7.47344171 | 10.61064888 | 2.81618637 |
| 2.51084171 | 10.61064888 | 2.81618637 |

|            |             |            |
|------------|-------------|------------|
| 4.96522166 | 30.17957856 | 2.81534406 |
| 0.00262166 | 30.17957856 | 2.81534406 |
| 8.52880696 | 14.89672144 | 2.79970311 |
| 3.56620696 | 14.89672144 | 2.79970311 |
| 6.03629228 | 25.72915613 | 2.76887183 |
| 1.07369228 | 25.72915613 | 2.76887183 |
| 9.24757282 | 12.31955036 | 2.73988200 |
| 4.28497282 | 12.31955036 | 2.73988200 |
| 7.49534593 | 0.23115104  | 2.69592866 |
| 2.53274593 | 0.23115104  | 2.69592866 |
| 6.71328750 | 18.08060457 | 2.69163520 |
| 1.75068750 | 18.08060457 | 2.69163520 |
| 8.17882182 | 7.86441356  | 2.67880713 |
| 3.21622182 | 7.86441356  | 2.67880713 |
| 8.17355319 | 33.40652885 | 2.56622865 |
| 3.21095319 | 33.40652885 | 2.56622865 |
| 6.03776926 | 15.55654963 | 2.51983408 |
| 1.07516926 | 15.55654963 | 2.51983408 |
| 7.49447047 | 30.85872780 | 2.49740260 |
| 2.53187047 | 30.85872780 | 2.49740260 |
| 6.72108247 | 12.99988577 | 2.42674709 |
| 1.75848247 | 12.99988577 | 2.42674709 |
| 9.91520623 | 24.02647141 | 1.12085827 |
| 4.95260623 | 24.02647141 | 1.12085827 |
| 9.18486310 | 26.61507501 | 1.11099576 |
| 4.22226310 | 26.61507501 | 1.11099576 |
| 8.46302203 | 29.06586399 | 1.05157884 |
| 3.50042203 | 29.06586399 | 1.05157884 |
| 9.26125082 | 6.15852872  | 1.03676506 |
| 4.29865082 | 6.15852872  | 1.03676506 |
| 8.48655503 | 19.00840676 | 1.02832298 |
| 3.52395503 | 19.00840676 | 1.02832298 |
| 5.03053336 | 8.75192622  | 1.01839912 |
| 0.06793336 | 8.75192622  | 1.01839912 |
| 5.72628028 | 1.14241981  | 1.01343597 |
| 0.76368028 | 1.14241981  | 1.01343597 |
| 9.15640808 | 21.52841037 | 0.98082174 |
| 4.19380808 | 21.52841037 | 0.98082174 |
| 5.75150579 | 11.21341412 | 0.96905873 |
| 0.78890579 | 11.21341412 | 0.96905873 |
| 5.05627707 | 3.65851226  | 0.92646483 |
| 0.09367707 | 3.65851226  | 0.92646483 |
| 6.00252709 | 19.76895149 | 0.90823467 |
| 1.03992709 | 19.76895149 | 0.90823467 |

|            |             |            |
|------------|-------------|------------|
| 8.20531329 | 1.90535789  | 0.89102977 |
| 3.24271329 | 1.90535789  | 0.89102977 |
| 7.41772911 | 24.77801068 | 0.88141165 |
| 2.45512911 | 24.77801068 | 0.88141165 |
| 6.69496438 | 27.23859892 | 0.86630283 |
| 1.73236438 | 27.23859892 | 0.86630283 |
| 6.79909621 | 6.90754397  | 0.79373447 |
| 1.83649621 | 6.90754397  | 0.79373447 |
| 9.25337364 | 31.68568046 | 0.79212444 |
| 4.29077364 | 31.68568046 | 0.79212444 |
| 4.98772202 | 34.24595881 | 0.77425502 |
| 0.02512202 | 34.24595881 | 0.77425502 |
| 7.52056862 | 9.37412534  | 0.77404343 |
| 2.55796862 | 9.37412534  | 0.77404343 |
| 9.22045720 | 16.41781149 | 0.76148585 |
| 4.25785720 | 16.41781149 | 0.76148585 |
| 9.92118156 | 13.84284058 | 0.74572871 |
| 4.95858156 | 13.84284058 | 0.74572871 |
| 6.74570336 | 22.16354408 | 0.72981889 |
| 1.78310336 | 22.16354408 | 0.72981889 |
| 7.46471165 | 4.29149954  | 0.67112838 |
| 2.50211165 | 4.29149954  | 0.67112838 |
| 6.01418540 | 29.83354399 | 0.65751782 |
| 1.05158540 | 29.83354399 | 0.65751782 |
| 8.19782662 | 11.98442810 | 0.58064855 |
| 3.23522662 | 11.98442810 | 0.58064855 |
| 6.78728120 | 32.35036763 | 0.57577869 |
| 1.82468120 | 32.35036763 | 0.57577869 |
| 7.50002418 | 34.86104532 | 0.52685124 |
| 2.53742418 | 34.86104532 | 0.52685124 |
| 7.42630252 | 14.50589511 | 0.52376553 |
| 2.46370252 | 14.50589511 | 0.52376553 |
| 6.71374497 | 17.03293803 | 0.51961822 |
| 1.75114497 | 17.03293803 | 0.51961822 |

# Fe<sub>5</sub>C<sub>2</sub>(510)

1.000000000000

|             |             |             |
|-------------|-------------|-------------|
| 9.97980000  | 0.00000000  | 0.00000000  |
| -0.76395804 | 12.66177393 | 0.00000000  |
| 0.00000004  | 0.00000004  | 19.64040000 |

|    |    |
|----|----|
| C  | Fe |
| 36 | 80 |

Cart

|             |             |            |
|-------------|-------------|------------|
| 9.14727584  | 9.28801470  | 7.45666124 |
| 4.15737584  | 9.28801470  | 7.45666124 |
| 7.21803862  | 4.23686176  | 7.23123905 |
| 2.22813862  | 4.23686176  | 7.23123905 |
| 8.38448181  | 11.90871859 | 7.20680633 |
| 3.39458181  | 11.90871859 | 7.20680633 |
| 4.69062376  | 6.74122964  | 6.35755638 |
| -0.29927624 | 6.74122964  | 6.35755638 |
| 6.68416213  | 1.58919618  | 6.17284615 |
| 1.69426213  | 1.58919618  | 6.17284615 |
| 7.16890187  | 8.28279426  | 5.62693824 |
| 2.17900187  | 8.28279426  | 5.62693824 |
| 9.19720083  | 3.12319649  | 5.29942408 |
| 4.20730083  | 3.12319649  | 5.29942408 |
| 4.67276826  | 10.79822941 | 4.25586957 |
| -0.31713174 | 10.79822941 | 4.25586957 |
| 6.72418055  | 5.68025081  | 4.01882195 |
| 1.73428055  | 5.68025081  | 4.01882195 |
| 7.18376534  | 12.33997230 | 3.63601452 |
| 2.19386533  | 12.33997230 | 3.63601452 |
| 9.23116553  | 7.20425854  | 3.36082261 |
| 4.24126553  | 7.20425854  | 3.36082261 |
| 5.47292217  | 2.23055554  | 2.34193027 |
| 0.48302217  | 2.23055554  | 2.34193027 |
| 6.73540357  | 9.72874639  | 2.00704745 |
| 1.74550357  | 9.72874639  | 2.00704745 |
| 7.98876734  | 3.77819959  | 1.47019894 |
| 2.99886734  | 3.77819959  | 1.47019894 |
| 9.21347812  | 11.29064837 | 1.28800348 |
| 4.22357812  | 11.29064837 | 1.28800348 |
| 5.52626486  | 6.13002817  | 0.45987182 |
| 0.53636486  | 6.13002817  | 0.45987182 |
| 7.45328915  | 1.12937154  | 0.40848067 |
| 2.46338915  | 1.12937154  | 0.40848067 |
| 4.75647854  | 8.73880611  | 0.18583303 |
| -0.23342146 | 8.73880611  | 0.18583303 |
| 8.21533226  | 7.73841306  | 7.13833245 |
| 3.22543226  | 7.73841306  | 7.13833245 |
| 7.49863634  | 10.21301439 | 7.07945162 |
| 2.50873634  | 10.21301439 | 7.07945162 |
| 7.48897156  | 0.06261249  | 7.04241447 |
| 2.49907156  | 0.06261249  | 7.04241447 |
| 8.88651243  | 5.12024068  | 6.97274926 |
| 3.89661243  | 5.12024068  | 6.97274926 |

|             |             |            |
|-------------|-------------|------------|
| 4.98340989  | 10.89812518 | 6.91591333 |
| -0.00649011 | 10.89812518 | 6.91591333 |
| 8.17060532  | 2.65533424  | 6.90961165 |
| 3.18070532  | 2.65533424  | 6.90961165 |
| 5.67854845  | 8.36980533  | 6.90196390 |
| 0.68864845  | 8.36980533  | 6.90196390 |
| 6.40834893  | 5.86477336  | 6.75357631 |
| 1.41844893  | 5.86477336  | 6.75357631 |
| 5.68653655  | 3.28130403  | 6.69114834 |
| 0.69663655  | 3.28130403  | 6.69114834 |
| 4.95879567  | 0.84138419  | 6.66590003 |
| -0.03110433 | 0.84138419  | 6.66590003 |
| 8.22567818  | 11.73736681 | 5.18096541 |
| 3.23577818  | 11.73736681 | 5.18096541 |
| 8.88798741  | 9.20222016  | 5.06897254 |
| 3.89808741  | 9.20222016  | 5.06897254 |
| 7.50976442  | 4.20318010  | 5.05911156 |
| 2.51986442  | 4.20318010  | 5.05911156 |
| 8.18692726  | 6.72764271  | 4.94274967 |
| 3.19702726  | 6.72764271  | 4.94274967 |
| 5.66736900  | 12.41155385 | 4.89114397 |
| 0.67746900  | 12.41155385 | 4.89114397 |
| 8.20719200  | 1.46326591  | 4.83442296 |
| 3.21729200  | 1.46326591  | 4.83442296 |
| 6.38100766  | 9.87487060  | 4.80341903 |
| 1.39110766  | 9.87487060  | 4.80341903 |
| 5.71098065  | 7.27161609  | 4.72475739 |
| 0.72108065  | 7.27161609  | 4.72475739 |
| 5.01494479  | 4.84338766  | 4.71175888 |
| 0.02504479  | 4.84338766  | 4.71175888 |
| 5.74186255  | 2.18422383  | 4.51002444 |
| 0.75196255  | 2.18422383  | 4.51002444 |
| 8.92724451  | 3.16928099  | 3.13275412 |
| 3.93734451  | 3.16928099  | 3.13275412 |
| 9.65447774  | 0.51179240  | 2.92767386 |
| 4.66457774  | 0.51179240  | 2.92767386 |
| 8.19081638  | 10.75315178 | 2.92137328 |
| 3.20091637  | 10.75315178 | 2.92137328 |
| 7.52427827  | 8.16568472  | 2.89047266 |
| 2.53437827  | 8.16568472  | 2.89047266 |
| 6.46140326  | 3.88992115  | 2.81003309 |
| 1.47150326  | 3.88992115  | 2.81003309 |
| 8.23615357  | 5.59719332  | 2.75910422 |
| 3.24625357  | 5.59719332  | 2.75910422 |

|             |             |            |
|-------------|-------------|------------|
| 5.72548353  | 11.29866287 | 2.69921895 |
| 0.73558353  | 11.29866287 | 2.69921895 |
| 5.02271343  | 8.84247544  | 2.64073298 |
| 0.03281343  | 8.84247544  | 2.64073298 |
| 7.16234573  | 1.15467185  | 2.58495906 |
| 2.17244573  | 1.15467185  | 2.58495906 |
| 5.69094282  | 6.28061655  | 2.47308962 |
| 0.70104282  | 6.28061655  | 2.47308962 |
| 4.72644856  | 4.52631212  | 0.98044427 |
| -0.26345145 | 4.52631212  | 0.98044427 |
| 8.98416265  | 2.08401219  | 0.94984236 |
| 3.99426265  | 2.08401219  | 0.94984236 |
| 7.49692293  | 12.16127468 | 0.88189072 |
| 2.50702293  | 12.16127468 | 0.88189072 |
| 8.92881242  | 7.14167817  | 0.77916237 |
| 3.93891242  | 7.14167817  | 0.77916237 |
| 8.23179647  | 9.65808525  | 0.74752367 |
| 3.24189647  | 9.65808525  | 0.74752367 |
| 6.50168782  | 2.71004334  | 0.73384591 |
| 1.51178782  | 2.71004334  | 0.73384591 |
| 5.78449336  | 0.24636792  | 0.66762456 |
| 0.79459336  | 0.24636792  | 0.66762456 |
| 6.40908241  | 7.83185195  | 0.60482946 |
| 1.41918241  | 7.83185195  | 0.60482946 |
| 7.18588982  | 5.31081574  | 0.60368013 |
| 2.19598981  | 5.31081574  | 0.60368013 |
| 5.68450729  | 10.28863881 | 0.50651002 |
| 0.69460729  | 10.28863881 | 0.50651002 |

# Fe<sub>5</sub>C<sub>2</sub>(021)

1.000000000000

|             |            |             |
|-------------|------------|-------------|
| 14.90600000 | 0.00000000 | 0.00000000  |
| 0.42323971  | 8.40334839 | 0.00000000  |
| 0.00000004  | 0.00000004 | 23.05140000 |

|    |    |
|----|----|
| C  | Fe |
| 36 | 80 |

Cart

|             |            |            |
|-------------|------------|------------|
| 2.75646521  | 1.99626514 | 7.65560511 |
| 10.20946521 | 1.99626514 | 7.65560511 |
| 9.64700270  | 5.32959722 | 7.51000160 |
| 2.19400270  | 5.32959722 | 7.51000160 |
| 5.22986629  | 8.29276539 | 7.44564863 |
| 12.68286629 | 8.29276539 | 7.44564863 |

|             |            |            |
|-------------|------------|------------|
| 6.56138453  | 2.53673647 | 6.91688374 |
| 14.01438453 | 2.53673647 | 6.91688374 |
| 8.43273561  | 0.18709738 | 6.26556255 |
| 0.97973561  | 0.18709738 | 6.26556255 |
| 7.24885480  | 5.55160716 | 6.02103235 |
| 14.70185480 | 5.55160716 | 6.02103235 |
| 9.26233584  | 3.27987850 | 5.43731951 |
| 1.80933584  | 3.27987850 | 5.43731951 |
| 3.70732341  | 6.06579030 | 4.68927424 |
| 11.16032341 | 6.06579030 | 4.68927424 |
| 5.61106020  | 3.76776343 | 4.10395773 |
| 13.06406020 | 3.76776343 | 4.10395773 |
| 4.13102612  | 0.74511710 | 3.95206386 |
| 11.58402612 | 0.74511710 | 3.95206386 |
| 6.45910589  | 6.85157748 | 3.36946502 |
| 13.91210589 | 6.85157748 | 3.36946502 |
| 7.93326219  | 1.23396887 | 2.61950339 |
| 0.48026219  | 1.23396887 | 2.61950339 |
| 2.91558683  | 7.36299520 | 2.03468359 |
| 10.36858682 | 7.36299520 | 2.03468359 |
| 8.76163548  | 4.32674248 | 1.79040838 |
| 1.30863548  | 4.32674248 | 1.79040838 |
| 3.18085377  | 1.97663541 | 1.14063552 |
| 10.63385377 | 1.97663541 | 1.14063552 |
| 4.93311057  | 4.62204310 | 0.60898984 |
| 12.38611057 | 4.62204310 | 0.60898984 |
| 7.97210488  | 7.58761194 | 0.54751449 |
| 0.51910488  | 7.58761194 | 0.54751449 |
| 6.98546138  | 2.51763785 | 0.40115633 |
| 14.43846138 | 2.51763785 | 0.40115633 |
| 7.88178233  | 4.46920414 | 7.50119695 |
| 0.42878234  | 4.46920414 | 7.50119695 |
| 4.63486419  | 1.81891752 | 7.41730680 |
| 12.08786419 | 1.81891752 | 7.41730680 |
| 6.11543052  | 6.58807191 | 7.26021497 |
| 13.56843052 | 6.58807191 | 7.26021497 |
| 2.80096822  | 0.15230482 | 7.25002250 |
| 10.25396822 | 0.15230482 | 7.25002250 |
| 8.66825276  | 6.89952881 | 7.17834663 |
| 1.21525276  | 6.89952881 | 7.17834663 |
| 2.92251912  | 3.70772587 | 7.00846882 |
| 10.37551912 | 3.70772587 | 7.00846882 |
| 5.40389081  | 4.14171637 | 6.84938652 |
| 12.85689081 | 4.14171637 | 6.84938652 |

|             |            |            |
|-------------|------------|------------|
| 6.59133836  | 0.54671759 | 6.81963266 |
| 14.04433836 | 0.54671759 | 6.81963266 |
| 8.50960507  | 2.06343281 | 6.80839736 |
| 1.05660507  | 2.06343281 | 6.80839736 |
| 3.74410532  | 6.08189962 | 6.64940381 |
| 11.19710532 | 6.08189962 | 6.64940381 |
| 5.07039091  | 8.07346573 | 5.52693394 |
| 12.52339091 | 8.07346573 | 5.52693394 |
| 9.15923998  | 5.26831907 | 5.36941597 |
| 1.70623998  | 5.26831907 | 5.36941597 |
| 3.01603684  | 1.72679856 | 5.25191520 |
| 10.46903684 | 1.72679856 | 5.25191520 |
| 7.30423532  | 3.66739113 | 5.22668025 |
| 14.75723532 | 3.66739113 | 5.22668025 |
| 5.48194083  | 2.08152447 | 5.11808654 |
| 12.93494083 | 2.08152447 | 5.11808654 |
| 7.53235331  | 7.24923903 | 5.02331241 |
| 14.98535331 | 7.24923903 | 5.02331241 |
| 2.54947683  | 7.67295807 | 4.90352835 |
| 10.00247683 | 7.67295807 | 4.90352835 |
| 5.69399829  | 5.65366385 | 4.81242114 |
| 13.14699829 | 5.65366385 | 4.81242114 |
| 3.81125062  | 4.10779653 | 4.75386951 |
| 11.26425062 | 4.10779653 | 4.75386951 |
| 7.95020331  | 1.22586791 | 4.56230518 |
| 0.49720331  | 1.22586791 | 4.56230518 |
| 9.24510071  | 3.28775039 | 3.49441626 |
| 1.79210071  | 3.28775039 | 3.49441626 |
| 5.93108567  | 0.40572785 | 3.30346416 |
| 13.38408567 | 0.40572785 | 3.30346416 |
| 4.47159556  | 7.26234241 | 3.24290903 |
| 11.92459556 | 7.26234241 | 3.24290903 |
| 7.61672836  | 5.24388297 | 3.15383184 |
| 15.06972836 | 5.24388297 | 3.15383184 |
| 2.63376818  | 5.66717645 | 3.03582541 |
| 10.08676818 | 5.66717645 | 3.03582541 |
| 4.26076753  | 2.43179305 | 2.93866864 |
| 11.71376753 | 2.43179305 | 2.93866864 |
| 9.89125461  | 0.84577288 | 2.82996937 |
| 2.43825461  | 0.84577288 | 2.82996937 |
| 6.72640678  | 2.78669560 | 2.80400847 |
| 14.17940678 | 2.78669560 | 2.80400847 |
| 8.45943730  | 7.64924825 | 2.68994600 |
| 1.00643730  | 7.64924825 | 2.68994600 |



|             |            |            |
|-------------|------------|------------|
| 5.09631502  | 4.84222144 | 2.52809293 |
| 12.54931502 | 4.84222144 | 2.52809293 |
| 6.42297029  | 6.83616858 | 1.40942586 |
| 13.87597029 | 6.83616858 | 1.40942586 |
| 8.68565999  | 2.45029785 | 1.24810272 |
| 1.23265999  | 2.45029785 | 1.24810272 |
| 3.15018112  | 3.96655686 | 1.23820480 |
| 10.60318112 | 3.96655686 | 1.23820480 |
| 4.33920252  | 0.37170254 | 1.20792719 |
| 11.79220252 | 0.37170254 | 1.20792719 |
| 6.82007300  | 0.80580680 | 1.04853930 |
| 14.27307300 | 0.80580680 | 1.04853930 |
| 8.95301238  | 6.01934631 | 0.88174964 |
| 1.50001238  | 6.01934631 | 0.88174964 |
| 6.94090946  | 4.36216166 | 0.80574113 |
| 14.39390946 | 4.36216166 | 0.80574113 |
| 4.05270049  | 6.32821708 | 0.79609851 |
| 11.50570049 | 6.32821708 | 0.79609851 |
| 5.10706029  | 2.69428362 | 0.63864447 |
| 12.56006029 | 2.69428362 | 0.63864447 |
| 9.31387541  | 0.04532212 | 0.55626550 |
| 1.86087541  | 0.04532212 | 0.55626550 |

# Fe<sub>5</sub>C<sub>2</sub>(111)

1.000000000000

|             |             |             |
|-------------|-------------|-------------|
| 12.37300000 | 0.00000000  | 0.00000000  |
| -2.07134726 | 13.30634571 | 0.00000000  |
| 0.00000004  | 0.00000005  | 22.12540000 |

|    |     |
|----|-----|
| C  | Fe  |
| 64 | 136 |

Cart

|             |             |            |
|-------------|-------------|------------|
| -0.13578315 | 1.75836189  | 9.89400891 |
| 6.05071685  | 1.75836189  | 9.89400891 |
| -1.17145679 | 8.41153474  | 9.89400891 |
| 5.01504321  | 8.41153474  | 9.89400891 |
| 3.01727758  | 3.87820615  | 9.82306628 |
| 9.20377758  | 3.87820615  | 9.82306628 |
| 1.98160394  | 10.53137900 | 9.82306628 |
| 8.16810394  | 10.53137900 | 9.82306628 |
| -0.51487310 | 5.10367355  | 9.71998023 |
| 5.67162690  | 5.10367355  | 9.71998023 |
| -1.55054674 | 11.75684640 | 9.71998023 |
| 4.63595326  | 11.75684640 | 9.71998023 |

|             |             |            |
|-------------|-------------|------------|
| 3.06449542  | 0.19798554  | 9.35191432 |
| 9.25099542  | 0.19798554  | 9.35191432 |
| 2.02882178  | 6.85115839  | 9.35191432 |
| 8.21532178  | 6.85115839  | 9.35191432 |
| 0.58328012  | 5.76440303  | 6.94130397 |
| 6.76978012  | 5.76440303  | 6.94130397 |
| -0.45239352 | 12.41757588 | 6.94130397 |
| 5.73410648  | 12.41757588 | 6.94130397 |
| 4.28060010  | 1.03828795  | 6.72359696 |
| 10.46710010 | 1.03828795  | 6.72359696 |
| 3.24492645  | 7.69146081  | 6.72359696 |
| 9.43142646  | 7.69146081  | 6.72359696 |
| 1.29617924  | 2.07658644  | 6.61351546 |
| 7.48267924  | 2.07658644  | 6.61351546 |
| 0.26050560  | 8.72975929  | 6.61351546 |
| 6.44700560  | 8.72975929  | 6.61351546 |
| 3.94034426  | 4.02802448  | 6.25968196 |
| 10.12684426 | 4.02802448  | 6.25968196 |
| 2.90467062  | 10.68119733 | 6.25968196 |
| 9.09117062  | 10.68119733 | 6.25968196 |
| 2.23426325  | 2.90143398  | 3.87051158 |
| 8.42076325  | 2.90143398  | 3.87051158 |
| 1.19858961  | 9.55460683  | 3.87051158 |
| 7.38508961  | 9.55460683  | 3.87051158 |
| 4.87882202  | 4.85300752  | 3.51646118 |
| 11.06532202 | 4.85300752  | 3.51646118 |
| 3.84314838  | 11.50618037 | 3.51646118 |
| 10.02964838 | 11.50618037 | 3.51646118 |
| 1.89422261  | 5.89129596  | 3.40647146 |
| 8.08072261  | 5.89129596  | 3.40647146 |
| 0.85854897  | 12.54446881 | 3.40647146 |
| 7.04504897  | 12.54446881 | 3.40647146 |
| 5.59163241  | 1.16514631  | 3.18918617 |
| 11.77813241 | 1.16514631  | 3.18918617 |
| 4.55595877  | 7.81831916  | 3.18918617 |
| 10.74245877 | 7.81831916  | 3.18918617 |
| 4.14716344  | 0.07805078  | 0.77799783 |
| 10.33366344 | 0.07805078  | 0.77799783 |
| 3.11148979  | 6.73122363  | 0.77799783 |
| 9.29798979  | 6.73122363  | 0.77799783 |
| 0.50349241  | 1.82555237  | 0.41000686 |
| 6.68999241  | 1.82555237  | 0.41000686 |
| -0.53218123 | 8.47872522  | 0.41000686 |
| 5.65431877  | 8.47872522  | 0.41000686 |

|             |             |            |
|-------------|-------------|------------|
| 3.15748166  | 3.05093246  | 0.30731283 |
| 9.34398166  | 3.05093246  | 0.30731283 |
| 2.12180802  | 9.70410531  | 0.30731283 |
| 8.30830802  | 9.70410531  | 0.30731283 |
| 0.12411259  | 5.17102453  | 0.23606260 |
| 6.31061259  | 5.17102453  | 0.23606260 |
| -0.91156105 | 11.82419738 | 0.23606260 |
| 5.27493895  | 11.82419738 | 0.23606260 |
| 2.54354945  | 2.04107493  | 9.87759492 |
| 8.73004945  | 2.04107493  | 9.87759492 |
| 1.50787581  | 8.69424778  | 9.87759492 |
| 7.69437581  | 8.69424778  | 9.87759492 |
| 4.97311458  | 3.36040282  | 9.86635013 |
| 11.15961458 | 3.36040282  | 9.86635013 |
| 3.93744094  | 10.01357568 | 9.86635013 |
| 10.12394094 | 10.01357568 | 9.86635013 |
| 3.74450109  | 5.58053888  | 9.57944947 |
| 9.93100109  | 5.58053888  | 9.57944947 |
| 2.70882745  | 12.23371173 | 9.57944947 |
| 8.89532745  | 12.23371173 | 9.57944947 |
| 0.85516145  | 0.26007315  | 9.40128633 |
| 7.04166145  | 0.26007315  | 9.40128633 |
| -0.18051219 | 6.91324600  | 9.40128633 |
| 6.00598781  | 6.91324600  | 9.40128633 |
| 1.44926387  | 4.98590244  | 9.00041041 |
| 7.63576387  | 4.98590244  | 9.00041041 |
| 0.41359023  | 11.63907530 | 9.00041041 |
| 6.6009023   | 11.63907530 | 9.00041041 |
| 4.65131801  | 1.17912878  | 8.67155996 |
| 10.83781801 | 1.17912878  | 8.67155996 |
| 3.61564437  | 7.83230163  | 8.67155996 |
| 9.80214437  | 7.83230163  | 8.67155996 |
| 0.68655618  | 2.60587114  | 8.39307442 |
| 6.87305618  | 2.60587114  | 8.39307442 |
| -0.34911746 | 9.25904399  | 8.39307442 |
| 5.83738254  | 9.25904399  | 8.39307442 |
| 3.21661313  | 3.30777362  | 7.96096037 |
| 9.40311313  | 3.30777362  | 7.96096037 |
| 2.18093949  | 9.96094648  | 7.96096037 |
| 8.36743949  | 9.96094648  | 7.96096037 |
| 5.41769758  | 4.73125257  | 7.83073245 |
| 11.60419758 | 4.73125257  | 7.83073245 |
| 4.38202394  | 11.38442542 | 7.83073245 |
| 10.56852394 | 11.38442542 | 7.83073245 |

|             |             |            |
|-------------|-------------|------------|
| 2.50003429  | 0.76105554  | 7.55254770 |
| 8.68653429  | 0.76105554  | 7.55254770 |
| 1.46436065  | 7.41422839  | 7.55254770 |
| 7.65086065  | 7.41422839  | 7.55254770 |
| 3.22677048  | 5.71337528  | 6.97885688 |
| 9.41327048  | 5.71337528  | 6.97885688 |
| 2.19109684  | 12.36654813 | 6.97885688 |
| 8.37759684  | 12.36654813 | 6.97885688 |
| 0.18780405  | 0.46711117  | 6.86282790 |
| 6.37430405  | 0.46711117  | 6.86282790 |
| -0.84786959 | 7.12028403  | 6.86282790 |
| 5.33863041  | 7.12028403  | 6.86282790 |
| 5.33990828  | 2.65823955  | 6.45808026 |
| 11.52640828 | 2.65823955  | 6.45808026 |
| 4.30423464  | 9.31141240  | 6.45808026 |
| 10.49073464 | 9.31141240  | 6.45808026 |
| 1.32419325  | 4.06593715  | 6.34322142 |
| 7.51069325  | 4.06593715  | 6.34322142 |
| 0.28851960  | 10.71911001 | 6.34322142 |
| 6.47501960  | 10.71911001 | 6.34322142 |
| 3.05860575  | 2.30377879  | 5.60858490 |
| 9.24510575  | 2.30377879  | 5.60858490 |
| 2.02293211  | 8.95695164  | 5.60858490 |
| 8.20943211  | 8.95695164  | 5.60858490 |
| 5.37358463  | 5.05121233  | 5.39310502 |
| 11.56008463 | 5.05121233  | 5.39310502 |
| 4.33791099  | 11.70438518 | 5.39310502 |
| 10.52441099 | 11.70438518 | 5.39310502 |
| 1.34574291  | 6.42451242  | 5.24320976 |
| 7.53224291  | 6.42451242  | 5.24320976 |
| 0.31006927  | 13.07768527 | 5.24320976 |
| 6.49656927  | 13.07768527 | 5.24320976 |
| 4.82898434  | 0.50507162  | 4.88689076 |
| 11.01548434 | 0.50507162  | 4.88689076 |
| 3.79331070  | 7.15824447  | 4.88689076 |
| 9.97981070  | 7.15824447  | 4.88689076 |
| 0.80122125  | 1.87819923  | 4.73704658 |
| 6.98772125  | 1.87819923  | 4.73704658 |
| -0.23445240 | 8.53137208  | 4.73704658 |
| 5.95204760  | 8.53137208  | 4.73704658 |
| 3.11612786  | 4.62592205  | 4.52159329 |
| 9.30262786  | 4.62592205  | 4.52159329 |
| 2.08045421  | 11.27909490 | 4.52159329 |
| 8.26695421  | 11.27909490 | 4.52159329 |

|             |             |            |
|-------------|-------------|------------|
| 4.85071815  | 2.86369815  | 3.78704125 |
| 11.03721815 | 2.86369815  | 3.78704125 |
| 3.81504450  | 9.51687100  | 3.78704125 |
| 10.00154450 | 9.51687100  | 3.78704125 |
| 0.83500999  | 4.27133459  | 3.67187500 |
| 7.02150999  | 4.27133459  | 3.67187500 |
| -0.20066365 | 10.92450745 | 3.67187500 |
| 5.98583635  | 10.92450745 | 3.67187500 |
| -0.19919967 | 6.46236576  | 3.26705842 |
| 5.98730033  | 6.46236576  | 3.26705842 |
| -1.23487332 | 13.11553862 | 3.26705842 |
| 4.95162668  | 13.11553862 | 3.26705842 |
| 2.94809040  | 1.21606319  | 3.15154011 |
| 9.13459040  | 1.21606319  | 3.15154011 |
| 1.91241676  | 7.86923604  | 3.15154011 |
| 8.09891676  | 7.86923604  | 3.15154011 |
| 3.67501746  | 6.16859693  | 2.57775972 |
| 9.86151746  | 6.16859693  | 2.57775972 |
| 2.63934382  | 12.82176978 | 2.57775972 |
| 8.82584382  | 12.82176978 | 2.57775972 |
| 0.75723333  | 2.19821796  | 2.29912548 |
| 6.94373333  | 2.19821796  | 2.29912548 |
| -0.27844031 | 8.85139081  | 2.29912548 |
| 5.90805968  | 8.85139081  | 2.29912548 |
| 2.95838719  | 3.62169241  | 2.16933240 |
| 9.14488719  | 3.62169241  | 2.16933240 |
| 1.92271355  | 10.27486526 | 2.16933240 |
| 8.10921355  | 10.27486526 | 2.16933240 |
| 3.63175877  | 4.88769613  | 0.25251889 |
| 9.81825877  | 4.88769613  | 0.25251889 |
| 2.59608513  | 11.54086898 | 0.25251889 |
| 8.78258513  | 11.54086898 | 0.25251889 |
| 1.52397664  | 5.75025257  | 1.45817901 |
| 7.71047664  | 5.75025257  | 1.45817901 |
| 0.48830300  | 12.40342542 | 1.45817901 |
| 6.67480300  | 12.40342542 | 1.45817901 |
| 4.72550757  | 1.94347770  | 1.13008651 |
| 10.91200757 | 1.94347770  | 1.13008651 |
| 3.68983393  | 8.59665055  | 1.13008651 |
| 9.87633393  | 8.59665055  | 1.13008651 |
| 0.16853991  | 0.01628161  | 0.72841987 |
| 6.35503991  | 0.01628161  | 0.72841987 |
| -0.86713374 | 6.66945447  | 0.72841987 |
| 5.31936626  | 6.66945447  | 0.72841987 |

|             |             |            |
|-------------|-------------|------------|
| 2.43038744  | 1.34844888  | 0.55037775 |
| 8.61688744  | 1.34844888  | 0.55037775 |
| 1.39471380  | 8.00162173  | 0.55037775 |
| 7.58121380  | 8.00162173  | 0.55037775 |
| 5.48859604  | 4.32356104  | 1.73705692 |
| 11.67509604 | 4.32356104  | 1.73705692 |
| 4.45292240  | 10.97673389 | 1.73705692 |
| 10.63942240 | 10.97673389 | 1.73705692 |
| 1.20186109  | 3.56898680  | 0.26360171 |
| 7.38836109  | 3.56898680  | 0.26360171 |
| 0.16618745  | 10.22215965 | 0.26360171 |
| 6.35268745  | 10.22215965 | 0.26360171 |

# Fe<sub>3</sub>C(031)

1.000000000000

|             |             |             |
|-------------|-------------|-------------|
| 10.06780000 | 0.00000000  | 0.00000000  |
| 0.00000003  | 14.99310000 | 0.00000000  |
| 0.00000004  | 0.00000004  | 22.23570000 |

|    |    |
|----|----|
| C  | Fe |
| 40 | 96 |

Cart

|            |             |            |
|------------|-------------|------------|
| 3.33581958 | 9.93901126  | 7.64939125 |
| 8.36972037 | 9.93901063  | 7.64939070 |
| 1.00723939 | 2.44462252  | 7.64296826 |
| 6.04113905 | 2.44462223  | 7.64296832 |
| 4.09987548 | 12.57827736 | 7.59312183 |
| 9.13377616 | 12.57827639 | 7.59312199 |
| 0.24223475 | 5.08232425  | 7.58627108 |
| 5.27613440 | 5.08232504  | 7.58627042 |
| 1.55427276 | 14.88784013 | 6.51050952 |
| 6.58817262 | 14.88784057 | 6.51050931 |
| 2.78834442 | 7.39325411  | 6.50878839 |
| 7.82224340 | 7.39325393  | 6.50878879 |
| 0.27700685 | 8.92490044  | 5.70293141 |
| 5.31090757 | 8.92490069  | 5.70293124 |
| 4.06478046 | 1.43171416  | 5.69941795 |
| 9.09868022 | 1.43171408  | 5.69941737 |
| 2.79551536 | 11.47365883 | 4.47116655 |
| 7.82941525 | 11.47365878 | 4.47116669 |
| 1.54419257 | 3.97942742  | 4.46364247 |
| 6.57809290 | 3.97942762  | 4.46364304 |
| 0.27751192 | 13.07533816 | 3.96566563 |
| 5.31141213 | 13.07533806 | 3.96566567 |

|             |             |            |
|-------------|-------------|------------|
| 4.06180103  | 5.58181796  | 3.95859428 |
| 9.09569998  | 5.58181815  | 3.95859421 |
| 2.79130916  | 0.63184285  | 2.72906463 |
| 7.82520916  | 0.63184285  | 2.72906463 |
| 1.54535573  | 8.13231273  | 2.72313032 |
| 6.57925573  | 8.13231273  | 2.72313032 |
| 4.06785280  | 9.66406961  | 1.91907410 |
| 9.10175279  | 9.66406961  | 1.91907410 |
| 0.26797625  | 2.17058199  | 1.91625857 |
| 5.30187625  | 2.17058199  | 1.91625857 |
| 1.57854441  | 11.97409711 | 0.84189010 |
| 6.61244441  | 11.97409711 | 0.84189010 |
| 2.75741239  | 4.47900702  | 0.83368792 |
| 7.79131239  | 4.47900702  | 0.83368792 |
| 0.81482184  | 14.61165756 | 0.78635431 |
| 5.84872184  | 14.61165756 | 0.78635431 |
| 3.52061226  | 7.11864006  | 0.77661362 |
| 8.55451226  | 7.11864006  | 0.77661362 |
| 4.99272054  | 10.90808455 | 7.45929249 |
| 10.02661935 | 10.90808386 | 7.45929213 |
| 4.38344345  | 3.41245228  | 7.45227101 |
| 9.41734331  | 3.41245202  | 7.45227139 |
| 0.73919554  | 13.36828871 | 7.37315677 |
| 5.77309496  | 13.36828856 | 7.37315726 |
| 3.60246380  | 5.87152605  | 7.36719416 |
| 8.63636251  | 5.87152709  | 7.36719386 |
| 2.49549231  | 11.59067613 | 7.29625643 |
| 7.52939297  | 11.59067547 | 7.29625622 |
| 4.29175340  | 8.40794634  | 7.29762978 |
| 9.32565243  | 8.40794753  | 7.29762936 |
| 0.05078877  | 0.91302929  | 7.29553910 |
| 5.08468801  | 0.91302947  | 7.29553902 |
| 1.84678288  | 4.09584769  | 7.28888611 |
| 6.88068236  | 4.09584844  | 7.28888542 |
| 1.76916680  | 9.06501586  | 7.09663462 |
| 6.80306856  | 9.06501500  | 7.09663374 |
| 2.57377417  | 1.56934628  | 7.09320942 |
| 7.60767387  | 1.56934687  | 7.09320941 |
| 3.28092887  | 14.14715326 | 7.03007280 |
| 8.31482969  | 14.14715311 | 7.03007264 |
| 1.06120898  | 6.65106932  | 7.02509843 |
| 6.09511031  | 6.65106873  | 7.02509728 |
| 4.24111031  | 12.43045071 | 5.50781999 |
| 9.27501079  | 12.43045047 | 5.50782001 |

|             |             |            |
|-------------|-------------|------------|
| 0.09967912  | 4.93627341  | 5.50026974 |
| 5.13357989  | 4.93627385  | 5.50027027 |
| 3.59702367  | 9.96990179  | 5.48542838 |
| 8.63092366  | 9.96990088  | 5.48542957 |
| 0.74429776  | 2.47557691  | 5.48067754 |
| 5.77819799  | 2.47557756  | 5.48067745 |
| 1.09206508  | 10.66750398 | 5.20539338 |
| 6.12596586  | 10.66750361 | 5.20539326 |
| 3.24819392  | 3.17384721  | 5.19977790 |
| 8.28209291  | 3.17384742  | 5.19977719 |
| 1.83325834  | 13.09087733 | 5.19546440 |
| 6.86715858  | 13.09087692 | 5.19546394 |
| 0.02955142  | 14.78429959 | 5.18800609 |
| 5.06345118  | 14.78429984 | 5.18800634 |
| 4.30992253  | 7.28889004  | 5.18494279 |
| 9.34382107  | 7.28889079  | 5.18494364 |
| 2.50684053  | 5.59547316  | 5.18838553 |
| 7.54074001  | 5.59547313  | 5.18838518 |
| 1.81344019  | 8.01474477  | 4.88585605 |
| 6.84734066  | 8.01474438  | 4.88585687 |
| 2.52677832  | 0.51859988  | 4.88620640 |
| 7.56067887  | 0.51860044  | 4.88620563 |
| 0.00918142  | 9.04103988  | 3.54266272 |
| 5.04308142  | 9.04103988  | 3.54266272 |
| 4.32987586  | 1.54505514  | 3.54207018 |
| 9.36377586  | 1.54505514  | 3.54207018 |
| 4.34845778  | 11.46142514 | 3.23901360 |
| 9.38235778  | 11.46142514 | 3.23901360 |
| 2.54830413  | 9.76696481  | 3.24620375 |
| 7.58220413  | 9.76696481  | 3.24620375 |
| 1.79143322  | 2.27329987  | 3.24228414 |
| 6.82533322  | 2.27329987  | 3.24228414 |
| 5.02409751  | 3.96758047  | 3.23083026 |
| 10.05799751 | 3.96758047  | 3.23083026 |
| 3.60822974  | 13.88251509 | 3.22705915 |
| 8.64212974  | 13.88251509 | 3.22705915 |
| 0.73003615  | 6.39000861  | 3.22002510 |
| 5.76393615  | 6.39000861  | 3.22002510 |
| 1.07754811  | 14.57939366 | 2.94978844 |
| 6.11144811  | 14.57939366 | 2.94978844 |
| 3.26006399  | 7.08647723  | 2.94436823 |
| 8.29396399  | 7.08647723  | 2.94436823 |
| 1.72237339  | 12.11856813 | 2.92840370 |
| 6.75627339  | 12.11856813 | 2.92840370 |



|             |             |            |
|-------------|-------------|------------|
| 2.61565651  | 4.62633989  | 2.91964270 |
| 7.64955651  | 4.62633989  | 2.91964270 |
| 0.76246345  | 10.40605247 | 1.40558607 |
| 5.79636345  | 10.40605247 | 1.40558607 |
| 3.57397777  | 2.91102596  | 1.39963465 |
| 8.60787777  | 2.91102596  | 1.39963465 |
| 4.28322759  | 0.49661291  | 1.33552128 |
| 9.31712759  | 0.49661291  | 1.33552128 |
| 0.05220732  | 7.99454736  | 1.33009197 |
| 5.08610732  | 7.99454736  | 1.33009197 |
| 5.00888201  | 12.96122609 | 1.13939367 |
| 10.04278201 | 12.96122609 | 1.13939367 |
| 1.77243282  | 1.15037400  | 1.13561856 |
| 6.80633282  | 1.15037400  | 1.13561856 |
| 2.56385952  | 8.64926670  | 1.13208874 |
| 7.59775952  | 8.64926670  | 1.13208874 |
| 4.36085369  | 5.46748741  | 1.12869317 |
| 9.39475369  | 5.46748741  | 1.12869317 |
| 3.25199205  | 11.18562412 | 1.06188466 |
| 8.28589205  | 11.18562412 | 1.06188466 |
| 1.08420257  | 3.69017515  | 1.05508973 |
| 6.11810257  | 3.69017515  | 1.05508973 |
| 2.47195572  | 13.64442610 | 0.97683454 |
| 7.50585572  | 13.64442610 | 0.97683454 |
| 1.86463212  | 6.15024343  | 0.96754395 |
| 6.89853212  | 6.15024343  | 0.96754395 |

# Fe<sub>3</sub>C(102)

1.000000000000

|             |             |             |
|-------------|-------------|-------------|
| 11.01580000 | 0.00000000  | 0.00000000  |
| 0.00000002  | 13.40160000 | 0.00000000  |
| 0.00000004  | 0.00000004  | 22.47150000 |

|    |    |
|----|----|
| C  | Fe |
| 40 | 96 |

Cart

|            |             |            |
|------------|-------------|------------|
| 1.37564716 | 5.80022161  | 8.41471010 |
| 1.37563651 | 12.50098697 | 8.41470400 |
| 9.36760871 | 4.01945311  | 8.23748215 |
| 9.36759180 | 10.72020255 | 8.23746658 |
| 9.36825265 | 7.60733221  | 8.23450124 |
| 9.36827215 | 0.90652815  | 8.23449547 |
| 4.28462302 | 5.67301387  | 8.22658995 |
| 4.28461931 | 12.37381983 | 8.22658823 |

|             |             |            |
|-------------|-------------|------------|
| 3.33088310  | 9.16125800  | 7.61127661 |
| 3.33088579  | 2.46045397  | 7.61126931 |
| 6.33016399  | 9.18441580  | 6.91770692 |
| 6.33017864  | 2.48361892  | 6.91769269 |
| 7.67057147  | 5.81325179  | 6.82723255 |
| 7.67056789  | 12.51407372 | 6.82723025 |
| 10.72777154 | 5.81292686  | 6.26202819 |
| 10.72777553 | 12.51373203 | 6.26202770 |
| 9.78855866  | 9.16311855  | 5.35041846 |
| 9.78856854  | 2.46231909  | 5.35041718 |
| 3.10975807  | 5.80800754  | 4.78531914 |
| 3.10975462  | 12.50881198 | 4.78531704 |
| 1.76543348  | 9.15990695  | 4.79975795 |
| 1.76543696  | 2.45910416  | 4.79975471 |
| 6.09387890  | 5.81395018  | 4.26611105 |
| 6.09387890  | 12.51475018 | 4.26611105 |
| 5.16361487  | 9.16121344  | 3.32155531 |
| 5.16361487  | 2.46041344  | 3.32155531 |
| 8.21825661  | 9.16481899  | 2.76375622 |
| 8.21825661  | 2.46401899  | 2.76375622 |
| 9.56017274  | 5.83251587  | 2.68237725 |
| 9.56017274  | 12.53331587 | 2.68237725 |
| 1.54647672  | 5.81414400  | 1.97793262 |
| 1.54647672  | 12.51494400 | 1.97793262 |
| 0.58884206  | 9.02470272  | 1.35454480 |
| 0.58884206  | 2.32390272  | 1.35454480 |
| 6.51847017  | 4.25338048  | 1.35242224 |
| 6.51847017  | 10.95418048 | 1.35242224 |
| 6.52053362  | 7.37137265  | 1.35086732 |
| 6.52053362  | 0.67057265  | 1.35086732 |
| 3.50100755  | 9.15109508  | 1.15644596 |
| 3.50100755  | 2.45029508  | 1.15644596 |
| 8.79575018  | 5.81526301  | 8.42337478 |
| 8.79574436  | 12.51608033 | 8.42338340 |
| 2.77795541  | 7.04998593  | 8.15091685 |
| 2.77796846  | 0.34920023  | 8.15092239 |
| 2.72049347  | 4.49812420  | 8.14668871 |
| 2.72048387  | 11.19893433 | 8.14668669 |
| 6.17443279  | 5.82629268  | 8.13616750 |
| 6.17443259  | 12.52709244 | 8.13617297 |
| 7.50566076  | 3.72843210  | 7.85973994 |
| 7.50568282  | 10.42923475 | 7.85974278 |
| 7.50755231  | 7.91794239  | 7.84750483 |
| 7.50754124  | 1.21714944  | 7.84750859 |

|             |             |            |
|-------------|-------------|------------|
| 0.10734122  | 7.04172073  | 7.80224786 |
| 0.10731408  | 0.34094238  | 7.80225726 |
| 0.10213552  | 4.56950324  | 7.79609260 |
| 0.10217619  | 11.27032360 | 7.79609496 |
| 4.90352008  | 3.72170682  | 7.52785357 |
| 4.90351595  | 10.42249566 | 7.52784874 |
| 4.92416866  | 7.94035330  | 7.49402541 |
| 4.92416572  | 1.23954838  | 7.49403145 |
| 1.37134810  | 9.13884852  | 7.49310384 |
| 1.37134936  | 2.43805126  | 7.49309944 |
| 9.80374388  | 9.16057405  | 7.32182944 |
| 9.80376414  | 2.45973279  | 7.32181799 |
| 4.32797284  | 5.82456049  | 6.32398876 |
| 4.32797584  | 12.52534107 | 6.32399468 |
| 1.67750366  | 5.80946162  | 6.15670560 |
| 1.67750114  | 12.51023798 | 6.15670494 |
| 9.13458188  | 7.03106837  | 6.15033815 |
| 9.13458093  | 0.33026675  | 6.15032679 |
| 9.13300630  | 4.59401203  | 6.14874246 |
| 9.13300671  | 11.29478414 | 6.14874888 |
| 2.97383089  | 7.94632810  | 5.84693672 |
| 2.97383484  | 1.24552505  | 5.84693530 |
| 2.97430699  | 3.67835786  | 5.83409573 |
| 2.97430151  | 10.37914820 | 5.83409253 |
| 6.51953095  | 7.03332918  | 5.78067673 |
| 6.51403495  | 4.58572114  | 5.78666134 |
| 6.51403287  | 11.28651200 | 5.78665838 |
| 6.51953190  | 0.33252473  | 5.78066613 |
| 7.80184787  | 9.16452367  | 5.51917302 |
| 7.80183483  | 2.46372610  | 5.51916701 |
| 0.34938760  | 7.93862650  | 5.49587250 |
| 0.35206056  | 3.68611592  | 5.49989709 |
| 0.34938228  | 1.23781758  | 5.49587034 |
| 0.35206378  | 10.38690228 | 5.49989664 |
| 5.19930282  | 9.16455165  | 5.24876448 |
| 5.19930100  | 2.46375488  | 5.24876578 |
| 10.69425130 | 5.81395018  | 4.34699416 |
| 10.69425130 | 12.51475018 | 4.34699416 |
| 4.52206473  | 7.03530500  | 4.07911354 |
| 4.52206473  | 4.59259537  | 4.07911354 |
| 4.52206473  | 11.29339537 | 4.07911354 |
| 4.52206473  | 0.33450500  | 4.07911354 |
| 8.06567304  | 5.81395018  | 4.06464897 |
| 8.06567304  | 12.51475018 | 4.06464897 |

|             |             |            |
|-------------|-------------|------------|
| 9.37696287  | 7.94299537  | 3.78912746 |
| 9.37696287  | 3.68490500  | 3.78912746 |
| 9.37696287  | 1.24219537  | 3.78912746 |
| 9.37696287  | 10.38570500 | 3.78912746 |
| 1.91001427  | 7.02113783  | 3.74295779 |
| 1.91001427  | 0.32033783  | 3.74295779 |
| 1.90148330  | 4.59789475  | 3.73080103 |
| 1.90148330  | 11.29869475 | 3.73080103 |
| 6.75760949  | 7.94480470  | 3.43389642 |
| 6.75760949  | 1.24400470  | 3.43389642 |
| 6.75540514  | 3.67919854  | 3.43265677 |
| 6.75540514  | 10.37999854 | 3.43265677 |
| 3.20063016  | 9.15871133  | 3.42493280 |
| 3.20063016  | 2.45791133  | 3.42493280 |
| 0.55113074  | 9.17330823  | 3.25715287 |
| 0.55113074  | 2.47250823  | 3.25715287 |
| 6.07962203  | 5.81109571  | 2.26416255 |
| 6.07962203  | 12.51189571 | 2.26416255 |
| 10.96803149 | 4.59199304  | 2.08241646 |
| 10.96803149 | 11.29279304 | 2.08241646 |
| 3.50234206  | 5.78909201  | 2.07739244 |
| 3.50234206  | 12.48989201 | 2.07739244 |
| 10.98624651 | 7.07002148  | 2.05453286 |
| 10.98624651 | 0.36922148  | 2.05453286 |
| 4.76950123  | 7.92010060  | 1.78491966 |
| 4.76950123  | 1.21930060  | 1.78491966 |
| 4.76405426  | 3.68990979  | 1.78023999 |
| 4.76405426  | 10.39070979 | 1.78023999 |
| 8.38025972  | 4.57472405  | 1.73071469 |
| 8.38025972  | 11.27552405 | 1.73071469 |
| 8.38388660  | 7.07043256  | 1.72176306 |
| 8.38388660  | 0.36963256  | 1.72176306 |
| 9.71496361  | 9.17632898  | 1.45127758 |
| 9.71496361  | 2.47552898  | 1.45127758 |
| 2.15475452  | 7.85452439  | 1.43979469 |
| 2.15475452  | 1.15372439  | 1.43979469 |
| 2.09838193  | 3.69581854  | 1.43469210 |
| 2.09838193  | 10.39661854 | 1.43469210 |
| 7.10175299  | 9.16563392  | 1.17035198 |
| 7.10175299  | 2.46483392  | 1.17035198 |

# Fe<sub>3</sub>C(131)

1.000000000000

|             |             |             |
|-------------|-------------|-------------|
| 12.25530000 | 0.00000000  | 0.00000000  |
| -2.38850589 | 13.25166596 | 0.00000000  |
| 0.00000004  | 0.00000005  | 21.25600000 |

|    |    |
|----|----|
| C  | Fe |
| 44 | 96 |

Cart

|             |             |            |
|-------------|-------------|------------|
| 3.36503574  | 3.83424369  | 8.00177389 |
| 2.17078396  | 10.46004855 | 8.00175233 |
| 10.23824610 | 1.73393696  | 7.51389319 |
| 9.04399979  | 8.35974993  | 7.51388395 |
| 9.63361249  | 5.11765372  | 7.37708129 |
| 8.43936217  | 11.74348327 | 7.37706679 |
| 6.15933762  | 6.11830451  | 7.16127228 |
| 4.96510978  | 12.74414918 | 7.16127040 |
| 7.56444532  | 2.36544630  | 7.06717591 |
| 6.37019664  | 8.99125538  | 7.06717162 |
| 0.40189381  | 4.40720962  | 6.72726223 |
| -0.79228377 | 11.03304265 | 6.72727510 |
| 0.72431665  | 1.34286868  | 6.71874525 |
| -0.46994442 | 7.96869588  | 6.71873464 |
| 4.43284161  | 4.54432237  | 5.45083847 |
| 3.23858857  | 11.17015081 | 5.45084914 |
| 4.69920826  | 1.46983596  | 5.28991512 |
| 3.50494896  | 8.09565525  | 5.28991296 |
| 10.65320815 | 0.21186723  | 5.01276769 |
| 9.45895527  | 6.83769533  | 5.01276555 |
| 9.61846119  | 3.80479526  | 4.77013542 |
| 8.42420410  | 10.43062477 | 4.77014350 |
| 2.31291199  | 0.37301423  | 3.71090216 |
| 1.11865903  | 6.99884720  | 3.71090216 |
| 1.32024334  | 3.98045099  | 3.48570282 |
| 0.12599038  | 10.60628397 | 3.48570282 |
| 7.25680802  | 2.63475377  | 3.27525191 |
| 6.06255506  | 9.26058675  | 3.27525191 |
| 6.27615511  | 6.19979709  | 3.10429905 |
| 5.08190215  | 12.82563007 | 3.10429905 |
| 11.15591252 | 2.80662531  | 1.85426262 |
| 9.96165956  | 9.43245829  | 1.85426262 |
| 10.26668183 | 6.36503691  | 1.84332589 |
| 9.07242887  | 12.99086989 | 1.84332589 |
| 4.11546359  | 4.99648765  | 1.50322899 |
| 2.92121063  | 11.62232062 | 1.50322899 |
| 4.31588449  | 1.85071793  | 1.48528657 |
| 3.12163153  | 8.47655091  | 1.48528657 |

|             |             |            |
|-------------|-------------|------------|
| 1.00381878  | 5.67873004  | 1.17111504 |
| -0.19043418 | 12.30456301 | 1.17111504 |
| 1.64606686  | 2.42555158  | 1.06123795 |
| 0.45181390  | 9.05138456  | 1.06123795 |
| 8.50365986  | 0.27873533  | 0.54604718 |
| 7.30940690  | 6.90456830  | 0.54604718 |
| 2.16190112  | 2.33734436  | 7.74615936 |
| 0.96765824  | 8.96316640  | 7.74615610 |
| -0.42476597 | 2.69718585  | 7.48863817 |
| -1.61901866 | 9.32300000  | 7.48864217 |
| 3.95234273  | 0.42995750  | 7.35118106 |
| 2.75809310  | 7.05578633  | 7.35116473 |
| 4.52413284  | 5.24714129  | 7.28558868 |
| 3.32986667  | 11.87294376 | 7.28560510 |
| 9.19448616  | 3.29192687  | 7.34088309 |
| 8.00023959  | 9.91777305  | 7.34087469 |
| 0.36394297  | 6.30914682  | 7.14437418 |
| -0.83031625 | 12.93498676 | 7.14437875 |
| 11.20431999 | 0.24958486  | 6.92672377 |
| 10.01006184 | 6.87544066  | 6.92672594 |
| 6.61212664  | 3.96874573  | 6.91457972 |
| 5.41785483  | 10.59456252 | 6.91455907 |
| 2.23627848  | 4.65047283  | 6.81441761 |
| 1.04198287  | 11.27628836 | 6.81444134 |
| 8.65098378  | 0.81255322  | 6.84313452 |
| 7.45674464  | 7.43837999  | 6.84312787 |
| 4.25896632  | 2.86946856  | 6.65484819 |
| 3.06468811  | 9.49531722  | 6.65487343 |
| 6.23441947  | 1.12910738  | 6.52662671 |
| 5.04016441  | 7.75493100  | 6.52661356 |
| 10.93189035 | 4.64780484  | 6.02170638 |
| 9.73756748  | 11.27364484 | 6.02169801 |
| 8.48485738  | 5.20319997  | 5.78753085 |
| 7.29061122  | 11.82903018 | 5.78754055 |
| 0.80112390  | 2.96104006  | 5.48200484 |
| -0.39312250 | 9.58686523  | 5.48200336 |
| 2.62809933  | 1.26469459  | 5.49607171 |
| 1.43383908  | 7.89052565  | 5.49606020 |
| 10.47862991 | 2.15622514  | 5.39675138 |
| 9.28437936  | 8.78205920  | 5.39674514 |
| 6.00890710  | 5.70364611  | 5.29925703 |
| 4.81465230  | 12.32947528 | 5.29926040 |
| 7.98953482  | 2.70450427  | 5.15620900 |
| 6.79528382  | 9.33032518  | 5.15619280 |

|             |             |            |
|-------------|-------------|------------|
| 3.35182423  | 6.14719646  | 5.11424508 |
| 2.15757518  | 12.77302567 | 5.11426491 |
| 0.34298360  | 0.48706657  | 4.93275138 |
| -0.85126403 | 7.11289765  | 4.93274488 |
| 0.92305550  | 5.36917480  | 4.81770441 |
| -0.27119032 | 11.99500223 | 4.81770685 |
| 5.57365025  | 3.16513254  | 4.65288804 |
| 4.37940483  | 9.79096065  | 4.65287297 |
| 2.97787761  | 3.66058054  | 4.44366890 |
| 1.78361708  | 10.28641186 | 4.44367366 |
| 8.92109347  | 0.48566630  | 4.12896801 |
| 7.72684257  | 7.11149732  | 4.12895599 |
| 6.34998212  | 0.96901608  | 3.95198499 |
| 5.15572821  | 7.59485026  | 3.95197802 |
| 9.76671039  | 5.40936247  | 3.71097645 |
| 8.57245743  | 12.03519544 | 3.71097645 |
| -0.65484260 | 3.68870680  | 3.62123843 |
| -1.84909556 | 10.31453978 | 3.62123843 |
| 7.30014230  | 4.57573596  | 3.45908970 |
| 6.10588934  | 11.20156893 | 3.45908970 |
| 3.94268519  | 1.50069597  | 3.44737102 |
| 2.74843223  | 8.12652895  | 3.44737102 |
| 4.69885086  | 5.05109938  | 3.28788573 |
| 3.50459791  | 11.67693236 | 3.28788573 |
| 1.40509240  | 2.01450321  | 3.18216970 |
| 0.21083944  | 8.64033618  | 3.18216970 |
| 9.28441439  | 2.89875797  | 3.07764541 |
| 8.09016143  | 9.52459094  | 3.07764541 |
| 11.10470670 | 1.19581732  | 3.08856476 |
| 9.91045374  | 7.82165029  | 3.08856476 |
| 2.27633666  | 5.56089735  | 2.69547478 |
| 1.08208370  | 12.18673033 | 2.69547478 |
| -0.23673893 | 6.12739290  | 2.55241003 |
| -1.43099189 | 12.75322587 | 2.55241003 |
| 5.68936019  | 2.97972054  | 2.12121331 |
| 4.49510723  | 9.60555352  | 2.12121331 |
| 7.63962321  | 1.24280357  | 1.88798441 |
| 6.44537026  | 7.86863654  | 1.88798441 |
| 3.21765000  | 3.35256592  | 1.74998804 |
| 2.02339705  | 9.97839890  | 1.74998804 |
| 8.41606614  | 6.08661360  | 1.74018732 |
| 7.22181318  | 12.71244657 | 1.74018732 |
| 5.30755531  | 0.30048524  | 1.67762645 |
| 4.11330235  | 6.92631822  | 1.67762645 |

|             |             |            |
|-------------|-------------|------------|
| 0.66523143  | 3.91109670  | 1.60902896 |
| -0.52902153 | 10.53692967 | 1.60902896 |
| 10.31909699 | 4.46215435  | 1.41221317 |
| 9.12484403  | 11.08798732 | 1.41221317 |
| 2.69262559  | 0.87311534  | 1.25545245 |
| 1.49837263  | 7.49894831  | 1.25545245 |
| 6.08439118  | 5.48753317  | 1.23569618 |
| 4.89013822  | 12.11336615 | 1.23569618 |
| 7.91476177  | 3.69234291  | 1.22194364 |
| 6.72050881  | 10.31817589 | 1.22194364 |
| 0.06142718  | 1.44478720  | 1.08450753 |
| -1.13282577 | 8.07062017  | 1.08450753 |
| 9.73022084  | 1.78445990  | 0.82899424 |
| 8.53596788  | 8.41029287  | 0.82899424 |

# Fe<sub>5</sub>C<sub>2</sub>(510) step

1.000000000000

|             |             |             |
|-------------|-------------|-------------|
| 9.97980000  | 0.00000000  | 0.00000000  |
| -0.76395804 | 12.66177393 | 0.00000000  |
| 0.00000004  | 0.00000004  | 19.64040000 |

|    |    |
|----|----|
| C  | Fe |
| 36 | 77 |

Cart

|             |             |            |
|-------------|-------------|------------|
| 4.69256664  | 1.87006002  | 7.57905530 |
| 5.50640881  | 9.29920613  | 7.49868099 |
| 7.18747223  | 4.11863741  | 7.13240407 |
| 2.18313815  | 4.17890081  | 7.16702176 |
| 2.98250097  | 6.82887457  | 7.12053827 |
| 7.87917096  | 6.82579068  | 7.09071060 |
| 4.57851059  | 11.95829075 | 6.66404757 |
| 2.61474404  | 10.06564558 | 6.09253694 |
| 1.92046633  | 1.27293365  | 6.29481212 |
| 7.69016318  | 10.06840444 | 6.10406467 |
| 8.09741710  | 0.41968874  | 6.60520266 |
| 0.40706299  | 8.77525869  | 5.96296997 |
| 4.16146519  | 3.11775619  | 5.22313061 |
| 9.16608118  | 3.09579603  | 5.22233835 |
| -0.31152314 | 10.88365217 | 4.25587159 |
| 4.70445978  | 10.62824800 | 4.15255738 |
| 6.70764085  | 5.63412921  | 4.03791096 |
| 1.70671187  | 5.66262167  | 4.02072069 |
| 2.22800749  | 12.34156604 | 3.67857502 |
| 7.19601255  | 12.33664160 | 3.64559526 |



|             |             |            |
|-------------|-------------|------------|
| 4.22291572  | 7.22554656  | 3.47352448 |
| 9.20777785  | 7.20041201  | 3.40964648 |
| 5.47292217  | 2.23055554  | 2.34193027 |
| 0.48302217  | 2.23055554  | 2.34193027 |
| 6.73540357  | 9.72874639  | 2.00704745 |
| 1.74550357  | 9.72874639  | 2.00704745 |
| 7.98876734  | 3.77819959  | 1.47019894 |
| 2.99886734  | 3.77819959  | 1.47019894 |
| 9.21347812  | 11.29064837 | 1.28800348 |
| 4.22357812  | 11.29064837 | 1.28800348 |
| 5.52626486  | 6.13002817  | 0.45987182 |
| 0.53636486  | 6.13002817  | 0.45987182 |
| 7.45328915  | 1.12937154  | 0.40848067 |
| 2.46338915  | 1.12937154  | 0.40848067 |
| 4.75647854  | 8.73880611  | 0.18583303 |
| -0.23342146 | 8.73880611  | 0.18583303 |
| 4.01084754  | 10.30322941 | 7.25002068 |
| 3.74453527  | 0.34432819  | 7.06542532 |
| 6.34126277  | 11.05079580 | 6.95975493 |
| 3.85033199  | 5.17127061  | 6.98018613 |
| 8.80515823  | 5.10651817  | 6.98961404 |
| -0.39234560 | 7.48621558  | 6.97662614 |
| 4.63624703  | 7.71103152  | 6.93551634 |
| 8.18524624  | 2.53151605  | 6.90906710 |
| 3.15572832  | 2.66048368  | 6.87267185 |
| 1.36189713  | 5.81839917  | 6.80347871 |
| 6.32908613  | 5.80989267  | 6.76893045 |
| 6.98453919  | 8.44951662  | 6.72808780 |
| 5.57376140  | 3.31093633  | 6.73455804 |
| 0.62452769  | 3.25849329  | 6.66759483 |
| 2.09438309  | 8.35294560  | 6.60915661 |
| 0.03951291  | 0.82136134  | 6.62897036 |
| 6.24731227  | 0.90177425  | 6.94608666 |
| 8.17705976  | 11.69143213 | 5.27943562 |
| 3.28484671  | 11.54108048 | 5.18782607 |
| 2.48395874  | 4.17867786  | 5.04420109 |
| 7.46474522  | 4.10530032  | 5.07855566 |
| 3.13420185  | 6.66183185  | 5.03751974 |
| 8.11705522  | 6.68194634  | 5.02836166 |
| 5.64516117  | 12.29979529 | 4.89553037 |
| 8.88600194  | 9.21958836  | 4.96946201 |
| 0.73749003  | 12.38043584 | 4.98792496 |
| 3.85712411  | 9.06117408  | 4.88050473 |
| 3.25050144  | 1.40438602  | 4.82035485 |

|             |             |            |
|-------------|-------------|------------|
| 8.18681994  | 1.40760357  | 4.86370036 |
| 1.32101196  | 9.86788724  | 4.72193418 |
| -0.00547674 | 4.85260603  | 4.73463815 |
| 5.71366038  | 7.30885069  | 4.75267864 |
| 4.99189109  | 4.85314066  | 4.72226020 |
| 0.69337712  | 7.29041830  | 4.70695187 |
| 6.41253044  | 9.74667826  | 4.61159085 |
| 0.77864569  | 2.13929695  | 4.53170577 |
| 5.78199824  | 2.18342006  | 4.53146872 |
| 8.92724451  | 3.16928099  | 3.13275412 |
| 3.93734451  | 3.16928099  | 3.13275412 |
| 9.65447774  | 0.51179240  | 2.92767386 |
| 4.66457774  | 0.51179240  | 2.92767386 |
| 8.19081638  | 10.75315178 | 2.92137328 |
| 3.20091637  | 10.75315178 | 2.92137328 |
| 7.52427827  | 8.16568472  | 2.89047266 |
| 2.53437827  | 8.16568472  | 2.89047266 |
| 6.46140326  | 3.88992115  | 2.81003309 |
| 1.47150326  | 3.88992115  | 2.81003309 |
| 8.23615357  | 5.59719332  | 2.75910422 |
| 3.24625357  | 5.59719332  | 2.75910422 |
| 5.72548353  | 11.29866287 | 2.69921895 |
| 0.73558353  | 11.29866287 | 2.69921895 |
| 5.02271343  | 8.84247544  | 2.64073298 |
| 0.03281343  | 8.84247544  | 2.64073298 |
| 7.16234573  | 1.15467185  | 2.58495906 |
| 2.17244573  | 1.15467185  | 2.58495906 |
| 5.69094282  | 6.28061655  | 2.47308962 |
| 0.70104282  | 6.28061655  | 2.47308962 |
| 4.72644856  | 4.52631212  | 0.98044427 |
| -0.26345145 | 4.52631212  | 0.98044427 |
| 8.98416265  | 2.08401219  | 0.94984236 |
| 3.99426265  | 2.08401219  | 0.94984236 |
| 7.49692293  | 12.16127468 | 0.88189072 |
| 2.50702293  | 12.16127468 | 0.88189072 |
| 8.92881242  | 7.14167817  | 0.77916237 |
| 3.93891242  | 7.14167817  | 0.77916237 |
| 8.23179647  | 9.65808525  | 0.74752367 |
| 3.24189647  | 9.65808525  | 0.74752367 |
| 6.50168782  | 2.71004334  | 0.73384591 |
| 1.51178782  | 2.71004334  | 0.73384591 |
| 5.78449336  | 0.24636792  | 0.66762456 |
| 0.79459336  | 0.24636792  | 0.66762456 |
| 6.40908241  | 7.83185195  | 0.60482946 |

|            |             |            |
|------------|-------------|------------|
| 1.41918241 | 7.83185195  | 0.60482946 |
| 7.18588982 | 5.31081574  | 0.60368013 |
| 2.19598981 | 5.31081574  | 0.60368013 |
| 5.68450729 | 10.28863881 | 0.50651002 |
| 0.69460729 | 10.28863881 | 0.50651002 |

## 2. TS sampling for CO dissociation

# TS for CO dissociation on Fe<sub>2</sub>C(111) without a C<sub>v</sub>

1.000000000000

|             |            |             |
|-------------|------------|-------------|
| 10.94560000 | 0.00000000 | 0.00000000  |
| 2.91646047  | 9.85136206 | 0.00000000  |
| 0.00000004  | 0.00000003 | 22.33820000 |

|    |   |    |
|----|---|----|
| C  | O | Fe |
| 45 | 1 | 80 |

Cart

|             |            |             |
|-------------|------------|-------------|
| 4.57273985  | 3.51389668 | 10.90406726 |
| 7.28158549  | 1.44625942 | 9.68203580  |
| 3.30941314  | 6.47033027 | 9.71393369  |
| 6.01426210  | 8.59001063 | 10.73877577 |
| 10.05194169 | 3.55104871 | 10.88002496 |
| 5.99843242  | 6.20861245 | 11.69178106 |
| 1.81459485  | 3.67142354 | 11.07398325 |
| 12.90226841 | 9.60907519 | 8.64258421  |
| 7.33428039  | 3.57522769 | 11.03649843 |
| 8.66736857  | 6.46711218 | 9.71698169  |
| 11.50934002 | 8.44434067 | 10.88907991 |
| 8.75059834  | 8.55486749 | 11.10804299 |
| 1.79038154  | 1.50839546 | 9.68123608  |
| 7.45017234  | 9.63589613 | 8.61834778  |
| 5.97032609  | 4.69691139 | 8.67531333  |
| 3.28790953  | 8.58296992 | 11.14564498 |
| 11.44778982 | 4.69805875 | 8.64158114  |
| 8.69967527  | 2.83791223 | 7.60522600  |
| 4.68485413  | 7.76517367 | 7.57814330  |
| 3.23627853  | 2.85392170 | 7.60569260  |
| 10.16823829 | 7.74805357 | 7.60604443  |
| 7.43816529  | 5.86362844 | 6.53201566  |
| 5.98788430  | 0.94549656 | 6.52298106  |
| 1.96854243  | 5.87439542 | 6.53687334  |
| 0.51022174  | 0.95057753 | 6.53188749  |
| 6.18124437  | 8.91008091 | 5.47339487  |
| 4.72301388  | 3.98440003 | 5.47339487  |
| 11.65404415 | 8.91008091 | 5.47339487  |

|             |            |             |
|-------------|------------|-------------|
| 10.19581413 | 3.98440003 | 5.47339487  |
| 8.91616154  | 7.05424500 | 4.42384434  |
| 7.45793152  | 2.12856388 | 4.42384434  |
| 3.44336176  | 7.05424500 | 4.42384434  |
| 1.98513138  | 2.12856388 | 4.42384434  |
| 6.16477823  | 5.32385874 | 3.37705779  |
| 4.70654774  | 0.39817780 | 3.37705779  |
| 11.63757801 | 5.32385874 | 3.37705779  |
| 10.17934799 | 0.39817780 | 3.37705779  |
| 8.85213566  | 3.26925707 | 2.18423510  |
| 4.83756590  | 8.19493771 | 2.18423510  |
| 3.37933564  | 3.26925707 | 2.18423510  |
| 10.31036568 | 8.19493771 | 2.18423510  |
| 7.58465672  | 8.10247421 | 1.99986386  |
| 6.12642622  | 3.17679358 | 1.99986386  |
| 13.05745697 | 8.10247421 | 1.99986386  |
| 11.59922600 | 3.17679358 | 1.99986386  |
| 4.56289975  | 2.15194188 | 12.08192717 |
| 10.08365349 | 7.18938920 | 10.87010396 |
| 3.10052119  | 2.28539354 | 10.89586015 |
| 4.69917523  | 7.21924287 | 10.88860115 |
| 8.68354909  | 2.24799348 | 10.83076684 |
| 10.15471208 | 9.67092440 | 10.63210808 |
| 5.96365703  | 4.75802843 | 10.64013609 |
| 11.42992768 | 2.28240435 | 10.84572524 |
| 12.93333537 | 7.21332211 | 10.87285922 |
| 6.02529001  | 2.21954147 | 10.88088424 |
| 7.44483847  | 9.73218394 | 10.49775714 |
| 11.40941783 | 4.82684761 | 10.52219679 |
| 12.86914373 | 9.73183622 | 10.53190014 |
| 11.54598518 | 8.24740533 | 8.87775087  |
| 3.22057895  | 4.80837247 | 10.61083861 |
| 4.60650803  | 9.71198759 | 10.57075249 |
| 8.69418070  | 4.79368285 | 10.60909410 |
| 8.79653572  | 8.24179063 | 8.85077038  |
| 7.32422857  | 3.30644916 | 8.88278654  |
| 1.87237810  | 3.33037788 | 8.87957112  |
| 3.32233178  | 8.24264404 | 8.84033289  |
| 6.07924465  | 8.29943270 | 8.80200216  |
| 4.61887593  | 3.33015857 | 8.89539820  |
| 7.31988023  | 7.20846596 | 10.89283755 |
| 10.07706824 | 3.35285595 | 8.86519890  |
| 7.32480964  | 6.01818912 | 8.43906620  |
| 5.88945821  | 1.10175341 | 8.42763112  |

|             |            |            |
|-------------|------------|------------|
| 0.39897540  | 1.09560022 | 8.44315366 |
| 1.89084698  | 6.01741074 | 8.46164231 |
| 8.63413670  | 1.09775510 | 8.41701143 |
| 4.61476747  | 6.02614596 | 8.40939700 |
| 3.14857946  | 1.11793340 | 8.40643688 |
| 10.06111450 | 6.02580083 | 8.45754824 |
| 7.55431960  | 9.45497928 | 6.71111627 |
| 6.08738219  | 4.52029719 | 6.74210357 |
| 13.02631157 | 9.45152497 | 6.72356219 |
| 11.56505677 | 4.53552714 | 6.73227507 |
| 8.82468409  | 4.52319625 | 6.70712039 |
| 4.81433388  | 9.46103144 | 6.69864709 |
| 3.35762819  | 4.53287869 | 6.70676041 |
| 10.28468232 | 9.44368542 | 6.70783377 |
| 6.05616091  | 7.21082826 | 6.35022747 |
| 4.60165675  | 2.29686215 | 6.37094463 |
| 11.53053817 | 7.21689488 | 6.37172748 |
| 10.06964665 | 2.29381298 | 6.37018566 |
| 8.79437814  | 7.20824976 | 6.34838694 |
| 7.33727353  | 2.28939891 | 6.34478588 |
| 3.31501351  | 7.21400646 | 6.34198902 |
| 1.86134821  | 2.29783041 | 6.34572534 |
| 8.81910992  | 0.78674275 | 4.63805676 |
| 4.80454063  | 5.71242380 | 4.63805676 |
| 3.34631014  | 0.78674275 | 4.63805676 |
| 10.27734089 | 5.71242380 | 4.63805676 |
| 7.55727768  | 5.71838522 | 4.62066126 |
| 6.09904766  | 0.79270440 | 4.62066126 |
| 2.08447790  | 5.71838522 | 4.62066126 |
| 0.62624747  | 0.79270440 | 4.62066126 |
| 8.82021332  | 3.47978425 | 4.20587540 |
| 4.80564356  | 8.40546513 | 4.20587540 |
| 3.34741306  | 3.47978425 | 4.20587540 |
| 10.27844334 | 8.40546513 | 4.20587540 |
| 7.54940796  | 8.42789936 | 4.20249939 |
| 6.09117746  | 3.50221849 | 4.20249939 |
| 13.02220726 | 8.42789936 | 4.20249939 |
| 11.56397724 | 3.50221849 | 4.20249939 |
| 8.93827438  | 6.93054914 | 2.54134583 |
| 7.48004389  | 2.00486803 | 2.54134583 |
| 3.46547413  | 6.93054914 | 2.54134583 |
| 2.00724387  | 2.00486803 | 2.54134583 |
| 6.19786596  | 6.96187782 | 2.44749212 |
| 4.73963594  | 2.03619671 | 2.44749212 |

|             |            |            |
|-------------|------------|------------|
| 11.67066574 | 6.96187782 | 2.44749212 |
| 10.21243572 | 2.03619671 | 2.44749212 |
| 6.23309374  | 9.47346973 | 2.22578788 |
| 4.77486372  | 4.54778910 | 2.22578788 |
| 11.70589352 | 9.47346973 | 2.22578788 |
| 10.24766350 | 4.54778910 | 2.22578788 |
| 8.92396069  | 9.46470928 | 2.21652770 |
| 7.46573067  | 4.53902865 | 2.21652770 |
| 3.45116115  | 9.46470928 | 2.21652770 |
| 1.99293077  | 4.53902865 | 2.21652770 |

# TS for CO dissociation on Fe<sub>2</sub>C(111) with a C<sub>v</sub>

1.000000000000

|             |            |             |
|-------------|------------|-------------|
| 10.94560000 | 0.00000000 | 0.00000000  |
| 2.91646047  | 9.85136206 | 0.00000000  |
| 0.00000004  | 0.00000003 | 22.33820000 |

|    |   |    |
|----|---|----|
| C  | O | Fe |
| 44 | 1 | 80 |

Cart

|             |            |             |
|-------------|------------|-------------|
| 7.30390540  | 3.71084583 | 11.15345096 |
| 11.51915944 | 8.47893203 | 10.88801154 |
| 6.05515167  | 8.40822600 | 10.87694503 |
| 1.84230643  | 3.62917343 | 11.06820409 |
| 8.77800228  | 8.52172255 | 11.07726504 |
| 4.58043448  | 3.52166462 | 10.88520662 |
| 3.29551488  | 8.57862694 | 11.06825898 |
| 10.07417679 | 3.53848166 | 10.88473026 |
| 8.74257555  | 6.40955432 | 9.65347504  |
| 7.27948244  | 1.50009124 | 9.70479365  |
| 3.24863670  | 6.40969173 | 9.68223719  |
| 1.81063820  | 1.47242098 | 9.68918589  |
| 7.44314163  | 9.59350079 | 8.65226972  |
| 5.97637845  | 4.68805798 | 8.63384977  |
| 12.90926091 | 9.61144564 | 8.63467465  |
| 11.45580490 | 4.67280918 | 8.63677018  |
| 8.71167690  | 2.83937405 | 7.60825406  |
| 4.69702263  | 7.75394038 | 7.60050058  |
| 3.24515941  | 2.82591237 | 7.60299757  |
| 10.16906773 | 7.76315508 | 7.59603607  |
| 7.44431077  | 5.86785965 | 6.52630980  |
| 5.98747834  | 0.94204342 | 6.53672864  |
| 1.97513782  | 5.86946138 | 6.53213741  |
| 0.51845798  | 0.94374265 | 6.53154641  |
| 6.18124437  | 8.91008091 | 5.47339487  |

|             |            |             |
|-------------|------------|-------------|
| 4.72301388  | 3.98440003 | 5.47339487  |
| 11.65404415 | 8.91008091 | 5.47339487  |
| 10.19581413 | 3.98440003 | 5.47339487  |
| 8.91616154  | 7.05424500 | 4.42384434  |
| 7.45793152  | 2.12856388 | 4.42384434  |
| 3.44336176  | 7.05424500 | 4.42384434  |
| 1.98513138  | 2.12856388 | 4.42384434  |
| 6.16477823  | 5.32385874 | 3.37705779  |
| 4.70654774  | 0.39817780 | 3.37705779  |
| 11.63757801 | 5.32385874 | 3.37705779  |
| 10.17934799 | 0.39817780 | 3.37705779  |
| 8.85213566  | 3.26925707 | 2.18423510  |
| 4.83756590  | 8.19493771 | 2.18423510  |
| 3.37933564  | 3.26925707 | 2.18423510  |
| 10.31036568 | 8.19493771 | 2.18423510  |
| 7.58465672  | 8.10247421 | 1.99986386  |
| 6.12642622  | 3.17679358 | 1.99986386  |
| 13.05745697 | 8.10247421 | 1.99986386  |
| 11.59922600 | 3.17679358 | 1.99986386  |
| 7.24948518  | 5.24067046 | 11.93280849 |
| 10.14856533 | 7.18904703 | 10.82552525 |
| 5.99763977  | 2.28495129 | 10.87026319 |
| 4.61254604  | 7.19842905 | 10.84350500 |
| 11.45380878 | 2.26490974 | 10.84119058 |
| 8.66505601  | 2.27935952 | 10.84665815 |
| 7.44558125  | 7.09753407 | 10.95460188 |
| 3.18635918  | 2.25532954 | 10.85046327 |
| 12.90190379 | 7.20693580 | 10.83800772 |
| 8.75425039  | 4.82282859 | 10.67611019 |
| 7.41467748  | 9.66659631 | 10.53826072 |
| 3.22296608  | 4.77304063 | 10.61578078 |
| 12.88805717 | 9.74870711 | 10.51963063 |
| 10.14822401 | 9.69460078 | 10.62753851 |
| 5.88227113  | 4.83042433 | 10.51473392 |
| 4.70887297  | 9.68620775 | 10.62226416 |
| 11.44303802 | 4.80996027 | 10.52040851 |
| 8.80164458  | 8.21689940 | 8.87469077  |
| 7.34276678  | 3.31801567 | 8.85981641  |
| 1.86002767  | 6.01538718 | 8.44221743  |
| 0.41178469  | 1.09146343 | 8.44429131  |
| 6.08302210  | 8.23830996 | 8.87254274  |
| 4.62083075  | 3.33031943 | 8.86420313  |
| 11.54372055 | 8.27123513 | 8.86318499  |
| 10.09168799 | 3.33564276 | 8.87349349  |

|             |            |            |
|-------------|------------|------------|
| 7.34124846  | 6.02418177 | 8.43046058 |
| 5.88688095  | 1.08281635 | 8.45706422 |
| 1.87260300  | 3.29665211 | 8.86358922 |
| 3.32481783  | 8.23659302 | 8.85897512 |
| 8.63154408  | 1.10344073 | 8.43048932 |
| 4.60933064  | 6.02172757 | 8.42355902 |
| 3.17123673  | 1.08793030 | 8.43224638 |
| 10.10048474 | 6.02294575 | 8.40939897 |
| 7.55708689  | 9.44617473 | 6.72939219 |
| 6.09663429  | 4.52504736 | 6.72068910 |
| 13.03019066 | 9.45450768 | 6.71760662 |
| 11.57578616 | 4.51983497 | 6.71789854 |
| 8.82967336  | 4.52223734 | 6.70287008 |
| 4.81649467  | 9.44729477 | 6.70800598 |
| 3.35440443  | 4.51846007 | 6.70202435 |
| 10.28680059 | 9.44996687 | 6.70356959 |
| 6.06223661  | 7.21600098 | 6.36441778 |
| 4.60955066  | 2.28866934 | 6.36771144 |
| 11.53659087 | 7.21666964 | 6.36581770 |
| 10.07927486 | 2.29074733 | 6.37024084 |
| 8.79600183  | 7.21364031 | 6.34416714 |
| 7.33962134  | 2.28679198 | 6.34787004 |
| 3.32628251  | 7.21167474 | 6.34380481 |
| 1.87073966  | 2.28483654 | 6.34546424 |
| 8.81910992  | 0.78674275 | 4.63805676 |
| 4.80454063  | 5.71242380 | 4.63805676 |
| 3.34631014  | 0.78674275 | 4.63805676 |
| 10.27734089 | 5.71242380 | 4.63805676 |
| 7.55727768  | 5.71838522 | 4.62066126 |
| 6.09904766  | 0.79270440 | 4.62066126 |
| 2.08447790  | 5.71838522 | 4.62066126 |
| 0.62624747  | 0.79270440 | 4.62066126 |
| 8.82021332  | 3.47978425 | 4.20587540 |
| 4.80564356  | 8.40546513 | 4.20587540 |
| 3.34741306  | 3.47978425 | 4.20587540 |
| 10.27844334 | 8.40546513 | 4.20587540 |
| 7.54940796  | 8.42789936 | 4.20249939 |
| 6.09117746  | 3.50221849 | 4.20249939 |
| 13.02220726 | 8.42789936 | 4.20249939 |
| 11.56397724 | 3.50221849 | 4.20249939 |
| 8.93827438  | 6.93054914 | 2.54134583 |
| 7.48004389  | 2.00486803 | 2.54134583 |
| 3.46547413  | 6.93054914 | 2.54134583 |
| 2.00724387  | 2.00486803 | 2.54134583 |



|             |            |            |
|-------------|------------|------------|
| 6.19786596  | 6.96187782 | 2.44749212 |
| 4.73963594  | 2.03619671 | 2.44749212 |
| 11.67066574 | 6.96187782 | 2.44749212 |
| 10.21243572 | 2.03619671 | 2.44749212 |
| 6.23309374  | 9.47346973 | 2.22578788 |
| 4.77486372  | 4.54778910 | 2.22578788 |
| 11.70589352 | 9.47346973 | 2.22578788 |
| 10.24766350 | 4.54778910 | 2.22578788 |
| 8.92396069  | 9.46470928 | 2.21652770 |
| 7.46573067  | 4.53902865 | 2.21652770 |
| 3.45116115  | 9.46470928 | 2.21652770 |
| 1.99293077  | 4.53902865 | 2.21652770 |

# TS for CO dissociation on Fe<sub>2</sub>C(111) with a C<sub>v</sub>

1.000000000000

|             |            |             |
|-------------|------------|-------------|
| 10.94560000 | 0.00000000 | 0.00000000  |
| 2.91646047  | 9.85136206 | 0.00000000  |
| 0.00000004  | 0.00000003 | 22.33820000 |

| C  | O | Fe |
|----|---|----|
| 44 | 1 | 80 |

Cart

|             |            |             |
|-------------|------------|-------------|
| 7.33256235  | 3.67285722 | 11.07527726 |
| 11.52983131 | 8.46370972 | 10.88127284 |
| 6.04322341  | 8.44656522 | 10.87561914 |
| 1.82958578  | 3.66213136 | 11.06717534 |
| 8.79139211  | 8.55596571 | 11.05652783 |
| 4.60183921  | 3.58253317 | 10.90564285 |
| 3.30193478  | 8.56863193 | 11.06771630 |
| 10.06700302 | 3.55224341 | 10.88103140 |
| 8.74773805  | 6.41260019 | 9.67362392  |
| 7.28227283  | 1.49010571 | 9.70162199  |
| 3.26919118  | 6.42196811 | 9.66632136  |
| 1.81114173  | 1.49008369 | 9.69896613  |
| 7.44465311  | 9.61506332 | 8.64125923  |
| 5.97871076  | 4.67863792 | 8.63695982  |
| 12.91658394 | 9.61325907 | 8.63400533  |
| 11.46689460 | 4.67845724 | 8.63137583  |
| 8.71300731  | 2.83507383 | 7.60207042  |
| 4.70242544  | 7.76279224 | 7.59022537  |
| 3.24637649  | 2.83880559 | 7.60806760  |
| 10.17573626 | 7.75847933 | 7.59370511  |
| 7.44920152  | 5.86957686 | 6.52982492  |
| 5.99256546  | 0.94835427 | 6.53428037  |

|             |            |             |
|-------------|------------|-------------|
| 1.97939738  | 5.86975832 | 6.52931460  |
| 0.52129101  | 0.95010570 | 6.53246776  |
| 6.18124437  | 8.91008091 | 5.47339487  |
| 4.72301388  | 3.98440003 | 5.47339487  |
| 11.65404415 | 8.91008091 | 5.47339487  |
| 10.19581413 | 3.98440003 | 5.47339487  |
| 8.91616154  | 7.05424500 | 4.42384434  |
| 7.45793152  | 2.12856388 | 4.42384434  |
| 3.44336176  | 7.05424500 | 4.42384434  |
| 1.98513138  | 2.12856388 | 4.42384434  |
| 6.16477823  | 5.32385874 | 3.37705779  |
| 4.70654774  | 0.39817780 | 3.37705779  |
| 11.63757801 | 5.32385874 | 3.37705779  |
| 10.17934799 | 0.39817780 | 3.37705779  |
| 8.85213566  | 3.26925707 | 2.18423510  |
| 4.83756590  | 8.19493771 | 2.18423510  |
| 3.37933564  | 3.26925707 | 2.18423510  |
| 10.31036568 | 8.19493771 | 2.18423510  |
| 7.58465672  | 8.10247421 | 1.99986386  |
| 6.12642622  | 3.17679358 | 1.99986386  |
| 13.05745697 | 8.10247421 | 1.99986386  |
| 11.59922600 | 3.17679358 | 1.99986386  |
| 4.59383778  | 2.23698594 | 12.09931442 |
| 10.13485224 | 7.18310496 | 10.83877774 |
| 6.05285832  | 2.30345808 | 10.89984954 |
| 4.64418785  | 7.18712750 | 10.84025270 |
| 11.44031446 | 2.27495174 | 10.84035423 |
| 8.68190836  | 2.26891751 | 10.84260487 |
| 7.44832775  | 7.19847601 | 10.83287350 |
| 3.13874391  | 2.27686975 | 10.90297934 |
| 12.91995415 | 7.20575822 | 10.83124549 |
| 8.71814580  | 4.78753917 | 10.61208069 |
| 7.41413035  | 9.71287251 | 10.52925114 |
| 3.22589321  | 4.79782403 | 10.60004299 |
| 12.89599789 | 9.74482672 | 10.51747077 |
| 10.17657569 | 9.68653749 | 10.59770684 |
| 5.97290909  | 4.85053884 | 10.51579552 |
| 4.68814592  | 9.68780264 | 10.60031096 |
| 11.42944550 | 4.82786656 | 10.51584258 |
| 8.80635649  | 8.23462924 | 8.85841416  |
| 7.34067510  | 3.30260916 | 8.86279991  |
| 1.87254874  | 6.01718569 | 8.43734504  |
| 0.42108946  | 1.09073712 | 8.44616720  |
| 6.08560245  | 8.25788995 | 8.85896180  |

|             |            |            |
|-------------|------------|------------|
| 4.62377945  | 3.31787673 | 8.89221126 |
| 11.55694359 | 8.26174505 | 8.85771817 |
| 10.09887431 | 3.33760964 | 8.85948877 |
| 7.34738303  | 6.01270666 | 8.43939711 |
| 5.89534772  | 1.08662245 | 8.44608122 |
| 1.88157612  | 3.30685122 | 8.88266812 |
| 3.33615701  | 8.24039858 | 8.85281895 |
| 8.63654896  | 1.09882009 | 8.42737386 |
| 4.62224564  | 6.02387659 | 8.40357929 |
| 3.16192440  | 1.09859629 | 8.42440920 |
| 10.10240398 | 6.02160783 | 8.41238489 |
| 7.55991360  | 9.45437050 | 6.71967591 |
| 6.10107467  | 4.52278092 | 6.72025871 |
| 13.03173673 | 9.45890454 | 6.71681080 |
| 11.57982638 | 4.52014309 | 6.71631516 |
| 8.83193157  | 4.52350232 | 6.70335940 |
| 4.81914137  | 9.45468034 | 6.70220085 |
| 3.36354005  | 4.52302663 | 6.70628445 |
| 10.29114151 | 9.45107754 | 6.70351483 |
| 6.06852690  | 7.21717764 | 6.36225832 |
| 4.60614437  | 2.29091000 | 6.36685664 |
| 11.54189992 | 7.21684870 | 6.36348896 |
| 10.07989202 | 2.29160515 | 6.36896292 |
| 8.79971656  | 7.21459043 | 6.34340807 |
| 7.34427952  | 2.28845785 | 6.34431542 |
| 3.32494665  | 7.21709703 | 6.34242856 |
| 1.87392698  | 2.28984476 | 6.34634666 |
| 8.81910992  | 0.78674275 | 4.63805676 |
| 4.80454063  | 5.71242380 | 4.63805676 |
| 3.34631014  | 0.78674275 | 4.63805676 |
| 10.27734089 | 5.71242380 | 4.63805676 |
| 7.55727768  | 5.71838522 | 4.62066126 |
| 6.09904766  | 0.79270440 | 4.62066126 |
| 2.08447790  | 5.71838522 | 4.62066126 |
| 0.62624747  | 0.79270440 | 4.62066126 |
| 8.82021332  | 3.47978425 | 4.20587540 |
| 4.80564356  | 8.40546513 | 4.20587540 |
| 3.34741306  | 3.47978425 | 4.20587540 |
| 10.27844334 | 8.40546513 | 4.20587540 |
| 7.54940796  | 8.42789936 | 4.20249939 |
| 6.09117746  | 3.50221849 | 4.20249939 |
| 13.02220726 | 8.42789936 | 4.20249939 |
| 11.56397724 | 3.50221849 | 4.20249939 |
| 8.93827438  | 6.93054914 | 2.54134583 |

|             |            |            |
|-------------|------------|------------|
| 7.48004389  | 2.00486803 | 2.54134583 |
| 3.46547413  | 6.93054914 | 2.54134583 |
| 2.00724387  | 2.00486803 | 2.54134583 |
| 6.19786596  | 6.96187782 | 2.44749212 |
| 4.73963594  | 2.03619671 | 2.44749212 |
| 11.67066574 | 6.96187782 | 2.44749212 |
| 10.21243572 | 2.03619671 | 2.44749212 |
| 6.23309374  | 9.47346973 | 2.22578788 |
| 4.77486372  | 4.54778910 | 2.22578788 |
| 11.70589352 | 9.47346973 | 2.22578788 |
| 10.24766350 | 4.54778910 | 2.22578788 |
| 8.92396069  | 9.46470928 | 2.21652770 |
| 7.46573067  | 4.53902865 | 2.21652770 |
| 3.45116115  | 9.46470928 | 2.21652770 |
| 1.99293077  | 4.53902865 | 2.21652770 |

# TS for CO dissociation on Fe<sub>5</sub>C<sub>2</sub>(510) with a C<sub>v</sub>

1.000000000000

|             |             |             |
|-------------|-------------|-------------|
| 9.97980000  | 0.00000000  | 0.00000000  |
| -0.76395804 | 12.66177393 | 0.00000000  |
| 0.00000004  | 0.00000004  | 19.64040000 |

| C  | O | Fe |
|----|---|----|
| 36 | 1 | 80 |

Cart

|             |             |            |
|-------------|-------------|------------|
| 4.22894339  | 9.34246877  | 7.53042485 |
| 9.12906483  | 9.31432311  | 7.47472943 |
| 7.23342538  | 4.27054869  | 7.23638707 |
| 2.23500035  | 4.28608505  | 7.22986778 |
| 3.38259569  | 11.95845136 | 7.20059018 |
| 8.37208010  | 11.95284413 | 7.23791789 |
| 4.70523615  | 6.77497085  | 6.33617041 |
| -0.28447956 | 6.77315740  | 6.34826501 |
| 6.68400133  | 1.64159167  | 6.17344242 |
| 1.69345557  | 1.62814543  | 6.19905249 |
| 7.17771161  | 8.25735516  | 5.56733696 |
| 2.19920171  | 8.31983738  | 5.66053024 |
| 4.21146365  | 3.13584923  | 5.30399978 |
| 9.20867402  | 3.14714886  | 5.30283336 |
| -0.33210958 | 10.81234643 | 4.26807742 |
| 4.67288000  | 10.83193113 | 4.27292149 |
| 1.74477879  | 5.71382340  | 4.01855213 |
| 6.72818573  | 5.69065197  | 4.01047710 |
| 2.18380751  | 12.34504378 | 3.63915708 |

|             |             |            |
|-------------|-------------|------------|
| 7.18348370  | 12.34428276 | 3.64572262 |
| 4.24497222  | 7.20709130  | 3.35008470 |
| 9.23800491  | 7.20098379  | 3.34132926 |
| 5.47292232  | 2.23055553  | 2.34193015 |
| 0.48302215  | 2.23055553  | 2.34193015 |
| 6.73540354  | 9.72874641  | 2.00704742 |
| 1.74550355  | 9.72874641  | 2.00704742 |
| 7.98876715  | 3.77819967  | 1.47019899 |
| 2.99886727  | 3.77819967  | 1.47019899 |
| 9.21347809  | 11.29064846 | 1.28800344 |
| 4.22357798  | 11.29064846 | 1.28800344 |
| 5.52626467  | 6.13002825  | 0.45987183 |
| 0.53636485  | 6.13002825  | 0.45987183 |
| 7.45328903  | 1.12937152  | 0.40848067 |
| 2.46338916  | 1.12937152  | 0.40848067 |
| 4.75647831  | 8.73880577  | 0.18583304 |
| -0.23342146 | 8.73880577  | 0.18583304 |
| 5.70954227  | 9.76071192  | 8.24773410 |
| 3.26437348  | 7.78017997  | 7.15943400 |
| 8.22978766  | 7.75670001  | 7.11395487 |
| 2.52319639  | 10.23140302 | 7.08733019 |
| -0.03690638 | 10.92866430 | 6.95141728 |
| 5.74265879  | 2.20417744  | 4.50862175 |
| -0.03142283 | 0.87136633  | 6.66599411 |
| 8.90240009  | 5.15230063  | 6.96391370 |
| 3.90975555  | 5.16186447  | 6.97251602 |
| 8.18484704  | 2.69648017  | 6.91339126 |
| 3.18703923  | 2.70062742  | 6.91515928 |
| 4.97456328  | 11.00384917 | 6.88549703 |
| 5.72913879  | 8.34306529  | 6.88607720 |
| 0.66322793  | 12.42003465 | 4.89815823 |
| 0.69086111  | 8.40934611  | 6.91265988 |
| 1.44442682  | 5.91873363  | 6.74673977 |
| 6.42616085  | 5.88524638  | 6.72759908 |
| 2.48172391  | 0.08514746  | 7.04342653 |
| 0.70849793  | 3.32047062  | 6.69122084 |
| 5.69641805  | 3.31999837  | 6.69331051 |
| 7.49083643  | 0.14088454  | 7.04593572 |
| 8.20204506  | 11.73202075 | 5.21302204 |
| 5.66644447  | 12.43821821 | 4.88302945 |
| 2.52899853  | 4.23203442  | 5.05240824 |
| 3.91154145  | 9.22946253  | 5.05891222 |
| 7.52104376  | 4.21949492  | 5.04779095 |
| 8.87253754  | 9.24445433  | 5.12674186 |

|             |             |            |
|-------------|-------------|------------|
| 3.20363589  | 6.76759832  | 4.94741586 |
| 8.21105421  | 6.74213940  | 4.92507792 |
| 3.22590278  | 11.76279869 | 5.17875690 |
| 7.45825337  | 10.26583759 | 7.27575521 |
| 8.21125297  | 1.48433236  | 4.83849955 |
| 3.20320389  | 1.48576244  | 4.84191768 |
| 1.38854391  | 9.89645921  | 4.80879389 |
| 6.38903159  | 9.89986995  | 4.81649573 |
| 0.03869025  | 4.86382367  | 4.70663550 |
| 5.71821489  | 7.26984929  | 4.70290519 |
| 0.73558782  | 7.31178722  | 4.71945367 |
| 5.01672572  | 4.85278104  | 4.70804061 |
| 0.75583291  | 2.19761487  | 4.51628927 |
| 4.95192135  | 0.88727541  | 6.64515096 |
| 8.92724419  | 3.16928101  | 3.13275409 |
| 3.93734455  | 3.16928101  | 3.13275409 |
| 9.65447807  | 0.51179242  | 2.92767382 |
| 4.66457796  | 0.51179242  | 2.92767382 |
| 8.19081593  | 10.75315189 | 2.92137337 |
| 3.20091629  | 10.75315189 | 2.92137337 |
| 7.52427816  | 8.16568470  | 2.89047265 |
| 2.53437829  | 8.16568470  | 2.89047265 |
| 6.46140337  | 3.88992119  | 2.81003308 |
| 1.47150326  | 3.88992119  | 2.81003308 |
| 8.23615360  | 5.59719324  | 2.75910425 |
| 3.24625349  | 5.59719324  | 2.75910425 |
| 5.72548342  | 11.29866314 | 2.69921899 |
| 0.73558354  | 11.29866314 | 2.69921899 |
| 5.02271366  | 8.84247589  | 2.64073300 |
| 0.03281343  | 8.84247589  | 2.64073300 |
| 7.16234589  | 1.15467191  | 2.58495903 |
| 2.17244577  | 1.15467191  | 2.58495903 |
| 5.69094276  | 6.28061676  | 2.47308970 |
| 0.70104283  | 6.28061676  | 2.47308970 |
| 4.72644854  | 4.52631235  | 0.98044425 |
| -0.26345146 | 4.52631235  | 0.98044425 |
| 8.98416233  | 2.08401227  | 0.94984233 |
| 3.99426270  | 2.08401227  | 0.94984233 |
| 7.49692297  | 12.16127491 | 0.88189071 |
| 2.50702286  | 12.16127491 | 0.88189071 |
| 8.92881203  | 7.14167833  | 0.77916235 |
| 3.93891239  | 7.14167833  | 0.77916235 |
| 8.23179626  | 9.65808487  | 0.74752367 |
| 3.24189639  | 9.65808487  | 0.74752367 |

|            |             |            |
|------------|-------------|------------|
| 6.50168800 | 2.71004343  | 0.73384589 |
| 1.51178777 | 2.71004343  | 0.73384589 |
| 5.78449345 | 0.24636792  | 0.66762453 |
| 0.79459333 | 0.24636792  | 0.66762453 |
| 6.40908241 | 7.83185196  | 0.60482943 |
| 1.41918242 | 7.83185196  | 0.60482943 |
| 7.18588972 | 5.31081581  | 0.60368013 |
| 2.19598985 | 5.31081581  | 0.60368013 |
| 5.68450737 | 10.28863907 | 0.50651002 |
| 0.69460732 | 10.28863907 | 0.50651002 |

# TS for CO dissociation on Fe<sub>5</sub>C<sub>2</sub>(510) with a C<sub>v</sub>

1.000000000000

|             |             |             |
|-------------|-------------|-------------|
| 9.97980000  | 0.00000000  | 0.00000000  |
| -0.76395804 | 12.66177393 | 0.00000000  |
| 0.00000004  | 0.00000004  | 19.64040000 |

| C  | O | Fe |
|----|---|----|
| 36 | 1 | 80 |

Cart

|             |             |            |
|-------------|-------------|------------|
| 4.15668973  | 9.31269523  | 7.48575892 |
| 9.15602651  | 9.32237250  | 7.46783181 |
| 7.20169698  | 4.27349351  | 7.29018045 |
| 2.27395494  | 4.28187903  | 7.21211953 |
| 3.38568094  | 11.92141792 | 7.20857695 |
| 8.38448010  | 11.94065539 | 7.20420419 |
| 4.66938641  | 6.79346275  | 6.30380578 |
| -0.28410251 | 6.76138295  | 6.36890930 |
| 6.68527563  | 1.61304509  | 6.16728693 |
| 1.69145611  | 1.61223999  | 6.18925790 |
| 7.17360271  | 8.29277750  | 5.62792592 |
| 2.18318572  | 8.30228107  | 5.62716483 |
| 4.21567772  | 3.10752381  | 5.28883033 |
| 9.20354819  | 3.14967696  | 5.32206176 |
| -0.32236214 | 10.81646292 | 4.26572851 |
| 4.66969084  | 10.81348426 | 4.26391479 |
| 1.74236112  | 5.69101711  | 4.01819565 |
| 6.72613819  | 5.70277262  | 4.01448962 |
| 2.18898139  | 12.34043550 | 3.63979562 |
| 7.18104366  | 12.34493039 | 3.63858236 |
| 4.24335620  | 7.20477847  | 3.34737253 |
| 9.23803091  | 7.20538785  | 3.36006428 |
| 5.47292232  | 2.23055553  | 2.34193015 |
| 0.48302215  | 2.23055553  | 2.34193015 |

|             |             |            |
|-------------|-------------|------------|
| 6.73540354  | 9.72874641  | 2.00704742 |
| 1.74550355  | 9.72874641  | 2.00704742 |
| 7.98876715  | 3.77819967  | 1.47019899 |
| 2.99886727  | 3.77819967  | 1.47019899 |
| 9.21347809  | 11.29064846 | 1.28800344 |
| 4.22357798  | 11.29064846 | 1.28800344 |
| 5.52626467  | 6.13002825  | 0.45987183 |
| 0.53636485  | 6.13002825  | 0.45987183 |
| 7.45328903  | 1.12937152  | 0.40848067 |
| 2.46338916  | 1.12937152  | 0.40848067 |
| 4.75647831  | 8.73880577  | 0.18583304 |
| -0.23342146 | 8.73880577  | 0.18583304 |
| 5.72774594  | 4.64553756  | 8.07736540 |
| 3.22879178  | 7.76551361  | 7.14364610 |
| 8.23187217  | 7.77339356  | 7.13484769 |
| 2.50878416  | 10.22624004 | 7.08189650 |
| 7.50018588  | 10.24044500 | 7.08558147 |
| 3.21047942  | 1.46955807  | 4.83605671 |
| 3.22966428  | 11.74327252 | 5.18093611 |
| 8.88388073  | 5.14606916  | 6.95592063 |
| 3.98823656  | 5.16056445  | 7.10791275 |
| 8.17465784  | 2.68707995  | 6.92663110 |
| 3.17526408  | 2.67122897  | 6.90076957 |
| 4.98208413  | 10.92166311 | 6.92891463 |
| 5.67794726  | 8.41512021  | 6.89600487 |
| -0.00823196 | 10.92958216 | 6.91839362 |
| 0.69090685  | 8.39928920  | 6.89676413 |
| 1.44756978  | 5.89541049  | 6.75412810 |
| 6.42409778  | 5.97046640  | 6.76177023 |
| 5.74583054  | 2.18303062  | 4.50074932 |
| 0.71328597  | 3.32305618  | 6.69823832 |
| 5.67352766  | 3.22889028  | 6.69205167 |
| 4.95500894  | 0.84152372  | 6.64273303 |
| 0.67161373  | 12.42428218 | 4.89540143 |
| 7.48423051  | 0.08745822  | 7.04267450 |
| 2.55257767  | 4.23380667  | 5.07316552 |
| 3.89747125  | 9.21838926  | 5.06461576 |
| 7.49590986  | 4.22075170  | 5.05534952 |
| 8.88739466  | 9.21766100  | 5.06388903 |
| 3.20596913  | 6.74907630  | 4.93994543 |
| 8.19768492  | 6.74511910  | 4.93842958 |
| 8.22210136  | 11.75683906 | 5.18054396 |
| 2.49262653  | 0.07933933  | 7.04561184 |
| -0.04122890 | 0.87851990  | 6.66174659 |



|             |             |            |
|-------------|-------------|------------|
| 0.75321199  | 2.20254091  | 4.51757993 |
| 1.39219299  | 9.88861823  | 4.79734900 |
| 6.38566958  | 9.88802898  | 4.80348056 |
| 0.03568681  | 4.85471762  | 4.70889096 |
| 5.71708412  | 7.28152324  | 4.72036427 |
| 0.73000095  | 7.28367580  | 4.72513937 |
| 5.01590900  | 4.85669593  | 4.71797183 |
| 5.66813990  | 12.41867671 | 4.89245627 |
| 8.20615218  | 1.48977777  | 4.84466776 |
| 8.92724419  | 3.16928101  | 3.13275409 |
| 3.93734455  | 3.16928101  | 3.13275409 |
| 9.65447807  | 0.51179242  | 2.92767382 |
| 4.66457796  | 0.51179242  | 2.92767382 |
| 8.19081593  | 10.75315189 | 2.92137337 |
| 3.20091629  | 10.75315189 | 2.92137337 |
| 7.52427816  | 8.16568470  | 2.89047265 |
| 2.53437829  | 8.16568470  | 2.89047265 |
| 6.46140337  | 3.88992119  | 2.81003308 |
| 1.47150326  | 3.88992119  | 2.81003308 |
| 8.23615360  | 5.59719324  | 2.75910425 |
| 3.24625349  | 5.59719324  | 2.75910425 |
| 5.72548342  | 11.29866314 | 2.69921899 |
| 0.73558354  | 11.29866314 | 2.69921899 |
| 5.02271366  | 8.84247589  | 2.64073300 |
| 0.03281343  | 8.84247589  | 2.64073300 |
| 7.16234589  | 1.15467191  | 2.58495903 |
| 2.17244577  | 1.15467191  | 2.58495903 |
| 5.69094276  | 6.28061676  | 2.47308970 |
| 0.70104283  | 6.28061676  | 2.47308970 |
| 4.72644854  | 4.52631235  | 0.98044425 |
| -0.26345146 | 4.52631235  | 0.98044425 |
| 8.98416233  | 2.08401227  | 0.94984233 |
| 3.99426270  | 2.08401227  | 0.94984233 |
| 7.49692297  | 12.16127491 | 0.88189071 |
| 2.50702286  | 12.16127491 | 0.88189071 |
| 8.92881203  | 7.14167833  | 0.77916235 |
| 3.93891239  | 7.14167833  | 0.77916235 |
| 8.23179626  | 9.65808487  | 0.74752367 |
| 3.24189639  | 9.65808487  | 0.74752367 |
| 6.50168800  | 2.71004343  | 0.73384589 |
| 1.51178777  | 2.71004343  | 0.73384589 |
| 5.78449345  | 0.24636792  | 0.66762453 |
| 0.79459333  | 0.24636792  | 0.66762453 |
| 6.40908241  | 7.83185196  | 0.60482943 |

|            |             |            |
|------------|-------------|------------|
| 1.41918242 | 7.83185196  | 0.60482943 |
| 7.18588972 | 5.31081581  | 0.60368013 |
| 2.19598985 | 5.31081581  | 0.60368013 |
| 5.68450737 | 10.28863907 | 0.50651002 |
| 0.69460732 | 10.28863907 | 0.50651002 |

# TS for CO dissociation on Fe<sub>5</sub>C<sub>2</sub>(510) without a C<sub>v</sub>

1.000000000000

|             |             |             |
|-------------|-------------|-------------|
| 9.97980000  | 0.00000000  | 0.00000000  |
| -0.76395804 | 12.66177393 | 0.00000000  |
| 0.00000004  | 0.00000004  | 19.64040000 |

| C  | O | Fe |
|----|---|----|
| 37 | 1 | 80 |

Cart

|             |             |            |
|-------------|-------------|------------|
| 8.53740553  | 12.05605193 | 7.41394617 |
| 4.14963676  | 9.28354586  | 7.53845259 |
| 9.25653596  | 9.32134903  | 7.58823792 |
| 7.23662990  | 4.28711670  | 7.23551708 |
| 2.25568104  | 4.27482370  | 7.23785665 |
| 3.36378038  | 11.95320462 | 7.25773045 |
| 6.49567552  | 11.22654303 | 6.16481893 |
| 4.71080559  | 6.77280276  | 6.35255876 |
| -0.28344302 | 6.78169350  | 6.33690013 |
| 6.70434860  | 1.63389092  | 6.21482960 |
| 1.71664878  | 1.65407348  | 6.16426257 |
| 7.18548782  | 8.24637117  | 5.64082395 |
| 2.19098894  | 8.25357531  | 5.59488485 |
| 4.22697920  | 3.13615759  | 5.30608665 |
| 9.21146580  | 3.13529947  | 5.30506231 |
| -0.32215342 | 10.81667368 | 4.27472758 |
| 4.63557142  | 10.75666615 | 4.20497737 |
| 1.73919146  | 5.69228070  | 4.01363861 |
| 6.73240037  | 5.69699063  | 4.01456037 |
| 2.19566492  | 12.34210410 | 3.64591290 |
| 7.18836725  | 12.36422669 | 3.60720805 |
| 4.24770379  | 7.20320773  | 3.34619116 |
| 9.23619403  | 7.20494511  | 3.34733001 |
| 5.47292232  | 2.23055553  | 2.34193015 |
| 0.48302215  | 2.23055553  | 2.34193015 |
| 6.73540354  | 9.72874641  | 2.00704742 |
| 1.74550355  | 9.72874641  | 2.00704742 |
| 7.98876715  | 3.77819967  | 1.47019899 |
| 2.99886727  | 3.77819967  | 1.47019899 |

|             |             |            |
|-------------|-------------|------------|
| 9.21347809  | 11.29064846 | 1.28800344 |
| 4.22357798  | 11.29064846 | 1.28800344 |
| 5.52626467  | 6.13002825  | 0.45987183 |
| 0.53636485  | 6.13002825  | 0.45987183 |
| 7.45328903  | 1.12937152  | 0.40848067 |
| 2.46338916  | 1.12937152  | 0.40848067 |
| 4.75647831  | 8.73880577  | 0.18583304 |
| -0.23342146 | 8.73880577  | 0.18583304 |
| 0.78673389  | 9.74555961  | 8.27771564 |
| 3.25011307  | 7.73968933  | 7.13521081 |
| 8.25324038  | 7.79672506  | 7.15782070 |
| 2.47059307  | 10.24297631 | 7.28115373 |
| 7.64017826  | 10.30981681 | 7.34136252 |
| 0.66901510  | 12.42221342 | 4.88453374 |
| 7.58174262  | 0.17061754  | 7.11299787 |
| 8.90834226  | 5.16442693  | 6.96814971 |
| 3.92274286  | 5.14676958  | 6.96175134 |
| 8.19742802  | 2.71036111  | 6.92389975 |
| 3.20865779  | 2.69620728  | 6.91266696 |
| 4.86585787  | 10.90087131 | 7.04036162 |
| 5.69505306  | 8.38324593  | 6.92606533 |
| 0.03252937  | 11.01442571 | 6.93914036 |
| 0.74818320  | 8.33364092  | 6.90793021 |
| 1.44140469  | 5.88756271  | 6.72602907 |
| 6.44168950  | 5.91388652  | 6.74552915 |
| 0.71932169  | 3.33150573  | 6.69478889 |
| 0.76295482  | 2.20387223  | 4.50404151 |
| 5.71159509  | 3.31829743  | 6.69708575 |
| 4.97332664  | 0.87070181  | 6.67019810 |
| 8.19468131  | 11.73963861 | 5.21393451 |
| 3.21567369  | 11.71000949 | 5.22103385 |
| 2.53552877  | 4.21466888  | 5.04696140 |
| 3.87408649  | 9.22921126  | 5.12671653 |
| 7.52533664  | 4.22234238  | 5.05583324 |
| 8.89103856  | 9.22784097  | 5.09537264 |
| 3.21748183  | 6.73844875  | 4.92866321 |
| 8.20750510  | 6.75013970  | 4.94326842 |
| -0.00319173 | 0.91548393  | 6.64800613 |
| 5.64966753  | 12.37647241 | 4.89782200 |
| 8.20582236  | 1.47799159  | 4.85299090 |
| 3.23139968  | 1.46988545  | 4.83768302 |
| 1.38292449  | 9.88632847  | 4.82111333 |
| 6.37150264  | 9.83697597  | 4.83997216 |
| 0.03433482  | 4.84811835  | 4.70430718 |

|             |             |            |
|-------------|-------------|------------|
| 5.72179789  | 7.27694708  | 4.72039818 |
| 0.73070824  | 7.27477120  | 4.70808940 |
| 5.03142484  | 4.84883095  | 4.70723430 |
| 2.50680471  | 0.14545589  | 7.04433813 |
| 5.75820124  | 2.19662536  | 4.52315947 |
| 8.92724419  | 3.16928101  | 3.13275409 |
| 3.93734455  | 3.16928101  | 3.13275409 |
| 9.65447807  | 0.51179242  | 2.92767382 |
| 4.66457796  | 0.51179242  | 2.92767382 |
| 8.19081593  | 10.75315189 | 2.92137337 |
| 3.20091629  | 10.75315189 | 2.92137337 |
| 7.52427816  | 8.16568470  | 2.89047265 |
| 2.53437829  | 8.16568470  | 2.89047265 |
| 6.46140337  | 3.88992119  | 2.81003308 |
| 1.47150326  | 3.88992119  | 2.81003308 |
| 8.23615360  | 5.59719324  | 2.75910425 |
| 3.24625349  | 5.59719324  | 2.75910425 |
| 5.72548342  | 11.29866314 | 2.69921899 |
| 0.73558354  | 11.29866314 | 2.69921899 |
| 5.02271366  | 8.84247589  | 2.64073300 |
| 0.03281343  | 8.84247589  | 2.64073300 |
| 7.16234589  | 1.15467191  | 2.58495903 |
| 2.17244577  | 1.15467191  | 2.58495903 |
| 5.69094276  | 6.28061676  | 2.47308970 |
| 0.70104283  | 6.28061676  | 2.47308970 |
| 4.72644854  | 4.52631235  | 0.98044425 |
| -0.26345146 | 4.52631235  | 0.98044425 |
| 8.98416233  | 2.08401227  | 0.94984233 |
| 3.99426270  | 2.08401227  | 0.94984233 |
| 7.49692297  | 12.16127491 | 0.88189071 |
| 2.50702286  | 12.16127491 | 0.88189071 |
| 8.92881203  | 7.14167833  | 0.77916235 |
| 3.93891239  | 7.14167833  | 0.77916235 |
| 8.23179626  | 9.65808487  | 0.74752367 |
| 3.24189639  | 9.65808487  | 0.74752367 |
| 6.50168800  | 2.71004343  | 0.73384589 |
| 1.51178777  | 2.71004343  | 0.73384589 |
| 5.78449345  | 0.24636792  | 0.66762453 |
| 0.79459333  | 0.24636792  | 0.66762453 |
| 6.40908241  | 7.83185196  | 0.60482943 |
| 1.41918242  | 7.83185196  | 0.60482943 |
| 7.18588972  | 5.31081581  | 0.60368013 |
| 2.19598985  | 5.31081581  | 0.60368013 |
| 5.68450737  | 10.28863907 | 0.50651002 |

0.69460732      10.28863907      0.50651002

# TS for CO dissociation on Fe<sub>5</sub>C<sub>2</sub>(021) without a C<sub>v</sub>

1.000000000000

|             |            |             |
|-------------|------------|-------------|
| 14.90600000 | 0.00000000 | 0.00000000  |
| 0.42323971  | 8.40334839 | 0.00000000  |
| 0.00000004  | 0.00000004 | 23.05139900 |

|    |   |    |
|----|---|----|
| C  | O | Fe |
| 37 | 1 | 80 |

Cart

|             |            |            |
|-------------|------------|------------|
| 9.60627360  | 5.27497748 | 7.53396297 |
| 2.74437388  | 2.03559761 | 7.68094536 |
| 10.18904981 | 1.91704687 | 7.61835986 |
| 14.77382592 | 5.55356884 | 5.88704617 |
| 2.20212875  | 5.35425901 | 7.50036032 |
| 5.20956062  | 8.33446973 | 7.45108387 |
| 12.75340221 | 8.22065249 | 7.41967755 |
| 6.56126914  | 2.56125457 | 6.95486934 |
| 13.98235130 | 2.46261514 | 6.82427644 |
| 8.36524960  | 0.14786392 | 6.22857508 |
| 1.02359293  | 0.23837863 | 6.24750727 |
| 7.22423950  | 5.56072736 | 6.05081204 |
| 11.15853333 | 6.05776815 | 4.68306465 |
| 9.25671866  | 3.26375364 | 5.43805503 |
| 1.79308462  | 3.29603039 | 5.43950443 |
| 3.71299392  | 6.07006750 | 4.68175344 |
| 13.66673046 | 5.08097054 | 8.28207637 |
| 5.60633565  | 3.77425845 | 4.10090610 |
| 13.05639917 | 3.75303228 | 4.10358442 |
| 4.13073833  | 0.74735852 | 3.95331516 |
| 11.58099601 | 0.73944829 | 3.95404889 |
| 6.45910597  | 6.85157728 | 3.36946511 |
| 13.91210556 | 6.85157728 | 3.36946511 |
| 7.93326235  | 1.23396885 | 2.61950350 |
| 0.48026219  | 1.23396885 | 2.61950350 |
| 2.91558671  | 7.36299515 | 2.03468370 |
| 10.36858654 | 7.36299515 | 2.03468370 |
| 8.76163578  | 4.32674265 | 1.79040837 |
| 1.30863547  | 4.32674265 | 1.79040837 |
| 3.18085384  | 1.97663546 | 1.14063549 |
| 10.63385391 | 1.97663546 | 1.14063549 |
| 4.93311071  | 4.62204313 | 0.60898984 |
| 12.38611031 | 4.62204313 | 0.60898984 |

|             |            |            |
|-------------|------------|------------|
| 7.97210503  | 7.58761215 | 0.54751450 |
| 0.51910490  | 7.58761215 | 0.54751450 |
| 6.98546123  | 2.51763773 | 0.40115634 |
| 14.43846130 | 2.51763773 | 0.40115634 |
| 10.21822342 | 6.74780589 | 8.28237671 |
| 11.22723932 | 6.03075622 | 6.64587704 |
| 13.67285896 | 6.55979504 | 7.24146873 |
| 4.62994083  | 1.86911995 | 7.44992436 |
| 12.05049738 | 1.72028583 | 7.39434425 |
| 6.06049840  | 6.60776561 | 7.27363664 |
| 14.98791027 | 7.26003196 | 5.00069397 |
| 2.81607762  | 0.19805766 | 7.26828190 |
| 10.20148819 | 0.03699565 | 7.31862389 |
| 8.55001986  | 6.86795593 | 7.21919296 |
| 1.29245950  | 6.97439408 | 7.18511726 |
| 2.90490992  | 3.72970300 | 7.00481874 |
| 10.37265262 | 3.65624344 | 7.02766441 |
| 5.39463118  | 4.15807910 | 6.82686655 |
| 12.87469378 | 4.04398009 | 7.00812975 |
| 6.55425035  | 0.56947996 | 6.82206004 |
| 14.06824283 | 0.51791435 | 6.77059275 |
| 8.48860824  | 2.03107271 | 6.79838838 |
| 1.04815002  | 2.09317325 | 6.80609311 |
| 3.74660926  | 6.09186147 | 6.63718161 |
| 0.38876947  | 4.61033343 | 7.51579560 |
| 5.05583508  | 8.07980582 | 5.52650389 |
| 7.83544745  | 4.41462153 | 7.49766766 |
| 9.15617204  | 5.26765732 | 5.39939574 |
| 14.73299831 | 3.66926667 | 5.25679191 |
| 3.00635981  | 1.73795464 | 5.24725080 |
| 10.45951371 | 1.70674105 | 5.27740981 |
| 7.30881685  | 3.66559907 | 5.20725378 |
| 0.49234227  | 1.23819836 | 4.55698103 |
| 5.47408159  | 2.08927897 | 5.12203499 |
| 12.90602058 | 2.07075351 | 5.10783362 |
| 7.52120153  | 7.25325334 | 5.03164082 |
| 12.49688883 | 8.05580213 | 5.52639094 |
| 1.72476011  | 5.27555508 | 5.37980063 |
| 9.98828272  | 7.65790753 | 4.90006194 |
| 5.69791576  | 5.65843964 | 4.80855537 |
| 13.14398582 | 5.63717251 | 4.82116814 |
| 3.81134721  | 4.11323414 | 4.74452431 |
| 11.25571526 | 4.09278730 | 4.77394757 |
| 7.94524070  | 1.22619084 | 4.55654892 |

|             |            |            |
|-------------|------------|------------|
| 2.55361031  | 7.68735284 | 4.89201376 |
| 9.24510097  | 3.28775048 | 3.49441624 |
| 1.79210067  | 3.28775048 | 3.49441624 |
| 5.93108559  | 0.40572783 | 3.30346417 |
| 13.38408565 | 0.40572783 | 3.30346417 |
| 4.47159576  | 7.26234245 | 3.24290895 |
| 11.92459583 | 7.26234245 | 3.24290895 |
| 7.61672831  | 5.24388313 | 3.15383196 |
| 15.06972790 | 5.24388313 | 3.15383196 |
| 2.63376808  | 5.66717625 | 3.03582549 |
| 10.08676815 | 5.66717625 | 3.03582549 |
| 4.26076746  | 2.43179297 | 2.93866873 |
| 11.71376801 | 2.43179297 | 2.93866873 |
| 9.89125442  | 0.84577286 | 2.82996941 |
| 2.43825460  | 0.84577286 | 2.82996941 |
| 6.72640657  | 2.78669548 | 2.80400848 |
| 14.17940712 | 2.78669548 | 2.80400848 |
| 8.45943737  | 7.64924812 | 2.68994594 |
| 1.00643730  | 7.64924812 | 2.68994594 |
| 5.09631491  | 4.84222126 | 2.52809286 |
| 12.54931545 | 4.84222126 | 2.52809286 |
| 6.42297029  | 6.83616877 | 1.40942586 |
| 13.87596989 | 6.83616877 | 1.40942586 |
| 8.68566036  | 2.45029783 | 1.24810267 |
| 1.23265994  | 2.45029783 | 1.24810267 |
| 3.15018106  | 3.96655679 | 1.23820484 |
| 10.60318089 | 3.96655679 | 1.23820484 |
| 4.33920240  | 0.37170255 | 1.20792723 |
| 11.79220295 | 0.37170255 | 1.20792723 |
| 6.82007313  | 0.80580682 | 1.04853928 |
| 14.27307320 | 0.80580682 | 1.04853928 |
| 8.95301247  | 6.01934624 | 0.88174963 |
| 1.50001240  | 6.01934624 | 0.88174963 |
| 6.94090939  | 4.36216164 | 0.80574113 |
| 14.39390945 | 4.36216164 | 0.80574113 |
| 4.05270052  | 6.32821703 | 0.79609853 |
| 11.50570011 | 6.32821703 | 0.79609853 |
| 5.10706043  | 2.69428372 | 0.63864446 |
| 12.56006050 | 2.69428372 | 0.63864446 |
| 9.31387520  | 0.04532212 | 0.55626547 |
| 1.86087537  | 0.04532212 | 0.55626547 |

# TS for CO dissociation on Fe<sub>5</sub>C<sub>2</sub>(021) with a C<sub>v</sub>

1.000000000000

|             |            |             |
|-------------|------------|-------------|
| 14.90600000 | 0.00000000 | 0.00000000  |
| 0.42323971  | 8.40334839 | 0.00000000  |
| 0.00000004  | 0.00000004 | 23.05139900 |

|    |   |    |
|----|---|----|
| C  | O | Fe |
| 36 | 1 | 80 |

Cart

|             |            |            |
|-------------|------------|------------|
| 2.15241619  | 5.29087621 | 7.54473519 |
| 2.73222517  | 1.95934037 | 7.62885600 |
| 10.18961034 | 2.01008234 | 7.66530477 |
| 9.62677056  | 5.32517772 | 7.50546433 |
| 5.27505042  | 8.30871482 | 7.44908065 |
| 12.64633864 | 8.29849934 | 7.44340526 |
| 6.56202345  | 2.54532089 | 6.92448334 |
| 14.00154497 | 2.54328745 | 6.94351127 |
| 8.42848109  | 0.18626884 | 6.26940549 |
| 0.92244489  | 0.16279741 | 6.23397783 |
| 7.24595158  | 5.54462256 | 6.01850306 |
| 14.67991775 | 5.55724825 | 6.04009036 |
| 9.25974475  | 3.28007078 | 5.43321140 |
| 1.80025488  | 3.27237418 | 5.43735169 |
| 3.70952078  | 6.06539778 | 4.68161776 |
| 11.16041970 | 6.07247704 | 4.69085351 |
| 5.59691125  | 3.76217054 | 4.10251256 |
| 13.05091868 | 3.76730638 | 4.10292848 |
| 4.12741978  | 0.74342964 | 3.96026698 |
| 11.58574558 | 0.74505288 | 3.94924362 |
| 6.45910597  | 6.85157728 | 3.36946511 |
| 13.91210556 | 6.85157728 | 3.36946511 |
| 7.93326235  | 1.23396885 | 2.61950350 |
| 0.48026219  | 1.23396885 | 2.61950350 |
| 2.91558671  | 7.36299515 | 2.03468370 |
| 10.36858654 | 7.36299515 | 2.03468370 |
| 8.76163578  | 4.32674265 | 1.79040837 |
| 1.30863547  | 4.32674265 | 1.79040837 |
| 3.18085384  | 1.97663546 | 1.14063549 |
| 10.63385391 | 1.97663546 | 1.14063549 |
| 4.93311071  | 4.62204313 | 0.60898984 |
| 12.38611031 | 4.62204313 | 0.60898984 |
| 7.97210503  | 7.58761215 | 0.54751450 |
| 0.51910490  | 7.58761215 | 0.54751450 |
| 6.98546123  | 2.51763773 | 0.40115634 |
| 14.43846130 | 2.51763773 | 0.40115634 |
| 2.79235766  | 6.75700655 | 8.28448108 |



|             |            |            |
|-------------|------------|------------|
| 7.85702378  | 4.45382194 | 7.49939191 |
| 0.38110435  | 4.42702188 | 7.50193560 |
| 4.61201004  | 1.80276267 | 7.40801131 |
| 12.06891006 | 1.82995513 | 7.43474173 |
| 6.13490901  | 6.60073262 | 7.25561785 |
| 13.51902442 | 6.58736239 | 7.26567476 |
| 2.77625414  | 0.07625821 | 7.34254259 |
| 10.23066062 | 0.16376248 | 7.25943564 |
| 8.65480850  | 6.89409516 | 7.17570193 |
| 1.11464230  | 6.88349112 | 7.21812891 |
| 2.89961421  | 3.68424637 | 7.01816760 |
| 10.36329016 | 3.71111179 | 7.00114246 |
| 5.38794909  | 4.12701545 | 6.83128466 |
| 12.83764615 | 4.13849609 | 6.82789725 |
| 6.59206070  | 0.55988375 | 6.80052788 |
| 14.00452619 | 0.55025670 | 6.81634373 |
| 8.50339818  | 2.06671536 | 6.80038434 |
| 1.02939784  | 2.03777728 | 6.79847167 |
| 3.75991447  | 6.03893148 | 6.64574914 |
| 11.17609941 | 6.07906788 | 6.64619596 |
| 5.04268052  | 8.06607978 | 5.54098168 |
| 12.49473676 | 8.06520194 | 5.52576801 |
| 9.14799683  | 5.26546796 | 5.36974519 |
| 1.69216796  | 5.27724829 | 5.38346148 |
| 3.00686329  | 1.71961418 | 5.27823140 |
| 10.46345846 | 1.72736011 | 5.24837873 |
| 7.29822827  | 3.66149899 | 5.21301388 |
| 14.75453170 | 3.66445062 | 5.21086253 |
| 5.46699903  | 2.07503709 | 5.11482923 |
| 12.92254273 | 2.08026827 | 5.12019576 |
| 7.52661633  | 7.24499943 | 5.01752741 |
| 14.97078848 | 7.25112272 | 5.02682727 |
| 2.53716446  | 7.67042733 | 4.90863887 |
| 9.99012611  | 7.67332287 | 4.90153787 |
| 5.68882177  | 5.65138974 | 4.81377776 |
| 13.14489817 | 5.65310240 | 4.80964019 |
| 3.79630238  | 4.10363400 | 4.75618676 |
| 11.25533346 | 4.11452838 | 4.74664142 |
| 7.94397403  | 1.22468475 | 4.55970205 |
| 0.49011810  | 1.22639848 | 4.55585235 |
| 9.24510097  | 3.28775048 | 3.49441624 |
| 1.79210067  | 3.28775048 | 3.49441624 |
| 5.93108559  | 0.40572783 | 3.30346417 |
| 13.38408565 | 0.40572783 | 3.30346417 |

|             |            |            |
|-------------|------------|------------|
| 4.47159576  | 7.26234245 | 3.24290895 |
| 11.92459583 | 7.26234245 | 3.24290895 |
| 7.61672831  | 5.24388313 | 3.15383196 |
| 15.06972790 | 5.24388313 | 3.15383196 |
| 2.63376808  | 5.66717625 | 3.03582549 |
| 10.08676815 | 5.66717625 | 3.03582549 |
| 4.26076746  | 2.43179297 | 2.93866873 |
| 11.71376801 | 2.43179297 | 2.93866873 |
| 9.89125442  | 0.84577286 | 2.82996941 |
| 2.43825460  | 0.84577286 | 2.82996941 |
| 6.72640657  | 2.78669548 | 2.80400848 |
| 14.17940712 | 2.78669548 | 2.80400848 |
| 8.45943737  | 7.64924812 | 2.68994594 |
| 1.00643730  | 7.64924812 | 2.68994594 |
| 5.09631491  | 4.84222126 | 2.52809286 |
| 12.54931545 | 4.84222126 | 2.52809286 |
| 6.42297029  | 6.83616877 | 1.40942586 |
| 13.87596989 | 6.83616877 | 1.40942586 |
| 8.68566036  | 2.45029783 | 1.24810267 |
| 1.23265994  | 2.45029783 | 1.24810267 |
| 3.15018106  | 3.96655679 | 1.23820484 |
| 10.60318089 | 3.96655679 | 1.23820484 |
| 4.33920240  | 0.37170255 | 1.20792723 |
| 11.79220295 | 0.37170255 | 1.20792723 |
| 6.82007313  | 0.80580682 | 1.04853928 |
| 14.27307320 | 0.80580682 | 1.04853928 |
| 8.95301247  | 6.01934624 | 0.88174963 |
| 1.50001240  | 6.01934624 | 0.88174963 |
| 6.94090939  | 4.36216164 | 0.80574113 |
| 14.39390945 | 4.36216164 | 0.80574113 |
| 4.05270052  | 6.32821703 | 0.79609853 |
| 11.50570011 | 6.32821703 | 0.79609853 |
| 5.10706043  | 2.69428372 | 0.63864446 |
| 12.56006050 | 2.69428372 | 0.63864446 |
| 9.31387520  | 0.04532212 | 0.55626547 |
| 1.86087537  | 0.04532212 | 0.55626547 |

# TS for CO dissociation on Fe<sub>5</sub>C<sub>2</sub>(021) with a C<sub>v</sub>

1.000000000000

|             |            |             |
|-------------|------------|-------------|
| 14.90600000 | 0.00000000 | 0.00000000  |
| 0.42323971  | 8.40334839 | 0.00000000  |
| 0.00000004  | 0.00000004 | 23.05139900 |
| C           | O          | Fe          |

|      | 36          | 1          | 80         |
|------|-------------|------------|------------|
| Cart |             |            |            |
|      | 3.69364612  | 6.05393068 | 4.69179117 |
|      | 2.74552901  | 1.97487704 | 7.63382001 |
|      | 10.20532542 | 2.01776877 | 7.66825355 |
|      | 9.61815645  | 5.33742917 | 7.50821107 |
|      | 4.90456639  | 0.01658196 | 7.38910808 |
|      | 12.65990573 | 8.30122829 | 7.44397491 |
|      | 6.58805617  | 2.57464317 | 6.93814147 |
|      | 14.01169548 | 2.54194856 | 6.95222466 |
|      | 8.44238074  | 0.19022975 | 6.27074959 |
|      | 0.95512264  | 0.15140859 | 6.29988850 |
|      | 7.21423905  | 5.57789453 | 6.06594689 |
|      | 13.03874022 | 3.75681470 | 4.09903773 |
|      | 9.27879699  | 3.29367991 | 5.43131508 |
|      | 1.78467277  | 3.24275421 | 5.42606073 |
|      | 2.09491244  | 5.27073295 | 7.47747657 |
|      | 11.15651168 | 6.07633148 | 4.68717287 |
|      | 5.60849371  | 3.77977092 | 4.10410867 |
|      | 14.67279121 | 5.54201827 | 6.02747143 |
|      | 4.13096370  | 0.74617308 | 3.94679163 |
|      | 11.58579395 | 0.74528064 | 3.94207573 |
|      | 6.45910597  | 6.85157728 | 3.36946511 |
|      | 13.91210556 | 6.85157728 | 3.36946511 |
|      | 7.93326235  | 1.23396885 | 2.61950350 |
|      | 0.48026219  | 1.23396885 | 2.61950350 |
|      | 2.91558671  | 7.36299515 | 2.03468370 |
|      | 10.36858654 | 7.36299515 | 2.03468370 |
|      | 8.76163578  | 4.32674265 | 1.79040837 |
|      | 1.30863547  | 4.32674265 | 1.79040837 |
|      | 3.18085384  | 1.97663546 | 1.14063549 |
|      | 10.63385391 | 1.97663546 | 1.14063549 |
|      | 4.93311071  | 4.62204313 | 0.60898984 |
|      | 12.38611031 | 4.62204313 | 0.60898984 |
|      | 7.97210503  | 7.58761215 | 0.54751450 |
|      | 0.51910490  | 7.58761215 | 0.54751450 |
|      | 6.98546123  | 2.51763773 | 0.40115634 |
|      | 14.43846130 | 2.51763773 | 0.40115634 |
|      | 4.32782936  | 7.05618260 | 8.18839797 |
|      | 7.85558014  | 4.45059779 | 7.50081494 |
|      | 0.34569097  | 4.40036919 | 7.49387943 |
|      | 4.63190794  | 1.87774481 | 7.39960793 |
|      | 12.08120127 | 1.83102655 | 7.44181527 |
|      | 6.05907017  | 6.60380467 | 7.28625751 |

|             |            |            |
|-------------|------------|------------|
| 13.52011491 | 6.58250499 | 7.27025984 |
| 2.78748880  | 0.10680269 | 7.29661777 |
| 10.24110375 | 0.16785987 | 7.25875349 |
| 8.62598470  | 6.89577568 | 7.17649989 |
| 1.12018916  | 6.84883764 | 7.16265171 |
| 2.88757014  | 3.67968500 | 6.98159636 |
| 10.36772179 | 3.72416154 | 7.01230954 |
| 5.39409623  | 4.14128997 | 6.80734238 |
| 12.82340186 | 4.13727570 | 6.81616551 |
| 6.62904078  | 0.60238561 | 6.80202494 |
| 14.01640337 | 0.54305373 | 6.82358705 |
| 8.52618083  | 2.08112887 | 6.79798169 |
| 1.04110744  | 2.01936319 | 6.80624249 |
| 3.68115126  | 6.04769239 | 6.70222042 |
| 11.16891220 | 6.08889569 | 6.64312102 |
| 5.07646639  | 8.08520288 | 5.51702428 |
| 12.50322308 | 8.06753098 | 5.52464428 |
| 9.13853880  | 5.27721584 | 5.37246878 |
| 1.68604287  | 5.23747466 | 5.37511437 |
| 3.01682276  | 1.71229356 | 5.26415403 |
| 10.46889722 | 1.72733822 | 5.24929694 |
| 7.30825599  | 3.67793719 | 5.21170604 |
| 14.74278328 | 3.65094869 | 5.20692258 |
| 5.48726399  | 2.09210525 | 5.10249622 |
| 12.92696006 | 2.07039783 | 5.12477048 |
| 7.51546989  | 7.25403707 | 5.02858348 |
| 14.97513260 | 7.24507152 | 5.01966969 |
| 2.54040916  | 7.65481939 | 4.92890279 |
| 9.98740656  | 7.67296595 | 4.90437242 |
| 5.68185308  | 5.66527423 | 4.81246911 |
| 13.14039949 | 5.65112201 | 4.80611539 |
| 3.80407176  | 4.10783756 | 4.74567484 |
| 11.24895404 | 4.11962401 | 4.74957248 |
| 7.94719437  | 1.22830506 | 4.55964555 |
| 0.49599476  | 1.21163813 | 4.56511301 |
| 9.24510097  | 3.28775048 | 3.49441624 |
| 1.79210067  | 3.28775048 | 3.49441624 |
| 5.93108559  | 0.40572783 | 3.30346417 |
| 13.38408565 | 0.40572783 | 3.30346417 |
| 4.47159576  | 7.26234245 | 3.24290895 |
| 11.92459583 | 7.26234245 | 3.24290895 |
| 7.61672831  | 5.24388313 | 3.15383196 |
| 15.06972790 | 5.24388313 | 3.15383196 |
| 2.63376808  | 5.66717625 | 3.03582549 |

|             |            |            |
|-------------|------------|------------|
| 10.08676815 | 5.66717625 | 3.03582549 |
| 4.26076746  | 2.43179297 | 2.93866873 |
| 11.71376801 | 2.43179297 | 2.93866873 |
| 9.89125442  | 0.84577286 | 2.82996941 |
| 2.43825460  | 0.84577286 | 2.82996941 |
| 6.72640657  | 2.78669548 | 2.80400848 |
| 14.17940712 | 2.78669548 | 2.80400848 |
| 8.45943737  | 7.64924812 | 2.68994594 |
| 1.00643730  | 7.64924812 | 2.68994594 |
| 5.09631491  | 4.84222126 | 2.52809286 |
| 12.54931545 | 4.84222126 | 2.52809286 |
| 6.42297029  | 6.83616877 | 1.40942586 |
| 13.87596989 | 6.83616877 | 1.40942586 |
| 8.68566036  | 2.45029783 | 1.24810267 |
| 1.23265994  | 2.45029783 | 1.24810267 |
| 3.15018106  | 3.96655679 | 1.23820484 |
| 10.60318089 | 3.96655679 | 1.23820484 |
| 4.33920240  | 0.37170255 | 1.20792723 |
| 11.79220295 | 0.37170255 | 1.20792723 |
| 6.82007313  | 0.80580682 | 1.04853928 |
| 14.27307320 | 0.80580682 | 1.04853928 |
| 8.95301247  | 6.01934624 | 0.88174963 |
| 1.50001240  | 6.01934624 | 0.88174963 |
| 6.94090939  | 4.36216164 | 0.80574113 |
| 14.39390945 | 4.36216164 | 0.80574113 |
| 4.05270052  | 6.32821703 | 0.79609853 |
| 11.50570011 | 6.32821703 | 0.79609853 |
| 5.10706043  | 2.69428372 | 0.63864446 |
| 12.56006050 | 2.69428372 | 0.63864446 |
| 9.31387520  | 0.04532212 | 0.55626547 |
| 1.86087537  | 0.04532212 | 0.55626547 |

# TS for CO dissociation on Fe<sub>5</sub>C<sub>2</sub>(021) with a C<sub>v</sub>

1.000000000000

|             |            |             |
|-------------|------------|-------------|
| 14.90600000 | 0.00000000 | 0.00000000  |
| 0.42323971  | 8.40334839 | 0.00000000  |
| 0.00000004  | 0.00000004 | 23.05140000 |

| C  | O | Fe |
|----|---|----|
| 36 | 1 | 80 |

Cart

|             |            |            |
|-------------|------------|------------|
| 2.16906253  | 5.31411016 | 7.50916312 |
| 2.71217309  | 1.98310741 | 7.64249565 |
| 10.19794211 | 2.00518232 | 7.66140113 |

|             |            |            |
|-------------|------------|------------|
| 9.65841274  | 5.33111170 | 7.51501148 |
| 5.15411377  | 8.23750633 | 7.43924410 |
| 12.64071250 | 8.28624247 | 7.44547186 |
| 6.56937620  | 2.43769624 | 6.88314549 |
| 13.99848520 | 2.54211198 | 6.93785561 |
| 8.41735925  | 0.19068015 | 6.24738097 |
| 0.93101055  | 0.15675522 | 6.26343468 |
| 7.27877065  | 5.55337003 | 6.00424937 |
| 13.05383712 | 3.76861504 | 4.10285899 |
| 9.23907523  | 3.28347675 | 5.44521937 |
| 1.78636274  | 3.26549153 | 5.43150632 |
| 3.70735144  | 6.06849325 | 4.69762836 |
| 11.15781609 | 6.06602398 | 4.68182967 |
| 5.61383373  | 3.76618651 | 4.10992705 |
| 14.69235591 | 5.54915799 | 6.03302963 |
| 4.13156597  | 0.74532485 | 3.95021989 |
| 11.58533001 | 0.74088400 | 3.95150515 |
| 6.45910597  | 6.85157728 | 3.36946511 |
| 13.91210556 | 6.85157728 | 3.36946511 |
| 7.93326235  | 1.23396885 | 2.61950350 |
| 0.48026219  | 1.23396885 | 2.61950350 |
| 2.91558671  | 7.36299515 | 2.03468370 |
| 10.36858654 | 7.36299515 | 2.03468370 |
| 8.76163578  | 4.32674265 | 1.79040837 |
| 1.30863547  | 4.32674265 | 1.79040837 |
| 3.18085384  | 1.97663546 | 1.14063549 |
| 10.63385391 | 1.97663546 | 1.14063549 |
| 4.93311071  | 4.62204313 | 0.60898984 |
| 12.38611031 | 4.62204313 | 0.60898984 |
| 7.97210503  | 7.58761215 | 0.54751450 |
| 0.51910490  | 7.58761215 | 0.54751450 |
| 6.98546123  | 2.51763773 | 0.40115634 |
| 14.43846130 | 2.51763773 | 0.40115634 |
| 6.51786106  | 3.53604782 | 8.31004269 |
| 7.87865074  | 4.57603769 | 7.53258945 |
| 0.40198333  | 4.43434676 | 7.50230320 |
| 4.57950978  | 1.76155168 | 7.40478488 |
| 12.07698778 | 1.82905396 | 7.43117731 |
| 6.11836189  | 6.59253112 | 7.24144017 |
| 13.54496185 | 6.57985895 | 7.27044038 |
| 2.73020685  | 0.13780871 | 7.23699437 |
| 10.25354714 | 0.16294995 | 7.24798719 |
| 8.72286269  | 6.93629797 | 7.18961592 |
| 1.16946260  | 6.86001107 | 7.17516379 |

|             |            |            |
|-------------|------------|------------|
| 2.88799193  | 3.69536104 | 6.99816262 |
| 10.36363786 | 3.69978418 | 7.00161282 |
| 5.35475464  | 4.17642002 | 6.98099373 |
| 12.83380571 | 4.13588523 | 6.82834745 |
| 6.56024937  | 0.50187140 | 6.82762290 |
| 14.00766179 | 0.54049197 | 6.82966964 |
| 8.50408221  | 2.03351642 | 6.79126259 |
| 1.02343959  | 2.04623379 | 6.79473066 |
| 3.72302362  | 6.09109094 | 6.65847872 |
| 11.20011623 | 6.08147009 | 6.64712627 |
| 5.05025861  | 8.05054218 | 5.51868689 |
| 12.51992228 | 8.06498323 | 5.52268014 |
| 9.14840751  | 5.26152738 | 5.37463620 |
| 1.69526994  | 5.26190466 | 5.36053829 |
| 2.99238964  | 1.71701395 | 5.24543016 |
| 10.46067563 | 1.72973366 | 5.23493090 |
| 7.27634162  | 3.62043042 | 5.27500742 |
| 14.74699386 | 3.66430929 | 5.21606304 |
| 5.43788612  | 2.06684911 | 5.11531270 |
| 12.92435054 | 2.07820939 | 5.11881253 |
| 7.52754505  | 7.25391239 | 5.01870789 |
| 14.97726516 | 7.24868789 | 5.02500714 |
| 2.53441057  | 7.66495608 | 4.89698541 |
| 10.00302500 | 7.67507798 | 4.89552057 |
| 5.69305708  | 5.64129795 | 4.82626247 |
| 13.14895041 | 5.65219716 | 4.81096421 |
| 3.81397527  | 4.10990704 | 4.76933493 |
| 11.26229632 | 4.11328915 | 4.74903933 |
| 7.94282828  | 1.22439283 | 4.55547811 |
| 0.48871478  | 1.22055615 | 4.55814856 |
| 9.24510097  | 3.28775048 | 3.49441624 |
| 1.79210067  | 3.28775048 | 3.49441624 |
| 5.93108559  | 0.40572783 | 3.30346417 |
| 13.38408565 | 0.40572783 | 3.30346417 |
| 4.47159576  | 7.26234245 | 3.24290895 |
| 11.92459583 | 7.26234245 | 3.24290895 |
| 7.61672831  | 5.24388313 | 3.15383196 |
| 15.06972790 | 5.24388313 | 3.15383196 |
| 2.63376808  | 5.66717625 | 3.03582549 |
| 10.08676815 | 5.66717625 | 3.03582549 |
| 4.26076746  | 2.43179297 | 2.93866873 |
| 11.71376801 | 2.43179297 | 2.93866873 |
| 9.89125442  | 0.84577286 | 2.82996941 |
| 2.43825460  | 0.84577286 | 2.82996941 |

|             |            |            |
|-------------|------------|------------|
| 6.72640657  | 2.78669548 | 2.80400848 |
| 14.17940712 | 2.78669548 | 2.80400848 |
| 8.45943737  | 7.64924812 | 2.68994594 |
| 1.00643730  | 7.64924812 | 2.68994594 |
| 5.09631491  | 4.84222126 | 2.52809286 |
| 12.54931545 | 4.84222126 | 2.52809286 |
| 6.42297029  | 6.83616877 | 1.40942586 |
| 13.87596989 | 6.83616877 | 1.40942586 |
| 8.68566036  | 2.45029783 | 1.24810267 |
| 1.23265994  | 2.45029783 | 1.24810267 |
| 3.15018106  | 3.96655679 | 1.23820484 |
| 10.60318089 | 3.96655679 | 1.23820484 |
| 4.33920240  | 0.37170255 | 1.20792723 |
| 11.79220295 | 0.37170255 | 1.20792723 |
| 6.82007313  | 0.80580682 | 1.04853928 |
| 14.27307320 | 0.80580682 | 1.04853928 |
| 8.95301247  | 6.01934624 | 0.88174963 |
| 1.50001240  | 6.01934624 | 0.88174963 |
| 6.94090939  | 4.36216164 | 0.80574113 |
| 14.39390945 | 4.36216164 | 0.80574113 |
| 4.05270052  | 6.32821703 | 0.79609853 |
| 11.50570011 | 6.32821703 | 0.79609853 |
| 5.10706043  | 2.69428372 | 0.63864446 |
| 12.56006050 | 2.69428372 | 0.63864446 |
| 9.31387520  | 0.04532212 | 0.55626547 |
| 1.86087537  | 0.04532212 | 0.55626547 |

# TS for CO dissociation on Fe<sub>5</sub>C<sub>2</sub>(111) without a C<sub>v</sub>

1.000000000000

|             |             |             |
|-------------|-------------|-------------|
| 12.37300000 | 0.00000000  | 0.00000000  |
| -2.07134726 | 13.30634571 | 0.00000000  |
| 0.00000004  | 0.00000005  | 22.12540000 |

|    |   |     |
|----|---|-----|
| C  | O | Fe  |
| 65 | 1 | 136 |

Cart

|             |             |             |
|-------------|-------------|-------------|
| 5.06690461  | 8.35549373  | 9.90467888  |
| 6.77813595  | 1.86205009  | 10.15418027 |
| 5.77426700  | 5.10709050  | 9.93121465  |
| -1.19020086 | 8.41138299  | 9.91336006  |
| -0.17574838 | 1.74221328  | 9.91829322  |
| 9.30371619  | 3.83741602  | 9.95997671  |
| 8.23812546  | 10.51975441 | 9.86094363  |
| 2.40780391  | 3.73468889  | 9.48821676  |



|             |             |            |
|-------------|-------------|------------|
| 2.03874727  | 10.50866389 | 9.89065863 |
| 6.73189437  | 5.75813415  | 6.87182434 |
| 4.68394636  | 11.71005320 | 9.73583372 |
| -1.51019745 | 11.77627077 | 9.77230493 |
| -0.47094256 | 5.06166644  | 9.67424015 |
| 9.25984373  | 0.20611544  | 9.37256648 |
| 8.18477149  | 6.75382681  | 9.33115864 |
| 3.11369329  | 0.09116220  | 9.32916850 |
| 1.93157946  | 6.89241867  | 9.39836731 |
| 5.03386062  | 2.95343610  | 8.38071984 |
| 5.77606106  | 12.40647705 | 6.94251386 |
| 0.57971481  | 5.74881573  | 6.94429937 |
| -0.50832098 | 12.42569511 | 6.86245041 |
| 9.42200104  | 7.69370125  | 6.73753746 |
| 4.21877672  | 0.95279141  | 6.61939835 |
| 3.25140625  | 7.68197728  | 6.78011233 |
| 10.50549726 | 1.03361422  | 6.74428892 |
| 7.54125775  | 2.04401376  | 6.58261846 |
| 6.42461824  | 8.71433905  | 6.60765098 |
| 1.28063351  | 2.10561897  | 6.68530055 |
| 0.26709221  | 8.70588579  | 6.60758133 |
| 9.08413218  | 10.67398359 | 6.25769199 |
| 3.82310412  | 3.99228400  | 6.12324256 |
| 2.90759674  | 10.64793884 | 6.25543823 |
| 10.12947285 | 4.02910274  | 6.29172786 |
| 8.44706331  | 2.90720534  | 3.88563091 |
| 7.38506834  | 9.55264092  | 3.87101528 |
| 2.18910083  | 2.88656005  | 3.83471877 |
| 1.20437810  | 9.55180436  | 3.87877817 |
| 4.87882185  | 4.85300732  | 3.51646113 |
| 3.84314847  | 11.50618076 | 3.51646113 |
| 11.06532192 | 4.85300732  | 3.51646113 |
| 10.02964878 | 11.50618076 | 3.51646113 |
| 8.08072281  | 5.89129591  | 3.40647149 |
| 7.04504919  | 12.54446888 | 3.40647149 |
| 1.89422262  | 5.89129591  | 3.40647149 |
| 0.85854894  | 12.54446888 | 3.40647149 |
| 5.59163237  | 1.16514635  | 3.18918610 |
| 4.55595875  | 7.81831932  | 3.18918610 |
| 11.77813244 | 1.16514635  | 3.18918610 |
| 10.74245834 | 7.81831932  | 3.18918610 |
| 9.29798985  | 6.73122358  | 0.77799785 |
| 4.14716339  | 0.07805078  | 0.77799785 |
| 3.11148977  | 6.73122358  | 0.77799785 |

|             |             |             |
|-------------|-------------|-------------|
| 10.33366299 | 0.07805078  | 0.77799785  |
| 6.68999243  | 1.82555234  | 0.41000685  |
| 5.65431881  | 8.47872543  | 0.41000685  |
| -0.53218126 | 8.47872543  | 0.41000685  |
| 0.50349241  | 1.82555234  | 0.41000685  |
| 9.34398174  | 3.05093241  | 0.30731282  |
| 8.30830765  | 9.70410538  | 0.30731282  |
| 3.15748167  | 3.05093241  | 0.30731282  |
| 2.12180805  | 9.70410538  | 0.30731282  |
| 6.31061268  | 5.17102432  | 0.23606260  |
| 5.27493906  | 11.82419777 | 0.23606260  |
| -0.91156107 | 11.82419777 | 0.23606260  |
| 0.12411259  | 5.17102432  | 0.23606260  |
| 3.52874300  | 3.53983996  | 10.82680223 |
| 6.93148491  | 2.54527526  | 8.34446521  |
| 7.71202418  | 8.68956452  | 9.88219518  |
| 2.90270425  | 1.90942880  | 9.96118948  |
| 1.46173300  | 8.72237063  | 9.90908040  |
| 5.43860576  | 3.25222545  | 10.18603404 |
| 3.97836078  | 9.96013725  | 9.87981644  |
| 11.16586793 | 3.34306276  | 9.89268690  |
| 10.16584281 | 10.02392079 | 9.89393970  |
| 9.96213564  | 5.56340860  | 9.57135309  |
| 8.94881733  | 12.24552030 | 9.62061222  |
| 3.75455283  | 5.37189674  | 9.62001844  |
| 2.76710059  | 12.18275401 | 9.53775086  |
| 7.13107556  | 0.19392911  | 9.40579358  |
| 6.07334862  | 6.85541102  | 9.44925080  |
| 0.93203112  | 0.29138631  | 9.47877429  |
| -0.19385277 | 6.91849600  | 9.44691372  |
| 7.65107300  | 4.80933046  | 9.44976654  |
| 6.65832959  | 11.56799701 | 9.08015266  |
| 1.39591723  | 5.15110598  | 8.81933476  |
| 0.41149211  | 11.52733508 | 9.21601367  |
| 9.77139137  | 7.81752291  | 8.70417998  |
| 4.72784745  | 1.10271539  | 8.56209411  |
| 3.61871226  | 7.70456968  | 8.77433065  |
| 10.85360194 | 1.17709991  | 8.69775022  |
| 8.68360821  | 2.03981606  | 9.97361982  |
| 5.86209719  | 9.22395804  | 8.41182247  |
| 0.85299819  | 2.64675133  | 8.55953298  |
| -0.35608052 | 9.24123812  | 8.38785719  |
| 9.39037667  | 3.31648763  | 8.02146153  |
| 8.41939631  | 9.95193754  | 7.97991375  |

|             |             |            |
|-------------|-------------|------------|
| 3.23891670  | 3.29068601  | 7.85024728 |
| 2.22439905  | 9.94178714  | 7.99592289 |
| 5.52164384  | 4.75667432  | 8.00456217 |
| 4.45075869  | 11.36704025 | 7.85256360 |
| 11.56840916 | 4.70602411  | 7.80961596 |
| -1.76006622 | 11.39842425 | 7.87087617 |
| 8.73126908  | 0.75230994  | 7.54783818 |
| 7.63387262  | 7.42205684  | 7.53350352 |
| 2.50909547  | 0.73868904  | 7.55194239 |
| 1.46869576  | 7.41611675  | 7.55910898 |
| 9.38573678  | 5.70667109  | 7.01528441 |
| 8.39699514  | 12.35319882 | 6.99939539 |
| 3.25177330  | 5.69006280  | 6.95873167 |
| 2.23657390  | 12.31828515 | 7.00468928 |
| 6.42782621  | 0.43123118  | 6.81487771 |
| 5.31445187  | 7.09838537  | 6.90925352 |
| -0.86885691 | 7.11099579  | 6.88174611 |
| 0.19158335  | 0.48886048  | 6.90614733 |
| 5.28276624  | 2.64658054  | 6.44304276 |
| 4.31350364  | 9.28836939  | 6.48921755 |
| 11.55441774 | 2.66178507  | 6.50854437 |
| 10.49125071 | 9.30910133  | 6.45801806 |
| 7.50901271  | 4.04975072  | 6.34863616 |
| 6.49883157  | 10.70423320 | 6.36113772 |
| 1.34123831  | 4.05761941  | 6.31251326 |
| 0.30521788  | 10.71780376 | 6.38332873 |
| 9.27840001  | 2.32033774  | 5.62856332 |
| 8.20822274  | 8.95173530  | 5.61015700 |
| 3.03093484  | 2.24876469  | 5.55075146 |
| 2.02583489  | 8.95342660  | 5.62765869 |
| 5.35014260  | 5.02621024  | 5.43536026 |
| 4.35266030  | 11.66097732 | 5.39476191 |
| 11.55567193 | 5.05041301  | 5.39203220 |
| 10.52572130 | 11.70315113 | 5.40637471 |
| 7.53298866  | 6.42226241  | 5.23679985 |
| 6.50822789  | 13.07487293 | 5.23887577 |
| 1.34065786  | 6.41709527  | 5.24277766 |
| 0.34612841  | 13.06532427 | 5.24440157 |
| 9.97652008  | 7.15757916  | 4.89509172 |
| 4.87256115  | 0.46892725  | 4.87259285 |
| 3.78812843  | 7.16227112  | 4.89865684 |
| 11.02366552 | 0.49881242  | 4.89957894 |
| 7.01241752  | 1.87787497  | 4.73482359 |
| 5.94561905  | 8.52898906  | 4.73895302 |

|             |             |            |
|-------------|-------------|------------|
| 0.77549532  | 1.87149395  | 4.75770545 |
| -0.23154217 | 8.52712830  | 4.73976955 |
| 9.30100298  | 4.63003661  | 4.53707143 |
| 8.27143233  | 11.27388932 | 4.52039092 |
| 3.11230784  | 4.60876420  | 4.45460038 |
| 2.08494254  | 11.26645811 | 4.52224129 |
| 4.86458023  | 2.86012994  | 3.79297429 |
| 3.81171706  | 9.51258211  | 3.78890497 |
| 11.03018436 | 2.86274632  | 3.78306301 |
| 10.00154495 | 9.51687145  | 3.78704119 |
| 7.02151012  | 4.27133465  | 3.67187500 |
| 5.98583651  | 10.92450714 | 3.67187500 |
| 0.83500999  | 4.27133465  | 3.67187500 |
| -0.20066364 | 10.92450714 | 3.67187500 |
| 5.98730040  | 6.46236563  | 3.26705837 |
| 4.95162678  | 13.11553860 | 3.26705837 |
| -1.23487330 | 13.11553860 | 3.26705837 |
| -0.19919968 | 6.46236563  | 3.26705837 |
| 9.13459015  | 1.21606314  | 3.15154004 |
| 8.09891701  | 7.86923599  | 3.15154004 |
| 2.94809031  | 1.21606314  | 3.15154004 |
| 1.91241682  | 7.86923599  | 3.15154004 |
| 9.86151791  | 6.16859675  | 2.57775974 |
| 8.82584381  | 12.82176971 | 2.57775974 |
| 3.67501736  | 6.16859675  | 2.57775974 |
| 2.63934374  | 12.82176971 | 2.57775974 |
| 6.94373321  | 2.19821787  | 2.29912543 |
| 5.90805960  | 8.85139084  | 2.29912543 |
| 0.75723332  | 2.19821787  | 2.29912543 |
| -0.27844033 | 8.85139084  | 2.29912543 |
| 9.14488697  | 3.62169242  | 2.16933250 |
| 8.10921383  | 10.27486515 | 2.16933250 |
| 2.95838714  | 3.62169242  | 2.16933250 |
| 1.92271352  | 10.27486515 | 2.16933250 |
| 5.48859596  | 4.32356119  | 1.73705697 |
| 4.45292234  | 10.97673416 | 1.73705697 |
| 11.67509651 | 4.32356119  | 1.73705697 |
| 10.63942242 | 10.97673416 | 1.73705697 |
| 7.71047688  | 5.75025272  | 1.45817900 |
| 6.67480278  | 12.40342522 | 1.45817900 |
| 1.52397668  | 5.75025272  | 1.45817900 |
| 0.48830301  | 12.40342522 | 1.45817900 |
| 9.87633419  | 8.59665012  | 1.13008654 |
| 4.72550774  | 1.94347775  | 1.13008654 |

|             |             |            |
|-------------|-------------|------------|
| 3.68983388  | 8.59665012  | 1.13008654 |
| 10.91200733 | 1.94347775  | 1.13008654 |
| 6.35504007  | 0.01628161  | 0.72841984 |
| 5.31936645  | 6.66945457  | 0.72841984 |
| -0.86713374 | 6.66945457  | 0.72841984 |
| 0.16853991  | 0.01628161  | 0.72841984 |
| 8.61688709  | 1.34844887  | 0.55037773 |
| 7.58121395  | 8.00162220  | 0.55037773 |
| 2.43038750  | 1.34844887  | 0.55037773 |
| 1.39471376  | 8.00162220  | 0.55037773 |
| 7.38836098  | 3.56898689  | 0.26360172 |
| 6.35268736  | 10.22215939 | 0.26360172 |
| 1.20186114  | 3.56898689  | 0.26360172 |
| 0.16618745  | 10.22215939 | 0.26360172 |
| 9.81825924  | 4.88769627  | 0.25251889 |
| 8.78258514  | 11.54086876 | 0.25251889 |
| 3.63175869  | 4.88769627  | 0.25251889 |
| 2.59608507  | 11.54086876 | 0.25251889 |

# TS for CO dissociation on Fe<sub>5</sub>C<sub>2</sub>(111) with a C<sub>v</sub>

1.000000000000

|             |             |             |
|-------------|-------------|-------------|
| 12.37300000 | 0.00000000  | 0.00000000  |
| -2.07134726 | 13.30634571 | 0.00000000  |
| 0.00000004  | 0.00000005  | 22.12540100 |
| C           | O           | Fe          |
| 64          | 1           | 136         |

Cart

|             |             |            |
|-------------|-------------|------------|
| 2.33690376  | 3.77682780  | 9.42831009 |
| 6.34352568  | 1.75366777  | 9.88731698 |
| 5.03086904  | 8.37347395  | 9.90100754 |
| -1.23249439 | 8.46245085  | 9.93019275 |
| -0.22490981 | 1.78447699  | 9.90214670 |
| 9.17400301  | 3.87079964  | 9.82406366 |
| 8.19706097  | 10.53325386 | 9.84524645 |
| 1.98067978  | 10.51954899 | 9.82581952 |
| 5.69982844  | 5.03302827  | 9.69641514 |
| 4.66185065  | 11.68562647 | 9.71673811 |
| -1.53507655 | 11.79016441 | 9.73665469 |
| -0.53681699 | 5.09772978  | 9.67965771 |
| 9.21717063  | 0.19735524  | 9.34928922 |
| 8.18648599  | 6.84477380  | 9.36233162 |
| 3.17067392  | 0.14415431  | 9.35834535 |
| 1.97052950  | 6.87298269  | 9.38789957 |

|             |             |            |
|-------------|-------------|------------|
| 6.78166339  | 5.74512443  | 6.93771070 |
| 5.73990924  | 12.39831100 | 6.92824512 |
| 0.57167667  | 5.74568493  | 6.96467126 |
| -0.43587897 | 12.42041344 | 6.95671038 |
| 9.42761809  | 7.69546355  | 6.73918935 |
| 4.29549097  | 1.04095061  | 6.72781828 |
| 3.23707228  | 7.67033769  | 6.75538537 |
| 10.50123506 | 1.03002118  | 6.73760408 |
| 7.51821455  | 2.04765805  | 6.57640180 |
| 6.43740112  | 8.70471214  | 6.60446167 |
| 1.29498361  | 2.09538850  | 6.69133053 |
| 0.25730962  | 8.71955738  | 6.62140263 |
| 9.08882256  | 10.67615207 | 6.26187511 |
| 3.94466995  | 4.00812610  | 6.25160048 |
| 2.90865501  | 10.66164502 | 6.26054747 |
| 10.13655907 | 4.02107831  | 6.26565848 |
| 8.43259705  | 2.90522354  | 3.87415236 |
| 7.38535899  | 9.55260583  | 3.87167821 |
| 2.22946549  | 2.89775889  | 3.87269491 |
| 1.20058125  | 9.55175654  | 3.87522293 |
| 4.87882185  | 4.85300732  | 3.51646113 |
| 3.84314847  | 11.50618076 | 3.51646113 |
| 11.06532192 | 4.85300732  | 3.51646113 |
| 10.02964878 | 11.50618076 | 3.51646113 |
| 8.08072281  | 5.89129591  | 3.40647149 |
| 7.04504919  | 12.54446888 | 3.40647149 |
| 1.89422262  | 5.89129591  | 3.40647149 |
| 0.85854894  | 12.54446888 | 3.40647149 |
| 5.59163237  | 1.16514635  | 3.18918610 |
| 4.55595875  | 7.81831932  | 3.18918610 |
| 11.77813244 | 1.16514635  | 3.18918610 |
| 10.74245834 | 7.81831932  | 3.18918610 |
| 9.29798985  | 6.73122358  | 0.77799785 |
| 4.14716339  | 0.07805078  | 0.77799785 |
| 3.11148977  | 6.73122358  | 0.77799785 |
| 10.33366299 | 0.07805078  | 0.77799785 |
| 6.68999243  | 1.82555234  | 0.41000685 |
| 5.65431881  | 8.47872543  | 0.41000685 |
| -0.53218126 | 8.47872543  | 0.41000685 |
| 0.50349241  | 1.82555234  | 0.41000685 |
| 9.34398174  | 3.05093241  | 0.30731282 |
| 8.30830765  | 9.70410538  | 0.30731282 |
| 3.15748167  | 3.05093241  | 0.30731282 |
| 2.12180805  | 9.70410538  | 0.30731282 |

|             |             |             |
|-------------|-------------|-------------|
| 6.31061268  | 5.17102432  | 0.23606260  |
| 5.27493906  | 11.82419777 | 0.23606260  |
| -0.91156107 | 11.82419777 | 0.23606260  |
| 0.12411259  | 5.17102432  | 0.23606260  |
| 3.39489046  | 3.57344631  | 10.86596046 |
| 8.59470652  | 2.05461173  | 9.88283631  |
| 7.65594307  | 8.70570332  | 9.88413292  |
| 2.85445378  | 1.93772353  | 9.98540346  |
| 1.50070419  | 8.69712516  | 9.89763152  |
| 5.13247331  | 3.24695985  | 10.00752184 |
| 3.93808598  | 9.95529716  | 9.85221792  |
| 11.08784253 | 3.36449659  | 9.85235264  |
| 10.11856326 | 10.05285890 | 9.88306063  |
| 9.89923018  | 5.59035111  | 9.59065137  |
| 8.91195069  | 12.25950637 | 9.60532691  |
| 3.68861457  | 5.36683574  | 9.55827371  |
| 2.74203068  | 12.18993579 | 9.57219990  |
| 7.12140468  | 0.15282173  | 9.36242895  |
| 5.98697318  | 6.85329399  | 9.41532137  |
| 0.86494284  | 0.32151764  | 9.46100807  |
| -0.25110549 | 6.96367761  | 9.45932078  |
| 7.63091844  | 4.97139568  | 8.99482370  |
| 6.64302289  | 11.57351194 | 9.01144738  |
| 1.30319778  | 5.19311125  | 8.83074080  |
| 0.41230962  | 11.64547179 | 9.02123740  |
| 9.76992855  | 7.84808370  | 8.69510878  |
| 4.80018956  | 1.16568581  | 8.67712272  |
| 3.61902983  | 7.71978101  | 8.73003376  |
| 10.81020998 | 1.18333905  | 8.69327554  |
| 6.89016203  | 2.61303932  | 8.30722746  |
| 5.83247404  | 9.22399425  | 8.39238977  |
| 0.84682164  | 2.66328606  | 8.55039983  |
| -0.36578745 | 9.26135468  | 8.40677865  |
| 9.37341279  | 3.29324261  | 7.95323690  |
| 8.38739695  | 9.95305796  | 7.97145263  |
| 3.36203638  | 3.22114341  | 7.95473109  |
| 2.18809754  | 9.93764057  | 7.96749565  |
| 5.43046292  | 4.69429990  | 7.83779406  |
| 4.40281921  | 11.35711078 | 7.82954598  |
| 11.52002238 | 4.71654610  | 7.80509909  |
| 10.57648649 | 11.39809191 | 7.85071132  |
| 8.70888219  | 0.74585913  | 7.52324367  |
| 7.63633166  | 7.40474805  | 7.55685317  |
| 2.54808128  | 0.75269356  | 7.59949570  |

|             |             |            |
|-------------|-------------|------------|
| 1.45407043  | 7.42289530  | 7.56723407 |
| 9.38105718  | 5.71233284  | 6.96891601 |
| 8.39528004  | 12.36039782 | 6.98514400 |
| 3.23099826  | 5.68689027  | 6.97592365 |
| 2.20856069  | 12.35152496 | 6.98889140 |
| 6.39834521  | 0.44291083  | 6.83192962 |
| 5.32801515  | 7.08897911  | 6.86922185 |
| -0.86736806 | 7.11841816  | 6.87233195 |
| 0.22049652  | 0.48172499  | 6.90976406 |
| 5.35423407  | 2.64127461  | 6.41452655 |
| 4.30105480  | 9.28301112  | 6.47019894 |
| 11.54982874 | 2.65101162  | 6.50283467 |
| 10.49005008 | 9.31285836  | 6.46347792 |
| 7.51211177  | 4.05613159  | 6.31028872 |
| 6.48392622  | 10.70013958 | 6.34739672 |
| 1.33413623  | 4.05328549  | 6.34538593 |
| 0.29385784  | 10.71603886 | 6.35731700 |
| 9.27368594  | 2.29961135  | 5.60248123 |
| 8.20714331  | 8.95049935  | 5.61365363 |
| 3.05344908  | 2.28536580  | 5.60833383 |
| 2.01978709  | 8.94980621  | 5.61883000 |
| 5.37491434  | 5.04156028  | 5.39151759 |
| 4.34331870  | 11.67643101 | 5.38879314 |
| 11.56565772 | 5.04667419  | 5.38959844 |
| 10.52753809 | 11.70974481 | 5.40243143 |
| 7.52601522  | 6.42416998  | 5.23791782 |
| 6.50590846  | 13.06672248 | 5.23574184 |
| 1.34078753  | 6.41241133  | 5.25257954 |
| 0.31347870  | 13.07594198 | 5.25686603 |
| 9.97454283  | 7.16030044  | 4.89161535 |
| 4.82755904  | 0.49576723  | 4.88940096 |
| 3.78261184  | 7.15677077  | 4.89365522 |
| 11.03687316 | 0.50078780  | 4.90011257 |
| 7.00540804  | 1.86722668  | 4.71990042 |
| 5.94729594  | 8.52769890  | 4.73579900 |
| 0.80205726  | 1.87808201  | 4.76610924 |
| -0.23448084 | 8.52754616  | 4.74291799 |
| 9.30812731  | 4.62625316  | 4.52324121 |
| 8.27114430  | 11.27427847 | 4.52351736 |
| 3.11873893  | 4.61677945  | 4.51864325 |
| 2.07947746  | 11.27260568 | 4.52486916 |
| 4.85254870  | 2.86020762  | 3.78663891 |
| 3.81029260  | 9.51354550  | 3.78786587 |
| 11.04088509 | 2.86110899  | 3.78395749 |



|             |             |            |
|-------------|-------------|------------|
| 10.00154495 | 9.51687145  | 3.78704119 |
| 7.02151012  | 4.27133465  | 3.67187500 |
| 5.98583651  | 10.92450714 | 3.67187500 |
| 0.83500999  | 4.27133465  | 3.67187500 |
| -0.20066364 | 10.92450714 | 3.67187500 |
| 5.98730040  | 6.46236563  | 3.26705837 |
| 4.95162678  | 13.11553860 | 3.26705837 |
| -1.23487330 | 13.11553860 | 3.26705837 |
| -0.19919968 | 6.46236563  | 3.26705837 |
| 9.13459015  | 1.21606314  | 3.15154004 |
| 8.09891701  | 7.86923599  | 3.15154004 |
| 2.94809031  | 1.21606314  | 3.15154004 |
| 1.91241682  | 7.86923599  | 3.15154004 |
| 9.86151791  | 6.16859675  | 2.57775974 |
| 8.82584381  | 12.82176971 | 2.57775974 |
| 3.67501736  | 6.16859675  | 2.57775974 |
| 2.63934374  | 12.82176971 | 2.57775974 |
| 6.94373321  | 2.19821787  | 2.29912543 |
| 5.90805960  | 8.85139084  | 2.29912543 |
| 0.75723332  | 2.19821787  | 2.29912543 |
| -0.27844033 | 8.85139084  | 2.29912543 |
| 9.14488697  | 3.62169242  | 2.16933250 |
| 8.10921383  | 10.27486515 | 2.16933250 |
| 2.95838714  | 3.62169242  | 2.16933250 |
| 1.92271352  | 10.27486515 | 2.16933250 |
| 5.48859596  | 4.32356119  | 1.73705697 |
| 4.45292234  | 10.97673416 | 1.73705697 |
| 11.67509651 | 4.32356119  | 1.73705697 |
| 10.63942242 | 10.97673416 | 1.73705697 |
| 7.71047688  | 5.75025272  | 1.45817900 |
| 6.67480278  | 12.40342522 | 1.45817900 |
| 1.52397668  | 5.75025272  | 1.45817900 |
| 0.48830301  | 12.40342522 | 1.45817900 |
| 9.87633419  | 8.59665012  | 1.13008654 |
| 4.72550774  | 1.94347775  | 1.13008654 |
| 3.68983388  | 8.59665012  | 1.13008654 |
| 10.91200733 | 1.94347775  | 1.13008654 |
| 6.35504007  | 0.01628161  | 0.72841984 |
| 5.31936645  | 6.66945457  | 0.72841984 |
| -0.86713374 | 6.66945457  | 0.72841984 |
| 0.16853991  | 0.01628161  | 0.72841984 |
| 8.61688709  | 1.34844887  | 0.55037773 |
| 7.58121395  | 8.00162220  | 0.55037773 |
| 2.43038750  | 1.34844887  | 0.55037773 |

|            |             |            |
|------------|-------------|------------|
| 1.39471376 | 8.00162220  | 0.55037773 |
| 7.38836098 | 3.56898689  | 0.26360172 |
| 6.35268736 | 10.22215939 | 0.26360172 |
| 1.20186114 | 3.56898689  | 0.26360172 |
| 0.16618745 | 10.22215939 | 0.26360172 |
| 9.81825924 | 4.88769627  | 0.25251889 |
| 8.78258514 | 11.54086876 | 0.25251889 |
| 3.63175869 | 4.88769627  | 0.25251889 |
| 2.59608507 | 11.54086876 | 0.25251889 |

# TS for CO dissociation on Fe<sub>5</sub>C<sub>2</sub>(111) with a C<sub>v</sub>

1.000000000000

|             |             |             |
|-------------|-------------|-------------|
| 12.37300000 | 0.00000000  | 0.00000000  |
| -2.07134726 | 13.30634571 | 0.00000000  |
| 0.00000004  | 0.00000005  | 22.12540100 |

|    |   |     |
|----|---|-----|
| C  | O | Fe  |
| 64 | 1 | 136 |

Cart

|             |             |            |
|-------------|-------------|------------|
| 2.28433068  | 3.79162773  | 9.43111638 |
| 6.37170777  | 1.64385671  | 9.89958205 |
| 5.35415402  | 8.29664825  | 9.88295442 |
| 10.99299888 | 8.51851228  | 9.91770963 |
| 1.27714273  | 2.09037112  | 6.68850760 |
| 9.21834354  | 3.79845530  | 9.95796686 |
| 8.15456615  | 10.47704835 | 9.91981320 |
| -0.45507443 | 12.40666041 | 6.98080794 |
| 5.56712474  | 4.98100800  | 9.80723451 |
| 4.55944057  | 11.65164812 | 9.77647787 |
| -1.58933081 | 11.79531673 | 9.66512639 |
| -0.59697535 | 5.18225483  | 9.63385236 |
| 9.16197197  | 0.09111637  | 9.30849316 |
| 8.10073155  | 6.69034524  | 9.30245151 |
| 3.07594569  | 0.20637990  | 9.39656126 |
| 2.29227225  | 6.69616125  | 9.32146304 |
| 6.75042733  | 5.75905518  | 6.87619738 |
| 5.70500460  | 12.41288179 | 6.87836770 |
| 0.54696402  | 5.75156739  | 6.98537481 |
| 1.27568787  | 10.48551730 | 9.44480489 |
| 9.43226691  | 7.69613834  | 6.73563268 |
| 4.28194463  | 1.03790041  | 6.74490438 |
| 3.21641633  | 7.69022519  | 6.73789164 |
| 10.48299679 | 1.03804233  | 6.73693530 |
| 7.50012486  | 2.04602551  | 6.53889145 |

|             |             |             |
|-------------|-------------|-------------|
| 6.46193149  | 8.69575695  | 6.52596226  |
| -0.26259483 | 1.85434423  | 9.91867827  |
| 0.22515446  | 8.73897907  | 6.69904605  |
| 9.08881207  | 10.67759489 | 6.27342381  |
| 3.92923366  | 4.01332878  | 6.24468142  |
| 2.89217984  | 10.65732806 | 6.24148807  |
| 10.11444823 | 4.01987692  | 6.27683896  |
| 8.43478435  | 2.90730841  | 3.87261168  |
| 7.39697707  | 9.56080444  | 3.86927186  |
| 2.23082112  | 2.89781107  | 3.87462167  |
| 1.19375787  | 9.54875015  | 3.87732343  |
| 4.87882185  | 4.85300732  | 3.51646113  |
| 3.84314847  | 11.50618076 | 3.51646113  |
| 11.06532192 | 4.85300732  | 3.51646113  |
| 10.02964878 | 11.50618076 | 3.51646113  |
| 8.08072281  | 5.89129591  | 3.40647149  |
| 7.04504919  | 12.54446888 | 3.40647149  |
| 1.89422262  | 5.89129591  | 3.40647149  |
| 0.85854894  | 12.54446888 | 3.40647149  |
| 5.59163237  | 1.16514635  | 3.18918610  |
| 4.55595875  | 7.81831932  | 3.18918610  |
| 11.77813244 | 1.16514635  | 3.18918610  |
| 10.74245834 | 7.81831932  | 3.18918610  |
| 9.29798985  | 6.73122358  | 0.77799785  |
| 4.14716339  | 0.07805078  | 0.77799785  |
| 3.11148977  | 6.73122358  | 0.77799785  |
| 10.33366299 | 0.07805078  | 0.77799785  |
| 6.68999243  | 1.82555234  | 0.41000685  |
| 5.65431881  | 8.47872543  | 0.41000685  |
| -0.53218126 | 8.47872543  | 0.41000685  |
| 0.50349241  | 1.82555234  | 0.41000685  |
| 9.34398174  | 3.05093241  | 0.30731282  |
| 8.30830765  | 9.70410538  | 0.30731282  |
| 3.15748167  | 3.05093241  | 0.30731282  |
| 2.12180805  | 9.70410538  | 0.30731282  |
| 6.31061268  | 5.17102432  | 0.23606260  |
| 5.27493906  | 11.82419777 | 0.23606260  |
| -0.91156107 | 11.82419777 | 0.23606260  |
| 0.12411259  | 5.17102432  | 0.23606260  |
| 1.30985887  | 7.27253402  | 10.87321249 |
| 10.77532675 | 1.19404464  | 8.71643148  |
| 7.52375533  | 8.65121449  | 9.88285174  |
| 2.90652886  | 2.06102503  | 9.96825202  |
| 3.78171599  | 7.72179059  | 8.70548150  |

|             |             |             |
|-------------|-------------|-------------|
| 5.24810054  | 3.14443470  | 9.89844135  |
| 2.60998006  | 11.96296192 | 9.52775797  |
| 11.09307709 | 3.41203216  | 9.86397204  |
| 4.22476359  | 9.81763789  | 9.89200490  |
| 9.84496575  | 5.56105385  | 9.54301652  |
| 10.01669123 | 10.08139080 | 9.86321195  |
| 3.62144917  | 5.21714440  | 9.53618909  |
| 4.45715130  | 11.33802418 | 7.85766480  |
| 8.56506194  | 1.99364461  | 9.90976212  |
| 6.08930826  | 6.70422878  | 9.32868074  |
| 10.47439100 | 11.36780311 | 7.80086761  |
| -0.21588895 | 7.07453850  | 9.78238796  |
| 7.54360971  | 4.69403559  | 9.48958019  |
| 7.11807733  | 0.07227783  | 9.32179221  |
| 1.22804343  | 5.20010258  | 8.81134082  |
| 0.23070602  | 11.88469964 | 8.83507093  |
| 9.72853977  | 7.80710905  | 8.71831340  |
| 4.78583542  | 1.04353783  | 8.71659358  |
| 2.35454923  | 9.91343426  | 7.96382734  |
| 8.82712499  | 12.23767822 | 9.55484729  |
| 6.92368422  | 2.55285504  | 8.28957914  |
| 5.88331021  | 9.20129214  | 8.27334594  |
| 0.83778374  | 2.68769164  | 8.54657111  |
| -0.23044164 | 9.33884428  | 8.55781079  |
| 9.36904176  | 3.29440516  | 8.00382082  |
| 8.34761563  | 9.94856667  | 7.98337746  |
| 3.40227366  | 3.23486767  | 7.96369843  |
| 1.87412681  | 8.81611623  | 10.03234091 |
| 5.51306364  | 4.68117824  | 7.87253514  |
| 6.53653805  | 11.39519624 | 9.32513048  |
| 11.48881148 | 4.68824703  | 7.78623903  |
| 0.81749303  | 0.39247862  | 9.52249588  |
| 8.69178268  | 0.76841980  | 7.49824026  |
| 7.65064453  | 7.43247301  | 7.49493898  |
| 2.52668697  | 0.78969867  | 7.59628218  |
| 1.47859730  | 7.44921761  | 7.66991355  |
| 9.36753606  | 5.70572037  | 6.99554735  |
| 8.34638967  | 12.36334591 | 6.99246102  |
| 3.24909004  | 5.69134700  | 7.00958091  |
| 2.21227925  | 12.34544989 | 6.97314945  |
| 6.37191737  | 0.44061476  | 6.83029099  |
| 5.33835264  | 7.08356018  | 6.81775417  |
| -0.85920444 | 7.13062279  | 6.92901590  |
| 0.18569057  | 0.48023581  | 6.92764076  |

|             |             |            |
|-------------|-------------|------------|
| 5.35399862  | 2.63912026  | 6.41135681 |
| 4.30716394  | 9.28304894  | 6.41715178 |
| 11.54313587 | 2.64950270  | 6.49470276 |
| 10.50896948 | 9.30207589  | 6.50484244 |
| 7.51417051  | 4.05872800  | 6.32080221 |
| 6.47830775  | 10.71542915 | 6.32984848 |
| 1.34058622  | 4.06271068  | 6.35720167 |
| 0.30134986  | 10.70591063 | 6.36069023 |
| 9.26865216  | 2.31666056  | 5.60352396 |
| 8.22994045  | 8.97610047  | 5.59835134 |
| 3.05188337  | 2.29069418  | 5.61622377 |
| 2.00061127  | 8.93179772  | 5.63474366 |
| 5.37011356  | 5.02160522  | 5.39545124 |
| 4.33477050  | 11.67556090 | 5.39156594 |
| 11.56369580 | 5.05676102  | 5.39412281 |
| 10.53244912 | 11.70882951 | 5.39592782 |
| 7.53719085  | 6.43564491  | 5.22095934 |
| 6.50108795  | 13.08321535 | 5.22392859 |
| 1.34080333  | 6.41898447  | 5.28493369 |
| 0.30491237  | 13.06808003 | 5.26388569 |
| 9.99521829  | 7.15715381  | 4.90396782 |
| 4.81455937  | 0.49777441  | 4.88763386 |
| 3.77452901  | 7.14941690  | 4.89157976 |
| 11.02892406 | 0.50313203  | 4.89982671 |
| 6.99839669  | 1.86702907  | 4.70294020 |
| 5.95529176  | 8.52446326  | 4.69960196 |
| 0.80120570  | 1.87857664  | 4.76536863 |
| -0.23824044 | 8.52746996  | 4.76680376 |
| 9.30778300  | 4.63132589  | 4.52604761 |
| 8.27261360  | 11.28652750 | 4.52595393 |
| 3.11275524  | 4.61653459  | 4.51666195 |
| 2.07717889  | 11.26408579 | 4.51265014 |
| 4.84754821  | 2.86161917  | 3.78175267 |
| 3.80833867  | 9.51237148  | 3.78658289 |
| 11.03897990 | 2.86286138  | 3.78405325 |
| 10.00154495 | 9.51687145  | 3.78704119 |
| 7.02151012  | 4.27133465  | 3.67187500 |
| 5.98583651  | 10.92450714 | 3.67187500 |
| 0.83500999  | 4.27133465  | 3.67187500 |
| -0.20066364 | 10.92450714 | 3.67187500 |
| 5.98730040  | 6.46236563  | 3.26705837 |
| 4.95162678  | 13.11553860 | 3.26705837 |
| -1.23487330 | 13.11553860 | 3.26705837 |
| -0.19919968 | 6.46236563  | 3.26705837 |

|             |             |            |
|-------------|-------------|------------|
| 9.13459015  | 1.21606314  | 3.15154004 |
| 8.09891701  | 7.86923599  | 3.15154004 |
| 2.94809031  | 1.21606314  | 3.15154004 |
| 1.91241682  | 7.86923599  | 3.15154004 |
| 9.86151791  | 6.16859675  | 2.57775974 |
| 8.82584381  | 12.82176971 | 2.57775974 |
| 3.67501736  | 6.16859675  | 2.57775974 |
| 2.63934374  | 12.82176971 | 2.57775974 |
| 6.94373321  | 2.19821787  | 2.29912543 |
| 5.90805960  | 8.85139084  | 2.29912543 |
| 0.75723332  | 2.19821787  | 2.29912543 |
| -0.27844033 | 8.85139084  | 2.29912543 |
| 9.14488697  | 3.62169242  | 2.16933250 |
| 8.10921383  | 10.27486515 | 2.16933250 |
| 2.95838714  | 3.62169242  | 2.16933250 |
| 1.92271352  | 10.27486515 | 2.16933250 |
| 5.48859596  | 4.32356119  | 1.73705697 |
| 4.45292234  | 10.97673416 | 1.73705697 |
| 11.67509651 | 4.32356119  | 1.73705697 |
| 10.63942242 | 10.97673416 | 1.73705697 |
| 7.71047688  | 5.75025272  | 1.45817900 |
| 6.67480278  | 12.40342522 | 1.45817900 |
| 1.52397668  | 5.75025272  | 1.45817900 |
| 0.48830301  | 12.40342522 | 1.45817900 |
| 9.87633419  | 8.59665012  | 1.13008654 |
| 4.72550774  | 1.94347775  | 1.13008654 |
| 3.68983388  | 8.59665012  | 1.13008654 |
| 10.91200733 | 1.94347775  | 1.13008654 |
| 6.35504007  | 0.01628161  | 0.72841984 |
| 5.31936645  | 6.66945457  | 0.72841984 |
| -0.86713374 | 6.66945457  | 0.72841984 |
| 0.16853991  | 0.01628161  | 0.72841984 |
| 8.61688709  | 1.34844887  | 0.55037773 |
| 7.58121395  | 8.00162220  | 0.55037773 |
| 2.43038750  | 1.34844887  | 0.55037773 |
| 1.39471376  | 8.00162220  | 0.55037773 |
| 7.38836098  | 3.56898689  | 0.26360172 |
| 6.35268736  | 10.22215939 | 0.26360172 |
| 1.20186114  | 3.56898689  | 0.26360172 |
| 0.16618745  | 10.22215939 | 0.26360172 |
| 9.81825924  | 4.88769627  | 0.25251889 |
| 8.78258514  | 11.54086876 | 0.25251889 |
| 3.63175869  | 4.88769627  | 0.25251889 |
| 2.59608507  | 11.54086876 | 0.25251889 |

# TS for CO dissociation on Fe<sub>3</sub>C(031) without a C<sub>v</sub>

1.000000000000

|             |             |             |
|-------------|-------------|-------------|
| 10.06780000 | 0.00000000  | 0.00000000  |
| 0.00000003  | 14.99310000 | 0.00000000  |
| 0.00000004  | 0.00000004  | 22.23570000 |

|    |   |    |
|----|---|----|
| C  | O | Fe |
| 41 | 1 | 96 |

Cart

|            |             |            |
|------------|-------------|------------|
| 2.80576365 | 7.44925591  | 6.51882491 |
| 3.29337795 | 10.00216602 | 7.75650065 |
| 8.40630244 | 9.97050417  | 7.66903384 |
| 0.99305307 | 2.45695064  | 7.69586686 |
| 6.08382250 | 2.48101039  | 7.65151688 |
| 4.12754302 | 12.63898832 | 7.55800371 |
| 9.15962723 | 12.60846602 | 7.58566557 |
| 0.21308943 | 5.11806245  | 7.59679117 |
| 5.42819971 | 5.21079475  | 7.80869071 |
| 1.55602481 | 14.94017738 | 6.51048250 |
| 6.59604501 | 14.92447458 | 6.52531956 |
| 3.38758434 | 4.45439608  | 6.48271512 |
| 7.82882850 | 7.43562034  | 6.50555930 |
| 0.28653699 | 8.91036058  | 5.69075945 |
| 5.31682807 | 8.96373558  | 5.73512107 |
| 4.06628804 | 1.39809795  | 5.70235475 |
| 9.09572113 | 1.44997162  | 5.70087890 |
| 2.79815375 | 11.50868240 | 4.47264330 |
| 7.84523053 | 11.49314361 | 4.47407244 |
| 1.52465380 | 3.98774937  | 4.43049734 |
| 6.57151598 | 3.99751798  | 4.46668492 |
| 0.28578107 | 13.07211575 | 3.95883359 |
| 5.32649363 | 13.07160937 | 3.95501344 |
| 4.06583893 | 5.60701061  | 3.90763191 |
| 9.08339347 | 5.57410052  | 3.94722186 |
| 2.79130912 | 0.63184285  | 2.72906470 |
| 7.82520914 | 0.63184285  | 2.72906470 |
| 1.54535568 | 8.13231278  | 2.72313023 |
| 6.57925558 | 8.13231278  | 2.72313023 |
| 4.06785297 | 9.66406918  | 1.91907406 |
| 9.10175324 | 9.66406918  | 1.91907406 |
| 0.26797625 | 2.17058206  | 1.91625857 |
| 5.30187607 | 2.17058206  | 1.91625857 |
| 1.57854438 | 11.97409725 | 0.84189010 |

|            |             |            |
|------------|-------------|------------|
| 6.61244440 | 11.97409725 | 0.84189010 |
| 2.75741243 | 4.47900724  | 0.83368790 |
| 7.79131222 | 4.47900724  | 0.83368790 |
| 0.81482184 | 14.61165714 | 0.78635430 |
| 5.84872198 | 14.61165714 | 0.78635430 |
| 3.52061224 | 7.11863995  | 0.77661365 |
| 8.55451202 | 7.11863995  | 0.77661365 |
| 1.83548884 | 10.35771410 | 8.52756743 |
| 5.00351278 | 10.94036398 | 7.46067781 |
| 7.57654580 | 11.61407354 | 7.30264903 |
| 6.91318664 | 4.15051829  | 7.30752340 |
| 9.39883209 | 3.42941205  | 7.46430199 |
| 5.08859375 | 14.79900167 | 5.18390774 |
| 8.32643080 | 14.16801362 | 7.01258241 |
| 3.71109359 | 6.01525584  | 7.44980722 |
| 8.63076837 | 5.91003109  | 7.35609130 |
| 4.25092225 | 12.45618729 | 5.49370153 |
| 9.29587415 | 12.43572772 | 5.51863319 |
| 4.29643033 | 8.48997258  | 7.32665423 |
| 9.32330969 | 8.42746202  | 7.28588913 |
| 5.08622168 | 0.96479428  | 7.29746216 |
| 0.03300258 | 14.80191224 | 5.18216917 |
| 1.75689444 | 4.10558902  | 7.35894943 |
| 8.26737516 | 3.18880295  | 5.19329713 |
| 1.75731945 | 9.03139896  | 7.08349840 |
| 6.82481137 | 9.10966615  | 7.11449101 |
| 7.61472178 | 1.58694957  | 7.09249455 |
| 2.55742808 | 1.57429751  | 7.11130161 |
| 2.52784073 | 11.71151324 | 7.27743565 |
| 5.80482525 | 13.39512036 | 7.36178327 |
| 1.06235032 | 6.67045570  | 6.99190769 |
| 6.10200540 | 6.71712266  | 7.01534580 |
| 0.74403065 | 13.43129870 | 7.36247321 |
| 0.02351989 | 10.93496402 | 7.59853196 |
| 0.08890064 | 4.94529303  | 5.50320701 |
| 5.09426345 | 4.95274608  | 5.50827522 |
| 3.58913573 | 10.00077792 | 5.47617901 |
| 8.65961483 | 10.00319682 | 5.50054529 |
| 0.73103704 | 2.49875103  | 5.47983835 |
| 4.51094253 | 3.52933470  | 7.66437927 |
| 1.09464025 | 10.68042228 | 5.20394148 |
| 6.13985981 | 10.68502057 | 5.20465223 |
| 3.22575493 | 3.10476402  | 5.17812961 |
| 5.76818994 | 2.51075175  | 5.49990368 |



|             |             |            |
|-------------|-------------|------------|
| 1.83467484  | 13.10572957 | 5.18710684 |
| 6.88311246  | 13.10119981 | 5.19455205 |
| 7.55820345  | 0.53583305  | 4.88482430 |
| 3.30000794  | 14.19921661 | 6.98330516 |
| 4.31511106  | 7.32887364  | 5.20613963 |
| 9.33685842  | 7.29354882  | 5.17203980 |
| 2.51107717  | 5.57855578  | 5.19039647 |
| 7.52217347  | 5.60879642  | 5.18630412 |
| 1.82817716  | 8.02405737  | 4.87386442 |
| 6.85149378  | 8.04642650  | 4.88809052 |
| 2.51946738  | 0.52984358  | 4.87827823 |
| 0.03612908  | 0.94035609  | 7.29886795 |
| 0.00918142  | 9.04103947  | 3.54266262 |
| 5.04308128  | 9.04103947  | 3.54266262 |
| 4.32987595  | 1.54505515  | 3.54207015 |
| 9.36377621  | 1.54505515  | 3.54207015 |
| 4.34845781  | 11.46142483 | 3.23901367 |
| 9.38235760  | 11.46142483 | 3.23901367 |
| 2.54830408  | 9.76696491  | 3.24620366 |
| 7.58220434  | 9.76696491  | 3.24620366 |
| 1.79143322  | 2.27329993  | 3.24228406 |
| 6.82533312  | 2.27329993  | 3.24228406 |
| 5.02409744  | 3.96758056  | 3.23083019 |
| 10.05799770 | 3.96758056  | 3.23083019 |
| 3.60822964  | 13.88251495 | 3.22705913 |
| 8.64212990  | 13.88251495 | 3.22705913 |
| 0.73003614  | 6.39000845  | 3.22002506 |
| 5.76393604  | 6.39000845  | 3.22002506 |
| 1.07754815  | 14.57939339 | 2.94978833 |
| 6.11144829  | 14.57939339 | 2.94978833 |
| 3.26006389  | 7.08647728  | 2.94436812 |
| 8.29396439  | 7.08647728  | 2.94436812 |
| 1.72237337  | 12.11856842 | 2.92840362 |
| 6.75627327  | 12.11856842 | 2.92840362 |
| 2.61565661  | 4.62633991  | 2.91964269 |
| 7.64955664  | 4.62633991  | 2.91964269 |
| 0.76246345  | 10.40605259 | 1.40558612 |
| 5.79636335  | 10.40605259 | 1.40558612 |
| 3.57397771  | 2.91102600  | 1.39963460 |
| 8.60787773  | 2.91102600  | 1.39963460 |
| 4.28322744  | 0.49661291  | 1.33552134 |
| 9.31712723  | 0.49661291  | 1.33552134 |
| 0.05220732  | 7.99454737  | 1.33009195 |
| 5.08610725  | 7.99454737  | 1.33009195 |

|             |             |            |
|-------------|-------------|------------|
| 5.00888205  | 12.96122646 | 1.13939369 |
| 10.04278183 | 12.96122646 | 1.13939369 |
| 1.77243280  | 1.15037405  | 1.13561857 |
| 6.80633259  | 1.15037405  | 1.13561857 |
| 2.56385946  | 8.64926624  | 1.13208878 |
| 7.59775972  | 8.64926624  | 1.13208878 |
| 4.36085367  | 5.46748734  | 1.12869322 |
| 9.39475346  | 5.46748734  | 1.12869322 |
| 3.25199199  | 11.18562412 | 1.06188464 |
| 8.28589249  | 11.18562412 | 1.06188464 |
| 1.08420253  | 3.69017506  | 1.05508971 |
| 6.11810255  | 3.69017506  | 1.05508971 |
| 2.47195578  | 13.64442635 | 0.97683454 |
| 7.50585556  | 13.64442635 | 0.97683454 |
| 1.86463213  | 6.15024328  | 0.96754396 |
| 6.89853191  | 6.15024328  | 0.96754396 |

# TS for CO dissociation on Fe<sub>3</sub>C(031) with a C<sub>v</sub>

1.000000000000

|             |             |             |
|-------------|-------------|-------------|
| 10.06780000 | 0.00000000  | 0.00000000  |
| 0.00000003  | 14.99310000 | 0.00000000  |
| 0.00000004  | 0.00000004  | 22.23570100 |

|    |   |    |
|----|---|----|
| C  | O | Fe |
| 40 | 1 | 96 |

Cart

|            |             |            |
|------------|-------------|------------|
| 3.27922881 | 9.97064209  | 7.75342061 |
| 8.38875291 | 9.94488438  | 7.66779630 |
| 1.00763401 | 2.45777566  | 7.65579673 |
| 6.04387373 | 2.46245908  | 7.65385713 |
| 4.12422293 | 12.61449171 | 7.55929754 |
| 9.15219003 | 12.58780374 | 7.58771226 |
| 0.23563298 | 5.08216515  | 7.57071025 |
| 5.27395689 | 5.09818475  | 7.56650702 |
| 1.56039467 | 14.91945732 | 6.51029863 |
| 6.59762444 | 14.90751263 | 6.52407559 |
| 2.78244308 | 7.41278946  | 6.50817548 |
| 7.80866537 | 7.39646216  | 6.51501496 |
| 0.27530253 | 8.90010051  | 5.69176252 |
| 5.30399619 | 8.94164950  | 5.73513254 |
| 4.06348351 | 1.43354481  | 5.71054667 |
| 9.09663800 | 1.43947345  | 5.70727525 |
| 2.79566449 | 11.49738238 | 4.47580595 |
| 7.84017011 | 11.48449786 | 4.47650900 |

|            |             |            |
|------------|-------------|------------|
| 1.54182747 | 3.99261692  | 4.46572397 |
| 6.57255366 | 3.99330843  | 4.46643053 |
| 0.28402712 | 13.07139480 | 3.96066743 |
| 5.32284931 | 13.07208866 | 3.95645546 |
| 4.05577590 | 5.58090442  | 3.95291002 |
| 9.08593788 | 5.57345438  | 3.94979850 |
| 2.79130912 | 0.63184285  | 2.72906470 |
| 7.82520914 | 0.63184285  | 2.72906470 |
| 1.54535568 | 8.13231278  | 2.72313023 |
| 6.57925558 | 8.13231278  | 2.72313023 |
| 4.06785297 | 9.66406918  | 1.91907406 |
| 9.10175324 | 9.66406918  | 1.91907406 |
| 0.26797625 | 2.17058206  | 1.91625857 |
| 5.30187607 | 2.17058206  | 1.91625857 |
| 1.57854438 | 11.97409725 | 0.84189010 |
| 6.61244440 | 11.97409725 | 0.84189010 |
| 2.75741243 | 4.47900724  | 0.83368790 |
| 7.79131222 | 4.47900724  | 0.83368790 |
| 0.81482184 | 14.61165714 | 0.78635430 |
| 5.84872198 | 14.61165714 | 0.78635430 |
| 3.52061224 | 7.11863995  | 0.77661365 |
| 8.55451202 | 7.11863995  | 0.77661365 |
| 1.82925632 | 10.33482772 | 8.52373593 |
| 4.98868890 | 10.90853231 | 7.45888155 |
| 7.56989877 | 11.59138839 | 7.30034061 |
| 4.38341069 | 3.42394848  | 7.45246954 |
| 9.41620063 | 3.41384431  | 7.45131091 |
| 0.73848342 | 13.41420887 | 7.36132212 |
| 5.79957485 | 13.37346579 | 7.35908672 |
| 3.59824754 | 5.88736991  | 7.35709392 |
| 8.63095207 | 5.87443851  | 7.36046265 |
| 2.52111657 | 11.68754622 | 7.27203719 |
| 9.29520385 | 12.42435477 | 5.52093578 |
| 4.27094395 | 8.44209598  | 7.32006290 |
| 9.30716957 | 8.39967015  | 7.28572173 |
| 7.60345584 | 1.57700477  | 7.09930599 |
| 2.57059550 | 1.58196647  | 7.09977063 |
| 1.84491280 | 4.10431335  | 7.28414093 |
| 6.87402607 | 4.10946099  | 7.28120242 |
| 1.74185878 | 9.00564144  | 7.08576783 |
| 6.81000987 | 9.07673696  | 7.10952823 |
| 0.04661479 | 0.93323340  | 7.29518968 |
| 5.08707534 | 0.93149933  | 7.29872083 |
| 3.29811082 | 14.17969622 | 6.99375109 |

|             |             |            |
|-------------|-------------|------------|
| 8.32684928  | 14.15515844 | 7.01634542 |
| 1.04937196  | 6.63916956  | 6.98942111 |
| 6.07148858  | 6.67798107  | 7.01049800 |
| 4.24966841  | 12.44358682 | 5.49522956 |
| 0.01120448  | 10.91170424 | 7.60112083 |
| 0.09145862  | 4.93703238  | 5.49145187 |
| 5.12730030  | 4.94877069  | 5.49337395 |
| 3.58144945  | 9.98375051  | 5.47698654 |
| 8.65391154  | 9.99190488  | 5.50126386 |
| 0.74351192  | 2.48511443  | 5.47334007 |
| 5.77548772  | 2.48716378  | 5.47495334 |
| 1.08892109  | 10.67310802 | 5.20647411 |
| 6.13394919  | 10.67161212 | 5.20670101 |
| 3.24696421  | 3.17618917  | 5.19927569 |
| 8.27785961  | 3.17825589  | 5.19773419 |
| 1.83522866  | 13.10078696 | 5.18711455 |
| 6.87993763  | 13.09495341 | 5.19512304 |
| 5.07876153  | 14.79641832 | 5.18390046 |
| 0.03260370  | 14.79333808 | 5.18286294 |
| 4.30338079  | 7.30924649  | 5.19456067 |
| 9.33156487  | 7.28713523  | 5.17502579 |
| 2.50672073  | 5.59770299  | 5.18566959 |
| 7.53240502  | 5.60175712  | 5.19091823 |
| 1.81667603  | 8.01087731  | 4.86877716 |
| 6.84356641  | 8.03085882  | 4.89066356 |
| 7.56001928  | 0.52837278  | 4.88800762 |
| 2.52593550  | 0.53345673  | 4.88267414 |
| 0.00918142  | 9.04103947  | 3.54266262 |
| 5.04308128  | 9.04103947  | 3.54266262 |
| 4.32987595  | 1.54505515  | 3.54207015 |
| 9.36377621  | 1.54505515  | 3.54207015 |
| 4.34845781  | 11.46142483 | 3.23901367 |
| 9.38235760  | 11.46142483 | 3.23901367 |
| 2.54830408  | 9.76696491  | 3.24620366 |
| 7.58220434  | 9.76696491  | 3.24620366 |
| 1.79143322  | 2.27329993  | 3.24228406 |
| 6.82533312  | 2.27329993  | 3.24228406 |
| 5.02409744  | 3.96758056  | 3.23083019 |
| 10.05799770 | 3.96758056  | 3.23083019 |
| 3.60822964  | 13.88251495 | 3.22705913 |
| 8.64212990  | 13.88251495 | 3.22705913 |
| 0.73003614  | 6.39000845  | 3.22002506 |
| 5.76393604  | 6.39000845  | 3.22002506 |
| 1.07754815  | 14.57939339 | 2.94978833 |

|             |             |            |
|-------------|-------------|------------|
| 6.11144829  | 14.57939339 | 2.94978833 |
| 3.26006389  | 7.08647728  | 2.94436812 |
| 8.29396439  | 7.08647728  | 2.94436812 |
| 1.72237337  | 12.11856842 | 2.92840362 |
| 6.75627327  | 12.11856842 | 2.92840362 |
| 2.61565661  | 4.62633991  | 2.91964269 |
| 7.64955664  | 4.62633991  | 2.91964269 |
| 0.76246345  | 10.40605259 | 1.40558612 |
| 5.79636335  | 10.40605259 | 1.40558612 |
| 3.57397771  | 2.91102600  | 1.39963460 |
| 8.60787773  | 2.91102600  | 1.39963460 |
| 4.28322744  | 0.49661291  | 1.33552134 |
| 9.31712723  | 0.49661291  | 1.33552134 |
| 0.05220732  | 7.99454737  | 1.33009195 |
| 5.08610725  | 7.99454737  | 1.33009195 |
| 5.00888205  | 12.96122646 | 1.13939369 |
| 10.04278183 | 12.96122646 | 1.13939369 |
| 1.77243280  | 1.15037405  | 1.13561857 |
| 6.80633259  | 1.15037405  | 1.13561857 |
| 2.56385946  | 8.64926624  | 1.13208878 |
| 7.59775972  | 8.64926624  | 1.13208878 |
| 4.36085367  | 5.46748734  | 1.12869322 |
| 9.39475346  | 5.46748734  | 1.12869322 |
| 3.25199199  | 11.18562412 | 1.06188464 |
| 8.28589249  | 11.18562412 | 1.06188464 |
| 1.08420253  | 3.69017506  | 1.05508971 |
| 6.11810255  | 3.69017506  | 1.05508971 |
| 2.47195578  | 13.64442635 | 0.97683454 |
| 7.50585556  | 13.64442635 | 0.97683454 |
| 1.86463213  | 6.15024328  | 0.96754396 |
| 6.89853191  | 6.15024328  | 0.96754396 |

# TS for CO dissociation on Fe<sub>3</sub>C(102) without a C<sub>v</sub>

1.000000000000

|             |             |             |
|-------------|-------------|-------------|
| 11.01580000 | 0.00000000  | 0.00000000  |
| 0.00000002  | 13.40160000 | 0.00000000  |
| 0.00000004  | 0.00000004  | 22.47150000 |

| C  | O | Fe |
|----|---|----|
| 41 | 1 | 96 |

Cart

|            |             |            |
|------------|-------------|------------|
| 4.24905847 | 5.40069156  | 8.26510359 |
| 1.34490739 | 5.81001942  | 8.40856548 |
| 1.33738216 | 12.60128310 | 8.47344568 |

|             |             |            |
|-------------|-------------|------------|
| 9.32971809  | 4.07977509  | 8.23628818 |
| 9.40850645  | 10.78832066 | 8.27668932 |
| 9.35563930  | 7.66164727  | 8.23477127 |
| 9.36298229  | 0.98711580  | 8.26472338 |
| 4.70826832  | 7.55096796  | 5.95183663 |
| 4.28041442  | 12.62993116 | 8.23270907 |
| 3.31745757  | 9.44119555  | 7.69086249 |
| 3.28873021  | 2.45400908  | 7.62273518 |
| 6.33315947  | 9.41948022  | 6.99358256 |
| 6.30704894  | 2.49383622  | 6.92131016 |
| 7.61904485  | 5.80253487  | 6.87254099 |
| 7.68589712  | 12.54593711 | 6.85373923 |
| 10.70322061 | 5.86487518  | 6.26318311 |
| 10.72149903 | 12.57924546 | 6.26821636 |
| 9.77480003  | 9.18222672  | 5.37653280 |
| 9.76089641  | 2.46462758  | 5.36093451 |
| 3.07409861  | 5.69537645  | 4.76388538 |
| 3.10730960  | 12.50243685 | 4.77571608 |
| 1.76415014  | 9.22609609  | 4.79069545 |
| 1.74703062  | 2.46962757  | 4.79270915 |
| 6.09387875  | 5.81395006  | 4.26611090 |
| 6.09387875  | 12.51475048 | 4.26611090 |
| 5.16361475  | 9.16121387  | 3.32155538 |
| 5.16361475  | 2.46041346  | 3.32155538 |
| 8.21825695  | 9.16481876  | 2.76375627 |
| 8.21825695  | 2.46401906  | 2.76375627 |
| 9.56017304  | 5.83251572  | 2.68237734 |
| 9.56017304  | 12.53331566 | 2.68237734 |
| 1.54647672  | 5.81414414  | 1.97793257 |
| 1.54647672  | 12.51494408 | 1.97793257 |
| 0.58884203  | 9.02470303  | 1.35454476 |
| 0.58884203  | 2.32390261  | 1.35454476 |
| 6.51847029  | 4.25338030  | 1.35242224 |
| 6.51847029  | 10.95418072 | 1.35242224 |
| 6.52053356  | 7.37137270  | 1.35086727 |
| 6.52053356  | 0.67057264  | 1.35086727 |
| 3.50100756  | 9.15109539  | 1.15644598 |
| 3.50100756  | 2.45029497  | 1.15644598 |
| 4.63406237  | 6.91058701  | 9.08537671 |
| 8.75630838  | 5.88166058  | 8.42986240 |
| 9.11368019  | 0.37650418  | 6.15806044 |
| 2.79184537  | 7.00043927  | 8.24338957 |
| 2.71134438  | 0.47235633  | 8.17366005 |
| 2.63349238  | 4.43634211  | 8.13905154 |

|             |             |            |
|-------------|-------------|------------|
| 2.72220892  | 11.36051315 | 8.18895828 |
| 6.12070866  | 5.94259181  | 8.14811286 |
| 6.21718252  | 12.62990680 | 8.18009665 |
| 7.46741313  | 3.79104740  | 7.85640054 |
| 7.55215067  | 10.55668488 | 7.91935283 |
| 7.52860404  | 8.07350201  | 7.84398086 |
| 0.07929382  | 0.40513556  | 7.80505071 |
| 0.10721509  | 7.09620332  | 7.81968220 |
| 1.66941245  | 12.55911521 | 6.15211327 |
| 0.05673239  | 4.61682982  | 7.77997681 |
| 8.83310911  | 12.59660878 | 8.46363570 |
| 4.87271085  | 3.66585936  | 7.56732758 |
| 4.90125851  | 10.64132161 | 7.58416259 |
| 4.90044296  | 8.23170338  | 7.65178469 |
| 4.89339161  | 1.21636176  | 7.53042296 |
| 1.37941367  | 9.23044832  | 7.59009227 |
| 1.30797339  | 2.46730913  | 7.46216078 |
| 9.82237023  | 9.22347179  | 7.34450155 |
| 9.76744050  | 2.52244228  | 7.32003130 |
| 4.22015262  | 5.78223050  | 6.36716401 |
| 4.32971605  | 12.58493969 | 6.30364971 |
| 1.65246903  | 5.83728378  | 6.15417818 |
| 0.11255325  | 11.34686052 | 7.81185067 |
| 9.10504298  | 7.08557920  | 6.16452527 |
| 7.50629931  | 1.28992544  | 7.87470071 |
| 9.10761916  | 4.64556081  | 6.14496418 |
| 9.14609216  | 11.33869411 | 6.15910510 |
| 2.88195751  | 8.05319208  | 5.96510131 |
| 2.95266788  | 1.27293167  | 5.83890175 |
| 2.94696618  | 3.67871796  | 5.82603472 |
| 2.95961357  | 10.46287003 | 5.85422165 |
| 6.52254143  | 6.99585796  | 5.78044249 |
| 6.46846208  | 4.57738621  | 5.79828874 |
| 6.53545031  | 11.32367212 | 5.80944424 |
| 6.52625614  | 0.36260671  | 5.78713144 |
| 7.78583310  | 9.19519743  | 5.54777809 |
| 7.77833896  | 2.49405168  | 5.52332943 |
| 0.34930477  | 7.96044449  | 5.51182430 |
| 0.32373543  | 3.69796085  | 5.48711033 |
| 0.32896517  | 1.24921863  | 5.48220831 |
| 0.34943565  | 10.40288300 | 5.51533322 |
| 5.23140819  | 9.23540958  | 5.28116587 |
| 5.17650314  | 2.46270191  | 5.25726326 |
| 10.69425106 | 5.81395006  | 4.34699440 |

|             |             |            |
|-------------|-------------|------------|
| 10.69425106 | 12.51475048 | 4.34699440 |
| 4.52206469  | 7.03530502  | 4.07911348 |
| 4.52206469  | 4.59259558  | 4.07911348 |
| 4.52206469  | 11.29339504 | 4.07911348 |
| 4.52206469  | 0.33450499  | 4.07911348 |
| 8.06567287  | 5.81395006  | 4.06464910 |
| 8.06567287  | 12.51475048 | 4.06464910 |
| 9.37696266  | 7.94299555  | 3.78912735 |
| 9.37696266  | 3.68490505  | 3.78912735 |
| 9.37696266  | 1.24219537  | 3.78912735 |
| 9.37696266  | 10.38570499 | 3.78912735 |
| 1.91001427  | 7.02113771  | 3.74295783 |
| 1.91001427  | 0.32033783  | 3.74295783 |
| 1.90148330  | 4.59789467  | 3.73080110 |
| 1.90148330  | 11.29869461 | 3.73080110 |
| 6.75760937  | 7.94480467  | 3.43389630 |
| 6.75760937  | 1.24400473  | 3.43389630 |
| 6.75540495  | 3.67919850  | 3.43265676 |
| 6.75540495  | 10.37999821 | 3.43265676 |
| 3.20063019  | 9.15871143  | 3.42493272 |
| 3.20063019  | 2.45791125  | 3.42493272 |
| 0.55113077  | 9.17330837  | 3.25715280 |
| 0.55113077  | 2.47250819  | 3.25715280 |
| 6.07962179  | 5.81109572  | 2.26416254 |
| 6.07962179  | 12.51189613 | 2.26416254 |
| 10.96803188 | 4.59199285  | 2.08241653 |
| 10.96803188 | 11.29279327 | 2.08241653 |
| 3.50234199  | 5.78909206  | 2.07739234 |
| 3.50234199  | 12.48989201 | 2.07739234 |
| 10.98624611 | 7.07002163  | 2.05453277 |
| 10.98624611 | 0.36922148  | 2.05453277 |
| 4.76950121  | 7.92010069  | 1.78491962 |
| 4.76950121  | 1.21930063  | 1.78491962 |
| 4.76405430  | 3.68990970  | 1.78023994 |
| 4.76405430  | 10.39070988 | 1.78023994 |
| 8.38025951  | 4.57472420  | 1.73071468 |
| 8.38025951  | 11.27552414 | 1.73071468 |
| 8.38388634  | 7.07043266  | 1.72176302 |
| 8.38388634  | 0.36963257  | 1.72176302 |
| 9.71496391  | 9.17632866  | 1.45127761 |
| 9.71496391  | 2.47552896  | 1.45127761 |
| 2.15475440  | 7.85452461  | 1.43979466 |
| 2.15475440  | 1.15372443  | 1.43979466 |
| 2.09838200  | 3.69581842  | 1.43469214 |



|            |             |            |
|------------|-------------|------------|
| 2.09838200 | 10.39661884 | 1.43469214 |
| 7.10175276 | 9.16563415  | 1.17035198 |
| 7.10175276 | 2.46483397  | 1.17035198 |

# TS for CO dissociation on Fe<sub>3</sub>C(102) with a C<sub>v</sub>

1.000000000000

|             |             |             |
|-------------|-------------|-------------|
| 11.01580000 | 0.00000000  | 0.00000000  |
| 0.00000002  | 13.40160000 | 0.00000000  |
| 0.00000004  | 0.00000004  | 22.47150000 |

|    |   |    |
|----|---|----|
| C  | O | Fe |
| 40 | 1 | 96 |

Cart

|             |             |            |
|-------------|-------------|------------|
| 4.27244856  | 5.33598732  | 8.23031916 |
| 1.36368801  | 5.78503569  | 8.38505069 |
| 1.34733305  | 12.51741876 | 8.43793690 |
| 9.32822035  | 4.02822486  | 8.23448303 |
| 9.37401677  | 10.72700744 | 8.24272207 |
| 9.35566375  | 7.61116532  | 8.23010171 |
| 9.36458249  | 0.91361843  | 8.25145038 |
| 4.28049435  | 12.52073754 | 8.21502972 |
| 3.32686867  | 9.29988789  | 7.57193048 |
| 3.29556583  | 2.40119076  | 7.61794572 |
| 6.31574358  | 9.23616817  | 6.90582862 |
| 6.30978565  | 2.41413047  | 6.91938502 |
| 7.62224946  | 5.80773948  | 6.8566253  |
| 7.68069724  | 12.50631995 | 6.81190513 |
| 10.70809859 | 5.81987733  | 6.26274064 |
| 10.71800888 | 12.52623551 | 6.26343451 |
| 9.77750183  | 9.16544973  | 5.36696406 |
| 9.76284943  | 2.46090922  | 5.36908338 |
| 3.10692751  | 5.80723472  | 4.80253299 |
| 3.10606087  | 12.50517440 | 4.76632106 |
| 1.76412239  | 9.14653202  | 4.80482393 |
| 1.75227320  | 2.45906744  | 4.79921869 |
| 6.09387875  | 5.81395006  | 4.26611090 |
| 6.09387875  | 12.51475048 | 4.26611090 |
| 5.16361475  | 9.16121387  | 3.32155538 |
| 5.16361475  | 2.46041346  | 3.32155538 |
| 8.21825695  | 9.16481876  | 2.76375627 |
| 8.21825695  | 2.46401906  | 2.76375627 |
| 9.56017304  | 5.83251572  | 2.68237734 |
| 9.56017304  | 12.53331566 | 2.68237734 |
| 1.54647672  | 5.81414414  | 1.97793257 |

|            |             |            |
|------------|-------------|------------|
| 1.54647672 | 12.51494408 | 1.97793257 |
| 0.58884203 | 9.02470303  | 1.35454476 |
| 0.58884203 | 2.32390261  | 1.35454476 |
| 6.51847029 | 4.25338030  | 1.35242224 |
| 6.51847029 | 10.95418072 | 1.35242224 |
| 6.52053356 | 7.37137270  | 1.35086727 |
| 6.52053356 | 0.67057264  | 1.35086727 |
| 3.50100756 | 9.15109539  | 1.15644598 |
| 3.50100756 | 2.45029497  | 1.15644598 |
| 4.63953454 | 6.88742363  | 9.06480390 |
| 8.76386007 | 5.82546579  | 8.42077662 |
| 0.08609460 | 0.34132551  | 7.79786546 |
| 2.79816813 | 7.00929754  | 8.19652421 |
| 2.71892607 | 0.38847399  | 8.15841753 |
| 2.64589063 | 4.40555999  | 8.12658974 |
| 2.72587028 | 11.25967796 | 8.14155998 |
| 6.11947502 | 5.88362325  | 8.13204699 |
| 6.20494568 | 12.53671369 | 8.14160604 |
| 7.46627136 | 3.72775988  | 7.83773705 |
| 7.51521503 | 10.44283437 | 7.86426591 |
| 7.52389740 | 7.97115384  | 7.83139489 |
| 7.50677204 | 1.22424197  | 7.88213774 |
| 0.10775146 | 7.05297789  | 7.81005750 |
| 0.33176901 | 1.23988289  | 5.48338987 |
| 0.06516704 | 4.57577472  | 7.78934651 |
| 0.10461094 | 11.27615053 | 7.79689287 |
| 4.88043616 | 3.60805225  | 7.52986462 |
| 4.90426683 | 10.51639581 | 7.51585639 |
| 4.90978859 | 8.06913110  | 7.57761504 |
| 4.89067896 | 1.15449055  | 7.53198134 |
| 1.38371387 | 9.15281074  | 7.50080237 |
| 1.32138690 | 2.41782092  | 7.47298379 |
| 9.81534543 | 9.16680203  | 7.32756761 |
| 9.77770382 | 2.46904115  | 7.33125971 |
| 4.29810298 | 5.81850627  | 6.37465318 |
| 4.32159473 | 12.52955591 | 6.29615811 |
| 1.65888927 | 5.81143629  | 6.16537851 |
| 1.66758037 | 12.51912009 | 6.14463989 |
| 9.10969189 | 7.03352533  | 6.15235491 |
| 8.80405947 | 12.52061723 | 8.42619943 |
| 9.10823462 | 4.60035589  | 6.14942523 |
| 9.13835516 | 11.29346395 | 6.14777449 |
| 2.98027900 | 7.94083425  | 5.87075115 |
| 2.95907064 | 1.25032816  | 5.84198580 |

|             |             |            |
|-------------|-------------|------------|
| 2.95460861  | 3.67666683  | 5.81925563 |
| 2.95631100  | 10.39214336 | 5.82467919 |
| 6.47400151  | 7.04062870  | 5.79881189 |
| 6.48090586  | 4.59438268  | 5.79091111 |
| 6.52081730  | 11.28834340 | 5.78079723 |
| 6.51822080  | 0.34273101  | 5.78954079 |
| 7.79066300  | 9.16846163  | 5.51188150 |
| 7.78007438  | 2.46993458  | 5.52439134 |
| 0.34035979  | 7.93532894  | 5.49803388 |
| 0.33008226  | 3.68813954  | 5.49536411 |
| 9.12072951  | 0.33862370  | 6.15309827 |
| 0.35294630  | 10.38347626 | 5.49593398 |
| 5.18631074  | 9.16811105  | 5.25578966 |
| 5.18643630  | 2.45978810  | 5.25308315 |
| 10.69425106 | 5.81395006  | 4.34699440 |
| 10.69425106 | 12.51475048 | 4.34699440 |
| 4.52206469  | 7.03530502  | 4.07911348 |
| 4.52206469  | 4.59259558  | 4.07911348 |
| 4.52206469  | 11.29339504 | 4.07911348 |
| 4.52206469  | 0.33450499  | 4.07911348 |
| 8.06567287  | 5.81395006  | 4.06464910 |
| 8.06567287  | 12.51475048 | 4.06464910 |
| 9.37696266  | 7.94299555  | 3.78912735 |
| 9.37696266  | 3.68490505  | 3.78912735 |
| 9.37696266  | 1.24219537  | 3.78912735 |
| 9.37696266  | 10.38570499 | 3.78912735 |
| 1.91001427  | 7.02113771  | 3.74295783 |
| 1.91001427  | 0.32033783  | 3.74295783 |
| 1.90148330  | 4.59789467  | 3.73080110 |
| 1.90148330  | 11.29869461 | 3.73080110 |
| 6.75760937  | 7.94480467  | 3.43389630 |
| 6.75760937  | 1.24400473  | 3.43389630 |
| 6.75540495  | 3.67919850  | 3.43265676 |
| 6.75540495  | 10.37999821 | 3.43265676 |
| 3.20063019  | 9.15871143  | 3.42493272 |
| 3.20063019  | 2.45791125  | 3.42493272 |
| 0.55113077  | 9.17330837  | 3.25715280 |
| 0.55113077  | 2.47250819  | 3.25715280 |
| 6.07962179  | 5.81109572  | 2.26416254 |
| 6.07962179  | 12.51189613 | 2.26416254 |
| 10.96803188 | 4.59199285  | 2.08241653 |
| 10.96803188 | 11.29279327 | 2.08241653 |
| 3.50234199  | 5.78909206  | 2.07739234 |
| 3.50234199  | 12.48989201 | 2.07739234 |

|             |             |            |
|-------------|-------------|------------|
| 10.98624611 | 7.07002163  | 2.05453277 |
| 10.98624611 | 0.36922148  | 2.05453277 |
| 4.76950121  | 7.92010069  | 1.78491962 |
| 4.76950121  | 1.21930063  | 1.78491962 |
| 4.76405430  | 3.68990970  | 1.78023994 |
| 4.76405430  | 10.39070988 | 1.78023994 |
| 8.38025951  | 4.57472420  | 1.73071468 |
| 8.38025951  | 11.27552414 | 1.73071468 |
| 8.38388634  | 7.07043266  | 1.72176302 |
| 8.38388634  | 0.36963257  | 1.72176302 |
| 9.71496391  | 9.17632866  | 1.45127761 |
| 9.71496391  | 2.47552896  | 1.45127761 |
| 2.15475440  | 7.85452461  | 1.43979466 |
| 2.15475440  | 1.15372443  | 1.43979466 |
| 2.09838200  | 3.69581842  | 1.43469214 |
| 2.09838200  | 10.39661884 | 1.43469214 |
| 7.10175276  | 9.16563415  | 1.17035198 |
| 7.10175276  | 2.46483397  | 1.17035198 |

# TS for CO dissociation on Fe<sub>3</sub>C(131) without a C<sub>v</sub>

1.000000000000

|             |             |             |
|-------------|-------------|-------------|
| 12.25530000 | 0.00000000  | 0.00000000  |
| -2.38850589 | 13.25166596 | 0.00000000  |
| 0.00000004  | 0.00000005  | 21.25600100 |
| C           | O           | Fe          |
| 45          | 1           | 96          |

Cart

|             |             |            |
|-------------|-------------|------------|
| 2.25283085  | 6.50809331  | 6.74770278 |
| 3.38202521  | 3.84914996  | 8.00249531 |
| 1.43438635  | 12.32104235 | 7.89109136 |
| 10.25440587 | 1.66290386  | 7.52327762 |
| 9.04593900  | 8.30289213  | 7.50996332 |
| 9.72370532  | 5.09947995  | 7.44062741 |
| 8.46354309  | 10.43240961 | 4.76127381 |
| 6.33330259  | 5.97558209  | 7.24987213 |
| 5.07495947  | 12.65917475 | 7.27596811 |
| 7.58138349  | 2.35122788  | 7.06159644 |
| 6.35172144  | 8.97777428  | 7.05118458 |
| 0.41347613  | 4.27249179  | 6.86819464 |
| -0.71102036 | 10.96862145 | 6.61299395 |
| 0.81800889  | 1.20388502  | 6.77373780 |
| -0.45037969 | 7.90733040  | 6.57624985 |
| 4.47608110  | 4.59137434  | 5.36231622 |

|             |             |            |
|-------------|-------------|------------|
| 3.13651228  | 11.06057860 | 5.71598200 |
| 4.69873365  | 1.49117113  | 5.32010716 |
| 3.56616281  | 8.14045706  | 5.17415664 |
| 10.70168174 | 0.20499279  | 4.99871701 |
| 9.48005095  | 6.83669201  | 4.98458038 |
| 9.68289661  | 3.78831825  | 4.75189750 |
| 8.51207505  | 11.69939214 | 7.44426573 |
| 2.31291199  | 0.37301424  | 3.71090221 |
| 1.11865902  | 6.99884701  | 3.71090221 |
| 1.32024336  | 3.98045111  | 3.48570275 |
| 0.12599038  | 10.60628414 | 3.48570275 |
| 7.25680780  | 2.63475370  | 3.27525186 |
| 6.06255484  | 9.26058674  | 3.27525186 |
| 6.27615499  | 6.19979715  | 3.10429907 |
| 5.08190203  | 12.82563019 | 3.10429907 |
| 11.15591240 | 2.80662537  | 1.85426259 |
| 9.96165943  | 9.43245792  | 1.85426259 |
| 10.26668167 | 6.36503696  | 1.84332585 |
| 9.07242870  | 12.99086952 | 1.84332585 |
| 4.11546373  | 4.99648762  | 1.50322902 |
| 2.92121053  | 11.62232018 | 1.50322902 |
| 4.31588459  | 1.85071790  | 1.48528659 |
| 3.12163162  | 8.47655106  | 1.48528659 |
| 1.00381875  | 5.67873001  | 1.17111504 |
| -0.19043419 | 12.30456257 | 1.17111504 |
| 1.64606690  | 2.42555165  | 1.06123793 |
| 0.45181391  | 9.05138493  | 1.06123793 |
| 8.50366020  | 0.27873534  | 0.54604721 |
| 7.30940676  | 6.90456820  | 0.54604721 |
| 3.42620038  | 7.74615123  | 7.78968714 |
| 1.17579659  | 10.89563510 | 6.78459682 |
| 4.11124432  | 0.78101335  | 7.41242021 |
| 2.18958085  | 2.33703468  | 7.72482612 |
| -0.23638911 | 11.96324191 | 4.83043729 |
| 2.65636700  | 1.24348550  | 5.49876013 |
| 3.07182163  | 9.30288621  | 6.82760815 |
| 4.51576107  | 5.32504096  | 7.33029128 |
| 8.03920303  | 5.56808579  | 8.12400030 |
| 9.20686050  | 3.24142366  | 7.39543808 |
| 7.98716556  | 9.86151572  | 7.38663898 |
| 0.35054553  | 6.25044273  | 7.07403374 |
| -0.41472095 | 9.50278392  | 5.40512272 |
| 10.50777384 | 2.12852659  | 5.41033722 |
| 10.05459289 | 6.87449068  | 6.89374520 |

|             |             |            |
|-------------|-------------|------------|
| 6.60449744  | 3.93481270  | 6.96145393 |
| 6.81565804  | 12.18473928 | 8.11355953 |
| 2.22076086  | 4.63312016  | 6.83155006 |
| 3.28048625  | 12.04290961 | 7.34037762 |
| 8.68818466  | 0.83960102  | 6.76696071 |
| 7.45256507  | 7.47714082  | 6.76590899 |
| 4.23682604  | 3.02744843  | 6.56968460 |
| 5.36766080  | 10.56916826 | 6.97665278 |
| 6.26655017  | 1.16111923  | 6.47217521 |
| 4.95793774  | 7.76892895  | 6.59212977 |
| -0.38377617 | 2.59168248  | 7.50633021 |
| 9.77985038  | 11.24806429 | 6.05493269 |
| 8.50382188  | 5.18667625  | 5.75202930 |
| 7.31017514  | 11.81292778 | 5.75646216 |
| 11.29249132 | 0.22744910  | 6.93702062 |
| -0.46618883 | 12.82689647 | 7.21570988 |
| 0.81201006  | 2.92853789  | 5.48347689 |
| 1.48876449  | 7.82524768  | 5.56518967 |
| 10.97284760 | 4.58652354  | 6.07181837 |
| 9.27611826  | 8.76797333  | 5.40016912 |
| 6.02529150  | 5.73826259  | 5.33305752 |
| 4.79742107  | 12.30311333 | 5.34992782 |
| 8.02264151  | 2.73760085  | 5.15177892 |
| 6.78909903  | 9.37523092  | 5.15610465 |
| 3.36809667  | 6.18015602  | 5.19037566 |
| 2.18529180  | 12.74980784 | 5.12587035 |
| 0.39801416  | 0.45980230  | 4.94091932 |
| -0.82740876 | 7.05898510  | 4.87254228 |
| 0.94873401  | 5.36061163  | 4.79695796 |
| -1.57849156 | 9.28048710  | 7.42199830 |
| 5.61464835  | 3.16100700  | 4.62178848 |
| 4.34213973  | 9.84169225  | 4.71047274 |
| 2.97331079  | 3.66679784  | 4.44797140 |
| 1.81638501  | 10.26121003 | 4.42124790 |
| 8.91923550  | 0.46496729  | 4.15201493 |
| 7.72590621  | 7.10952912  | 4.12777664 |
| 6.35152880  | 0.95552196  | 3.95820542 |
| 5.16760858  | 7.62272408  | 3.95749693 |
| 9.76671028  | 5.40936232  | 3.71097636 |
| 8.57245731  | 12.03519535 | 3.71097636 |
| -0.65484261 | 3.68870687  | 3.62123847 |
| -1.84909558 | 10.31453991 | 3.62123847 |
| 7.30014229  | 4.57573605  | 3.45908976 |
| 6.10588932  | 11.20156860 | 3.45908976 |

|             |             |            |
|-------------|-------------|------------|
| 3.94268513  | 1.50069594  | 3.44737101 |
| 2.74843216  | 8.12652874  | 3.44737101 |
| 4.69885063  | 5.05109930  | 3.28788567 |
| 3.50459790  | 11.67693234 | 3.28788567 |
| 1.40509236  | 2.01450324  | 3.18216968 |
| 0.21083943  | 8.64033604  | 3.18216968 |
| 9.28441429  | 2.89875793  | 3.07764530 |
| 8.09016132  | 9.52459049  | 3.07764530 |
| 11.10470676 | 1.19581735  | 3.08856487 |
| 9.91045380  | 7.82165051  | 3.08856487 |
| 2.27633667  | 5.56089735  | 2.69547486 |
| 1.08208370  | 12.18673039 | 2.69547486 |
| -0.23673894 | 6.12739277  | 2.55241013 |
| -1.43099189 | 12.75322628 | 2.55241013 |
| 5.68936014  | 2.97972059  | 2.12121320 |
| 4.49510717  | 9.60555363  | 2.12121320 |
| 7.63962316  | 1.24280357  | 1.88798439 |
| 6.44537020  | 7.86863661  | 1.88798439 |
| 3.21764994  | 3.35256600  | 1.74998808 |
| 2.02339697  | 9.97839928  | 1.74998808 |
| 8.41606617  | 6.08661365  | 1.74018729 |
| 7.22181320  | 12.71244621 | 1.74018729 |
| 5.30755520  | 0.30048525  | 1.67762649 |
| 4.11330223  | 6.92631817  | 1.67762649 |
| 0.66523141  | 3.91109681  | 1.60902893 |
| -0.52902150 | 10.53693008 | 1.60902893 |
| 10.31909657 | 4.46215439  | 1.41221321 |
| 9.12484360  | 11.08798695 | 1.41221321 |
| 2.69262552  | 0.87311536  | 1.25545239 |
| 1.49837267  | 7.49894810  | 1.25545239 |
| 6.08439112  | 5.48753309  | 1.23569620 |
| 4.89013815  | 12.11336613 | 1.23569620 |
| 7.91476154  | 3.69234300  | 1.22194362 |
| 6.72050858  | 10.31817627 | 1.22194362 |
| 0.06142718  | 1.44478715  | 1.08450759 |
| -1.13282573 | 8.07062054  | 1.08450759 |
| 9.73022079  | 1.78445995  | 0.82899422 |
| 8.53596783  | 8.41029263  | 0.82899422 |

# TS for CO dissociation on Fe<sub>3</sub>C(131) with a C<sub>v</sub>

1.000000000000

|             |             |            |
|-------------|-------------|------------|
| 12.25530000 | 0.00000000  | 0.00000000 |
| -2.38850589 | 13.25166596 | 0.00000000 |

|      | 0.00000004  | 0.00000005  | 21.25600100 |
|------|-------------|-------------|-------------|
|      | C           | O           | Fe          |
|      | 44          | 1           | 96          |
| Cart |             |             |             |
|      | 3.30232401  | 3.63360673  | 8.08234714  |
|      | 2.18900547  | 10.44043019 | 7.99906056  |
|      | 10.27076452 | 1.73588523  | 7.50520496  |
|      | 9.06845427  | 8.36387241  | 7.49681823  |
|      | 9.72571508  | 5.11745239  | 7.38667369  |
|      | 8.45291684  | 11.75227168 | 7.37093845  |
|      | 6.68737324  | 5.75610284  | 7.00368406  |
|      | 4.97841494  | 12.72569391 | 7.16983544  |
|      | 7.61068017  | 2.32517270  | 7.08919535  |
|      | 6.38767035  | 8.97713239  | 7.09842907  |
|      | 0.43142129  | 4.41657579  | 6.65662650  |
|      | -0.77941744 | 11.02438128 | 6.70957637  |
|      | 0.72618558  | 1.32500443  | 6.69274103  |
|      | -0.44295778 | 7.96973092  | 6.70760907  |
|      | 4.46260435  | 4.54054705  | 5.43567422  |
|      | 3.24262503  | 11.16097529 | 5.44312022  |
|      | 4.71075066  | 1.46637873  | 5.31361208  |
|      | 3.48664437  | 8.11346235  | 5.24460429  |
|      | 10.67522004 | 0.21929935  | 4.99526850  |
|      | 9.48490856  | 6.83678459  | 5.00914460  |
|      | 9.62365181  | 3.80594359  | 4.76131182  |
|      | 8.45036284  | 10.42619934 | 4.75823510  |
|      | 2.31291199  | 0.37301424  | 3.71090221  |
|      | 1.11865902  | 6.99884701  | 3.71090221  |
|      | 1.32024336  | 3.98045111  | 3.48570275  |
|      | 0.12599038  | 10.60628414 | 3.48570275  |
|      | 7.25680780  | 2.63475370  | 3.27525186  |
|      | 6.06255484  | 9.26058674  | 3.27525186  |
|      | 6.27615499  | 6.19979715  | 3.10429907  |
|      | 5.08190203  | 12.82563019 | 3.10429907  |
|      | 11.15591240 | 2.80662537  | 1.85426259  |
|      | 9.96165943  | 9.43245792  | 1.85426259  |
|      | 10.26668167 | 6.36503696  | 1.84332585  |
|      | 9.07242870  | 12.99086952 | 1.84332585  |
|      | 4.11546373  | 4.99648762  | 1.50322902  |
|      | 2.92121053  | 11.62232018 | 1.50322902  |
|      | 4.31588459  | 1.85071790  | 1.48528659  |
|      | 3.12163162  | 8.47655106  | 1.48528659  |
|      | 1.00381875  | 5.67873001  | 1.17111504  |
|      | -0.19043419 | 12.30456257 | 1.17111504  |



|             |             |            |
|-------------|-------------|------------|
| 1.64606690  | 2.42555165  | 1.06123793 |
| 0.45181391  | 9.05138493  | 1.06123793 |
| 8.50366020  | 0.27873534  | 0.54604721 |
| 7.30940676  | 6.90456820  | 0.54604721 |
| 3.28327843  | 5.40027760  | 8.48167394 |
| 2.14159564  | 2.20368553  | 7.76084113 |
| 1.01243043  | 8.93005884  | 7.73683971 |
| -0.40309066 | 2.71425365  | 7.45884667 |
| -1.59085406 | 9.32413079  | 7.48147363 |
| 3.97405037  | 0.42547229  | 7.33382337 |
| 2.76280744  | 7.03341135  | 7.48845111 |
| 4.75839893  | 5.37733474  | 7.27319723 |
| 3.33804255  | 11.85022171 | 7.28557001 |
| 9.22823851  | 3.29500315  | 7.35307109 |
| 8.01611136  | 9.92319281  | 7.35539128 |
| 0.37417640  | 6.30306761  | 7.12445488 |
| -0.81964244 | 12.91824589 | 7.13186377 |
| 11.22668185 | 0.25196955  | 6.90920365 |
| 10.05790655 | 6.88262018  | 6.92175085 |
| 6.60944037  | 3.83915614  | 6.85673752 |
| 5.44107721  | 10.59384657 | 6.93160952 |
| 2.26324003  | 4.61935709  | 6.87246360 |
| 1.05831900  | 11.25761712 | 6.80755227 |
| 8.67922372  | 0.78969282  | 6.86157063 |
| 7.48374148  | 7.45841222  | 6.82240789 |
| 4.27488118  | 2.94281901  | 6.67680768 |
| 3.07548196  | 9.47905215  | 6.64041670 |
| 6.25369885  | 1.10939661  | 6.53615138 |
| 5.02046648  | 7.84520423  | 6.44418616 |
| 10.93231481 | 4.65429431  | 5.98826757 |
| 9.74833984  | 11.26745481 | 6.01824888 |
| 8.43303213  | 5.24443565  | 5.88036285 |
| 7.30168814  | 11.82489440 | 5.78563168 |
| 0.82597055  | 2.95051321  | 5.45881899 |
| -0.37150161 | 9.57721365  | 5.47144619 |
| 2.65042543  | 1.26047045  | 5.49150234 |
| 1.46599730  | 7.86902973  | 5.50545101 |
| 10.48927428 | 2.15386616  | 5.38895189 |
| 9.30093552  | 8.78117494  | 5.39883923 |
| 6.00974053  | 5.72412720  | 5.23670350 |
| 4.82392616  | 12.31423784 | 5.30605519 |
| 8.01532246  | 2.70305290  | 5.15881410 |
| 6.81036309  | 9.33647804  | 5.16468605 |
| 3.36846440  | 6.14474005  | 5.15587531 |

|             |             |            |
|-------------|-------------|------------|
| 2.16548794  | 12.76297758 | 5.11458635 |
| 0.36478226  | 0.47764159  | 4.91541949 |
| -0.82549876 | 7.10992667  | 4.91408367 |
| 0.95155161  | 5.36333189  | 4.82013892 |
| -0.26005074 | 11.98907497 | 4.81377718 |
| 5.58247610  | 3.14092948  | 4.63189716 |
| 4.39438176  | 9.79837893  | 4.63509600 |
| 2.98919574  | 3.66246446  | 4.44322700 |
| 1.79542374  | 10.27776058 | 4.42171378 |
| 8.92368164  | 0.47764384  | 4.14143339 |
| 7.74446458  | 7.11389095  | 4.12431324 |
| 6.35539339  | 0.96013587  | 3.96644092 |
| 5.15323623  | 7.60557206  | 3.93955174 |
| 9.76671028  | 5.40936232  | 3.71097636 |
| 8.57245731  | 12.03519535 | 3.71097636 |
| -0.65484261 | 3.68870687  | 3.62123847 |
| -1.84909558 | 10.31453991 | 3.62123847 |
| 7.30014229  | 4.57573605  | 3.45908976 |
| 6.10588932  | 11.20156860 | 3.45908976 |
| 3.94268513  | 1.50069594  | 3.44737101 |
| 2.74843216  | 8.12652874  | 3.44737101 |
| 4.69885063  | 5.05109930  | 3.28788567 |
| 3.50459790  | 11.67693234 | 3.28788567 |
| 1.40509236  | 2.01450324  | 3.18216968 |
| 0.21083943  | 8.64033604  | 3.18216968 |
| 9.28441429  | 2.89875793  | 3.07764530 |
| 8.09016132  | 9.52459049  | 3.07764530 |
| 11.10470676 | 1.19581735  | 3.08856487 |
| 9.91045380  | 7.82165051  | 3.08856487 |
| 2.27633667  | 5.56089735  | 2.69547486 |
| 1.08208370  | 12.18673039 | 2.69547486 |
| -0.23673894 | 6.12739277  | 2.55241013 |
| -1.43099189 | 12.75322628 | 2.55241013 |
| 5.68936014  | 2.97972059  | 2.12121320 |
| 4.49510717  | 9.60555363  | 2.12121320 |
| 7.63962316  | 1.24280357  | 1.88798439 |
| 6.44537020  | 7.86863661  | 1.88798439 |
| 3.21764994  | 3.35256600  | 1.74998808 |
| 2.02339697  | 9.97839928  | 1.74998808 |
| 8.41606617  | 6.08661365  | 1.74018729 |
| 7.22181320  | 12.71244621 | 1.74018729 |
| 5.30755520  | 0.30048525  | 1.67762649 |
| 4.11330223  | 6.92631817  | 1.67762649 |
| 0.66523141  | 3.91109681  | 1.60902893 |

|             |             |            |
|-------------|-------------|------------|
| -0.52902150 | 10.53693008 | 1.60902893 |
| 10.31909657 | 4.46215439  | 1.41221321 |
| 9.12484360  | 11.08798695 | 1.41221321 |
| 2.69262552  | 0.87311536  | 1.25545239 |
| 1.49837267  | 7.49894810  | 1.25545239 |
| 6.08439112  | 5.48753309  | 1.23569620 |
| 4.89013815  | 12.11336613 | 1.23569620 |
| 7.91476154  | 3.69234300  | 1.22194362 |
| 6.72050858  | 10.31817627 | 1.22194362 |
| 0.06142718  | 1.44478715  | 1.08450759 |
| -1.13282573 | 8.07062054  | 1.08450759 |
| 9.73022079  | 1.78445995  | 0.82899422 |
| 8.53596783  | 8.41029263  | 0.82899422 |

# TS for CO dissociation on Fe<sub>5</sub>C<sub>2</sub>(510) step without a Cv

1.000000000000

|             |             |             |
|-------------|-------------|-------------|
| 9.97980022  | 0.00000000  | 0.00000000  |
| -0.76395801 | 12.66177369 | 0.00000000  |
| 0.00000004  | 0.00000004  | 19.64039993 |

|    |   |    |
|----|---|----|
| C  | O | Fe |
| 37 | 1 | 77 |

Cart

|             |             |            |
|-------------|-------------|------------|
| 7.98500981  | 0.24311057  | 6.50403060 |
| 4.16108332  | 3.09734108  | 5.21220520 |
| 5.44920097  | 9.32178136  | 7.51579372 |
| 1.92923198  | 1.27531672  | 6.26532453 |
| 4.81729353  | 6.24790580  | 6.01287849 |
| 2.81200966  | 6.93744617  | 7.44188576 |
| 7.87675246  | 6.87224723  | 7.13408705 |
| 4.69461734  | 10.64657533 | 4.16023984 |
| 7.19952985  | 12.34307220 | 3.64282859 |
| 2.15195274  | 4.20623431  | 7.16341879 |
| 7.66991977  | 10.04777252 | 6.10300379 |
| 2.57785477  | 10.09189240 | 6.11234606 |
| 0.39259000  | 8.80563456  | 5.95543876 |
| 9.15914801  | 3.11784614  | 5.21483155 |
| 4.65981955  | 1.89373950  | 7.58882159 |
| -0.31678094 | 10.89276153 | 4.25144680 |
| 4.21869124  | 7.23803489  | 3.38804628 |
| 6.72914204  | 5.59803959  | 4.00612288 |
| 1.70825732  | 5.68505978  | 4.02180814 |
| 2.22496053  | 12.34875417 | 3.66518450 |
| 4.54135191  | 11.97933704 | 6.64272822 |

|             |             |            |
|-------------|-------------|------------|
| 7.19774284  | 4.13219427  | 7.17679536 |
| 9.21181863  | 7.19559625  | 3.41261540 |
| 5.47292232  | 2.23055553  | 2.34193015 |
| 0.48302215  | 2.23055553  | 2.34193015 |
| 6.73540354  | 9.72874641  | 2.00704742 |
| 1.74550355  | 9.72874641  | 2.00704742 |
| 7.98876715  | 3.77819967  | 1.47019899 |
| 2.99886727  | 3.77819967  | 1.47019899 |
| 9.21347809  | 11.29064846 | 1.28800344 |
| 4.22357798  | 11.29064846 | 1.28800344 |
| 5.52626467  | 6.13002825  | 0.45987183 |
| 0.53636485  | 6.13002825  | 0.45987183 |
| 7.45328903  | 1.12937152  | 0.40848067 |
| 2.46338916  | 1.12937152  | 0.40848067 |
| 4.75647831  | 8.73880577  | 0.18583304 |
| -0.23342146 | 8.73880577  | 0.18583304 |
| 8.81405025  | 1.08134787  | 8.03343483 |
| 3.96554752  | 10.35110526 | 7.27206126 |
| 0.12183735  | 0.87953082  | 6.72116092 |
| -0.41264127 | 7.54609581  | 6.99088311 |
| 8.11750728  | 6.68355266  | 5.03992099 |
| 6.30525834  | 11.05170753 | 6.92323747 |
| 3.72969807  | 5.26215029  | 7.19814535 |
| 5.78831364  | 2.18624568  | 4.52942417 |
| 4.48768762  | 7.77747438  | 7.05910129 |
| 8.20194953  | 1.41992433  | 4.94941046 |
| 3.14288046  | 2.68947033  | 6.86020128 |
| 0.00798523  | 4.86903216  | 4.72649218 |
| 6.41715714  | 5.80131999  | 6.86374612 |
| 5.57663358  | 3.30460729  | 6.75691838 |
| 6.92515519  | 8.46809133  | 6.71951303 |
| 0.77850979  | 2.14380434  | 4.52342540 |
| 2.06062532  | 8.37380364  | 6.61878015 |
| 0.74207378  | 12.37906292 | 4.98398824 |
| 5.64352339  | 12.31723348 | 4.87799654 |
| 6.21566412  | 0.92428697  | 6.89791682 |
| 7.47538542  | 4.11600054  | 5.11844021 |
| 2.50047167  | 4.22376992  | 5.06681562 |
| 0.69867638  | 7.30119912  | 4.71363428 |
| 5.72423749  | 7.32356347  | 4.71871897 |
| 6.40621696  | 9.77194343  | 4.59436856 |
| 8.24659145  | 2.59093839  | 7.06225327 |
| 3.26611826  | 11.55105518 | 5.18548326 |
| 1.31255242  | 9.88274165  | 4.71163002 |

|             |             |            |
|-------------|-------------|------------|
| 0.61632354  | 3.31069032  | 6.63484577 |
| 3.72704354  | 0.37236651  | 7.06097859 |
| 1.32074495  | 5.87346490  | 6.85717857 |
| 3.16370159  | 6.69116816  | 5.02623050 |
| 8.87080629  | 9.21705599  | 4.95684184 |
| 5.01202266  | 4.81523471  | 4.74992697 |
| 8.83079033  | 5.15190000  | 7.01286888 |
| 3.84782344  | 9.09093253  | 4.91533702 |
| 8.16720172  | 11.67757896 | 5.30238950 |
| 3.25349971  | 1.41393197  | 4.81086906 |
| 8.92724419  | 3.16928101  | 3.13275409 |
| 3.93734455  | 3.16928101  | 3.13275409 |
| 9.65447807  | 0.51179242  | 2.92767382 |
| 4.66457796  | 0.51179242  | 2.92767382 |
| 8.19081593  | 10.75315189 | 2.92137337 |
| 3.20091629  | 10.75315189 | 2.92137337 |
| 7.52427816  | 8.16568470  | 2.89047265 |
| 2.53437829  | 8.16568470  | 2.89047265 |
| 6.46140337  | 3.88992119  | 2.81003308 |
| 1.47150326  | 3.88992119  | 2.81003308 |
| 8.23615360  | 5.59719324  | 2.75910425 |
| 3.24625349  | 5.59719324  | 2.75910425 |
| 5.72548342  | 11.29866314 | 2.69921899 |
| 0.73558354  | 11.29866314 | 2.69921899 |
| 5.02271366  | 8.84247589  | 2.64073300 |
| 0.03281343  | 8.84247589  | 2.64073300 |
| 7.16234589  | 1.15467191  | 2.58495903 |
| 2.17244577  | 1.15467191  | 2.58495903 |
| 5.69094276  | 6.28061676  | 2.47308970 |
| 0.70104283  | 6.28061676  | 2.47308970 |
| 4.72644854  | 4.52631235  | 0.98044425 |
| -0.26345146 | 4.52631235  | 0.98044425 |
| 8.98416233  | 2.08401227  | 0.94984233 |
| 3.99426270  | 2.08401227  | 0.94984233 |
| 7.49692297  | 12.16127491 | 0.88189071 |
| 2.50702286  | 12.16127491 | 0.88189071 |
| 8.92881203  | 7.14167833  | 0.77916235 |
| 3.93891239  | 7.14167833  | 0.77916235 |
| 8.23179626  | 9.65808487  | 0.74752367 |
| 3.24189639  | 9.65808487  | 0.74752367 |
| 6.50168800  | 2.71004343  | 0.73384589 |
| 1.51178777  | 2.71004343  | 0.73384589 |
| 5.78449345  | 0.24636792  | 0.66762453 |
| 0.79459333  | 0.24636792  | 0.66762453 |

|            |             |            |
|------------|-------------|------------|
| 6.40908241 | 7.83185196  | 0.60482943 |
| 1.41918242 | 7.83185196  | 0.60482943 |
| 7.18588972 | 5.31081581  | 0.60368013 |
| 2.19598985 | 5.31081581  | 0.60368013 |
| 5.68450737 | 10.28863907 | 0.50651002 |
| 0.69460732 | 10.28863907 | 0.50651002 |

# TS for CO dissociation on Fe<sub>5</sub>C<sub>2</sub>(510) step with a Cv

1.000000000000

|             |             |             |
|-------------|-------------|-------------|
| 9.97980022  | 0.00000000  | 0.00000000  |
| -0.76395801 | 12.66177369 | 0.00000000  |
| 0.00000004  | 0.00000004  | 19.64039993 |

|    |   |    |
|----|---|----|
| C  | O | Fe |
| 36 | 1 | 77 |

Cart

|             |             |            |
|-------------|-------------|------------|
| 2.48635936  | 10.25799228 | 6.23266095 |
| 4.67975845  | 1.84157453  | 7.58996655 |
| 5.48808262  | 9.34201311  | 7.47815593 |
| 7.18424392  | 4.13430745  | 7.13717024 |
| 2.20364204  | 4.17389035  | 7.17067272 |
| 2.98206342  | 6.84779849  | 7.09626547 |
| 7.88359853  | 6.84044420  | 7.07985898 |
| 4.63290537  | 11.98693637 | 6.57163815 |
| 1.84157245  | 1.37536127  | 6.22342712 |
| 7.69004354  | 10.07632318 | 6.09641836 |
| 8.10012162  | 0.44285547  | 6.61999343 |
| 0.41389007  | 8.79068544  | 5.95921619 |
| 4.17354090  | 3.11097189  | 5.23461128 |
| 9.17481130  | 3.12323118  | 5.23118191 |
| -0.32192491 | 10.89610380 | 4.25065617 |
| 4.70569158  | 10.64608662 | 4.16562862 |
| 6.70808815  | 5.65445731  | 4.04104957 |
| 1.71696352  | 5.67997494  | 4.02669849 |
| 2.22648122  | 12.34779982 | 3.67810211 |
| 7.20231671  | 12.34089014 | 3.63364955 |
| 4.22848771  | 7.22140868  | 3.46996472 |
| 9.21694650  | 7.20195949  | 3.41083034 |
| 5.47292232  | 2.23055553  | 2.34193015 |
| 0.48302215  | 2.23055553  | 2.34193015 |
| 6.73540354  | 9.72874641  | 2.00704742 |
| 1.74550355  | 9.72874641  | 2.00704742 |
| 7.98876715  | 3.77819967  | 1.47019899 |
| 2.99886727  | 3.77819967  | 1.47019899 |

|             |             |            |
|-------------|-------------|------------|
| 9.21347809  | 11.29064846 | 1.28800344 |
| 4.22357798  | 11.29064846 | 1.28800344 |
| 5.52626467  | 6.13002825  | 0.45987183 |
| 0.53636485  | 6.13002825  | 0.45987183 |
| 7.45328903  | 1.12937152  | 0.40848067 |
| 2.46338916  | 1.12937152  | 0.40848067 |
| 4.75647831  | 8.73880577  | 0.18583304 |
| -0.23342146 | 8.73880577  | 0.18583304 |
| 2.24347991  | 11.23942663 | 7.78225794 |
| 3.96909621  | 10.40387311 | 7.34613742 |
| 3.73822784  | 0.20698388  | 7.19303956 |
| 6.34341599  | 11.05848668 | 6.94970429 |
| 3.85374887  | 5.18013210  | 6.98755873 |
| 8.80796767  | 5.11259879  | 6.98185202 |
| -0.38689900 | 7.48987407  | 6.96181913 |
| 4.63777099  | 7.74590836  | 6.93761490 |
| 8.19120849  | 2.55224225  | 6.91060170 |
| 3.16916269  | 2.62076829  | 6.88431014 |
| 1.37771547  | 5.82262414  | 6.79332148 |
| 6.32804904  | 5.82446383  | 6.77002742 |
| 6.97596031  | 8.46260035  | 6.73407236 |
| 5.57904224  | 3.30321137  | 6.75121492 |
| 0.65907818  | 3.24557213  | 6.66053920 |
| 2.11431888  | 8.40196908  | 6.59439514 |
| 0.01954634  | 0.82828536  | 6.62914425 |
| 6.25254998  | 0.91784243  | 6.94200565 |
| 8.17735802  | 11.70175640 | 5.27628245 |
| 3.30797480  | 11.56749963 | 5.16388546 |
| 2.49789491  | 4.18344684  | 5.04732921 |
| 7.46353069  | 4.12219909  | 5.07589821 |
| 3.14573432  | 6.67677894  | 5.03501498 |
| 8.12143519  | 6.69783628  | 5.02485235 |
| 5.66948332  | 12.32758554 | 4.88136211 |
| 8.89016669  | 9.22833076  | 4.96947972 |
| 0.70883928  | 12.41563364 | 4.97072098 |
| 3.83588209  | 9.09847880  | 4.91496108 |
| 3.23810260  | 1.40756031  | 4.82300197 |
| 8.19295358  | 1.43205413  | 4.86585214 |
| 1.32301269  | 9.94550976  | 4.77535397 |
| 0.00350536  | 4.86883471  | 4.73383751 |
| 5.70907910  | 7.32957893  | 4.75745186 |
| 4.99431243  | 4.85554010  | 4.72668103 |
| 0.70645737  | 7.31199054  | 4.70642101 |
| 6.41605488  | 9.76075381  | 4.60388321 |

|             |             |            |
|-------------|-------------|------------|
| 0.76722750  | 2.16356979  | 4.50960446 |
| 5.78066301  | 2.19633585  | 4.52966121 |
| 8.92724419  | 3.16928101  | 3.13275409 |
| 3.93734455  | 3.16928101  | 3.13275409 |
| 9.65447807  | 0.51179242  | 2.92767382 |
| 4.66457796  | 0.51179242  | 2.92767382 |
| 8.19081593  | 10.75315189 | 2.92137337 |
| 3.20091629  | 10.75315189 | 2.92137337 |
| 7.52427816  | 8.16568470  | 2.89047265 |
| 2.53437829  | 8.16568470  | 2.89047265 |
| 6.46140337  | 3.88992119  | 2.81003308 |
| 1.47150326  | 3.88992119  | 2.81003308 |
| 8.23615360  | 5.59719324  | 2.75910425 |
| 3.24625349  | 5.59719324  | 2.75910425 |
| 5.72548342  | 11.29866314 | 2.69921899 |
| 0.73558354  | 11.29866314 | 2.69921899 |
| 5.02271366  | 8.84247589  | 2.64073300 |
| 0.03281343  | 8.84247589  | 2.64073300 |
| 7.16234589  | 1.15467191  | 2.58495903 |
| 2.17244577  | 1.15467191  | 2.58495903 |
| 5.69094276  | 6.28061676  | 2.47308970 |
| 0.70104283  | 6.28061676  | 2.47308970 |
| 4.72644854  | 4.52631235  | 0.98044425 |
| -0.26345146 | 4.52631235  | 0.98044425 |
| 8.98416233  | 2.08401227  | 0.94984233 |
| 3.99426270  | 2.08401227  | 0.94984233 |
| 7.49692297  | 12.16127491 | 0.88189071 |
| 2.50702286  | 12.16127491 | 0.88189071 |
| 8.92881203  | 7.14167833  | 0.77916235 |
| 3.93891239  | 7.14167833  | 0.77916235 |
| 8.23179626  | 9.65808487  | 0.74752367 |
| 3.24189639  | 9.65808487  | 0.74752367 |
| 6.50168800  | 2.71004343  | 0.73384589 |
| 1.51178777  | 2.71004343  | 0.73384589 |
| 5.78449345  | 0.24636792  | 0.66762453 |
| 0.79459333  | 0.24636792  | 0.66762453 |
| 6.40908241  | 7.83185196  | 0.60482943 |
| 1.41918242  | 7.83185196  | 0.60482943 |
| 7.18588972  | 5.31081581  | 0.60368013 |
| 2.19598985  | 5.31081581  | 0.60368013 |
| 5.68450737  | 10.28863907 | 0.50651002 |
| 0.69460732  | 10.28863907 | 0.50651002 |



# TS for CO dissociation on Fe<sub>5</sub>C<sub>2</sub>(510) step with a Cv

1.000000000000

|             |             |             |
|-------------|-------------|-------------|
| 9.97980022  | 0.00000000  | 0.00000000  |
| -0.76395801 | 12.66177369 | 0.00000000  |
| 0.00000004  | 0.00000004  | 19.64039993 |

|    |   |    |
|----|---|----|
| C  | O | Fe |
| 36 | 1 | 77 |

Cart

|             |             |            |
|-------------|-------------|------------|
| 2.59877784  | 10.09229951 | 6.10819542 |
| 4.70030758  | 1.90194043  | 7.57516097 |
| 5.49642778  | 9.30456461  | 7.50623271 |
| 7.19634560  | 4.17531709  | 7.13590926 |
| 2.20982142  | 4.21802342  | 7.16547903 |
| 2.99315450  | 6.85404262  | 7.12912482 |
| 7.88860073  | 6.86370189  | 7.08659821 |
| 4.56670144  | 11.97305789 | 6.65565092 |
| 1.94585008  | 1.27954627  | 6.27419341 |
| 7.69647281  | 10.05922078 | 6.10712693 |
| 8.01441089  | 0.25469972  | 6.50867404 |
| 0.41341470  | 8.80683272  | 5.96238007 |
| 4.17806101  | 3.12622652  | 5.21922936 |
| 9.16959316  | 3.12733800  | 5.22477362 |
| 2.22985908  | 12.35074668 | 3.67315431 |
| 4.70407922  | 10.64513249 | 4.15992184 |
| 6.71501016  | 5.64274899  | 4.04513134 |
| 1.71464859  | 5.68766328  | 4.02019805 |
| -0.30716775 | 10.89943423 | 4.25138618 |
| 7.20365134  | 12.34534453 | 3.64564584 |
| 4.23144014  | 7.22160416  | 3.46872599 |
| 9.21749768  | 7.19969686  | 3.40777104 |
| 5.47292232  | 2.23055553  | 2.34193015 |
| 0.48302215  | 2.23055553  | 2.34193015 |
| 6.73540354  | 9.72874641  | 2.00704742 |
| 1.74550355  | 9.72874641  | 2.00704742 |
| 7.98876715  | 3.77819967  | 1.47019899 |
| 2.99886727  | 3.77819967  | 1.47019899 |
| 9.21347809  | 11.29064846 | 1.28800344 |
| 4.22357798  | 11.29064846 | 1.28800344 |
| 5.52626467  | 6.13002825  | 0.45987183 |
| 0.53636485  | 6.13002825  | 0.45987183 |
| 7.45328903  | 1.12937152  | 0.40848067 |
| 2.46338916  | 1.12937152  | 0.40848067 |
| 4.75647831  | 8.73880577  | 0.18583304 |
| -0.23342146 | 8.73880577  | 0.18583304 |

|             |             |            |
|-------------|-------------|------------|
| 8.80298600  | 1.13253745  | 8.02769775 |
| 4.01574031  | 10.32055447 | 7.24210806 |
| 3.75969412  | 0.37873032  | 7.06062450 |
| 6.33747782  | 11.05910304 | 6.93432404 |
| 3.86924256  | 5.19816870  | 6.98055455 |
| 8.81972409  | 5.16906066  | 6.97825203 |
| -0.38249256 | 7.52698123  | 6.98180962 |
| 4.64251284  | 7.72300801  | 6.93378166 |
| 8.25940816  | 2.63590919  | 7.04106566 |
| 3.16898812  | 2.69173024  | 6.86446465 |
| 1.37566122  | 5.85366841  | 6.80025275 |
| 6.33668115  | 5.84880947  | 6.75315423 |
| 6.97718172  | 8.46496674  | 6.72715050 |
| 5.58779402  | 3.34089051  | 6.73776593 |
| 0.64518380  | 3.33264452  | 6.64144272 |
| 2.10074965  | 8.36778003  | 6.60186356 |
| 0.13088658  | 0.90244682  | 6.72918265 |
| 6.24206510  | 0.92207081  | 6.90497590 |
| 8.18374055  | 11.68808189 | 5.29978966 |
| 3.28294136  | 11.55037445 | 5.18782205 |
| 2.49879664  | 4.20202513  | 5.03555039 |
| 7.47966183  | 4.12443997  | 5.09449400 |
| 3.14648645  | 6.68200982  | 5.03554694 |
| 8.12510009  | 6.70686350  | 5.02070204 |
| 5.65570888  | 12.31562204 | 4.88368105 |
| 8.89147106  | 9.22578584  | 4.96133973 |
| 0.74975716  | 12.39078933 | 4.98925155 |
| 3.85728510  | 9.08356005  | 4.88848084 |
| 3.26529392  | 1.42167049  | 4.81662528 |
| 8.20492012  | 1.42824678  | 4.94971660 |
| 1.32321051  | 9.89271670  | 4.72169781 |
| 0.00343917  | 4.87687836  | 4.72165514 |
| 5.71725763  | 7.32811635  | 4.75062306 |
| 4.99646665  | 4.86369148  | 4.71983440 |
| 0.70405809  | 7.31044911  | 4.70775493 |
| 6.42000429  | 9.76564596  | 4.60489200 |
| 0.77909970  | 2.14936979  | 4.52729054 |
| 5.79213221  | 2.19491054  | 4.52692607 |
| 8.92724419  | 3.16928101  | 3.13275409 |
| 3.93734455  | 3.16928101  | 3.13275409 |
| 9.65447807  | 0.51179242  | 2.92767382 |
| 4.66457796  | 0.51179242  | 2.92767382 |
| 8.19081593  | 10.75315189 | 2.92137337 |
| 3.20091629  | 10.75315189 | 2.92137337 |

|             |             |            |
|-------------|-------------|------------|
| 7.52427816  | 8.16568470  | 2.89047265 |
| 2.53437829  | 8.16568470  | 2.89047265 |
| 6.46140337  | 3.88992119  | 2.81003308 |
| 1.47150326  | 3.88992119  | 2.81003308 |
| 8.23615360  | 5.59719324  | 2.75910425 |
| 3.24625349  | 5.59719324  | 2.75910425 |
| 5.72548342  | 11.29866314 | 2.69921899 |
| 0.73558354  | 11.29866314 | 2.69921899 |
| 5.02271366  | 8.84247589  | 2.64073300 |
| 0.03281343  | 8.84247589  | 2.64073300 |
| 7.16234589  | 1.15467191  | 2.58495903 |
| 2.17244577  | 1.15467191  | 2.58495903 |
| 5.69094276  | 6.28061676  | 2.47308970 |
| 0.70104283  | 6.28061676  | 2.47308970 |
| 4.72644854  | 4.52631235  | 0.98044425 |
| -0.26345146 | 4.52631235  | 0.98044425 |
| 8.98416233  | 2.08401227  | 0.94984233 |
| 3.99426270  | 2.08401227  | 0.94984233 |
| 7.49692297  | 12.16127491 | 0.88189071 |
| 2.50702286  | 12.16127491 | 0.88189071 |
| 8.92881203  | 7.14167833  | 0.77916235 |
| 3.93891239  | 7.14167833  | 0.77916235 |
| 8.23179626  | 9.65808487  | 0.74752367 |
| 3.24189639  | 9.65808487  | 0.74752367 |
| 6.50168800  | 2.71004343  | 0.73384589 |
| 1.51178777  | 2.71004343  | 0.73384589 |
| 5.78449345  | 0.24636792  | 0.66762453 |
| 0.79459333  | 0.24636792  | 0.66762453 |
| 6.40908241  | 7.83185196  | 0.60482943 |
| 1.41918242  | 7.83185196  | 0.60482943 |
| 7.18588972  | 5.31081581  | 0.60368013 |
| 2.19598985  | 5.31081581  | 0.60368013 |
| 5.68450737  | 10.28863907 | 0.50651002 |
| 0.69460732  | 10.28863907 | 0.50651002 |

# TS for CO dissociation on Fe<sub>5</sub>C<sub>2</sub>(510) step with a Cv

1.000000000000

|             |             |             |
|-------------|-------------|-------------|
| 9.97980022  | 0.00000000  | 0.00000000  |
| -0.76395801 | 12.66177369 | 0.00000000  |
| 0.00000004  | 0.00000004  | 19.64039993 |
| C           | O           | Fe          |
| 36          | 1           | 77          |

Cart

|             |             |            |
|-------------|-------------|------------|
| 2.61616958  | 10.07390057 | 6.08231749 |
| 4.71906680  | 1.87123720  | 7.58750303 |
| 5.51518192  | 9.30212397  | 7.50746254 |
| 7.20893627  | 4.12558035  | 7.13726903 |
| 2.19705373  | 4.20677288  | 7.20901309 |
| 2.99344600  | 6.84357861  | 7.11999372 |
| 7.89423742  | 6.82990679  | 7.08652290 |
| 4.56354297  | 11.96909322 | 6.67944092 |
| 1.81876015  | 1.59734377  | 6.18856030 |
| 7.69364337  | 10.07177863 | 6.10511378 |
| 8.08896745  | 0.45198503  | 6.61904644 |
| 0.41343233  | 8.79307807  | 5.97111361 |
| 4.18704224  | 3.12294149  | 5.23032798 |
| 9.18285042  | 3.12199584  | 5.23116787 |
| -0.31651914 | 10.87988902 | 4.24786686 |
| 4.70706527  | 10.65062847 | 4.16319832 |
| 6.71154274  | 5.64947289  | 4.03977587 |
| 1.71566104  | 5.68156061  | 4.02134331 |
| 2.22928813  | 12.35103292 | 3.68818847 |
| 7.19392129  | 12.34203527 | 3.64131037 |
| 4.23088418  | 7.22402149  | 3.47450292 |
| 9.21658813  | 7.19995309  | 3.41103611 |
| 5.47292232  | 2.23055553  | 2.34193015 |
| 0.48302215  | 2.23055553  | 2.34193015 |
| 6.73540354  | 9.72874641  | 2.00704742 |
| 1.74550355  | 9.72874641  | 2.00704742 |
| 7.98876715  | 3.77819967  | 1.47019899 |
| 2.99886727  | 3.77819967  | 1.47019899 |
| 9.21347809  | 11.29064846 | 1.28800344 |
| 4.22357798  | 11.29064846 | 1.28800344 |
| 5.52626467  | 6.13002825  | 0.45987183 |
| 0.53636485  | 6.13002825  | 0.45987183 |
| 7.45328903  | 1.12937152  | 0.40848067 |
| 2.46338916  | 1.12937152  | 0.40848067 |
| 4.75647831  | 8.73880577  | 0.18583304 |
| -0.23342146 | 8.73880577  | 0.18583304 |
| 1.77123974  | 0.02037981  | 7.08202666 |
| 4.01950896  | 10.29932128 | 7.23621294 |
| 3.73162825  | 0.34622238  | 7.12073938 |
| 6.33890503  | 11.04741428 | 6.96183881 |
| 3.86873240  | 5.19313143  | 6.98545936 |
| 8.82467446  | 5.10838493  | 6.98118032 |
| -0.38226321 | 7.49607508  | 6.97501721 |
| 4.65120898  | 7.71760352  | 6.93568246 |

|            |             |            |
|------------|-------------|------------|
| 8.21753477 | 2.54217363  | 6.91074522 |
| 3.21111081 | 2.71631045  | 6.89366204 |
| 1.37389663 | 5.82902558  | 6.80602236 |
| 6.34241925 | 5.81582015  | 6.77004352 |
| 6.99131884 | 8.45074543  | 6.72712688 |
| 5.60720730 | 3.31356479  | 6.73708003 |
| 0.68649374 | 3.22473063  | 6.65253737 |
| 2.10184467 | 8.36363654  | 6.60648893 |
| 0.01080437 | 0.72194006  | 6.72875278 |
| 6.23650286 | 0.89622456  | 6.95602725 |
| 8.16016467 | 11.69171854 | 5.26026623 |
| 3.29729843 | 11.55602307 | 5.19226732 |
| 2.49956739 | 4.18999281  | 5.03654464 |
| 7.46860480 | 4.11471809  | 5.07503664 |
| 3.14468900 | 6.67370225  | 5.03886471 |
| 8.12762840 | 6.69020285  | 5.02689973 |
| 5.65506486 | 12.31915122 | 4.90208063 |
| 8.88931322 | 9.21680727  | 4.97236844 |
| 0.75435908 | 12.32745570 | 5.01816203 |
| 3.86252087 | 9.07617550  | 4.87745172 |
| 3.21868201 | 1.43602529  | 4.82827681 |
| 8.19810224 | 1.42645611  | 4.87239527 |
| 1.32974711 | 9.86758660  | 4.71431880 |
| 0.00952488 | 4.86223912  | 4.73804506 |
| 5.71967174 | 7.32190301  | 4.75617355 |
| 4.99918032 | 4.85982563  | 4.72571899 |
| 0.70363995 | 7.30007514  | 4.70989740 |
| 6.41791785 | 9.76017754  | 4.60807341 |
| 0.74979435 | 2.12158331  | 4.51424437 |
| 5.78300860 | 2.19011410  | 4.52649486 |
| 8.92724419 | 3.16928101  | 3.13275409 |
| 3.93734455 | 3.16928101  | 3.13275409 |
| 9.65447807 | 0.51179242  | 2.92767382 |
| 4.66457796 | 0.51179242  | 2.92767382 |
| 8.19081593 | 10.75315189 | 2.92137337 |
| 3.20091629 | 10.75315189 | 2.92137337 |
| 7.52427816 | 8.16568470  | 2.89047265 |
| 2.53437829 | 8.16568470  | 2.89047265 |
| 6.46140337 | 3.88992119  | 2.81003308 |
| 1.47150326 | 3.88992119  | 2.81003308 |
| 8.23615360 | 5.59719324  | 2.75910425 |
| 3.24625349 | 5.59719324  | 2.75910425 |
| 5.72548342 | 11.29866314 | 2.69921899 |
| 0.73558354 | 11.29866314 | 2.69921899 |

|             |             |            |
|-------------|-------------|------------|
| 5.02271366  | 8.84247589  | 2.64073300 |
| 0.03281343  | 8.84247589  | 2.64073300 |
| 7.16234589  | 1.15467191  | 2.58495903 |
| 2.17244577  | 1.15467191  | 2.58495903 |
| 5.69094276  | 6.28061676  | 2.47308970 |
| 0.70104283  | 6.28061676  | 2.47308970 |
| 4.72644854  | 4.52631235  | 0.98044425 |
| -0.26345146 | 4.52631235  | 0.98044425 |
| 8.98416233  | 2.08401227  | 0.94984233 |
| 3.99426270  | 2.08401227  | 0.94984233 |
| 7.49692297  | 12.16127491 | 0.88189071 |
| 2.50702286  | 12.16127491 | 0.88189071 |
| 8.92881203  | 7.14167833  | 0.77916235 |
| 3.93891239  | 7.14167833  | 0.77916235 |
| 8.23179626  | 9.65808487  | 0.74752367 |
| 3.24189639  | 9.65808487  | 0.74752367 |
| 6.50168800  | 2.71004343  | 0.73384589 |
| 1.51178777  | 2.71004343  | 0.73384589 |
| 5.78449345  | 0.24636792  | 0.66762453 |
| 0.79459333  | 0.24636792  | 0.66762453 |
| 6.40908241  | 7.83185196  | 0.60482943 |
| 1.41918242  | 7.83185196  | 0.60482943 |
| 7.18588972  | 5.31081581  | 0.60368013 |
| 2.19598985  | 5.31081581  | 0.60368013 |
| 5.68450737  | 10.28863907 | 0.50651002 |
| 0.69460732  | 10.28863907 | 0.50651002 |

# TS for CO dissociation on Fe<sub>5</sub>C<sub>2</sub>(510) step with a Cv

1.000000000000

|             |             |             |
|-------------|-------------|-------------|
| 9.97980022  | 0.00000000  | 0.00000000  |
| -0.76395801 | 12.66177369 | 0.00000000  |
| 0.00000004  | 0.00000004  | 19.64039993 |

|    |   |    |
|----|---|----|
| C  | O | Fe |
| 36 | 1 | 77 |

Cart

|            |             |            |
|------------|-------------|------------|
| 2.59865290 | 10.09878693 | 6.09551256 |
| 4.64855487 | 1.89418596  | 7.57645155 |
| 5.49851454 | 9.30929227  | 7.50546803 |
| 7.19628176 | 4.13289154  | 7.11985543 |
| 2.09966284 | 4.21609970  | 7.25641351 |
| 2.99336007 | 6.86768158  | 7.10859361 |
| 7.88367393 | 6.83508111  | 7.09154187 |
| 4.55177732 | 11.97866980 | 6.67955531 |

|             |             |            |
|-------------|-------------|------------|
| 1.86597812  | 1.33536253  | 6.26797482 |
| 7.68313609  | 10.06958781 | 6.10694030 |
| 8.05476808  | 0.41442091  | 6.59592953 |
| 0.41018818  | 8.82161750  | 5.95320887 |
| 4.14360463  | 3.14359001  | 5.24659313 |
| 9.15683985  | 3.08115763  | 5.18576186 |
| -0.31725770 | 10.89782579 | 4.25148799 |
| 4.70555450  | 10.64844842 | 4.16181986 |
| 6.70972578  | 5.65115111  | 4.04004726 |
| 1.70445098  | 5.69611823  | 4.02068597 |
| 2.22724003  | 12.35651924 | 3.67779213 |
| 7.19269038  | 12.33308914 | 3.63730966 |
| 4.23002574  | 7.22133142  | 3.46979407 |
| 9.21272263  | 7.19849609  | 3.41147868 |
| 5.47292232  | 2.23055553  | 2.34193015 |
| 0.48302215  | 2.23055553  | 2.34193015 |
| 6.73540354  | 9.72874641  | 2.00704742 |
| 1.74550355  | 9.72874641  | 2.00704742 |
| 7.98876715  | 3.77819967  | 1.47019899 |
| 2.99886727  | 3.77819967  | 1.47019899 |
| 9.21347809  | 11.29064846 | 1.28800344 |
| 4.22357798  | 11.29064846 | 1.28800344 |
| 5.52626467  | 6.13002825  | 0.45987183 |
| 0.53636485  | 6.13002825  | 0.45987183 |
| 7.45328903  | 1.12937152  | 0.40848067 |
| 2.46338916  | 1.12937152  | 0.40848067 |
| 4.75647831  | 8.73880577  | 0.18583304 |
| -0.23342146 | 8.73880577  | 0.18583304 |
| 0.66074935  | 4.56356892  | 8.03449008 |
| 4.00781847  | 10.31802583 | 7.24257691 |
| 8.18329673  | 1.40489503  | 4.85432842 |
| 6.33039632  | 11.06391240 | 6.96201606 |
| 3.83155310  | 5.17735354  | 6.99158078 |
| 8.85124614  | 5.11140417  | 7.11215218 |
| -0.42238954 | 7.56409994  | 6.96784277 |
| 4.64685354  | 7.71895130  | 6.93966175 |
| 8.14464217  | 2.51868096  | 6.88387371 |
| 3.11436490  | 2.70443666  | 6.89949082 |
| 1.36487788  | 5.92360858  | 6.78561907 |
| 6.34335439  | 5.82110736  | 6.76775086 |
| 6.97719902  | 8.45755922  | 6.73069001 |
| 5.55790007  | 3.34055556  | 6.75145314 |
| 0.59082175  | 3.15994240  | 6.63518833 |
| 2.09060899  | 8.38692173  | 6.59535370 |

|             |             |            |
|-------------|-------------|------------|
| 3.24242909  | 1.43454425  | 4.83023451 |
| 6.21023052  | 0.91760580  | 6.97012085 |
| 8.17055033  | 11.68424633 | 5.27437646 |
| 3.28027860  | 11.55981514 | 5.18458079 |
| 2.46170889  | 4.20776911  | 5.04055541 |
| 7.48326736  | 4.13860735  | 5.09468889 |
| 3.13559659  | 6.68119543  | 5.03638357 |
| 8.12660315  | 6.67851252  | 5.04171881 |
| 5.65223387  | 12.31060850 | 4.90902433 |
| 8.87808708  | 9.22624114  | 4.95980546 |
| 0.73515797  | 12.38916302 | 4.98975448 |
| 3.85789004  | 9.08248520  | 4.88626929 |
| 0.77682614  | 2.13179985  | 4.50614753 |
| 5.77003723  | 2.20477663  | 4.54354183 |
| 1.32208204  | 9.89985433  | 4.71353627 |
| -0.01097823 | 4.86110974  | 4.72567204 |
| 5.71555127  | 7.32514948  | 4.75759472 |
| 4.98925892  | 4.86508975  | 4.72401968 |
| 0.69151256  | 7.31502595  | 4.70853722 |
| 6.41377956  | 9.76072981  | 4.60621183 |
| 3.71271381  | 0.37756335  | 7.04177712 |
| 0.00049679  | 0.79349584  | 6.61542882 |
| 8.92724419  | 3.16928101  | 3.13275409 |
| 3.93734455  | 3.16928101  | 3.13275409 |
| 9.65447807  | 0.51179242  | 2.92767382 |
| 4.66457796  | 0.51179242  | 2.92767382 |
| 8.19081593  | 10.75315189 | 2.92137337 |
| 3.20091629  | 10.75315189 | 2.92137337 |
| 7.52427816  | 8.16568470  | 2.89047265 |
| 2.53437829  | 8.16568470  | 2.89047265 |
| 6.46140337  | 3.88992119  | 2.81003308 |
| 1.47150326  | 3.88992119  | 2.81003308 |
| 8.23615360  | 5.59719324  | 2.75910425 |
| 3.24625349  | 5.59719324  | 2.75910425 |
| 5.72548342  | 11.29866314 | 2.69921899 |
| 0.73558354  | 11.29866314 | 2.69921899 |
| 5.02271366  | 8.84247589  | 2.64073300 |
| 0.03281343  | 8.84247589  | 2.64073300 |
| 7.16234589  | 1.15467191  | 2.58495903 |
| 2.17244577  | 1.15467191  | 2.58495903 |
| 5.69094276  | 6.28061676  | 2.47308970 |
| 0.70104283  | 6.28061676  | 2.47308970 |
| 4.72644854  | 4.52631235  | 0.98044425 |
| -0.26345146 | 4.52631235  | 0.98044425 |



|            |             |            |
|------------|-------------|------------|
| 8.98416233 | 2.08401227  | 0.94984233 |
| 3.99426270 | 2.08401227  | 0.94984233 |
| 7.49692297 | 12.16127491 | 0.88189071 |
| 2.50702286 | 12.16127491 | 0.88189071 |
| 8.92881203 | 7.14167833  | 0.77916235 |
| 3.93891239 | 7.14167833  | 0.77916235 |
| 8.23179626 | 9.65808487  | 0.74752367 |
| 3.24189639 | 9.65808487  | 0.74752367 |
| 6.50168800 | 2.71004343  | 0.73384589 |
| 1.51178777 | 2.71004343  | 0.73384589 |
| 5.78449345 | 0.24636792  | 0.66762453 |
| 0.79459333 | 0.24636792  | 0.66762453 |
| 6.40908241 | 7.83185196  | 0.60482943 |
| 1.41918242 | 7.83185196  | 0.60482943 |
| 7.18588972 | 5.31081581  | 0.60368013 |
| 2.19598985 | 5.31081581  | 0.60368013 |
| 5.68450737 | 10.28863907 | 0.50651002 |
| 0.69460732 | 10.28863907 | 0.50651002 |

# TS for CO dissociation on Fe<sub>5</sub>C<sub>2</sub>(510) step with a Cv

1.000000000000

|             |             |             |
|-------------|-------------|-------------|
| 9.97980022  | 0.00000000  | 0.00000000  |
| -0.76395801 | 12.66177369 | 0.00000000  |
| 0.00000004  | 0.00000004  | 19.64039993 |
| C           | O           | Fe          |
| 36          | 1           | 77          |

Cart

|             |             |            |
|-------------|-------------|------------|
| 1.88501176  | 11.16113905 | 6.25668299 |
| 4.61155373  | 1.79655301  | 7.55472782 |
| 5.48782218  | 9.31519321  | 7.45688387 |
| 7.16399070  | 4.10312486  | 7.13876712 |
| 2.16774845  | 4.17637836  | 7.19335481 |
| 2.97075797  | 6.81260670  | 7.06687321 |
| 7.88466570  | 6.81479427  | 7.07881442 |
| 4.56061625  | 11.90657776 | 6.60190227 |
| 1.80751170  | 1.41582313  | 6.21055648 |
| 7.70616874  | 10.05599899 | 6.10768963 |
| 8.03671897  | 0.42128904  | 6.58950283 |
| 0.48700126  | 8.77145484  | 5.96414468 |
| 4.15814892  | 3.11970803  | 5.24368576 |
| 9.16601214  | 3.11000847  | 5.23322493 |
| -0.28982357 | 10.89112848 | 4.25666143 |
| 4.71097830  | 10.58450571 | 4.15783307 |

|             |             |            |
|-------------|-------------|------------|
| 6.70636163  | 5.64656111  | 4.04120057 |
| 1.71292755  | 5.68128918  | 4.02869935 |
| 2.20677068  | 12.36380240 | 3.64295502 |
| 7.20820221  | 12.33175824 | 3.63955075 |
| 4.22753590  | 7.21781868  | 3.46741927 |
| 9.22212923  | 7.20414834  | 3.42749447 |
| 5.47292232  | 2.23055553  | 2.34193015 |
| 0.48302215  | 2.23055553  | 2.34193015 |
| 6.73540354  | 9.72874641  | 2.00704742 |
| 1.74550355  | 9.72874641  | 2.00704742 |
| 7.98876715  | 3.77819967  | 1.47019899 |
| 2.99886727  | 3.77819967  | 1.47019899 |
| 9.21347809  | 11.29064846 | 1.28800344 |
| 4.22357798  | 11.29064846 | 1.28800344 |
| 5.52626467  | 6.13002825  | 0.45987183 |
| 0.53636485  | 6.13002825  | 0.45987183 |
| 7.45328903  | 1.12937152  | 0.40848067 |
| 2.46338916  | 1.12937152  | 0.40848067 |
| 4.75647831  | 8.73880577  | 0.18583304 |
| -0.23342146 | 8.73880577  | 0.18583304 |
| 2.22126816  | 9.94391115  | 7.78756430 |
| 3.93697425  | 10.24617788 | 7.18131956 |
| 3.58766335  | 0.22288385  | 6.98784052 |
| 6.30142095  | 11.00313516 | 6.92485125 |
| 3.84397821  | 5.15386020  | 6.98799517 |
| 8.79326398  | 5.08276037  | 6.99299538 |
| -0.38915878 | 7.48655243  | 6.95077608 |
| 4.64310715  | 7.69137780  | 6.92844972 |
| 8.14785687  | 2.51188302  | 6.89694019 |
| 3.13144820  | 2.64140268  | 6.88799672 |
| 1.36347380  | 5.81616712  | 6.78681150 |
| 6.32505839  | 5.79877804  | 6.77232104 |
| 6.98642518  | 8.43818669  | 6.72316047 |
| 5.55432245  | 3.27180473  | 6.75723153 |
| 0.63473413  | 3.23749987  | 6.66184933 |
| 2.12259153  | 8.42596858  | 6.78683131 |
| -0.01810388 | 0.80524008  | 6.61176825 |
| 6.16668506  | 0.85038905  | 6.97918454 |
| 8.17936892  | 11.67866206 | 5.28206115 |
| 3.32221307  | 11.57206276 | 5.11492712 |
| 2.48087339  | 4.18015397  | 5.03973731 |
| 7.45279732  | 4.10511040  | 5.07486097 |
| 3.14325447  | 6.66326932  | 5.03784657 |
| 8.12449219  | 6.68428282  | 5.02898448 |

|             |             |            |
|-------------|-------------|------------|
| 5.67016900  | 12.31376947 | 4.89752761 |
| 8.92049034  | 9.22215154  | 4.97910449 |
| 0.82266283  | 12.28577429 | 5.16196466 |
| 3.81310778  | 9.04872322  | 4.90234151 |
| 3.20819272  | 1.44947488  | 4.78357795 |
| 8.18780935  | 1.41615690  | 4.84893656 |
| 1.37791906  | 9.95061801  | 4.85353195 |
| -0.00382616 | 4.86112358  | 4.73362884 |
| 5.71297471  | 7.31374495  | 4.75531440 |
| 4.98660886  | 4.84971985  | 4.72635477 |
| 0.72446402  | 7.32118457  | 4.70135795 |
| 6.42934294  | 9.74105795  | 4.59919739 |
| 0.76344046  | 2.12856167  | 4.52085138 |
| 5.76931361  | 2.18775310  | 4.53449760 |
| 8.92724419  | 3.16928101  | 3.13275409 |
| 3.93734455  | 3.16928101  | 3.13275409 |
| 9.65447807  | 0.51179242  | 2.92767382 |
| 4.66457796  | 0.51179242  | 2.92767382 |
| 8.19081593  | 10.75315189 | 2.92137337 |
| 3.20091629  | 10.75315189 | 2.92137337 |
| 7.52427816  | 8.16568470  | 2.89047265 |
| 2.53437829  | 8.16568470  | 2.89047265 |
| 6.46140337  | 3.88992119  | 2.81003308 |
| 1.47150326  | 3.88992119  | 2.81003308 |
| 8.23615360  | 5.59719324  | 2.75910425 |
| 3.24625349  | 5.59719324  | 2.75910425 |
| 5.72548342  | 11.29866314 | 2.69921899 |
| 0.73558354  | 11.29866314 | 2.69921899 |
| 5.02271366  | 8.84247589  | 2.64073300 |
| 0.03281343  | 8.84247589  | 2.64073300 |
| 7.16234589  | 1.15467191  | 2.58495903 |
| 2.17244577  | 1.15467191  | 2.58495903 |
| 5.69094276  | 6.28061676  | 2.47308970 |
| 0.70104283  | 6.28061676  | 2.47308970 |
| 4.72644854  | 4.52631235  | 0.98044425 |
| -0.26345146 | 4.52631235  | 0.98044425 |
| 8.98416233  | 2.08401227  | 0.94984233 |
| 3.99426270  | 2.08401227  | 0.94984233 |
| 7.49692297  | 12.16127491 | 0.88189071 |
| 2.50702286  | 12.16127491 | 0.88189071 |
| 8.92881203  | 7.14167833  | 0.77916235 |
| 3.93891239  | 7.14167833  | 0.77916235 |
| 8.23179626  | 9.65808487  | 0.74752367 |
| 3.24189639  | 9.65808487  | 0.74752367 |

|            |             |            |
|------------|-------------|------------|
| 6.50168800 | 2.71004343  | 0.73384589 |
| 1.51178777 | 2.71004343  | 0.73384589 |
| 5.78449345 | 0.24636792  | 0.66762453 |
| 0.79459333 | 0.24636792  | 0.66762453 |
| 6.40908241 | 7.83185196  | 0.60482943 |
| 1.41918242 | 7.83185196  | 0.60482943 |
| 7.18588972 | 5.31081581  | 0.60368013 |
| 2.19598985 | 5.31081581  | 0.60368013 |
| 5.68450737 | 10.28863907 | 0.50651002 |
| 0.69460732 | 10.28863907 | 0.50651002 |

### 3. Overall reaction on Fe<sub>5</sub>C<sub>2</sub>(510)

# initial surface

1.000000000000

|             |             |             |    |
|-------------|-------------|-------------|----|
| 9.97980000  | 0.00000000  | 0.00000000  |    |
| -0.76395804 | 12.66177393 | 0.00000000  |    |
| 0.00000004  | 0.00000004  | 19.64040000 |    |
| H           | C           | O           | Fe |
| 1           | 40          | 4           | 80 |

Cart

|             |             |            |
|-------------|-------------|------------|
| 6.23581648  | 11.29929823 | 7.98149737 |
| 4.18402567  | 9.28404395  | 7.39198609 |
| 4.61332398  | 2.61459424  | 8.23477451 |
| 9.61375556  | 2.58847831  | 8.22430880 |
| 1.76529787  | 7.56834535  | 8.41856012 |
| 6.76980137  | 7.56733894  | 8.42109808 |
| 9.18514733  | 9.29866646  | 7.38420566 |
| 2.19714686  | 4.25653243  | 7.20570056 |
| 7.18386037  | 4.24824034  | 7.20290182 |
| 3.39820142  | 11.91939810 | 7.21345754 |
| 8.44134990  | 11.94988251 | 7.17326582 |
| -0.33921456 | 6.76553499  | 6.31033185 |
| 4.65310395  | 6.76493419  | 6.31078535 |
| 1.73848201  | 1.63316525  | 6.15918681 |
| 6.72629099  | 1.59948976  | 6.18356596 |
| 2.16829749  | 8.28863940  | 5.59900280 |
| 7.15779497  | 8.28096927  | 5.59436730 |
| 9.19439451  | 3.12966576  | 5.30384615 |
| 4.20751175  | 3.13172729  | 5.30732542 |
| 4.66889265  | 10.80422112 | 4.26160246 |
| -0.31999390 | 10.80744823 | 4.26620420 |
| 6.72108418  | 5.68829989  | 4.01312451 |
| 1.73080471  | 5.69080495  | 4.01362675 |

|             |             |            |
|-------------|-------------|------------|
| 7.17656074  | 12.34635592 | 3.64064963 |
| 2.19298306  | 12.34735744 | 3.63971322 |
| 9.22785870  | 7.20079090  | 3.34058915 |
| 4.23741461  | 7.20213005  | 3.34033314 |
| 5.47292232  | 2.23055553  | 2.34193015 |
| 0.48302215  | 2.23055553  | 2.34193015 |
| 6.73540354  | 9.72874641  | 2.00704742 |
| 1.74550355  | 9.72874641  | 2.00704742 |
| 7.98876715  | 3.77819967  | 1.47019899 |
| 2.99886727  | 3.77819967  | 1.47019899 |
| 9.21347809  | 11.29064846 | 1.28800344 |
| 4.22357798  | 11.29064846 | 1.28800344 |
| 5.52626467  | 6.13002825  | 0.45987183 |
| 0.53636485  | 6.13002825  | 0.45987183 |
| 7.45328903  | 1.12937152  | 0.40848067 |
| 2.46338916  | 1.12937152  | 0.40848067 |
| 4.75647831  | 8.73880577  | 0.18583304 |
| -0.23342146 | 8.73880577  | 0.18583304 |
| 6.59031470  | 7.33076881  | 9.57563206 |
| 4.74866807  | 2.45343336  | 9.41070087 |
| 9.76501884  | 2.41139664  | 9.39580214 |
| 1.59902275  | 7.32093222  | 9.57379847 |
| 2.51618224  | 10.23465133 | 7.11162346 |
| 0.02080486  | 10.91622962 | 6.85594722 |
| 3.17375016  | 7.77635171  | 7.13420743 |
| 8.16326911  | 7.79044147  | 7.13425611 |
| 0.68108432  | 12.42312823 | 4.88790136 |
| 7.50898239  | 0.06916714  | 7.07175689 |
| 3.86885519  | 5.15888083  | 6.98924869 |
| 8.85173415  | 5.16326629  | 6.99362039 |
| 3.21426300  | 2.72251373  | 6.92575149 |
| 8.19868839  | 2.71219198  | 6.92715227 |
| 0.70738833  | 8.32291023  | 6.95013195 |
| 5.69447264  | 8.31302644  | 6.95052580 |
| 4.97337580  | 10.91538622 | 6.93457971 |
| 7.52781401  | 10.28017104 | 7.19163431 |
| 1.37231834  | 5.88814328  | 6.79074136 |
| 6.36731069  | 5.88533869  | 6.78558044 |
| 0.69695899  | 3.27530121  | 6.73941934 |
| 5.68966396  | 3.25716975  | 6.74210586 |
| 0.01602308  | 0.88680686  | 6.69198122 |
| 4.99133995  | 0.86265993  | 6.71163248 |
| 3.24115544  | 11.75874324 | 5.18768513 |
| 8.22813416  | 11.76376084 | 5.17661396 |

|             |             |            |
|-------------|-------------|------------|
| 8.87344097  | 9.23042709  | 5.09010797 |
| 3.89413180  | 9.22766598  | 5.08714145 |
| 7.50456064  | 4.21843951  | 5.04041005 |
| 2.51438309  | 4.22184758  | 5.03882501 |
| 8.19337780  | 6.74999671  | 4.92164703 |
| 3.20236614  | 6.75199129  | 4.91923472 |
| 5.66675401  | 12.41046644 | 4.90580039 |
| 2.51285314  | 0.08668885  | 7.02832621 |
| 3.23174038  | 1.47525429  | 4.84038903 |
| 8.21636223  | 1.46565068  | 4.84605967 |
| 1.39873464  | 9.88847819  | 4.80894164 |
| 6.39129681  | 9.89467078  | 4.84000954 |
| 5.01487350  | 4.84412015  | 4.73872418 |
| 0.02230192  | 4.84602481  | 4.73910395 |
| 0.72132859  | 7.28455396  | 4.70843742 |
| 5.71128964  | 7.28180970  | 4.70654873 |
| 5.74829465  | 2.18169740  | 4.51827188 |
| 0.75529832  | 2.18927466  | 4.51307417 |
| 8.92724419  | 3.16928101  | 3.13275409 |
| 3.93734455  | 3.16928101  | 3.13275409 |
| 9.65447807  | 0.51179242  | 2.92767382 |
| 4.66457796  | 0.51179242  | 2.92767382 |
| 8.19081593  | 10.75315189 | 2.92137337 |
| 3.20091629  | 10.75315189 | 2.92137337 |
| 7.52427816  | 8.16568470  | 2.89047265 |
| 2.53437829  | 8.16568470  | 2.89047265 |
| 6.46140337  | 3.88992119  | 2.81003308 |
| 1.47150326  | 3.88992119  | 2.81003308 |
| 8.23615360  | 5.59719324  | 2.75910425 |
| 3.24625349  | 5.59719324  | 2.75910425 |
| 5.72548342  | 11.29866314 | 2.69921899 |
| 0.73558354  | 11.29866314 | 2.69921899 |
| 5.02271366  | 8.84247589  | 2.64073300 |
| 0.03281343  | 8.84247589  | 2.64073300 |
| 7.16234589  | 1.15467191  | 2.58495903 |
| 2.17244577  | 1.15467191  | 2.58495903 |
| 5.69094276  | 6.28061676  | 2.47308970 |
| 0.70104283  | 6.28061676  | 2.47308970 |
| 4.72644854  | 4.52631235  | 0.98044425 |
| -0.26345146 | 4.52631235  | 0.98044425 |
| 8.98416233  | 2.08401227  | 0.94984233 |
| 3.99426270  | 2.08401227  | 0.94984233 |
| 7.49692297  | 12.16127491 | 0.88189071 |
| 2.50702286  | 12.16127491 | 0.88189071 |

|            |             |            |
|------------|-------------|------------|
| 8.92881203 | 7.14167833  | 0.77916235 |
| 3.93891239 | 7.14167833  | 0.77916235 |
| 8.23179626 | 9.65808487  | 0.74752367 |
| 3.24189639 | 9.65808487  | 0.74752367 |
| 6.50168800 | 2.71004343  | 0.73384589 |
| 1.51178777 | 2.71004343  | 0.73384589 |
| 5.78449345 | 0.24636792  | 0.66762453 |
| 0.79459333 | 0.24636792  | 0.66762453 |
| 6.40908241 | 7.83185196  | 0.60482943 |
| 1.41918242 | 7.83185196  | 0.60482943 |
| 7.18588972 | 5.31081581  | 0.60368013 |
| 2.19598985 | 5.31081581  | 0.60368013 |
| 5.68450737 | 10.28863907 | 0.50651002 |
| 0.69460732 | 10.28863907 | 0.50651002 |

# TS for  $C_{cv}+H \rightarrow CH_{cv}$

1.000000000000

|             |             |             |    |
|-------------|-------------|-------------|----|
| 9.97980000  | 0.00000000  | 0.00000000  |    |
| -0.76395804 | 12.66177393 | 0.00000000  |    |
| 0.00000004  | 0.00000004  | 19.64040000 |    |
| H           | C           | O           | Fe |
| 1           | 40          | 4           | 80 |

Cart

|             |             |            |
|-------------|-------------|------------|
| 5.06922392  | 10.28275967 | 8.32986370 |
| 4.26271919  | 9.31394253  | 7.51129659 |
| 4.61092351  | 2.60035863  | 8.22733035 |
| 9.60452338  | 2.61099120  | 8.22727092 |
| 1.81045056  | 7.54945049  | 8.43592691 |
| 6.78677610  | 7.63363969  | 8.44136498 |
| 9.19112328  | 9.29486909  | 7.40229122 |
| 2.19452721  | 4.26084452  | 7.20373251 |
| 7.18869882  | 4.24821459  | 7.20872987 |
| 3.41612117  | 11.91381286 | 7.19008283 |
| 8.39738018  | 11.92946683 | 7.20409843 |
| -0.32200302 | 6.76644307  | 6.31598722 |
| 4.66035613  | 6.77615076  | 6.31631023 |
| 1.73066062  | 1.62682420  | 6.17313465 |
| 6.72649848  | 1.61904361  | 6.16711010 |
| 2.19298011  | 8.31545475  | 5.63918302 |
| 7.16900384  | 8.28950287  | 5.60214588 |
| 9.19762873  | 3.14087555  | 5.30271512 |
| 4.20462897  | 3.13847212  | 5.30373982 |
| 4.67672384  | 10.82890639 | 4.27574562 |

|             |             |            |
|-------------|-------------|------------|
| -0.31889031 | 10.81401548 | 4.26623124 |
| 6.72515041  | 5.69501281  | 4.01392943 |
| 1.73812703  | 5.70675197  | 4.01681055 |
| 7.18272916  | 12.34880376 | 3.64375051 |
| 2.18661244  | 12.34953767 | 3.63785057 |
| 9.23140964  | 7.20150067  | 3.34538816 |
| 4.23941220  | 7.20401263  | 3.34689688 |
| 5.47292232  | 2.23055553  | 2.34193015 |
| 0.48302215  | 2.23055553  | 2.34193015 |
| 6.73540354  | 9.72874641  | 2.00704742 |
| 1.74550355  | 9.72874641  | 2.00704742 |
| 7.98876715  | 3.77819967  | 1.47019899 |
| 2.99886727  | 3.77819967  | 1.47019899 |
| 9.21347809  | 11.29064846 | 1.28800344 |
| 4.22357798  | 11.29064846 | 1.28800344 |
| 5.52626467  | 6.13002825  | 0.45987183 |
| 0.53636485  | 6.13002825  | 0.45987183 |
| 7.45328903  | 1.12937152  | 0.40848067 |
| 2.46338916  | 1.12937152  | 0.40848067 |
| 4.75647831  | 8.73880577  | 0.18583304 |
| -0.23342146 | 8.73880577  | 0.18583304 |
| 6.63751856  | 7.43745144  | 9.60706859 |
| 4.74887991  | 2.42708132  | 9.40104421 |
| 9.73994427  | 2.44528948  | 9.40324492 |
| 1.61269646  | 7.30485335  | 9.58480962 |
| 2.49367281  | 10.22562399 | 7.05929498 |
| 0.00899488  | 10.92093831 | 6.88791435 |
| 3.21414618  | 7.81576637  | 7.17231551 |
| 8.18024611  | 7.78753239  | 7.13708695 |
| 0.67740658  | 12.42323958 | 4.89609332 |
| 7.48345318  | 0.06402608  | 7.04080677 |
| 3.87384380  | 5.16629802  | 6.99049382 |
| 8.85815667  | 5.16676278  | 6.99241216 |
| 3.20887365  | 2.72672427  | 6.92413664 |
| 8.20079486  | 2.71952844  | 6.92219567 |
| 0.72096641  | 8.32711228  | 6.97098664 |
| 5.71316241  | 8.28808778  | 6.94808266 |
| 4.96122212  | 10.89096345 | 6.88646794 |
| 7.51817780  | 10.24506872 | 7.13621658 |
| 1.39732404  | 5.90651609  | 6.79223951 |
| 6.37424779  | 5.87716423  | 6.78069391 |
| 0.69823432  | 3.27003730  | 6.73817874 |
| 5.68649573  | 3.26396620  | 6.73993866 |
| 0.00592349  | 0.86678950  | 6.71301112 |



|             |             |            |
|-------------|-------------|------------|
| 4.99620092  | 0.86451794  | 6.70852491 |
| 3.24329165  | 11.77754695 | 5.17652340 |
| 8.23182339  | 11.76561087 | 5.18792145 |
| 8.88677975  | 9.22847299  | 5.07833626 |
| 3.90748049  | 9.22836862  | 5.05204713 |
| 7.50535464  | 4.22399327  | 5.03926567 |
| 2.51505685  | 4.23225586  | 5.03968972 |
| 8.19992573  | 6.75339427  | 4.92414009 |
| 3.20493560  | 6.76852070  | 4.93570910 |
| 5.67709246  | 12.42929366 | 4.89987000 |
| 2.52053609  | 0.07858143  | 7.03036708 |
| 3.22204341  | 1.48225519  | 4.84069796 |
| 8.22090832  | 1.47873878  | 4.83821310 |
| 1.40309255  | 9.88802135  | 4.79882623 |
| 6.39371683  | 9.89496932  | 4.82906153 |
| 5.01440469  | 4.85066964  | 4.73475241 |
| 0.02957991  | 4.85771469  | 4.74124157 |
| 0.73269544  | 7.30508432  | 4.71412923 |
| 5.71714696  | 7.28642991  | 4.70164289 |
| 5.74298656  | 2.18641822  | 4.51463147 |
| 0.75410502  | 2.18827373  | 4.51670817 |
| 8.92724419  | 3.16928101  | 3.13275409 |
| 3.93734455  | 3.16928101  | 3.13275409 |
| 9.65447807  | 0.51179242  | 2.92767382 |
| 4.66457796  | 0.51179242  | 2.92767382 |
| 8.19081593  | 10.75315189 | 2.92137337 |
| 3.20091629  | 10.75315189 | 2.92137337 |
| 7.52427816  | 8.16568470  | 2.89047265 |
| 2.53437829  | 8.16568470  | 2.89047265 |
| 6.46140337  | 3.88992119  | 2.81003308 |
| 1.47150326  | 3.88992119  | 2.81003308 |
| 8.23615360  | 5.59719324  | 2.75910425 |
| 3.24625349  | 5.59719324  | 2.75910425 |
| 5.72548342  | 11.29866314 | 2.69921899 |
| 0.73558354  | 11.29866314 | 2.69921899 |
| 5.02271366  | 8.84247589  | 2.64073300 |
| 0.03281343  | 8.84247589  | 2.64073300 |
| 7.16234589  | 1.15467191  | 2.58495903 |
| 2.17244577  | 1.15467191  | 2.58495903 |
| 5.69094276  | 6.28061676  | 2.47308970 |
| 0.70104283  | 6.28061676  | 2.47308970 |
| 4.72644854  | 4.52631235  | 0.98044425 |
| -0.26345146 | 4.52631235  | 0.98044425 |
| 8.98416233  | 2.08401227  | 0.94984233 |

|            |             |            |
|------------|-------------|------------|
| 3.99426270 | 2.08401227  | 0.94984233 |
| 7.49692297 | 12.16127491 | 0.88189071 |
| 2.50702286 | 12.16127491 | 0.88189071 |
| 8.92881203 | 7.14167833  | 0.77916235 |
| 3.93891239 | 7.14167833  | 0.77916235 |
| 8.23179626 | 9.65808487  | 0.74752367 |
| 3.24189639 | 9.65808487  | 0.74752367 |
| 6.50168800 | 2.71004343  | 0.73384589 |
| 1.51178777 | 2.71004343  | 0.73384589 |
| 5.78449345 | 0.24636792  | 0.66762453 |
| 0.79459333 | 0.24636792  | 0.66762453 |
| 6.40908241 | 7.83185196  | 0.60482943 |
| 1.41918242 | 7.83185196  | 0.60482943 |
| 7.18588972 | 5.31081581  | 0.60368013 |
| 2.19598985 | 5.31081581  | 0.60368013 |
| 5.68450737 | 10.28863907 | 0.50651002 |
| 0.69460732 | 10.28863907 | 0.50651002 |

# CH<sub>v</sub>

1.000000000000

|             |             |             |    |
|-------------|-------------|-------------|----|
| 9.97980000  | 0.00000000  | 0.00000000  |    |
| -0.76395804 | 12.66177393 | 0.00000000  |    |
| 0.00000004  | 0.00000004  | 19.64040000 |    |
| H           | C           | O           | Fe |
| 1           | 40          | 4           | 80 |

Cart

|             |             |            |
|-------------|-------------|------------|
| 4.26760081  | 9.47085157  | 9.03246855 |
| 4.24370067  | 9.27096600  | 7.94522819 |
| 4.61315163  | 2.58784339  | 8.22648845 |
| 9.61005636  | 2.64526630  | 8.23192414 |
| 1.84557766  | 7.46888504  | 8.42360104 |
| 6.71163708  | 7.75905319  | 8.46142713 |
| 9.19656405  | 9.29234551  | 7.39296645 |
| 2.20367641  | 4.26398451  | 7.19054161 |
| 7.18278319  | 4.25912815  | 7.19732562 |
| 3.41507675  | 11.87387090 | 7.16443683 |
| 8.40042922  | 11.91871764 | 7.19530769 |
| -0.32856796 | 6.77284141  | 6.32362767 |
| 4.65307110  | 6.81988165  | 6.31852018 |
| 1.73679618  | 1.61952222  | 6.17847915 |
| 6.72405995  | 1.62003638  | 6.16854660 |
| 2.20381969  | 8.34683058  | 5.67399986 |
| 7.15845454  | 8.29340890  | 5.61153518 |

|             |             |            |
|-------------|-------------|------------|
| 9.19720835  | 3.13993186  | 5.30321651 |
| 4.20385276  | 3.13996645  | 5.30266302 |
| 4.67810468  | 10.82262329 | 4.27346587 |
| -0.31932600 | 10.81815921 | 4.26867571 |
| 6.72398381  | 5.69752372  | 4.01757542 |
| 1.73352733  | 5.70897960  | 4.01653097 |
| 7.17916199  | 12.34932281 | 3.64084325 |
| 2.18819125  | 12.34927762 | 3.63833071 |
| 9.23267851  | 7.20034519  | 3.35087729 |
| 4.24025810  | 7.21190782  | 3.35908539 |
| 5.47292232  | 2.23055553  | 2.34193015 |
| 0.48302215  | 2.23055553  | 2.34193015 |
| 6.73540354  | 9.72874641  | 2.00704742 |
| 1.74550355  | 9.72874641  | 2.00704742 |
| 7.98876715  | 3.77819967  | 1.47019899 |
| 2.99886727  | 3.77819967  | 1.47019899 |
| 9.21347809  | 11.29064846 | 1.28800344 |
| 4.22357798  | 11.29064846 | 1.28800344 |
| 5.52626467  | 6.13002825  | 0.45987183 |
| 0.53636485  | 6.13002825  | 0.45987183 |
| 7.45328903  | 1.12937152  | 0.40848067 |
| 2.46338916  | 1.12937152  | 0.40848067 |
| 4.75647831  | 8.73880577  | 0.18583304 |
| -0.23342146 | 8.73880577  | 0.18583304 |
| 6.64903099  | 7.53241315  | 9.62971600 |
| 4.76025605  | 2.41762234  | 9.39983837 |
| 9.73678660  | 2.49349698  | 9.40970852 |
| 1.62944268  | 7.16922304  | 9.55856139 |
| 2.55868327  | 10.17405279 | 7.03951925 |
| 0.01571770  | 10.91880924 | 6.87746689 |
| 3.22967562  | 7.81806103  | 7.17094982 |
| 8.15866412  | 7.79573682  | 7.14232429 |
| 0.67888467  | 12.42795139 | 4.89445021 |
| 7.49618394  | 0.06740903  | 7.02696984 |
| 3.88479547  | 5.17239534  | 6.97188051 |
| 8.85555447  | 5.16924422  | 6.98861506 |
| 3.21434092  | 2.72578985  | 6.92381307 |
| 8.19999074  | 2.72575191  | 6.92385964 |
| 0.72385354  | 8.31809750  | 6.97933212 |
| 5.66905131  | 8.36100012  | 6.97126056 |
| 4.98291128  | 10.82729506 | 6.86489656 |
| 7.52670943  | 10.22948086 | 7.11104263 |
| 1.39155891  | 5.90700771  | 6.79543328 |
| 6.36278541  | 5.88993461  | 6.76448966 |

|            |             |            |
|------------|-------------|------------|
| 0.70078376 | 3.27331658  | 6.73715430 |
| 5.68615410 | 3.25867132  | 6.73841487 |
| 0.00851469 | 0.86675412  | 6.71311013 |
| 5.00072860 | 0.83980138  | 6.71652251 |
| 3.24203259 | 11.76349945 | 5.16910472 |
| 8.22873725 | 11.76491639 | 5.18015073 |
| 8.88384946 | 9.22783241  | 5.07643210 |
| 3.88353196 | 9.19575680  | 4.96507758 |
| 7.50676537 | 4.22612939  | 5.03607825 |
| 2.51282597 | 4.23173305  | 5.03644271 |
| 8.19541015 | 6.75945050  | 4.93007718 |
| 3.19465840 | 6.75481993  | 4.93658514 |
| 5.66827587 | 12.42277056 | 4.89958509 |
| 2.52643260 | 0.06057193  | 7.02101763 |
| 3.22717134 | 1.48013488  | 4.84181176 |
| 8.21863294 | 1.47738784  | 4.84262484 |
| 1.39624940 | 9.88592843  | 4.77655820 |
| 6.39029755 | 9.88419202  | 4.80783827 |
| 5.01421628 | 4.84700148  | 4.72396609 |
| 0.02771911 | 4.86066826  | 4.74168980 |
| 0.73303309 | 7.31874820  | 4.71767242 |
| 5.71390909 | 7.28883471  | 4.71357097 |
| 5.74486381 | 2.18659894  | 4.51539284 |
| 0.75594787 | 2.18737033  | 4.51875917 |
| 8.92724419 | 3.16928101  | 3.13275409 |
| 3.93734455 | 3.16928101  | 3.13275409 |
| 9.65447807 | 0.51179242  | 2.92767382 |
| 4.66457796 | 0.51179242  | 2.92767382 |
| 8.19081593 | 10.75315189 | 2.92137337 |
| 3.20091629 | 10.75315189 | 2.92137337 |
| 7.52427816 | 8.16568470  | 2.89047265 |
| 2.53437829 | 8.16568470  | 2.89047265 |
| 6.46140337 | 3.88992119  | 2.81003308 |
| 1.47150326 | 3.88992119  | 2.81003308 |
| 8.23615360 | 5.59719324  | 2.75910425 |
| 3.24625349 | 5.59719324  | 2.75910425 |
| 5.72548342 | 11.29866314 | 2.69921899 |
| 0.73558354 | 11.29866314 | 2.69921899 |
| 5.02271366 | 8.84247589  | 2.64073300 |
| 0.03281343 | 8.84247589  | 2.64073300 |
| 7.16234589 | 1.15467191  | 2.58495903 |
| 2.17244577 | 1.15467191  | 2.58495903 |
| 5.69094276 | 6.28061676  | 2.47308970 |
| 0.70104283 | 6.28061676  | 2.47308970 |

|             |             |            |
|-------------|-------------|------------|
| 4.72644854  | 4.52631235  | 0.98044425 |
| -0.26345146 | 4.52631235  | 0.98044425 |
| 8.98416233  | 2.08401227  | 0.94984233 |
| 3.99426270  | 2.08401227  | 0.94984233 |
| 7.49692297  | 12.16127491 | 0.88189071 |
| 2.50702286  | 12.16127491 | 0.88189071 |
| 8.92881203  | 7.14167833  | 0.77916235 |
| 3.93891239  | 7.14167833  | 0.77916235 |
| 8.23179626  | 9.65808487  | 0.74752367 |
| 3.24189639  | 9.65808487  | 0.74752367 |
| 6.50168800  | 2.71004343  | 0.73384589 |
| 1.51178777  | 2.71004343  | 0.73384589 |
| 5.78449345  | 0.24636792  | 0.66762453 |
| 0.79459333  | 0.24636792  | 0.66762453 |
| 6.40908241  | 7.83185196  | 0.60482943 |
| 1.41918242  | 7.83185196  | 0.60482943 |
| 7.18588972  | 5.31081581  | 0.60368013 |
| 2.19598985  | 5.31081581  | 0.60368013 |
| 5.68450737  | 10.28863907 | 0.50651002 |
| 0.69460732  | 10.28863907 | 0.50651002 |

# TS for CH<sub>Cv</sub>->CH+Cv

1.000000000000

|             |             |             |    |
|-------------|-------------|-------------|----|
| 9.97980000  | 0.00000000  | 0.00000000  |    |
| -0.76395804 | 12.66177393 | 0.00000000  |    |
| 0.00000004  | 0.00000004  | 19.64040000 |    |
| H           | C           | O           | Fe |
| 1           | 40          | 4           | 80 |

Cart

|             |             |            |
|-------------|-------------|------------|
| 5.05813156  | 9.68068192  | 9.21190724 |
| 5.20024748  | 9.59897490  | 8.12530892 |
| 4.60400051  | 2.56636046  | 8.22705474 |
| 9.60447407  | 2.59995530  | 8.22492051 |
| 1.70943727  | 7.86127218  | 8.48806676 |
| 6.77917195  | 7.45583879  | 8.41616859 |
| 9.17049357  | 9.28909183  | 7.39152251 |
| 2.21145963  | 4.26554229  | 7.20787035 |
| 7.18840026  | 4.24531610  | 7.19158966 |
| 3.43453493  | 11.82346934 | 7.17624796 |
| 8.35436880  | 11.91615526 | 7.21399702 |
| -0.30802093 | 6.75760048  | 6.31961903 |
| 4.67481215  | 6.88135532  | 6.37071274 |
| 1.72988112  | 1.61853708  | 6.18326452 |

|             |             |            |
|-------------|-------------|------------|
| 6.71916035  | 1.60960317  | 6.15793339 |
| 2.17809584  | 8.36302815  | 5.66180437 |
| 7.18606355  | 8.28191523  | 5.60465734 |
| 9.20107280  | 3.14325888  | 5.30387714 |
| 4.20351064  | 3.13981486  | 5.30276032 |
| 4.68168442  | 10.84021138 | 4.30410984 |
| -0.32614289 | 10.82044984 | 4.27838607 |
| 6.72708434  | 5.69625709  | 4.02062057 |
| 1.73759185  | 5.71682007  | 4.02138428 |
| 7.18522064  | 12.34804657 | 3.63961776 |
| 2.18030264  | 12.35198500 | 3.63216795 |
| 9.23205929  | 7.20153288  | 3.34528702 |
| 4.24243423  | 7.20998675  | 3.37424218 |
| 5.47292232  | 2.23055553  | 2.34193015 |
| 0.48302215  | 2.23055553  | 2.34193015 |
| 6.73540354  | 9.72874641  | 2.00704742 |
| 1.74550355  | 9.72874641  | 2.00704742 |
| 7.98876715  | 3.77819967  | 1.47019899 |
| 2.99886727  | 3.77819967  | 1.47019899 |
| 9.21347809  | 11.29064846 | 1.28800344 |
| 4.22357798  | 11.29064846 | 1.28800344 |
| 5.52626467  | 6.13002825  | 0.45987183 |
| 0.53636485  | 6.13002825  | 0.45987183 |
| 7.45328903  | 1.12937152  | 0.40848067 |
| 2.46338916  | 1.12937152  | 0.40848067 |
| 4.75647831  | 8.73880577  | 0.18583304 |
| -0.23342146 | 8.73880577  | 0.18583304 |
| 6.68822092  | 7.16052220  | 9.56944406 |
| 4.75836659  | 2.39016735  | 9.39727697 |
| 9.73584158  | 2.43632845  | 9.40122508 |
| 1.80926624  | 7.66221596  | 9.65718584 |
| 2.40514229  | 10.23756232 | 6.94459561 |
| -0.04441591 | 10.91908480 | 6.88261616 |
| 3.25777445  | 7.93147900  | 7.19686578 |
| 8.21192636  | 7.75157806  | 7.14315205 |
| 0.67273922  | 12.42419138 | 4.90323568 |
| 7.44270069  | 0.03518523  | 7.02545567 |
| 3.88781357  | 5.20270666  | 6.95333402 |
| 8.87038593  | 5.14745175  | 6.97893509 |
| 3.21256668  | 2.73034394  | 6.92626117 |
| 8.19702801  | 2.70805502  | 6.92139434 |
| 0.72302255  | 8.34365061  | 6.98785251 |
| 5.79995738  | 8.30169069  | 6.99179729 |
| 4.95715378  | 10.80689391 | 6.77232487 |

|            |             |            |
|------------|-------------|------------|
| 7.46593358 | 10.21581037 | 7.19518824 |
| 1.41289706 | 5.89512977  | 6.75291437 |
| 6.36046606 | 5.87005089  | 6.76245944 |
| 0.70691776 | 3.26648344  | 6.74364147 |
| 5.68440130 | 3.24566372  | 6.73760590 |
| 0.00446291 | 0.84871521  | 6.73709639 |
| 4.98985988 | 0.82038820  | 6.71441592 |
| 3.23384405 | 11.78165044 | 5.15394439 |
| 8.21278046 | 11.75097978 | 5.19585105 |
| 8.88655383 | 9.22570776  | 5.09182306 |
| 3.89895989 | 9.19530370  | 4.98361083 |
| 7.50721195 | 4.21761473  | 5.03801849 |
| 2.51995823 | 4.23646037  | 5.03356743 |
| 8.20493141 | 6.75225908  | 4.92048210 |
| 3.19431338 | 6.77233792  | 4.97837743 |
| 5.67190051 | 12.45332826 | 4.87441610 |
| 2.53498701 | 0.06342218  | 7.03017497 |
| 3.21778733 | 1.48605123  | 4.84334500 |
| 8.22988869 | 1.47203680  | 4.84376652 |
| 1.39350620 | 9.88075823  | 4.72255548 |
| 6.39431768 | 9.87073072  | 4.78491483 |
| 5.01494338 | 4.84488450  | 4.71980072 |
| 0.03445906 | 4.85656624  | 4.73661422 |
| 0.73574424 | 7.31774487  | 4.71607548 |
| 5.71726866 | 7.27899967  | 4.71475392 |
| 5.74179343 | 2.19180587  | 4.51031828 |
| 0.75402371 | 2.18541257  | 4.52411168 |
| 8.92724419 | 3.16928101  | 3.13275409 |
| 3.93734455 | 3.16928101  | 3.13275409 |
| 9.65447807 | 0.51179242  | 2.92767382 |
| 4.66457796 | 0.51179242  | 2.92767382 |
| 8.19081593 | 10.75315189 | 2.92137337 |
| 3.20091629 | 10.75315189 | 2.92137337 |
| 7.52427816 | 8.16568470  | 2.89047265 |
| 2.53437829 | 8.16568470  | 2.89047265 |
| 6.46140337 | 3.88992119  | 2.81003308 |
| 1.47150326 | 3.88992119  | 2.81003308 |
| 8.23615360 | 5.59719324  | 2.75910425 |
| 3.24625349 | 5.59719324  | 2.75910425 |
| 5.72548342 | 11.29866314 | 2.69921899 |
| 0.73558354 | 11.29866314 | 2.69921899 |
| 5.02271366 | 8.84247589  | 2.64073300 |
| 0.03281343 | 8.84247589  | 2.64073300 |
| 7.16234589 | 1.15467191  | 2.58495903 |

|             |             |            |
|-------------|-------------|------------|
| 2.17244577  | 1.15467191  | 2.58495903 |
| 5.69094276  | 6.28061676  | 2.47308970 |
| 0.70104283  | 6.28061676  | 2.47308970 |
| 4.72644854  | 4.52631235  | 0.98044425 |
| -0.26345146 | 4.52631235  | 0.98044425 |
| 8.98416233  | 2.08401227  | 0.94984233 |
| 3.99426270  | 2.08401227  | 0.94984233 |
| 7.49692297  | 12.16127491 | 0.88189071 |
| 2.50702286  | 12.16127491 | 0.88189071 |
| 8.92881203  | 7.14167833  | 0.77916235 |
| 3.93891239  | 7.14167833  | 0.77916235 |
| 8.23179626  | 9.65808487  | 0.74752367 |
| 3.24189639  | 9.65808487  | 0.74752367 |
| 6.50168800  | 2.71004343  | 0.73384589 |
| 1.51178777  | 2.71004343  | 0.73384589 |
| 5.78449345  | 0.24636792  | 0.66762453 |
| 0.79459333  | 0.24636792  | 0.66762453 |
| 6.40908241  | 7.83185196  | 0.60482943 |
| 1.41918242  | 7.83185196  | 0.60482943 |
| 7.18588972  | 5.31081581  | 0.60368013 |
| 2.19598985  | 5.31081581  | 0.60368013 |
| 5.68450737  | 10.28863907 | 0.50651002 |
| 0.69460732  | 10.28863907 | 0.50651002 |

# CH+Cv

1.000000000000

|             |             |             |    |
|-------------|-------------|-------------|----|
| 9.97980000  | 0.00000000  | 0.00000000  |    |
| -0.76395804 | 12.66177393 | 0.00000000  |    |
| 0.00000004  | 0.00000004  | 19.64040000 |    |
| H           | C           | O           | Fe |
| 1           | 40          | 4           | 80 |

Cart

|            |             |            |
|------------|-------------|------------|
| 5.79361396 | 10.00881905 | 9.20135951 |
| 5.88305581 | 9.95683315  | 8.10768940 |
| 4.60869251 | 2.57498351  | 8.22798886 |
| 9.60637952 | 2.62675626  | 8.22680158 |
| 1.69273636 | 7.71431575  | 8.46836462 |
| 6.82853276 | 7.27041746  | 8.36722891 |
| 9.17489165 | 9.30179836  | 7.38532270 |
| 2.21840861 | 4.26297900  | 7.19928991 |
| 7.17068517 | 4.26747990  | 7.17404457 |
| 3.44798575 | 11.79061511 | 7.19630317 |
| 8.39372807 | 11.92245520 | 7.18714364 |



|             |             |            |
|-------------|-------------|------------|
| -0.32218674 | 6.75499633  | 6.31219916 |
| 4.65711156  | 6.91588832  | 6.39476835 |
| 1.73864942  | 1.61404069  | 6.17885345 |
| 6.71854491  | 1.60773945  | 6.16956192 |
| 2.17760081  | 8.35481681  | 5.65645014 |
| 7.16029172  | 8.28485346  | 5.62496155 |
| 9.19714221  | 3.14546668  | 5.30404640 |
| 4.20517669  | 3.13616944  | 5.30392412 |
| 4.67855008  | 10.82692700 | 4.29601789 |
| -0.32291727 | 10.81860813 | 4.28013228 |
| 6.72258194  | 5.70035370  | 4.01878876 |
| 1.73424531  | 5.70800092  | 4.01975562 |
| 7.18040342  | 12.35064579 | 3.63377939 |
| 2.18211413  | 12.35216718 | 3.62694935 |
| 9.22950569  | 7.20130737  | 3.34495913 |
| 4.24155130  | 7.20748596  | 3.36803743 |
| 5.47292232  | 2.23055553  | 2.34193015 |
| 0.48302215  | 2.23055553  | 2.34193015 |
| 6.73540354  | 9.72874641  | 2.00704742 |
| 1.74550355  | 9.72874641  | 2.00704742 |
| 7.98876715  | 3.77819967  | 1.47019899 |
| 2.99886727  | 3.77819967  | 1.47019899 |
| 9.21347809  | 11.29064846 | 1.28800344 |
| 4.22357798  | 11.29064846 | 1.28800344 |
| 5.52626467  | 6.13002825  | 0.45987183 |
| 0.53636485  | 6.13002825  | 0.45987183 |
| 7.45328903  | 1.12937152  | 0.40848067 |
| 2.46338916  | 1.12937152  | 0.40848067 |
| 4.75647831  | 8.73880577  | 0.18583304 |
| -0.23342146 | 8.73880577  | 0.18583304 |
| 6.59307755  | 7.07898573  | 9.52311005 |
| 4.77190345  | 2.40330642  | 9.39925928 |
| 9.73464961  | 2.47544660  | 9.40556880 |
| 1.64951971  | 7.48928880  | 9.63908104 |
| 2.44277096  | 10.19038948 | 6.94195497 |
| -0.00573000 | 10.92057590 | 6.84997014 |
| 3.13405959  | 7.79900924  | 7.17392295 |
| 8.20279573  | 7.75245172  | 7.14837599 |
| 0.68132728  | 12.43091150 | 4.89685071 |
| 7.47375733  | 0.05003152  | 7.02982685 |
| 3.88626004  | 5.20695274  | 6.95436722 |
| 8.86077208  | 5.15531624  | 6.98764704 |
| 3.21599889  | 2.72437156  | 6.92623104 |
| 8.19145077  | 2.71934195  | 6.92453615 |

|            |             |            |
|------------|-------------|------------|
| 0.69429719 | 8.34017056  | 6.96723960 |
| 5.76022962 | 8.40092338  | 6.96005157 |
| 4.99055464 | 10.84379645 | 6.76170543 |
| 7.52271612 | 10.24197437 | 7.15352520 |
| 1.39842698 | 5.88346260  | 6.75582540 |
| 6.34902471 | 5.92234962  | 6.80043657 |
| 0.70462946 | 3.27460197  | 6.74037155 |
| 5.68254501 | 3.24900459  | 6.73501673 |
| 0.01560994 | 0.86406960  | 6.72737979 |
| 4.99441318 | 0.80955742  | 6.72096709 |
| 3.22704955 | 11.76781823 | 5.15810528 |
| 8.21896294 | 11.76349401 | 5.17716998 |
| 8.87978532 | 9.22364466  | 5.08155897 |
| 3.91636453 | 9.19377310  | 5.02872156 |
| 7.50286845 | 4.22890276  | 5.04283659 |
| 2.51978147 | 4.23170400  | 5.03241956 |
| 8.19899875 | 6.75879650  | 4.92249898 |
| 3.19297354 | 6.76294047  | 4.95057929 |
| 5.67821935 | 12.43735587 | 4.87964307 |
| 2.55427006 | 0.05452719  | 7.02765652 |
| 3.22762304 | 1.48131331  | 4.84337004 |
| 8.22420320 | 1.48480248  | 4.84264691 |
| 1.39581434 | 9.88000363  | 4.72191226 |
| 6.40508750 | 9.87127925  | 4.76500388 |
| 5.01290672 | 4.84523609  | 4.72156390 |
| 0.02480724 | 4.85835903  | 4.73158690 |
| 0.73485006 | 7.31731345  | 4.70932820 |
| 5.71191403 | 7.27549662  | 4.72162490 |
| 5.74636425 | 2.18910521  | 4.51234720 |
| 0.75588570 | 2.18875440  | 4.52281090 |
| 8.93206166 | 3.17824094  | 3.12792051 |
| 3.93734455 | 3.16928101  | 3.13275409 |
| 9.65447807 | 0.51179242  | 2.92767382 |
| 4.66457796 | 0.51179242  | 2.92767382 |
| 8.19081593 | 10.75315189 | 2.92137337 |
| 3.20091629 | 10.75315189 | 2.92137337 |
| 7.52427816 | 8.16568470  | 2.89047265 |
| 2.53437829 | 8.16568470  | 2.89047265 |
| 6.46140337 | 3.88992119  | 2.81003308 |
| 1.47150326 | 3.88992119  | 2.81003308 |
| 8.23615360 | 5.59719324  | 2.75910425 |
| 3.24625349 | 5.59719324  | 2.75910425 |
| 5.72548342 | 11.29866314 | 2.69921899 |
| 0.73558354 | 11.29866314 | 2.69921899 |

|             |             |            |
|-------------|-------------|------------|
| 5.02271366  | 8.84247589  | 2.64073300 |
| 0.03281343  | 8.84247589  | 2.64073300 |
| 7.16234589  | 1.15467191  | 2.58495903 |
| 2.17244577  | 1.15467191  | 2.58495903 |
| 5.69094276  | 6.28061676  | 2.47308970 |
| 0.70104283  | 6.28061676  | 2.47308970 |
| 4.72644854  | 4.52631235  | 0.98044425 |
| -0.26345146 | 4.52631235  | 0.98044425 |
| 8.98416233  | 2.08401227  | 0.94984233 |
| 3.99426270  | 2.08401227  | 0.94984233 |
| 7.49692297  | 12.16127491 | 0.88189071 |
| 2.50702286  | 12.16127491 | 0.88189071 |
| 8.92881203  | 7.14167833  | 0.77916235 |
| 3.93891239  | 7.14167833  | 0.77916235 |
| 8.23179626  | 9.65808487  | 0.74752367 |
| 3.24189639  | 9.65808487  | 0.74752367 |
| 6.50168800  | 2.71004343  | 0.73384589 |
| 1.51178777  | 2.71004343  | 0.73384589 |
| 5.78449345  | 0.24636792  | 0.66762453 |
| 0.79459333  | 0.24636792  | 0.66762453 |
| 6.40908241  | 7.83185196  | 0.60482943 |
| 1.41918242  | 7.83185196  | 0.60482943 |
| 7.18588972  | 5.31081581  | 0.60368013 |
| 2.19598985  | 5.31081581  | 0.60368013 |
| 5.68450737  | 10.28863907 | 0.50651002 |
| 0.69460732  | 10.28863907 | 0.50651002 |

# CO<sub>cν</sub> (state1)

1.000000000000

|             |             |             |    |
|-------------|-------------|-------------|----|
| 9.97980000  | 0.00000000  | 0.00000000  |    |
| -0.76395804 | 12.66177393 | 0.00000000  |    |
| 0.00000004  | 0.00000004  | 19.64040000 |    |
| H           | C           | O           | Fe |
| 1           | 41          | 5           | 80 |

Cart

|            |             |            |
|------------|-------------|------------|
| 5.83796966 | 10.03441554 | 9.19015563 |
| 5.95341103 | 10.03092473 | 8.09823090 |
| 4.61464310 | 2.59859987  | 8.22673504 |
| 9.60964312 | 2.65603001  | 8.22792141 |
| 3.65028974 | 8.58650722  | 8.78441564 |
| 1.67919135 | 7.20775463  | 8.36919138 |
| 7.07040501 | 7.05811941  | 8.42106004 |
| 9.18126134 | 9.27955884  | 7.38807519 |

|             |             |            |
|-------------|-------------|------------|
| 2.20898641  | 4.25555173  | 7.18284796 |
| 7.16155950  | 4.25502649  | 7.16716904 |
| 3.45039526  | 11.79941785 | 7.19499329 |
| 8.41336530  | 11.91310639 | 7.18144033 |
| -0.32659699 | 6.71751651  | 6.25932945 |
| 4.64680987  | 6.86700393  | 6.38875201 |
| 1.73862990  | 1.60724395  | 6.17673490 |
| 6.72100643  | 1.60399513  | 6.16447658 |
| 2.18453114  | 8.36149018  | 5.68033790 |
| 7.14695831  | 8.28823944  | 5.61313927 |
| 9.19750709  | 3.14310175  | 5.29560695 |
| 4.20336537  | 3.13524112  | 5.29767512 |
| 4.68045766  | 10.82623116 | 4.29484038 |
| -0.31959422 | 10.81274353 | 4.27509869 |
| 6.72022760  | 5.69646322  | 4.01884073 |
| 1.73839344  | 5.71217298  | 4.01833308 |
| 7.18251676  | 12.34892874 | 3.63037651 |
| 2.18627440  | 12.35183222 | 3.62813021 |
| 9.22733459  | 7.20203706  | 3.33130037 |
| 4.24186498  | 7.21334886  | 3.38116325 |
| 5.47292232  | 2.23055553  | 2.34193015 |
| 0.48302215  | 2.23055553  | 2.34193015 |
| 6.73540354  | 9.72874641  | 2.00704742 |
| 1.74550355  | 9.72874641  | 2.00704742 |
| 7.98876715  | 3.77819967  | 1.47019899 |
| 2.99886727  | 3.77819967  | 1.47019899 |
| 9.21347809  | 11.29064846 | 1.28800344 |
| 4.22357798  | 11.29064846 | 1.28800344 |
| 5.52626467  | 6.13002825  | 0.45987183 |
| 0.53636485  | 6.13002825  | 0.45987183 |
| 7.45328903  | 1.12937152  | 0.40848067 |
| 2.46338916  | 1.12937152  | 0.40848067 |
| 4.75647831  | 8.73880577  | 0.18583304 |
| -0.23342146 | 8.73880577  | 0.18583304 |
| 6.76292113  | 6.94822480  | 9.56513535 |
| 4.75383614  | 2.43921757  | 9.40271679 |
| 9.72363201  | 2.51603682  | 9.40886061 |
| 1.34140164  | 6.97600133  | 9.49422129 |
| 3.78300322  | 9.02044044  | 9.86213486 |
| 2.46276750  | 10.17358930 | 6.95906628 |
| 0.01281485  | 10.90005146 | 6.84361938 |
| 3.16983850  | 7.77868467  | 7.27301084 |
| 8.19879443  | 7.74287335  | 7.12386839 |
| 0.68421459  | 12.43077257 | 4.89222622 |

|            |             |            |
|------------|-------------|------------|
| 7.49300860 | 0.05277873  | 7.03070061 |
| 3.89846941 | 5.17214598  | 6.98412757 |
| 8.84195334 | 5.16889408  | 7.02608720 |
| 3.20978490 | 2.71410827  | 6.92142957 |
| 8.19272097 | 2.71781732  | 6.92011680 |
| 0.67825902 | 8.28626080  | 6.94745017 |
| 5.68878465 | 8.43180393  | 6.97264791 |
| 5.02026109 | 10.90272509 | 6.75895629 |
| 7.54347224 | 10.23480127 | 7.13176422 |
| 1.39475023 | 5.88876787  | 6.79057954 |
| 6.37064201 | 5.92585393  | 6.82820797 |
| 0.69782263 | 3.27255625  | 6.73160003 |
| 5.67656281 | 3.24595989  | 6.72978744 |
| 0.01731917 | 0.86152421  | 6.72013951 |
| 4.99639275 | 0.81560996  | 6.71656516 |
| 3.22614255 | 11.75679167 | 5.16464092 |
| 8.22503924 | 11.76202497 | 5.17519942 |
| 8.87427555 | 9.22304834  | 5.08045999 |
| 3.91128792 | 9.19071082  | 5.04263761 |
| 7.50404552 | 4.23200759  | 5.04679722 |
| 2.51982370 | 4.23729669  | 5.03773717 |
| 8.18929188 | 6.76410556  | 4.90435762 |
| 3.19223087 | 6.77617871  | 4.98156794 |
| 5.68254204 | 12.44010282 | 4.87558413 |
| 2.55420144 | 0.04428671  | 7.02663170 |
| 3.23334939 | 1.47518749  | 4.84253553 |
| 8.22778439 | 1.48072096  | 4.84107171 |
| 1.40025755 | 9.87531727  | 4.73856029 |
| 6.40610382 | 9.87958180  | 4.76674502 |
| 5.01035645 | 4.85072388  | 4.72179175 |
| 0.02282458 | 4.87252320  | 4.75116900 |
| 0.74747474 | 7.32794775  | 4.69801615 |
| 5.70556265 | 7.27764294  | 4.73980354 |
| 5.74721316 | 2.18864809  | 4.50904036 |
| 0.76002255 | 2.18788504  | 4.51862094 |
| 8.92724419 | 3.16928101  | 3.13275409 |
| 3.93734455 | 3.16928101  | 3.13275409 |
| 9.65447807 | 0.51179242  | 2.92767382 |
| 4.66457796 | 0.51179242  | 2.92767382 |
| 8.19081593 | 10.75315189 | 2.92137337 |
| 3.20091629 | 10.75315189 | 2.92137337 |
| 7.52427816 | 8.16568470  | 2.89047265 |
| 2.53437829 | 8.16568470  | 2.89047265 |
| 6.46140337 | 3.88992119  | 2.81003308 |

|             |             |            |
|-------------|-------------|------------|
| 1.47150326  | 3.88992119  | 2.81003308 |
| 8.23615360  | 5.59719324  | 2.75910425 |
| 3.24625349  | 5.59719324  | 2.75910425 |
| 5.72548342  | 11.29866314 | 2.69921899 |
| 0.73558354  | 11.29866314 | 2.69921899 |
| 5.02271366  | 8.84247589  | 2.64073300 |
| 0.03281343  | 8.84247589  | 2.64073300 |
| 7.16234589  | 1.15467191  | 2.58495903 |
| 2.17244577  | 1.15467191  | 2.58495903 |
| 5.69094276  | 6.28061676  | 2.47308970 |
| 0.70104283  | 6.28061676  | 2.47308970 |
| 4.72644854  | 4.52631235  | 0.98044425 |
| -0.26345146 | 4.52631235  | 0.98044425 |
| 8.98416233  | 2.08401227  | 0.94984233 |
| 3.99426270  | 2.08401227  | 0.94984233 |
| 7.49692297  | 12.16127491 | 0.88189071 |
| 2.50702286  | 12.16127491 | 0.88189071 |
| 8.92881203  | 7.14167833  | 0.77916235 |
| 3.93891239  | 7.14167833  | 0.77916235 |
| 8.23179626  | 9.65808487  | 0.74752367 |
| 3.24189639  | 9.65808487  | 0.74752367 |
| 6.50168800  | 2.71004343  | 0.73384589 |
| 1.51178777  | 2.71004343  | 0.73384589 |
| 5.78449345  | 0.24636792  | 0.66762453 |
| 0.79459333  | 0.24636792  | 0.66762453 |
| 6.40908241  | 7.83185196  | 0.60482943 |
| 1.41918242  | 7.83185196  | 0.60482943 |
| 7.18588972  | 5.31081581  | 0.60368013 |
| 2.19598985  | 5.31081581  | 0.60368013 |
| 5.68450737  | 10.28863907 | 0.50651002 |
| 0.69460732  | 10.28863907 | 0.50651002 |

# CO<sub>Cv</sub> (state2)

1.000000000000

|             |             |             |    |
|-------------|-------------|-------------|----|
| 9.97980000  | 0.00000000  | 0.00000000  |    |
| -0.76395804 | 12.66177393 | 0.00000000  |    |
| 0.00000004  | 0.00000004  | 19.64040000 |    |
| H           | C           | O           | Fe |
| 1           | 41          | 5           | 80 |

Cart

|            |            |            |
|------------|------------|------------|
| 6.64938988 | 7.16226332 | 9.31262792 |
| 6.75517278 | 7.32992315 | 8.23149855 |
| 4.60579968 | 2.57894953 | 8.21983474 |
| 9.60380114 | 2.63857050 | 8.22436023 |

|             |             |            |
|-------------|-------------|------------|
| 4.38404950  | 8.98381200  | 8.29507387 |
| 1.94952397  | 7.43703428  | 8.45804440 |
| 0.89834103  | 11.31412996 | 8.51112306 |
| 9.15191365  | 9.25277916  | 7.41304323 |
| 2.19571172  | 4.24393311  | 7.19263955 |
| 7.16895488  | 4.25505553  | 7.20322140 |
| 3.47228905  | 11.83558774 | 7.12663158 |
| 8.36653730  | 11.88566859 | 7.20758674 |
| -0.32354395 | 6.71437710  | 6.29285480 |
| 4.65581603  | 6.79754119  | 6.28770537 |
| 1.72995286  | 1.58954954  | 6.19096883 |
| 6.71918950  | 1.62042153  | 6.15770331 |
| 2.20758204  | 8.35425278  | 5.67733229 |
| 7.16708212  | 8.29087041  | 5.58098548 |
| 9.19595658  | 3.14074535  | 5.29633352 |
| 4.19625092  | 3.13006079  | 5.29030858 |
| 4.68228668  | 10.81117487 | 4.27617767 |
| -0.32339499 | 10.80478292 | 4.25898310 |
| 6.72477015  | 5.69015505  | 4.01478123 |
| 1.73532059  | 5.70524391  | 4.01693166 |
| 7.18688952  | 12.34921507 | 3.63956507 |
| 2.18195649  | 12.34975632 | 3.64251570 |
| 9.22885723  | 7.20096099  | 3.33608954 |
| 4.23810532  | 7.21340128  | 3.35323374 |
| 5.47292232  | 2.23055553  | 2.34193015 |
| 0.48302215  | 2.23055553  | 2.34193015 |
| 6.73540354  | 9.72874641  | 2.00704742 |
| 1.74550355  | 9.72874641  | 2.00704742 |
| 7.98876715  | 3.77819967  | 1.47019899 |
| 2.99886727  | 3.77819967  | 1.47019899 |
| 9.21347809  | 11.29064846 | 1.28800344 |
| 4.22357798  | 11.29064846 | 1.28800344 |
| 5.52626467  | 6.13002825  | 0.45987183 |
| 0.53636485  | 6.13002825  | 0.45987183 |
| 7.45328903  | 1.12937152  | 0.40848067 |
| 2.46338916  | 1.12937152  | 0.40848067 |
| 4.75647831  | 8.73880577  | 0.18583304 |
| -0.23342146 | 8.73880577  | 0.18583304 |
| 1.19241104  | 11.45659647 | 9.64691093 |
| 4.74416845  | 2.40221184  | 9.39339441 |
| 9.70490111  | 2.46928347  | 9.40279126 |
| 1.57980736  | 7.20335938  | 9.56425671 |
| 4.34241507  | 9.53697122  | 9.35791492 |
| 2.45150189  | 10.20952608 | 6.98632374 |

|             |             |            |
|-------------|-------------|------------|
| -0.01961833 | 10.89690812 | 7.02543655 |
| 3.23337953  | 7.81278599  | 7.18510106 |
| 8.17110231  | 7.74483232  | 7.11049727 |
| 0.67938348  | 12.39929106 | 4.93143758 |
| 7.48645931  | 0.05319732  | 7.02313197 |
| 3.87684488  | 5.16953217  | 6.99606487 |
| 8.85197119  | 5.15508239  | 7.04356334 |
| 3.20313867  | 2.70438059  | 6.91757181 |
| 8.19082305  | 2.71687171  | 6.91795150 |
| 0.69102300  | 8.28591734  | 6.96191997 |
| 5.68751493  | 8.30308611  | 7.00323504 |
| 5.01878362  | 10.80501225 | 6.73682646 |
| 7.49912844  | 10.19552699 | 7.09305344 |
| 1.41510379  | 5.90106279  | 6.80496669 |
| 6.35635779  | 5.91033489  | 6.90496878 |
| 0.69626236  | 3.25353706  | 6.73468111 |
| 5.67317204  | 3.26004389  | 6.73555492 |
| -0.00825426 | 0.84848809  | 6.71532114 |
| 5.00894668  | 0.82965094  | 6.70812972 |
| 3.24188717  | 11.75364001 | 5.16037558 |
| 8.22949115  | 11.74265289 | 5.19603747 |
| 8.89350463  | 9.22376675  | 5.09614757 |
| 3.88890848  | 9.18809315  | 4.98435455 |
| 7.50191103  | 4.22860790  | 5.05338560 |
| 2.51351198  | 4.23086093  | 5.04385661 |
| 8.20300356  | 6.75568849  | 4.90549714 |
| 3.19526489  | 6.76283514  | 4.93825489 |
| 5.68070376  | 12.41926702 | 4.88478396 |
| 2.55968422  | 0.05494561  | 7.07847300 |
| 3.22793793  | 1.45290447  | 4.85148127 |
| 8.22310229  | 1.47137328  | 4.84285331 |
| 1.39313411  | 9.88024063  | 4.77077369 |
| 6.38624126  | 9.85287955  | 4.77575367 |
| 5.01386886  | 4.85532402  | 4.74452910 |
| 0.02821897  | 4.87171912  | 4.76694807 |
| 0.74313461  | 7.32535725  | 4.70435681 |
| 5.72112682  | 7.28165466  | 4.71721940 |
| 5.74150396  | 2.18447083  | 4.51403973 |
| 0.75602261  | 2.17388471  | 4.52082796 |
| 8.92724419  | 3.16928101  | 3.13275409 |
| 3.93734455  | 3.16928101  | 3.13275409 |
| 9.65447807  | 0.51179242  | 2.92767382 |
| 4.66457796  | 0.51179242  | 2.92767382 |
| 8.19081593  | 10.75315189 | 2.92137337 |



|             |             |            |
|-------------|-------------|------------|
| 3.20091629  | 10.75315189 | 2.92137337 |
| 7.52427816  | 8.16568470  | 2.89047265 |
| 2.53437829  | 8.16568470  | 2.89047265 |
| 6.46140337  | 3.88992119  | 2.81003308 |
| 1.47150326  | 3.88992119  | 2.81003308 |
| 8.23615360  | 5.59719324  | 2.75910425 |
| 3.24625349  | 5.59719324  | 2.75910425 |
| 5.72548342  | 11.29866314 | 2.69921899 |
| 0.73558354  | 11.29866314 | 2.69921899 |
| 5.02271366  | 8.84247589  | 2.64073300 |
| 0.03281343  | 8.84247589  | 2.64073300 |
| 7.16234589  | 1.15467191  | 2.58495903 |
| 2.17244577  | 1.15467191  | 2.58495903 |
| 5.69094276  | 6.28061676  | 2.47308970 |
| 0.70104283  | 6.28061676  | 2.47308970 |
| 4.72644854  | 4.52631235  | 0.98044425 |
| -0.26345146 | 4.52631235  | 0.98044425 |
| 8.98416233  | 2.08401227  | 0.94984233 |
| 3.99426270  | 2.08401227  | 0.94984233 |
| 7.49692297  | 12.16127491 | 0.88189071 |
| 2.50702286  | 12.16127491 | 0.88189071 |
| 8.92881203  | 7.14167833  | 0.77916235 |
| 3.93891239  | 7.14167833  | 0.77916235 |
| 8.23179626  | 9.65808487  | 0.74752367 |
| 3.24189639  | 9.65808487  | 0.74752367 |
| 6.50168800  | 2.71004343  | 0.73384589 |
| 1.51178777  | 2.71004343  | 0.73384589 |
| 5.78449345  | 0.24636792  | 0.66762453 |
| 0.79459333  | 0.24636792  | 0.66762453 |
| 6.40908241  | 7.83185196  | 0.60482943 |
| 1.41918242  | 7.83185196  | 0.60482943 |
| 7.18588972  | 5.31081581  | 0.60368013 |
| 2.19598985  | 5.31081581  | 0.60368013 |
| 5.68450737  | 10.28863907 | 0.50651002 |
| 0.69460732  | 10.28863907 | 0.50651002 |

# TS for CO<sub>CV</sub>->C<sub>CV</sub>+O

1.000000000000

|             |             |             |    |
|-------------|-------------|-------------|----|
| 9.97980000  | 0.00000000  | 0.00000000  |    |
| -0.76395804 | 12.66177393 | 0.00000000  |    |
| 0.00000004  | 0.00000004  | 19.64040000 |    |
| H           | C           | O           | Fe |
| 1           | 41          | 5           | 80 |

Cart

|             |             |            |
|-------------|-------------|------------|
| 6.71491244  | 7.07986060  | 9.29640059 |
| 6.83799061  | 7.15655452  | 8.20773376 |
| 4.60467669  | 2.58299553  | 8.21309436 |
| 9.58573218  | 2.63279662  | 8.23504348 |
| 4.25320032  | 9.29882970  | 7.45382394 |
| 1.83011935  | 7.46179150  | 8.42386238 |
| 0.95787372  | 11.28797023 | 8.47426170 |
| 9.13867686  | 9.26682313  | 7.40012025 |
| 2.18799189  | 4.24985505  | 7.20012920 |
| 7.17280399  | 4.24373922  | 7.20230572 |
| 3.45186758  | 11.94572336 | 7.13641375 |
| 8.35788323  | 11.91513628 | 7.21618175 |
| -0.32037580 | 6.72199387  | 6.27654162 |
| 4.66218967  | 6.73532761  | 6.27361302 |
| 1.71879853  | 1.59908339  | 6.19095014 |
| 6.71895816  | 1.65168961  | 6.13331058 |
| 2.18657616  | 8.30169478  | 5.63726222 |
| 7.14966161  | 8.28848140  | 5.58473691 |
| 9.19539697  | 3.14402413  | 5.30036743 |
| 4.19160424  | 3.13424140  | 5.28905875 |
| 4.67711838  | 10.82980025 | 4.28766900 |
| -0.32972095 | 10.79804408 | 4.26454073 |
| 6.72234075  | 5.69276860  | 4.01695666 |
| 1.73213800  | 5.70326024  | 4.01448219 |
| 7.18496618  | 12.34982715 | 3.63945189 |
| 2.17600004  | 12.34841588 | 3.63928378 |
| 9.22516316  | 7.20080046  | 3.32787055 |
| 4.23712934  | 7.20602424  | 3.34004344 |
| 5.47292232  | 2.23055553  | 2.34193015 |
| 0.48302215  | 2.23055553  | 2.34193015 |
| 6.73540354  | 9.72874641  | 2.00704742 |
| 1.74550355  | 9.72874641  | 2.00704742 |
| 7.98876715  | 3.77819967  | 1.47019899 |
| 2.99886727  | 3.77819967  | 1.47019899 |
| 9.21347809  | 11.29064846 | 1.28800344 |
| 4.22357798  | 11.29064846 | 1.28800344 |
| 5.52626467  | 6.13002825  | 0.45987183 |
| 0.53636485  | 6.13002825  | 0.45987183 |
| 7.45328903  | 1.12937152  | 0.40848067 |
| 2.46338916  | 1.12937152  | 0.40848067 |
| 4.75647831  | 8.73880577  | 0.18583304 |
| -0.23342146 | 8.73880577  | 0.18583304 |
| 1.23590460  | 11.37647017 | 9.62629314 |

|             |             |            |
|-------------|-------------|------------|
| 4.74546121  | 2.39907159  | 9.38575743 |
| 9.72992777  | 2.47658209  | 9.41001769 |
| 1.59738099  | 7.24747182  | 9.57606786 |
| 5.69092691  | 9.78186259  | 8.23146728 |
| 2.55178526  | 10.24904271 | 7.17322738 |
| -0.04243957 | 10.91271095 | 7.01388750 |
| 3.20117437  | 7.78328069  | 7.16522048 |
| 8.21317152  | 7.72880530  | 7.10753393 |
| 0.66048418  | 12.40536551 | 4.92227162 |
| 7.49204839  | 0.11825050  | 7.01426906 |
| 3.86385191  | 5.16159815  | 7.01122901 |
| 8.84803499  | 5.17091129  | 7.05036207 |
| 3.19221366  | 2.70861344  | 6.91671539 |
| 8.19772297  | 2.72444317  | 6.92081912 |
| 0.70373870  | 8.29723202  | 6.97390049 |
| 5.75144571  | 8.21821612  | 7.01636533 |
| 4.99981611  | 10.94430937 | 6.79719714 |
| 7.44569043  | 10.24137042 | 7.22815384 |
| 1.39880026  | 5.90209904  | 6.81200057 |
| 6.36859521  | 5.88423130  | 6.85984978 |
| 0.69054441  | 3.26302577  | 6.73772361 |
| 5.66751208  | 3.27840511  | 6.73436850 |
| -0.01845887 | 0.86424736  | 6.71639213 |
| 5.00642292  | 0.89170508  | 6.67682405 |
| 3.22757777  | 11.77194234 | 5.16669462 |
| 8.20888132  | 11.74049553 | 5.20745185 |
| 8.86637321  | 9.25454745  | 5.14376587 |
| 3.87719571  | 9.23474526  | 5.06674567 |
| 7.50168367  | 4.22676288  | 5.04520377 |
| 2.51039126  | 4.23597777  | 5.04507789 |
| 8.19274018  | 6.76892178  | 4.89585319 |
| 3.19822113  | 6.76783563  | 4.92535875 |
| 5.67014795  | 12.44491027 | 4.86600893 |
| 2.52640015  | 0.07255378  | 7.07848089 |
| 3.21490415  | 1.46440440  | 4.84380587 |
| 8.22639484  | 1.48251726  | 4.83351721 |
| 1.39143059  | 9.89983556  | 4.86195655 |
| 6.39160408  | 9.88664657  | 4.77615326 |
| 5.00384193  | 4.85880236  | 4.73586616 |
| 0.02183331  | 4.87055114  | 4.76302731 |
| 0.73191086  | 7.31285498  | 4.70376431 |
| 5.71523512  | 7.29554724  | 4.71515096 |
| 5.73897205  | 2.20148380  | 4.50449077 |
| 0.75483597  | 2.18374139  | 4.51875206 |

|             |             |            |
|-------------|-------------|------------|
| 8.92724419  | 3.16928101  | 3.13275409 |
| 3.93734455  | 3.16928101  | 3.13275409 |
| 9.65447807  | 0.51179242  | 2.92767382 |
| 4.66457796  | 0.51179242  | 2.92767382 |
| 8.19081593  | 10.75315189 | 2.92137337 |
| 3.20091629  | 10.75315189 | 2.92137337 |
| 7.52427816  | 8.16568470  | 2.89047265 |
| 2.53437829  | 8.16568470  | 2.89047265 |
| 6.46140337  | 3.88992119  | 2.81003308 |
| 1.47150326  | 3.88992119  | 2.81003308 |
| 8.23615360  | 5.59719324  | 2.75910425 |
| 3.24625349  | 5.59719324  | 2.75910425 |
| 5.72548342  | 11.29866314 | 2.69921899 |
| 0.73558354  | 11.29866314 | 2.69921899 |
| 5.02271366  | 8.84247589  | 2.64073300 |
| 0.03281343  | 8.84247589  | 2.64073300 |
| 7.16234589  | 1.15467191  | 2.58495903 |
| 2.17244577  | 1.15467191  | 2.58495903 |
| 5.69094276  | 6.28061676  | 2.47308970 |
| 0.70104283  | 6.28061676  | 2.47308970 |
| 4.72644854  | 4.52631235  | 0.98044425 |
| -0.26345146 | 4.52631235  | 0.98044425 |
| 8.98416233  | 2.08401227  | 0.94984233 |
| 3.99426270  | 2.08401227  | 0.94984233 |
| 7.49692297  | 12.16127491 | 0.88189071 |
| 2.50702286  | 12.16127491 | 0.88189071 |
| 8.92881203  | 7.14167833  | 0.77916235 |
| 3.93891239  | 7.14167833  | 0.77916235 |
| 8.23179626  | 9.65808487  | 0.74752367 |
| 3.24189639  | 9.65808487  | 0.74752367 |
| 6.50168800  | 2.71004343  | 0.73384589 |
| 1.51178777  | 2.71004343  | 0.73384589 |
| 5.78449345  | 0.24636792  | 0.66762453 |
| 0.79459333  | 0.24636792  | 0.66762453 |
| 6.40908241  | 7.83185196  | 0.60482943 |
| 1.41918242  | 7.83185196  | 0.60482943 |
| 7.18588972  | 5.31081581  | 0.60368013 |
| 2.19598985  | 5.31081581  | 0.60368013 |
| 5.68450737  | 10.28863907 | 0.50651002 |
| 0.69460732  | 10.28863907 | 0.50651002 |

# O

1.000000000000

|             |             |             |    |
|-------------|-------------|-------------|----|
| 9.97980000  | 0.00000000  | 0.00000000  |    |
| -0.76395804 | 12.66177393 | 0.00000000  |    |
| 0.00000004  | 0.00000004  | 19.64040000 |    |
| H           | C           | O           | Fe |
| 1           | 41          | 5           | 80 |

Cart

|             |             |            |
|-------------|-------------|------------|
| 6.62754039  | 7.18902823  | 9.29724976 |
| 6.73748738  | 7.30696537  | 8.20918209 |
| 4.60638555  | 2.59789053  | 8.22980420 |
| 9.61711950  | 2.63314244  | 8.22344251 |
| 4.18049585  | 9.26779288  | 7.37673075 |
| 1.82917372  | 7.40553227  | 8.39536137 |
| 1.00777729  | 11.17986684 | 8.44938759 |
| 9.13000929  | 9.28934973  | 7.36753737 |
| 2.19603830  | 4.25936709  | 7.19903196 |
| 7.17711398  | 4.25421547  | 7.19876489 |
| 3.42982618  | 11.94876332 | 7.16035870 |
| 8.49671763  | 11.97728899 | 7.13098315 |
| -0.35271662 | 6.74660158  | 6.28759717 |
| 4.64525038  | 6.72264955  | 6.24684422 |
| 1.74083655  | 1.63427961  | 6.16343725 |
| 6.72949204  | 1.59687945  | 6.17578114 |
| 2.15976232  | 8.28045523  | 5.58543557 |
| 7.14620353  | 8.28203782  | 5.54582007 |
| 9.19334018  | 3.12721885  | 5.29163192 |
| 4.20590114  | 3.13017779  | 5.29870537 |
| 4.66379897  | 10.78843384 | 4.24869424 |
| -0.32207598 | 10.79479042 | 4.26257908 |
| 6.71823271  | 5.67814422  | 4.00972823 |
| 1.72681403  | 5.68541311  | 4.01330460 |
| 7.17402746  | 12.34816129 | 3.64309508 |
| 2.19154383  | 12.34786176 | 3.63959361 |
| 9.22264347  | 7.19913806  | 3.32890013 |
| 4.23091034  | 7.20032362  | 3.31784055 |
| 5.47292232  | 2.23055553  | 2.34193015 |
| 0.48302215  | 2.23055553  | 2.34193015 |
| 6.73540354  | 9.72874641  | 2.00704742 |
| 1.74550355  | 9.72874641  | 2.00704742 |
| 7.98876715  | 3.77819967  | 1.47019899 |
| 2.99886727  | 3.77819967  | 1.47019899 |
| 9.21347809  | 11.29064846 | 1.28800344 |
| 4.22357798  | 11.29064846 | 1.28800344 |
| 5.52626467  | 6.13002825  | 0.45987183 |
| 0.53636485  | 6.13002825  | 0.45987183 |

|             |             |            |
|-------------|-------------|------------|
| 7.45328903  | 1.12937152  | 0.40848067 |
| 2.46338916  | 1.12937152  | 0.40848067 |
| 4.75647831  | 8.73880577  | 0.18583304 |
| -0.23342146 | 8.73880577  | 0.18583304 |
| 1.23967473  | 11.26166822 | 9.61167739 |
| 4.75723908  | 2.42324282  | 9.40134839 |
| 9.77129407  | 2.45695713  | 9.39428311 |
| 1.56690921  | 7.17710874  | 9.53756644 |
| 6.23899810  | 11.32005927 | 8.24477679 |
| 2.51391472  | 10.26116670 | 7.17406491 |
| 0.02700029  | 10.90070057 | 6.95174803 |
| 3.16086949  | 7.75323008  | 7.12263724 |
| 8.14724545  | 7.77162947  | 7.09945562 |
| 0.67909789  | 12.41440704 | 4.89989920 |
| 7.53521528  | 0.09888577  | 7.12622896 |
| 3.86271010  | 5.16719945  | 7.02491347 |
| 8.84397559  | 5.17370907  | 7.02885456 |
| 3.20904494  | 2.72043558  | 6.92332561 |
| 8.19621374  | 2.71224689  | 6.92624187 |
| 0.68209010  | 8.29769818  | 6.95224696 |
| 5.67183997  | 8.25617281  | 6.94901138 |
| 4.95248718  | 10.91645755 | 7.02178598 |
| 7.52349784  | 10.32339653 | 7.25324955 |
| 1.36339563  | 5.88899711  | 6.79982418 |
| 6.35328176  | 5.90508936  | 6.89908383 |
| 0.69200313  | 3.29154491  | 6.72887999 |
| 5.68292563  | 3.27135132  | 6.73910247 |
| 0.00886781  | 0.92698350  | 6.66135547 |
| 4.98858165  | 0.90047554  | 6.68234450 |
| 3.24488214  | 11.74764446 | 5.18703549 |
| 8.22772431  | 11.75756227 | 5.18606737 |
| 8.86362654  | 9.24989044  | 5.13388928 |
| 3.87706544  | 9.25625678  | 5.14749588 |
| 7.50293527  | 4.22232017  | 5.05250911 |
| 2.51952615  | 4.22707583  | 5.04381718 |
| 8.18787406  | 6.75601311  | 4.90058894 |
| 3.19381385  | 6.76496415  | 4.89617600 |
| 5.66544470  | 12.40169176 | 4.92262975 |
| 2.52518952  | 0.10189173  | 7.06307233 |
| 3.23703593  | 1.46366220  | 4.84472212 |
| 8.21383332  | 1.46506297  | 4.84378484 |
| 1.39135010  | 9.88959413  | 4.82423958 |
| 6.37618550  | 9.90229580  | 4.85024720 |
| 5.00834997  | 4.85740073  | 4.75331373 |

|             |             |            |
|-------------|-------------|------------|
| 0.01620789  | 4.85296632  | 4.74043574 |
| 0.71478312  | 7.28757935  | 4.70169695 |
| 5.71058953  | 7.28212409  | 4.69213684 |
| 5.75448705  | 2.18868070  | 4.51401342 |
| 0.76360117  | 2.19185514  | 4.50536615 |
| 8.92724419  | 3.16928101  | 3.13275409 |
| 3.93734455  | 3.16928101  | 3.13275409 |
| 9.65447807  | 0.51179242  | 2.92767382 |
| 4.66457796  | 0.51179242  | 2.92767382 |
| 8.19081593  | 10.75315189 | 2.92137337 |
| 3.20091629  | 10.75315189 | 2.92137337 |
| 7.52427816  | 8.16568470  | 2.89047265 |
| 2.53437829  | 8.16568470  | 2.89047265 |
| 6.46140337  | 3.88992119  | 2.81003308 |
| 1.47150326  | 3.88992119  | 2.81003308 |
| 8.23615360  | 5.59719324  | 2.75910425 |
| 3.24625349  | 5.59719324  | 2.75910425 |
| 5.72548342  | 11.29866314 | 2.69921899 |
| 0.73558354  | 11.29866314 | 2.69921899 |
| 5.02271366  | 8.84247589  | 2.64073300 |
| 0.03281343  | 8.84247589  | 2.64073300 |
| 7.16234589  | 1.15467191  | 2.58495903 |
| 2.17244577  | 1.15467191  | 2.58495903 |
| 5.69094276  | 6.28061676  | 2.47308970 |
| 0.70104283  | 6.28061676  | 2.47308970 |
| 4.72644854  | 4.52631235  | 0.98044425 |
| -0.26345146 | 4.52631235  | 0.98044425 |
| 8.98416233  | 2.08401227  | 0.94984233 |
| 3.99426270  | 2.08401227  | 0.94984233 |
| 7.49692297  | 12.16127491 | 0.88189071 |
| 2.50702286  | 12.16127491 | 0.88189071 |
| 8.92881203  | 7.14167833  | 0.77916235 |
| 3.93891239  | 7.14167833  | 0.77916235 |
| 8.23179626  | 9.65808487  | 0.74752367 |
| 3.24189639  | 9.65808487  | 0.74752367 |
| 6.50168800  | 2.71004343  | 0.73384589 |
| 1.51178777  | 2.71004343  | 0.73384589 |
| 5.78449345  | 0.24636792  | 0.66762453 |
| 0.79459333  | 0.24636792  | 0.66762453 |
| 6.40908241  | 7.83185196  | 0.60482943 |
| 1.41918242  | 7.83185196  | 0.60482943 |
| 7.18588972  | 5.31081581  | 0.60368013 |
| 2.19598985  | 5.31081581  | 0.60368013 |
| 5.68450737  | 10.28863907 | 0.50651002 |

0.69460732 10.28863907 0.50651002

# CH(state1)

1.000000000000

9.97980000 0.00000000 0.00000000  
-0.76395804 12.66177393 0.00000000  
0.00000004 0.00000004 19.64040000

H C O Fe  
2 41 4 80

Cart

6.63798469 7.20613877 9.30233364  
6.22408752 11.30173483 7.96766998  
6.75509172 7.33051952 8.21532413  
4.61251780 2.63667564 8.23247778  
9.61135845 2.63545473 8.22366671  
4.19214301 9.27868297 7.37638513  
1.80129628 7.51841502 8.40442625  
0.97825650 11.26286927 8.48185858  
9.14892456 9.29260758 7.36665118  
2.19282911 4.26049209 7.19964290  
7.17516433 4.27001915 7.19689574  
3.45782497 11.95117950 7.16816420  
8.42058191 11.95660634 7.18248979  
-0.34059835 6.75293292 6.28503341  
4.65148363 6.73131630 6.25665061  
1.73706304 1.62202704 6.17805212  
6.72939635 1.62765544 6.17259496  
2.16852549 8.28555473 5.58512049  
7.16231271 8.29903756 5.54638746  
9.19462350 3.13806404 5.29577301  
4.20336824 3.13441047 5.29866097  
4.66810383 10.80907183 4.26397603  
-0.31868217 10.81060345 4.26054746  
6.71991090 5.68978403 4.00976118  
1.72832166 5.69113883 4.01242428  
7.17915896 12.34866726 3.63684216  
2.18851357 12.34994283 3.64179340  
9.22494995 7.20077951 3.32749063  
4.23322070 7.20217603 3.32299880  
5.47292232 2.23055553 2.34193015  
0.48302215 2.23055553 2.34193015  
6.73540354 9.72874641 2.00704742  
1.74550355 9.72874641 2.00704742  
7.98876715 3.77819967 1.47019899



|             |             |            |
|-------------|-------------|------------|
| 2.99886727  | 3.77819967  | 1.47019899 |
| 9.21347809  | 11.29064846 | 1.28800344 |
| 4.22357798  | 11.29064846 | 1.28800344 |
| 5.52626467  | 6.13002825  | 0.45987183 |
| 0.53636485  | 6.13002825  | 0.45987183 |
| 7.45328903  | 1.12937152  | 0.40848067 |
| 2.46338916  | 1.12937152  | 0.40848067 |
| 4.75647831  | 8.73880577  | 0.18583304 |
| -0.23342146 | 8.73880577  | 0.18583304 |
| 1.22782551  | 11.34892962 | 9.64021925 |
| 4.74737952  | 2.47673712  | 9.40810582 |
| 9.74566406  | 2.46765193  | 9.39915247 |
| 1.58261060  | 7.30244763  | 9.55852331 |
| 2.54313793  | 10.27878311 | 7.19520878 |
| 0.00380219  | 10.93142440 | 6.99550158 |
| 3.16857573  | 7.77205151  | 7.12224325 |
| 8.16047106  | 7.78190819  | 7.09854517 |
| 0.68179461  | 12.41213993 | 4.91620073 |
| 7.50170834  | 0.08510540  | 7.05861047 |
| 3.85975217  | 5.17203237  | 7.01987193 |
| 8.84474847  | 5.18237567  | 7.03156088 |
| 3.20741068  | 2.72205223  | 6.92309498 |
| 8.19566081  | 2.72883819  | 6.92103655 |
| 0.69130676  | 8.30769748  | 6.93963482 |
| 5.69261047  | 8.28768676  | 6.95920706 |
| 4.99425825  | 10.90476599 | 6.90002690 |
| 7.50318652  | 10.28780498 | 7.17258452 |
| 1.36900708  | 5.89473358  | 6.79932034 |
| 6.35834098  | 5.92803846  | 6.90343119 |
| 0.69418008  | 3.28226220  | 6.73419836 |
| 5.68103372  | 3.28693980  | 6.74097743 |
| 0.00106129  | 0.89926037  | 6.68645682 |
| 5.00524890  | 0.89661962  | 6.68865066 |
| 3.23948979  | 11.76525550 | 5.18339606 |
| 8.22923360  | 11.76763336 | 5.18513050 |
| 8.88441459  | 9.25270476  | 5.11048696 |
| 3.87485832  | 9.24846519  | 5.10820115 |
| 7.50292717  | 4.23381159  | 5.04737136 |
| 2.51788710  | 4.23109422  | 5.04254571 |
| 8.19459480  | 6.76190654  | 4.90101685 |
| 3.19946414  | 6.76236621  | 4.90252326 |
| 5.66855148  | 12.42359898 | 4.89166077 |
| 2.53890169  | 0.09755682  | 7.07631299 |
| 3.23202385  | 1.46729518  | 4.84777453 |

|             |             |            |
|-------------|-------------|------------|
| 8.22070217  | 1.47398982  | 4.84393681 |
| 1.39744574  | 9.90686126  | 4.84832837 |
| 6.38484774  | 9.89907849  | 4.81884548 |
| 5.00938448  | 4.86342162  | 4.75315868 |
| 0.01957058  | 4.85809723  | 4.74624366 |
| 0.72304843  | 7.29368767  | 4.69669270 |
| 5.71522143  | 7.29431508  | 4.69769979 |
| 5.75009291  | 2.19530798  | 4.51561155 |
| 0.76086093  | 2.18793099  | 4.51447329 |
| 8.92724419  | 3.16928101  | 3.13275409 |
| 3.93734455  | 3.16928101  | 3.13275409 |
| 9.65447807  | 0.51179242  | 2.92767382 |
| 4.66457796  | 0.51179242  | 2.92767382 |
| 8.19081593  | 10.75315189 | 2.92137337 |
| 3.20091629  | 10.75315189 | 2.92137337 |
| 7.52427816  | 8.16568470  | 2.89047265 |
| 2.53437829  | 8.16568470  | 2.89047265 |
| 6.46140337  | 3.88992119  | 2.81003308 |
| 1.47150326  | 3.88992119  | 2.81003308 |
| 8.23615360  | 5.59719324  | 2.75910425 |
| 3.24625349  | 5.59719324  | 2.75910425 |
| 5.72548342  | 11.29866314 | 2.69921899 |
| 0.73558354  | 11.29866314 | 2.69921899 |
| 5.02271366  | 8.84247589  | 2.64073300 |
| 0.03281343  | 8.84247589  | 2.64073300 |
| 7.16234589  | 1.15467191  | 2.58495903 |
| 2.17244577  | 1.15467191  | 2.58495903 |
| 5.69094276  | 6.28061676  | 2.47308970 |
| 0.70104283  | 6.28061676  | 2.47308970 |
| 4.72644854  | 4.52631235  | 0.98044425 |
| -0.26345146 | 4.52631235  | 0.98044425 |
| 8.98416233  | 2.08401227  | 0.94984233 |
| 3.99426270  | 2.08401227  | 0.94984233 |
| 7.49692297  | 12.16127491 | 0.88189071 |
| 2.50702286  | 12.16127491 | 0.88189071 |
| 8.92881203  | 7.14167833  | 0.77916235 |
| 3.93891239  | 7.14167833  | 0.77916235 |
| 8.23179626  | 9.65808487  | 0.74752367 |
| 3.24189639  | 9.65808487  | 0.74752367 |
| 6.50168800  | 2.71004343  | 0.73384589 |
| 1.51178777  | 2.71004343  | 0.73384589 |
| 5.78449345  | 0.24636792  | 0.66762453 |
| 0.79459333  | 0.24636792  | 0.66762453 |
| 6.40908241  | 7.83185196  | 0.60482943 |

|            |             |            |
|------------|-------------|------------|
| 1.41918242 | 7.83185196  | 0.60482943 |
| 7.18588972 | 5.31081581  | 0.60368013 |
| 2.19598985 | 5.31081581  | 0.60368013 |
| 5.68450737 | 10.28863907 | 0.50651002 |
| 0.69460732 | 10.28863907 | 0.50651002 |

# CH(state2)

1.000000000000

|             |             |             |    |
|-------------|-------------|-------------|----|
| 9.97980000  | 0.00000000  | 0.00000000  |    |
| -0.76395804 | 12.66177393 | 0.00000000  |    |
| 0.00000004  | 0.00000004  | 19.64040000 |    |
| H           | C           | O           | Fe |
| 2           | 41          | 4           | 80 |

Cart

|             |             |            |
|-------------|-------------|------------|
| 1.12278518  | 11.24639723 | 9.35608445 |
| 6.22067992  | 11.29734132 | 7.97214372 |
| 1.18090383  | 11.26927242 | 8.26019386 |
| 4.63127466  | 2.67096227  | 8.23147313 |
| 9.62246061  | 2.63825466  | 8.23266307 |
| 4.16209877  | 9.31311156  | 7.39758117 |
| 6.79756558  | 7.54444076  | 8.42367842 |
| 1.83088900  | 7.34545635  | 8.38504471 |
| 9.15299096  | 9.29482799  | 7.35713384 |
| 2.20196263  | 4.25873425  | 7.18423100 |
| 7.19525290  | 4.26405515  | 7.20027031 |
| 3.50896628  | 11.97679430 | 7.13692639 |
| 8.42659601  | 11.94629762 | 7.16981103 |
| -0.33777036 | 6.76525534  | 6.30349625 |
| 4.64739271  | 6.77529870  | 6.30869497 |
| 1.75218080  | 1.57609218  | 6.20085667 |
| 6.74180849  | 1.63101769  | 6.17084278 |
| 2.16309080  | 8.29232759  | 5.59684995 |
| 7.15313806  | 8.27971865  | 5.58448498 |
| 9.20267048  | 3.13639748  | 5.30293183 |
| 4.21012996  | 3.13201596  | 5.29741792 |
| 4.67344350  | 10.80178487 | 4.26491123 |
| -0.32053436 | 10.80435124 | 4.27011201 |
| 6.72068465  | 5.69115261  | 4.01373877 |
| 1.73279352  | 5.69589076  | 4.01323331 |
| 7.18004671  | 12.34974669 | 3.63150717 |
| 2.18855787  | 12.34952413 | 3.64105947 |
| 9.22831010  | 7.20145790  | 3.33603409 |
| 4.23693029  | 7.20149493  | 3.33709584 |

|             |             |            |
|-------------|-------------|------------|
| 5.47292232  | 2.23055553  | 2.34193015 |
| 0.48302215  | 2.23055553  | 2.34193015 |
| 6.73540354  | 9.72874641  | 2.00704742 |
| 1.74550355  | 9.72874641  | 2.00704742 |
| 7.98876715  | 3.77819967  | 1.47019899 |
| 2.99886727  | 3.77819967  | 1.47019899 |
| 9.21347809  | 11.29064846 | 1.28800344 |
| 4.22357798  | 11.29064846 | 1.28800344 |
| 5.52626467  | 6.13002825  | 0.45987183 |
| 0.53636485  | 6.13002825  | 0.45987183 |
| 7.45328903  | 1.12937152  | 0.40848067 |
| 2.46338916  | 1.12937152  | 0.40848067 |
| 4.75647831  | 8.73880577  | 0.18583304 |
| -0.23342146 | 8.73880577  | 0.18583304 |
| 1.58561369  | 7.09835966  | 9.52797254 |
| 4.75649615  | 2.52480922  | 9.40969683 |
| 9.77055682  | 2.48349335  | 9.40735486 |
| 6.56703976  | 7.32068517  | 9.57235733 |
| 2.52336442  | 10.34555238 | 7.25435165 |
| -0.01721480 | 10.90519579 | 6.92020789 |
| 3.17105037  | 7.79962970  | 7.13389308 |
| 8.14881517  | 7.78056462  | 7.12763706 |
| 0.69043108  | 12.41353858 | 4.91633121 |
| 7.51001031  | 0.08645830  | 7.05724965 |
| 3.87375320  | 5.16789332  | 6.99383284 |
| 8.86087653  | 5.16806797  | 6.99833579 |
| 3.21068919  | 2.71016386  | 6.92264247 |
| 8.21128463  | 2.72592752  | 6.92802882 |
| 0.69113695  | 8.29735845  | 6.95951703 |
| 5.68581857  | 8.32800483  | 6.95464436 |
| 5.00869344  | 10.89768024 | 6.87667689 |
| 7.49723443  | 10.28312278 | 7.17216879 |
| 1.37719952  | 5.89738975  | 6.80695963 |
| 6.36594263  | 5.89604020  | 6.78590825 |
| 0.70722506  | 3.27160273  | 6.73158930 |
| 5.69167990  | 3.29381387  | 6.73654388 |
| 0.00593203  | 0.89526769  | 6.70215285 |
| 5.01660118  | 0.91615586  | 6.66383894 |
| 3.24972258  | 11.76367884 | 5.17364125 |
| 8.22776137  | 11.77063382 | 5.17667309 |
| 8.87906257  | 9.23209332  | 5.10995113 |
| 3.88372932  | 9.23938522  | 5.09880208 |
| 7.51162232  | 4.22614299  | 5.03885268 |
| 2.51988937  | 4.22795809  | 5.04167329 |

|             |             |            |
|-------------|-------------|------------|
| 8.19556892  | 6.75608046  | 4.91304969 |
| 3.20489478  | 6.76125635  | 4.91953143 |
| 5.67291970  | 12.42619757 | 4.88496023 |
| 2.54998766  | 0.03221841  | 7.11676488 |
| 3.22903469  | 1.47202247  | 4.83990239 |
| 8.22985728  | 1.47533905  | 4.84800416 |
| 1.40201738  | 9.89966382  | 4.84124255 |
| 6.39331817  | 9.88869412  | 4.81883934 |
| 5.01255518  | 4.85118713  | 4.73274255 |
| 0.02700394  | 4.85356491  | 4.73991401 |
| 0.72456597  | 7.28952974  | 4.70762010 |
| 5.70944195  | 7.28677876  | 4.70610426 |
| 5.75771270  | 2.19719940  | 4.51245129 |
| 0.76811634  | 2.18440225  | 4.52010685 |
| 8.92724419  | 3.16928101  | 3.13275409 |
| 3.93734455  | 3.16928101  | 3.13275409 |
| 9.65447807  | 0.51179242  | 2.92767382 |
| 4.66457796  | 0.51179242  | 2.92767382 |
| 8.19081593  | 10.75315189 | 2.92137337 |
| 3.20091629  | 10.75315189 | 2.92137337 |
| 7.52427816  | 8.16568470  | 2.89047265 |
| 2.53437829  | 8.16568470  | 2.89047265 |
| 6.46140337  | 3.88992119  | 2.81003308 |
| 1.47150326  | 3.88992119  | 2.81003308 |
| 8.23615360  | 5.59719324  | 2.75910425 |
| 3.24625349  | 5.59719324  | 2.75910425 |
| 5.72548342  | 11.29866314 | 2.69921899 |
| 0.73558354  | 11.29866314 | 2.69921899 |
| 5.02271366  | 8.84247589  | 2.64073300 |
| 0.03281343  | 8.84247589  | 2.64073300 |
| 7.16234589  | 1.15467191  | 2.58495903 |
| 2.17244577  | 1.15467191  | 2.58495903 |
| 5.69094276  | 6.28061676  | 2.47308970 |
| 0.70104283  | 6.28061676  | 2.47308970 |
| 4.72644854  | 4.52631235  | 0.98044425 |
| -0.26345146 | 4.52631235  | 0.98044425 |
| 8.98416233  | 2.08401227  | 0.94984233 |
| 3.99426270  | 2.08401227  | 0.94984233 |
| 7.49692297  | 12.16127491 | 0.88189071 |
| 2.50702286  | 12.16127491 | 0.88189071 |
| 8.92881203  | 7.14167833  | 0.77916235 |
| 3.93891239  | 7.14167833  | 0.77916235 |
| 8.23179626  | 9.65808487  | 0.74752367 |
| 3.24189639  | 9.65808487  | 0.74752367 |

|            |             |            |
|------------|-------------|------------|
| 6.50168800 | 2.71004343  | 0.73384589 |
| 1.51178777 | 2.71004343  | 0.73384589 |
| 5.78449345 | 0.24636792  | 0.66762453 |
| 0.79459333 | 0.24636792  | 0.66762453 |
| 6.40908241 | 7.83185196  | 0.60482943 |
| 1.41918242 | 7.83185196  | 0.60482943 |
| 7.18588972 | 5.31081581  | 0.60368013 |
| 2.19598985 | 5.31081581  | 0.60368013 |
| 5.68450737 | 10.28863907 | 0.50651002 |
| 0.69460732 | 10.28863907 | 0.50651002 |

# TS for C<sub>cv</sub>+CH->CCH<sub>cv</sub>

1.000000000000

|             |             |             |    |
|-------------|-------------|-------------|----|
| 9.97980000  | 0.00000000  | 0.00000000  |    |
| -0.76395804 | 12.66177393 | 0.00000000  |    |
| 0.00000004  | 0.00000004  | 19.64040000 |    |
| H           | C           | O           | Fe |
| 2           | 41          | 4           | 80 |

Cart

|             |             |            |
|-------------|-------------|------------|
| 0.87932232  | 9.98739857  | 9.27282617 |
| 6.22777051  | 11.33909505 | 7.99011660 |
| 1.03969492  | 10.03231360 | 8.18941056 |
| 4.60518449  | 2.64170892  | 8.23127289 |
| 9.60675203  | 2.63138054  | 8.22265624 |
| 4.20126944  | 9.29794516  | 7.40833830 |
| 6.76970158  | 7.56229962  | 8.41618906 |
| 1.87658999  | 7.27314953  | 8.39056121 |
| 9.10959613  | 9.29892302  | 7.31535683 |
| 2.18251296  | 4.27782733  | 7.18190902 |
| 7.18485834  | 4.25790785  | 7.20400297 |
| 3.41369361  | 11.92574788 | 7.19505995 |
| 8.46375829  | 11.95879802 | 7.17376423 |
| -0.32466620 | 6.77747214  | 6.30395809 |
| 4.65894081  | 6.75822723  | 6.30118270 |
| 1.74017930  | 1.62789841  | 6.16653415 |
| 6.72326773  | 1.61562802  | 6.17973452 |
| 2.17611737  | 8.29485178  | 5.62202493 |
| 7.15348706  | 8.27289410  | 5.56732158 |
| 9.19562500  | 3.13837814  | 5.29541999 |
| 4.20455798  | 3.13934025  | 5.30274832 |
| 4.67096181  | 10.80099999 | 4.26357853 |
| -0.32260470 | 10.81881715 | 4.27517576 |
| 6.72177413  | 5.68909342  | 4.00916326 |

|             |             |            |
|-------------|-------------|------------|
| 1.73204301  | 5.70560912  | 4.01603959 |
| 7.17333441  | 12.34959684 | 3.62856874 |
| 2.19379317  | 12.34880377 | 3.63751617 |
| 9.23101059  | 7.20179478  | 3.33494885 |
| 4.23552802  | 7.20371831  | 3.33654523 |
| 5.47292232  | 2.23055553  | 2.34193015 |
| 0.48302215  | 2.23055553  | 2.34193015 |
| 6.73540354  | 9.72874641  | 2.00704742 |
| 1.74550355  | 9.72874641  | 2.00704742 |
| 7.98876715  | 3.77819967  | 1.47019899 |
| 2.99886727  | 3.77819967  | 1.47019899 |
| 9.21347809  | 11.29064846 | 1.28800344 |
| 4.22357798  | 11.29064846 | 1.28800344 |
| 5.52626467  | 6.13002825  | 0.45987183 |
| 0.53636485  | 6.13002825  | 0.45987183 |
| 7.45328903  | 1.12937152  | 0.40848067 |
| 2.46338916  | 1.12937152  | 0.40848067 |
| 4.75647831  | 8.73880577  | 0.18583304 |
| -0.23342146 | 8.73880577  | 0.18583304 |
| 1.64498815  | 7.06220437  | 9.54300826 |
| 4.72664891  | 2.48550088  | 9.41012194 |
| 9.74350276  | 2.46466148  | 9.39751157 |
| 6.59513960  | 7.33306722  | 9.57313638 |
| 2.55860885  | 10.25215765 | 7.15530737 |
| 0.00625198  | 10.90758775 | 6.86336533 |
| 3.21577955  | 7.76776701  | 7.14433637 |
| 8.15332189  | 7.77839795  | 7.12094659 |
| 0.68926017  | 12.42604874 | 4.89024814 |
| 7.52175661  | 0.09001505  | 7.06639393 |
| 3.86653119  | 5.16652669  | 7.00589315 |
| 8.84969879  | 5.18341540  | 6.99566685 |
| 3.20354757  | 2.73084399  | 6.92131959 |
| 8.19682318  | 2.72613787  | 6.92113218 |
| 0.73529696  | 8.38238350  | 7.00942882 |
| 5.69815154  | 8.31454393  | 6.94186297 |
| 4.99319190  | 10.92250736 | 6.91587556 |
| 7.49688380  | 10.31208976 | 7.17777246 |
| 1.38066444  | 5.93597386  | 6.81427533 |
| 6.36820039  | 5.88877822  | 6.78371540 |
| 0.69012613  | 3.28712151  | 6.72858736 |
| 5.68485405  | 3.27262173  | 6.74083899 |
| 0.01250212  | 0.90384419  | 6.67711100 |
| 4.99457758  | 0.87517847  | 6.71276683 |
| 3.24355818  | 11.76055662 | 5.18305360 |

|             |             |            |
|-------------|-------------|------------|
| 8.21643354  | 11.78108831 | 5.16767533 |
| 8.88144084  | 9.24044604  | 5.10823973 |
| 3.89146070  | 9.23240541  | 5.09429371 |
| 7.50659888  | 4.22880737  | 5.04066544 |
| 2.51350331  | 4.23720655  | 5.04353502 |
| 8.19812018  | 6.75663148  | 4.91101591 |
| 3.19833494  | 6.76582501  | 4.91789596 |
| 5.66509763  | 12.42122502 | 4.89822307 |
| 2.50969236  | 0.08206732  | 7.04399171 |
| 3.23342841  | 1.47999872  | 4.84195438 |
| 8.21300685  | 1.47849093  | 4.84291367 |
| 1.40629578  | 9.90044537  | 4.81393856 |
| 6.39515032  | 9.89875761  | 4.83806081 |
| 5.01139823  | 4.85260704  | 4.73980703 |
| 0.02537300  | 4.86097585  | 4.73849205 |
| 0.72445605  | 7.30122404  | 4.72074968 |
| 5.70932420  | 7.28237823  | 4.69953697 |
| 5.74701859  | 2.18918564  | 4.51818459 |
| 0.75915969  | 2.19187124  | 4.50922646 |
| 8.92724419  | 3.16928101  | 3.13275409 |
| 3.93734455  | 3.16928101  | 3.13275409 |
| 9.65447807  | 0.51179242  | 2.92767382 |
| 4.66457796  | 0.51179242  | 2.92767382 |
| 8.19081593  | 10.75315189 | 2.92137337 |
| 3.20091629  | 10.75315189 | 2.92137337 |
| 7.52427816  | 8.16568470  | 2.89047265 |
| 2.53437829  | 8.16568470  | 2.89047265 |
| 6.46140337  | 3.88992119  | 2.81003308 |
| 1.47150326  | 3.88992119  | 2.81003308 |
| 8.23615360  | 5.59719324  | 2.75910425 |
| 3.24625349  | 5.59719324  | 2.75910425 |
| 5.72548342  | 11.29866314 | 2.69921899 |
| 0.73558354  | 11.29866314 | 2.69921899 |
| 5.02271366  | 8.84247589  | 2.64073300 |
| 0.03281343  | 8.84247589  | 2.64073300 |
| 7.16234589  | 1.15467191  | 2.58495903 |
| 2.17244577  | 1.15467191  | 2.58495903 |
| 5.69094276  | 6.28061676  | 2.47308970 |
| 0.70104283  | 6.28061676  | 2.47308970 |
| 4.72644854  | 4.52631235  | 0.98044425 |
| -0.26345146 | 4.52631235  | 0.98044425 |
| 8.98416233  | 2.08401227  | 0.94984233 |
| 3.99426270  | 2.08401227  | 0.94984233 |
| 7.49692297  | 12.16127491 | 0.88189071 |



|            |             |            |
|------------|-------------|------------|
| 2.50702286 | 12.16127491 | 0.88189071 |
| 8.92881203 | 7.14167833  | 0.77916235 |
| 3.93891239 | 7.14167833  | 0.77916235 |
| 8.23179626 | 9.65808487  | 0.74752367 |
| 3.24189639 | 9.65808487  | 0.74752367 |
| 6.50168800 | 2.71004343  | 0.73384589 |
| 1.51178777 | 2.71004343  | 0.73384589 |
| 5.78449345 | 0.24636792  | 0.66762453 |
| 0.79459333 | 0.24636792  | 0.66762453 |
| 6.40908241 | 7.83185196  | 0.60482943 |
| 1.41918242 | 7.83185196  | 0.60482943 |
| 7.18588972 | 5.31081581  | 0.60368013 |
| 2.19598985 | 5.31081581  | 0.60368013 |
| 5.68450737 | 10.28863907 | 0.50651002 |
| 0.69460732 | 10.28863907 | 0.50651002 |

# CCH<sub>Cv</sub>

1.000000000000

|             |             |             |    |
|-------------|-------------|-------------|----|
| 9.97980000  | 0.00000000  | 0.00000000  |    |
| -0.76395804 | 12.66177393 | 0.00000000  |    |
| 0.00000004  | 0.00000004  | 19.64040000 |    |
| H           | C           | O           | Fe |
| 2           | 41          | 4           | 80 |

Cart

|             |             |            |
|-------------|-------------|------------|
| 0.79208888  | 9.92171047  | 9.35698518 |
| 6.23466613  | 11.27268760 | 7.94018290 |
| 0.52998117  | 9.78882421  | 8.30172204 |
| 4.60162151  | 2.63521566  | 8.23155537 |
| 9.60194873  | 2.62753401  | 8.21555897 |
| 4.15660586  | 9.26866340  | 7.41855451 |
| 6.79671899  | 7.48694132  | 8.42034240 |
| 1.88562336  | 7.24344951  | 8.38567336 |
| 9.27670145  | 9.33666070  | 7.78933562 |
| 2.19588811  | 4.24586641  | 7.18429473 |
| 7.17574144  | 4.26551520  | 7.19481085 |
| 3.35718375  | 11.90146956 | 7.22118030 |
| 8.44835161  | 11.92626325 | 7.11873101 |
| -0.33271160 | 6.79797009  | 6.31546516 |
| 4.67715621  | 6.73655917  | 6.29514971 |
| 1.73112850  | 1.62531052  | 6.14293058 |
| 6.71082853  | 1.59127807  | 6.20622768 |
| 2.16120252  | 8.27783956  | 5.63715668 |
| 7.19478680  | 8.34201523  | 5.67586795 |

|             |             |            |
|-------------|-------------|------------|
| 9.18370845  | 3.13475249  | 5.29122679 |
| 4.20765826  | 3.14595187  | 5.30174824 |
| 4.65825504  | 10.79417186 | 4.26508113 |
| -0.30792255 | 10.84985776 | 4.31487637 |
| 6.72629546  | 5.71759573  | 4.01584387 |
| 1.73459414  | 5.70223072  | 4.01751251 |
| 7.16011538  | 12.35119493 | 3.62938481 |
| 2.20122095  | 12.34956428 | 3.63801344 |
| 9.22880762  | 7.21063740  | 3.35322967 |
| 4.23983650  | 7.20272275  | 3.34221645 |
| 5.47292232  | 2.23055553  | 2.34193015 |
| 0.48302215  | 2.23055553  | 2.34193015 |
| 6.73540354  | 9.72874641  | 2.00704742 |
| 1.74550355  | 9.72874641  | 2.00704742 |
| 7.98876715  | 3.77819967  | 1.47019899 |
| 2.99886727  | 3.77819967  | 1.47019899 |
| 9.21347809  | 11.29064846 | 1.28800344 |
| 4.22357798  | 11.29064846 | 1.28800344 |
| 5.52626467  | 6.13002825  | 0.45987183 |
| 0.53636485  | 6.13002825  | 0.45987183 |
| 7.45328903  | 1.12937152  | 0.40848067 |
| 2.46338916  | 1.12937152  | 0.40848067 |
| 4.75647831  | 8.73880577  | 0.18583304 |
| -0.23342146 | 8.73880577  | 0.18583304 |
| 1.65099363  | 6.96189016  | 9.52440132 |
| 4.72248767  | 2.48745295  | 9.41054824 |
| 9.72439407  | 2.45996853  | 9.39051821 |
| 6.61749301  | 7.26960898  | 9.58114101 |
| 2.41645420  | 10.20751473 | 7.22267945 |
| 0.01366280  | 10.90991155 | 6.71618439 |
| 3.21711902  | 7.73361031  | 7.14649560 |
| 8.22136693  | 7.84996790  | 7.19468444 |
| 0.69016215  | 12.46153553 | 4.86187685 |
| 7.50681559  | 0.04561118  | 7.06194698 |
| 3.87226932  | 5.15172613  | 7.00623485 |
| 8.86357513  | 5.16790440  | 6.98186032 |
| 3.20540557  | 2.71316503  | 6.91608194 |
| 8.18082266  | 2.72165281  | 6.91648293 |
| 0.74753396  | 8.26761008  | 7.00736638 |
| 5.70287998  | 8.31532447  | 6.98663489 |
| 4.92008936  | 10.89668520 | 6.95245384 |
| 7.53631830  | 10.23728282 | 7.10632268 |
| 1.37094897  | 5.87099675  | 6.77670319 |
| 6.40453712  | 5.92759242  | 6.81325069 |

|             |             |            |
|-------------|-------------|------------|
| 0.68293843  | 3.27677521  | 6.72868413 |
| 5.68545046  | 3.26186643  | 6.74169757 |
| -0.00302836 | 0.89018353  | 6.66637181 |
| 4.97479643  | 0.84719007  | 6.72948615 |
| 3.21960118  | 11.73382212 | 5.20756622 |
| 8.20749649  | 11.78606331 | 5.14983586 |
| 8.86868718  | 9.21038410  | 4.97831906 |
| 3.87294409  | 9.23568896  | 5.11819687 |
| 7.50196193  | 4.24248012  | 5.03866382 |
| 2.51537655  | 4.22603176  | 5.03461648 |
| 8.18667253  | 6.77426682  | 4.95166952 |
| 3.20882200  | 6.76467108  | 4.91572814 |
| 5.64534859  | 12.40936186 | 4.91029074 |
| 2.47723266  | 0.07558529  | 7.03164003 |
| 3.24623199  | 1.47544343  | 4.83746587 |
| 8.19715459  | 1.47388055  | 4.84484467 |
| 1.40030041  | 9.86437785  | 4.77263279 |
| 6.38365322  | 9.89382310  | 4.81951824 |
| 5.02141191  | 4.87116196  | 4.75942424 |
| 0.02005373  | 4.85414094  | 4.73156069 |
| 0.72391047  | 7.29148568  | 4.71002104 |
| 5.72910266  | 7.32866106  | 4.71233887 |
| 5.74518331  | 2.18351251  | 4.52534275 |
| 0.75100893  | 2.19905429  | 4.50465792 |
| 8.92724419  | 3.16928101  | 3.13275409 |
| 3.93734455  | 3.16928101  | 3.13275409 |
| 9.65447807  | 0.51179242  | 2.92767382 |
| 4.66457796  | 0.51179242  | 2.92767382 |
| 8.19081593  | 10.75315189 | 2.92137337 |
| 3.20091629  | 10.75315189 | 2.92137337 |
| 7.52427816  | 8.16568470  | 2.89047265 |
| 2.53437829  | 8.16568470  | 2.89047265 |
| 6.46140337  | 3.88992119  | 2.81003308 |
| 1.47150326  | 3.88992119  | 2.81003308 |
| 8.23615360  | 5.59719324  | 2.75910425 |
| 3.24625349  | 5.59719324  | 2.75910425 |
| 5.72548342  | 11.29866314 | 2.69921899 |
| 0.73558354  | 11.29866314 | 2.69921899 |
| 5.02271366  | 8.84247589  | 2.64073300 |
| 0.03281343  | 8.84247589  | 2.64073300 |
| 7.16234589  | 1.15467191  | 2.58495903 |
| 2.17244577  | 1.15467191  | 2.58495903 |
| 5.69094276  | 6.28061676  | 2.47308970 |
| 0.70104283  | 6.28061676  | 2.47308970 |

|             |             |            |
|-------------|-------------|------------|
| 4.72644854  | 4.52631235  | 0.98044425 |
| -0.26345146 | 4.52631235  | 0.98044425 |
| 8.98416233  | 2.08401227  | 0.94984233 |
| 3.99426270  | 2.08401227  | 0.94984233 |
| 7.49692297  | 12.16127491 | 0.88189071 |
| 2.50702286  | 12.16127491 | 0.88189071 |
| 8.92881203  | 7.14167833  | 0.77916235 |
| 3.93891239  | 7.14167833  | 0.77916235 |
| 8.23179626  | 9.65808487  | 0.74752367 |
| 3.24189639  | 9.65808487  | 0.74752367 |
| 6.50168800  | 2.71004343  | 0.73384589 |
| 1.51178777  | 2.71004343  | 0.73384589 |
| 5.78449345  | 0.24636792  | 0.66762453 |
| 0.79459333  | 0.24636792  | 0.66762453 |
| 6.40908241  | 7.83185196  | 0.60482943 |
| 1.41918242  | 7.83185196  | 0.60482943 |
| 7.18588972  | 5.31081581  | 0.60368013 |
| 2.19598985  | 5.31081581  | 0.60368013 |
| 5.68450737  | 10.28863907 | 0.50651002 |
| 0.69460732  | 10.28863907 | 0.50651002 |

# TS for  $CCH_{cv}+H \rightarrow CCH_2_{cv}$

1.000000000000

|             |             |             |    |
|-------------|-------------|-------------|----|
| 9.97980000  | 0.00000000  | 0.00000000  |    |
| -0.76395804 | 12.66177393 | 0.00000000  |    |
| 0.00000004  | 0.00000004  | 19.64040000 |    |
| H           | C           | O           | Fe |
| 2           | 41          | 4           | 80 |

Cart

|             |             |            |
|-------------|-------------|------------|
| 0.67669779  | 9.59171537  | 9.51835202 |
| 0.88268140  | 10.97115964 | 8.23914614 |
| 0.39476443  | 9.66744891  | 8.46510248 |
| 4.60028639  | 2.61783101  | 8.22889348 |
| 9.59438331  | 2.58158734  | 8.21779884 |
| 4.18995560  | 9.25497262  | 7.39714567 |
| 6.81285761  | 7.36572568  | 8.39787228 |
| 2.41901139  | 7.09415359  | 8.64249067 |
| 9.17588707  | 9.28952031  | 7.84870687 |
| 2.18589205  | 4.22933399  | 7.18226553 |
| 7.18538983  | 4.25161093  | 7.19294800 |
| 3.40791803  | 11.89571523 | 7.19446189 |
| 8.37955441  | 11.88600778 | 7.17563563 |
| -0.33374101 | 6.78368368  | 6.32656428 |

|             |             |            |
|-------------|-------------|------------|
| 4.68574814  | 6.71986510  | 6.27454955 |
| 1.72788910  | 1.59594199  | 6.16165571 |
| 6.70983318  | 1.60675012  | 6.17799154 |
| 2.15579516  | 8.26121162  | 5.63337503 |
| 7.19354719  | 8.33790810  | 5.66533061 |
| 9.18815971  | 3.12790416  | 5.29422224 |
| 4.20431979  | 3.13157854  | 5.29759329 |
| 4.66032536  | 10.77726837 | 4.26556985 |
| -0.30995365 | 10.82043652 | 4.27511139 |
| 6.72668291  | 5.70461021  | 4.01663704 |
| 1.73368694  | 5.68938566  | 4.01617992 |
| 7.17583452  | 12.34615537 | 3.64011190 |
| 2.19297280  | 12.34480090 | 3.64575847 |
| 9.23122298  | 7.21064648  | 3.35672191 |
| 4.23955026  | 7.20272585  | 3.33832241 |
| 5.47292232  | 2.23055553  | 2.34193015 |
| 0.48302215  | 2.23055553  | 2.34193015 |
| 6.73540354  | 9.72874641  | 2.00704742 |
| 1.74550355  | 9.72874641  | 2.00704742 |
| 7.98876715  | 3.77819967  | 1.47019899 |
| 2.99886727  | 3.77819967  | 1.47019899 |
| 9.21347809  | 11.29064846 | 1.28800344 |
| 4.22357798  | 11.29064846 | 1.28800344 |
| 5.52626467  | 6.13002825  | 0.45987183 |
| 0.53636485  | 6.13002825  | 0.45987183 |
| 7.45328903  | 1.12937152  | 0.40848067 |
| 2.46338916  | 1.12937152  | 0.40848067 |
| 4.75647831  | 8.73880577  | 0.18583304 |
| -0.23342146 | 8.73880577  | 0.18583304 |
| 1.99844730  | 6.82445397  | 9.70747541 |
| 4.72442570  | 2.46460780  | 9.40750543 |
| 9.72133003  | 2.40700649  | 9.39343425 |
| 6.59185489  | 7.12370843  | 9.54749243 |
| 2.50414399  | 10.19676551 | 7.18145773 |
| -0.02595945 | 10.91674050 | 6.87906261 |
| 3.21834236  | 7.71100752  | 7.17229502 |
| 8.21135196  | 7.80192479  | 7.18228518 |
| 0.68303036  | 12.41417292 | 4.90295767 |
| 7.49058777  | 0.04864725  | 7.02893021 |
| 3.85880863  | 5.16412348  | 7.03022610 |
| 8.88028702  | 5.15196119  | 6.99033277 |
| 3.20243952  | 2.70230218  | 6.91704112 |
| 8.18871269  | 2.71053362  | 6.91711908 |
| 0.68078253  | 8.36103290  | 6.93812033 |

|             |             |            |
|-------------|-------------|------------|
| 5.72186477  | 8.29577097  | 6.98006105 |
| 4.98531578  | 10.88593675 | 6.89941905 |
| 7.50430913  | 10.17880134 | 7.03882689 |
| 1.38523439  | 5.87478260  | 6.76742238 |
| 6.40601351  | 5.90143939  | 6.80048070 |
| 0.68388370  | 3.24618648  | 6.73325552 |
| 5.68168092  | 3.25806966  | 6.73938205 |
| -0.00379090 | 0.84666397  | 6.70341719 |
| 4.98690008  | 0.84667705  | 6.71987196 |
| 3.23273644  | 11.73287131 | 5.19390351 |
| 8.22689069  | 11.75139531 | 5.17728613 |
| 8.88823467  | 9.20323765  | 4.99936755 |
| 3.87372447  | 9.21050627  | 5.15355314 |
| 7.50481207  | 4.23099075  | 5.04152839 |
| 2.51619278  | 4.22037046  | 5.04347601 |
| 8.18877792  | 6.76208060  | 4.94507754 |
| 3.20847510  | 6.75458448  | 4.91593627 |
| 5.65571561  | 12.40999213 | 4.89618278 |
| 2.49829126  | 0.05005563  | 7.04726592 |
| 3.23166240  | 1.46169682  | 4.83751849 |
| 8.20817285  | 1.46585382  | 4.84098241 |
| 1.39553374  | 9.88043759  | 4.81760462 |
| 6.38017969  | 9.87794451  | 4.78399980 |
| 5.01488648  | 4.86472001  | 4.76351775 |
| 0.02256009  | 4.84224582  | 4.72827324 |
| 0.72667441  | 7.27226752  | 4.71473425 |
| 5.73074755  | 7.31787339  | 4.70921056 |
| 5.74327024  | 2.18295372  | 4.51726849 |
| 0.75297877  | 2.17853308  | 4.51124865 |
| 8.92724419  | 3.16928101  | 3.13275409 |
| 3.93734455  | 3.16928101  | 3.13275409 |
| 9.65447807  | 0.51179242  | 2.92767382 |
| 4.66457796  | 0.51179242  | 2.92767382 |
| 8.19081593  | 10.75315189 | 2.92137337 |
| 3.20091629  | 10.75315189 | 2.92137337 |
| 7.52427816  | 8.16568470  | 2.89047265 |
| 2.53437829  | 8.16568470  | 2.89047265 |
| 6.46140337  | 3.88992119  | 2.81003308 |
| 1.47150326  | 3.88992119  | 2.81003308 |
| 8.23615360  | 5.59719324  | 2.75910425 |
| 3.24625349  | 5.59719324  | 2.75910425 |
| 5.72548342  | 11.29866314 | 2.69921899 |
| 0.73558354  | 11.29866314 | 2.69921899 |
| 5.02271366  | 8.84247589  | 2.64073300 |

|             |             |            |
|-------------|-------------|------------|
| 0.03281343  | 8.84247589  | 2.64073300 |
| 7.16234589  | 1.15467191  | 2.58495903 |
| 2.17244577  | 1.15467191  | 2.58495903 |
| 5.69094276  | 6.28061676  | 2.47308970 |
| 0.70104283  | 6.28061676  | 2.47308970 |
| 4.72644854  | 4.52631235  | 0.98044425 |
| -0.26345146 | 4.52631235  | 0.98044425 |
| 8.98416233  | 2.08401227  | 0.94984233 |
| 3.99426270  | 2.08401227  | 0.94984233 |
| 7.49692297  | 12.16127491 | 0.88189071 |
| 2.50702286  | 12.16127491 | 0.88189071 |
| 8.92881203  | 7.14167833  | 0.77916235 |
| 3.93891239  | 7.14167833  | 0.77916235 |
| 8.23179626  | 9.65808487  | 0.74752367 |
| 3.24189639  | 9.65808487  | 0.74752367 |
| 6.50168800  | 2.71004343  | 0.73384589 |
| 1.51178777  | 2.71004343  | 0.73384589 |
| 5.78449345  | 0.24636792  | 0.66762453 |
| 0.79459333  | 0.24636792  | 0.66762453 |
| 6.40908241  | 7.83185196  | 0.60482943 |
| 1.41918242  | 7.83185196  | 0.60482943 |
| 7.18588972  | 5.31081581  | 0.60368013 |
| 2.19598985  | 5.31081581  | 0.60368013 |
| 5.68450737  | 10.28863907 | 0.50651002 |
| 0.69460732  | 10.28863907 | 0.50651002 |

# CCH<sub>2</sub> cv

1.000000000000

|             |             |             |    |
|-------------|-------------|-------------|----|
| 9.97980000  | 0.00000000  | 0.00000000  |    |
| -0.76395804 | 12.66177393 | 0.00000000  |    |
| 0.00000004  | 0.00000004  | 19.64040000 |    |
| H           | C           | O           | Fe |
| 2           | 41          | 4           | 80 |

Cart

|             |             |            |
|-------------|-------------|------------|
| -0.00428979 | 8.36771208  | 9.67422330 |
| 0.66384395  | 10.04661482 | 9.32578431 |
| 0.09384119  | 9.18581328  | 8.95227136 |
| 4.60912664  | 2.65371586  | 8.23493271 |
| 9.60526721  | 2.58195758  | 8.21697063 |
| 4.20478827  | 9.27284729  | 7.38894486 |
| 6.83581667  | 7.43840556  | 8.40128808 |
| 2.49430499  | 7.05979148  | 8.66023823 |
| 9.12821898  | 9.31329499  | 7.91746292 |

|             |             |            |
|-------------|-------------|------------|
| 2.18831428  | 4.24957441  | 7.17438531 |
| 7.19371548  | 4.26632045  | 7.18949601 |
| 3.39776000  | 11.89722087 | 7.18890546 |
| 8.39372970  | 11.89386103 | 7.15192977 |
| -0.33065465 | 6.82095051  | 6.33301565 |
| 4.69036933  | 6.74339370  | 6.27979799 |
| 1.73163801  | 1.61896364  | 6.15832608 |
| 6.71555044  | 1.62301894  | 6.18118300 |
| 2.13790421  | 8.29572837  | 5.69815885 |
| 7.19237872  | 8.34418188  | 5.64406861 |
| 9.19039336  | 3.14313840  | 5.29581605 |
| 4.20627682  | 3.13997114  | 5.30224071 |
| 4.66672784  | 10.79287934 | 4.26761544 |
| -0.30977439 | 10.83619500 | 4.29087011 |
| 6.72262020  | 5.70464404  | 4.01287998 |
| 1.73519283  | 5.70703499  | 4.02176179 |
| 7.16980422  | 12.35154233 | 3.63120324 |
| 2.19410920  | 12.34798345 | 3.63525005 |
| 9.23472642  | 7.21264344  | 3.36128175 |
| 4.24069520  | 7.20597782  | 3.34546830 |
| 5.47292232  | 2.23055553  | 2.34193015 |
| 0.48302215  | 2.23055553  | 2.34193015 |
| 6.73540354  | 9.72874641  | 2.00704742 |
| 1.74550355  | 9.72874641  | 2.00704742 |
| 7.98876715  | 3.77819967  | 1.47019899 |
| 2.99886727  | 3.77819967  | 1.47019899 |
| 9.21347809  | 11.29064846 | 1.28800344 |
| 4.22357798  | 11.29064846 | 1.28800344 |
| 5.52626467  | 6.13002825  | 0.45987183 |
| 0.53636485  | 6.13002825  | 0.45987183 |
| 7.45328903  | 1.12937152  | 0.40848067 |
| 2.46338916  | 1.12937152  | 0.40848067 |
| 4.75647831  | 8.73880577  | 0.18583304 |
| -0.23342146 | 8.73880577  | 0.18583304 |
| 2.12176353  | 6.71150297  | 9.71972690 |
| 4.72705029  | 2.51015758  | 9.41543069 |
| 9.74105693  | 2.40805684  | 9.39182178 |
| 6.62939659  | 7.16421226  | 9.54700065 |
| 2.51794449  | 10.18641689 | 7.07886051 |
| -0.01766709 | 10.88193471 | 6.74324534 |
| 3.23170436  | 7.72765756  | 7.17711467 |
| 8.19803788  | 7.81584402  | 7.14235600 |
| 0.68349751  | 12.43780158 | 4.87964108 |
| 7.50099166  | 0.06465221  | 7.01994279 |



|            |             |            |
|------------|-------------|------------|
| 3.86264582 | 5.18370649  | 7.02338498 |
| 8.88511017 | 5.17350109  | 6.97680219 |
| 3.20860546 | 2.72343804  | 6.92070072 |
| 8.19729183 | 2.72669661  | 6.92014429 |
| 0.64022501 | 8.43726961  | 6.99304682 |
| 5.73001200 | 8.31799439  | 6.96737645 |
| 4.99652855 | 10.91162182 | 6.89212825 |
| 7.55361333 | 10.19058688 | 7.06358745 |
| 1.38646238 | 5.89434176  | 6.75993050 |
| 6.40533297 | 5.91044030  | 6.79236295 |
| 0.68777239 | 3.26046191  | 6.73138786 |
| 5.68674638 | 3.27138886  | 6.74102177 |
| 0.00418013 | 0.85565532  | 6.70546730 |
| 4.98897720 | 0.85677965  | 6.71513288 |
| 3.24144559 | 11.75824377 | 5.17643186 |
| 8.21232888 | 11.77512622 | 5.15840546 |
| 8.87477817 | 9.19206336  | 4.95070962 |
| 3.87888683 | 9.20420862  | 5.11612894 |
| 7.50402828 | 4.23500084  | 5.03609245 |
| 2.51855076 | 4.22954433  | 5.03713084 |
| 8.19535867 | 6.74738592  | 4.93467376 |
| 3.20021914 | 6.76660781  | 4.92378434 |
| 5.65631690 | 12.42341085 | 4.89219048 |
| 2.50629835 | 0.06041699  | 7.01192092 |
| 3.23083066 | 1.47941532  | 4.83896225 |
| 8.20823092 | 1.48312639  | 4.84115907 |
| 1.40291699 | 9.86347748  | 4.76646957 |
| 6.38911890 | 9.89471400  | 4.78647015 |
| 5.01193575 | 4.86935406  | 4.76217678 |
| 0.02802293 | 4.84904503  | 4.71915038 |
| 0.72558581 | 7.29977801  | 4.73606077 |
| 5.73140829 | 7.31576070  | 4.70707103 |
| 5.74428624 | 2.19003323  | 4.51872451 |
| 0.75144570 | 2.18820396  | 4.51131125 |
| 8.92724419 | 3.16928101  | 3.13275409 |
| 3.93734455 | 3.16928101  | 3.13275409 |
| 9.65447807 | 0.51179242  | 2.92767382 |
| 4.66457796 | 0.51179242  | 2.92767382 |
| 8.19081593 | 10.75315189 | 2.92137337 |
| 3.20091629 | 10.75315189 | 2.92137337 |
| 7.52427816 | 8.16568470  | 2.89047265 |
| 2.53437829 | 8.16568470  | 2.89047265 |
| 6.46140337 | 3.88992119  | 2.81003308 |
| 1.47150326 | 3.88992119  | 2.81003308 |

|             |             |            |
|-------------|-------------|------------|
| 8.23615360  | 5.59719324  | 2.75910425 |
| 3.24625349  | 5.59719324  | 2.75910425 |
| 5.72548342  | 11.29866314 | 2.69921899 |
| 0.73558354  | 11.29866314 | 2.69921899 |
| 5.02271366  | 8.84247589  | 2.64073300 |
| 0.03281343  | 8.84247589  | 2.64073300 |
| 7.16234589  | 1.15467191  | 2.58495903 |
| 2.17244577  | 1.15467191  | 2.58495903 |
| 5.69094276  | 6.28061676  | 2.47308970 |
| 0.70104283  | 6.28061676  | 2.47308970 |
| 4.72644854  | 4.52631235  | 0.98044425 |
| -0.26345146 | 4.52631235  | 0.98044425 |
| 8.98416233  | 2.08401227  | 0.94984233 |
| 3.99426270  | 2.08401227  | 0.94984233 |
| 7.49692297  | 12.16127491 | 0.88189071 |
| 2.50702286  | 12.16127491 | 0.88189071 |
| 8.92881203  | 7.14167833  | 0.77916235 |
| 3.93891239  | 7.14167833  | 0.77916235 |
| 8.23179626  | 9.65808487  | 0.74752367 |
| 3.24189639  | 9.65808487  | 0.74752367 |
| 6.50168800  | 2.71004343  | 0.73384589 |
| 1.51178777  | 2.71004343  | 0.73384589 |
| 5.78449345  | 0.24636792  | 0.66762453 |
| 0.79459333  | 0.24636792  | 0.66762453 |
| 6.40908241  | 7.83185196  | 0.60482943 |
| 1.41918242  | 7.83185196  | 0.60482943 |
| 7.18588972  | 5.31081581  | 0.60368013 |
| 2.19598985  | 5.31081581  | 0.60368013 |
| 5.68450737  | 10.28863907 | 0.50651002 |
| 0.69460732  | 10.28863907 | 0.50651002 |

# CCH<sub>2</sub>cv + H

1.000000000000

|             |             |             |    |
|-------------|-------------|-------------|----|
| 9.97980000  | 0.00000000  | 0.00000000  |    |
| -0.76395804 | 12.66177393 | 0.00000000  |    |
| 0.00000004  | 0.00000004  | 19.64040000 |    |
| H           | C           | O           | Fe |
| 3           | 41          | 4           | 80 |

Cart

|            |             |            |
|------------|-------------|------------|
| 7.92737312 | 9.27181840  | 9.62209864 |
| 9.27817245 | 8.02838821  | 9.76388741 |
| 1.23323252 | 11.27483516 | 7.99321671 |
| 8.75782284 | 8.75521603  | 9.12749057 |

|             |             |            |
|-------------|-------------|------------|
| 4.59632870  | 2.57022878  | 8.21203130 |
| 9.58269773  | 2.56116565  | 8.22516976 |
| 4.18808681  | 9.28942448  | 7.40446973 |
| 6.87055634  | 7.08976080  | 8.38627984 |
| 1.76814202  | 7.62959792  | 8.41693363 |
| 9.37094187  | 9.26837303  | 7.97826436 |
| 2.19359510  | 4.22711537  | 7.20311687 |
| 7.17974925  | 4.24887673  | 7.18000019 |
| 3.45155341  | 11.93129074 | 7.18283175 |
| 8.40079765  | 11.84333821 | 7.18705681 |
| -0.32483301 | 6.79215674  | 6.33071329 |
| 4.67422961  | 6.72590612  | 6.30950761 |
| 1.73076628  | 1.56773542  | 6.17885810 |
| 6.72590799  | 1.60254933  | 6.16988183 |
| 2.18456318  | 8.27155298  | 5.57344029 |
| 7.21611635  | 8.34502640  | 5.71634529 |
| 9.19504917  | 3.12404105  | 5.30032930 |
| 4.20393247  | 3.13099347  | 5.29005221 |
| 4.67598564  | 10.79572133 | 4.26541675 |
| -0.30166175 | 10.79562264 | 4.26179310 |
| 6.73305364  | 5.71172413  | 4.02287386 |
| 1.73601034  | 5.68425112  | 4.01364130 |
| 7.18821747  | 12.34513080 | 3.64163964 |
| 2.19423621  | 12.34163181 | 3.64375871 |
| 9.23438167  | 7.21547854  | 3.37438644 |
| 4.24506325  | 7.19978836  | 3.34760747 |
| 5.47292232  | 2.23055553  | 2.34193015 |
| 0.48302215  | 2.23055553  | 2.34193015 |
| 6.73540354  | 9.72874641  | 2.00704742 |
| 1.74550355  | 9.72874641  | 2.00704742 |
| 7.98876715  | 3.77819967  | 1.47019899 |
| 2.99886727  | 3.77819967  | 1.47019899 |
| 9.21347809  | 11.29064846 | 1.28800344 |
| 4.22357798  | 11.29064846 | 1.28800344 |
| 5.52626467  | 6.13002825  | 0.45987183 |
| 0.53636485  | 6.13002825  | 0.45987183 |
| 7.45328903  | 1.12937152  | 0.40848067 |
| 2.46338916  | 1.12937152  | 0.40848067 |
| 4.75647831  | 8.73880577  | 0.18583304 |
| -0.23342146 | 8.73880577  | 0.18583304 |
| 1.64110215  | 7.39238974  | 9.58353960 |
| 4.72412454  | 2.39559698  | 9.38691239 |
| 9.69874779  | 2.38091655  | 9.40051707 |
| 6.44443841  | 6.95841591  | 9.49666366 |

|             |             |            |
|-------------|-------------|------------|
| 2.54088557  | 10.26855756 | 7.22708232 |
| -0.02560993 | 10.79969194 | 6.93894767 |
| 3.18397233  | 7.78050576  | 7.12326123 |
| 8.24269304  | 7.79211297  | 7.28078175 |
| 0.68738049  | 12.40522766 | 4.91149190 |
| 7.51874652  | 0.03705115  | 7.02289140 |
| 3.86530582  | 5.14710721  | 7.00309916 |
| 8.88233187  | 5.15080565  | 7.00869723 |
| 3.19861740  | 2.69078843  | 6.91008695 |
| 8.19271014  | 2.70727763  | 6.91588084 |
| 0.72194699  | 8.32001947  | 6.94367997 |
| 5.69092551  | 8.31259675  | 6.95985821 |
| 5.01545846  | 10.89516270 | 6.87244746 |
| 7.52140968  | 10.15941628 | 6.97792822 |
| 1.38349858  | 5.86768670  | 6.79829460 |
| 6.41909427  | 5.91273368  | 6.80808416 |
| 0.69333178  | 3.22844628  | 6.74802562 |
| 5.68121859  | 3.25890487  | 6.73164083 |
| -0.00147098 | 0.81355008  | 6.71710539 |
| 5.00674026  | 0.86792234  | 6.69955875 |
| 3.24728574  | 11.74489026 | 5.18604500 |
| 8.25162071  | 11.73895477 | 5.17556614 |
| 8.89933498  | 9.17679099  | 4.99423365 |
| 3.90694222  | 9.22339931  | 5.10837921 |
| 7.51011932  | 4.23202874  | 5.04285839 |
| 2.51456838  | 4.21850024  | 5.04441227 |
| 8.19315958  | 6.76799473  | 4.97722292 |
| 3.22113608  | 6.74513255  | 4.92116058 |
| 5.67546064  | 12.41450003 | 4.89201383 |
| 2.50692436  | 0.02531727  | 7.07344904 |
| 3.23133889  | 1.45203127  | 4.84019637 |
| 8.22162833  | 1.46287964  | 4.84018698 |
| 1.40523499  | 9.88952093  | 4.85222952 |
| 6.39802860  | 9.86681664  | 4.76344076 |
| 5.02152521  | 4.86130213  | 4.74446035 |
| 0.02603395  | 4.84050467  | 4.74677291 |
| 0.73107057  | 7.26075399  | 4.71411160 |
| 5.74157564  | 7.32301740  | 4.71748136 |
| 5.74790756  | 2.18329008  | 4.51379798 |
| 0.75853740  | 2.17611905  | 4.51838751 |
| 8.92724419  | 3.16928101  | 3.13275409 |
| 3.93734455  | 3.16928101  | 3.13275409 |
| 9.65447807  | 0.51179242  | 2.92767382 |
| 4.66457796  | 0.51179242  | 2.92767382 |

|             |             |            |
|-------------|-------------|------------|
| 8.19081593  | 10.75315189 | 2.92137337 |
| 3.20091629  | 10.75315189 | 2.92137337 |
| 7.52427816  | 8.16568470  | 2.89047265 |
| 2.53437829  | 8.16568470  | 2.89047265 |
| 6.46140337  | 3.88992119  | 2.81003308 |
| 1.47150326  | 3.88992119  | 2.81003308 |
| 8.23615360  | 5.59719324  | 2.75910425 |
| 3.24625349  | 5.59719324  | 2.75910425 |
| 5.72548342  | 11.29866314 | 2.69921899 |
| 0.73558354  | 11.29866314 | 2.69921899 |
| 5.02271366  | 8.84247589  | 2.64073300 |
| 0.03281343  | 8.84247589  | 2.64073300 |
| 7.16234589  | 1.15467191  | 2.58495903 |
| 2.17244577  | 1.15467191  | 2.58495903 |
| 5.69094276  | 6.28061676  | 2.47308970 |
| 0.70104283  | 6.28061676  | 2.47308970 |
| 4.72644854  | 4.52631235  | 0.98044425 |
| -0.26345146 | 4.52631235  | 0.98044425 |
| 8.98416233  | 2.08401227  | 0.94984233 |
| 3.99426270  | 2.08401227  | 0.94984233 |
| 7.49692297  | 12.16127491 | 0.88189071 |
| 2.50702286  | 12.16127491 | 0.88189071 |
| 8.92881203  | 7.14167833  | 0.77916235 |
| 3.93891239  | 7.14167833  | 0.77916235 |
| 8.23179626  | 9.65808487  | 0.74752367 |
| 3.24189639  | 9.65808487  | 0.74752367 |
| 6.50168800  | 2.71004343  | 0.73384589 |
| 1.51178777  | 2.71004343  | 0.73384589 |
| 5.78449345  | 0.24636792  | 0.66762453 |
| 0.79459333  | 0.24636792  | 0.66762453 |
| 6.40908241  | 7.83185196  | 0.60482943 |
| 1.41918242  | 7.83185196  | 0.60482943 |
| 7.18588972  | 5.31081581  | 0.60368013 |
| 2.19598985  | 5.31081581  | 0.60368013 |
| 5.68450737  | 10.28863907 | 0.50651002 |
| 0.69460732  | 10.28863907 | 0.50651002 |

# TS for CCH<sub>2</sub> cv+H->CCH<sub>3</sub> cv

1.000000000000

|             |             |             |
|-------------|-------------|-------------|
| 9.97980000  | 0.00000000  | 0.00000000  |
| -0.76395804 | 12.66177393 | 0.00000000  |
| 0.00000004  | 0.00000004  | 19.64040000 |
| H           | C           | O Fe        |

|      | 3           | 41 | 4           | 80         |
|------|-------------|----|-------------|------------|
| Cart |             |    |             |            |
|      | 0.55847223  |    | 9.75268774  | 9.63910384 |
|      | 8.99194841  |    | 10.72661140 | 9.58113237 |
|      | 0.70818303  |    | 11.18091583 | 8.38070695 |
|      | -0.26724249 |    | 10.12018310 | 9.01899668 |
|      | 4.61018866  |    | 2.61448432  | 8.22424729 |
|      | 9.59298981  |    | 2.57132085  | 8.22263103 |
|      | 4.19252230  |    | 9.28139598  | 7.41173745 |
|      | 6.85073683  |    | 7.47751247  | 8.44643750 |
|      | 1.74851890  |    | 7.60469226  | 8.41965297 |
|      | 9.26958925  |    | 9.24585921  | 7.96481088 |
|      | 2.18840913  |    | 4.24097811  | 7.20188327 |
|      | 7.18229510  |    | 4.25751740  | 7.19757684 |
|      | 3.41578017  |    | 11.91994396 | 7.18644307 |
|      | 8.38778833  |    | 11.86063911 | 7.16663489 |
|      | -0.34483184 |    | 6.79977998  | 6.31377210 |
|      | 4.66318894  |    | 6.75488914  | 6.31798995 |
|      | 1.73086619  |    | 1.59498846  | 6.17764109 |
|      | 6.71982186  |    | 1.61651350  | 6.17613725 |
|      | 2.16677207  |    | 8.28561636  | 5.60289239 |
|      | 7.19262271  |    | 8.34153806  | 5.67976509 |
|      | 9.19132886  |    | 3.13380439  | 5.30120604 |
|      | 4.20409257  |    | 3.13642150  | 5.29962540 |
|      | 4.66967358  |    | 10.81078637 | 4.26926282 |
|      | -0.30399280 |    | 10.80593671 | 4.25587933 |
|      | 6.72563530  |    | 5.70961458  | 4.01853993 |
|      | 1.73388951  |    | 5.69265245  | 4.01504826 |
|      | 7.18620461  |    | 12.34688386 | 3.64524313 |
|      | 2.18910410  |    | 12.34825559 | 3.64558818 |
|      | 9.22896904  |    | 7.21089592  | 3.35799601 |
|      | 4.24222848  |    | 7.20076553  | 3.34925223 |
|      | 5.47292232  |    | 2.23055553  | 2.34193015 |
|      | 0.48302215  |    | 2.23055553  | 2.34193015 |
|      | 6.73540354  |    | 9.72874641  | 2.00704742 |
|      | 1.74550355  |    | 9.72874641  | 2.00704742 |
|      | 7.98876715  |    | 3.77819967  | 1.47019899 |
|      | 2.99886727  |    | 3.77819967  | 1.47019899 |
|      | 9.21347809  |    | 11.29064846 | 1.28800344 |
|      | 4.22357798  |    | 11.29064846 | 1.28800344 |
|      | 5.52626467  |    | 6.13002825  | 0.45987183 |
|      | 0.53636485  |    | 6.13002825  | 0.45987183 |
|      | 7.45328903  |    | 1.12937152  | 0.40848067 |
|      | 2.46338916  |    | 1.12937152  | 0.40848067 |

|             |             |            |
|-------------|-------------|------------|
| 4.75647831  | 8.73880577  | 0.18583304 |
| -0.23342146 | 8.73880577  | 0.18583304 |
| 1.62575020  | 7.37738605  | 9.58649209 |
| 4.73588638  | 2.45047090  | 9.40130703 |
| 9.73460450  | 2.38281854  | 9.39503443 |
| 6.58903981  | 7.23100331  | 9.58269572 |
| 2.53999336  | 10.23317953 | 7.13360163 |
| -0.02422852 | 10.84211550 | 7.01013560 |
| 3.16965319  | 7.77619966  | 7.13629068 |
| 8.21949780  | 7.83040618  | 7.20006049 |
| 0.68341469  | 12.40616008 | 4.92019945 |
| 7.50547603  | 0.05390835  | 7.02276658 |
| 3.86000917  | 5.15863446  | 6.99424829 |
| 8.86663889  | 5.16520698  | 6.98511660 |
| 3.20195574  | 2.70860232  | 6.91950584 |
| 8.19514989  | 2.71997983  | 6.92211007 |
| 0.68375549  | 8.30631385  | 6.95191297 |
| 5.69933514  | 8.31047991  | 6.97992169 |
| 4.99812454  | 10.90131078 | 6.87347493 |
| 7.48388427  | 10.17125416 | 6.97384632 |
| 1.36756247  | 5.87339812  | 6.78819039 |
| 6.39040523  | 5.90918224  | 6.80143505 |
| 0.68965537  | 3.24559528  | 6.74027430 |
| 5.68399405  | 3.26614494  | 6.73759043 |
| -0.00230731 | 0.83416664  | 6.71251061 |
| 4.99376711  | 0.86227001  | 6.71082873 |
| 3.24234526  | 11.76241431 | 5.18319048 |
| 8.25783946  | 11.74199150 | 5.18162376 |
| 8.89093531  | 9.19904975  | 4.98737347 |
| 3.88787457  | 9.22288413  | 5.08099462 |
| 7.50178982  | 4.23139914  | 5.03952879 |
| 2.51242340  | 4.22109814  | 5.04138356 |
| 8.18268385  | 6.76770842  | 4.94658084 |
| 3.20876426  | 6.75298583  | 4.92461545 |
| 5.67367627  | 12.42112591 | 4.89397580 |
| 2.48214120  | 0.03379088  | 7.06108968 |
| 3.22479087  | 1.46819849  | 4.84132510 |
| 8.21903379  | 1.46821376  | 4.84382336 |
| 1.38924637  | 9.89728850  | 4.86057659 |
| 6.38227093  | 9.87044357  | 4.75834225 |
| 5.01764681  | 4.86029986  | 4.74558884 |
| 0.02220798  | 4.84657450  | 4.73500390 |
| 0.72635233  | 7.27577932  | 4.70625566 |
| 5.72454330  | 7.31642347  | 4.71806191 |

|             |             |            |
|-------------|-------------|------------|
| 5.74332075  | 2.18393550  | 4.51868364 |
| 0.75463230  | 2.17795906  | 4.51752665 |
| 8.92724419  | 3.16928101  | 3.13275409 |
| 3.93734455  | 3.16928101  | 3.13275409 |
| 9.65447807  | 0.51179242  | 2.92767382 |
| 4.66457796  | 0.51179242  | 2.92767382 |
| 8.19081593  | 10.75315189 | 2.92137337 |
| 3.20091629  | 10.75315189 | 2.92137337 |
| 7.52427816  | 8.16568470  | 2.89047265 |
| 2.53437829  | 8.16568470  | 2.89047265 |
| 6.46140337  | 3.88992119  | 2.81003308 |
| 1.47150326  | 3.88992119  | 2.81003308 |
| 8.23615360  | 5.59719324  | 2.75910425 |
| 3.24625349  | 5.59719324  | 2.75910425 |
| 5.72548342  | 11.29866314 | 2.69921899 |
| 0.73558354  | 11.29866314 | 2.69921899 |
| 5.02271366  | 8.84247589  | 2.64073300 |
| 0.03281343  | 8.84247589  | 2.64073300 |
| 7.16234589  | 1.15467191  | 2.58495903 |
| 2.17244577  | 1.15467191  | 2.58495903 |
| 5.69094276  | 6.28061676  | 2.47308970 |
| 0.70104283  | 6.28061676  | 2.47308970 |
| 4.72644854  | 4.52631235  | 0.98044425 |
| -0.26345146 | 4.52631235  | 0.98044425 |
| 8.98416233  | 2.08401227  | 0.94984233 |
| 3.99426270  | 2.08401227  | 0.94984233 |
| 7.49692297  | 12.16127491 | 0.88189071 |
| 2.50702286  | 12.16127491 | 0.88189071 |
| 8.92881203  | 7.14167833  | 0.77916235 |
| 3.93891239  | 7.14167833  | 0.77916235 |
| 8.23179626  | 9.65808487  | 0.74752367 |
| 3.24189639  | 9.65808487  | 0.74752367 |
| 6.50168800  | 2.71004343  | 0.73384589 |
| 1.51178777  | 2.71004343  | 0.73384589 |
| 5.78449345  | 0.24636792  | 0.66762453 |
| 0.79459333  | 0.24636792  | 0.66762453 |
| 6.40908241  | 7.83185196  | 0.60482943 |
| 1.41918242  | 7.83185196  | 0.60482943 |
| 7.18588972  | 5.31081581  | 0.60368013 |
| 2.19598985  | 5.31081581  | 0.60368013 |
| 5.68450737  | 10.28863907 | 0.50651002 |
| 0.69460732  | 10.28863907 | 0.50651002 |



# CCH<sub>3</sub> cv

1.000000000000

|             |             |             |    |
|-------------|-------------|-------------|----|
| 9.97980000  | 0.00000000  | 0.00000000  |    |
| -0.76395804 | 12.66177393 | 0.00000000  |    |
| 0.00000004  | 0.00000004  | 19.64040000 |    |
| H           | C           | O           | Fe |
| 3           | 41          | 4           | 80 |

Cart

|             |             |             |
|-------------|-------------|-------------|
| 8.42274224  | 9.07038248  | 10.02188211 |
| -0.62971249 | 10.57639402 | 9.77812267  |
| 0.20712375  | 9.01558303  | 9.95517601  |
| 9.30201910  | 9.50703498  | 9.52328331  |
| 4.62541951  | 2.62707453  | 8.22793472  |
| 9.60912478  | 2.59065188  | 8.22859402  |
| 4.20866260  | 9.28472036  | 7.40130722  |
| 6.81947419  | 7.56329713  | 8.43320321  |
| 1.77005752  | 7.56218450  | 8.42142934  |
| 9.26126183  | 9.24642856  | 8.03961155  |
| 2.19938915  | 4.25037775  | 7.19340481  |
| 7.19717893  | 4.25948713  | 7.19118635  |
| 3.40997724  | 11.90617190 | 7.19089213  |
| 8.41390689  | 11.85999740 | 7.16821881  |
| -0.33674510 | 6.82000876  | 6.32545554  |
| 4.67233017  | 6.76366879  | 6.31968985  |
| 1.73762477  | 1.60978738  | 6.16928493  |
| 6.73032918  | 1.61078295  | 6.17844625  |
| 2.17497304  | 8.29558395  | 5.62499722  |
| 7.20054268  | 8.34408054  | 5.67032723  |
| 9.19694457  | 3.13493904  | 5.30299551  |
| 4.20872846  | 3.13663846  | 5.30259995  |
| 4.67336450  | 10.81491049 | 4.26719163  |
| -0.31014002 | 10.81664075 | 4.27003825  |
| 6.72472750  | 5.70591945  | 4.01700700  |
| 1.73527969  | 5.69765357  | 4.01764723  |
| 7.18064497  | 12.34839439 | 3.64087475  |
| 2.18973044  | 12.34823248 | 3.64090849  |
| 9.23180121  | 7.21211890  | 3.36327960  |
| 4.24340100  | 7.20128951  | 3.35265236  |
| 5.47292232  | 2.23055553  | 2.34193015  |
| 0.48302215  | 2.23055553  | 2.34193015  |
| 6.73540354  | 9.72874641  | 2.00704742  |
| 1.74550355  | 9.72874641  | 2.00704742  |
| 7.98876715  | 3.77819967  | 1.47019899  |
| 2.99886727  | 3.77819967  | 1.47019899  |

|             |             |            |
|-------------|-------------|------------|
| 9.21347809  | 11.29064846 | 1.28800344 |
| 4.22357798  | 11.29064846 | 1.28800344 |
| 5.52626467  | 6.13002825  | 0.45987183 |
| 0.53636485  | 6.13002825  | 0.45987183 |
| 7.45328903  | 1.12937152  | 0.40848067 |
| 2.46338916  | 1.12937152  | 0.40848067 |
| 4.75647831  | 8.73880577  | 0.18583304 |
| -0.23342146 | 8.73880577  | 0.18583304 |
| 1.68946387  | 7.25386487  | 9.57393239 |
| 4.75617490  | 2.47158924  | 9.40529898 |
| 9.75132998  | 2.42404823  | 9.40211840 |
| 6.62355681  | 7.31403382  | 9.58505889 |
| 2.54149671  | 10.21221871 | 7.09644885 |
| -0.00978567 | 10.79191373 | 6.87547016 |
| 3.18842578  | 7.77561382  | 7.13784483 |
| 8.22503293  | 7.83124132  | 7.17382915 |
| 0.67942697  | 12.41543256 | 4.90244370 |
| 7.52355258  | 0.05284103  | 7.02095986 |
| 3.87456050  | 5.15763394  | 6.98132384 |
| 8.87909248  | 5.16634597  | 6.97145708 |
| 3.21401436  | 2.71553850  | 6.92250958 |
| 8.20799303  | 2.72043768  | 6.92399677 |
| 0.68399246  | 8.34052833  | 6.99500253 |
| 5.71742871  | 8.32274174  | 6.97163277 |
| 5.00906561  | 10.91177725 | 6.87623514 |
| 7.54885980  | 10.16940233 | 7.04257859 |
| 1.37484579  | 5.88406337  | 6.77962931 |
| 6.39356227  | 5.90537748  | 6.78522745 |
| 0.70054458  | 3.25041156  | 6.73846102 |
| 5.69585638  | 3.26652636  | 6.73682693 |
| 0.01555844  | 0.82761173  | 6.71879592 |
| 5.00122292  | 0.85806157  | 6.71675034 |
| 3.24219383  | 11.76143155 | 5.17772269 |
| 8.23565195  | 11.75386099 | 5.17264282 |
| 8.87931140  | 9.19019805  | 4.96101628 |
| 3.89512633  | 9.22197426  | 5.06475463 |
| 7.50693808  | 4.22664498  | 5.03371376 |
| 2.51759960  | 4.22334776  | 5.03660068 |
| 8.18811972  | 6.75113374  | 4.94078532 |
| 3.20800346  | 6.75528231  | 4.92824009 |
| 5.67258497  | 12.42352515 | 4.89663438 |
| 2.50736549  | 0.05332170  | 7.02452661 |
| 3.23041724  | 1.47211179  | 4.84190446 |
| 8.22158093  | 1.47365543  | 4.84286405 |

|             |             |            |
|-------------|-------------|------------|
| 1.40000927  | 9.87373810  | 4.80691783 |
| 6.39104137  | 9.88419718  | 4.77866069 |
| 5.02024269  | 4.85646636  | 4.73941530 |
| 0.02863900  | 4.84542718  | 4.73022158 |
| 0.72741152  | 7.28922268  | 4.71974111 |
| 5.72701678  | 7.31693346  | 4.71443410 |
| 5.74788643  | 2.18373937  | 4.51922097 |
| 0.75744530  | 2.18208457  | 4.51529206 |
| 8.92724419  | 3.16928101  | 3.13275409 |
| 3.93734455  | 3.16928101  | 3.13275409 |
| 9.65447807  | 0.51179242  | 2.92767382 |
| 4.66457796  | 0.51179242  | 2.92767382 |
| 8.19081593  | 10.75315189 | 2.92137337 |
| 3.20091629  | 10.75315189 | 2.92137337 |
| 7.52427816  | 8.16568470  | 2.89047265 |
| 2.53437829  | 8.16568470  | 2.89047265 |
| 6.46140337  | 3.88992119  | 2.81003308 |
| 1.47150326  | 3.88992119  | 2.81003308 |
| 8.23615360  | 5.59719324  | 2.75910425 |
| 3.24625349  | 5.59719324  | 2.75910425 |
| 5.72548342  | 11.29866314 | 2.69921899 |
| 0.73558354  | 11.29866314 | 2.69921899 |
| 5.02271366  | 8.84247589  | 2.64073300 |
| 0.03281343  | 8.84247589  | 2.64073300 |
| 7.16234589  | 1.15467191  | 2.58495903 |
| 2.17244577  | 1.15467191  | 2.58495903 |
| 5.69094276  | 6.28061676  | 2.47308970 |
| 0.70104283  | 6.28061676  | 2.47308970 |
| 4.72644854  | 4.52631235  | 0.98044425 |
| -0.26345146 | 4.52631235  | 0.98044425 |
| 8.98416233  | 2.08401227  | 0.94984233 |
| 3.99426270  | 2.08401227  | 0.94984233 |
| 7.49692297  | 12.16127491 | 0.88189071 |
| 2.50702286  | 12.16127491 | 0.88189071 |
| 8.92881203  | 7.14167833  | 0.77916235 |
| 3.93891239  | 7.14167833  | 0.77916235 |
| 8.23179626  | 9.65808487  | 0.74752367 |
| 3.24189639  | 9.65808487  | 0.74752367 |
| 6.50168800  | 2.71004343  | 0.73384589 |
| 1.51178777  | 2.71004343  | 0.73384589 |
| 5.78449345  | 0.24636792  | 0.66762453 |
| 0.79459333  | 0.24636792  | 0.66762453 |
| 6.40908241  | 7.83185196  | 0.60482943 |
| 1.41918242  | 7.83185196  | 0.60482943 |

|            |             |            |
|------------|-------------|------------|
| 7.18588972 | 5.31081581  | 0.60368013 |
| 2.19598985 | 5.31081581  | 0.60368013 |
| 5.68450737 | 10.28863907 | 0.50651002 |
| 0.69460732 | 10.28863907 | 0.50651002 |

# TS for CCH<sub>3</sub><sub>CV</sub>->CCH<sub>3</sub>+Cv

1.000000000000

|             |             |             |    |
|-------------|-------------|-------------|----|
| 9.97980000  | 0.00000000  | 0.00000000  |    |
| -0.76395804 | 12.66177393 | 0.00000000  |    |
| 0.00000004  | 0.00000004  | 19.64040000 |    |
| H           | C           | O           | Fe |
| 3           | 41          | 4           | 80 |

Cart

|             |             |             |
|-------------|-------------|-------------|
| 9.00069530  | 9.33992377  | 10.00419744 |
| -0.08215179 | 10.87579745 | 9.88650296  |
| 0.77525324  | 9.33192934  | 10.21046718 |
| -0.04515584 | 9.80355772  | 9.64569162  |
| 4.60995313  | 2.58891129  | 8.22211679  |
| 9.58881737  | 2.55226980  | 8.22510119  |
| 4.19121608  | 9.28199670  | 7.40171620  |
| 6.76155285  | 7.98471394  | 8.49799209  |
| 1.80257282  | 7.40209812  | 8.41084217  |
| 0.12854057  | 9.56990861  | 8.18883832  |
| 2.19696458  | 4.24074241  | 7.18559930  |
| 7.20080635  | 4.25709325  | 7.20956870  |
| 3.37187158  | 11.90355555 | 7.20190702  |
| 8.43082733  | 11.80945135 | 7.17230904  |
| -0.31249463 | 6.87673344  | 6.38233845  |
| 4.68787515  | 6.75170456  | 6.32768807  |
| 1.72841847  | 1.59775023  | 6.16136576  |
| 6.72061655  | 1.60948743  | 6.18176550  |
| 2.19636644  | 8.28460325  | 5.62884577  |
| 7.16866467  | 8.35060338  | 5.64843543  |
| 9.19429421  | 3.13776265  | 5.30305281  |
| 4.20954041  | 3.13854689  | 5.30268093  |
| 4.66757228  | 10.81808372 | 4.27709059  |
| -0.30715734 | 10.82813260 | 4.29684622  |
| 6.72699247  | 5.71041379  | 4.02093370  |
| 1.73747117  | 5.69821158  | 4.02256001  |
| 7.17352668  | 12.35101335 | 3.63238117  |
| 2.19468958  | 12.34738725 | 3.63793135  |
| 9.23464763  | 7.21044406  | 3.38002290  |
| 4.24241761  | 7.20291065  | 3.35114300  |

|             |             |            |
|-------------|-------------|------------|
| 5.47292232  | 2.23055553  | 2.34193015 |
| 0.48302215  | 2.23055553  | 2.34193015 |
| 6.73540354  | 9.72874641  | 2.00704742 |
| 1.74550355  | 9.72874641  | 2.00704742 |
| 7.98876715  | 3.77819967  | 1.47019899 |
| 2.99886727  | 3.77819967  | 1.47019899 |
| 9.21347809  | 11.29064846 | 1.28800344 |
| 4.22357798  | 11.29064846 | 1.28800344 |
| 5.52626467  | 6.13002825  | 0.45987183 |
| 0.53636485  | 6.13002825  | 0.45987183 |
| 7.45328903  | 1.12937152  | 0.40848067 |
| 2.46338916  | 1.12937152  | 0.40848067 |
| 4.75647831  | 8.73880577  | 0.18583304 |
| -0.23342146 | 8.73880577  | 0.18583304 |
| 1.73466447  | 7.07082307  | 9.55808663 |
| 4.73196970  | 2.42096663  | 9.39991085 |
| 9.74134566  | 2.37444592  | 9.39749160 |
| 6.84054315  | 7.87386112  | 9.68378648 |
| 2.50490542  | 10.19972948 | 7.15005035 |
| -0.03630396 | 10.75615687 | 6.77733039 |
| 3.22938230  | 7.74485320  | 7.14662429 |
| 8.24132588  | 7.92200964  | 7.17701976 |
| 0.68215648  | 12.44102662 | 4.88000957 |
| 7.53109429  | 0.05435277  | 7.02859397 |
| 3.88344948  | 5.13886329  | 6.97952963 |
| 8.87544316  | 5.19823537  | 6.95595044 |
| 3.20386446  | 2.69977634  | 6.91857765 |
| 8.20179991  | 2.72201078  | 6.92542594 |
| 0.79612660  | 8.30892147  | 7.03163142 |
| 5.71929034  | 8.34382709  | 6.98367112 |
| 4.95946548  | 10.91019537 | 6.87073674 |
| 7.40075869  | 10.22779586 | 6.94843634 |
| 1.37330701  | 5.87249093  | 6.76900729 |
| 6.40784867  | 5.88773059  | 6.74801391 |
| 0.69349429  | 3.23697357  | 6.73840096 |
| 5.69559707  | 3.25833894  | 6.74558289 |
| 0.00390796  | 0.80716474  | 6.71991858 |
| 4.99472166  | 0.84203187  | 6.73402516 |
| 3.22983075  | 11.75323913 | 5.18626487 |
| 8.22911697  | 11.77279670 | 5.15513485 |
| 8.88808022  | 9.18729858  | 4.97403363 |
| 3.89655736  | 9.21453422  | 5.07262596 |
| 7.50950306  | 4.22946947  | 5.03304223 |
| 2.51608898  | 4.21622937  | 5.03889377 |

|             |             |            |
|-------------|-------------|------------|
| 8.18641618  | 6.76226146  | 4.97544215 |
| 3.21241234  | 6.75020167  | 4.92494095 |
| 5.66757365  | 12.42284125 | 4.90158183 |
| 2.45707867  | 0.01634020  | 7.01833261 |
| 3.23630203  | 1.46902452  | 4.84158381 |
| 8.21132463  | 1.48126808  | 4.84271466 |
| 1.40423406  | 9.85956972  | 4.78623923 |
| 6.38457603  | 9.87574986  | 4.72247515 |
| 5.02288720  | 4.85207357  | 4.73713969 |
| 0.02715882  | 4.84421880  | 4.72289962 |
| 0.72929568  | 7.28254834  | 4.72723258 |
| 5.72507717  | 7.30792426  | 4.71702943 |
| 5.74397303  | 2.18292131  | 4.52412151 |
| 0.75251348  | 2.18677650  | 4.51139459 |
| 8.92724419  | 3.16928101  | 3.13275409 |
| 3.93734455  | 3.16928101  | 3.13275409 |
| 9.65447807  | 0.51179242  | 2.92767382 |
| 4.66457796  | 0.51179242  | 2.92767382 |
| 8.19081593  | 10.75315189 | 2.92137337 |
| 3.20091629  | 10.75315189 | 2.92137337 |
| 7.52427816  | 8.16568470  | 2.89047265 |
| 2.53437829  | 8.16568470  | 2.89047265 |
| 6.46140337  | 3.88992119  | 2.81003308 |
| 1.47150326  | 3.88992119  | 2.81003308 |
| 8.23615360  | 5.59719324  | 2.75910425 |
| 3.24625349  | 5.59719324  | 2.75910425 |
| 5.72548342  | 11.29866314 | 2.69921899 |
| 0.73558354  | 11.29866314 | 2.69921899 |
| 5.02271366  | 8.84247589  | 2.64073300 |
| 0.03281343  | 8.84247589  | 2.64073300 |
| 7.16234589  | 1.15467191  | 2.58495903 |
| 2.17244577  | 1.15467191  | 2.58495903 |
| 5.69094276  | 6.28061676  | 2.47308970 |
| 0.70104283  | 6.28061676  | 2.47308970 |
| 4.72644854  | 4.52631235  | 0.98044425 |
| -0.26345146 | 4.52631235  | 0.98044425 |
| 8.98416233  | 2.08401227  | 0.94984233 |
| 3.99426270  | 2.08401227  | 0.94984233 |
| 7.49692297  | 12.16127491 | 0.88189071 |
| 2.50702286  | 12.16127491 | 0.88189071 |
| 8.92881203  | 7.14167833  | 0.77916235 |
| 3.93891239  | 7.14167833  | 0.77916235 |
| 8.23179626  | 9.65808487  | 0.74752367 |
| 3.24189639  | 9.65808487  | 0.74752367 |

|            |             |            |
|------------|-------------|------------|
| 6.50168800 | 2.71004343  | 0.73384589 |
| 1.51178777 | 2.71004343  | 0.73384589 |
| 5.78449345 | 0.24636792  | 0.66762453 |
| 0.79459333 | 0.24636792  | 0.66762453 |
| 6.40908241 | 7.83185196  | 0.60482943 |
| 1.41918242 | 7.83185196  | 0.60482943 |
| 7.18588972 | 5.31081581  | 0.60368013 |
| 2.19598985 | 5.31081581  | 0.60368013 |
| 5.68450737 | 10.28863907 | 0.50651002 |
| 0.69460732 | 10.28863907 | 0.50651002 |

# CCH<sub>3</sub>+Cv

1.000000000000

|             |             |             |    |
|-------------|-------------|-------------|----|
| 9.97980000  | 0.00000000  | 0.00000000  |    |
| -0.76395804 | 12.66177393 | 0.00000000  |    |
| 0.00000004  | 0.00000004  | 19.64040000 |    |
| H           | C           | O           | Fe |
| 3           | 41          | 4           | 80 |

Cart

|             |             |             |
|-------------|-------------|-------------|
| -0.49647790 | 9.64502977  | 9.77463151  |
| 0.44011636  | 11.14233773 | 9.90163080  |
| 1.22785675  | 9.56272545  | 10.21064360 |
| 0.49379367  | 10.08906339 | 9.58248600  |
| 4.59750056  | 2.60289770  | 8.22359177  |
| 9.57774086  | 2.55977822  | 8.22697789  |
| 4.15651011  | 9.29384328  | 7.38631930  |
| 6.74767428  | 8.14352848  | 8.50740645  |
| 2.07049614  | 7.01901693  | 8.42596740  |
| 0.81787055  | 10.02244036 | 8.12915174  |
| 2.15871677  | 4.25723040  | 7.16453466  |
| 7.20136644  | 4.25676738  | 7.21133666  |
| 3.38578843  | 11.91284786 | 7.19911951  |
| 8.44105152  | 11.77157052 | 7.18086040  |
| -0.31557742 | 6.88600766  | 6.43099581  |
| 4.68255793  | 6.74614094  | 6.31448340  |
| 1.71943075  | 1.60263224  | 6.16104748  |
| 6.72103236  | 1.60323727  | 6.18684623  |
| 2.16748780  | 8.27930191  | 5.62634435  |
| 7.16348415  | 8.34290383  | 5.63169805  |
| 9.18843290  | 3.13186269  | 5.30657120  |
| 4.20133014  | 3.14205811  | 5.30619966  |
| 4.66347899  | 10.81400978 | 4.28149656  |
| -0.30848016 | 10.82566245 | 4.29849567  |

|             |             |            |
|-------------|-------------|------------|
| 6.71965055  | 5.70180748  | 4.02099079 |
| 1.73081191  | 5.69519617  | 4.01912488 |
| 7.16855284  | 12.35240921 | 3.62513919 |
| 2.19384596  | 12.34925796 | 3.63090528 |
| 9.23126166  | 7.20937626  | 3.37421079 |
| 4.24035915  | 7.20490165  | 3.34949157 |
| 5.47292232  | 2.23055553  | 2.34193015 |
| 0.48302215  | 2.23055553  | 2.34193015 |
| 6.73540354  | 9.72874641  | 2.00704742 |
| 1.74550355  | 9.72874641  | 2.00704742 |
| 7.98876715  | 3.77819967  | 1.47019899 |
| 2.99886727  | 3.77819967  | 1.47019899 |
| 9.21347809  | 11.29064846 | 1.28800344 |
| 4.22357798  | 11.29064846 | 1.28800344 |
| 5.52626467  | 6.13002825  | 0.45987183 |
| 0.53636485  | 6.13002825  | 0.45987183 |
| 7.45328903  | 1.12937152  | 0.40848067 |
| 2.46338916  | 1.12937152  | 0.40848067 |
| 4.75647831  | 8.73880577  | 0.18583304 |
| -0.23342146 | 8.73880577  | 0.18583304 |
| 1.74242768  | 6.95729319  | 9.56950055 |
| 4.71102293  | 2.45516891  | 9.40570311 |
| 9.73497283  | 2.38558688  | 9.39965461 |
| 6.83307864  | 8.16378167  | 9.69754603 |
| 2.49410221  | 10.23234236 | 7.18205336 |
| 0.00296452  | 10.85231515 | 6.70691149 |
| 3.22080090  | 7.73889163  | 7.15024911 |
| 8.12237409  | 7.77932296  | 7.16196405 |
| 0.69122165  | 12.43826007 | 4.86919238 |
| 7.54316718  | 0.03502384  | 7.02247044 |
| 3.85503034  | 5.16657250  | 7.01709179 |
| 8.86698381  | 5.20696961  | 6.96597482 |
| 3.18762732  | 2.71317980  | 6.92160688 |
| 8.19208014  | 2.71631975  | 6.92641773 |
| 0.71181258  | 8.45767020  | 6.92744791 |
| 5.68937085  | 8.36964904  | 6.95926328 |
| 4.95777463  | 10.91340382 | 6.84592273 |
| 7.43059758  | 10.17435748 | 6.92871109 |
| 1.39948858  | 5.94514229  | 6.83250639 |
| 6.39625329  | 5.87116222  | 6.73388874 |
| 0.67803196  | 3.23651940  | 6.73571337 |
| 5.68482757  | 3.26654013  | 6.75058602 |
| -0.00175913 | 0.80221470  | 6.71301751 |
| 4.99863619  | 0.85485677  | 6.73970250 |



|             |             |            |
|-------------|-------------|------------|
| 3.21934625  | 11.75238392 | 5.18287769 |
| 8.21618268  | 11.76964932 | 5.14895999 |
| 8.90636168  | 9.18560462  | 5.02608648 |
| 3.88293696  | 9.21364096  | 5.07921211 |
| 7.50808101  | 4.22498019  | 5.02995126 |
| 2.50817588  | 4.22972242  | 5.04946250 |
| 8.17972022  | 6.75052699  | 4.95400144 |
| 3.20876389  | 6.75235774  | 4.92455128 |
| 5.66568987  | 12.42340659 | 4.90027251 |
| 2.47737596  | 0.04502299  | 7.01683039 |
| 3.23510590  | 1.48032136  | 4.84101577 |
| 8.20891833  | 1.47931346  | 4.84281210 |
| 1.42189409  | 9.86569064  | 4.74700972 |
| 6.38157200  | 9.87828362  | 4.71326581 |
| 5.00871584  | 4.85557363  | 4.74402087 |
| 0.01835903  | 4.84179245  | 4.71844821 |
| 0.72102061  | 7.26859200  | 4.73200360 |
| 5.72319841  | 7.30894229  | 4.71044461 |
| 5.74266099  | 2.18506488  | 4.52995342 |
| 0.75067929  | 2.18576506  | 4.50937811 |
| 8.92724419  | 3.16928101  | 3.13275409 |
| 3.93734455  | 3.16928101  | 3.13275409 |
| 9.65447807  | 0.51179242  | 2.92767382 |
| 4.66457796  | 0.51179242  | 2.92767382 |
| 8.19081593  | 10.75315189 | 2.92137337 |
| 3.20091629  | 10.75315189 | 2.92137337 |
| 7.52427816  | 8.16568470  | 2.89047265 |
| 2.53437829  | 8.16568470  | 2.89047265 |
| 6.46140337  | 3.88992119  | 2.81003308 |
| 1.47150326  | 3.88992119  | 2.81003308 |
| 8.23615360  | 5.59719324  | 2.75910425 |
| 3.24625349  | 5.59719324  | 2.75910425 |
| 5.72548342  | 11.29866314 | 2.69921899 |
| 0.73558354  | 11.29866314 | 2.69921899 |
| 5.02271366  | 8.84247589  | 2.64073300 |
| 0.03281343  | 8.84247589  | 2.64073300 |
| 7.16234589  | 1.15467191  | 2.58495903 |
| 2.17244577  | 1.15467191  | 2.58495903 |
| 5.69094276  | 6.28061676  | 2.47308970 |
| 0.70104283  | 6.28061676  | 2.47308970 |
| 4.72644854  | 4.52631235  | 0.98044425 |
| -0.26345146 | 4.52631235  | 0.98044425 |
| 8.98416233  | 2.08401227  | 0.94984233 |
| 3.99426270  | 2.08401227  | 0.94984233 |

|            |             |            |
|------------|-------------|------------|
| 7.49692297 | 12.16127491 | 0.88189071 |
| 2.50702286 | 12.16127491 | 0.88189071 |
| 8.92881203 | 7.14167833  | 0.77916235 |
| 3.93891239 | 7.14167833  | 0.77916235 |
| 8.23179626 | 9.65808487  | 0.74752367 |
| 3.24189639 | 9.65808487  | 0.74752367 |
| 6.50168800 | 2.71004343  | 0.73384589 |
| 1.51178777 | 2.71004343  | 0.73384589 |
| 5.78449345 | 0.24636792  | 0.66762453 |
| 0.79459333 | 0.24636792  | 0.66762453 |
| 6.40908241 | 7.83185196  | 0.60482943 |
| 1.41918242 | 7.83185196  | 0.60482943 |
| 7.18588972 | 5.31081581  | 0.60368013 |
| 2.19598985 | 5.31081581  | 0.60368013 |
| 5.68450737 | 10.28863907 | 0.50651002 |
| 0.69460732 | 10.28863907 | 0.50651002 |

# CCH<sub>3</sub>

1.000000000000

|             |             |             |    |
|-------------|-------------|-------------|----|
| 9.97980000  | 0.00000000  | 0.00000000  |    |
| -0.76395804 | 12.66177393 | 0.00000000  |    |
| 0.00000004  | 0.00000004  | 19.64040000 |    |
| H           | C           | O           | Fe |
| 4           | 42          | 4           | 80 |

Cart

|             |             |             |
|-------------|-------------|-------------|
| 5.94647339  | 8.11635619  | 10.08880279 |
| 6.22847726  | 11.30810194 | 7.97086827  |
| 7.67776730  | 7.68845774  | 10.16210023 |
| 6.43965947  | 6.40395516  | 10.14010280 |
| 9.15643639  | 9.30467701  | 7.35047676  |
| 6.70276456  | 7.39539678  | 9.73903920  |
| 4.61603909  | 2.61986727  | 8.23061992  |
| 9.61576449  | 2.64187071  | 8.22510967  |
| 4.19685298  | 9.29333218  | 7.36728555  |
| 0.99593415  | 11.27274510 | 8.45909051  |
| 1.80009055  | 7.60497345  | 8.41286059  |
| 6.77560584  | 7.40854856  | 8.25123121  |
| 2.19965834  | 4.26722460  | 7.20385981  |
| 7.18233306  | 4.28428590  | 7.20377155  |
| 3.46530388  | 11.96139454 | 7.16483105  |
| 8.42600800  | 11.96694909 | 7.18070318  |
| -0.33145519 | 6.75954151  | 6.28260610  |
| 4.66289502  | 6.74301871  | 6.26685078  |

|             |             |            |
|-------------|-------------|------------|
| 1.74100714  | 1.62978255  | 6.17878014 |
| 6.73534619  | 1.63836644  | 6.17586012 |
| 2.17458614  | 8.28739508  | 5.57629341 |
| 7.16698571  | 8.29795103  | 5.53027191 |
| 9.19834266  | 3.14361235  | 5.29809606 |
| 4.20781986  | 3.13795917  | 5.30287494 |
| 4.67080144  | 10.81478211 | 4.26322156 |
| -0.31709272 | 10.82086879 | 4.26281910 |
| 6.72149391  | 5.69059447  | 4.00698346 |
| 1.73141576  | 5.69280760  | 4.01179046 |
| 7.17888818  | 12.35069123 | 3.63520531 |
| 2.18932213  | 12.35125701 | 3.64046860 |
| 9.22662205  | 7.20088301  | 3.32409275 |
| 4.23525994  | 7.20236639  | 3.32369764 |
| 5.47292232  | 2.23055553  | 2.34193015 |
| 0.48302215  | 2.23055553  | 2.34193015 |
| 6.73540354  | 9.72874641  | 2.00704742 |
| 1.74550355  | 9.72874641  | 2.00704742 |
| 7.98876715  | 3.77819967  | 1.47019899 |
| 2.99886727  | 3.77819967  | 1.47019899 |
| 9.21347809  | 11.29064846 | 1.28800344 |
| 4.22357798  | 11.29064846 | 1.28800344 |
| 5.52626467  | 6.13002825  | 0.45987183 |
| 0.53636485  | 6.13002825  | 0.45987183 |
| 7.45328903  | 1.12937152  | 0.40848067 |
| 2.46338916  | 1.12937152  | 0.40848067 |
| 4.75647831  | 8.73880577  | 0.18583304 |
| -0.23342146 | 8.73880577  | 0.18583304 |
| 1.59810699  | 7.42393942  | 9.57650703 |
| 4.77064857  | 2.45066535  | 9.40330431 |
| 9.75012007  | 2.47531270  | 9.40065504 |
| 1.23630007  | 11.35133902 | 9.62124503 |
| 2.54853700  | 10.29161181 | 7.19416046 |
| 0.00823129  | 10.94286840 | 6.97711154 |
| 3.17440799  | 7.78693756  | 7.11961926 |
| 8.16306230  | 7.79658847  | 7.08378771 |
| 0.68439413  | 12.41994782 | 4.91260807 |
| 7.50568787  | 0.09434834  | 7.05919097 |
| 3.86595703  | 5.17797362  | 7.01325324 |
| 8.85384439  | 5.18628390  | 7.02072933 |
| 3.21292656  | 2.72765242  | 6.92686287 |
| 8.20028886  | 2.73862210  | 6.92313483 |
| 0.69758505  | 8.31827396  | 6.92808424 |
| 5.69986576  | 8.30478241  | 6.95186429 |

|            |             |            |
|------------|-------------|------------|
| 5.00289278 | 10.91732197 | 6.89719664 |
| 7.51004718 | 10.29961400 | 7.16396660 |
| 1.37977606 | 5.90239623  | 6.79344420 |
| 6.36773108 | 5.95380569  | 6.93901239 |
| 0.70004257 | 3.29003033  | 6.73684544 |
| 5.68888483 | 3.29814841  | 6.74573685 |
| 0.00425756 | 0.90947215  | 6.68635326 |
| 5.01209919 | 0.90712213  | 6.68988475 |
| 3.24269632 | 11.77191201 | 5.18146018 |
| 8.22960957 | 11.77693967 | 5.18296109 |
| 8.88781695 | 9.25867529  | 5.10117999 |
| 3.87788593 | 9.25479786  | 5.10469975 |
| 7.50535005 | 4.24008761  | 5.05002854 |
| 2.52232873 | 4.23353677  | 5.04176675 |
| 8.20165995 | 6.75875640  | 4.89800141 |
| 3.20621052 | 6.76202215  | 4.90560425 |
| 5.67106889 | 12.42784556 | 4.89051877 |
| 2.54570246 | 0.10593379  | 7.07408522 |
| 3.23484956 | 1.47324071  | 4.84879199 |
| 8.22247391 | 1.48113946  | 4.84541169 |
| 1.40156607 | 9.91216918  | 4.84317655 |
| 6.38900576 | 9.90378634  | 4.81804370 |
| 5.01610430 | 4.86426458  | 4.75701365 |
| 0.02455387 | 4.85877305  | 4.74160253 |
| 0.72845808 | 7.29543734  | 4.69199786 |
| 5.71846055 | 7.29091226  | 4.69815334 |
| 5.75292260 | 2.19913927  | 4.51824409 |
| 0.76269717 | 2.19205050  | 4.51582535 |
| 8.92724419 | 3.16928101  | 3.13275409 |
| 3.93734455 | 3.16928101  | 3.13275409 |
| 9.65447807 | 0.51179242  | 2.92767382 |
| 4.66457796 | 0.51179242  | 2.92767382 |
| 8.19081593 | 10.75315189 | 2.92137337 |
| 3.20091629 | 10.75315189 | 2.92137337 |
| 7.52427816 | 8.16568470  | 2.89047265 |
| 2.53437829 | 8.16568470  | 2.89047265 |
| 6.46140337 | 3.88992119  | 2.81003308 |
| 1.47150326 | 3.88992119  | 2.81003308 |
| 8.23615360 | 5.59719324  | 2.75910425 |
| 3.24625349 | 5.59719324  | 2.75910425 |
| 5.72548342 | 11.29866314 | 2.69921899 |
| 0.73558354 | 11.29866314 | 2.69921899 |
| 5.02271366 | 8.84247589  | 2.64073300 |
| 0.03281343 | 8.84247589  | 2.64073300 |

|             |             |            |
|-------------|-------------|------------|
| 7.16234589  | 1.15467191  | 2.58495903 |
| 2.17244577  | 1.15467191  | 2.58495903 |
| 5.69094276  | 6.28061676  | 2.47308970 |
| 0.70104283  | 6.28061676  | 2.47308970 |
| 4.72644854  | 4.52631235  | 0.98044425 |
| -0.26345146 | 4.52631235  | 0.98044425 |
| 8.98416233  | 2.08401227  | 0.94984233 |
| 3.99426270  | 2.08401227  | 0.94984233 |
| 7.49692297  | 12.16127491 | 0.88189071 |
| 2.50702286  | 12.16127491 | 0.88189071 |
| 8.92881203  | 7.14167833  | 0.77916235 |
| 3.93891239  | 7.14167833  | 0.77916235 |
| 8.23179626  | 9.65808487  | 0.74752367 |
| 3.24189639  | 9.65808487  | 0.74752367 |
| 6.50168800  | 2.71004343  | 0.73384589 |
| 1.51178777  | 2.71004343  | 0.73384589 |
| 5.78449345  | 0.24636792  | 0.66762453 |
| 0.79459333  | 0.24636792  | 0.66762453 |
| 6.40908241  | 7.83185196  | 0.60482943 |
| 1.41918242  | 7.83185196  | 0.60482943 |
| 7.18588972  | 5.31081581  | 0.60368013 |
| 2.19598985  | 5.31081581  | 0.60368013 |
| 5.68450737  | 10.28863907 | 0.50651002 |
| 0.69460732  | 10.28863907 | 0.50651002 |

# TS for  $C_{cv} + CCH_3 \rightarrow CCCH_3_{cv}$

1.000000000000

|             |             |             |    |
|-------------|-------------|-------------|----|
| 9.97980000  | 0.00000000  | 0.00000000  |    |
| -0.76395804 | 12.66177393 | 0.00000000  |    |
| 0.00000004  | 0.00000004  | 19.64040000 |    |
| H           | C           | O           | Fe |
| 4           | 42          | 4           | 80 |

Cart

|            |             |             |
|------------|-------------|-------------|
| 0.19488182 | 9.38557485  | 10.13362647 |
| 6.21664972 | 11.33966580 | 7.98695113  |
| 0.36918017 | 11.14889961 | 9.91336296  |
| 1.80946757 | 10.13224012 | 10.14607858 |
| 9.15404823 | 9.35276712  | 7.40315630  |
| 0.81441130 | 10.17048604 | 9.67536798  |
| 4.60408418 | 2.61961636  | 8.23391853  |
| 9.60722285 | 2.60103750  | 8.21473076  |
| 4.18815817 | 9.29711301  | 7.36550344  |
| 6.77807292 | 7.72559475  | 8.45165556  |

|             |             |            |
|-------------|-------------|------------|
| 2.38200443  | 7.16858946  | 8.63557924 |
| 0.93701919  | 10.00787758 | 8.19404912 |
| 2.19484638  | 4.26805017  | 7.18754205 |
| 7.19181576  | 4.26801578  | 7.20927418 |
| 3.39268723  | 11.92072156 | 7.20365023 |
| 8.45129168  | 11.98078461 | 7.15281045 |
| -0.31762444 | 6.79738376  | 6.34481047 |
| 4.68743324  | 6.76359932  | 6.28801619 |
| 1.74408584  | 1.64280823  | 6.15401123 |
| 6.72128311  | 1.62194389  | 6.18553753 |
| 2.17119699  | 8.28148422  | 5.62827755 |
| 7.17008950  | 8.29251269  | 5.58924573 |
| 9.19684638  | 3.14060335  | 5.29632534 |
| 4.21231092  | 3.14609300  | 5.30724130 |
| 4.66549377  | 10.78457503 | 4.26434484 |
| -0.31783963 | 10.84128798 | 4.28604026 |
| 6.72822824  | 5.70050007  | 4.01342443 |
| 1.73488395  | 5.70365398  | 4.01750798 |
| 7.16666795  | 12.35188716 | 3.62430398 |
| 2.19768666  | 12.34893898 | 3.63323803 |
| 9.23157557  | 7.20226796  | 3.34344201 |
| 4.23776590  | 7.20466576  | 3.33433723 |
| 5.47292232  | 2.23055553  | 2.34193015 |
| 0.48302215  | 2.23055553  | 2.34193015 |
| 6.73540354  | 9.72874641  | 2.00704742 |
| 1.74550355  | 9.72874641  | 2.00704742 |
| 7.98876715  | 3.77819967  | 1.47019899 |
| 2.99886727  | 3.77819967  | 1.47019899 |
| 9.21347809  | 11.29064846 | 1.28800344 |
| 4.22357798  | 11.29064846 | 1.28800344 |
| 5.52626467  | 6.13002825  | 0.45987183 |
| 0.53636485  | 6.13002825  | 0.45987183 |
| 7.45328903  | 1.12937152  | 0.40848067 |
| 2.46338916  | 1.12937152  | 0.40848067 |
| 4.75647831  | 8.73880577  | 0.18583304 |
| -0.23342146 | 8.73880577  | 0.18583304 |
| 1.95129180  | 6.93569060  | 9.70601039 |
| 4.73607661  | 2.45461915  | 9.41096775 |
| 9.74943046  | 2.41484613  | 9.38687085 |
| 6.66602888  | 7.56374513  | 9.62787248 |
| 2.50555259  | 10.24480920 | 7.15604167 |
| -0.00382872 | 10.94855517 | 6.81203426 |
| 3.23209890  | 7.74524745  | 7.16989672 |
| 8.18925831  | 7.83181029  | 7.14244683 |

|            |             |            |
|------------|-------------|------------|
| 0.69278567 | 12.44270584 | 4.87430926 |
| 7.50702196 | 0.08949884  | 7.06226018 |
| 3.87045286 | 5.19025157  | 7.01759438 |
| 8.86923464 | 5.18343290  | 6.98781433 |
| 3.21438048 | 2.73540208  | 6.92404572 |
| 8.19681639 | 2.73282808  | 6.92086509 |
| 0.70643054 | 8.41455030  | 6.95405368 |
| 5.72845105 | 8.33363105  | 6.94722754 |
| 4.97067572 | 10.92688842 | 6.92509619 |
| 7.50104252 | 10.31860004 | 7.16999370 |
| 1.39986824 | 5.91997089  | 6.77480107 |
| 6.40207503 | 5.90567365  | 6.76635233 |
| 0.69481266 | 3.29127448  | 6.73299154 |
| 5.69187149 | 3.27482380  | 6.74728342 |
| 0.01182202 | 0.91826393  | 6.66475820 |
| 4.99176657 | 0.86957044  | 6.71658157 |
| 3.23923277 | 11.75435514 | 5.18434606 |
| 8.20770212 | 11.79385018 | 5.15896635 |
| 8.88683571 | 9.24733502  | 5.08793420 |
| 3.88941578 | 9.22280725  | 5.14201056 |
| 7.51183472 | 4.23602852  | 5.03777011 |
| 2.52101140 | 4.23699071  | 5.04185647 |
| 8.20488955 | 6.76493433  | 4.93281257 |
| 3.20873397 | 6.76430742  | 4.91899696 |
| 5.65520857 | 12.41902640 | 4.89712856 |
| 2.50644511 | 0.09437147  | 7.02090660 |
| 3.24224030 | 1.48654133  | 4.83951761 |
| 8.20522584 | 1.48569457  | 4.84106344 |
| 1.40690451 | 9.89431373  | 4.78918660 |
| 6.39609997 | 9.90435289  | 4.83108708 |
| 5.01684078 | 4.86033005  | 4.74735052 |
| 0.02653221 | 4.85606076  | 4.72463820 |
| 0.72655998 | 7.29502383  | 4.71718993 |
| 5.72090486 | 7.29962953  | 4.69788005 |
| 5.74885368 | 2.19300879  | 4.52035696 |
| 0.75911193 | 2.19853657  | 4.50676774 |
| 8.92724419 | 3.16928101  | 3.13275409 |
| 3.93734455 | 3.16928101  | 3.13275409 |
| 9.65447807 | 0.51179242  | 2.92767382 |
| 4.66457796 | 0.51179242  | 2.92767382 |
| 8.19081593 | 10.75315189 | 2.92137337 |
| 3.20091629 | 10.75315189 | 2.92137337 |
| 7.52427816 | 8.16568470  | 2.89047265 |
| 2.53437829 | 8.16568470  | 2.89047265 |

|             |             |            |
|-------------|-------------|------------|
| 6.46140337  | 3.88992119  | 2.81003308 |
| 1.47150326  | 3.88992119  | 2.81003308 |
| 8.23615360  | 5.59719324  | 2.75910425 |
| 3.24625349  | 5.59719324  | 2.75910425 |
| 5.72548342  | 11.29866314 | 2.69921899 |
| 0.73558354  | 11.29866314 | 2.69921899 |
| 5.02271366  | 8.84247589  | 2.64073300 |
| 0.03281343  | 8.84247589  | 2.64073300 |
| 7.16234589  | 1.15467191  | 2.58495903 |
| 2.17244577  | 1.15467191  | 2.58495903 |
| 5.69094276  | 6.28061676  | 2.47308970 |
| 0.70104283  | 6.28061676  | 2.47308970 |
| 4.72644854  | 4.52631235  | 0.98044425 |
| -0.26345146 | 4.52631235  | 0.98044425 |
| 8.98416233  | 2.08401227  | 0.94984233 |
| 3.99426270  | 2.08401227  | 0.94984233 |
| 7.49692297  | 12.16127491 | 0.88189071 |
| 2.50702286  | 12.16127491 | 0.88189071 |
| 8.92881203  | 7.14167833  | 0.77916235 |
| 3.93891239  | 7.14167833  | 0.77916235 |
| 8.23179626  | 9.65808487  | 0.74752367 |
| 3.24189639  | 9.65808487  | 0.74752367 |
| 6.50168800  | 2.71004343  | 0.73384589 |
| 1.51178777  | 2.71004343  | 0.73384589 |
| 5.78449345  | 0.24636792  | 0.66762453 |
| 0.79459333  | 0.24636792  | 0.66762453 |
| 6.40908241  | 7.83185196  | 0.60482943 |
| 1.41918242  | 7.83185196  | 0.60482943 |
| 7.18588972  | 5.31081581  | 0.60368013 |
| 2.19598985  | 5.31081581  | 0.60368013 |
| 5.68450737  | 10.28863907 | 0.50651002 |
| 0.69460732  | 10.28863907 | 0.50651002 |

# CCCH<sub>3</sub> CV

1.000000000000

|             |             |             |    |
|-------------|-------------|-------------|----|
| 9.97980000  | 0.00000000  | 0.00000000  |    |
| -0.76395804 | 12.66177393 | 0.00000000  |    |
| 0.00000004  | 0.00000004  | 19.64040000 |    |
| H           | C           | O           | Fe |
| 4           | 42          | 4           | 80 |

Cart

|            |             |             |
|------------|-------------|-------------|
| 0.17258935 | 9.44180689  | 10.49854960 |
| 6.22690057 | 11.26012947 | 7.95549206  |



|             |             |             |
|-------------|-------------|-------------|
| 0.62146058  | 11.10291964 | 10.03179334 |
| 1.85077000  | 9.82255641  | 10.00452647 |
| 9.19398474  | 9.33650665  | 7.83320382  |
| 0.79165443  | 10.03806736 | 9.81101624  |
| 4.59862222  | 2.66053726  | 8.23980791  |
| 9.61013046  | 2.65894518  | 8.22393369  |
| 4.14734640  | 9.26413763  | 7.37787573  |
| 6.79767994  | 7.39825242  | 8.39376667  |
| 2.36362805  | 7.09621481  | 8.61887045  |
| 0.41407866  | 9.77744851  | 8.38344112  |
| 2.18832283  | 4.24712468  | 7.17415031  |
| 7.18395613  | 4.26232568  | 7.18741031  |
| 3.36443491  | 11.89885158 | 7.21406670  |
| 8.43815770  | 11.91696087 | 7.12957496  |
| -0.34954978 | 6.79644953  | 6.32562471  |
| 4.67846311  | 6.73367301  | 6.27377322  |
| 1.73427333  | 1.62332664  | 6.14747223  |
| 6.71496495  | 1.59192028  | 6.20514584  |
| 2.14480821  | 8.27141874  | 5.63456395  |
| 7.18306860  | 8.33823663  | 5.65679251  |
| 9.18686623  | 3.13184914  | 5.29249875  |
| 4.20765887  | 3.13607529  | 5.30395367  |
| 4.65531745  | 10.77878736 | 4.26614298  |
| -0.31160544 | 10.83806496 | 4.30408535  |
| 6.72250880  | 5.70624449  | 4.01501669  |
| 1.73269274  | 5.69355088  | 4.01663035  |
| 7.16298494  | 12.35129554 | 3.63017474  |
| 2.19865610  | 12.34755812 | 3.63797210  |
| 9.22529536  | 7.20926816  | 3.35022153  |
| 4.23749471  | 7.20399200  | 3.33457903  |
| 5.47292232  | 2.23055553  | 2.34193015  |
| 0.48302215  | 2.23055553  | 2.34193015  |
| 6.73540354  | 9.72874641  | 2.00704742  |
| 1.74550355  | 9.72874641  | 2.00704742  |
| 7.98876715  | 3.77819967  | 1.47019899  |
| 2.99886727  | 3.77819967  | 1.47019899  |
| 9.21347809  | 11.29064846 | 1.28800344  |
| 4.22357798  | 11.29064846 | 1.28800344  |
| 5.52626467  | 6.13002825  | 0.45987183  |
| 0.53636485  | 6.13002825  | 0.45987183  |
| 7.45328903  | 1.12937152  | 0.40848067  |
| 2.46338916  | 1.12937152  | 0.40848067  |
| 4.75647831  | 8.73880577  | 0.18583304  |
| -0.23342146 | 8.73880577  | 0.18583304  |

|             |             |            |
|-------------|-------------|------------|
| 1.91014722  | 6.81599467  | 9.66985209 |
| 4.71477527  | 2.52753081  | 9.42059732 |
| 9.71832482  | 2.51333528  | 9.40480663 |
| 6.58810594  | 7.15992369  | 9.54762119 |
| 2.41603696  | 10.20305058 | 7.18058211 |
| -0.00346182 | 10.89970876 | 6.74451127 |
| 3.19849090  | 7.71842170  | 7.16757718 |
| 8.20108278  | 7.83627525  | 7.17717544 |
| 0.69004035  | 12.44062280 | 4.87304383 |
| 7.50213666  | 0.04062279  | 7.06022564 |
| 3.85911742  | 5.17445056  | 7.02168196 |
| 8.87738375  | 5.15972016  | 6.98123164 |
| 3.20651402  | 2.71905277  | 6.91900771 |
| 8.18627556  | 2.71699248  | 6.91887977 |
| 0.65937090  | 8.36496816  | 6.92628887 |
| 5.70487572  | 8.30520458  | 6.97967767 |
| 4.92879020  | 10.89180652 | 6.94778294 |
| 7.50648521  | 10.23034886 | 7.09292645 |
| 1.37714003  | 5.88409153  | 6.74816277 |
| 6.40166573  | 5.91518154  | 6.80149559 |
| 0.68247872  | 3.27405854  | 6.72823299 |
| 5.68530938  | 3.26282798  | 6.74376080 |
| 0.00226256  | 0.87811190  | 6.67514792 |
| 4.97595057  | 0.84801055  | 6.71811327 |
| 3.22801877  | 11.73560416 | 5.19804553 |
| 8.20599723  | 11.77515795 | 5.15383596 |
| 8.86947543  | 9.20555541  | 4.98682210 |
| 3.86833235  | 9.21705361  | 5.15544840 |
| 7.50375479  | 4.23434465  | 5.03777150 |
| 2.51661701  | 4.22301790  | 5.03477282 |
| 8.18444000  | 6.76407536  | 4.94702470 |
| 3.20457981  | 6.76198164  | 4.91408028 |
| 5.64827685  | 12.40741572 | 4.90627423 |
| 2.48080645  | 0.06322190  | 7.01977059 |
| 3.23969340  | 1.47451928  | 4.83640704 |
| 8.20244486  | 1.46967753  | 4.84601726 |
| 1.40042279  | 9.86936636  | 4.76299622 |
| 6.37998997  | 9.89149420  | 4.80642385 |
| 5.01371719  | 4.86590281  | 4.76453675 |
| 0.01809219  | 4.84770282  | 4.71834346 |
| 0.72140012  | 7.28666101  | 4.70094059 |
| 5.72661916  | 7.32062645  | 4.70704185 |
| 5.74808183  | 2.18250854  | 4.52375930 |
| 0.75173276  | 2.18951479  | 4.50594958 |

|             |             |            |
|-------------|-------------|------------|
| 8.92724419  | 3.16928101  | 3.13275409 |
| 3.93734455  | 3.16928101  | 3.13275409 |
| 9.65447807  | 0.51179242  | 2.92767382 |
| 4.66457796  | 0.51179242  | 2.92767382 |
| 8.19081593  | 10.75315189 | 2.92137337 |
| 3.20091629  | 10.75315189 | 2.92137337 |
| 7.52427816  | 8.16568470  | 2.89047265 |
| 2.53437829  | 8.16568470  | 2.89047265 |
| 6.46140337  | 3.88992119  | 2.81003308 |
| 1.47150326  | 3.88992119  | 2.81003308 |
| 8.23615360  | 5.59719324  | 2.75910425 |
| 3.24625349  | 5.59719324  | 2.75910425 |
| 5.72548342  | 11.29866314 | 2.69921899 |
| 0.73558354  | 11.29866314 | 2.69921899 |
| 5.02271366  | 8.84247589  | 2.64073300 |
| 0.03281343  | 8.84247589  | 2.64073300 |
| 7.16234589  | 1.15467191  | 2.58495903 |
| 2.17244577  | 1.15467191  | 2.58495903 |
| 5.69094276  | 6.28061676  | 2.47308970 |
| 0.70104283  | 6.28061676  | 2.47308970 |
| 4.72644854  | 4.52631235  | 0.98044425 |
| -0.26345146 | 4.52631235  | 0.98044425 |
| 8.98416233  | 2.08401227  | 0.94984233 |
| 3.99426270  | 2.08401227  | 0.94984233 |
| 7.49692297  | 12.16127491 | 0.88189071 |
| 2.50702286  | 12.16127491 | 0.88189071 |
| 8.92881203  | 7.14167833  | 0.77916235 |
| 3.93891239  | 7.14167833  | 0.77916235 |
| 8.23179626  | 9.65808487  | 0.74752367 |
| 3.24189639  | 9.65808487  | 0.74752367 |
| 6.50168800  | 2.71004343  | 0.73384589 |
| 1.51178777  | 2.71004343  | 0.73384589 |
| 5.78449345  | 0.24636792  | 0.66762453 |
| 0.79459333  | 0.24636792  | 0.66762453 |
| 6.40908241  | 7.83185196  | 0.60482943 |
| 1.41918242  | 7.83185196  | 0.60482943 |
| 7.18588972  | 5.31081581  | 0.60368013 |
| 2.19598985  | 5.31081581  | 0.60368013 |
| 5.68450737  | 10.28863907 | 0.50651002 |
| 0.69460732  | 10.28863907 | 0.50651002 |

# CCH<sub>3</sub>+CH<sub>Cv</sub>

1.000000000000

|             |             |             |    |
|-------------|-------------|-------------|----|
| 9.97980000  | 0.00000000  | 0.00000000  |    |
| -0.76395804 | 12.66177393 | 0.00000000  |    |
| 0.00000004  | 0.00000004  | 19.64040000 |    |
| H           | C           | O           | Fe |
| 5           | 42          | 4           | 80 |

Cart

|             |             |             |
|-------------|-------------|-------------|
| 5.93165874  | 8.07522833  | 10.12325773 |
| 6.20334985  | 11.25585981 | 7.92503958  |
| 4.26972037  | 9.46639884  | 9.02069629  |
| 7.66922480  | 7.65267911  | 10.17192140 |
| 6.43794426  | 6.36664500  | 10.10357019 |
| 9.14881671  | 9.29794530  | 7.36010133  |
| 6.69220682  | 7.37389318  | 9.74221880  |
| 4.61563454  | 2.62427817  | 8.22753541  |
| 9.61770828  | 2.65712051  | 8.22066232  |
| 4.23720227  | 9.26719203  | 7.93466538  |
| 0.95425833  | 11.26688230 | 8.47625429  |
| 1.85283910  | 7.56569227  | 8.42297515  |
| 6.74936474  | 7.44796788  | 8.25727862  |
| 2.19982762  | 4.27719104  | 7.19332083  |
| 7.17322312  | 4.29091756  | 7.19730611  |
| 3.47373468  | 11.90526732 | 7.12227868  |
| 8.40989723  | 11.95339841 | 7.17902915  |
| -0.32851063 | 6.75557429  | 6.28370945  |
| 4.65019573  | 6.79492378  | 6.27058785  |
| 1.73860399  | 1.62612464  | 6.19269797  |
| 6.72999158  | 1.62465684  | 6.18252146  |
| 2.20119256  | 8.33715796  | 5.63672484  |
| 7.16427062  | 8.29905271  | 5.53488717  |
| 9.19885612  | 3.15023851  | 5.29687454  |
| 4.20221416  | 3.13908385  | 5.30070858  |
| 4.68294233  | 10.82490665 | 4.27657673  |
| -0.32020242 | 10.82159191 | 4.26246955  |
| 6.72253489  | 5.69325889  | 4.00720278  |
| 1.73138702  | 5.70466824  | 4.01296078  |
| 7.18203060  | 12.35034022 | 3.63380105  |
| 2.18495034  | 12.35292263 | 3.64099088  |
| 9.22911748  | 7.20001049  | 3.32541775  |
| 4.23614718  | 7.21151743  | 3.33716186  |
| 5.47292232  | 2.23055553  | 2.34193015  |
| 0.48302215  | 2.23055553  | 2.34193015  |
| 6.73540354  | 9.72874641  | 2.00704742  |
| 1.74550355  | 9.72874641  | 2.00704742  |
| 7.98876715  | 3.77819967  | 1.47019899  |

|             |             |            |
|-------------|-------------|------------|
| 2.99886727  | 3.77819967  | 1.47019899 |
| 9.21347809  | 11.29064846 | 1.28800344 |
| 4.22357798  | 11.29064846 | 1.28800344 |
| 5.52626467  | 6.13002825  | 0.45987183 |
| 0.53636485  | 6.13002825  | 0.45987183 |
| 7.45328903  | 1.12937152  | 0.40848067 |
| 2.46338916  | 1.12937152  | 0.40848067 |
| 4.75647831  | 8.73880577  | 0.18583304 |
| -0.23342146 | 8.73880577  | 0.18583304 |
| 1.59412547  | 7.36450838  | 9.57116778 |
| 4.76247639  | 2.45364979  | 9.40197686 |
| 9.72992400  | 2.48897391  | 9.39891955 |
| 1.26803047  | 11.34070564 | 9.61685720 |
| 2.59313810  | 10.20621318 | 7.09749664 |
| 0.00019528  | 10.93651204 | 6.99605260 |
| 3.20874637  | 7.81945137  | 7.14357362 |
| 8.14761206  | 7.79525989  | 7.08542848 |
| 0.68131492  | 12.41746145 | 4.91738852 |
| 7.48541637  | 0.06271521  | 7.05845459 |
| 3.87499801  | 5.18556482  | 6.99449289 |
| 8.84808938  | 5.18572605  | 7.01994409 |
| 3.21025426  | 2.73231253  | 6.92548379 |
| 8.19189875  | 2.73852778  | 6.92048340 |
| 0.69815443  | 8.31887377  | 6.94093776 |
| 5.65565298  | 8.33036691  | 6.96340043 |
| 4.98525193  | 10.81110361 | 6.83379661 |
| 7.49531320  | 10.28129682 | 7.15565187 |
| 1.39392096  | 5.92378314  | 6.79715668 |
| 6.35529148  | 5.96147094  | 6.93983556 |
| 0.69822078  | 3.29452940  | 6.73673570 |
| 5.68423698  | 3.29042658  | 6.74241959 |
| 0.00079650  | 0.90128147  | 6.69121062 |
| 5.00100077  | 0.88300290  | 6.68667716 |
| 3.24698856  | 11.76837696 | 5.16324164 |
| 8.22900279  | 11.77030518 | 5.18400861 |
| 8.88951159  | 9.25446428  | 5.09864887 |
| 3.87432926  | 9.20622395  | 4.97485368 |
| 7.50473779  | 4.24185119  | 5.04760506 |
| 2.51795546  | 4.23785135  | 5.03899991 |
| 8.20699271  | 6.76302084  | 4.89847779 |
| 3.19467348  | 6.76024907  | 4.91613011 |
| 5.67662430  | 12.43417509 | 4.88954914 |
| 2.55818134  | 0.08755917  | 7.05662412 |
| 3.23072580  | 1.47333944  | 4.85157703 |

|             |             |            |
|-------------|-------------|------------|
| 8.22458862  | 1.48047738  | 4.84936463 |
| 1.39810015  | 9.90426212  | 4.79917130 |
| 6.38918263  | 9.88892119  | 4.79317596 |
| 5.01622550  | 4.86259293  | 4.74947375 |
| 0.02684837  | 4.87261061  | 4.75063373 |
| 0.73831165  | 7.32829420  | 4.69367756 |
| 5.72182814  | 7.28797634  | 4.69955264 |
| 5.75164431  | 2.19827723  | 4.51908793 |
| 0.76175332  | 2.18913101  | 4.52176361 |
| 8.92724419  | 3.16928101  | 3.13275409 |
| 3.93734455  | 3.16928101  | 3.13275409 |
| 9.65447807  | 0.51179242  | 2.92767382 |
| 4.66457796  | 0.51179242  | 2.92767382 |
| 8.19081593  | 10.75315189 | 2.92137337 |
| 3.20091629  | 10.75315189 | 2.92137337 |
| 7.52427816  | 8.16568470  | 2.89047265 |
| 2.53437829  | 8.16568470  | 2.89047265 |
| 6.46140337  | 3.88992119  | 2.81003308 |
| 1.47150326  | 3.88992119  | 2.81003308 |
| 8.23615360  | 5.59719324  | 2.75910425 |
| 3.24625349  | 5.59719324  | 2.75910425 |
| 5.72548342  | 11.29866314 | 2.69921899 |
| 0.73558354  | 11.29866314 | 2.69921899 |
| 5.02271366  | 8.84247589  | 2.64073300 |
| 0.03281343  | 8.84247589  | 2.64073300 |
| 7.16234589  | 1.15467191  | 2.58495903 |
| 2.17244577  | 1.15467191  | 2.58495903 |
| 5.69094276  | 6.28061676  | 2.47308970 |
| 0.70104283  | 6.28061676  | 2.47308970 |
| 4.72644854  | 4.52631235  | 0.98044425 |
| -0.26345146 | 4.52631235  | 0.98044425 |
| 8.98416233  | 2.08401227  | 0.94984233 |
| 3.99426270  | 2.08401227  | 0.94984233 |
| 7.49692297  | 12.16127491 | 0.88189071 |
| 2.50702286  | 12.16127491 | 0.88189071 |
| 8.92881203  | 7.14167833  | 0.77916235 |
| 3.93891239  | 7.14167833  | 0.77916235 |
| 8.23179626  | 9.65808487  | 0.74752367 |
| 3.24189639  | 9.65808487  | 0.74752367 |
| 6.50168800  | 2.71004343  | 0.73384589 |
| 1.51178777  | 2.71004343  | 0.73384589 |
| 5.78449345  | 0.24636792  | 0.66762453 |
| 0.79459333  | 0.24636792  | 0.66762453 |
| 6.40908241  | 7.83185196  | 0.60482943 |

|            |             |            |
|------------|-------------|------------|
| 1.41918242 | 7.83185196  | 0.60482943 |
| 7.18588972 | 5.31081581  | 0.60368013 |
| 2.19598985 | 5.31081581  | 0.60368013 |
| 5.68450737 | 10.28863907 | 0.50651002 |
| 0.69460732 | 10.28863907 | 0.50651002 |

# TS for CCH<sub>3</sub>+CH<sub>CV</sub>->CHCCH<sub>3</sub> CV

1.000000000000

|             |             |             |    |
|-------------|-------------|-------------|----|
| 9.97980000  | 0.00000000  | 0.00000000  |    |
| -0.76395804 | 12.66177393 | 0.00000000  |    |
| 0.00000004  | 0.00000004  | 19.64040000 |    |
| H           | C           | O           | Fe |
| 5           | 42          | 4           | 80 |

Cart

|             |             |             |
|-------------|-------------|-------------|
| 8.99898530  | 9.50102893  | 9.07876344  |
| 0.91143963  | 9.68404564  | 10.32086764 |
| 6.25516460  | 11.27502774 | 7.92740817  |
| 0.40208082  | 11.34579378 | 9.88257226  |
| 2.12030366  | 10.90372188 | 9.87226551  |
| 9.15568744  | 9.30336592  | 8.00791288  |
| 1.10860205  | 10.53260484 | 9.65006062  |
| 4.60402383  | 2.59959631  | 8.22315726  |
| 9.60673485  | 2.58263746  | 8.21338783  |
| 4.19905730  | 9.28810495  | 7.41240923  |
| 6.84869966  | 7.65807849  | 8.46143844  |
| 1.79062436  | 7.39714526  | 8.44106997  |
| 1.00537028  | 10.16413410 | 8.19830877  |
| 2.19499484  | 4.26780207  | 7.18875066  |
| 7.19109415  | 4.26255358  | 7.20007973  |
| 3.40128705  | 11.89981011 | 7.16608204  |
| 8.47494293  | 11.89550645 | 7.12549773  |
| -0.32257003 | 6.84241649  | 6.34676410  |
| 4.67442775  | 6.75803008  | 6.32957262  |
| 1.73702594  | 1.61348441  | 6.16788598  |
| 6.72539449  | 1.59730223  | 6.19830882  |
| 2.16772277  | 8.30596850  | 5.67608339  |
| 7.19283512  | 8.33786397  | 5.65644912  |
| 9.19536068  | 3.14283560  | 5.29560242  |
| 4.20768898  | 3.14542788  | 5.30418207  |
| 4.67250172  | 10.80164739 | 4.26723174  |
| -0.30914248 | 10.82822333 | 4.29082712  |
| 6.72762390  | 5.70874336  | 4.01603888  |
| 1.73586714  | 5.71528206  | 4.02320601  |

|             |             |            |
|-------------|-------------|------------|
| 7.17092426  | 12.35164766 | 3.62416213 |
| 2.19253205  | 12.35018482 | 3.63098995 |
| 9.23748489  | 7.21414112  | 3.37039251 |
| 4.24177295  | 7.20396736  | 3.36163652 |
| 5.47292232  | 2.23055553  | 2.34193015 |
| 0.48302215  | 2.23055553  | 2.34193015 |
| 6.73540354  | 9.72874641  | 2.00704742 |
| 1.74550355  | 9.72874641  | 2.00704742 |
| 7.98876715  | 3.77819967  | 1.47019899 |
| 2.99886727  | 3.77819967  | 1.47019899 |
| 9.21347809  | 11.29064846 | 1.28800344 |
| 4.22357798  | 11.29064846 | 1.28800344 |
| 5.52626467  | 6.13002825  | 0.45987183 |
| 0.53636485  | 6.13002825  | 0.45987183 |
| 7.45328903  | 1.12937152  | 0.40848067 |
| 2.46338916  | 1.12937152  | 0.40848067 |
| 4.75647831  | 8.73880577  | 0.18583304 |
| -0.23342146 | 8.73880577  | 0.18583304 |
| 1.70223464  | 7.13815737  | 9.60609897 |
| 4.72273319  | 2.42328878  | 9.40025242 |
| 9.74883687  | 2.39218518  | 9.38627376 |
| 6.68849060  | 7.48951471  | 9.63105567 |
| 2.52733973  | 10.21403100 | 7.09067769 |
| -0.03223092 | 10.79596940 | 6.77466494 |
| 3.21359069  | 7.76181181  | 7.16452345 |
| 8.22731095  | 7.84950051  | 7.16084803 |
| 0.68593127  | 12.43165234 | 4.88185719 |
| 7.53380839  | 0.04761774  | 7.05034629 |
| 3.87746636  | 5.15471604  | 6.99675887 |
| 8.87010805  | 5.18338246  | 6.97226382 |
| 3.20291879  | 2.71624510  | 6.91775245 |
| 8.19707482  | 2.72290630  | 6.92047610 |
| 0.71308944  | 8.38528446  | 7.11382113 |
| 5.71967279  | 8.31703236  | 6.97801182 |
| 4.97963442  | 10.90038125 | 6.89701143 |
| 7.52436811  | 10.22624369 | 7.05998445 |
| 1.36760998  | 5.91702524  | 6.83045716 |
| 6.40250115  | 5.91297130  | 6.79498948 |
| 0.69324078  | 3.27553738  | 6.73441034 |
| 5.69248274  | 3.26380558  | 6.74661055 |
| 0.00537371  | 0.87725721  | 6.68028311 |
| 4.99239045  | 0.85757445  | 6.71848918 |
| 3.23963231  | 11.75260914 | 5.17239237 |
| 8.22141546  | 11.77823992 | 5.14869736 |



|             |             |            |
|-------------|-------------|------------|
| 8.87670133  | 9.19297077  | 4.96248024 |
| 3.89331989  | 9.21587388  | 5.07351836 |
| 7.50623670  | 4.23451609  | 5.03887255 |
| 2.51557398  | 4.24025920  | 5.04534080 |
| 8.19186941  | 6.75917927  | 4.94042685 |
| 3.20051355  | 6.76658030  | 4.93624292 |
| 5.66597193  | 12.42265288 | 4.89652587 |
| 2.48844351  | 0.03663549  | 7.00908557 |
| 3.23673856  | 1.47800340  | 4.84061371 |
| 8.21197792  | 1.47936833  | 4.84585461 |
| 1.39974307  | 9.86585378  | 4.77976849 |
| 6.39371509  | 9.87941419  | 4.76963531 |
| 5.02024954  | 4.86310710  | 4.74487326 |
| 0.03147519  | 4.85886024  | 4.73114829 |
| 0.72568337  | 7.30651312  | 4.75599542 |
| 5.72439290  | 7.31425619  | 4.71716489 |
| 5.74795003  | 2.18758538  | 4.52593711 |
| 0.75939233  | 2.19442699  | 4.51286697 |
| 8.92724419  | 3.16928101  | 3.13275409 |
| 3.93734455  | 3.16928101  | 3.13275409 |
| 9.65447807  | 0.51179242  | 2.92767382 |
| 4.66457796  | 0.51179242  | 2.92767382 |
| 8.19081593  | 10.75315189 | 2.92137337 |
| 3.20091629  | 10.75315189 | 2.92137337 |
| 7.52427816  | 8.16568470  | 2.89047265 |
| 2.53437829  | 8.16568470  | 2.89047265 |
| 6.46140337  | 3.88992119  | 2.81003308 |
| 1.47150326  | 3.88992119  | 2.81003308 |
| 8.23615360  | 5.59719324  | 2.75910425 |
| 3.24625349  | 5.59719324  | 2.75910425 |
| 5.72548342  | 11.29866314 | 2.69921899 |
| 0.73558354  | 11.29866314 | 2.69921899 |
| 5.02271366  | 8.84247589  | 2.64073300 |
| 0.03281343  | 8.84247589  | 2.64073300 |
| 7.16234589  | 1.15467191  | 2.58495903 |
| 2.17244577  | 1.15467191  | 2.58495903 |
| 5.69094276  | 6.28061676  | 2.47308970 |
| 0.70104283  | 6.28061676  | 2.47308970 |
| 4.72644854  | 4.52631235  | 0.98044425 |
| -0.26345146 | 4.52631235  | 0.98044425 |
| 8.98416233  | 2.08401227  | 0.94984233 |
| 3.99426270  | 2.08401227  | 0.94984233 |
| 7.49692297  | 12.16127491 | 0.88189071 |
| 2.50702286  | 12.16127491 | 0.88189071 |

|            |             |            |
|------------|-------------|------------|
| 8.92881203 | 7.14167833  | 0.77916235 |
| 3.93891239 | 7.14167833  | 0.77916235 |
| 8.23179626 | 9.65808487  | 0.74752367 |
| 3.24189639 | 9.65808487  | 0.74752367 |
| 6.50168800 | 2.71004343  | 0.73384589 |
| 1.51178777 | 2.71004343  | 0.73384589 |
| 5.78449345 | 0.24636792  | 0.66762453 |
| 0.79459333 | 0.24636792  | 0.66762453 |
| 6.40908241 | 7.83185196  | 0.60482943 |
| 1.41918242 | 7.83185196  | 0.60482943 |
| 7.18588972 | 5.31081581  | 0.60368013 |
| 2.19598985 | 5.31081581  | 0.60368013 |
| 5.68450737 | 10.28863907 | 0.50651002 |
| 0.69460732 | 10.28863907 | 0.50651002 |

# CHCCH<sub>3</sub> cv

1.000000000000

|             |             |             |    |
|-------------|-------------|-------------|----|
| 9.97980000  | 0.00000000  | 0.00000000  |    |
| -0.76395804 | 12.66177393 | 0.00000000  |    |
| 0.00000004  | 0.00000004  | 19.64040000 |    |
| H           | C           | O           | Fe |
| 5           | 42          | 4           | 80 |

Cart

|             |             |             |
|-------------|-------------|-------------|
| 8.79285974  | 9.27052976  | 9.12519880  |
| 0.84381933  | 9.44851619  | 10.41743291 |
| 6.21183185  | 11.26443617 | 7.93965332  |
| 0.73965915  | 11.17721017 | 9.96341648  |
| 2.26393360  | 10.29522870 | 9.74306581  |
| 9.32120735  | 9.29591779  | 8.14975083  |
| 1.16916996  | 10.20280565 | 9.68509302  |
| 4.59333810  | 2.62485257  | 8.23274490  |
| 9.59392914  | 2.67019001  | 8.22937210  |
| 4.16613045  | 9.25168570  | 7.40061557  |
| 6.71440662  | 7.63585448  | 8.42491098  |
| 1.88437659  | 7.18916386  | 8.38947270  |
| 0.67492688  | 9.83945599  | 8.30600411  |
| 2.18935381  | 4.23014933  | 7.18006921  |
| 7.17418505  | 4.24979371  | 7.20092112  |
| 3.35570086  | 11.88381907 | 7.19478326  |
| 8.43988713  | 11.89514992 | 7.12832273  |
| -0.33939186 | 6.79910889  | 6.34432034  |
| 4.67665309  | 6.71154540  | 6.29107032  |
| 1.72414805  | 1.60663324  | 6.14791167  |

|             |             |            |
|-------------|-------------|------------|
| 6.71045747  | 1.58011238  | 6.20630192 |
| 2.17016566  | 8.26490764  | 5.65296220 |
| 7.18059703  | 8.33987974  | 5.65616613 |
| 9.18098221  | 3.12459338  | 5.29266783 |
| 4.20159756  | 3.13356201  | 5.30505205 |
| 4.65844905  | 10.78696111 | 4.26397341 |
| -0.31410472 | 10.82692137 | 4.30828836 |
| 6.72047701  | 5.70462811  | 4.01275595 |
| 1.73161642  | 5.69576457  | 4.01924384 |
| 7.16211185  | 12.35065270 | 3.62757554 |
| 2.19575798  | 12.34734231 | 3.63820868 |
| 9.23017974  | 7.21078062  | 3.36990556 |
| 4.23684839  | 7.20331083  | 3.34364213 |
| 5.47292232  | 2.23055553  | 2.34193015 |
| 0.48302215  | 2.23055553  | 2.34193015 |
| 6.73540354  | 9.72874641  | 2.00704742 |
| 1.74550355  | 9.72874641  | 2.00704742 |
| 7.98876715  | 3.77819967  | 1.47019899 |
| 2.99886727  | 3.77819967  | 1.47019899 |
| 9.21347809  | 11.29064846 | 1.28800344 |
| 4.22357798  | 11.29064846 | 1.28800344 |
| 5.52626467  | 6.13002825  | 0.45987183 |
| 0.53636485  | 6.13002825  | 0.45987183 |
| 7.45328903  | 1.12937152  | 0.40848067 |
| 2.46338916  | 1.12937152  | 0.40848067 |
| 4.75647831  | 8.73880577  | 0.18583304 |
| -0.23342146 | 8.73880577  | 0.18583304 |
| 1.70115972  | 6.92254613  | 9.54406103 |
| 4.70137252  | 2.48723645  | 9.41344100 |
| 9.70467055  | 2.53986428  | 9.41089927 |
| 6.67063504  | 7.44353795  | 9.60218426 |
| 2.43132363  | 10.18039977 | 7.17525452 |
| -0.05231375 | 10.82273303 | 6.75624074 |
| 3.22277144  | 7.70470652  | 7.14807278 |
| 8.22896728  | 7.86388085  | 7.16647943 |
| 0.68319336  | 12.42818414 | 4.87627406 |
| 7.50266677  | 0.03313380  | 7.06223440 |
| 3.86664393  | 5.12913922  | 7.00140372 |
| 8.86114471  | 5.15346544  | 6.97296715 |
| 3.19548271  | 2.69176465  | 6.91481950 |
| 8.17806967  | 2.71113676  | 6.91963495 |
| 0.75895846  | 8.25234192  | 7.05113226 |
| 5.69862993  | 8.30715481  | 6.96670194 |
| 4.92313796  | 10.88045458 | 6.92506652 |

|             |             |            |
|-------------|-------------|------------|
| 7.47469627  | 10.22585093 | 7.06025383 |
| 1.36257748  | 5.86044452  | 6.79250296 |
| 6.40299463  | 5.90737797  | 6.80265999 |
| 0.67718668  | 3.26064230  | 6.72900657 |
| 5.68086476  | 3.24985956  | 6.74850712 |
| -0.00834548 | 0.86551319  | 6.67417042 |
| 4.97216215  | 0.83627058  | 6.72563491 |
| 3.21971743  | 11.72419920 | 5.19520072 |
| 8.20958083  | 11.77635019 | 5.15106543 |
| 8.86901625  | 9.18869972  | 4.96323831 |
| 3.87278629  | 9.21597436  | 5.10291103 |
| 7.49638121  | 4.22653119  | 5.03326539 |
| 2.51024846  | 4.21400321  | 5.03349696 |
| 8.17714561  | 6.75554153  | 4.95755805 |
| 3.20568771  | 6.75314397  | 4.91488164 |
| 5.64968182  | 12.40124741 | 4.90920472 |
| 2.46622145  | 0.03899433  | 7.00564443 |
| 3.23630960  | 1.46385680  | 4.83297575 |
| 8.19777070  | 1.46446911  | 4.84640182 |
| 1.38880151  | 9.84499139  | 4.78784576 |
| 6.38363249  | 9.88456990  | 4.79174661 |
| 5.01709557  | 4.85953689  | 4.76248841 |
| 0.01910029  | 4.84617487  | 4.73375488 |
| 0.72135183  | 7.28060181  | 4.73413763 |
| 5.72412100  | 7.31464647  | 4.70598114 |
| 5.74146521  | 2.17538927  | 4.52819561 |
| 0.75000713  | 2.18673201  | 4.50537176 |
| 8.92724419  | 3.16928101  | 3.13275409 |
| 3.93734455  | 3.16928101  | 3.13275409 |
| 9.65447807  | 0.51179242  | 2.92767382 |
| 4.66457796  | 0.51179242  | 2.92767382 |
| 8.19081593  | 10.75315189 | 2.92137337 |
| 3.20091629  | 10.75315189 | 2.92137337 |
| 7.52427816  | 8.16568470  | 2.89047265 |
| 2.53437829  | 8.16568470  | 2.89047265 |
| 6.46140337  | 3.88992119  | 2.81003308 |
| 1.47150326  | 3.88992119  | 2.81003308 |
| 8.23615360  | 5.59719324  | 2.75910425 |
| 3.24625349  | 5.59719324  | 2.75910425 |
| 5.72548342  | 11.29866314 | 2.69921899 |
| 0.73558354  | 11.29866314 | 2.69921899 |
| 5.02271366  | 8.84247589  | 2.64073300 |
| 0.03281343  | 8.84247589  | 2.64073300 |
| 7.16234589  | 1.15467191  | 2.58495903 |

|             |             |            |
|-------------|-------------|------------|
| 2.17244577  | 1.15467191  | 2.58495903 |
| 5.69094276  | 6.28061676  | 2.47308970 |
| 0.70104283  | 6.28061676  | 2.47308970 |
| 4.72644854  | 4.52631235  | 0.98044425 |
| -0.26345146 | 4.52631235  | 0.98044425 |
| 8.98416233  | 2.08401227  | 0.94984233 |
| 3.99426270  | 2.08401227  | 0.94984233 |
| 7.49692297  | 12.16127491 | 0.88189071 |
| 2.50702286  | 12.16127491 | 0.88189071 |
| 8.92881203  | 7.14167833  | 0.77916235 |
| 3.93891239  | 7.14167833  | 0.77916235 |
| 8.23179626  | 9.65808487  | 0.74752367 |
| 3.24189639  | 9.65808487  | 0.74752367 |
| 6.50168800  | 2.71004343  | 0.73384589 |
| 1.51178777  | 2.71004343  | 0.73384589 |
| 5.78449345  | 0.24636792  | 0.66762453 |
| 0.79459333  | 0.24636792  | 0.66762453 |
| 6.40908241  | 7.83185196  | 0.60482943 |
| 1.41918242  | 7.83185196  | 0.60482943 |
| 7.18588972  | 5.31081581  | 0.60368013 |
| 2.19598985  | 5.31081581  | 0.60368013 |
| 5.68450737  | 10.28863907 | 0.50651002 |
| 0.69460732  | 10.28863907 | 0.50651002 |

# TS for H+CCH<sub>2</sub>cv->CHCH<sub>2</sub>cv

1.000000000000

|             |             |             |    |
|-------------|-------------|-------------|----|
| 9.97980000  | 0.00000000  | 0.00000000  |    |
| -0.76395804 | 12.66177393 | 0.00000000  |    |
| 0.00000004  | 0.00000004  | 19.64040000 |    |
| H           | C           | O           | Fe |
| 3           | 41          | 4           | 80 |

Cart

|             |             |            |
|-------------|-------------|------------|
| 8.10443883  | 9.30925348  | 9.67928573 |
| 9.27701511  | 7.89161310  | 9.68651454 |
| 0.11079949  | 10.56911505 | 8.42412682 |
| 8.85290782  | 8.73397952  | 9.12485444 |
| 4.60808477  | 2.58116856  | 8.22039393 |
| 9.58762847  | 2.57239712  | 8.22589166 |
| 4.19763202  | 9.26068305  | 7.42791354 |
| 6.82569536  | 7.25602510  | 8.38426905 |
| 1.79854787  | 7.53038604  | 8.41467239 |
| -0.36279580 | 9.30869641  | 8.08745435 |
| 2.19560276  | 4.22011079  | 7.20196732 |

|             |             |            |
|-------------|-------------|------------|
| 7.18435217  | 4.24733230  | 7.18945755 |
| 3.39048616  | 11.89476434 | 7.19596583 |
| 8.40647648  | 11.82619628 | 7.18549619 |
| -0.32908751 | 6.81501304  | 6.33734250 |
| 4.68058686  | 6.71705188  | 6.30048151 |
| 1.72965237  | 1.57723731  | 6.16693889 |
| 6.71662375  | 1.59809808  | 6.17803397 |
| 2.19186726  | 8.27896020  | 5.59422327 |
| 7.20878545  | 8.34761018  | 5.71858095 |
| 9.19232754  | 3.12745986  | 5.29888206 |
| 4.20664246  | 3.13070056  | 5.29945243 |
| 4.67472790  | 10.80379103 | 4.26744228 |
| -0.30396466 | 10.80672608 | 4.27975235 |
| 6.73235614  | 5.71255073  | 4.01987585 |
| 1.73638733  | 5.68639126  | 4.01780824 |
| 7.18280990  | 12.34728839 | 3.64025548 |
| 2.19323130  | 12.34476645 | 3.64484093 |
| 9.23311790  | 7.21504743  | 3.37725392 |
| 4.24399547  | 7.20136159  | 3.34750748 |
| 5.47292232  | 2.23055553  | 2.34193015 |
| 0.48302215  | 2.23055553  | 2.34193015 |
| 6.73540354  | 9.72874641  | 2.00704742 |
| 1.74550355  | 9.72874641  | 2.00704742 |
| 7.98876715  | 3.77819967  | 1.47019899 |
| 2.99886727  | 3.77819967  | 1.47019899 |
| 9.21347809  | 11.29064846 | 1.28800344 |
| 4.22357798  | 11.29064846 | 1.28800344 |
| 5.52626467  | 6.13002825  | 0.45987183 |
| 0.53636485  | 6.13002825  | 0.45987183 |
| 7.45328903  | 1.12937152  | 0.40848067 |
| 2.46338916  | 1.12937152  | 0.40848067 |
| 4.75647831  | 8.73880577  | 0.18583304 |
| -0.23342146 | 8.73880577  | 0.18583304 |
| 1.68811220  | 7.25891007  | 9.57517439 |
| 4.73576370  | 2.41188340  | 9.39663273 |
| 9.71400369  | 2.40205863  | 9.40205677 |
| 6.47896115  | 7.00585084  | 9.50356827 |
| 2.53471762  | 10.19653366 | 7.12767627 |
| -0.06228555 | 10.78216505 | 6.89169134 |
| 3.20568148  | 7.74638114  | 7.12730594 |
| 8.26182329  | 7.86336774  | 7.27819513 |
| 0.68453099  | 12.41431478 | 4.90419136 |
| 7.51761072  | 0.04389901  | 7.03511791 |
| 3.86933178  | 5.13378091  | 6.99722330 |

|             |             |            |
|-------------|-------------|------------|
| 8.88592739  | 5.15212446  | 6.98644133 |
| 3.20284778  | 2.68722778  | 6.91686411 |
| 8.19314650  | 2.70829872  | 6.91878513 |
| 0.75560387  | 8.28116061  | 6.96657639 |
| 5.69527797  | 8.29285663  | 6.97857831 |
| 4.98265015  | 10.88645483 | 6.88594351 |
| 7.40716172  | 10.19739380 | 6.93481652 |
| 1.37679411  | 5.85178544  | 6.78119572 |
| 6.42150332  | 5.90906749  | 6.80496632 |
| 0.69108227  | 3.22858608  | 6.74158393 |
| 5.68776424  | 3.24592683  | 6.73668455 |
| -0.00276298 | 0.80952990  | 6.71616913 |
| 4.99279366  | 0.83557234  | 6.72483464 |
| 3.24426113  | 11.74778342 | 5.18695640 |
| 8.24711243  | 11.74990088 | 5.17167099 |
| 8.89215969  | 9.17432356  | 4.97186384 |
| 3.89826403  | 9.21190299  | 5.07052726 |
| 7.50727711  | 4.23131183  | 5.04006279 |
| 2.51502265  | 4.21030261  | 5.04127771 |
| 8.19216716  | 6.77145764  | 4.98915967 |
| 3.21624003  | 6.74202928  | 4.91720493 |
| 5.67406363  | 12.41246793 | 4.90154025 |
| 2.46402436  | 0.00382844  | 7.04339313 |
| 3.23127999  | 1.45949164  | 4.83871372 |
| 8.21548999  | 1.46509644  | 4.84141239 |
| 1.39547704  | 9.88023807  | 4.83022038 |
| 6.39224180  | 9.85286401  | 4.74314684 |
| 5.02660250  | 4.85975882  | 4.75690565 |
| 0.02504524  | 4.84003057  | 4.73449414 |
| 0.73162502  | 7.26705172  | 4.71077564 |
| 5.74063403  | 7.31861533  | 4.71687448 |
| 5.74409687  | 2.17770772  | 4.51794890 |
| 0.75407990  | 2.17622713  | 4.51477873 |
| 8.92724419  | 3.16928101  | 3.13275409 |
| 3.93734455  | 3.16928101  | 3.13275409 |
| 9.65447807  | 0.51179242  | 2.92767382 |
| 4.66457796  | 0.51179242  | 2.92767382 |
| 8.19081593  | 10.75315189 | 2.92137337 |
| 3.20091629  | 10.75315189 | 2.92137337 |
| 7.52427816  | 8.16568470  | 2.89047265 |
| 2.53437829  | 8.16568470  | 2.89047265 |
| 6.46140337  | 3.88992119  | 2.81003308 |
| 1.47150326  | 3.88992119  | 2.81003308 |
| 8.23615360  | 5.59719324  | 2.75910425 |

|             |             |            |
|-------------|-------------|------------|
| 3.24625349  | 5.59719324  | 2.75910425 |
| 5.72548342  | 11.29866314 | 2.69921899 |
| 0.73558354  | 11.29866314 | 2.69921899 |
| 5.02271366  | 8.84247589  | 2.64073300 |
| 0.03281343  | 8.84247589  | 2.64073300 |
| 7.16234589  | 1.15467191  | 2.58495903 |
| 2.17244577  | 1.15467191  | 2.58495903 |
| 5.69094276  | 6.28061676  | 2.47308970 |
| 0.70104283  | 6.28061676  | 2.47308970 |
| 4.72644854  | 4.52631235  | 0.98044425 |
| -0.26345146 | 4.52631235  | 0.98044425 |
| 8.98416233  | 2.08401227  | 0.94984233 |
| 3.99426270  | 2.08401227  | 0.94984233 |
| 7.49692297  | 12.16127491 | 0.88189071 |
| 2.50702286  | 12.16127491 | 0.88189071 |
| 8.92881203  | 7.14167833  | 0.77916235 |
| 3.93891239  | 7.14167833  | 0.77916235 |
| 8.23179626  | 9.65808487  | 0.74752367 |
| 3.24189639  | 9.65808487  | 0.74752367 |
| 6.50168800  | 2.71004343  | 0.73384589 |
| 1.51178777  | 2.71004343  | 0.73384589 |
| 5.78449345  | 0.24636792  | 0.66762453 |
| 0.79459333  | 0.24636792  | 0.66762453 |
| 6.40908241  | 7.83185196  | 0.60482943 |
| 1.41918242  | 7.83185196  | 0.60482943 |
| 7.18588972  | 5.31081581  | 0.60368013 |
| 2.19598985  | 5.31081581  | 0.60368013 |
| 5.68450737  | 10.28863907 | 0.50651002 |
| 0.69460732  | 10.28863907 | 0.50651002 |

# CHCH<sub>2</sub> cv

1.000000000000

|             |             |             |    |
|-------------|-------------|-------------|----|
| 9.97980000  | 0.00000000  | 0.00000000  |    |
| -0.76395804 | 12.66177393 | 0.00000000  |    |
| 0.00000004  | 0.00000004  | 19.64040000 |    |
| H           | C           | O           | Fe |
| 3           | 41          | 4           | 80 |

Cart

|             |             |            |
|-------------|-------------|------------|
| 8.20083476  | 9.09566440  | 9.84661906 |
| 9.26914033  | 7.61125557  | 9.64975978 |
| -0.23880815 | 10.36346905 | 8.51776236 |
| 8.90396336  | 8.54574969  | 9.21365382 |
| 4.61325052  | 2.59854906  | 8.21992226 |



|             |             |            |
|-------------|-------------|------------|
| 9.59345949  | 2.57646609  | 8.22400762 |
| 4.21638888  | 9.25900363  | 7.45027245 |
| 6.77868366  | 7.33996026  | 8.36953740 |
| 1.83283762  | 7.47392116  | 8.41807208 |
| -0.29705329 | 9.21906131  | 8.24329684 |
| 2.19896429  | 4.22380152  | 7.19530567 |
| 7.19483560  | 4.25358788  | 7.19149357 |
| 3.38576842  | 11.88839188 | 7.19495176 |
| 8.39383335  | 11.82748642 | 7.16808969 |
| -0.32752040 | 6.84090120  | 6.35181909 |
| 4.69126096  | 6.72725008  | 6.30121635 |
| 1.72920086  | 1.57932993  | 6.16471884 |
| 6.71662591  | 1.60735434  | 6.17621477 |
| 2.20103107  | 8.28571828  | 5.61961566 |
| 7.20330540  | 8.37053861  | 5.70774081 |
| 9.19516539  | 3.13521816  | 5.29526936 |
| 4.20787814  | 3.13502037  | 5.29736950 |
| 4.67609042  | 10.81368294 | 4.26884456 |
| -0.30113615 | 10.80959095 | 4.27819015 |
| 6.73608033  | 5.72224671  | 4.02232011 |
| 1.73849393  | 5.69595719  | 4.02064555 |
| 7.18224313  | 12.34896574 | 3.63894778 |
| 2.19300375  | 12.34664637 | 3.64556773 |
| 9.23543343  | 7.21448059  | 3.38281762 |
| 4.24582101  | 7.20325062  | 3.35073872 |
| 5.47292232  | 2.23055553  | 2.34193015 |
| 0.48302215  | 2.23055553  | 2.34193015 |
| 6.73540354  | 9.72874641  | 2.00704742 |
| 1.74550355  | 9.72874641  | 2.00704742 |
| 7.98876715  | 3.77819967  | 1.47019899 |
| 2.99886727  | 3.77819967  | 1.47019899 |
| 9.21347809  | 11.29064846 | 1.28800344 |
| 4.22357798  | 11.29064846 | 1.28800344 |
| 5.52626467  | 6.13002825  | 0.45987183 |
| 0.53636485  | 6.13002825  | 0.45987183 |
| 7.45328903  | 1.12937152  | 0.40848067 |
| 2.46338916  | 1.12937152  | 0.40848067 |
| 4.75647831  | 8.73880577  | 0.18583304 |
| -0.23342146 | 8.73880577  | 0.18583304 |
| 1.72314691  | 7.16635889  | 9.56955039 |
| 4.73390508  | 2.43432962  | 9.39695870 |
| 9.72034312  | 2.41266766  | 9.40129734 |
| 6.46562253  | 7.01807189  | 9.48032570 |
| 2.54932913  | 10.17884329 | 7.11040339 |

|             |             |            |
|-------------|-------------|------------|
| -0.06616413 | 10.74823221 | 6.84556150 |
| 3.22802409  | 7.74375045  | 7.13639136 |
| 8.28457837  | 7.92594273  | 7.28537120 |
| 0.69081301  | 12.40636633 | 4.91309339 |
| 7.51151899  | 0.05924250  | 7.03988193 |
| 3.87667469  | 5.13453948  | 6.98719162 |
| 8.89746447  | 5.15931596  | 6.97472065 |
| 3.20502889  | 2.68943026  | 6.91472858 |
| 8.19784594  | 2.71527006  | 6.91787473 |
| 0.78148215  | 8.28418391  | 6.99869633 |
| 5.70814508  | 8.30006096  | 6.97950741 |
| 4.97572694  | 10.88923543 | 6.88389153 |
| 7.35841843  | 10.23466473 | 6.90109053 |
| 1.38096287  | 5.85411229  | 6.77205065 |
| 6.42867103  | 5.91121246  | 6.79162301 |
| 0.69423205  | 3.23028300  | 6.73678170 |
| 5.69288397  | 3.25309760  | 6.73581437 |
| 0.00145028  | 0.80550732  | 6.72817845 |
| 4.99193717  | 0.83621499  | 6.72802422 |
| 3.24665989  | 11.75147347 | 5.18483621 |
| 8.25202950  | 11.76528770 | 5.16271813 |
| 8.89546616  | 9.18389250  | 4.97325084 |
| 3.89673409  | 9.21070499  | 5.04843121 |
| 7.51109087  | 4.23909055  | 5.03827724 |
| 2.51640771  | 4.21363656  | 5.03829886 |
| 8.19569272  | 6.78501130  | 5.00401852 |
| 3.21686681  | 6.74712733  | 4.91909067 |
| 5.67728540  | 12.41788620 | 4.90384227 |
| 1.70297911  | 12.66163921 | 7.03677774 |
| 3.22899908  | 1.46316552  | 4.83666767 |
| 8.21705004  | 1.47200827  | 4.84172579 |
| 1.40064618  | 9.87247959  | 4.81748160 |
| 6.39336734  | 9.85751091  | 4.71539823 |
| 5.03064727  | 4.86312560  | 4.75408873 |
| 0.02737892  | 4.84678201  | 4.72850062 |
| 0.73289392  | 7.27984644  | 4.72138621 |
| 5.74363638  | 7.32228599  | 4.71593269 |
| 5.74331591  | 2.18005989  | 4.51851434 |
| 0.75287001  | 2.17451088  | 4.51533508 |
| 8.92724419  | 3.16928101  | 3.13275409 |
| 3.93734455  | 3.16928101  | 3.13275409 |
| 9.65447807  | 0.51179242  | 2.92767382 |
| 4.66457796  | 0.51179242  | 2.92767382 |
| 8.19081593  | 10.75315189 | 2.92137337 |

|             |             |            |
|-------------|-------------|------------|
| 3.20091629  | 10.75315189 | 2.92137337 |
| 7.52427816  | 8.16568470  | 2.89047265 |
| 2.53437829  | 8.16568470  | 2.89047265 |
| 6.46140337  | 3.88992119  | 2.81003308 |
| 1.47150326  | 3.88992119  | 2.81003308 |
| 8.23615360  | 5.59719324  | 2.75910425 |
| 3.24625349  | 5.59719324  | 2.75910425 |
| 5.72548342  | 11.29866314 | 2.69921899 |
| 0.73558354  | 11.29866314 | 2.69921899 |
| 5.02271366  | 8.84247589  | 2.64073300 |
| 0.03281343  | 8.84247589  | 2.64073300 |
| 7.16234589  | 1.15467191  | 2.58495903 |
| 2.17244577  | 1.15467191  | 2.58495903 |
| 5.69094276  | 6.28061676  | 2.47308970 |
| 0.70104283  | 6.28061676  | 2.47308970 |
| 4.72644854  | 4.52631235  | 0.98044425 |
| -0.26345146 | 4.52631235  | 0.98044425 |
| 8.98416233  | 2.08401227  | 0.94984233 |
| 3.99426270  | 2.08401227  | 0.94984233 |
| 7.49692297  | 12.16127491 | 0.88189071 |
| 2.50702286  | 12.16127491 | 0.88189071 |
| 8.92881203  | 7.14167833  | 0.77916235 |
| 3.93891239  | 7.14167833  | 0.77916235 |
| 8.23179626  | 9.65808487  | 0.74752367 |
| 3.24189639  | 9.65808487  | 0.74752367 |
| 6.50168800  | 2.71004343  | 0.73384589 |
| 1.51178777  | 2.71004343  | 0.73384589 |
| 5.78449345  | 0.24636792  | 0.66762453 |
| 0.79459333  | 0.24636792  | 0.66762453 |
| 6.40908241  | 7.83185196  | 0.60482943 |
| 1.41918242  | 7.83185196  | 0.60482943 |
| 7.18588972  | 5.31081581  | 0.60368013 |
| 2.19598985  | 5.31081581  | 0.60368013 |
| 5.68450737  | 10.28863907 | 0.50651002 |
| 0.69460732  | 10.28863907 | 0.50651002 |

# H+CHCH<sub>2</sub>cv

1.000000000000

|             |             |             |    |
|-------------|-------------|-------------|----|
| 9.97980000  | 0.00000000  | 0.00000000  |    |
| -0.76395804 | 12.66177393 | 0.00000000  |    |
| 0.00000004  | 0.00000004  | 19.64040000 |    |
| H           | C           | O           | Fe |
| 4           | 41          | 4           | 80 |

Cart

|             |             |            |
|-------------|-------------|------------|
| 8.20031187  | 9.12584508  | 9.82329505 |
| 9.28119165  | 7.65544819  | 9.61981457 |
| -0.16636394 | 10.43106321 | 8.51498622 |
| 6.19669164  | 11.29420430 | 7.98583891 |
| 8.91113562  | 8.58691892  | 9.18586798 |
| 4.60629923  | 2.64813279  | 8.22858719 |
| 9.60104365  | 2.64177011  | 8.22279527 |
| 4.16648319  | 9.25677294  | 7.38246442 |
| 6.76996647  | 7.33568235  | 8.37760722 |
| 2.35000662  | 7.21369153  | 8.64440645 |
| -0.29494353 | 9.27674339  | 8.21639239 |
| 2.18889054  | 4.24036800  | 7.18080774 |
| 7.18925907  | 4.26447972  | 7.18477347 |
| 3.37395762  | 11.90227197 | 7.21307477 |
| 8.42065005  | 11.87312339 | 7.14652160 |
| -0.34728487 | 6.83639761  | 6.35512986 |
| 4.69048927  | 6.72377920  | 6.26967118 |
| 1.73225854  | 1.60281218  | 6.16020198 |
| 6.71717267  | 1.60144075  | 6.19168939 |
| 2.17693891  | 8.27650617  | 5.58197381 |
| 7.19761810  | 8.38578859  | 5.71559804 |
| 9.18927044  | 3.13367779  | 5.28547317 |
| 4.20695558  | 3.13835285  | 5.29692149 |
| 4.66554474  | 10.78979088 | 4.26315418 |
| -0.30501725 | 10.81035487 | 4.27383440 |
| 6.73207952  | 5.72594356  | 4.02243405 |
| 1.73391101  | 5.68983111  | 4.01574772 |
| 7.17734972  | 12.34886948 | 3.64277437 |
| 2.19378147  | 12.34685979 | 3.64599522 |
| 9.22652477  | 7.21291577  | 3.37012097 |
| 4.24180586  | 7.20341789  | 3.33338034 |
| 5.47292232  | 2.23055553  | 2.34193015 |
| 0.48302215  | 2.23055553  | 2.34193015 |
| 6.73540354  | 9.72874641  | 2.00704742 |
| 1.74550355  | 9.72874641  | 2.00704742 |
| 7.98876715  | 3.77819967  | 1.47019899 |
| 2.99886727  | 3.77819967  | 1.47019899 |
| 9.21347809  | 11.29064846 | 1.28800344 |
| 4.22357798  | 11.29064846 | 1.28800344 |
| 5.52626467  | 6.13002825  | 0.45987183 |
| 0.53636485  | 6.13002825  | 0.45987183 |
| 7.45328903  | 1.12937152  | 0.40848067 |
| 2.46338916  | 1.12937152  | 0.40848067 |

|             |             |            |
|-------------|-------------|------------|
| 4.75647831  | 8.73880577  | 0.18583304 |
| -0.23342146 | 8.73880577  | 0.18583304 |
| 1.92412606  | 6.96775908  | 9.71309372 |
| 4.72121017  | 2.49672289  | 9.40785086 |
| 9.70894020  | 2.49460456  | 9.40355723 |
| 6.43256263  | 7.03123622  | 9.48810789 |
| 2.51254035  | 10.20240414 | 7.11502449 |
| -0.07185259 | 10.78184289 | 6.86740449 |
| 3.19515778  | 7.71566059  | 7.15479541 |
| 8.25995143  | 7.91685844  | 7.28587250 |
| 0.69164600  | 12.40413513 | 4.91346149 |
| 7.50347770  | 0.05405202  | 7.07318315 |
| 3.85886905  | 5.17140606  | 7.01931513 |
| 8.89645266  | 5.16014568  | 6.98483446 |
| 3.20594191  | 2.71169625  | 6.91458102 |
| 8.19098482  | 2.72026230  | 6.91333194 |
| 0.70980361  | 8.36716348  | 6.89327165 |
| 5.69993323  | 8.29667628  | 6.97308659 |
| 4.94648909  | 10.89183611 | 6.94279173 |
| 7.35339647  | 10.26385477 | 6.95949216 |
| 1.36941392  | 5.87365222  | 6.75287449 |
| 6.43259094  | 5.92651306  | 6.78942823 |
| 0.68611550  | 3.25620949  | 6.72704837 |
| 5.68939346  | 3.26297932  | 6.73607373 |
| 0.00453693  | 0.84161797  | 6.70421267 |
| 4.98188803  | 0.84918626  | 6.71852805 |
| 3.24772427  | 11.75103941 | 5.18995934 |
| 8.24826865  | 11.76485570 | 5.16298596 |
| 8.88562864  | 9.19589306  | 4.99550603 |
| 3.88759921  | 9.21509922  | 5.12863721 |
| 7.50826368  | 4.24526573  | 5.03800367 |
| 2.51597215  | 4.22364509  | 5.03982491 |
| 8.18837280  | 6.79330903  | 4.99982148 |
| 3.21543499  | 6.75627761  | 4.90731204 |
| 5.66921007  | 12.40787020 | 4.91123932 |
| 2.46814460  | 0.02544261  | 7.03655552 |
| 3.22801713  | 1.46792623  | 4.83795800 |
| 8.21200282  | 1.46391871  | 4.84632375 |
| 1.39640195  | 9.88777089  | 4.79904467 |
| 6.38880037  | 9.87052064  | 4.73815565 |
| 5.02237854  | 4.87401920  | 4.76661942 |
| 0.01568761  | 4.85144322  | 4.71880483 |
| 0.72270847  | 7.27773649  | 4.70258470 |
| 5.74099235  | 7.33666806  | 4.70634950 |

|             |             |            |
|-------------|-------------|------------|
| 5.74423925  | 2.18021065  | 4.52171820 |
| 0.75140339  | 2.17741911  | 4.51182492 |
| 8.92724419  | 3.16928101  | 3.13275409 |
| 3.93734455  | 3.16928101  | 3.13275409 |
| 9.65447807  | 0.51179242  | 2.92767382 |
| 4.66457796  | 0.51179242  | 2.92767382 |
| 8.19081593  | 10.75315189 | 2.92137337 |
| 3.20091629  | 10.75315189 | 2.92137337 |
| 7.52427816  | 8.16568470  | 2.89047265 |
| 2.53437829  | 8.16568470  | 2.89047265 |
| 6.46140337  | 3.88992119  | 2.81003308 |
| 1.47150326  | 3.88992119  | 2.81003308 |
| 8.23615360  | 5.59719324  | 2.75910425 |
| 3.24625349  | 5.59719324  | 2.75910425 |
| 5.72548342  | 11.29866314 | 2.69921899 |
| 0.73558354  | 11.29866314 | 2.69921899 |
| 5.02271366  | 8.84247589  | 2.64073300 |
| 0.03281343  | 8.84247589  | 2.64073300 |
| 7.16234589  | 1.15467191  | 2.58495903 |
| 2.17244577  | 1.15467191  | 2.58495903 |
| 5.69094276  | 6.28061676  | 2.47308970 |
| 0.70104283  | 6.28061676  | 2.47308970 |
| 4.72644854  | 4.52631235  | 0.98044425 |
| -0.26345146 | 4.52631235  | 0.98044425 |
| 8.98416233  | 2.08401227  | 0.94984233 |
| 3.99426270  | 2.08401227  | 0.94984233 |
| 7.49692297  | 12.16127491 | 0.88189071 |
| 2.50702286  | 12.16127491 | 0.88189071 |
| 8.92881203  | 7.14167833  | 0.77916235 |
| 3.93891239  | 7.14167833  | 0.77916235 |
| 8.23179626  | 9.65808487  | 0.74752367 |
| 3.24189639  | 9.65808487  | 0.74752367 |
| 6.50168800  | 2.71004343  | 0.73384589 |
| 1.51178777  | 2.71004343  | 0.73384589 |
| 5.78449345  | 0.24636792  | 0.66762453 |
| 0.79459333  | 0.24636792  | 0.66762453 |
| 6.40908241  | 7.83185196  | 0.60482943 |
| 1.41918242  | 7.83185196  | 0.60482943 |
| 7.18588972  | 5.31081581  | 0.60368013 |
| 2.19598985  | 5.31081581  | 0.60368013 |
| 5.68450737  | 10.28863907 | 0.50651002 |
| 0.69460732  | 10.28863907 | 0.50651002 |

# TS for CHCH<sub>2</sub><sub>cv</sub>->CHCH<sub>2</sub>+Cv

1.000000000000

|             |             |             |    |
|-------------|-------------|-------------|----|
| 9.97980000  | 0.00000000  | 0.00000000  |    |
| -0.76395804 | 12.66177393 | 0.00000000  |    |
| 0.00000004  | 0.00000004  | 19.64040000 |    |
| H           | C           | O           | Fe |
| 4           | 41          | 4           | 80 |

Cart

|             |             |            |
|-------------|-------------|------------|
| 8.25609109  | 9.20662576  | 9.61281385 |
| 9.34014027  | 7.78086322  | 9.46619807 |
| 0.39192461  | 10.40092899 | 8.88358447 |
| 6.21801098  | 11.26336785 | 7.98877592 |
| 8.97273911  | 8.68765953  | 8.95691031 |
| 4.60522591  | 2.64617639  | 8.23112437 |
| 9.60321397  | 2.62727552  | 8.22280613 |
| 4.16484218  | 9.24887743  | 7.39322924 |
| 6.77262152  | 7.31980879  | 8.41726525 |
| 2.40714887  | 7.16806521  | 8.67154780 |
| 0.02078944  | 9.49938772  | 8.31393962 |
| 2.18523997  | 4.24560605  | 7.17489386 |
| 7.19281195  | 4.25407629  | 7.18231226 |
| 3.38839159  | 11.89411516 | 7.21190812 |
| 8.42335180  | 11.85994261 | 7.15775256 |
| -0.34058710 | 6.85519370  | 6.35536205 |
| 4.67475907  | 6.71838738  | 6.26985908 |
| 1.72787643  | 1.61476866  | 6.15589342 |
| 6.72473766  | 1.58900003  | 6.19264866 |
| 2.14730922  | 8.27556422  | 5.62015013 |
| 7.20490439  | 8.36757137  | 5.72159660 |
| 9.18926524  | 3.12956429  | 5.28861054 |
| 4.20895372  | 3.13580169  | 5.29770938 |
| 4.66563384  | 10.77612951 | 4.26191275 |
| -0.30779164 | 10.80792585 | 4.27436291 |
| 6.73002066  | 5.71464843  | 4.01979009 |
| 1.73298741  | 5.69225121  | 4.01992923 |
| 7.17637318  | 12.34704722 | 3.64299751 |
| 2.19748314  | 12.34337729 | 3.64080912 |
| 9.22824254  | 7.21228435  | 3.36489019 |
| 4.24029123  | 7.20313060  | 3.33693515 |
| 5.47292232  | 2.23055553  | 2.34193015 |
| 0.48302215  | 2.23055553  | 2.34193015 |
| 6.73540354  | 9.72874641  | 2.00704742 |
| 1.74550355  | 9.72874641  | 2.00704742 |
| 7.98876715  | 3.77819967  | 1.47019899 |

|             |             |            |
|-------------|-------------|------------|
| 2.99886727  | 3.77819967  | 1.47019899 |
| 9.21347809  | 11.29064846 | 1.28800344 |
| 4.22357798  | 11.29064846 | 1.28800344 |
| 5.52626467  | 6.13002825  | 0.45987183 |
| 0.53636485  | 6.13002825  | 0.45987183 |
| 7.45328903  | 1.12937152  | 0.40848067 |
| 2.46338916  | 1.12937152  | 0.40848067 |
| 4.75647831  | 8.73880577  | 0.18583304 |
| -0.23342146 | 8.73880577  | 0.18583304 |
| 1.97729337  | 6.90455755  | 9.73389765 |
| 4.72336547  | 2.49488018  | 9.41018954 |
| 9.72122660  | 2.47977222  | 9.40278901 |
| 6.43262580  | 7.06935315  | 9.53612928 |
| 2.51061022  | 10.19553810 | 7.13523946 |
| -0.01946588 | 10.84811751 | 6.85541359 |
| 3.19315977  | 7.70704423  | 7.16556929 |
| 8.18023562  | 7.78533508  | 7.24910976 |
| 0.68682942  | 12.41920029 | 4.89401840 |
| 7.50641275  | 0.03079784  | 7.07034184 |
| 3.86143802  | 5.16386992  | 7.02693538 |
| 8.88731196  | 5.16763531  | 6.97150586 |
| 3.20808735  | 2.71380277  | 6.91616222 |
| 8.19430667  | 2.71198272  | 6.91562764 |
| 0.67748245  | 8.42629776  | 6.89433544 |
| 5.68741901  | 8.28251767  | 6.97330759 |
| 4.95959741  | 10.87871215 | 6.95233360 |
| 7.41675847  | 10.21044081 | 7.01641373 |
| 1.36317533  | 5.88088535  | 6.74568807 |
| 6.40840762  | 5.90195649  | 6.79346409 |
| 0.68589809  | 3.25506488  | 6.72716437 |
| 5.68930255  | 3.25563718  | 6.73627921 |
| 0.00779747  | 0.83599388  | 6.70471623 |
| 4.99008512  | 0.84370961  | 6.71673197 |
| 3.24553085  | 11.74026394 | 5.19144639 |
| 8.23729393  | 11.75144150 | 5.16997960 |
| 8.89376401  | 9.19328383  | 5.02662622 |
| 3.88010104  | 9.20998471  | 5.14659024 |
| 7.50620038  | 4.23524494  | 5.03763614 |
| 2.51683771  | 4.22256516  | 5.04059042 |
| 8.19247695  | 6.77147643  | 4.96549463 |
| 3.20661242  | 6.76054350  | 4.91096848 |
| 5.66579354  | 12.40178493 | 4.91025753 |
| 2.50207697  | 0.05456832  | 7.01231133 |
| 3.23361961  | 1.46604393  | 4.83907521 |



|             |             |            |
|-------------|-------------|------------|
| 8.21503838  | 1.45613457  | 4.84870070 |
| 1.39762060  | 9.88185819  | 4.78507386 |
| 6.38637931  | 9.86914024  | 4.76953693 |
| 5.01602634  | 4.87064248  | 4.76126905 |
| 0.01911313  | 4.84166625  | 4.71339316 |
| 0.71983134  | 7.27277845  | 4.70729533 |
| 5.73761043  | 7.33055587  | 4.70681193 |
| 5.74728752  | 2.17729255  | 4.52092745 |
| 0.75198702  | 2.18042274  | 4.50902195 |
| 8.92724419  | 3.16928101  | 3.13275409 |
| 3.93734455  | 3.16928101  | 3.13275409 |
| 9.65447807  | 0.51179242  | 2.92767382 |
| 4.66457796  | 0.51179242  | 2.92767382 |
| 8.19081593  | 10.75315189 | 2.92137337 |
| 3.20091629  | 10.75315189 | 2.92137337 |
| 7.52427816  | 8.16568470  | 2.89047265 |
| 2.53437829  | 8.16568470  | 2.89047265 |
| 6.46140337  | 3.88992119  | 2.81003308 |
| 1.47150326  | 3.88992119  | 2.81003308 |
| 8.23615360  | 5.59719324  | 2.75910425 |
| 3.24625349  | 5.59719324  | 2.75910425 |
| 5.72548342  | 11.29866314 | 2.69921899 |
| 0.73558354  | 11.29866314 | 2.69921899 |
| 5.02271366  | 8.84247589  | 2.64073300 |
| 0.03281343  | 8.84247589  | 2.64073300 |
| 7.16234589  | 1.15467191  | 2.58495903 |
| 2.17244577  | 1.15467191  | 2.58495903 |
| 5.69094276  | 6.28061676  | 2.47308970 |
| 0.70104283  | 6.28061676  | 2.47308970 |
| 4.72644854  | 4.52631235  | 0.98044425 |
| -0.26345146 | 4.52631235  | 0.98044425 |
| 8.98416233  | 2.08401227  | 0.94984233 |
| 3.99426270  | 2.08401227  | 0.94984233 |
| 7.49692297  | 12.16127491 | 0.88189071 |
| 2.50702286  | 12.16127491 | 0.88189071 |
| 8.92881203  | 7.14167833  | 0.77916235 |
| 3.93891239  | 7.14167833  | 0.77916235 |
| 8.23179626  | 9.65808487  | 0.74752367 |
| 3.24189639  | 9.65808487  | 0.74752367 |
| 6.50168800  | 2.71004343  | 0.73384589 |
| 1.51178777  | 2.71004343  | 0.73384589 |
| 5.78449345  | 0.24636792  | 0.66762453 |
| 0.79459333  | 0.24636792  | 0.66762453 |
| 6.40908241  | 7.83185196  | 0.60482943 |

|            |             |            |
|------------|-------------|------------|
| 1.41918242 | 7.83185196  | 0.60482943 |
| 7.18588972 | 5.31081581  | 0.60368013 |
| 2.19598985 | 5.31081581  | 0.60368013 |
| 5.68450737 | 10.28863907 | 0.50651002 |
| 0.69460732 | 10.28863907 | 0.50651002 |

# CHCH<sub>2</sub>+Cv (state1)

1.000000000000

|             |             |             |    |
|-------------|-------------|-------------|----|
| 9.97980000  | 0.00000000  | 0.00000000  |    |
| -0.76395804 | 12.66177393 | 0.00000000  |    |
| 0.00000004  | 0.00000004  | 19.64040000 |    |
| H           | C           | O           | Fe |
| 4           | 41          | 4           | 80 |

Cart

|             |             |            |
|-------------|-------------|------------|
| 8.64624070  | 8.95294722  | 8.75207630 |
| 0.09543800  | 8.11125817  | 9.53934495 |
| 1.39481880  | 10.17522053 | 9.02643673 |
| 6.20882251  | 11.26320873 | 7.95924922 |
| -0.21598293 | 8.74967315  | 8.70523571 |
| 4.61066156  | 2.62261323  | 8.22929208 |
| 9.60346815  | 2.58591487  | 8.21676759 |
| 4.16589811  | 9.24729146  | 7.37382113 |
| 6.75579491  | 7.47655477  | 8.41668349 |
| 2.67703131  | 6.98463083  | 8.70769139 |
| 0.60395824  | 9.86773620  | 8.29551539 |
| 2.19058616  | 4.24153896  | 7.16588426 |
| 7.19750473  | 4.24903846  | 7.20188787 |
| 3.37069012  | 11.89402502 | 7.22104269 |
| 8.45708106  | 11.82429693 | 7.16069846 |
| -0.33790446 | 6.81805101  | 6.36386872 |
| 4.69936803  | 6.70802165  | 6.26382384 |
| 1.73055377  | 1.60903727  | 6.14695493 |
| 6.72235422  | 1.58373897  | 6.19331566 |
| 2.14638346  | 8.24197823  | 5.65328246 |
| 7.19113045  | 8.37898871  | 5.68884199 |
| 9.18853758  | 3.13178007  | 5.28980693 |
| 4.21393816  | 3.13852360  | 5.30251450 |
| 4.65477929  | 10.77296128 | 4.26624391 |
| -0.29818945 | 10.83373577 | 4.30018614 |
| 6.73184171  | 5.71754504  | 4.02089074 |
| 1.73294008  | 5.68979628  | 4.01666869 |
| 7.16604798  | 12.35042365 | 3.63287588 |
| 2.20464010  | 12.34569300 | 3.63683866 |

|             |             |            |
|-------------|-------------|------------|
| 9.22709964  | 7.20979222  | 3.36885659 |
| 4.23764200  | 7.20317142  | 3.33464271 |
| 5.47292232  | 2.23055553  | 2.34193015 |
| 0.48302215  | 2.23055553  | 2.34193015 |
| 6.73540354  | 9.72874641  | 2.00704742 |
| 1.74550355  | 9.72874641  | 2.00704742 |
| 7.98876715  | 3.77819967  | 1.47019899 |
| 2.99886727  | 3.77819967  | 1.47019899 |
| 9.21347809  | 11.29064846 | 1.28800344 |
| 4.22357798  | 11.29064846 | 1.28800344 |
| 5.52626467  | 6.13002825  | 0.45987183 |
| 0.53636485  | 6.13002825  | 0.45987183 |
| 7.45328903  | 1.12937152  | 0.40848067 |
| 2.46338916  | 1.12937152  | 0.40848067 |
| 4.75647831  | 8.73880577  | 0.18583304 |
| -0.23342146 | 8.73880577  | 0.18583304 |
| 2.34264826  | 6.64856028  | 9.78225015 |
| 4.72906655  | 2.47048881  | 9.40964127 |
| 9.73987758  | 2.42444820  | 9.39255836 |
| 6.58440338  | 7.25744962  | 9.58149975 |
| 2.48173888  | 10.19583129 | 7.18718470 |
| 0.01341839  | 10.87652090 | 6.75789929 |
| 3.23798496  | 7.68142536  | 7.16838051 |
| 8.22603703  | 7.87657704  | 7.21713233 |
| 0.69708891  | 12.44645578 | 4.86796584 |
| 7.52783520  | 0.03591559  | 7.07293843 |
| 3.87124271  | 5.15895880  | 7.03172717 |
| 8.89098326  | 5.15793850  | 6.97753673 |
| 3.20952525  | 2.70545967  | 6.91776725 |
| 8.19474928  | 2.70423836  | 6.91753641 |
| 0.63910765  | 8.44645013  | 6.87662846 |
| 5.71625717  | 8.29803500  | 6.97849753 |
| 4.93049323  | 10.88238733 | 6.94760715 |
| 7.36075446  | 10.25663518 | 6.91406768 |
| 1.37760554  | 5.88841346  | 6.75801554 |
| 6.43213478  | 5.91036913  | 6.80502197 |
| 0.68880425  | 3.24973598  | 6.72809526 |
| 5.69755437  | 3.25212338  | 6.74295908 |
| 0.00663818  | 0.83173774  | 6.70737333 |
| 4.99329818  | 0.83675588  | 6.73678620 |
| 3.23075873  | 11.72409168 | 5.20255576 |
| 8.23350963  | 11.77868487 | 5.15099334 |
| 8.89274261  | 9.21078091  | 5.02034819 |
| 3.87125605  | 9.19865109  | 5.16452757 |

|             |             |            |
|-------------|-------------|------------|
| 7.50900197  | 4.24067168  | 5.04150651 |
| 2.52062540  | 4.22015790  | 5.03976673 |
| 8.18367794  | 6.78361744  | 4.98116449 |
| 3.20468579  | 6.75485733  | 4.90941575 |
| 5.66142653  | 12.39727271 | 4.91524782 |
| 2.48156339  | 0.04640251  | 7.00759884 |
| 3.24919557  | 1.46753975  | 4.83992684 |
| 8.21067129  | 1.46264837  | 4.84650954 |
| 1.41325836  | 9.86040383  | 4.78049173 |
| 6.37839080  | 9.86657928  | 4.71185876 |
| 5.02247155  | 4.87043611  | 4.77567680 |
| 0.01902043  | 4.84885811  | 4.72525141 |
| 0.71583681  | 7.27608226  | 4.71953142 |
| 5.73438596  | 7.32868098  | 4.70463254 |
| 5.74884726  | 2.17711298  | 4.52520936 |
| 0.75249523  | 2.18871064  | 4.50652777 |
| 8.92724419  | 3.16928101  | 3.13275409 |
| 3.93734455  | 3.16928101  | 3.13275409 |
| 9.65447807  | 0.51179242  | 2.92767382 |
| 4.66457796  | 0.51179242  | 2.92767382 |
| 8.19081593  | 10.75315189 | 2.92137337 |
| 3.20091629  | 10.75315189 | 2.92137337 |
| 7.52427816  | 8.16568470  | 2.89047265 |
| 2.53437829  | 8.16568470  | 2.89047265 |
| 6.46140337  | 3.88992119  | 2.81003308 |
| 1.47150326  | 3.88992119  | 2.81003308 |
| 8.23615360  | 5.59719324  | 2.75910425 |
| 3.24625349  | 5.59719324  | 2.75910425 |
| 5.72548342  | 11.29866314 | 2.69921899 |
| 0.73558354  | 11.29866314 | 2.69921899 |
| 5.02271366  | 8.84247589  | 2.64073300 |
| 0.03281343  | 8.84247589  | 2.64073300 |
| 7.16234589  | 1.15467191  | 2.58495903 |
| 2.17244577  | 1.15467191  | 2.58495903 |
| 5.69094276  | 6.28061676  | 2.47308970 |
| 0.70104283  | 6.28061676  | 2.47308970 |
| 4.72644854  | 4.52631235  | 0.98044425 |
| -0.26345146 | 4.52631235  | 0.98044425 |
| 8.98416233  | 2.08401227  | 0.94984233 |
| 3.99426270  | 2.08401227  | 0.94984233 |
| 7.49692297  | 12.16127491 | 0.88189071 |
| 2.50702286  | 12.16127491 | 0.88189071 |
| 8.92881203  | 7.14167833  | 0.77916235 |
| 3.93891239  | 7.14167833  | 0.77916235 |

|            |             |            |
|------------|-------------|------------|
| 8.23179626 | 9.65808487  | 0.74752367 |
| 3.24189639 | 9.65808487  | 0.74752367 |
| 6.50168800 | 2.71004343  | 0.73384589 |
| 1.51178777 | 2.71004343  | 0.73384589 |
| 5.78449345 | 0.24636792  | 0.66762453 |
| 0.79459333 | 0.24636792  | 0.66762453 |
| 6.40908241 | 7.83185196  | 0.60482943 |
| 1.41918242 | 7.83185196  | 0.60482943 |
| 7.18588972 | 5.31081581  | 0.60368013 |
| 2.19598985 | 5.31081581  | 0.60368013 |
| 5.68450737 | 10.28863907 | 0.50651002 |
| 0.69460732 | 10.28863907 | 0.50651002 |

# CHCH<sub>2</sub>+Cv (state2)

1.000000000000

|             |             |             |    |
|-------------|-------------|-------------|----|
| 9.97980000  | 0.00000000  | 0.00000000  |    |
| -0.76395804 | 12.66177393 | 0.00000000  |    |
| 0.00000004  | 0.00000004  | 19.64040000 |    |
| H           | C           | O           | Fe |
| 4           | 41          | 4           | 80 |

Cart

|             |             |            |
|-------------|-------------|------------|
| 8.63733705  | 8.94207696  | 8.77334629 |
| 0.06451334  | 8.05031703  | 9.55083359 |
| 1.40088611  | 10.11386153 | 9.09007451 |
| 0.38106121  | 12.33476959 | 7.85369447 |
| -0.23293440 | 8.71677525  | 8.73284632 |
| 4.61589749  | 2.62755306  | 8.22697024 |
| 9.59746166  | 2.55671049  | 8.22454299 |
| 4.17823764  | 9.25929974  | 7.36882713 |
| 6.72873293  | 7.49091117  | 8.42165275 |
| 2.67241970  | 6.99181879  | 8.70239882 |
| 0.60631846  | 9.82779030  | 8.36075867 |
| 2.18676951  | 4.24611352  | 7.16777773 |
| 7.20442021  | 4.25191504  | 7.20775636 |
| 3.40311199  | 11.91133960 | 7.19921466 |
| 8.34647375  | 11.77653760 | 7.18565524 |
| -0.33761524 | 6.82945763  | 6.36601924 |
| 4.69404334  | 6.71570855  | 6.26107458 |
| 1.73063383  | 1.62630916  | 6.13553610 |
| 6.72521140  | 1.61344247  | 6.17035575 |
| 2.13761702  | 8.25218779  | 5.64998490 |
| 7.18497711  | 8.36486036  | 5.68009240 |
| 9.18982853  | 3.13811777  | 5.29224872 |

|             |             |            |
|-------------|-------------|------------|
| 4.21473100  | 3.13885787  | 5.29499830 |
| 4.65839371  | 10.77676972 | 4.27204846 |
| -0.30343298 | 10.83387472 | 4.27563776 |
| 6.73120275  | 5.71654454  | 4.02114342 |
| 1.73106207  | 5.69250946  | 4.01661842 |
| 7.17494430  | 12.34997782 | 3.63436762 |
| 2.19868019  | 12.34534769 | 3.63970302 |
| 9.22835444  | 7.21015909  | 3.36826840 |
| 4.23783994  | 7.20275508  | 3.33510283 |
| 5.47292232  | 2.23055553  | 2.34193015 |
| 0.48302215  | 2.23055553  | 2.34193015 |
| 6.73540354  | 9.72874641  | 2.00704742 |
| 1.74550355  | 9.72874641  | 2.00704742 |
| 7.98876715  | 3.77819967  | 1.47019899 |
| 2.99886727  | 3.77819967  | 1.47019899 |
| 9.21347809  | 11.29064846 | 1.28800344 |
| 4.22357798  | 11.29064846 | 1.28800344 |
| 5.52626467  | 6.13002825  | 0.45987183 |
| 0.53636485  | 6.13002825  | 0.45987183 |
| 7.45328903  | 1.12937152  | 0.40848067 |
| 2.46338916  | 1.12937152  | 0.40848067 |
| 4.75647831  | 8.73880577  | 0.18583304 |
| -0.23342146 | 8.73880577  | 0.18583304 |
| 2.33897781  | 6.65816704  | 9.77738562 |
| 4.73353140  | 2.47358035  | 9.40585430 |
| 9.73860436  | 2.43543592  | 9.40551996 |
| 6.57338689  | 7.25502318  | 9.58490447 |
| 2.49980996  | 10.21912462 | 7.19998316 |
| 0.01984369  | 10.95640533 | 6.90813696 |
| 3.23152213  | 7.69579202  | 7.16448087 |
| 8.22127088  | 7.86606694  | 7.22373836 |
| 0.68647356  | 12.44305520 | 4.88175419 |
| 7.50394411  | 0.05249247  | 7.02890722 |
| 3.86559765  | 5.17244920  | 7.03551453 |
| 8.89317315  | 5.16183691  | 6.97324380 |
| 3.21656771  | 2.71844053  | 6.91446832 |
| 8.20725021  | 2.70913638  | 6.91940786 |
| 0.63083836  | 8.47291832  | 6.88590672 |
| 5.71468646  | 8.30595287  | 6.97828027 |
| 4.96463687  | 10.89345706 | 6.88517335 |
| 7.37094896  | 10.19795773 | 6.85503401 |
| 1.37414350  | 5.89609940  | 6.76262785 |
| 6.42746512  | 5.90735797  | 6.80223570 |
| 0.69520260  | 3.23802934  | 6.72841765 |

|            |             |            |
|------------|-------------|------------|
| 5.70027239 | 3.26334737  | 6.74078033 |
| 0.03332058 | 0.79028045  | 6.80171977 |
| 5.00660576 | 0.85129786  | 6.72018173 |
| 3.23690331 | 11.73973589 | 5.18934898 |
| 8.24338117 | 11.77425615 | 5.16600680 |
| 8.90788159 | 9.22199329  | 5.03760071 |
| 3.86032994 | 9.20036882  | 5.15802556 |
| 7.50959401 | 4.24216686  | 5.04253469 |
| 2.51939526 | 4.22347332  | 5.04081767 |
| 8.18610980 | 6.78640144  | 4.97887209 |
| 3.20027238 | 6.75680268  | 4.90951561 |
| 5.66375539 | 12.40771019 | 4.89333538 |
| 2.52909562 | 0.09912101  | 7.01231481 |
| 3.24688702 | 1.46849698  | 4.83808368 |
| 8.21916988 | 1.46836471  | 4.84436138 |
| 1.39876306 | 9.89624806  | 4.83162048 |
| 6.37507159 | 9.85330964  | 4.68307201 |
| 5.01969579 | 4.87210503  | 4.77493160 |
| 0.02080280 | 4.85022219  | 4.72534234 |
| 0.71574135 | 7.27674393  | 4.72621689 |
| 5.73225431 | 7.32310236  | 4.70616963 |
| 5.74988840 | 2.18368163  | 4.51861415 |
| 0.74536116 | 2.18217980  | 4.50902845 |
| 8.92724419 | 3.16928101  | 3.13275409 |
| 3.93734455 | 3.16928101  | 3.13275409 |
| 9.65447807 | 0.51179242  | 2.92767382 |
| 4.66457796 | 0.51179242  | 2.92767382 |
| 8.19081593 | 10.75315189 | 2.92137337 |
| 3.20091629 | 10.75315189 | 2.92137337 |
| 7.52427816 | 8.16568470  | 2.89047265 |
| 2.53437829 | 8.16568470  | 2.89047265 |
| 6.46140337 | 3.88992119  | 2.81003308 |
| 1.47150326 | 3.88992119  | 2.81003308 |
| 8.23615360 | 5.59719324  | 2.75910425 |
| 3.24625349 | 5.59719324  | 2.75910425 |
| 5.72548342 | 11.29866314 | 2.69921899 |
| 0.73558354 | 11.29866314 | 2.69921899 |
| 5.02271366 | 8.84247589  | 2.64073300 |
| 0.03281343 | 8.84247589  | 2.64073300 |
| 7.16234589 | 1.15467191  | 2.58495903 |
| 2.17244577 | 1.15467191  | 2.58495903 |
| 5.69094276 | 6.28061676  | 2.47308970 |
| 0.70104283 | 6.28061676  | 2.47308970 |
| 4.72644854 | 4.52631235  | 0.98044425 |

|             |             |            |
|-------------|-------------|------------|
| -0.26345146 | 4.52631235  | 0.98044425 |
| 8.98416233  | 2.08401227  | 0.94984233 |
| 3.99426270  | 2.08401227  | 0.94984233 |
| 7.49692297  | 12.16127491 | 0.88189071 |
| 2.50702286  | 12.16127491 | 0.88189071 |
| 8.92881203  | 7.14167833  | 0.77916235 |
| 3.93891239  | 7.14167833  | 0.77916235 |
| 8.23179626  | 9.65808487  | 0.74752367 |
| 3.24189639  | 9.65808487  | 0.74752367 |
| 6.50168800  | 2.71004343  | 0.73384589 |
| 1.51178777  | 2.71004343  | 0.73384589 |
| 5.78449345  | 0.24636792  | 0.66762453 |
| 0.79459333  | 0.24636792  | 0.66762453 |
| 6.40908241  | 7.83185196  | 0.60482943 |
| 1.41918242  | 7.83185196  | 0.60482943 |
| 7.18588972  | 5.31081581  | 0.60368013 |
| 2.19598985  | 5.31081581  | 0.60368013 |
| 5.68450737  | 10.28863907 | 0.50651002 |
| 0.69460732  | 10.28863907 | 0.50651002 |

# TS for H+CHCH<sub>2</sub>->CH<sub>2</sub>CH<sub>2</sub>

1.000000000000

|             |             |             |    |
|-------------|-------------|-------------|----|
| 9.97980000  | 0.00000000  | 0.00000000  |    |
| -0.76395804 | 12.66177393 | 0.00000000  |    |
| 0.00000004  | 0.00000004  | 19.64040000 |    |
| H           | C           | O           | Fe |
| 4           | 41          | 4           | 80 |

Cart

|             |             |            |
|-------------|-------------|------------|
| 8.67947524  | 9.03416884  | 8.82407547 |
| 0.08220173  | 8.06964285  | 9.54434237 |
| 1.53183630  | 9.97618217  | 9.05036920 |
| 0.37903453  | 11.36038714 | 8.31882383 |
| -0.22161051 | 8.74819507  | 8.73784539 |
| 4.60521008  | 2.61295924  | 8.22762168 |
| 9.59384737  | 2.55445845  | 8.21503904 |
| 4.19755795  | 9.25348219  | 7.36927743 |
| 6.71990752  | 7.49777029  | 8.41979525 |
| 2.68761460  | 6.99105797  | 8.70576569 |
| 0.68226585  | 9.81381831  | 8.34661203 |
| 2.18565947  | 4.24040517  | 7.17009945 |
| 7.19674516  | 4.25223129  | 7.20822528 |
| 3.39283680  | 11.89856696 | 7.19456253 |
| 8.39139146  | 11.80237277 | 7.17818919 |



|             |             |            |
|-------------|-------------|------------|
| -0.33291902 | 6.82275977  | 6.36490756 |
| 4.69665964  | 6.70937917  | 6.25999654 |
| 1.72753308  | 1.60705152  | 6.15549706 |
| 6.71725608  | 1.60942687  | 6.17738336 |
| 2.14861955  | 8.25605733  | 5.65725529 |
| 7.18874799  | 8.36402393  | 5.67834323 |
| 9.18948137  | 3.13603392  | 5.29518413 |
| 4.21210518  | 3.13905918  | 5.30076440 |
| 4.66168017  | 10.78686543 | 4.27351931 |
| -0.29750433 | 10.82128333 | 4.28173862 |
| 6.73127679  | 5.71364130  | 4.01950417 |
| 1.73305419  | 5.69254591  | 4.01813373 |
| 7.17869449  | 12.34804604 | 3.63795624 |
| 2.19793283  | 12.34763911 | 3.64036094 |
| 9.22983604  | 7.20990025  | 3.36978093 |
| 4.23849373  | 7.20338907  | 3.33615685 |
| 5.47292232  | 2.23055553  | 2.34193015 |
| 0.48302215  | 2.23055553  | 2.34193015 |
| 6.73540354  | 9.72874641  | 2.00704742 |
| 1.74550355  | 9.72874641  | 2.00704742 |
| 7.98876715  | 3.77819967  | 1.47019899 |
| 2.99886727  | 3.77819967  | 1.47019899 |
| 9.21347809  | 11.29064846 | 1.28800344 |
| 4.22357798  | 11.29064846 | 1.28800344 |
| 5.52626467  | 6.13002825  | 0.45987183 |
| 0.53636485  | 6.13002825  | 0.45987183 |
| 7.45328903  | 1.12937152  | 0.40848067 |
| 2.46338916  | 1.12937152  | 0.40848067 |
| 4.75647831  | 8.73880577  | 0.18583304 |
| -0.23342146 | 8.73880577  | 0.18583304 |
| 2.35783935  | 6.65823671  | 9.78286223 |
| 4.72779053  | 2.45242003  | 9.40668605 |
| 9.74158765  | 2.37057703  | 9.38854155 |
| 6.58727837  | 7.25081401  | 9.58448608 |
| 2.52612354  | 10.18813622 | 7.13574518 |
| 0.03160682  | 10.97039233 | 6.88399007 |
| 3.24588984  | 7.68683147  | 7.16462281 |
| 8.22015731  | 7.85372818  | 7.21628822 |
| 0.68705866  | 12.43801187 | 4.88605622 |
| 7.51455263  | 0.05403159  | 7.03820770 |
| 3.86597799  | 5.16387171  | 7.03473780 |
| 8.88824611  | 5.16335829  | 6.97078023 |
| 3.20675012  | 2.70863161  | 6.91788730 |
| 8.19593552  | 2.71330696  | 6.91968264 |

|             |             |            |
|-------------|-------------|------------|
| 0.63442516  | 8.45433757  | 6.88532506 |
| 5.72423234  | 8.30356682  | 6.97556285 |
| 4.97110867  | 10.89755332 | 6.88249533 |
| 7.37734451  | 10.21292824 | 6.86245072 |
| 1.38008625  | 5.88905985  | 6.75490418 |
| 6.42499257  | 5.90393376  | 6.79955132 |
| 0.68689048  | 3.24278656  | 6.73123052 |
| 5.69227153  | 3.25891463  | 6.74360941 |
| -0.00529842 | 0.82611680  | 6.71025201 |
| 4.99670191  | 0.84424762  | 6.73037980 |
| 3.23862530  | 11.74626186 | 5.18788069 |
| 8.25285951  | 11.76196058 | 5.16484569 |
| 8.90963639  | 9.20670361  | 5.03789137 |
| 3.87413697  | 9.19614120  | 5.14085978 |
| 7.50648922  | 4.23970733  | 5.04162442 |
| 2.52028545  | 4.22209641  | 5.04105182 |
| 8.18620360  | 6.78027004  | 4.97305453 |
| 3.20145506  | 6.75664224  | 4.90953511 |
| 5.67107490  | 12.40925399 | 4.90031949 |
| 2.48814204  | 0.05302275  | 7.03084939 |
| 3.23797917  | 1.47316762  | 4.83758799 |
| 8.21469178  | 1.46901537  | 4.84301567 |
| 1.40680225  | 9.88190019  | 4.80792667 |
| 6.37846214  | 9.85511386  | 4.68856712 |
| 5.01825555  | 4.87051765  | 4.77083232 |
| 0.02036458  | 4.84868872  | 4.72270517 |
| 0.72164991  | 7.27666079  | 4.72384667 |
| 5.73362369  | 7.32025287  | 4.70467504 |
| 5.74580691  | 2.18268948  | 4.52091496 |
| 0.75245719  | 2.18704385  | 4.50856566 |
| 8.92724419  | 3.16928101  | 3.13275409 |
| 3.93734455  | 3.16928101  | 3.13275409 |
| 9.65447807  | 0.51179242  | 2.92767382 |
| 4.66457796  | 0.51179242  | 2.92767382 |
| 8.19081593  | 10.75315189 | 2.92137337 |
| 3.20091629  | 10.75315189 | 2.92137337 |
| 7.52427816  | 8.16568470  | 2.89047265 |
| 2.53437829  | 8.16568470  | 2.89047265 |
| 6.46140337  | 3.88992119  | 2.81003308 |
| 1.47150326  | 3.88992119  | 2.81003308 |
| 8.23615360  | 5.59719324  | 2.75910425 |
| 3.24625349  | 5.59719324  | 2.75910425 |
| 5.72548342  | 11.29866314 | 2.69921899 |
| 0.73558354  | 11.29866314 | 2.69921899 |

|             |             |            |
|-------------|-------------|------------|
| 5.02271366  | 8.84247589  | 2.64073300 |
| 0.03281343  | 8.84247589  | 2.64073300 |
| 7.16234589  | 1.15467191  | 2.58495903 |
| 2.17244577  | 1.15467191  | 2.58495903 |
| 5.69094276  | 6.28061676  | 2.47308970 |
| 0.70104283  | 6.28061676  | 2.47308970 |
| 4.72644854  | 4.52631235  | 0.98044425 |
| -0.26345146 | 4.52631235  | 0.98044425 |
| 8.98416233  | 2.08401227  | 0.94984233 |
| 3.99426270  | 2.08401227  | 0.94984233 |
| 7.49692297  | 12.16127491 | 0.88189071 |
| 2.50702286  | 12.16127491 | 0.88189071 |
| 8.92881203  | 7.14167833  | 0.77916235 |
| 3.93891239  | 7.14167833  | 0.77916235 |
| 8.23179626  | 9.65808487  | 0.74752367 |
| 3.24189639  | 9.65808487  | 0.74752367 |
| 6.50168800  | 2.71004343  | 0.73384589 |
| 1.51178777  | 2.71004343  | 0.73384589 |
| 5.78449345  | 0.24636792  | 0.66762453 |
| 0.79459333  | 0.24636792  | 0.66762453 |
| 6.40908241  | 7.83185196  | 0.60482943 |
| 1.41918242  | 7.83185196  | 0.60482943 |
| 7.18588972  | 5.31081581  | 0.60368013 |
| 2.19598985  | 5.31081581  | 0.60368013 |
| 5.68450737  | 10.28863907 | 0.50651002 |
| 0.69460732  | 10.28863907 | 0.50651002 |

# CH<sub>2</sub>CH<sub>2</sub>

1.000000000000

|             |             |             |
|-------------|-------------|-------------|
| 9.97980000  | 0.00000000  | 0.00000000  |
| -0.76395804 | 12.66177393 | 0.00000000  |
| 0.00000004  | 0.00000004  | 19.64040000 |

| H | C  | O | Fe |
|---|----|---|----|
| 4 | 41 | 4 | 80 |

Cart

|             |             |            |
|-------------|-------------|------------|
| 8.70235570  | 8.88476116  | 8.98387484 |
| 0.12794369  | 7.80798285  | 9.44932196 |
| 1.58213867  | 9.80832650  | 9.14223901 |
| 0.10202299  | 10.75224793 | 8.69164304 |
| -0.21671010 | 8.60501322  | 8.78917998 |
| 4.61528712  | 2.63095793  | 8.23018053 |
| 9.60371459  | 2.59271905  | 8.22203824 |
| 4.19307511  | 9.25573449  | 7.37471321 |

|             |             |            |
|-------------|-------------|------------|
| 6.69038313  | 7.54881521  | 8.44171630 |
| 2.73441588  | 6.94948248  | 8.71324472 |
| 0.64109513  | 9.77237602  | 8.56696169 |
| 2.19085863  | 4.24892035  | 7.15971364 |
| 7.20698798  | 4.25490929  | 7.20357675 |
| 3.39242761  | 11.89458752 | 7.19709904 |
| 8.39115450  | 11.81402370 | 7.16818593 |
| -0.33979678 | 6.84075700  | 6.37182409 |
| 4.69660936  | 6.71801362  | 6.25910306 |
| 1.72708932  | 1.61436609  | 6.14540555 |
| 6.72397396  | 1.61601609  | 6.17415325 |
| 2.14018930  | 8.27083560  | 5.69413045 |
| 7.18223670  | 8.37127779  | 5.68049374 |
| 9.19280113  | 3.14068933  | 5.29383917 |
| 4.21413644  | 3.14166044  | 5.30162446 |
| 4.66068320  | 10.78951090 | 4.27706484 |
| -0.29655463 | 10.83021682 | 4.29928663 |
| 6.72883764  | 5.71466597  | 4.01965543 |
| 1.73499963  | 5.70153988  | 4.02244857 |
| 7.17306649  | 12.35073785 | 3.63559822 |
| 2.19709225  | 12.34888103 | 3.63659601 |
| 9.22946010  | 7.21047926  | 3.37185018 |
| 4.23884473  | 7.20438833  | 3.33853014 |
| 5.47292232  | 2.23055553  | 2.34193015 |
| 0.48302215  | 2.23055553  | 2.34193015 |
| 6.73540354  | 9.72874641  | 2.00704742 |
| 1.74550355  | 9.72874641  | 2.00704742 |
| 7.98876715  | 3.77819967  | 1.47019899 |
| 2.99886727  | 3.77819967  | 1.47019899 |
| 9.21347809  | 11.29064846 | 1.28800344 |
| 4.22357798  | 11.29064846 | 1.28800344 |
| 5.52626467  | 6.13002825  | 0.45987183 |
| 0.53636485  | 6.13002825  | 0.45987183 |
| 7.45328903  | 1.12937152  | 0.40848067 |
| 2.46338916  | 1.12937152  | 0.40848067 |
| 4.75647831  | 8.73880577  | 0.18583304 |
| -0.23342146 | 8.73880577  | 0.18583304 |
| 2.42207661  | 6.58028379  | 9.78454647 |
| 4.74286218  | 2.48173926  | 9.40967527 |
| 9.75004262  | 2.43754009  | 9.39846476 |
| 6.55966110  | 7.29593269  | 9.60430025 |
| 2.51893625  | 10.18932099 | 7.12619550 |
| 0.02055665  | 10.91149393 | 6.74861180 |
| 3.25051501  | 7.68380561  | 7.17411774 |

|            |             |            |
|------------|-------------|------------|
| 8.19806033 | 7.84549309  | 7.21626045 |
| 0.69352625 | 12.44252366 | 4.87891880 |
| 7.51109453 | 0.05784316  | 7.03243949 |
| 3.87448603 | 5.16774232  | 7.02956256 |
| 8.89375644 | 5.16850469  | 6.95855880 |
| 3.21267634 | 2.71582925  | 6.91984065 |
| 8.20404480 | 2.71739026  | 6.92012326 |
| 0.61026618 | 8.49535359  | 6.92036279 |
| 5.72282241 | 8.31572936  | 6.97704774 |
| 4.96864388 | 10.89913619 | 6.88011008 |
| 7.38252301 | 10.22319462 | 6.87338357 |
| 1.37866073 | 5.89447185  | 6.73276808 |
| 6.42117445 | 5.89864428  | 6.78934208 |
| 0.69196105 | 3.24793913  | 6.72740872 |
| 5.69762697 | 3.26506030  | 6.74154920 |
| 0.00448621 | 0.81845380  | 6.72085835 |
| 5.00282140 | 0.84763183  | 6.72901636 |
| 3.23303570 | 11.74351473 | 5.18458320 |
| 8.24182372 | 11.78199900 | 5.15445817 |
| 8.89126348 | 9.20416490  | 5.01457976 |
| 3.87195171 | 9.19292907  | 5.14671103 |
| 7.51005689 | 4.24150065  | 5.03600094 |
| 2.52330996 | 4.22288226  | 5.03453672 |
| 8.18743189 | 6.77513295  | 4.97297678 |
| 3.19732901 | 6.76373913  | 4.91284109 |
| 5.66612546 | 12.41524964 | 4.90016871 |
| 2.51856805 | 0.07937760  | 7.00615547 |
| 3.24232186 | 1.47965309  | 4.83518343 |
| 8.21539190 | 1.47642640  | 4.84087555 |
| 1.41536483 | 9.85864541  | 4.75842664 |
| 6.37932328 | 9.86653891  | 4.69584106 |
| 5.01590621 | 4.87222875  | 4.76679023 |
| 0.02298363 | 4.85192850  | 4.71489165 |
| 0.71687869 | 7.29896673  | 4.73881467 |
| 5.73431169 | 7.32203476  | 4.70588375 |
| 5.74773298 | 2.18621747  | 4.51908278 |
| 0.75290257 | 2.19049968  | 4.50627935 |
| 8.92724419 | 3.16928101  | 3.13275409 |
| 3.93734455 | 3.16928101  | 3.13275409 |
| 9.65447807 | 0.51179242  | 2.92767382 |
| 4.66457796 | 0.51179242  | 2.92767382 |
| 8.19081593 | 10.75315189 | 2.92137337 |
| 3.20091629 | 10.75315189 | 2.92137337 |
| 7.52427816 | 8.16568470  | 2.89047265 |

|             |             |            |
|-------------|-------------|------------|
| 2.53437829  | 8.16568470  | 2.89047265 |
| 6.46140337  | 3.88992119  | 2.81003308 |
| 1.47150326  | 3.88992119  | 2.81003308 |
| 8.23615360  | 5.59719324  | 2.75910425 |
| 3.24625349  | 5.59719324  | 2.75910425 |
| 5.72548342  | 11.29866314 | 2.69921899 |
| 0.73558354  | 11.29866314 | 2.69921899 |
| 5.02271366  | 8.84247589  | 2.64073300 |
| 0.03281343  | 8.84247589  | 2.64073300 |
| 7.16234589  | 1.15467191  | 2.58495903 |
| 2.17244577  | 1.15467191  | 2.58495903 |
| 5.69094276  | 6.28061676  | 2.47308970 |
| 0.70104283  | 6.28061676  | 2.47308970 |
| 4.72644854  | 4.52631235  | 0.98044425 |
| -0.26345146 | 4.52631235  | 0.98044425 |
| 8.98416233  | 2.08401227  | 0.94984233 |
| 3.99426270  | 2.08401227  | 0.94984233 |
| 7.49692297  | 12.16127491 | 0.88189071 |
| 2.50702286  | 12.16127491 | 0.88189071 |
| 8.92881203  | 7.14167833  | 0.77916235 |
| 3.93891239  | 7.14167833  | 0.77916235 |
| 8.23179626  | 9.65808487  | 0.74752367 |
| 3.24189639  | 9.65808487  | 0.74752367 |
| 6.50168800  | 2.71004343  | 0.73384589 |
| 1.51178777  | 2.71004343  | 0.73384589 |
| 5.78449345  | 0.24636792  | 0.66762453 |
| 0.79459333  | 0.24636792  | 0.66762453 |
| 6.40908241  | 7.83185196  | 0.60482943 |
| 1.41918242  | 7.83185196  | 0.60482943 |
| 7.18588972  | 5.31081581  | 0.60368013 |
| 2.19598985  | 5.31081581  | 0.60368013 |
| 5.68450737  | 10.28863907 | 0.50651002 |
| 0.69460732  | 10.28863907 | 0.50651002 |

# CH<sub>2</sub>CH<sub>2</sub>+H

1.000000000000

|             |             |             |    |
|-------------|-------------|-------------|----|
| 9.97980000  | 0.00000000  | 0.00000000  |    |
| -0.76395804 | 12.66177393 | 0.00000000  |    |
| 0.00000004  | 0.00000004  | 19.64040000 |    |
| H           | C           | O           | Fe |
| 5           | 41          | 4           | 80 |

Cart

|            |            |            |
|------------|------------|------------|
| 8.70818721 | 8.86481413 | 8.97767652 |
|------------|------------|------------|

|             |             |            |
|-------------|-------------|------------|
| 6.21405185  | 11.24802708 | 7.94713284 |
| 0.13518976  | 7.79414473  | 9.44800926 |
| 1.58250290  | 9.80056044  | 9.13966177 |
| 0.10286340  | 10.73459193 | 8.67228423 |
| -0.20925930 | 8.58851044  | 8.78251902 |
| 4.61209408  | 2.62809045  | 8.23219455 |
| 9.60967904  | 2.59328508  | 8.21779773 |
| 4.18256867  | 9.24521268  | 7.37426440 |
| 6.69989102  | 7.52741635  | 8.43757681 |
| 2.75517673  | 6.94919822  | 8.72512584 |
| 0.64608130  | 9.75710600  | 8.55656103 |
| 2.19406454  | 4.24956722  | 7.16270706 |
| 7.20776779  | 4.24905967  | 7.19998938 |
| 3.38022552  | 11.88797492 | 7.20437208 |
| 8.43113163  | 11.83840468 | 7.12669507 |
| -0.34117699 | 6.83355296  | 6.37121044 |
| 4.69869590  | 6.71198348  | 6.25539065 |
| 1.73104916  | 1.62109828  | 6.13944984 |
| 6.72772921  | 1.59245229  | 6.18829316 |
| 2.14319295  | 8.26707153  | 5.69239222 |
| 7.18722119  | 8.38244721  | 5.68701529 |
| 9.19284981  | 3.13912584  | 5.29124682 |
| 4.21747829  | 3.14280009  | 5.30367941 |
| 4.65859153  | 10.78594198 | 4.27276145 |
| -0.29385524 | 10.82460083 | 4.29947914 |
| 6.73033943  | 5.71460164  | 4.01936171 |
| 1.73525678  | 5.70056622  | 4.02287095 |
| 7.17058202  | 12.34993571 | 3.63359407 |
| 2.20018287  | 12.34973277 | 3.63239523 |
| 9.22842573  | 7.20964704  | 3.37137032 |
| 4.23841576  | 7.20459096  | 3.33617351 |
| 5.47292232  | 2.23055553  | 2.34193015 |
| 0.48302215  | 2.23055553  | 2.34193015 |
| 6.73540354  | 9.72874641  | 2.00704742 |
| 1.74550355  | 9.72874641  | 2.00704742 |
| 7.98876715  | 3.77819967  | 1.47019899 |
| 2.99886727  | 3.77819967  | 1.47019899 |
| 9.21347809  | 11.29064846 | 1.28800344 |
| 4.22357798  | 11.29064846 | 1.28800344 |
| 5.52626467  | 6.13002825  | 0.45987183 |
| 0.53636485  | 6.13002825  | 0.45987183 |
| 7.45328903  | 1.12937152  | 0.40848067 |
| 2.46338916  | 1.12937152  | 0.40848067 |
| 4.75647831  | 8.73880577  | 0.18583304 |

|             |             |            |
|-------------|-------------|------------|
| -0.23342146 | 8.73880577  | 0.18583304 |
| 2.45175089  | 6.58027294  | 9.79818484 |
| 4.74525831  | 2.47506469  | 9.41042466 |
| 9.75279668  | 2.43401174  | 9.39411032 |
| 6.55617745  | 7.28103188  | 9.60102075 |
| 2.50833976  | 10.18241650 | 7.11802225 |
| 0.02495958  | 10.89143397 | 6.72354158 |
| 3.25111489  | 7.67479239  | 7.17533812 |
| 8.19606960  | 7.84179762  | 7.21605335 |
| 0.69698592  | 12.44448570 | 4.87257031 |
| 7.51402305  | 0.04077931  | 7.06614216 |
| 3.87805300  | 5.16218861  | 7.03008345 |
| 8.89368684  | 5.16200911  | 6.95839543 |
| 3.21622537  | 2.71539619  | 6.91994494 |
| 8.20157652  | 2.70606154  | 6.91845839 |
| 0.61577671  | 8.47710732  | 6.91619774 |
| 5.72107285  | 8.29977227  | 6.97293665 |
| 4.94286273  | 10.88324178 | 6.92435393 |
| 7.37309813  | 10.24732297 | 6.92195754 |
| 1.37841659  | 5.89121556  | 6.72783438 |
| 6.42289635  | 5.89653093  | 6.79425292 |
| 0.69252130  | 3.25712220  | 6.72696923 |
| 5.70112574  | 3.25724381  | 6.74239670 |
| 0.01242513  | 0.83650312  | 6.70294359 |
| 4.99635422  | 0.84330942  | 6.72451967 |
| 3.23199620  | 11.73880154 | 5.18795203 |
| 8.24197986  | 11.78055061 | 5.14507351 |
| 8.88877343  | 9.20751100  | 5.02747548 |
| 3.87831017  | 9.19352185  | 5.14970418 |
| 7.51064897  | 4.24013474  | 5.03742922 |
| 2.52446232  | 4.22192712  | 5.03389780 |
| 8.18657569  | 6.77679867  | 4.97219083 |
| 3.19870935  | 6.76482806  | 4.91101011 |
| 5.66477917  | 12.41033139 | 4.90829792 |
| 2.51662204  | 0.07963544  | 7.00210642 |
| 3.24755452  | 1.48048623  | 4.83544876 |
| 8.21717728  | 1.46807083  | 4.84381526 |
| 1.41734495  | 9.85062992  | 4.74795557 |
| 6.38021476  | 9.87322474  | 4.71213359 |
| 5.01766805  | 4.87341552  | 4.76790572 |
| 0.02138900  | 4.85218060  | 4.71222978 |
| 0.71676834  | 7.29856447  | 4.73413347 |
| 5.73591602  | 7.32699841  | 4.70089876 |
| 5.75228899  | 2.18453177  | 4.52127360 |



|             |             |            |
|-------------|-------------|------------|
| 0.75442980  | 2.19438946  | 4.50568443 |
| 8.92724419  | 3.16928101  | 3.13275409 |
| 3.93734455  | 3.16928101  | 3.13275409 |
| 9.65447807  | 0.51179242  | 2.92767382 |
| 4.66457796  | 0.51179242  | 2.92767382 |
| 8.19081593  | 10.75315189 | 2.92137337 |
| 3.20091629  | 10.75315189 | 2.92137337 |
| 7.52427816  | 8.16568470  | 2.89047265 |
| 2.53437829  | 8.16568470  | 2.89047265 |
| 6.46140337  | 3.88992119  | 2.81003308 |
| 1.47150326  | 3.88992119  | 2.81003308 |
| 8.23615360  | 5.59719324  | 2.75910425 |
| 3.24625349  | 5.59719324  | 2.75910425 |
| 5.72548342  | 11.29866314 | 2.69921899 |
| 0.73558354  | 11.29866314 | 2.69921899 |
| 5.02271366  | 8.84247589  | 2.64073300 |
| 0.03281343  | 8.84247589  | 2.64073300 |
| 7.16234589  | 1.15467191  | 2.58495903 |
| 2.17244577  | 1.15467191  | 2.58495903 |
| 5.69094276  | 6.28061676  | 2.47308970 |
| 0.70104283  | 6.28061676  | 2.47308970 |
| 4.72644854  | 4.52631235  | 0.98044425 |
| -0.26345146 | 4.52631235  | 0.98044425 |
| 8.98416233  | 2.08401227  | 0.94984233 |
| 3.99426270  | 2.08401227  | 0.94984233 |
| 7.49692297  | 12.16127491 | 0.88189071 |
| 2.50702286  | 12.16127491 | 0.88189071 |
| 8.92881203  | 7.14167833  | 0.77916235 |
| 3.93891239  | 7.14167833  | 0.77916235 |
| 8.23179626  | 9.65808487  | 0.74752367 |
| 3.24189639  | 9.65808487  | 0.74752367 |
| 6.50168800  | 2.71004343  | 0.73384589 |
| 1.51178777  | 2.71004343  | 0.73384589 |
| 5.78449345  | 0.24636792  | 0.66762453 |
| 0.79459333  | 0.24636792  | 0.66762453 |
| 6.40908241  | 7.83185196  | 0.60482943 |
| 1.41918242  | 7.83185196  | 0.60482943 |
| 7.18588972  | 5.31081581  | 0.60368013 |
| 2.19598985  | 5.31081581  | 0.60368013 |
| 5.68450737  | 10.28863907 | 0.50651002 |
| 0.69460732  | 10.28863907 | 0.50651002 |

# CH+H (state1)

1.000000000000

|             |             |             |    |
|-------------|-------------|-------------|----|
| 9.97980000  | 0.00000000  | 0.00000000  |    |
| -0.76395804 | 12.66177393 | 0.00000000  |    |
| 0.00000004  | 0.00000004  | 19.64040000 |    |
| H           | C           | O           | Fe |
| 2           | 41          | 4           | 80 |

Cart

|             |             |            |
|-------------|-------------|------------|
| 6.63798469  | 7.20613877  | 9.30233364 |
| 6.22408752  | 11.30173483 | 7.96766998 |
| 6.75509172  | 7.33051952  | 8.21532413 |
| 4.61251780  | 2.63667564  | 8.23247778 |
| 9.61135845  | 2.63545473  | 8.22366671 |
| 4.19214301  | 9.27868297  | 7.37638513 |
| 1.80129628  | 7.51841502  | 8.40442625 |
| 0.97825650  | 11.26286927 | 8.48185858 |
| 9.14892456  | 9.29260758  | 7.36665118 |
| 2.19282911  | 4.26049209  | 7.19964290 |
| 7.17516433  | 4.27001915  | 7.19689574 |
| 3.45782497  | 11.95117950 | 7.16816420 |
| 8.42058191  | 11.95660634 | 7.18248979 |
| -0.34059835 | 6.75293292  | 6.28503341 |
| 4.65148363  | 6.73131630  | 6.25665061 |
| 1.73706304  | 1.62202704  | 6.17805212 |
| 6.72939635  | 1.62765544  | 6.17259496 |
| 2.16852549  | 8.28555473  | 5.58512049 |
| 7.16231271  | 8.29903756  | 5.54638746 |
| 9.19462350  | 3.13806404  | 5.29577301 |
| 4.20336824  | 3.13441047  | 5.29866097 |
| 4.66810383  | 10.80907183 | 4.26397603 |
| -0.31868217 | 10.81060345 | 4.26054746 |
| 6.71991090  | 5.68978403  | 4.00976118 |
| 1.72832166  | 5.69113883  | 4.01242428 |
| 7.17915896  | 12.34866726 | 3.63684216 |
| 2.18851357  | 12.34994283 | 3.64179340 |
| 9.22494995  | 7.20077951  | 3.32749063 |
| 4.23322070  | 7.20217603  | 3.32299880 |
| 5.47292232  | 2.23055553  | 2.34193015 |
| 0.48302215  | 2.23055553  | 2.34193015 |
| 6.73540354  | 9.72874641  | 2.00704742 |
| 1.74550355  | 9.72874641  | 2.00704742 |
| 7.98876715  | 3.77819967  | 1.47019899 |
| 2.99886727  | 3.77819967  | 1.47019899 |
| 9.21347809  | 11.29064846 | 1.28800344 |
| 4.22357798  | 11.29064846 | 1.28800344 |

|             |             |            |
|-------------|-------------|------------|
| 5.52626467  | 6.13002825  | 0.45987183 |
| 0.53636485  | 6.13002825  | 0.45987183 |
| 7.45328903  | 1.12937152  | 0.40848067 |
| 2.46338916  | 1.12937152  | 0.40848067 |
| 4.75647831  | 8.73880577  | 0.18583304 |
| -0.23342146 | 8.73880577  | 0.18583304 |
| 1.22782551  | 11.34892962 | 9.64021925 |
| 4.74737952  | 2.47673712  | 9.40810582 |
| 9.74566406  | 2.46765193  | 9.39915247 |
| 1.58261060  | 7.30244763  | 9.55852331 |
| 2.54313793  | 10.27878311 | 7.19520878 |
| 0.00380219  | 10.93142440 | 6.99550158 |
| 3.16857573  | 7.77205151  | 7.12224325 |
| 8.16047106  | 7.78190819  | 7.09854517 |
| 0.68179461  | 12.41213993 | 4.91620073 |
| 7.50170834  | 0.08510540  | 7.05861047 |
| 3.85975217  | 5.17203237  | 7.01987193 |
| 8.84474847  | 5.18237567  | 7.03156088 |
| 3.20741068  | 2.72205223  | 6.92309498 |
| 8.19566081  | 2.72883819  | 6.92103655 |
| 0.69130676  | 8.30769748  | 6.93963482 |
| 5.69261047  | 8.28768676  | 6.95920706 |
| 4.99425825  | 10.90476599 | 6.90002690 |
| 7.50318652  | 10.28780498 | 7.17258452 |
| 1.36900708  | 5.89473358  | 6.79932034 |
| 6.35834098  | 5.92803846  | 6.90343119 |
| 0.69418008  | 3.28226220  | 6.73419836 |
| 5.68103372  | 3.28693980  | 6.74097743 |
| 0.00106129  | 0.89926037  | 6.68645682 |
| 5.00524890  | 0.89661962  | 6.68865066 |
| 3.23948979  | 11.76525550 | 5.18339606 |
| 8.22923360  | 11.76763336 | 5.18513050 |
| 8.88441459  | 9.25270476  | 5.11048696 |
| 3.87485832  | 9.24846519  | 5.10820115 |
| 7.50292717  | 4.23381159  | 5.04737136 |
| 2.51788710  | 4.23109422  | 5.04254571 |
| 8.19459480  | 6.76190654  | 4.90101685 |
| 3.19946414  | 6.76236621  | 4.90252326 |
| 5.66855148  | 12.42359898 | 4.89166077 |
| 2.53890169  | 0.09755682  | 7.07631299 |
| 3.23202385  | 1.46729518  | 4.84777453 |
| 8.22070217  | 1.47398982  | 4.84393681 |
| 1.39744574  | 9.90686126  | 4.84832837 |
| 6.38484774  | 9.89907849  | 4.81884548 |

|             |             |            |
|-------------|-------------|------------|
| 5.00938448  | 4.86342162  | 4.75315868 |
| 0.01957058  | 4.85809723  | 4.74624366 |
| 0.72304843  | 7.29368767  | 4.69669270 |
| 5.71522143  | 7.29431508  | 4.69769979 |
| 5.75009291  | 2.19530798  | 4.51561155 |
| 0.76086093  | 2.18793099  | 4.51447329 |
| 8.92724419  | 3.16928101  | 3.13275409 |
| 3.93734455  | 3.16928101  | 3.13275409 |
| 9.65447807  | 0.51179242  | 2.92767382 |
| 4.66457796  | 0.51179242  | 2.92767382 |
| 8.19081593  | 10.75315189 | 2.92137337 |
| 3.20091629  | 10.75315189 | 2.92137337 |
| 7.52427816  | 8.16568470  | 2.89047265 |
| 2.53437829  | 8.16568470  | 2.89047265 |
| 6.46140337  | 3.88992119  | 2.81003308 |
| 1.47150326  | 3.88992119  | 2.81003308 |
| 8.23615360  | 5.59719324  | 2.75910425 |
| 3.24625349  | 5.59719324  | 2.75910425 |
| 5.72548342  | 11.29866314 | 2.69921899 |
| 0.73558354  | 11.29866314 | 2.69921899 |
| 5.02271366  | 8.84247589  | 2.64073300 |
| 0.03281343  | 8.84247589  | 2.64073300 |
| 7.16234589  | 1.15467191  | 2.58495903 |
| 2.17244577  | 1.15467191  | 2.58495903 |
| 5.69094276  | 6.28061676  | 2.47308970 |
| 0.70104283  | 6.28061676  | 2.47308970 |
| 4.72644854  | 4.52631235  | 0.98044425 |
| -0.26345146 | 4.52631235  | 0.98044425 |
| 8.98416233  | 2.08401227  | 0.94984233 |
| 3.99426270  | 2.08401227  | 0.94984233 |
| 7.49692297  | 12.16127491 | 0.88189071 |
| 2.50702286  | 12.16127491 | 0.88189071 |
| 8.92881203  | 7.14167833  | 0.77916235 |
| 3.93891239  | 7.14167833  | 0.77916235 |
| 8.23179626  | 9.65808487  | 0.74752367 |
| 3.24189639  | 9.65808487  | 0.74752367 |
| 6.50168800  | 2.71004343  | 0.73384589 |
| 1.51178777  | 2.71004343  | 0.73384589 |
| 5.78449345  | 0.24636792  | 0.66762453 |
| 0.79459333  | 0.24636792  | 0.66762453 |
| 6.40908241  | 7.83185196  | 0.60482943 |
| 1.41918242  | 7.83185196  | 0.60482943 |
| 7.18588972  | 5.31081581  | 0.60368013 |
| 2.19598985  | 5.31081581  | 0.60368013 |

|            |             |            |
|------------|-------------|------------|
| 5.68450737 | 10.28863907 | 0.50651002 |
| 0.69460732 | 10.28863907 | 0.50651002 |

# CH+H (state2)

1.000000000000

|             |             |             |
|-------------|-------------|-------------|
| 9.97980000  | 0.00000000  | 0.00000000  |
| -0.76395804 | 12.66177393 | 0.00000000  |
| 0.00000004  | 0.00000004  | 19.64040000 |

|   |    |   |    |
|---|----|---|----|
| H | C  | O | Fe |
| 2 | 41 | 4 | 80 |

Cart

|             |             |            |
|-------------|-------------|------------|
| -0.12965310 | 2.33423476  | 9.13106756 |
| 7.78490733  | 1.59742931  | 8.17565853 |
| 9.69422423  | 2.47059074  | 8.05363569 |
| 4.24730690  | 2.41074692  | 8.37352870 |
| 7.21380006  | 4.25188597  | 7.16787489 |
| 4.20861545  | 9.30748994  | 7.37230038 |
| 6.00815867  | 11.41071986 | 8.46137055 |
| 6.76108151  | 7.70497948  | 8.43789894 |
| 9.19680990  | 9.32810248  | 7.36233429 |
| 1.74072672  | 1.62705711  | 6.08403878 |
| 1.79150319  | 7.73243085  | 8.44914318 |
| 3.40053976  | 11.91763094 | 7.20867506 |
| 8.46699999  | 11.97123982 | 7.14940213 |
| -0.33541322 | 6.78068317  | 6.32787771 |
| 4.66611069  | 6.78178808  | 6.32001509 |
| 2.18529133  | 4.26251870  | 7.19179876 |
| 6.70210072  | 1.53369101  | 6.11732362 |
| 2.17792711  | 8.29256429  | 5.59317920 |
| 7.16577098  | 8.28291851  | 5.58075112 |
| 9.20111749  | 3.14549604  | 5.23485637 |
| 4.20523733  | 3.14445898  | 5.29821880 |
| 4.67706759  | 10.81802248 | 4.26867663 |
| -0.31680942 | 10.83159150 | 4.27185296 |
| 6.72855557  | 5.67766285  | 4.01820465 |
| 1.73449701  | 5.69436591  | 4.01524005 |
| 7.17543510  | 12.35387999 | 3.64145012 |
| 2.19139414  | 12.34832060 | 3.63330044 |
| 9.22932449  | 7.19976823  | 3.34140694 |
| 4.24144469  | 7.20293493  | 3.34276333 |
| 5.47292232  | 2.23055553  | 2.34193015 |
| 0.48302215  | 2.23055553  | 2.34193015 |
| 6.73540354  | 9.72874641  | 2.00704742 |

|             |             |            |
|-------------|-------------|------------|
| 1.74550355  | 9.72874641  | 2.00704742 |
| 7.98876715  | 3.77819967  | 1.47019899 |
| 2.99886727  | 3.77819967  | 1.47019899 |
| 9.21347809  | 11.29064846 | 1.28800344 |
| 4.22357798  | 11.29064846 | 1.28800344 |
| 5.52626467  | 6.13002825  | 0.45987183 |
| 0.53636485  | 6.13002825  | 0.45987183 |
| 7.45328903  | 1.12937152  | 0.40848067 |
| 2.46338916  | 1.12937152  | 0.40848067 |
| 4.75647831  | 8.73880577  | 0.18583304 |
| -0.23342146 | 8.73880577  | 0.18583304 |
| 6.64283850  | 7.52672583  | 9.60941577 |
| 4.72736429  | 2.33794084  | 9.45277645 |
| 1.65715725  | 7.55479201  | 9.61970267 |
| 6.18453556  | 11.38243111 | 9.64119480 |
| 2.53556793  | 0.12936447  | 7.03860064 |
| 7.55372480  | 10.31736337 | 7.20237646 |
| 3.18565098  | 7.80097666  | 7.13115030 |
| 8.17264544  | 7.81883607  | 7.13000098 |
| 2.53061396  | 10.24908305 | 7.10580046 |
| 5.67528824  | 12.42316180 | 4.92071879 |
| 1.38485173  | 5.90650683  | 6.76761168 |
| 6.37491935  | 5.88988733  | 6.78601561 |
| 3.20896801  | 2.72690877  | 6.94641127 |
| 8.15141062  | 2.65088258  | 7.00173278 |
| 0.72031947  | 8.35050209  | 6.94485700 |
| 5.70586126  | 8.32320911  | 6.93436345 |
| 5.00107666  | 10.95240646 | 6.97902497 |
| 0.69120892  | 12.44074888 | 4.88424066 |
| 8.88463722  | 5.15456334  | 6.99504103 |
| 3.86575765  | 5.16861381  | 6.96383667 |
| 0.68381139  | 3.29681366  | 6.71398431 |
| 5.68686866  | 3.28175278  | 6.69742050 |
| 8.22886264  | 1.48135168  | 4.86033801 |
| 5.74905926  | 2.19859677  | 4.50408479 |
| 3.24421348  | 11.77353415 | 5.18815533 |
| 8.22280136  | 11.78250139 | 5.18442283 |
| 8.87367425  | 9.25216248  | 5.09353067 |
| 3.90362283  | 9.23602495  | 5.08999060 |
| 7.51811833  | 4.18851430  | 5.08047037 |
| 2.52069182  | 4.20438851  | 5.03636631 |
| 8.20054167  | 6.74516715  | 4.92888982 |
| 3.20792080  | 6.75213256  | 4.92167116 |
| 4.97229504  | 0.87836721  | 6.70914953 |

|             |             |            |
|-------------|-------------|------------|
| 3.24227188  | 1.49326212  | 4.82785208 |
| 0.75135810  | 2.19775530  | 4.49846857 |
| 0.04769571  | 10.94882392 | 6.84006140 |
| 1.40367674  | 9.89188315  | 4.79943510 |
| 6.39886298  | 9.91549418  | 4.85753899 |
| 5.02219546  | 4.84881764  | 4.71951126 |
| 0.03106801  | 4.86068764  | 4.72268514 |
| 0.72344780  | 7.29406723  | 4.70760768 |
| 5.72086422  | 7.27592449  | 4.70383363 |
| 0.07420868  | 0.92860661  | 6.80397950 |
| 7.55690506  | 0.13767221  | 7.17770493 |
| 8.92724419  | 3.16928101  | 3.13275409 |
| 3.93734455  | 3.16928101  | 3.13275409 |
| 9.65447807  | 0.51179242  | 2.92767382 |
| 4.66457796  | 0.51179242  | 2.92767382 |
| 8.19081593  | 10.75315189 | 2.92137337 |
| 3.20091629  | 10.75315189 | 2.92137337 |
| 7.52427816  | 8.16568470  | 2.89047265 |
| 2.53437829  | 8.16568470  | 2.89047265 |
| 6.46140337  | 3.88992119  | 2.81003308 |
| 1.47150326  | 3.88992119  | 2.81003308 |
| 8.23615360  | 5.59719324  | 2.75910425 |
| 3.24625349  | 5.59719324  | 2.75910425 |
| 5.72548342  | 11.29866314 | 2.69921899 |
| 0.73558354  | 11.29866314 | 2.69921899 |
| 5.02271366  | 8.84247589  | 2.64073300 |
| 0.03281343  | 8.84247589  | 2.64073300 |
| 7.16234589  | 1.15467191  | 2.58495903 |
| 2.17244577  | 1.15467191  | 2.58495903 |
| 5.69094276  | 6.28061676  | 2.47308970 |
| 0.70104283  | 6.28061676  | 2.47308970 |
| 4.72644854  | 4.52631235  | 0.98044425 |
| -0.26345146 | 4.52631235  | 0.98044425 |
| 8.98416233  | 2.08401227  | 0.94984233 |
| 3.99426270  | 2.08401227  | 0.94984233 |
| 7.49692297  | 12.16127491 | 0.88189071 |
| 2.50702286  | 12.16127491 | 0.88189071 |
| 8.92881203  | 7.14167833  | 0.77916235 |
| 3.93891239  | 7.14167833  | 0.77916235 |
| 8.23179626  | 9.65808487  | 0.74752367 |
| 3.24189639  | 9.65808487  | 0.74752367 |
| 6.50168800  | 2.71004343  | 0.73384589 |
| 1.51178777  | 2.71004343  | 0.73384589 |
| 5.78449345  | 0.24636792  | 0.66762453 |

|            |             |            |
|------------|-------------|------------|
| 0.79459333 | 0.24636792  | 0.66762453 |
| 6.40908241 | 7.83185196  | 0.60482943 |
| 1.41918242 | 7.83185196  | 0.60482943 |
| 7.18588972 | 5.31081581  | 0.60368013 |
| 2.19598985 | 5.31081581  | 0.60368013 |
| 5.68450737 | 10.28863907 | 0.50651002 |
| 0.69460732 | 10.28863907 | 0.50651002 |

# TS for CH+H->CH<sub>2</sub>

1.000000000000

|             |             |             |
|-------------|-------------|-------------|
| 9.97980000  | 0.00000000  | 0.00000000  |
| -0.76395804 | 12.66177393 | 0.00000000  |
| 0.00000004  | 0.00000004  | 19.64040000 |

| H | C  | O | Fe |
|---|----|---|----|
| 2 | 41 | 4 | 80 |

Cart

|             |             |            |
|-------------|-------------|------------|
| -0.08240744 | 2.27536249  | 9.13239449 |
| 8.08518107  | 1.95213674  | 8.33708333 |
| 9.67140757  | 2.37549830  | 8.06576259 |
| 4.25559479  | 2.40959880  | 8.36618891 |
| 7.21052267  | 4.26623918  | 7.16342490 |
| 4.20384284  | 9.30637290  | 7.36897556 |
| 6.00025294  | 11.32485758 | 8.46783512 |
| 6.76302875  | 7.69916821  | 8.43806912 |
| 9.19607585  | 9.33010162  | 7.36779497 |
| 1.74012722  | 1.62421318  | 6.08804405 |
| 1.79384728  | 7.72780492  | 8.45184943 |
| 3.40194757  | 11.92208508 | 7.21005151 |
| 8.47939175  | 11.96894613 | 7.15825223 |
| -0.33461170 | 6.79305277  | 6.32351877 |
| 4.66048422  | 6.78261308  | 6.31847308 |
| 2.17474203  | 4.25854114  | 7.19902894 |
| 6.70630380  | 1.57746101  | 6.14459669 |
| 2.17669178  | 8.29428753  | 5.59109451 |
| 7.16281557  | 8.28620806  | 5.57891204 |
| 9.20262321  | 3.15155764  | 5.24137939 |
| 4.20059502  | 3.14779990  | 5.30084897 |
| 4.67584786  | 10.81628347 | 4.26720358 |
| -0.31640102 | 10.83014788 | 4.27439296 |
| 6.72597335  | 5.68237292  | 4.01699394 |
| 1.73454660  | 5.69377768  | 4.01497839 |
| 7.17742997  | 12.35252879 | 3.64499007 |
| 2.19380236  | 12.34756640 | 3.63334762 |



|             |             |            |
|-------------|-------------|------------|
| 9.22937129  | 7.19943446  | 3.33903552 |
| 4.24051840  | 7.20224332  | 3.34110258 |
| 5.47292232  | 2.23055553  | 2.34193015 |
| 0.48302215  | 2.23055553  | 2.34193015 |
| 6.73540354  | 9.72874641  | 2.00704742 |
| 1.74550355  | 9.72874641  | 2.00704742 |
| 7.98876715  | 3.77819967  | 1.47019899 |
| 2.99886727  | 3.77819967  | 1.47019899 |
| 9.21347809  | 11.29064846 | 1.28800344 |
| 4.22357798  | 11.29064846 | 1.28800344 |
| 5.52626467  | 6.13002825  | 0.45987183 |
| 0.53636485  | 6.13002825  | 0.45987183 |
| 7.45328903  | 1.12937152  | 0.40848067 |
| 2.46338916  | 1.12937152  | 0.40848067 |
| 4.75647831  | 8.73880577  | 0.18583304 |
| -0.23342146 | 8.73880577  | 0.18583304 |
| 6.63820349  | 7.51722886  | 9.60870022 |
| 4.73826220  | 2.32489213  | 9.44434958 |
| 1.65220828  | 7.54987455  | 9.62068760 |
| 6.22165820  | 11.39591532 | 9.63695475 |
| 2.53361078  | 0.12762165  | 7.04344965 |
| 7.55915943  | 10.32482004 | 7.21203551 |
| 3.18181021  | 7.80043849  | 7.13171654 |
| 8.16955214  | 7.82287379  | 7.13048237 |
| 2.53099672  | 10.25106969 | 7.10157168 |
| 5.67604867  | 12.42375885 | 4.92379693 |
| 1.38025387  | 5.90246881  | 6.77025833 |
| 6.36811511  | 5.89830499  | 6.78463634 |
| 3.20162631  | 2.72629048  | 6.94930160 |
| 8.16146894  | 2.68152916  | 6.97981715 |
| 0.71938265  | 8.35069030  | 6.94657443 |
| 5.70413484  | 8.32375343  | 6.93358322 |
| 5.00192611  | 10.95410600 | 6.99223355 |
| 0.69296496  | 12.44069174 | 4.87968800 |
| 8.87867410  | 5.17811661  | 6.98918395 |
| 3.85890636  | 5.16815979  | 6.96560713 |
| 0.67015811  | 3.28077052  | 6.72854144 |
| 5.67764671  | 3.29491285  | 6.70363288 |
| 8.22176593  | 1.48550360  | 4.85310386 |
| 5.74666155  | 2.19695061  | 4.51126922 |
| 3.24601136  | 11.77224780 | 5.18937138 |
| 8.22388321  | 11.77765314 | 5.18539646 |
| 8.87477991  | 9.25461409  | 5.10392268 |
| 3.90670079  | 9.23812199  | 5.09815644 |

|             |             |            |
|-------------|-------------|------------|
| 7.51491624  | 4.19589962  | 5.07483723 |
| 2.51227574  | 4.20578068  | 5.04269846 |
| 8.19804312  | 6.75237682  | 4.92598331 |
| 3.20504029  | 6.75468806  | 4.92007247 |
| 4.97822876  | 0.88101436  | 6.70822587 |
| 3.24310436  | 1.49295026  | 4.83151324 |
| 0.74957286  | 2.19732415  | 4.50042126 |
| 0.05410301  | 10.94380060 | 6.83278419 |
| 1.40486676  | 9.89180221  | 4.79692370 |
| 6.39801671  | 9.91933359  | 4.85983522 |
| 5.01580763  | 4.85077341  | 4.71716029 |
| 0.02823315  | 4.86278669  | 4.72191575 |
| 0.72292312  | 7.29455258  | 4.70711582 |
| 5.71737340  | 7.27677059  | 4.70360297 |
| 0.06203783  | 0.91765723  | 6.77028502 |
| 7.55714461  | 0.14590093  | 7.14428831 |
| 8.92724419  | 3.16928101  | 3.13275409 |
| 3.93734455  | 3.16928101  | 3.13275409 |
| 9.65447807  | 0.51179242  | 2.92767382 |
| 4.66457796  | 0.51179242  | 2.92767382 |
| 8.19081593  | 10.75315189 | 2.92137337 |
| 3.20091629  | 10.75315189 | 2.92137337 |
| 7.52427816  | 8.16568470  | 2.89047265 |
| 2.53437829  | 8.16568470  | 2.89047265 |
| 6.46140337  | 3.88992119  | 2.81003308 |
| 1.47150326  | 3.88992119  | 2.81003308 |
| 8.23615360  | 5.59719324  | 2.75910425 |
| 3.24625349  | 5.59719324  | 2.75910425 |
| 5.72548342  | 11.29866314 | 2.69921899 |
| 0.73558354  | 11.29866314 | 2.69921899 |
| 5.02271366  | 8.84247589  | 2.64073300 |
| 0.03281343  | 8.84247589  | 2.64073300 |
| 7.16234589  | 1.15467191  | 2.58495903 |
| 2.17244577  | 1.15467191  | 2.58495903 |
| 5.69094276  | 6.28061676  | 2.47308970 |
| 0.70104283  | 6.28061676  | 2.47308970 |
| 4.72644854  | 4.52631235  | 0.98044425 |
| -0.26345146 | 4.52631235  | 0.98044425 |
| 8.98416233  | 2.08401227  | 0.94984233 |
| 3.99426270  | 2.08401227  | 0.94984233 |
| 7.49692297  | 12.16127491 | 0.88189071 |
| 2.50702286  | 12.16127491 | 0.88189071 |
| 8.92881203  | 7.14167833  | 0.77916235 |
| 3.93891239  | 7.14167833  | 0.77916235 |

|            |             |            |
|------------|-------------|------------|
| 8.23179626 | 9.65808487  | 0.74752367 |
| 3.24189639 | 9.65808487  | 0.74752367 |
| 6.50168800 | 2.71004343  | 0.73384589 |
| 1.51178777 | 2.71004343  | 0.73384589 |
| 5.78449345 | 0.24636792  | 0.66762453 |
| 0.79459333 | 0.24636792  | 0.66762453 |
| 6.40908241 | 7.83185196  | 0.60482943 |
| 1.41918242 | 7.83185196  | 0.60482943 |
| 7.18588972 | 5.31081581  | 0.60368013 |
| 2.19598985 | 5.31081581  | 0.60368013 |
| 5.68450737 | 10.28863907 | 0.50651002 |
| 0.69460732 | 10.28863907 | 0.50651002 |

# CH<sub>2</sub>

1.000000000000

|             |             |             |    |
|-------------|-------------|-------------|----|
| 9.97980000  | 0.00000000  | 0.00000000  |    |
| -0.76395804 | 12.66177393 | 0.00000000  |    |
| 0.00000004  | 0.00000004  | 19.64040000 |    |
| H           | C           | O           | Fe |
| 2           | 41          | 4           | 80 |

Cart

|             |             |            |
|-------------|-------------|------------|
| 6.12015810  | 6.93373031  | 9.22278539 |
| 7.67055632  | 7.61500395  | 8.78194205 |
| 6.62548959  | 7.27241167  | 8.30911342 |
| 4.62252971  | 2.61626457  | 8.22131627 |
| 9.60199124  | 2.64000542  | 8.22965953 |
| 4.21564155  | 9.29746745  | 7.37637333 |
| 1.78914458  | 7.56152122  | 8.40875496 |
| 0.99687457  | 11.27682791 | 8.47968019 |
| 9.16406828  | 9.29614365  | 7.31544238 |
| 2.19944865  | 4.25738119  | 7.19740410 |
| 7.18027620  | 4.27863194  | 7.19433577 |
| 3.47258706  | 11.96103783 | 7.15478923 |
| 8.38079215  | 11.92875208 | 7.21965296 |
| -0.32633193 | 6.77007163  | 6.29527190 |
| 4.65536789  | 6.73832054  | 6.27788290 |
| 1.73477761  | 1.61363719  | 6.18633574 |
| 6.73211774  | 1.65565029  | 6.15645602 |
| 2.18193765  | 8.28599143  | 5.58619332 |
| 7.14942830  | 8.31132905  | 5.58743047 |
| 9.19648810  | 3.14018993  | 5.30038967 |
| 4.20233374  | 3.13575368  | 5.29518533 |
| 4.67157931  | 10.81685293 | 4.26775834 |

|             |             |            |
|-------------|-------------|------------|
| -0.32274663 | 10.78745308 | 4.26236468 |
| 6.72290364  | 5.70028571  | 4.01539724 |
| 1.73231576  | 5.69332242  | 4.01117883 |
| 7.18427736  | 12.34852967 | 3.63493982 |
| 2.18276714  | 12.34906953 | 3.64308359 |
| 9.22522411  | 7.20163351  | 3.33425639 |
| 4.23684189  | 7.20152181  | 3.33007466 |
| 5.47292232  | 2.23055553  | 2.34193015 |
| 0.48302215  | 2.23055553  | 2.34193015 |
| 6.73540354  | 9.72874641  | 2.00704742 |
| 1.74550355  | 9.72874641  | 2.00704742 |
| 7.98876715  | 3.77819967  | 1.47019899 |
| 2.99886727  | 3.77819967  | 1.47019899 |
| 9.21347809  | 11.29064846 | 1.28800344 |
| 4.22357798  | 11.29064846 | 1.28800344 |
| 5.52626467  | 6.13002825  | 0.45987183 |
| 0.53636485  | 6.13002825  | 0.45987183 |
| 7.45328903  | 1.12937152  | 0.40848067 |
| 2.46338916  | 1.12937152  | 0.40848067 |
| 4.75647831  | 8.73880577  | 0.18583304 |
| -0.23342146 | 8.73880577  | 0.18583304 |
| 1.25531630  | 11.34368763 | 9.63852973 |
| 4.76365038  | 2.44415405  | 9.39532137 |
| 9.74038576  | 2.48066251  | 9.40568814 |
| 1.61103506  | 7.33609961  | 9.56869068 |
| 2.56737368  | 10.28614696 | 7.20335317 |
| -0.00838975 | 10.94036944 | 7.01512390 |
| 3.18417853  | 7.78431164  | 7.12545228 |
| 8.17067258  | 7.75706966  | 7.16043278 |
| 0.67504884  | 12.40303414 | 4.92184378 |
| 7.50299535  | 0.09927692  | 7.01800958 |
| 3.86753454  | 5.16988397  | 7.00219650 |
| 8.86431844  | 5.18629843  | 7.01378034 |
| 3.20839366  | 2.71872801  | 6.92059093 |
| 8.20226067  | 2.74065005  | 6.92184680 |
| 0.72402723  | 8.31367861  | 6.93574753 |
| 5.70887533  | 8.31421232  | 6.96337024 |
| 5.02149110  | 10.92402151 | 6.83249585 |
| 7.49491748  | 10.25192393 | 7.06906482 |
| 1.38720665  | 5.89545432  | 6.78836850 |
| 6.39371207  | 5.93256135  | 6.85202585 |
| 0.69992091  | 3.27229405  | 6.73610253 |
| 5.68367052  | 3.29581390  | 6.73699662 |
| -0.00534091 | 0.87807277  | 6.70524292 |

|             |             |            |
|-------------|-------------|------------|
| 5.01715143  | 0.90334779  | 6.68626374 |
| 3.23994496  | 11.77299129 | 5.17421770 |
| 8.23349885  | 11.76240682 | 5.18743104 |
| 8.89421552  | 9.22394929  | 5.15739843 |
| 3.88278402  | 9.24515240  | 5.10096327 |
| 7.50724374  | 4.23864822  | 5.04051129 |
| 2.51820930  | 4.23052082  | 5.03878907 |
| 8.18886137  | 6.77434314  | 4.92417592 |
| 3.20579310  | 6.76024178  | 4.91007504 |
| 5.67310308  | 12.43518544 | 4.87761345 |
| 2.54493261  | 0.09470987  | 7.07953765 |
| 3.22692680  | 1.46623768  | 4.84615077 |
| 8.22470347  | 1.48218474  | 4.83955105 |
| 1.40514290  | 9.91097485  | 4.85782521 |
| 6.38496172  | 9.89450834  | 4.78587811 |
| 5.00991809  | 4.86041683  | 4.73584390 |
| 0.02258389  | 4.85655684  | 4.74307259 |
| 0.72446960  | 7.29229430  | 4.69771206 |
| 5.71674878  | 7.29839756  | 4.70767160 |
| 5.74770736  | 2.19883323  | 4.51206902 |
| 0.75983349  | 2.18178179  | 4.51778787 |
| 8.92724419  | 3.16928101  | 3.13275409 |
| 3.93734455  | 3.16928101  | 3.13275409 |
| 9.65447807  | 0.51179242  | 2.92767382 |
| 4.66457796  | 0.51179242  | 2.92767382 |
| 8.19081593  | 10.75315189 | 2.92137337 |
| 3.20091629  | 10.75315189 | 2.92137337 |
| 7.52427816  | 8.16568470  | 2.89047265 |
| 2.53437829  | 8.16568470  | 2.89047265 |
| 6.46140337  | 3.88992119  | 2.81003308 |
| 1.47150326  | 3.88992119  | 2.81003308 |
| 8.23615360  | 5.59719324  | 2.75910425 |
| 3.24625349  | 5.59719324  | 2.75910425 |
| 5.72548342  | 11.29866314 | 2.69921899 |
| 0.73558354  | 11.29866314 | 2.69921899 |
| 5.02271366  | 8.84247589  | 2.64073300 |
| 0.03281343  | 8.84247589  | 2.64073300 |
| 7.16234589  | 1.15467191  | 2.58495903 |
| 2.17244577  | 1.15467191  | 2.58495903 |
| 5.69094276  | 6.28061676  | 2.47308970 |
| 0.70104283  | 6.28061676  | 2.47308970 |
| 4.72644854  | 4.52631235  | 0.98044425 |
| -0.26345146 | 4.52631235  | 0.98044425 |
| 8.98416233  | 2.08401227  | 0.94984233 |

|            |             |            |
|------------|-------------|------------|
| 3.99426270 | 2.08401227  | 0.94984233 |
| 7.49692297 | 12.16127491 | 0.88189071 |
| 2.50702286 | 12.16127491 | 0.88189071 |
| 8.92881203 | 7.14167833  | 0.77916235 |
| 3.93891239 | 7.14167833  | 0.77916235 |
| 8.23179626 | 9.65808487  | 0.74752367 |
| 3.24189639 | 9.65808487  | 0.74752367 |
| 6.50168800 | 2.71004343  | 0.73384589 |
| 1.51178777 | 2.71004343  | 0.73384589 |
| 5.78449345 | 0.24636792  | 0.66762453 |
| 0.79459333 | 0.24636792  | 0.66762453 |
| 6.40908241 | 7.83185196  | 0.60482943 |
| 1.41918242 | 7.83185196  | 0.60482943 |
| 7.18588972 | 5.31081581  | 0.60368013 |
| 2.19598985 | 5.31081581  | 0.60368013 |
| 5.68450737 | 10.28863907 | 0.50651002 |
| 0.69460732 | 10.28863907 | 0.50651002 |

# CH<sub>2</sub>+H (state1)

1.000000000000

|             |             |             |    |
|-------------|-------------|-------------|----|
| 9.97980000  | 0.00000000  | 0.00000000  |    |
| -0.76395804 | 12.66177393 | 0.00000000  |    |
| 0.00000004  | 0.00000004  | 19.64040000 |    |
| H           | C           | O           | Fe |
| 3           | 41          | 4           | 80 |

Cart

|             |             |            |
|-------------|-------------|------------|
| 6.12822649  | 6.96459876  | 9.23421757 |
| 7.68368578  | 7.61280239  | 8.77767687 |
| 6.22780717  | 11.29339456 | 7.96481232 |
| 6.63337466  | 7.27391813  | 8.30900513 |
| 4.61781273  | 2.61894182  | 8.22947131 |
| 9.61164229  | 2.64552779  | 8.22679559 |
| 4.18657720  | 9.29401261  | 7.36077101 |
| 1.80412066  | 7.56344571  | 8.41593365 |
| 0.98971550  | 11.26977292 | 8.48656883 |
| 9.15472453  | 9.30965229  | 7.31542057 |
| 2.20523558  | 4.26253184  | 7.19940863 |
| 7.18556775  | 4.27040678  | 7.18371482 |
| 3.45533072  | 11.95962216 | 7.16119904 |
| 8.42044003  | 11.96503280 | 7.18010235 |
| -0.33575409 | 6.77977903  | 6.30201613 |
| 4.64416103  | 6.74759880  | 6.27213974 |
| 1.74301831  | 1.62672270  | 6.17102488 |

|             |             |            |
|-------------|-------------|------------|
| 6.73521647  | 1.62829553  | 6.16780643 |
| 2.16673638  | 8.28656621  | 5.57492211 |
| 7.13988324  | 8.30244183  | 5.58069460 |
| 9.20025820  | 3.13685673  | 5.29505688 |
| 4.21065969  | 3.13685696  | 5.29794389 |
| 4.66862084  | 10.81090082 | 4.26852236 |
| -0.32327608 | 10.79325978 | 4.26111516 |
| 6.72279700  | 5.69491808  | 4.01372914 |
| 1.73118025  | 5.68883721  | 4.01202963 |
| 7.18118272  | 12.34819701 | 3.63456082 |
| 2.18760085  | 12.34931884 | 3.63805840 |
| 9.22485353  | 7.19987538  | 3.33460014 |
| 4.23453318  | 7.20055034  | 3.32596468 |
| 5.47292232  | 2.23055553  | 2.34193015 |
| 0.48302215  | 2.23055553  | 2.34193015 |
| 6.73540354  | 9.72874641  | 2.00704742 |
| 1.74550355  | 9.72874641  | 2.00704742 |
| 7.98876715  | 3.77819967  | 1.47019899 |
| 2.99886727  | 3.77819967  | 1.47019899 |
| 9.21347809  | 11.29064846 | 1.28800344 |
| 4.22357798  | 11.29064846 | 1.28800344 |
| 5.52626467  | 6.13002825  | 0.45987183 |
| 0.53636485  | 6.13002825  | 0.45987183 |
| 7.45328903  | 1.12937152  | 0.40848067 |
| 2.46338916  | 1.12937152  | 0.40848067 |
| 4.75647831  | 8.73880577  | 0.18583304 |
| -0.23342146 | 8.73880577  | 0.18583304 |
| 1.24554752  | 11.34440633 | 9.64411730 |
| 4.77038922  | 2.45354213  | 9.40313124 |
| 9.75529255  | 2.48867475  | 9.40282587 |
| 1.59551891  | 7.33923496  | 9.56994738 |
| 2.54004178  | 10.29041092 | 7.18388295 |
| 0.00674818  | 10.94109826 | 7.00671445 |
| 3.16738383  | 7.78238285  | 7.11921404 |
| 8.16079272  | 7.77291153  | 7.15876574 |
| 0.67865147  | 12.41465055 | 4.91067776 |
| 7.50034996  | 0.08879995  | 7.06040993 |
| 3.87278720  | 5.17281306  | 7.00388207 |
| 8.86791169  | 5.18077559  | 6.99925272 |
| 3.21723242  | 2.72361714  | 6.92360522 |
| 8.20433388  | 2.72894389  | 6.92014732 |
| 0.71456937  | 8.31937425  | 6.93441029 |
| 5.69371087  | 8.30230061  | 6.96169484 |
| 4.99429231  | 10.91921465 | 6.88962561 |

|            |             |            |
|------------|-------------|------------|
| 7.50319443 | 10.30100654 | 7.13289904 |
| 1.37785910 | 5.89257331  | 6.78411709 |
| 6.38276471 | 5.92415102  | 6.86595212 |
| 0.70357512 | 3.28502048  | 6.73200975 |
| 5.68908346 | 3.28426581  | 6.73687039 |
| 0.00721795 | 0.90242534  | 6.68580609 |
| 5.00822997 | 0.89996751  | 6.68366034 |
| 3.23778167 | 11.76872419 | 5.17804782 |
| 8.23344198 | 11.76733288 | 5.18031427 |
| 8.87898046 | 9.23666132  | 5.16702787 |
| 3.88047303 | 9.24731264  | 5.11459076 |
| 7.50740417 | 4.23545407  | 5.04523670 |
| 2.52138753 | 4.22776157  | 5.04151953 |
| 8.18501016 | 6.77293858  | 4.92432227 |
| 3.19895047 | 6.76131319  | 4.90507378 |
| 5.67053222 | 12.42841349 | 4.88719392 |
| 2.53844300 | 0.10738246  | 7.07703606 |
| 3.23404196 | 1.47226264  | 4.84428984 |
| 8.22566514 | 1.47475050  | 4.84143315 |
| 1.39600027 | 9.90690452  | 4.83718739 |
| 6.38347813 | 9.89599075  | 4.80796570 |
| 5.01166790 | 4.85934126  | 4.73655336 |
| 0.02184492 | 4.85157553  | 4.72918704 |
| 0.71526662 | 7.28539572  | 4.70142025 |
| 5.71083727 | 7.29237138  | 4.70518091 |
| 5.75386364 | 2.19644278  | 4.51097373 |
| 0.76450538 | 2.18997704  | 4.51086772 |
| 8.92724419 | 3.16928101  | 3.13275409 |
| 3.93734455 | 3.16928101  | 3.13275409 |
| 9.65447807 | 0.51179242  | 2.92767382 |
| 4.66457796 | 0.51179242  | 2.92767382 |
| 8.19081593 | 10.75315189 | 2.92137337 |
| 3.20091629 | 10.75315189 | 2.92137337 |
| 7.52427816 | 8.16568470  | 2.89047265 |
| 2.53437829 | 8.16568470  | 2.89047265 |
| 6.46140337 | 3.88992119  | 2.81003308 |
| 1.47150326 | 3.88992119  | 2.81003308 |
| 8.23615360 | 5.59719324  | 2.75910425 |
| 3.24625349 | 5.59719324  | 2.75910425 |
| 5.72548342 | 11.29866314 | 2.69921899 |
| 0.73558354 | 11.29866314 | 2.69921899 |
| 5.02271366 | 8.84247589  | 2.64073300 |
| 0.03281343 | 8.84247589  | 2.64073300 |
| 7.16234589 | 1.15467191  | 2.58495903 |



|             |             |            |
|-------------|-------------|------------|
| 2.17244577  | 1.15467191  | 2.58495903 |
| 5.69094276  | 6.28061676  | 2.47308970 |
| 0.70104283  | 6.28061676  | 2.47308970 |
| 4.72644854  | 4.52631235  | 0.98044425 |
| -0.26345146 | 4.52631235  | 0.98044425 |
| 8.98416233  | 2.08401227  | 0.94984233 |
| 3.99426270  | 2.08401227  | 0.94984233 |
| 7.49692297  | 12.16127491 | 0.88189071 |
| 2.50702286  | 12.16127491 | 0.88189071 |
| 8.92881203  | 7.14167833  | 0.77916235 |
| 3.93891239  | 7.14167833  | 0.77916235 |
| 8.23179626  | 9.65808487  | 0.74752367 |
| 3.24189639  | 9.65808487  | 0.74752367 |
| 6.50168800  | 2.71004343  | 0.73384589 |
| 1.51178777  | 2.71004343  | 0.73384589 |
| 5.78449345  | 0.24636792  | 0.66762453 |
| 0.79459333  | 0.24636792  | 0.66762453 |
| 6.40908241  | 7.83185196  | 0.60482943 |
| 1.41918242  | 7.83185196  | 0.60482943 |
| 7.18588972  | 5.31081581  | 0.60368013 |
| 2.19598985  | 5.31081581  | 0.60368013 |
| 5.68450737  | 10.28863907 | 0.50651002 |
| 0.69460732  | 10.28863907 | 0.50651002 |

# CH<sub>2</sub>+H (state2)

1.000000000000

|             |             |             |    |
|-------------|-------------|-------------|----|
| 9.97980000  | 0.00000000  | 0.00000000  |    |
| -0.76395804 | 12.66177393 | 0.00000000  |    |
| 0.00000004  | 0.00000004  | 19.64040000 |    |
| H           | C           | O           | Fe |
| 3           | 41          | 4           | 80 |

Cart

|            |             |            |
|------------|-------------|------------|
| 0.15321932 | 1.53308991  | 8.60709055 |
| 9.57030300 | 3.09640455  | 9.16137188 |
| 7.85500261 | 1.52801888  | 8.14190088 |
| 9.73097091 | 2.53503734  | 8.22649123 |
| 1.79463871 | 7.70576161  | 8.44649162 |
| 4.60054322 | 2.63290535  | 8.22396424 |
| 4.21415150 | 9.28645344  | 7.39220140 |
| 6.74803544 | 7.61899024  | 8.42664665 |
| 5.97430112 | 11.30759375 | 8.48334998 |
| 7.17513313 | 12.34980878 | 3.64451134 |
| 2.18055274 | 4.27474209  | 7.19051847 |

|             |             |            |
|-------------|-------------|------------|
| 4.66421699  | 6.75899471  | 6.30493236 |
| 3.40081870  | 11.91750930 | 7.21709897 |
| 8.45369174  | 11.94505743 | 7.13290692 |
| -0.33071681 | 6.78323269  | 6.31758167 |
| 6.68485091  | 1.57260631  | 6.10876533 |
| 4.19190520  | 3.14292735  | 5.30576295 |
| 7.19379852  | 4.23485209  | 7.20003396 |
| 2.18493402  | 8.29406284  | 5.59679407 |
| 7.16625165  | 8.28088788  | 5.59329472 |
| 9.19743771  | 3.15487615  | 5.27367486 |
| 1.74901007  | 1.63237174  | 6.14266700 |
| 2.19312359  | 12.34678145 | 3.64434695 |
| 9.22836608  | 7.19982564  | 3.33758258 |
| 6.72768659  | 5.67205697  | 4.01739478 |
| 1.73484622  | 5.70270834  | 4.01270539 |
| 9.19271244  | 9.31128533  | 7.38703117 |
| 4.24093429  | 7.20358603  | 3.33798010 |
| -0.31341015 | 10.82248394 | 4.27384813 |
| 4.67827735  | 10.80606338 | 4.26342898 |
| 5.47292232  | 2.23055553  | 2.34193015 |
| 0.48302215  | 2.23055553  | 2.34193015 |
| 6.73540354  | 9.72874641  | 2.00704742 |
| 1.74550355  | 9.72874641  | 2.00704742 |
| 7.98876715  | 3.77819967  | 1.47019899 |
| 2.99886727  | 3.77819967  | 1.47019899 |
| 9.21347809  | 11.29064846 | 1.28800344 |
| 4.22357798  | 11.29064846 | 1.28800344 |
| 5.52626467  | 6.13002825  | 0.45987183 |
| 0.53636485  | 6.13002825  | 0.45987183 |
| 7.45328903  | 1.12937152  | 0.40848067 |
| 2.46338916  | 1.12937152  | 0.40848067 |
| 4.75647831  | 8.73880577  | 0.18583304 |
| -0.23342146 | 8.73880577  | 0.18583304 |
| 6.20366859  | 11.34879225 | 9.64981203 |
| 1.64407250  | 7.53796213  | 9.61585287 |
| 4.74155781  | 2.47071324  | 9.40014396 |
| 6.63724802  | 7.40137090  | 9.59322342 |
| 2.53686522  | 10.23072416 | 7.10618953 |
| 0.04091191  | 10.91985903 | 6.82981256 |
| 3.18736940  | 7.78568645  | 7.13398062 |
| 8.17382889  | 7.80008961  | 7.13479676 |
| 7.53830569  | 0.13567959  | 7.12405915 |
| 8.22924258  | 1.48277375  | 4.87047107 |
| 3.85999529  | 5.16514349  | 6.98870514 |

|            |             |            |
|------------|-------------|------------|
| 8.85796073 | 5.15503665  | 6.94874408 |
| 3.19576652 | 2.73195414  | 6.91822249 |
| 8.17046736 | 2.65490090  | 7.02127387 |
| 0.72036039 | 8.34901243  | 6.94655329 |
| 5.70153697 | 8.29405883  | 6.94284987 |
| 4.99501264 | 10.93968574 | 7.00059508 |
| 8.24260202 | 11.79626799 | 5.17742333 |
| 1.38064944 | 5.91911790  | 6.77776538 |
| 6.37942416 | 5.87765489  | 6.78800475 |
| 0.66699865 | 3.32428800  | 6.72101595 |
| 5.67621421 | 3.25991613  | 6.72510374 |
| 5.73396545 | 2.19222528  | 4.49965485 |
| 4.96385401 | 0.87725994  | 6.70023629 |
| 0.68301878 | 12.44615828 | 4.88821626 |
| 3.24986213 | 11.75968203 | 5.19171356 |
| 8.87148329 | 9.24318417  | 5.09057810 |
| 3.91146834 | 9.23135573  | 5.09850925 |
| 7.50752717 | 4.18198848  | 5.07453479 |
| 2.50487993 | 4.22783072  | 5.03215575 |
| 8.19685045 | 6.74655322  | 4.92321257 |
| 3.21024168 | 6.75786389  | 4.91612767 |
| 3.23346163 | 1.47835158  | 4.83401918 |
| 7.55427425 | 10.29782104 | 7.19878783 |
| 5.66970775 | 12.41988737 | 4.92002376 |
| 2.51837047 | 0.08719545  | 7.03175856 |
| 1.40418352 | 9.89110944  | 4.80192978 |
| 6.40060847 | 9.91437125  | 4.87503666 |
| 5.01796321 | 4.84943485  | 4.74134821 |
| 0.02392065 | 4.86489265  | 4.70553012 |
| 0.72544766 | 7.30160689  | 4.70469200 |
| 5.72401797 | 7.27874654  | 4.69903539 |
| 0.74469683 | 2.18961586  | 4.52642074 |
| 0.04104047 | 0.91333765  | 6.77843016 |
| 8.92724419 | 3.16928101  | 3.13275409 |
| 3.93734455 | 3.16928101  | 3.13275409 |
| 9.65447807 | 0.51179242  | 2.92767382 |
| 4.66457796 | 0.51179242  | 2.92767382 |
| 8.19081593 | 10.75315189 | 2.92137337 |
| 3.20091629 | 10.75315189 | 2.92137337 |
| 7.52427816 | 8.16568470  | 2.89047265 |
| 2.53437829 | 8.16568470  | 2.89047265 |
| 6.46140337 | 3.88992119  | 2.81003308 |
| 1.47150326 | 3.88992119  | 2.81003308 |
| 8.23615360 | 5.59719324  | 2.75910425 |

|             |             |            |
|-------------|-------------|------------|
| 3.24625349  | 5.59719324  | 2.75910425 |
| 5.72548342  | 11.29866314 | 2.69921899 |
| 0.73558354  | 11.29866314 | 2.69921899 |
| 5.02271366  | 8.84247589  | 2.64073300 |
| 0.03281343  | 8.84247589  | 2.64073300 |
| 7.16234589  | 1.15467191  | 2.58495903 |
| 2.17244577  | 1.15467191  | 2.58495903 |
| 5.69094276  | 6.28061676  | 2.47308970 |
| 0.70104283  | 6.28061676  | 2.47308970 |
| 4.72644854  | 4.52631235  | 0.98044425 |
| -0.26345146 | 4.52631235  | 0.98044425 |
| 8.98416233  | 2.08401227  | 0.94984233 |
| 3.99426270  | 2.08401227  | 0.94984233 |
| 7.49692297  | 12.16127491 | 0.88189071 |
| 2.50702286  | 12.16127491 | 0.88189071 |
| 8.92881203  | 7.14167833  | 0.77916235 |
| 3.93891239  | 7.14167833  | 0.77916235 |
| 8.23179626  | 9.65808487  | 0.74752367 |
| 3.24189639  | 9.65808487  | 0.74752367 |
| 6.50168800  | 2.71004343  | 0.73384589 |
| 1.51178777  | 2.71004343  | 0.73384589 |
| 5.78449345  | 0.24636792  | 0.66762453 |
| 0.79459333  | 0.24636792  | 0.66762453 |
| 6.40908241  | 7.83185196  | 0.60482943 |
| 1.41918242  | 7.83185196  | 0.60482943 |
| 7.18588972  | 5.31081581  | 0.60368013 |
| 2.19598985  | 5.31081581  | 0.60368013 |
| 5.68450737  | 10.28863907 | 0.50651002 |
| 0.69460732  | 10.28863907 | 0.50651002 |

# TS for CH<sub>2</sub>+H->CH<sub>3</sub>

1.000000000000

|             |             |             |    |
|-------------|-------------|-------------|----|
| 9.97980000  | 0.00000000  | 0.00000000  |    |
| -0.76395804 | 12.66177393 | 0.00000000  |    |
| 0.00000004  | 0.00000004  | 19.64040000 |    |
| H           | C           | O           | Fe |
| 3           | 41          | 4           | 80 |

Cart

|            |            |            |
|------------|------------|------------|
| 0.05681819 | 1.41710289 | 8.59467727 |
| 9.75313118 | 3.04278403 | 9.16141847 |
| 8.10073087 | 1.90682132 | 8.34273161 |
| 9.69175178 | 2.44631787 | 8.23972889 |
| 1.79437805 | 7.70344495 | 8.44864782 |

|             |             |            |
|-------------|-------------|------------|
| 4.59872009  | 2.63632596  | 8.23045560 |
| 4.20406613  | 9.29362896  | 7.37715666 |
| 6.75861074  | 7.60544150  | 8.42157811 |
| 5.97672720  | 11.29249284 | 8.47678251 |
| 7.17656803  | 12.35079430 | 3.64426179 |
| 2.17897419  | 4.27007233  | 7.19497435 |
| 4.65824779  | 6.76793859  | 6.30767060 |
| 3.39952736  | 11.92577416 | 7.21270060 |
| 8.45538944  | 11.95109138 | 7.13210867 |
| -0.33381058 | 6.79502839  | 6.31808526 |
| 6.69632289  | 1.60524926  | 6.13450890 |
| 4.19670695  | 3.14411299  | 5.30604150 |
| 7.19498424  | 4.24573474  | 7.19798960 |
| 2.17767386  | 8.29529390  | 5.59408974 |
| 7.16191261  | 8.28614486  | 5.58610395 |
| 9.20413874  | 3.15616843  | 5.27629443 |
| 1.75565378  | 1.63859807  | 6.13784187 |
| 2.19488292  | 12.34712168 | 3.64054369 |
| 9.22841256  | 7.19934260  | 3.33708889 |
| 6.72508825  | 5.67629391  | 4.01715978 |
| 1.73518025  | 5.70135182  | 4.01370478 |
| 9.18922999  | 9.31863211  | 7.38624699 |
| 4.24003566  | 7.20218745  | 3.33755540 |
| -0.31547645 | 10.82370409 | 4.27585318 |
| 4.67573064  | 10.80879025 | 4.26432924 |
| 5.47292232  | 2.23055553  | 2.34193015 |
| 0.48302215  | 2.23055553  | 2.34193015 |
| 6.73540354  | 9.72874641  | 2.00704742 |
| 1.74550355  | 9.72874641  | 2.00704742 |
| 7.98876715  | 3.77819967  | 1.47019899 |
| 2.99886727  | 3.77819967  | 1.47019899 |
| 9.21347809  | 11.29064846 | 1.28800344 |
| 4.22357798  | 11.29064846 | 1.28800344 |
| 5.52626467  | 6.13002825  | 0.45987183 |
| 0.53636485  | 6.13002825  | 0.45987183 |
| 7.45328903  | 1.12937152  | 0.40848067 |
| 2.46338916  | 1.12937152  | 0.40848067 |
| 4.75647831  | 8.73880577  | 0.18583304 |
| -0.23342146 | 8.73880577  | 0.18583304 |
| 6.22783727  | 11.36996072 | 9.63849898 |
| 1.63982713  | 7.52333848  | 9.61673410 |
| 4.74878970  | 2.46841686  | 9.40454384 |
| 6.62223962  | 7.37323904  | 9.58354765 |
| 2.52908755  | 10.24086388 | 7.10149509 |

|            |             |            |
|------------|-------------|------------|
| 0.03914240 | 10.92314568 | 6.82576471 |
| 3.18032392 | 7.79023775  | 7.13307105 |
| 8.16916865 | 7.80892162  | 7.13239857 |
| 7.53230654 | 0.14601238  | 7.11035798 |
| 8.22222149 | 1.49077067  | 4.86015692 |
| 3.85951166 | 5.16918153  | 6.98723632 |
| 8.85773810 | 5.17185720  | 6.95036998 |
| 3.19948744 | 2.73450799  | 6.92258998 |
| 8.17986212 | 2.68394124  | 6.99823735 |
| 0.71635288 | 8.34959494  | 6.94876384 |
| 5.70033943 | 8.30279971  | 6.93980335 |
| 4.99298983 | 10.94479527 | 7.00039796 |
| 8.23935466 | 11.79319486 | 5.17572365 |
| 1.37453015 | 5.90888805  | 6.77384517 |
| 6.37202408 | 5.88437319  | 6.78854094 |
| 0.66752813 | 3.29859811  | 6.72946947 |
| 5.67152716 | 3.27021753  | 6.72763963 |
| 5.73851162 | 2.19129630  | 4.50469252 |
| 4.97332140 | 0.88158153  | 6.69978377 |
| 0.68297071 | 12.44604802 | 4.87994581 |
| 3.24940215 | 11.76442297 | 5.18931965 |
| 8.87189955 | 9.24683432  | 5.09763494 |
| 3.90968137 | 9.23662729  | 5.10563105 |
| 7.50765077 | 4.18690233  | 5.07121805 |
| 2.50452506 | 4.22726522  | 5.03789807 |
| 8.19412120 | 6.75056073  | 4.92230481 |
| 3.20594283 | 6.76093951  | 4.91591585 |
| 3.23783207 | 1.48260094  | 4.83498250 |
| 7.55031449 | 10.30798570 | 7.20021267 |
| 5.67314255 | 12.42090151 | 4.92114834 |
| 2.51760682 | 0.09438765  | 7.02908939 |
| 1.40361171 | 9.89234044  | 4.79983397 |
| 6.39902908 | 9.91633024  | 4.86490593 |
| 5.01352729 | 4.85114295  | 4.73364327 |
| 0.02543448 | 4.86277494  | 4.70786011 |
| 0.72171277 | 7.29886186  | 4.70610403 |
| 5.71882435 | 7.27867535  | 4.70115965 |
| 0.74977711 | 2.19331490  | 4.51702458 |
| 0.04440101 | 0.90122827  | 6.72882299 |
| 8.92724419 | 3.16928101  | 3.13275409 |
| 3.93734455 | 3.16928101  | 3.13275409 |
| 9.65447807 | 0.51179242  | 2.92767382 |
| 4.66457796 | 0.51179242  | 2.92767382 |
| 8.19081593 | 10.75315189 | 2.92137337 |

|             |             |            |
|-------------|-------------|------------|
| 3.20091629  | 10.75315189 | 2.92137337 |
| 7.52427816  | 8.16568470  | 2.89047265 |
| 2.53437829  | 8.16568470  | 2.89047265 |
| 6.46140337  | 3.88992119  | 2.81003308 |
| 1.47150326  | 3.88992119  | 2.81003308 |
| 8.23615360  | 5.59719324  | 2.75910425 |
| 3.24625349  | 5.59719324  | 2.75910425 |
| 5.72548342  | 11.29866314 | 2.69921899 |
| 0.73558354  | 11.29866314 | 2.69921899 |
| 5.02271366  | 8.84247589  | 2.64073300 |
| 0.03281343  | 8.84247589  | 2.64073300 |
| 7.16234589  | 1.15467191  | 2.58495903 |
| 2.17244577  | 1.15467191  | 2.58495903 |
| 5.69094276  | 6.28061676  | 2.47308970 |
| 0.70104283  | 6.28061676  | 2.47308970 |
| 4.72644854  | 4.52631235  | 0.98044425 |
| -0.26345146 | 4.52631235  | 0.98044425 |
| 8.98416233  | 2.08401227  | 0.94984233 |
| 3.99426270  | 2.08401227  | 0.94984233 |
| 7.49692297  | 12.16127491 | 0.88189071 |
| 2.50702286  | 12.16127491 | 0.88189071 |
| 8.92881203  | 7.14167833  | 0.77916235 |
| 3.93891239  | 7.14167833  | 0.77916235 |
| 8.23179626  | 9.65808487  | 0.74752367 |
| 3.24189639  | 9.65808487  | 0.74752367 |
| 6.50168800  | 2.71004343  | 0.73384589 |
| 1.51178777  | 2.71004343  | 0.73384589 |
| 5.78449345  | 0.24636792  | 0.66762453 |
| 0.79459333  | 0.24636792  | 0.66762453 |
| 6.40908241  | 7.83185196  | 0.60482943 |
| 1.41918242  | 7.83185196  | 0.60482943 |
| 7.18588972  | 5.31081581  | 0.60368013 |
| 2.19598985  | 5.31081581  | 0.60368013 |
| 5.68450737  | 10.28863907 | 0.50651002 |
| 0.69460732  | 10.28863907 | 0.50651002 |

# CH<sub>3</sub>

1.000000000000

|             |             |             |    |
|-------------|-------------|-------------|----|
| 9.97980000  | 0.00000000  | 0.00000000  |    |
| -0.76395804 | 12.66177393 | 0.00000000  |    |
| 0.00000004  | 0.00000004  | 19.64040000 |    |
| H           | C           | O           | Fe |
| 3           | 41          | 4           | 80 |

Cart

|             |             |            |
|-------------|-------------|------------|
| 6.47656319  | 6.30109570  | 8.99430918 |
| 7.72667773  | 7.56818170  | 9.07883632 |
| 6.00858497  | 8.02256856  | 8.99438798 |
| 6.74975911  | 7.29689778  | 8.58883987 |
| 4.62896792  | 2.60948873  | 8.22371035 |
| 9.60245911  | 2.64824538  | 8.23313462 |
| 4.17610576  | 9.33229924  | 7.33497403 |
| 1.79875903  | 7.58262846  | 8.40804901 |
| 0.98730992  | 11.27256151 | 8.47744587 |
| 9.15818628  | 9.31016217  | 7.32918960 |
| 2.20782568  | 4.26215071  | 7.19846528 |
| 7.19887704  | 4.26839665  | 7.18440185 |
| 3.46624862  | 11.97549167 | 7.15624118 |
| 8.37584831  | 11.93631171 | 7.21032404 |
| -0.31755217 | 6.77637907  | 6.30536741 |
| 4.64942499  | 6.76388056  | 6.31945974 |
| 1.73966718  | 1.62088134  | 6.17816514 |
| 6.73471249  | 1.65406162  | 6.14947348 |
| 2.17304421  | 8.28830267  | 5.56295311 |
| 7.15961643  | 8.30059497  | 5.61153333 |
| 9.20162985  | 3.14031257  | 5.29873266 |
| 4.21153410  | 3.13988557  | 5.29877224 |
| 4.67088845  | 10.82043952 | 4.27359933 |
| -0.32147496 | 10.80484552 | 4.26300585 |
| 6.72641956  | 5.70125930  | 4.01365258 |
| 1.73474319  | 5.69014298  | 4.01116912 |
| 7.18268464  | 12.34934981 | 3.63320615 |
| 2.18391400  | 12.35008095 | 3.63824120 |
| 9.22651106  | 7.20090567  | 3.33518387 |
| 4.23995229  | 7.19827394  | 3.33953440 |
| 5.47292232  | 2.23055553  | 2.34193015 |
| 0.48302215  | 2.23055553  | 2.34193015 |
| 6.73540354  | 9.72874641  | 2.00704742 |
| 1.74550355  | 9.72874641  | 2.00704742 |
| 7.98876715  | 3.77819967  | 1.47019899 |
| 2.99886727  | 3.77819967  | 1.47019899 |
| 9.21347809  | 11.29064846 | 1.28800344 |
| 4.22357798  | 11.29064846 | 1.28800344 |
| 5.52626467  | 6.13002825  | 0.45987183 |
| 0.53636485  | 6.13002825  | 0.45987183 |
| 7.45328903  | 1.12937152  | 0.40848067 |
| 2.46338916  | 1.12937152  | 0.40848067 |
| 4.75647831  | 8.73880577  | 0.18583304 |



|             |             |            |
|-------------|-------------|------------|
| -0.23342146 | 8.73880577  | 0.18583304 |
| 1.24629061  | 11.33443702 | 9.63798648 |
| 4.77718562  | 2.43804008  | 9.39755227 |
| 9.74601872  | 2.50332311  | 9.41054946 |
| 1.59570752  | 7.35528346  | 9.56412792 |
| 2.54591116  | 10.31355546 | 7.18660112 |
| -0.00880435 | 10.95272813 | 7.00338741 |
| 3.17441672  | 7.80295830  | 7.11599791 |
| 8.18428972  | 7.76845772  | 7.14071780 |
| 0.67714334  | 12.41700364 | 4.91473285 |
| 7.49753972  | 0.10376310  | 7.02307766 |
| 3.87894511  | 5.17028385  | 6.99404390 |
| 8.88278618  | 5.17166721  | 6.96804265 |
| 3.21758181  | 2.72283292  | 6.92418531 |
| 8.21288100  | 2.73523301  | 6.91890469 |
| 0.71480468  | 8.32693014  | 6.92511052 |
| 5.71128092  | 8.35763710  | 6.96281428 |
| 5.01630798  | 10.93988721 | 6.82728688 |
| 7.49866526  | 10.25579655 | 7.04233909 |
| 1.39308640  | 5.89693225  | 6.77556331 |
| 6.40243395  | 5.93155050  | 6.84680231 |
| 0.70926386  | 3.27431273  | 6.73486131 |
| 5.69425558  | 3.28995864  | 6.73620355 |
| 0.00060901  | 0.88135374  | 6.70471185 |
| 5.01642533  | 0.90852911  | 6.68233416 |
| 3.23513028  | 11.77780539 | 5.17296625 |
| 8.23263618  | 11.77358771 | 5.18256208 |
| 8.89538428  | 9.23232085  | 5.12849909 |
| 3.89282370  | 9.24652155  | 5.11898203 |
| 7.50499044  | 4.24061499  | 5.04463954 |
| 2.52182650  | 4.22609066  | 5.04051068 |
| 8.18710880  | 6.76895554  | 4.92157695 |
| 3.20843586  | 6.75501488  | 4.91756329 |
| 5.67205431  | 12.43661037 | 4.87611254 |
| 2.54022575  | 0.10902143  | 7.08355578 |
| 3.23060556  | 1.47522968  | 4.84388778 |
| 8.22546019  | 1.48518819  | 4.83581911 |
| 1.40264954  | 9.91370143  | 4.84709406 |
| 6.38841672  | 9.88547529  | 4.78800474 |
| 5.01564419  | 4.85751866  | 4.73085496 |
| 0.02681614  | 4.84854679  | 4.72310081 |
| 0.72307654  | 7.28295848  | 4.69924522 |
| 5.71188347  | 7.29124664  | 4.72727112 |
| 5.74910407  | 2.20010966  | 4.50782352 |

|             |             |            |
|-------------|-------------|------------|
| 0.76245320  | 2.18654162  | 4.51365114 |
| 8.92724419  | 3.16928101  | 3.13275409 |
| 3.93734455  | 3.16928101  | 3.13275409 |
| 9.65447807  | 0.51179242  | 2.92767382 |
| 4.66457796  | 0.51179242  | 2.92767382 |
| 8.19081593  | 10.75315189 | 2.92137337 |
| 3.20091629  | 10.75315189 | 2.92137337 |
| 7.52427816  | 8.16568470  | 2.89047265 |
| 2.53437829  | 8.16568470  | 2.89047265 |
| 6.46140337  | 3.88992119  | 2.81003308 |
| 1.47150326  | 3.88992119  | 2.81003308 |
| 8.23615360  | 5.59719324  | 2.75910425 |
| 3.24625349  | 5.59719324  | 2.75910425 |
| 5.72548342  | 11.29866314 | 2.69921899 |
| 0.73558354  | 11.29866314 | 2.69921899 |
| 5.02271366  | 8.84247589  | 2.64073300 |
| 0.03281343  | 8.84247589  | 2.64073300 |
| 7.16234589  | 1.15467191  | 2.58495903 |
| 2.17244577  | 1.15467191  | 2.58495903 |
| 5.69094276  | 6.28061676  | 2.47308970 |
| 0.70104283  | 6.28061676  | 2.47308970 |
| 4.72644854  | 4.52631235  | 0.98044425 |
| -0.26345146 | 4.52631235  | 0.98044425 |
| 8.98416233  | 2.08401227  | 0.94984233 |
| 3.99426270  | 2.08401227  | 0.94984233 |
| 7.49692297  | 12.16127491 | 0.88189071 |
| 2.50702286  | 12.16127491 | 0.88189071 |
| 8.92881203  | 7.14167833  | 0.77916235 |
| 3.93891239  | 7.14167833  | 0.77916235 |
| 8.23179626  | 9.65808487  | 0.74752367 |
| 3.24189639  | 9.65808487  | 0.74752367 |
| 6.50168800  | 2.71004343  | 0.73384589 |
| 1.51178777  | 2.71004343  | 0.73384589 |
| 5.78449345  | 0.24636792  | 0.66762453 |
| 0.79459333  | 0.24636792  | 0.66762453 |
| 6.40908241  | 7.83185196  | 0.60482943 |
| 1.41918242  | 7.83185196  | 0.60482943 |
| 7.18588972  | 5.31081581  | 0.60368013 |
| 2.19598985  | 5.31081581  | 0.60368013 |
| 5.68450737  | 10.28863907 | 0.50651002 |
| 0.69460732  | 10.28863907 | 0.50651002 |

# CH<sub>3</sub>+H

1.000000000000

|             |             |             |    |
|-------------|-------------|-------------|----|
| 9.97980000  | 0.00000000  | 0.00000000  |    |
| -0.76395804 | 12.66177393 | 0.00000000  |    |
| 0.00000004  | 0.00000004  | 19.64040000 |    |
| H           | C           | O           | Fe |
| 4           | 41          | 4           | 80 |

Cart

|             |             |            |
|-------------|-------------|------------|
| 6.43870766  | 6.21570804  | 8.87877735 |
| 7.72556656  | 7.40717226  | 9.15888744 |
| 6.22565650  | 11.26855905 | 7.98318624 |
| 6.03570986  | 7.95052258  | 9.02347296 |
| 6.77380500  | 7.23869973  | 8.59332250 |
| 4.60762748  | 2.59519966  | 8.22685752 |
| 9.60990282  | 2.64749427  | 8.22508116 |
| 4.14995003  | 9.30165536  | 7.35725777 |
| 1.81799171  | 7.43933813  | 8.39613029 |
| 0.96272634  | 11.26022129 | 8.49057875 |
| 9.14398948  | 9.29679743  | 7.34344711 |
| 2.20348082  | 4.25141345  | 7.19241594 |
| 7.19469031  | 4.24505631  | 7.17466199 |
| 3.44436956  | 11.95546683 | 7.16957430 |
| 8.41351752  | 11.95160192 | 7.17783910 |
| -0.32869736 | 6.76084987  | 6.30488214 |
| 4.64376483  | 6.74826784  | 6.31159718 |
| 1.73804127  | 1.61641395  | 6.16389193 |
| 6.73169381  | 1.60898983  | 6.16636783 |
| 2.16574616  | 8.28012973  | 5.57277313 |
| 7.15447875  | 8.28665313  | 5.61514294 |
| 9.19724205  | 3.12701457  | 5.29033529 |
| 4.20975770  | 3.13145655  | 5.29810175 |
| 4.66539547  | 10.79636763 | 4.26388240 |
| -0.32349119 | 10.78674405 | 4.26026859 |
| 6.72299980  | 5.69409408  | 4.01451074 |
| 1.73159198  | 5.68631418  | 4.01225205 |
| 7.18007067  | 12.34534521 | 3.63640924 |
| 2.18853245  | 12.34736248 | 3.63913382 |
| 9.22508382  | 7.19983695  | 3.33673637 |
| 4.23793493  | 7.19871521  | 3.33768972 |
| 5.47292232  | 2.23055553  | 2.34193015 |
| 0.48302215  | 2.23055553  | 2.34193015 |
| 6.73540354  | 9.72874641  | 2.00704742 |
| 1.74550355  | 9.72874641  | 2.00704742 |
| 7.98876715  | 3.77819967  | 1.47019899 |
| 2.99886727  | 3.77819967  | 1.47019899 |

|             |             |            |
|-------------|-------------|------------|
| 9.21347809  | 11.29064846 | 1.28800344 |
| 4.22357798  | 11.29064846 | 1.28800344 |
| 5.52626467  | 6.13002825  | 0.45987183 |
| 0.53636485  | 6.13002825  | 0.45987183 |
| 7.45328903  | 1.12937152  | 0.40848067 |
| 2.46338916  | 1.12937152  | 0.40848067 |
| 4.75647831  | 8.73880577  | 0.18583304 |
| -0.23342146 | 8.73880577  | 0.18583304 |
| 1.21816054  | 11.34730987 | 9.64703678 |
| 4.77635139  | 2.42965062  | 9.39847852 |
| 9.73599454  | 2.50215509  | 9.40395520 |
| 1.56929584  | 7.17206389  | 9.53482069 |
| 2.52440848  | 10.29068036 | 7.18480051 |
| -0.00081904 | 10.92918257 | 7.00064966 |
| 3.16712998  | 7.77105577  | 7.12079696 |
| 8.17165386  | 7.75661878  | 7.14238593 |
| 0.67747141  | 12.40792820 | 4.91014080 |
| 7.49381187  | 0.07222501  | 7.06771907 |
| 3.87500555  | 5.15512981  | 6.99629795 |
| 8.87763189  | 5.15123222  | 6.96449486 |
| 3.21448714  | 2.71107655  | 6.92129426 |
| 8.20388688  | 2.70976986  | 6.91277499 |
| 0.70166708  | 8.30542326  | 6.94018574 |
| 5.70463106  | 8.33750398  | 6.97131195 |
| 4.98521668  | 10.91402778 | 6.91144033 |
| 7.49857204  | 10.27991073 | 7.12503058 |
| 1.38264594  | 5.88413061  | 6.77711511 |
| 6.40132128  | 5.90664568  | 6.82137030 |
| 0.70206159  | 3.27316426  | 6.72857908 |
| 5.69153364  | 3.26446318  | 6.73393154 |
| 0.00285698  | 0.88850312  | 6.68406123 |
| 5.00223913  | 0.88936586  | 6.68585108 |
| 3.23577445  | 11.75743882 | 5.18238504 |
| 8.23013635  | 11.75823987 | 5.18098409 |
| 8.88260732  | 9.22887377  | 5.14808937 |
| 3.88960168  | 9.23991196  | 5.13936929 |
| 7.50232068  | 4.22798085  | 5.04232732 |
| 2.51940637  | 4.21841721  | 5.03838043 |
| 8.18226579  | 6.76176727  | 4.92043436 |
| 3.20457854  | 6.75266661  | 4.91277608 |
| 5.66724007  | 12.41188374 | 4.89504218 |
| 2.52994365  | 0.10267975  | 7.07747114 |
| 3.23368826  | 1.46437452  | 4.84133851 |
| 8.22150875  | 1.46279881  | 4.83771921 |

|             |             |            |
|-------------|-------------|------------|
| 1.39459811  | 9.89839869  | 4.84588288 |
| 6.38411899  | 9.88183488  | 4.81940528 |
| 5.01204854  | 4.85103845  | 4.73281380 |
| 0.02144219  | 4.84360460  | 4.72191258 |
| 0.71768263  | 7.27955479  | 4.70350910 |
| 5.70684853  | 7.28750235  | 4.72630418 |
| 5.75143984  | 2.18855203  | 4.50972681 |
| 0.76155161  | 2.18313534  | 4.50721122 |
| 8.92724419  | 3.16928101  | 3.13275409 |
| 3.93734455  | 3.16928101  | 3.13275409 |
| 9.65447807  | 0.51179242  | 2.92767382 |
| 4.66457796  | 0.51179242  | 2.92767382 |
| 8.19081593  | 10.75315189 | 2.92137337 |
| 3.20091629  | 10.75315189 | 2.92137337 |
| 7.52427816  | 8.16568470  | 2.89047265 |
| 2.53437829  | 8.16568470  | 2.89047265 |
| 6.46140337  | 3.88992119  | 2.81003308 |
| 1.47150326  | 3.88992119  | 2.81003308 |
| 8.23615360  | 5.59719324  | 2.75910425 |
| 3.24625349  | 5.59719324  | 2.75910425 |
| 5.72548342  | 11.29866314 | 2.69921899 |
| 0.73558354  | 11.29866314 | 2.69921899 |
| 5.02271366  | 8.84247589  | 2.64073300 |
| 0.03281343  | 8.84247589  | 2.64073300 |
| 7.16234589  | 1.15467191  | 2.58495903 |
| 2.17244577  | 1.15467191  | 2.58495903 |
| 5.69094276  | 6.28061676  | 2.47308970 |
| 0.70104283  | 6.28061676  | 2.47308970 |
| 4.72644854  | 4.52631235  | 0.98044425 |
| -0.26345146 | 4.52631235  | 0.98044425 |
| 8.98416233  | 2.08401227  | 0.94984233 |
| 3.99426270  | 2.08401227  | 0.94984233 |
| 7.49692297  | 12.16127491 | 0.88189071 |
| 2.50702286  | 12.16127491 | 0.88189071 |
| 8.92881203  | 7.14167833  | 0.77916235 |
| 3.93891239  | 7.14167833  | 0.77916235 |
| 8.23179626  | 9.65808487  | 0.74752367 |
| 3.24189639  | 9.65808487  | 0.74752367 |
| 6.50168800  | 2.71004343  | 0.73384589 |
| 1.51178777  | 2.71004343  | 0.73384589 |
| 5.78449345  | 0.24636792  | 0.66762453 |
| 0.79459333  | 0.24636792  | 0.66762453 |
| 6.40908241  | 7.83185196  | 0.60482943 |
| 1.41918242  | 7.83185196  | 0.60482943 |

|            |             |            |
|------------|-------------|------------|
| 7.18588972 | 5.31081581  | 0.60368013 |
| 2.19598985 | 5.31081581  | 0.60368013 |
| 5.68450737 | 10.28863907 | 0.50651002 |
| 0.69460732 | 10.28863907 | 0.50651002 |

# TS for CH<sub>3</sub>+H->CH<sub>4</sub>(g)

1.000000000000

|             |             |             |
|-------------|-------------|-------------|
| 9.97980000  | 0.00000000  | 0.00000000  |
| -0.76395804 | 12.66177393 | 0.00000000  |
| 0.00000004  | 0.00000004  | 19.64040000 |

|   |    |   |    |
|---|----|---|----|
| H | C  | O | Fe |
| 4 | 41 | 4 | 80 |

Cart

|             |             |            |
|-------------|-------------|------------|
| 6.77566996  | 6.41752578  | 9.15452829 |
| 8.46117930  | 6.99528932  | 9.49921312 |
| 6.94915547  | 8.39918185  | 8.12760125 |
| 7.04380185  | 8.02346432  | 9.86887007 |
| 7.45384118  | 7.28015252  | 9.17264934 |
| 4.61895784  | 2.60118127  | 8.21458216 |
| 9.59969084  | 2.66023385  | 8.23646882 |
| 4.15972242  | 9.34856872  | 7.40636758 |
| 1.75761491  | 7.57361513  | 8.40306820 |
| 0.99194384  | 11.29599132 | 8.45970545 |
| 9.16750563  | 9.28567407  | 7.33468278 |
| 2.20149672  | 4.26737046  | 7.19590095 |
| 7.18925285  | 4.27697402  | 7.18023993 |
| 3.46101793  | 11.98600480 | 7.15865656 |
| 8.37620432  | 11.92646284 | 7.21716747 |
| -0.33144546 | 6.78487416  | 6.30002085 |
| 4.64570477  | 6.79187551  | 6.34144100 |
| 1.73036675  | 1.61995294  | 6.18532667 |
| 6.73359467  | 1.65513773  | 6.15492036 |
| 2.16410166  | 8.29351841  | 5.57227272 |
| 7.15100349  | 8.28198066  | 5.58439702 |
| 9.20254894  | 3.13945281  | 5.30291326 |
| 4.20321032  | 3.13783314  | 5.29405588 |
| 4.67219354  | 10.82091196 | 4.26948693 |
| -0.32551139 | 10.79270322 | 4.26540817 |
| 6.72112065  | 5.69639638  | 4.01822393 |
| 1.73545161  | 5.69826155  | 4.01099018 |
| 7.18454275  | 12.34801132 | 3.63733376 |
| 2.18206273  | 12.34891927 | 3.64233452 |
| 9.22696076  | 7.20207577  | 3.33108563 |

|             |             |            |
|-------------|-------------|------------|
| 4.23419348  | 7.19873188  | 3.33295895 |
| 5.47292232  | 2.23055553  | 2.34193015 |
| 0.48302215  | 2.23055553  | 2.34193015 |
| 6.73540354  | 9.72874641  | 2.00704742 |
| 1.74550355  | 9.72874641  | 2.00704742 |
| 7.98876715  | 3.77819967  | 1.47019899 |
| 2.99886727  | 3.77819967  | 1.47019899 |
| 9.21347809  | 11.29064846 | 1.28800344 |
| 4.22357798  | 11.29064846 | 1.28800344 |
| 5.52626467  | 6.13002825  | 0.45987183 |
| 0.53636485  | 6.13002825  | 0.45987183 |
| 7.45328903  | 1.12937152  | 0.40848067 |
| 2.46338916  | 1.12937152  | 0.40848067 |
| 4.75647831  | 8.73880577  | 0.18583304 |
| -0.23342146 | 8.73880577  | 0.18583304 |
| 1.20945158  | 11.38525046 | 9.62829476 |
| 4.76546922  | 2.42318053  | 9.38798826 |
| 9.72872518  | 2.51250925  | 9.41482675 |
| 1.58073309  | 7.33322258  | 9.56042943 |
| 2.53689794  | 10.33232756 | 7.21579162 |
| -0.01756450 | 10.93733120 | 6.99019618 |
| 3.17426666  | 7.82466431  | 7.13055288 |
| 8.11958503  | 7.76708567  | 7.19311318 |
| 0.67190352  | 12.41046664 | 4.91658151 |
| 7.49891779  | 0.10153063  | 7.02627905 |
| 3.87584747  | 5.17491521  | 6.98324927 |
| 8.86275874  | 5.18043655  | 6.96309997 |
| 3.20692306  | 2.72513469  | 6.91945839 |
| 8.20694837  | 2.74120219  | 6.92251862 |
| 0.70677422  | 8.31325162  | 6.92817149 |
| 5.64692122  | 8.40535610  | 6.86392664 |
| 5.01094286  | 10.94838809 | 6.85408174 |
| 7.49435271  | 10.24531630 | 7.10394535 |
| 1.38641797  | 5.90331506  | 6.78208909 |
| 6.37662468  | 5.89451321  | 6.67711669 |
| 0.70151690  | 3.27524063  | 6.73678629 |
| 5.68556765  | 3.29474884  | 6.73337880 |
| -0.00703827 | 0.87718998  | 6.70565639 |
| 5.01562103  | 0.91409651  | 6.68426790 |
| 3.23678190  | 11.77803313 | 5.17545708 |
| 8.22683882  | 11.76017795 | 5.19112236 |
| 8.88404954  | 9.22782604  | 5.14533855 |
| 3.87636441  | 9.25509030  | 5.10843833 |
| 7.51143435  | 4.22281146  | 5.02364105 |

|             |             |            |
|-------------|-------------|------------|
| 2.51612873  | 4.23337454  | 5.04040162 |
| 8.19628836  | 6.76960891  | 4.93242957 |
| 3.20738265  | 6.76067917  | 4.92683629 |
| 5.67193638  | 12.43037064 | 4.88229985 |
| 2.53197729  | 0.10393073  | 7.08434160 |
| 3.22207750  | 1.47079863  | 4.84543604 |
| 8.22460151  | 1.48067602  | 4.84186627 |
| 1.39799666  | 9.92054637  | 4.86292716 |
| 6.39209479  | 9.89792314  | 4.78982504 |
| 5.00384702  | 4.84784228  | 4.70769544 |
| 0.02600007  | 4.85247776  | 4.72935063 |
| 0.72217026  | 7.28683234  | 4.69742156 |
| 5.70339992  | 7.29689098  | 4.69256042 |
| 5.74539280  | 2.19502793  | 4.51058436 |
| 0.75861197  | 2.18426111  | 4.51599184 |
| 8.92724419  | 3.16928101  | 3.13275409 |
| 3.93734455  | 3.16928101  | 3.13275409 |
| 9.65447807  | 0.51179242  | 2.92767382 |
| 4.66457796  | 0.51179242  | 2.92767382 |
| 8.19081593  | 10.75315189 | 2.92137337 |
| 3.20091629  | 10.75315189 | 2.92137337 |
| 7.52427816  | 8.16568470  | 2.89047265 |
| 2.53437829  | 8.16568470  | 2.89047265 |
| 6.46140337  | 3.88992119  | 2.81003308 |
| 1.47150326  | 3.88992119  | 2.81003308 |
| 8.23615360  | 5.59719324  | 2.75910425 |
| 3.24625349  | 5.59719324  | 2.75910425 |
| 5.72548342  | 11.29866314 | 2.69921899 |
| 0.73558354  | 11.29866314 | 2.69921899 |
| 5.02271366  | 8.84247589  | 2.64073300 |
| 0.03281343  | 8.84247589  | 2.64073300 |
| 7.16234589  | 1.15467191  | 2.58495903 |
| 2.17244577  | 1.15467191  | 2.58495903 |
| 5.69094276  | 6.28061676  | 2.47308970 |
| 0.70104283  | 6.28061676  | 2.47308970 |
| 4.72644854  | 4.52631235  | 0.98044425 |
| -0.26345146 | 4.52631235  | 0.98044425 |
| 8.98416233  | 2.08401227  | 0.94984233 |
| 3.99426270  | 2.08401227  | 0.94984233 |
| 7.49692297  | 12.16127491 | 0.88189071 |
| 2.50702286  | 12.16127491 | 0.88189071 |
| 8.92881203  | 7.14167833  | 0.77916235 |
| 3.93891239  | 7.14167833  | 0.77916235 |
| 8.23179626  | 9.65808487  | 0.74752367 |



|            |             |            |
|------------|-------------|------------|
| 3.24189639 | 9.65808487  | 0.74752367 |
| 6.50168800 | 2.71004343  | 0.73384589 |
| 1.51178777 | 2.71004343  | 0.73384589 |
| 5.78449345 | 0.24636792  | 0.66762453 |
| 0.79459333 | 0.24636792  | 0.66762453 |
| 6.40908241 | 7.83185196  | 0.60482943 |
| 1.41918242 | 7.83185196  | 0.60482943 |
| 7.18588972 | 5.31081581  | 0.60368013 |
| 2.19598985 | 5.31081581  | 0.60368013 |
| 5.68450737 | 10.28863907 | 0.50651002 |
| 0.69460732 | 10.28863907 | 0.50651002 |

# H+CH<sub>4</sub>(g)

1.000000000000

|             |             |             |    |
|-------------|-------------|-------------|----|
| 9.97980000  | 0.00000000  | 0.00000000  |    |
| -0.76395804 | 12.66177393 | 0.00000000  |    |
| 0.00000004  | 0.00000004  | 19.64040000 |    |
| H           | C           | O           | Fe |
| 5           | 41          | 4           | 80 |

Cart

|             |             |             |
|-------------|-------------|-------------|
| 4.58716098  | 5.68963881  | 14.80811165 |
| 5.95447946  | 6.37191510  | 15.74222659 |
| 1.24241092  | 11.32171557 | 7.98905213  |
| 5.43374630  | 7.15063468  | 14.21690404 |
| 4.39403403  | 7.24716066  | 15.67140776 |
| 5.09204768  | 6.61470652  | 15.10970557 |
| 4.62970330  | 2.64418950  | 8.22643154  |
| 9.60645803  | 2.67077325  | 8.24186313  |
| 4.19012007  | 9.31649872  | 7.38196551  |
| 1.76574669  | 7.57139676  | 8.41500455  |
| 6.76010122  | 7.61012810  | 8.42643410  |
| 9.17214501  | 9.30112804  | 7.38365504  |
| 2.19600002  | 4.26495275  | 7.19606382  |
| 7.18626688  | 4.27362304  | 7.19714860  |
| 3.44917722  | 11.96826818 | 7.17337159  |
| 8.38505876  | 11.93748762 | 7.21559797  |
| -0.34044372 | 6.78129369  | 6.30988626  |
| 4.64778014  | 6.78772918  | 6.31587772  |
| 1.73608093  | 1.61528487  | 6.18488965  |
| 6.72922190  | 1.64982531  | 6.15860400  |
| 2.16521477  | 8.29142078  | 5.59124960  |
| 7.15583429  | 8.29722219  | 5.59581772  |
| 9.19794143  | 3.13854982  | 5.30715512  |

|             |             |            |
|-------------|-------------|------------|
| 4.20409819  | 3.13753651  | 5.29881453 |
| 4.66823046  | 10.81901483 | 4.26913263 |
| -0.32307852 | 10.81554276 | 4.26331924 |
| 6.72046293  | 5.69817744  | 4.01488243 |
| 1.73068204  | 5.69649157  | 4.01240168 |
| 7.18121301  | 12.34948531 | 3.63915970 |
| 2.18445846  | 12.34825122 | 3.63988355 |
| 9.22670446  | 7.20177904  | 3.33650535 |
| 4.23702370  | 7.20022065  | 3.33883766 |
| 5.47292232  | 2.23055553  | 2.34193015 |
| 0.48302215  | 2.23055553  | 2.34193015 |
| 6.73540354  | 9.72874641  | 2.00704742 |
| 1.74550355  | 9.72874641  | 2.00704742 |
| 7.98876715  | 3.77819967  | 1.47019899 |
| 2.99886727  | 3.77819967  | 1.47019899 |
| 9.21347809  | 11.29064846 | 1.28800344 |
| 4.22357798  | 11.29064846 | 1.28800344 |
| 5.52626467  | 6.13002825  | 0.45987183 |
| 0.53636485  | 6.13002825  | 0.45987183 |
| 7.45328903  | 1.12937152  | 0.40848067 |
| 2.46338916  | 1.12937152  | 0.40848067 |
| 4.75647831  | 8.73880577  | 0.18583304 |
| -0.23342146 | 8.73880577  | 0.18583304 |
| 6.59495382  | 7.37184391  | 9.58113971 |
| 4.76102594  | 2.48443732  | 9.40250450 |
| 9.73069049  | 2.52936139  | 9.42054021 |
| 1.59034026  | 7.31774470  | 9.56591110 |
| 2.53381566  | 10.29895452 | 7.19378567 |
| -0.01782951 | 10.93486139 | 6.93846872 |
| 3.16903510  | 7.80725803  | 7.13466687 |
| 8.16051463  | 7.79228972  | 7.13209893 |
| 0.67513268  | 12.41902977 | 4.90506316 |
| 7.49937104  | 0.10246337  | 7.02664216 |
| 3.86438917  | 5.17711342  | 6.98387427 |
| 8.85825378  | 5.17366480  | 6.98666032 |
| 3.20991502  | 2.72840006  | 6.92364332 |
| 8.20544117  | 2.73903986  | 6.92604043 |
| 0.70203787  | 8.32808349  | 6.94694544 |
| 5.69542377  | 8.34195410  | 6.94910373 |
| 5.00722203  | 10.93279741 | 6.85325861 |
| 7.50357531  | 10.25254924 | 7.11220471 |
| 1.37463570  | 5.90048155  | 6.78348149 |
| 6.36108413  | 5.90315604  | 6.77325305 |
| 0.70044772  | 3.27435181  | 6.73983154 |

|             |             |            |
|-------------|-------------|------------|
| 5.68622477  | 3.29324159  | 6.73331465 |
| -0.00040642 | 0.87835687  | 6.70897439 |
| 5.00524882  | 0.90226571  | 6.68753315 |
| 3.23544409  | 11.77507503 | 5.17617980 |
| 8.22846350  | 11.76935552 | 5.18802811 |
| 8.88236339  | 9.23993680  | 5.08979070 |
| 3.88070143  | 9.24266581  | 5.09176135 |
| 7.50550051  | 4.22864550  | 5.03473392 |
| 2.51364654  | 4.22847229  | 5.03765390 |
| 8.19036283  | 6.76155170  | 4.91810174 |
| 3.20229184  | 6.75916201  | 4.92323021 |
| 5.66955750  | 12.43263234 | 4.88541979 |
| 2.51649725  | 0.08613020  | 7.07226250 |
| 3.22479553  | 1.47370341  | 4.84569159 |
| 8.22111823  | 1.48377818  | 4.84161227 |
| 1.40008830  | 9.90556409  | 4.83901500 |
| 6.38725614  | 9.89807842  | 4.80809770 |
| 5.00996737  | 4.85159287  | 4.72609173 |
| 0.02355475  | 4.85099843  | 4.73503787 |
| 0.71914255  | 7.29004519  | 4.70482692 |
| 5.70734242  | 7.29472042  | 4.70721717 |
| 5.74464712  | 2.19397853  | 4.51157213 |
| 0.75753038  | 2.18713609  | 4.51828699 |
| 8.92724419  | 3.16928101  | 3.13275409 |
| 3.93734455  | 3.16928101  | 3.13275409 |
| 9.65447807  | 0.51179242  | 2.92767382 |
| 4.66457796  | 0.51179242  | 2.92767382 |
| 8.19081593  | 10.75315189 | 2.92137337 |
| 3.20091629  | 10.75315189 | 2.92137337 |
| 7.52427816  | 8.16568470  | 2.89047265 |
| 2.53437829  | 8.16568470  | 2.89047265 |
| 6.46140337  | 3.88992119  | 2.81003308 |
| 1.47150326  | 3.88992119  | 2.81003308 |
| 8.23615360  | 5.59719324  | 2.75910425 |
| 3.24625349  | 5.59719324  | 2.75910425 |
| 5.72548342  | 11.29866314 | 2.69921899 |
| 0.73558354  | 11.29866314 | 2.69921899 |
| 5.02271366  | 8.84247589  | 2.64073300 |
| 0.03281343  | 8.84247589  | 2.64073300 |
| 7.16234589  | 1.15467191  | 2.58495903 |
| 2.17244577  | 1.15467191  | 2.58495903 |
| 5.69094276  | 6.28061676  | 2.47308970 |
| 0.70104283  | 6.28061676  | 2.47308970 |
| 4.72644854  | 4.52631235  | 0.98044425 |

|             |             |            |
|-------------|-------------|------------|
| -0.26345146 | 4.52631235  | 0.98044425 |
| 8.98416233  | 2.08401227  | 0.94984233 |
| 3.99426270  | 2.08401227  | 0.94984233 |
| 7.49692297  | 12.16127491 | 0.88189071 |
| 2.50702286  | 12.16127491 | 0.88189071 |
| 8.92881203  | 7.14167833  | 0.77916235 |
| 3.93891239  | 7.14167833  | 0.77916235 |
| 8.23179626  | 9.65808487  | 0.74752367 |
| 3.24189639  | 9.65808487  | 0.74752367 |
| 6.50168800  | 2.71004343  | 0.73384589 |
| 1.51178777  | 2.71004343  | 0.73384589 |
| 5.78449345  | 0.24636792  | 0.66762453 |
| 0.79459333  | 0.24636792  | 0.66762453 |
| 6.40908241  | 7.83185196  | 0.60482943 |
| 1.41918242  | 7.83185196  | 0.60482943 |
| 7.18588972  | 5.31081581  | 0.60368013 |
| 2.19598985  | 5.31081581  | 0.60368013 |
| 5.68450737  | 10.28863907 | 0.50651002 |
| 0.69460732  | 10.28863907 | 0.50651002 |

# O

1.000000000000

|             |             |             |    |
|-------------|-------------|-------------|----|
| 9.97980000  | 0.00000000  | 0.00000000  |    |
| -0.76395804 | 12.66177393 | 0.00000000  |    |
| 0.00000004  | 0.00000004  | 19.64040000 |    |
| H           | C           | O           | Fe |
| 1           | 40          | 5           | 80 |

Cart

|             |             |            |
|-------------|-------------|------------|
| 1.21734763  | 11.29005580 | 7.96713522 |
| 4.63159187  | 2.64672341  | 8.22661270 |
| 9.61926587  | 2.62867445  | 8.22574919 |
| 4.15829256  | 9.29758898  | 7.38439699 |
| 1.82396978  | 7.41792270  | 8.40604949 |
| 6.97468787  | 7.34358915  | 8.46688077 |
| 9.15446840  | 9.29252643  | 7.38775510 |
| 2.20060726  | 4.26319538  | 7.19529134 |
| 7.18677267  | 4.24998709  | 7.18748106 |
| 3.41401103  | 11.96235523 | 7.18439583 |
| 8.50998507  | 11.97547730 | 7.13950683 |
| -0.33461643 | 6.75688746  | 6.29006525 |
| 4.65329300  | 6.75380574  | 6.30426378 |
| 1.74913379  | 1.63156761  | 6.16724910 |
| 6.73257863  | 1.59232050  | 6.17572726 |

|             |             |            |
|-------------|-------------|------------|
| 2.16906799  | 8.28755724  | 5.59216499 |
| 7.14995250  | 8.26812970  | 5.58486293 |
| 9.19699365  | 3.12917465  | 5.29706057 |
| 4.20727440  | 3.13214201  | 5.29549962 |
| 4.66879859  | 10.78314114 | 4.24750961 |
| -0.32245953 | 10.78681955 | 4.26456255 |
| 6.72028092  | 5.68979288  | 4.01318314 |
| 1.73057960  | 5.69564520  | 4.01422655 |
| 7.17630335  | 12.34827377 | 3.64430736 |
| 2.19438585  | 12.34722921 | 3.63838887 |
| 9.22691909  | 7.20260757  | 3.33117590 |
| 4.23518041  | 7.20074926  | 3.32989564 |
| 5.47292232  | 2.23055553  | 2.34193015 |
| 0.48302215  | 2.23055553  | 2.34193015 |
| 6.73540354  | 9.72874641  | 2.00704742 |
| 1.74550355  | 9.72874641  | 2.00704742 |
| 7.98876715  | 3.77819967  | 1.47019899 |
| 2.99886727  | 3.77819967  | 1.47019899 |
| 9.21347809  | 11.29064846 | 1.28800344 |
| 4.22357798  | 11.29064846 | 1.28800344 |
| 5.52626467  | 6.13002825  | 0.45987183 |
| 0.53636485  | 6.13002825  | 0.45987183 |
| 7.45328903  | 1.12937152  | 0.40848067 |
| 2.46338916  | 1.12937152  | 0.40848067 |
| 4.75647831  | 8.73880577  | 0.18583304 |
| -0.23342146 | 8.73880577  | 0.18583304 |
| 6.55909287  | 7.13537611  | 9.55985035 |
| 4.75999007  | 2.48954591  | 9.40280429 |
| 9.76690334  | 2.45678161  | 9.39814069 |
| 1.57773320  | 7.16566934  | 9.54567946 |
| 6.23529398  | 11.33500415 | 8.24554254 |
| 2.48935623  | 10.27242991 | 7.16631698 |
| 0.01960728  | 10.88824004 | 6.87517133 |
| 3.16979092  | 7.77095767  | 7.13429647 |
| 8.15895758  | 7.76678801  | 7.14269378 |
| 0.68213267  | 12.41683160 | 4.88591599 |
| 7.54338378  | 0.10225856  | 7.12468478 |
| 3.87261556  | 5.16094886  | 6.99782294 |
| 8.85070888  | 5.17568828  | 7.00712551 |
| 3.21452819  | 2.72607228  | 6.91996355 |
| 8.20226806  | 2.71120799  | 6.92454307 |
| 0.70275334  | 8.31111049  | 6.96298989 |
| 5.66657895  | 8.30797930  | 6.92366581 |
| 4.93956615  | 10.93424844 | 7.02928840 |

|            |             |            |
|------------|-------------|------------|
| 7.54038993 | 10.32354755 | 7.28160412 |
| 1.38007888 | 5.89808851  | 6.79472503 |
| 6.37589171 | 5.89020108  | 6.78273012 |
| 0.69833339 | 3.28915726  | 6.73443500 |
| 5.69073777 | 3.27282402  | 6.72784695 |
| 0.01880697 | 0.91964107  | 6.66440128 |
| 4.98587218 | 0.90253391  | 6.68103510 |
| 3.25029523 | 11.74996770 | 5.18786039 |
| 8.23238350 | 11.75566857 | 5.18508874 |
| 8.86045534 | 9.23880283  | 5.13956692 |
| 3.90238492 | 9.24821080  | 5.15031803 |
| 7.50980668 | 4.22227147  | 5.03760415 |
| 2.51955847 | 4.22992322  | 5.03574886 |
| 8.20032751 | 6.75889391  | 4.91244632 |
| 3.20819464 | 6.76421115  | 4.91319646 |
| 5.67177893 | 12.39304525 | 4.92862329 |
| 2.50911431 | 0.08843011  | 7.05535300 |
| 3.23868981 | 1.46422807  | 4.84516751 |
| 8.21644670 | 1.46421985  | 4.84277191 |
| 1.39991675 | 9.88668745  | 4.81899587 |
| 6.38969032 | 9.90571202  | 4.87806291 |
| 5.01187815 | 4.85223831  | 4.73473307 |
| 0.02021172 | 4.85456949  | 4.74270311 |
| 0.72591642 | 7.29462289  | 4.70451954 |
| 5.71413258 | 7.28230916  | 4.69693204 |
| 5.75474073 | 2.18155233  | 4.51286059 |
| 0.76433243 | 2.19197570  | 4.51037063 |
| 8.92724419 | 3.16928101  | 3.13275409 |
| 3.93734455 | 3.16928101  | 3.13275409 |
| 9.65447807 | 0.51179242  | 2.92767382 |
| 4.66457796 | 0.51179242  | 2.92767382 |
| 8.19081593 | 10.75315189 | 2.92137337 |
| 3.20091629 | 10.75315189 | 2.92137337 |
| 7.52427816 | 8.16568470  | 2.89047265 |
| 2.53437829 | 8.16568470  | 2.89047265 |
| 6.46140337 | 3.88992119  | 2.81003308 |
| 1.47150326 | 3.88992119  | 2.81003308 |
| 8.23615360 | 5.59719324  | 2.75910425 |
| 3.24625349 | 5.59719324  | 2.75910425 |
| 5.72548342 | 11.29866314 | 2.69921899 |
| 0.73558354 | 11.29866314 | 2.69921899 |
| 5.02271366 | 8.84247589  | 2.64073300 |
| 0.03281343 | 8.84247589  | 2.64073300 |
| 7.16234589 | 1.15467191  | 2.58495903 |

|             |             |            |
|-------------|-------------|------------|
| 2.17244577  | 1.15467191  | 2.58495903 |
| 5.69094276  | 6.28061676  | 2.47308970 |
| 0.70104283  | 6.28061676  | 2.47308970 |
| 4.72644854  | 4.52631235  | 0.98044425 |
| -0.26345146 | 4.52631235  | 0.98044425 |
| 8.98416233  | 2.08401227  | 0.94984233 |
| 3.99426270  | 2.08401227  | 0.94984233 |
| 7.49692297  | 12.16127491 | 0.88189071 |
| 2.50702286  | 12.16127491 | 0.88189071 |
| 8.92881203  | 7.14167833  | 0.77916235 |
| 3.93891239  | 7.14167833  | 0.77916235 |
| 8.23179626  | 9.65808487  | 0.74752367 |
| 3.24189639  | 9.65808487  | 0.74752367 |
| 6.50168800  | 2.71004343  | 0.73384589 |
| 1.51178777  | 2.71004343  | 0.73384589 |
| 5.78449345  | 0.24636792  | 0.66762453 |
| 0.79459333  | 0.24636792  | 0.66762453 |
| 6.40908241  | 7.83185196  | 0.60482943 |
| 1.41918242  | 7.83185196  | 0.60482943 |
| 7.18588972  | 5.31081581  | 0.60368013 |
| 2.19598985  | 5.31081581  | 0.60368013 |
| 5.68450737  | 10.28863907 | 0.50651002 |
| 0.69460732  | 10.28863907 | 0.50651002 |

# O+H

1.000000000000

|             |             |             |    |
|-------------|-------------|-------------|----|
| 9.97980000  | 0.00000000  | 0.00000000  |    |
| -0.76395804 | 12.66177393 | 0.00000000  |    |
| 0.00000004  | 0.00000004  | 19.64040000 |    |
| H           | C           | O           | Fe |
| 2           | 40          | 5           | 80 |

Cart

|            |             |            |
|------------|-------------|------------|
| 8.55677305 | 1.38266047  | 7.90597471 |
| 1.20795803 | 11.31655782 | 7.95879589 |
| 4.18387327 | 9.31385836  | 7.36914001 |
| 4.63441350 | 2.66178055  | 8.22543120 |
| 1.78640475 | 7.55869049  | 8.41929832 |
| 9.69447570 | 3.39787528  | 8.30365335 |
| 6.73509518 | 7.53801604  | 8.39621465 |
| 9.15633038 | 9.30821240  | 7.39150260 |
| 2.22910364 | 4.30124835  | 7.16657955 |
| 7.16496456 | 4.28627176  | 7.16299154 |
| 3.40995947 | 11.97584652 | 7.18716538 |

|             |             |            |
|-------------|-------------|------------|
| 8.51311832  | 11.95361956 | 7.09524216 |
| -0.34705530 | 6.77674695  | 6.31369224 |
| 4.64803751  | 6.79343287  | 6.29167979 |
| 1.72884176  | 1.65352204  | 6.18705831 |
| 6.71694649  | 1.61201888  | 6.15745142 |
| 2.16494610  | 8.29450371  | 5.58998233 |
| 7.14997517  | 8.28113841  | 5.58327740 |
| 9.20394645  | 3.12653972  | 5.30440625 |
| 4.20295412  | 3.13727867  | 5.29385923 |
| 4.66701401  | 10.80700100 | 4.25123662 |
| -0.32056704 | 10.80494662 | 4.26859098 |
| 6.72294799  | 5.68597772  | 4.01502591 |
| 1.72910243  | 5.70167874  | 4.01478517 |
| 7.17154928  | 12.35403654 | 3.63963813 |
| 2.18974151  | 12.34964257 | 3.64089494 |
| 9.22441080  | 7.20026853  | 3.33318180 |
| 4.23430177  | 7.19941945  | 3.32200147 |
| 5.47292217  | 2.23055554  | 2.34193027 |
| 0.48302217  | 2.23055554  | 2.34193027 |
| 6.73540357  | 9.72874639  | 2.00704745 |
| 1.74550357  | 9.72874639  | 2.00704745 |
| 7.98876734  | 3.77819959  | 1.47019894 |
| 2.99886734  | 3.77819959  | 1.47019894 |
| 9.21347812  | 11.29064837 | 1.28800348 |
| 4.22357812  | 11.29064837 | 1.28800348 |
| 5.52626486  | 6.13002817  | 0.45987182 |
| 0.53636486  | 6.13002817  | 0.45987182 |
| 7.45328915  | 1.12937154  | 0.40848067 |
| 2.46338915  | 1.12937154  | 0.40848067 |
| 4.75647854  | 8.73880611  | 0.18583303 |
| -0.23342146 | 8.73880611  | 0.18583303 |
| 6.24441922  | 11.36807974 | 8.23806617 |
| 6.55700171  | 7.26497731  | 9.54319941 |
| 4.75386681  | 2.50019968  | 9.40195616 |
| 1.59114516  | 7.32344907  | 9.57193158 |
| 9.63949494  | 3.52251287  | 9.48547001 |
| 2.50214972  | 10.28725710 | 7.17569130 |
| 0.02588014  | 10.89178151 | 6.85488319 |
| 3.16374315  | 7.79993209  | 7.13204415 |
| 8.15284331  | 7.79704860  | 7.12873471 |
| 0.67847767  | 12.43238591 | 4.88759302 |
| 7.57574372  | 0.16422425  | 7.15780460 |
| 3.88544337  | 5.18901966  | 6.98974699 |
| 8.85059288  | 5.17657739  | 7.00712515 |



|            |             |            |
|------------|-------------|------------|
| 3.20942829 | 2.73899210  | 6.92346952 |
| 8.20562663 | 2.74136375  | 6.97589629 |
| 0.69636416 | 8.33327406  | 6.95388501 |
| 5.68024759 | 8.31323258  | 6.92897871 |
| 4.95059634 | 10.96172771 | 7.02570950 |
| 7.53165946 | 10.32933868 | 7.28106224 |
| 1.38793354 | 5.93399138  | 6.77043127 |
| 6.35972474 | 5.91545845  | 6.76312902 |
| 0.69931657 | 3.36205022  | 6.73378876 |
| 5.67953456 | 3.28593740  | 6.72019496 |
| 0.00436885 | 0.93665250  | 6.69616932 |
| 4.98108207 | 0.91607997  | 6.67966916 |
| 3.24549637 | 11.76527513 | 5.18945654 |
| 8.22699367 | 11.76833795 | 5.17604373 |
| 8.85821545 | 9.24716919  | 5.11364077 |
| 3.89299604 | 9.26693988  | 5.13902314 |
| 7.50928892 | 4.20110704  | 5.05415582 |
| 2.51516130 | 4.23314405  | 5.03440994 |
| 8.19249388 | 6.75396875  | 4.91892975 |
| 3.20235048 | 6.77496628  | 4.91007471 |
| 5.66884992 | 12.40935309 | 4.93137725 |
| 2.50328473 | 0.10684010  | 7.05694205 |
| 3.22524296 | 1.47539331  | 4.84894907 |
| 8.20960936 | 1.48466571  | 4.85571357 |
| 1.39812793 | 9.89612998  | 4.81560003 |
| 6.38412583 | 9.91369796  | 4.86465568 |
| 5.01356204 | 4.85365811  | 4.72959029 |
| 0.01850271 | 4.85764980  | 4.73082722 |
| 0.71496627 | 7.30088840  | 4.70252957 |
| 5.71185161 | 7.29447468  | 4.68786317 |
| 5.74840756 | 2.18905073  | 4.50892286 |
| 0.75311127 | 2.19035852  | 4.52399277 |
| 8.92724451 | 3.16928099  | 3.13275412 |
| 3.93734451 | 3.16928099  | 3.13275412 |
| 9.65447774 | 0.51179240  | 2.92767386 |
| 4.66457774 | 0.51179240  | 2.92767386 |
| 8.19081638 | 10.75315178 | 2.92137328 |
| 3.20091637 | 10.75315178 | 2.92137328 |
| 7.52427827 | 8.16568472  | 2.89047266 |
| 2.53437827 | 8.16568472  | 2.89047266 |
| 6.46140326 | 3.88992115  | 2.81003309 |
| 1.47150326 | 3.88992115  | 2.81003309 |
| 8.23615357 | 5.59719332  | 2.75910422 |
| 3.24625357 | 5.59719332  | 2.75910422 |

|             |             |            |
|-------------|-------------|------------|
| 5.72548353  | 11.29866287 | 2.69921895 |
| 0.73558353  | 11.29866287 | 2.69921895 |
| 5.02271343  | 8.84247544  | 2.64073298 |
| 0.03281343  | 8.84247544  | 2.64073298 |
| 7.16234573  | 1.15467185  | 2.58495906 |
| 2.17244573  | 1.15467185  | 2.58495906 |
| 5.69094282  | 6.28061655  | 2.47308962 |
| 0.70104282  | 6.28061655  | 2.47308962 |
| 4.72644856  | 4.52631212  | 0.98044427 |
| -0.26345145 | 4.52631212  | 0.98044427 |
| 8.98416265  | 2.08401219  | 0.94984236 |
| 3.99426265  | 2.08401219  | 0.94984236 |
| 7.49692293  | 12.16127468 | 0.88189072 |
| 2.50702293  | 12.16127468 | 0.88189072 |
| 8.92881242  | 7.14167817  | 0.77916237 |
| 3.93891242  | 7.14167817  | 0.77916237 |
| 8.23179647  | 9.65808525  | 0.74752367 |
| 3.24189647  | 9.65808525  | 0.74752367 |
| 6.50168782  | 2.71004334  | 0.73384591 |
| 1.51178782  | 2.71004334  | 0.73384591 |
| 5.78449336  | 0.24636792  | 0.66762456 |
| 0.79459336  | 0.24636792  | 0.66762456 |
| 6.40908241  | 7.83185195  | 0.60482946 |
| 1.41918241  | 7.83185195  | 0.60482946 |
| 7.18588982  | 5.31081574  | 0.60368013 |
| 2.19598981  | 5.31081574  | 0.60368013 |
| 5.68450729  | 10.28863881 | 0.50651002 |
| 0.69460729  | 10.28863881 | 0.50651002 |

# TS for O+H->OH

1.000000000000

|             |             |             |    |
|-------------|-------------|-------------|----|
| 9.97980000  | 0.00000000  | 0.00000000  |    |
| -0.76395804 | 12.66177393 | 0.00000000  |    |
| 0.00000004  | 0.00000004  | 19.64040000 |    |
| H           | C           | O           | Fe |
| 2           | 40          | 5           | 80 |

Cart

|            |             |            |
|------------|-------------|------------|
| 7.33080495 | 0.02323383  | 8.69223256 |
| 1.22583312 | 11.32889963 | 7.96444811 |
| 4.19135774 | 9.30458326  | 7.38001486 |
| 4.62237011 | 2.66002225  | 8.22759522 |
| 1.79798987 | 7.53439410  | 8.41935704 |
| 9.63280236 | 2.84987392  | 8.25942635 |

|             |             |            |
|-------------|-------------|------------|
| 6.74435463  | 7.56854490  | 8.40935046 |
| 9.16296307  | 9.32063938  | 7.38252108 |
| 2.20571300  | 4.28229694  | 7.19037115 |
| 7.18454502  | 4.27042780  | 7.18918964 |
| 3.42485802  | 11.97469866 | 7.18973821 |
| 8.48145526  | 12.00274110 | 7.16279538 |
| -0.34183240 | 6.78566196  | 6.31127466 |
| 4.65199276  | 6.78194296  | 6.29714053 |
| 1.74969042  | 1.64866191  | 6.16923031 |
| 6.74643059  | 1.60170658  | 6.18043202 |
| 2.16917106  | 8.29348724  | 5.59459691 |
| 7.15250460  | 8.28111618  | 5.58317593 |
| 9.19716235  | 3.12611197  | 5.29808894 |
| 4.21041902  | 3.13840708  | 5.29475608 |
| 4.66659797  | 10.79377434 | 4.24939471 |
| -0.32036537 | 10.80514366 | 4.27018973 |
| 6.72357397  | 5.69423546  | 4.01359708 |
| 1.73244213  | 5.70332859  | 4.01446772 |
| 7.17699310  | 12.34901290 | 3.64808377 |
| 2.19470502  | 12.34758335 | 3.64013765 |
| 9.22767394  | 7.20064883  | 3.33433095 |
| 4.23684296  | 7.20053504  | 3.32777474 |
| 5.47292217  | 2.23055554  | 2.34193027 |
| 0.48302217  | 2.23055554  | 2.34193027 |
| 6.73540357  | 9.72874639  | 2.00704745 |
| 1.74550357  | 9.72874639  | 2.00704745 |
| 7.98876734  | 3.77819959  | 1.47019894 |
| 2.99886734  | 3.77819959  | 1.47019894 |
| 9.21347812  | 11.29064837 | 1.28800348 |
| 4.22357812  | 11.29064837 | 1.28800348 |
| 5.52626486  | 6.13002817  | 0.45987182 |
| 0.53636486  | 6.13002817  | 0.45987182 |
| 7.45328915  | 1.12937154  | 0.40848067 |
| 2.46338915  | 1.12937154  | 0.40848067 |
| 4.75647854  | 8.73880611  | 0.18583303 |
| -0.23342146 | 8.73880611  | 0.18583303 |
| 6.21948000  | 11.35640402 | 8.34802161 |
| 6.57983831  | 7.30452933  | 9.56002508 |
| 4.74551882  | 2.49812401  | 9.40429808 |
| 1.58361239  | 7.29601980  | 9.56739095 |
| 9.70120482  | 2.76214270  | 9.44461049 |
| 2.51496828  | 10.29171491 | 7.18592756 |
| 0.01109545  | 10.92389188 | 6.88496503 |
| 3.17007320  | 7.79545396  | 7.13692016 |

|            |             |            |
|------------|-------------|------------|
| 8.15554233 | 7.80616089  | 7.13047053 |
| 0.68294510 | 12.42684590 | 4.88580389 |
| 7.53755566 | 0.11986887  | 7.12306751 |
| 3.87287629 | 5.18171472  | 6.99139066 |
| 8.85572546 | 5.18278840  | 6.99538140 |
| 3.21653506 | 2.74130586  | 6.91823160 |
| 8.20545125 | 2.73579989  | 6.93590692 |
| 0.70180252 | 8.33414788  | 6.95589040 |
| 5.68709504 | 8.30748443  | 6.93486064 |
| 4.96915296 | 10.95669441 | 7.00803711 |
| 7.53653466 | 10.34050542 | 7.31074640 |
| 1.37845805 | 5.91770406  | 6.79030976 |
| 6.36739271 | 5.90194346  | 6.77371039 |
| 0.69995249 | 3.31660892  | 6.72923985 |
| 5.69073995 | 3.28744045  | 6.72880703 |
| 0.01565681 | 0.93222210  | 6.65513245 |
| 5.00404684 | 0.90932534  | 6.68973894 |
| 3.24537525 | 11.76105219 | 5.18991327 |
| 8.23268648 | 11.75985870 | 5.18741619 |
| 8.86938900 | 9.24873660  | 5.12339096 |
| 3.89820680 | 9.26193100  | 5.14885230 |
| 7.51095936 | 4.22271525  | 5.04318670 |
| 2.51812688 | 4.23746896  | 5.03709423 |
| 8.19635984 | 6.76300069  | 4.91680936 |
| 3.20580371 | 6.77311604  | 4.91309981 |
| 5.65532978 | 12.40395400 | 4.90966746 |
| 2.51449499 | 0.10571231  | 7.05484334 |
| 3.23505123 | 1.47381208  | 4.84374757 |
| 8.22208629 | 1.45761834  | 4.85903719 |
| 1.40063093 | 9.89625611  | 4.82154289 |
| 6.38821406 | 9.91767741  | 4.88188443 |
| 5.01435747 | 4.85544153  | 4.73046474 |
| 0.02226352 | 4.85740115  | 4.73289922 |
| 0.72074370 | 7.29730517  | 4.70673250 |
| 5.71288485 | 7.29045656  | 4.69446402 |
| 5.75656594 | 2.18855396  | 4.51536190 |
| 0.76330879 | 2.19654524  | 4.50921899 |
| 8.92724451 | 3.16928099  | 3.13275412 |
| 3.93734451 | 3.16928099  | 3.13275412 |
| 9.65447774 | 0.51179240  | 2.92767386 |
| 4.66457774 | 0.51179240  | 2.92767386 |
| 8.19081638 | 10.75315178 | 2.92137328 |
| 3.20091637 | 10.75315178 | 2.92137328 |
| 7.52427827 | 8.16568472  | 2.89047266 |

|             |             |            |
|-------------|-------------|------------|
| 2.53437827  | 8.16568472  | 2.89047266 |
| 6.46140326  | 3.88992115  | 2.81003309 |
| 1.47150326  | 3.88992115  | 2.81003309 |
| 8.23615357  | 5.59719332  | 2.75910422 |
| 3.24625357  | 5.59719332  | 2.75910422 |
| 5.72548353  | 11.29866287 | 2.69921895 |
| 0.73558353  | 11.29866287 | 2.69921895 |
| 5.02271343  | 8.84247544  | 2.64073298 |
| 0.03281343  | 8.84247544  | 2.64073298 |
| 7.16234573  | 1.15467185  | 2.58495906 |
| 2.17244573  | 1.15467185  | 2.58495906 |
| 5.69094282  | 6.28061655  | 2.47308962 |
| 0.70104282  | 6.28061655  | 2.47308962 |
| 4.72644856  | 4.52631212  | 0.98044427 |
| -0.26345145 | 4.52631212  | 0.98044427 |
| 8.98416265  | 2.08401219  | 0.94984236 |
| 3.99426265  | 2.08401219  | 0.94984236 |
| 7.49692293  | 12.16127468 | 0.88189072 |
| 2.50702293  | 12.16127468 | 0.88189072 |
| 8.92881242  | 7.14167817  | 0.77916237 |
| 3.93891242  | 7.14167817  | 0.77916237 |
| 8.23179647  | 9.65808525  | 0.74752367 |
| 3.24189647  | 9.65808525  | 0.74752367 |
| 6.50168782  | 2.71004334  | 0.73384591 |
| 1.51178782  | 2.71004334  | 0.73384591 |
| 5.78449336  | 0.24636792  | 0.66762456 |
| 0.79459336  | 0.24636792  | 0.66762456 |
| 6.40908241  | 7.83185195  | 0.60482946 |
| 1.41918241  | 7.83185195  | 0.60482946 |
| 7.18588982  | 5.31081574  | 0.60368013 |
| 2.19598981  | 5.31081574  | 0.60368013 |
| 5.68450729  | 10.28863881 | 0.50651002 |
| 0.69460729  | 10.28863881 | 0.50651002 |

# OH

1.000000000000

|             |             |             |
|-------------|-------------|-------------|
| 9.97980000  | 0.00000000  | 0.00000000  |
| -0.76395804 | 12.66177393 | 0.00000000  |
| 0.00000004  | 0.00000004  | 19.64040000 |

| H | C  | O | Fe |
|---|----|---|----|
| 2 | 40 | 5 | 80 |

Cart

|            |             |            |
|------------|-------------|------------|
| 6.01359305 | 11.33014667 | 9.42361543 |
|------------|-------------|------------|

|             |             |            |
|-------------|-------------|------------|
| 1.22965600  | 11.29941472 | 7.97244131 |
| 4.18157844  | 9.29062880  | 7.38301479 |
| 4.63090479  | 2.59263959  | 8.21758364 |
| 1.79546059  | 7.52283122  | 8.41789260 |
| 9.60676741  | 2.60952361  | 8.22595624 |
| 6.74486714  | 7.56183172  | 8.40826246 |
| 9.16793358  | 9.30172661  | 7.39129261 |
| 2.20236006  | 4.26364236  | 7.20373534 |
| 7.19244651  | 4.25756793  | 7.20116961 |
| 3.42134392  | 11.97097437 | 7.18133064 |
| 8.47523224  | 11.97689521 | 7.13160910 |
| -0.34433279 | 6.77811975  | 6.30660203 |
| 4.64559458  | 6.77138161  | 6.30008089 |
| 1.74559687  | 1.62794938  | 6.16896908 |
| 6.73022736  | 1.60694448  | 6.15102698 |
| 2.16432256  | 8.28967329  | 5.59081247 |
| 7.14671801  | 8.28126697  | 5.58888958 |
| 9.20284995  | 3.13687087  | 5.29756693 |
| 4.20865182  | 3.13683399  | 5.30022435 |
| 4.67202396  | 10.80193110 | 4.25975383 |
| -0.32687615 | 10.80908121 | 4.27013585 |
| 6.72098923  | 5.69232448  | 4.01321115 |
| 1.73044748  | 5.69417751  | 4.01354662 |
| 7.17717989  | 12.34746952 | 3.64507235 |
| 2.19451022  | 12.34678121 | 3.64324718 |
| 9.22573444  | 7.19997497  | 3.33497379 |
| 4.23492580  | 7.20025996  | 3.33126266 |
| 5.47292217  | 2.23055554  | 2.34193027 |
| 0.48302217  | 2.23055554  | 2.34193027 |
| 6.73540357  | 9.72874639  | 2.00704745 |
| 1.74550357  | 9.72874639  | 2.00704745 |
| 7.98876734  | 3.77819959  | 1.47019894 |
| 2.99886734  | 3.77819959  | 1.47019894 |
| 9.21347812  | 11.29064837 | 1.28800348 |
| 4.22357812  | 11.29064837 | 1.28800348 |
| 5.52626486  | 6.13002817  | 0.45987182 |
| 0.53636486  | 6.13002817  | 0.45987182 |
| 7.45328915  | 1.12937154  | 0.40848067 |
| 2.46338915  | 1.12937154  | 0.40848067 |
| 4.75647854  | 8.73880611  | 0.18583303 |
| -0.23342146 | 8.73880611  | 0.18583303 |
| 6.23243911  | 11.35660099 | 8.47602200 |
| 6.58485942  | 7.29648694  | 9.56245069 |
| 4.79727417  | 2.39944667  | 9.38688849 |

|            |             |            |
|------------|-------------|------------|
| 1.58079872 | 7.27934945  | 9.56693718 |
| 9.76793839 | 2.43310752  | 9.39741582 |
| 2.51118751 | 10.28192657 | 7.17420808 |
| 0.01046737 | 10.90596096 | 6.88776497 |
| 3.16341588 | 7.78553157  | 7.13306860 |
| 8.15351628 | 7.79287103  | 7.13297251 |
| 0.67735473 | 12.42535699 | 4.88956937 |
| 7.51554953 | 0.14252364  | 7.15187309 |
| 3.86945030 | 5.16867355  | 6.98874798 |
| 8.85836545 | 5.17073206  | 6.98540720 |
| 3.21594715 | 2.72682832  | 6.92578982 |
| 8.20665963 | 2.72188407  | 6.92069124 |
| 0.70107455 | 8.31759907  | 6.95347020 |
| 5.68279874 | 8.29847917  | 6.93382050 |
| 4.96715507 | 10.93946939 | 6.98784169 |
| 7.53905628 | 10.31143432 | 7.29746355 |
| 1.36917987 | 5.89239382  | 6.78846146 |
| 6.36407582 | 5.88527417  | 6.77364861 |
| 0.70086216 | 3.28711258  | 6.73838115 |
| 5.69427481 | 3.27804363  | 6.73338999 |
| 0.01106156 | 0.91911087  | 6.67443255 |
| 4.98800066 | 0.90860166  | 6.67334130 |
| 3.24797162 | 11.75903084 | 5.18577973 |
| 8.21882709 | 11.75726790 | 5.19636204 |
| 8.87139783 | 9.24142195  | 5.11017470 |
| 3.89127528 | 9.24702916  | 5.12523881 |
| 7.50850466 | 4.22356750  | 5.03519207 |
| 2.51833097 | 4.22768806  | 5.03864350 |
| 8.19157753 | 6.76088944  | 4.91638767 |
| 3.20080422 | 6.76140439  | 4.91423660 |
| 5.67348450 | 12.41424340 | 4.92024775 |
| 2.51060239 | 0.08902257  | 7.05635606 |
| 3.23393409 | 1.47169820  | 4.84355459 |
| 8.22218178 | 1.47322400  | 4.83573695 |
| 1.39625970 | 9.89175726  | 4.81600989 |
| 6.38509817 | 9.90700138  | 4.86261088 |
| 5.01186438 | 4.85016391  | 4.73102309 |
| 0.02203630 | 4.85215495  | 4.72975232 |
| 0.71850924 | 7.29134075  | 4.70537899 |
| 5.70863480 | 7.28599939  | 4.69538252 |
| 5.75124822 | 2.19501129  | 4.50761879 |
| 0.76353311 | 2.19547592  | 4.51158920 |
| 8.92724451 | 3.16928099  | 3.13275412 |
| 3.93734451 | 3.16928099  | 3.13275412 |

|             |             |            |
|-------------|-------------|------------|
| 9.65447774  | 0.51179240  | 2.92767386 |
| 4.66457774  | 0.51179240  | 2.92767386 |
| 8.19081638  | 10.75315178 | 2.92137328 |
| 3.20091637  | 10.75315178 | 2.92137328 |
| 7.52427827  | 8.16568472  | 2.89047266 |
| 2.53437827  | 8.16568472  | 2.89047266 |
| 6.46140326  | 3.88992115  | 2.81003309 |
| 1.47150326  | 3.88992115  | 2.81003309 |
| 8.23615357  | 5.59719332  | 2.75910422 |
| 3.24625357  | 5.59719332  | 2.75910422 |
| 5.72548353  | 11.29866287 | 2.69921895 |
| 0.73558353  | 11.29866287 | 2.69921895 |
| 5.02271343  | 8.84247544  | 2.64073298 |
| 0.03281343  | 8.84247544  | 2.64073298 |
| 7.16234573  | 1.15467185  | 2.58495906 |
| 2.17244573  | 1.15467185  | 2.58495906 |
| 5.69094282  | 6.28061655  | 2.47308962 |
| 0.70104282  | 6.28061655  | 2.47308962 |
| 4.72644856  | 4.52631212  | 0.98044427 |
| -0.26345145 | 4.52631212  | 0.98044427 |
| 8.98416265  | 2.08401219  | 0.94984236 |
| 3.99426265  | 2.08401219  | 0.94984236 |
| 7.49692293  | 12.16127468 | 0.88189072 |
| 2.50702293  | 12.16127468 | 0.88189072 |
| 8.92881242  | 7.14167817  | 0.77916237 |
| 3.93891242  | 7.14167817  | 0.77916237 |
| 8.23179647  | 9.65808525  | 0.74752367 |
| 3.24189647  | 9.65808525  | 0.74752367 |
| 6.50168782  | 2.71004334  | 0.73384591 |
| 1.51178782  | 2.71004334  | 0.73384591 |
| 5.78449336  | 0.24636792  | 0.66762456 |
| 0.79459336  | 0.24636792  | 0.66762456 |
| 6.40908241  | 7.83185195  | 0.60482946 |
| 1.41918241  | 7.83185195  | 0.60482946 |
| 7.18588982  | 5.31081574  | 0.60368013 |
| 2.19598981  | 5.31081574  | 0.60368013 |
| 5.68450729  | 10.28863881 | 0.50651002 |
| 0.69460729  | 10.28863881 | 0.50651002 |

# O+CH<sub>v</sub>

1.000000000000

|             |             |            |
|-------------|-------------|------------|
| 9.97980000  | 0.00000000  | 0.00000000 |
| -0.76395804 | 12.66177393 | 0.00000000 |



|      | 0.00000004  | 0.00000004 | 19.64040000            |
|------|-------------|------------|------------------------|
|      | H           | C          | O Fe                   |
|      | 2           | 40         | 5 80                   |
| Cart |             |            |                        |
|      | 4.28174824  |            | 9.40059250 9.04998328  |
|      | 1.25875194  |            | 11.25386801 7.91706407 |
|      | 4.21251008  |            | 9.24741570 7.95984693  |
|      | 4.62863870  |            | 2.60400899 8.21909282  |
|      | 1.81368788  |            | 7.49168518 8.42721683  |
|      | 9.62293567  |            | 2.63471587 8.22044040  |
|      | 6.73134123  |            | 7.55976890 8.42042454  |
|      | 9.16564524  |            | 9.29843719 7.39546443  |
|      | 2.20630291  |            | 4.27407058 7.18888311  |
|      | 7.18510834  |            | 4.26161141 7.18777073  |
|      | 3.43704944  |            | 11.90306812 7.13330625 |
|      | 8.50662425  |            | 11.97442006 7.13564429 |
|      | -0.33826604 |            | 6.77548701 6.30779239  |
|      | 4.63755611  |            | 6.81354481 6.30383223  |
|      | 1.75345763  |            | 1.62212429 6.18000879  |
|      | 6.73333221  |            | 1.59011744 6.17621500  |
|      | 2.19189429  |            | 8.33992508 5.66484346  |
|      | 7.14796552  |            | 8.27513529 5.59969588  |
|      | 9.20053462  |            | 3.13964817 5.29570041  |
|      | 4.20787723  |            | 3.14027527 5.29682354  |
|      | 4.68084604  |            | 10.80186764 4.25729722 |
|      | -0.32256504 |            | 10.80231763 4.27097765 |
|      | 6.72233395  |            | 5.69741691 4.01438521  |
|      | 1.73147944  |            | 5.71095245 4.01679675  |
|      | 7.17844025  |            | 12.34971081 3.63958931 |
|      | 2.19282454  |            | 12.34946992 3.63557204 |
|      | 9.23063171  |            | 7.20021755 3.34010216  |
|      | 4.23718169  |            | 7.20890767 3.34574017  |
|      | 5.47292217  |            | 2.23055554 2.34193027  |
|      | 0.48302217  |            | 2.23055554 2.34193027  |
|      | 6.73540357  |            | 9.72874639 2.00704745  |
|      | 1.74550357  |            | 9.72874639 2.00704745  |
|      | 7.98876734  |            | 3.77819959 1.47019894  |
|      | 2.99886734  |            | 3.77819959 1.47019894  |
|      | 9.21347812  |            | 11.29064837 1.28800348 |
|      | 4.22357812  |            | 11.29064837 1.28800348 |
|      | 5.52626486  |            | 6.13002817 0.45987182  |
|      | 0.53636486  |            | 6.13002817 0.45987182  |
|      | 7.45328915  |            | 1.12937154 0.40848067  |
|      | 2.46338915  |            | 1.12937154 0.40848067  |

|             |             |            |
|-------------|-------------|------------|
| 4.75647854  | 8.73880611  | 0.18583303 |
| -0.23342146 | 8.73880611  | 0.18583303 |
| 6.20516953  | 11.30849177 | 8.20957999 |
| 6.57064805  | 7.27113779  | 9.56740031 |
| 4.77084182  | 2.42369291  | 9.39071406 |
| 1.58777054  | 7.21962840  | 9.56598463 |
| 9.76320214  | 2.45712113  | 9.39315343 |
| 2.55139179  | 10.19742030 | 7.11286233 |
| 0.01780475  | 10.89473415 | 6.86227586 |
| 3.19831137  | 7.81281744  | 7.16530561 |
| 8.14480423  | 7.78711186  | 7.13629686 |
| 0.68407286  | 12.42574360 | 4.88334834 |
| 7.53129932  | 0.09603817  | 7.12496534 |
| 3.88102227  | 5.17512499  | 6.97482987 |
| 8.85350136  | 5.17434786  | 6.98624839 |
| 3.21708592  | 2.73068145  | 6.91981717 |
| 8.20089489  | 2.71678349  | 6.92234011 |
| 0.70538347  | 8.31678299  | 6.97556035 |
| 5.63966732  | 8.33012761  | 6.96416215 |
| 4.94897671  | 10.83229703 | 6.96095897 |
| 7.54033795  | 10.31541503 | 7.28527033 |
| 1.38402650  | 5.91307079  | 6.79385687 |
| 6.35599975  | 5.89621399  | 6.78603556 |
| 0.70301197  | 3.29611599  | 6.73349205 |
| 5.69286892  | 3.26603818  | 6.73001019 |
| 0.02160889  | 0.91968943  | 6.66913046 |
| 4.98998847  | 0.87873143  | 6.68066632 |
| 3.25517187  | 11.74748682 | 5.16863235 |
| 8.22981947  | 11.76059864 | 5.18485072 |
| 8.86191047  | 9.24538568  | 5.12204343 |
| 3.87899038  | 9.21300604  | 5.01335467 |
| 7.50935693  | 4.22946933  | 5.03734921 |
| 2.51791467  | 4.23662271  | 5.03299125 |
| 8.19805839  | 6.76603870  | 4.91779449 |
| 3.19257131  | 6.76740453  | 4.92431569 |
| 5.67514738  | 12.40599808 | 4.91850243 |
| 2.53421992  | 0.06364683  | 7.04044100 |
| 3.24096110  | 1.46779136  | 4.84799654 |
| 8.22217765  | 1.46777158  | 4.84724354 |
| 1.39670828  | 9.88361803  | 4.77895664 |
| 6.38193030  | 9.89813089  | 4.87205717 |
| 5.01465017  | 4.85302475  | 4.72869119 |
| 0.02455961  | 4.86501673  | 4.73705209 |
| 0.72985109  | 7.32462217  | 4.71029901 |

|             |             |            |
|-------------|-------------|------------|
| 5.71152448  | 7.28678613  | 4.70508975 |
| 5.75549053  | 2.18745866  | 4.51383208 |
| 0.76672980  | 2.19452179  | 4.51616594 |
| 8.92724451  | 3.16928099  | 3.13275412 |
| 3.93734451  | 3.16928099  | 3.13275412 |
| 9.65447774  | 0.51179240  | 2.92767386 |
| 4.66457774  | 0.51179240  | 2.92767386 |
| 8.19081638  | 10.75315178 | 2.92137328 |
| 3.20091637  | 10.75315178 | 2.92137328 |
| 7.52427827  | 8.16568472  | 2.89047266 |
| 2.53437827  | 8.16568472  | 2.89047266 |
| 6.46140326  | 3.88992115  | 2.81003309 |
| 1.47150326  | 3.88992115  | 2.81003309 |
| 8.23615357  | 5.59719332  | 2.75910422 |
| 3.24625357  | 5.59719332  | 2.75910422 |
| 5.72548353  | 11.29866287 | 2.69921895 |
| 0.73558353  | 11.29866287 | 2.69921895 |
| 5.02271343  | 8.84247544  | 2.64073298 |
| 0.03281343  | 8.84247544  | 2.64073298 |
| 7.16234573  | 1.15467185  | 2.58495906 |
| 2.17244573  | 1.15467185  | 2.58495906 |
| 5.69094282  | 6.28061655  | 2.47308962 |
| 0.70104282  | 6.28061655  | 2.47308962 |
| 4.72644856  | 4.52631212  | 0.98044427 |
| -0.26345145 | 4.52631212  | 0.98044427 |
| 8.98416265  | 2.08401219  | 0.94984236 |
| 3.99426265  | 2.08401219  | 0.94984236 |
| 7.49692293  | 12.16127468 | 0.88189072 |
| 2.50702293  | 12.16127468 | 0.88189072 |
| 8.92881242  | 7.14167817  | 0.77916237 |
| 3.93891242  | 7.14167817  | 0.77916237 |
| 8.23179647  | 9.65808525  | 0.74752367 |
| 3.24189647  | 9.65808525  | 0.74752367 |
| 6.50168782  | 2.71004334  | 0.73384591 |
| 1.51178782  | 2.71004334  | 0.73384591 |
| 5.78449336  | 0.24636792  | 0.66762456 |
| 0.79459336  | 0.24636792  | 0.66762456 |
| 6.40908241  | 7.83185195  | 0.60482946 |
| 1.41918241  | 7.83185195  | 0.60482946 |
| 7.18588982  | 5.31081574  | 0.60368013 |
| 2.19598981  | 5.31081574  | 0.60368013 |
| 5.68450729  | 10.28863881 | 0.50651002 |
| 0.69460729  | 10.28863881 | 0.50651002 |

# TS for O+CH<sub>cv</sub>->OH+C<sub>cv</sub>

1.000000000000

|             |             |             |    |
|-------------|-------------|-------------|----|
| 9.97980000  | 0.00000000  | 0.00000000  |    |
| -0.76395804 | 12.66177393 | 0.00000000  |    |
| 0.00000004  | 0.00000004  | 19.64040000 |    |
| H           | C           | O           | Fe |
| 2           | 40          | 5           | 80 |

Cart

|             |             |            |
|-------------|-------------|------------|
| 5.15228243  | 10.14678176 | 8.34332458 |
| 1.24819409  | 11.30215430 | 7.95501885 |
| 4.27943365  | 9.31565900  | 7.61834911 |
| 4.61926101  | 2.59771390  | 8.21680702 |
| 1.78849843  | 7.53504046  | 8.43071432 |
| 9.61913394  | 2.61681803  | 8.21838044 |
| 6.80779637  | 7.50392469  | 8.41500247 |
| 9.17800186  | 9.29577869  | 7.40555002 |
| 2.20195855  | 4.27349634  | 7.19889598 |
| 7.19742296  | 4.25077780  | 7.19693688 |
| 3.41682268  | 11.96137124 | 7.11098631 |
| 8.46795320  | 11.97006317 | 7.15737874 |
| -0.32689500 | 6.77331408  | 6.30586944 |
| 4.65810929  | 6.80093486  | 6.32491036 |
| 1.73510368  | 1.62812910  | 6.17366865 |
| 6.73572577  | 1.57692362  | 6.17027073 |
| 2.19106277  | 8.32591400  | 5.65173401 |
| 7.15549749  | 8.27733555  | 5.60753140 |
| 9.20323747  | 3.14881288  | 5.29567190 |
| 4.20739971  | 3.14367629  | 5.29753031 |
| 4.68054662  | 10.84116146 | 4.30071671 |
| -0.32479995 | 10.80756513 | 4.27379294 |
| 6.72540475  | 5.70159803  | 4.01585334 |
| 1.73869129  | 5.71568003  | 4.01749958 |
| 7.18856480  | 12.34821052 | 3.63910664 |
| 2.18027595  | 12.35178264 | 3.62486631 |
| 9.23129479  | 7.20021357  | 3.33940828 |
| 4.23961911  | 7.20621228  | 3.35019913 |
| 5.47292217  | 2.23055554  | 2.34193027 |
| 0.48302217  | 2.23055554  | 2.34193027 |
| 6.73540357  | 9.72874639  | 2.00704745 |
| 1.74550357  | 9.72874639  | 2.00704745 |
| 7.98876734  | 3.77819959  | 1.47019894 |
| 2.99886734  | 3.77819959  | 1.47019894 |
| 9.21347812  | 11.29064837 | 1.28800348 |

|             |             |            |
|-------------|-------------|------------|
| 4.22357812  | 11.29064837 | 1.28800348 |
| 5.52626486  | 6.13002817  | 0.45987182 |
| 0.53636486  | 6.13002817  | 0.45987182 |
| 7.45328915  | 1.12937154  | 0.40848067 |
| 2.46338915  | 1.12937154  | 0.40848067 |
| 4.75647854  | 8.73880611  | 0.18583303 |
| -0.23342146 | 8.73880611  | 0.18583303 |
| 6.12602453  | 11.13305990 | 8.33663250 |
| 6.59130718  | 7.23681625  | 9.55670486 |
| 4.76524129  | 2.41448353  | 9.38709435 |
| 1.63522591  | 7.28397743  | 9.58564169 |
| 9.75021299  | 2.43618709  | 9.39280702 |
| 2.52851458  | 10.26064988 | 7.14686051 |
| 0.01310691  | 10.90628522 | 6.88276333 |
| 3.21399644  | 7.84568347  | 7.18345026 |
| 8.17442595  | 7.77839864  | 7.13548873 |
| 0.67034356  | 12.43148625 | 4.88803319 |
| 7.47145541  | 0.05321805  | 7.18199992 |
| 3.88027337  | 5.17368490  | 6.97695420 |
| 8.86523771  | 5.16575790  | 6.98517641 |
| 3.20926310  | 2.73282129  | 6.91998549 |
| 8.19522072  | 2.70278326  | 6.92016002 |
| 0.72190684  | 8.31993124  | 6.98191961 |
| 5.69728904  | 8.29364124  | 6.96622516 |
| 4.94651754  | 10.93383481 | 6.76371134 |
| 7.55257350  | 10.30991748 | 7.32761283 |
| 1.39274721  | 5.91398980  | 6.79729097 |
| 6.37069360  | 5.87808674  | 6.77702745 |
| 0.69889612  | 3.29297285  | 6.73644775 |
| 5.69413251  | 3.27527326  | 6.73445149 |
| 0.00496535  | 0.90904648  | 6.68672172 |
| 4.97903589  | 0.91186905  | 6.66230331 |
| 3.22599590  | 11.78366384 | 5.15291701 |
| 8.22193197  | 11.75645475 | 5.20054729 |
| 8.86950064  | 9.24729282  | 5.12652374 |
| 3.88924334  | 9.23111315  | 5.04610274 |
| 7.51011994  | 4.22758522  | 5.03894167 |
| 2.51896007  | 4.24173718  | 5.03772780 |
| 8.20088894  | 6.76442896  | 4.91576486 |
| 3.20201302  | 6.77698772  | 4.94433356 |
| 5.68831816  | 12.45959975 | 4.88831518 |
| 2.50712289  | 0.08968664  | 7.05879811 |
| 3.22497775  | 1.48489877  | 4.84075671 |
| 8.23424433  | 1.47405440  | 4.84313498 |

|             |             |            |
|-------------|-------------|------------|
| 1.40095208  | 9.89263282  | 4.80454351 |
| 6.39240883  | 9.89627405  | 4.84325067 |
| 5.01621156  | 4.85332914  | 4.72548786 |
| 0.03031384  | 4.86783956  | 4.73643338 |
| 0.73323609  | 7.31892723  | 4.71177141 |
| 5.71149331  | 7.28726730  | 4.71022721 |
| 5.75401183  | 2.20183139  | 4.51286468 |
| 0.76060055  | 2.19992479  | 4.51654591 |
| 8.92724451  | 3.16928099  | 3.13275412 |
| 3.93734451  | 3.16928099  | 3.13275412 |
| 9.65447774  | 0.51179240  | 2.92767386 |
| 4.66457774  | 0.51179240  | 2.92767386 |
| 8.19081638  | 10.75315178 | 2.92137328 |
| 3.20091637  | 10.75315178 | 2.92137328 |
| 7.52427827  | 8.16568472  | 2.89047266 |
| 2.53437827  | 8.16568472  | 2.89047266 |
| 6.46140326  | 3.88992115  | 2.81003309 |
| 1.47150326  | 3.88992115  | 2.81003309 |
| 8.23615357  | 5.59719332  | 2.75910422 |
| 3.24625357  | 5.59719332  | 2.75910422 |
| 5.72548353  | 11.29866287 | 2.69921895 |
| 0.73558353  | 11.29866287 | 2.69921895 |
| 5.02271343  | 8.84247544  | 2.64073298 |
| 0.03281343  | 8.84247544  | 2.64073298 |
| 7.16234573  | 1.15467185  | 2.58495906 |
| 2.17244573  | 1.15467185  | 2.58495906 |
| 5.69094282  | 6.28061655  | 2.47308962 |
| 0.70104282  | 6.28061655  | 2.47308962 |
| 4.72644856  | 4.52631212  | 0.98044427 |
| -0.26345145 | 4.52631212  | 0.98044427 |
| 8.98416265  | 2.08401219  | 0.94984236 |
| 3.99426265  | 2.08401219  | 0.94984236 |
| 7.49692293  | 12.16127468 | 0.88189072 |
| 2.50702293  | 12.16127468 | 0.88189072 |
| 8.92881242  | 7.14167817  | 0.77916237 |
| 3.93891242  | 7.14167817  | 0.77916237 |
| 8.23179647  | 9.65808525  | 0.74752367 |
| 3.24189647  | 9.65808525  | 0.74752367 |
| 6.50168782  | 2.71004334  | 0.73384591 |
| 1.51178782  | 2.71004334  | 0.73384591 |
| 5.78449336  | 0.24636792  | 0.66762456 |
| 0.79459336  | 0.24636792  | 0.66762456 |
| 6.40908241  | 7.83185195  | 0.60482946 |
| 1.41918241  | 7.83185195  | 0.60482946 |

|            |             |            |
|------------|-------------|------------|
| 7.18588982 | 5.31081574  | 0.60368013 |
| 2.19598981 | 5.31081574  | 0.60368013 |
| 5.68450729 | 10.28863881 | 0.50651002 |
| 0.69460729 | 10.28863881 | 0.50651002 |

# OH

1.000000000000

|             |             |             |
|-------------|-------------|-------------|
| 9.97980000  | 0.00000000  | 0.00000000  |
| -0.76395804 | 12.66177393 | 0.00000000  |
| 0.00000004  | 0.00000004  | 19.64040000 |

|   |    |   |    |
|---|----|---|----|
| H | C  | O | Fe |
| 2 | 40 | 5 | 80 |

Cart

|             |             |            |
|-------------|-------------|------------|
| 6.04278790  | 11.32944215 | 9.42706271 |
| 1.23114035  | 11.29787560 | 7.97556568 |
| 4.18007592  | 9.28879967  | 7.38122387 |
| 4.63369123  | 2.59460578  | 8.21897912 |
| 1.80464958  | 7.50567474  | 8.41770307 |
| 9.60734005  | 2.60673880  | 8.22727420 |
| 6.75241553  | 7.55391515  | 8.40931881 |
| 9.17241221  | 9.29955070  | 7.39397927 |
| 2.20633252  | 4.26120882  | 7.20292864 |
| 7.19654529  | 4.25577326  | 7.20137754 |
| 3.42227539  | 11.97079487 | 7.18255285 |
| 8.47629763  | 11.97383850 | 7.12987932 |
| -0.34293454 | 6.77734358  | 6.30733790 |
| 4.64666008  | 6.77056109  | 6.30075233 |
| 1.74818674  | 1.62704156  | 6.16661804 |
| 6.73162517  | 1.60912785  | 6.14924672 |
| 2.16452838  | 8.28791669  | 5.58920831 |
| 7.14680497  | 8.28012505  | 5.58891603 |
| 9.20569656  | 3.13485379  | 5.29686937 |
| 4.21205966  | 3.13507908  | 5.29935684 |
| 4.67170168  | 10.79898039 | 4.25767882 |
| -0.32555690 | 10.80660073 | 4.27047672 |
| 6.72215818  | 5.68986735  | 4.01339107 |
| 1.73178780  | 5.69188478  | 4.01384600 |
| 7.17807909  | 12.34664838 | 3.64446068 |
| 2.19599782  | 12.34599731 | 3.64339422 |
| 9.22592390  | 7.19953387  | 3.33585555 |
| 4.23523007  | 7.19966071  | 3.33129715 |
| 5.47292217  | 2.23055554  | 2.34193027 |
| 0.48302217  | 2.23055554  | 2.34193027 |

|             |             |            |
|-------------|-------------|------------|
| 6.73540357  | 9.72874639  | 2.00704745 |
| 1.74550357  | 9.72874639  | 2.00704745 |
| 7.98876734  | 3.77819959  | 1.47019894 |
| 2.99886734  | 3.77819959  | 1.47019894 |
| 9.21347812  | 11.29064837 | 1.28800348 |
| 4.22357812  | 11.29064837 | 1.28800348 |
| 5.52626486  | 6.13002817  | 0.45987182 |
| 0.53636486  | 6.13002817  | 0.45987182 |
| 7.45328915  | 1.12937154  | 0.40848067 |
| 2.46338915  | 1.12937154  | 0.40848067 |
| 4.75647854  | 8.73880611  | 0.18583303 |
| -0.23342146 | 8.73880611  | 0.18583303 |
| 6.23778691  | 11.35500569 | 8.47602775 |
| 6.59294185  | 7.28292366  | 9.56249845 |
| 4.80333195  | 2.40252416  | 9.38783772 |
| 1.58051926  | 7.25266943  | 9.56245650 |
| 9.77648620  | 2.43227919  | 9.39798670 |
| 2.50969236  | 10.28212983 | 7.17154340 |
| 0.01343054  | 10.90464837 | 6.88766652 |
| 3.16486485  | 7.78226156  | 7.13286441 |
| 8.15639321  | 7.79145803  | 7.13284060 |
| 0.67835933  | 12.42571971 | 4.88836179 |
| 7.51959901  | 0.14549025  | 7.14999748 |
| 3.87433608  | 5.16663669  | 6.98984510 |
| 8.86316385  | 5.16855701  | 6.98497324 |
| 3.21981540  | 2.72492828  | 6.92627384 |
| 8.21125091  | 2.72056119  | 6.92195110 |
| 0.70385937  | 8.31411974  | 6.95441768 |
| 5.68571605  | 8.29593687  | 6.93652598 |
| 4.96559582  | 10.93713739 | 6.99856851 |
| 7.54316118  | 10.30768162 | 7.29338154 |
| 1.37140635  | 5.88810944  | 6.78593742 |
| 6.36597313  | 5.88232152  | 6.77424640 |
| 0.70436664  | 3.28434827  | 6.73651373 |
| 5.69736889  | 3.27681862  | 6.73221642 |
| 0.01394348  | 0.91601925  | 6.67380223 |
| 4.98936093  | 0.90738887  | 6.67052370 |
| 3.24997693  | 11.75698804 | 5.18634223 |
| 8.22062274  | 11.75545653 | 5.19508061 |
| 8.87306784  | 9.23988420  | 5.11403028 |
| 3.89375426  | 9.24771030  | 5.13293668 |
| 7.51047602  | 4.22118903  | 5.03708242 |
| 2.52087422  | 4.22550268  | 5.04026945 |
| 8.19108092  | 6.75918528  | 4.91691588 |



|             |             |            |
|-------------|-------------|------------|
| 3.20116049  | 6.76074768  | 4.91394725 |
| 5.67357829  | 12.41361342 | 4.91992570 |
| 2.51108428  | 0.08806132  | 7.05666987 |
| 3.23592364  | 1.47097094  | 4.84278620 |
| 8.22427251  | 1.47207467  | 4.83601257 |
| 1.39670053  | 9.88950511  | 4.81455543 |
| 6.38505049  | 9.90310059  | 4.85621049 |
| 5.01344940  | 4.84875606  | 4.72935313 |
| 0.02359522  | 4.84984899  | 4.72720178 |
| 0.71802865  | 7.28808680  | 4.70630635 |
| 5.70818608  | 7.28390247  | 4.69686332 |
| 5.75335510  | 2.19472740  | 4.50546981 |
| 0.76555496  | 2.19513164  | 4.50923846 |
| 8.92724451  | 3.16928099  | 3.13275412 |
| 3.93734451  | 3.16928099  | 3.13275412 |
| 9.65447774  | 0.51179240  | 2.92767386 |
| 4.66457774  | 0.51179240  | 2.92767386 |
| 8.19081638  | 10.75315178 | 2.92137328 |
| 3.20091637  | 10.75315178 | 2.92137328 |
| 7.52427827  | 8.16568472  | 2.89047266 |
| 2.53437827  | 8.16568472  | 2.89047266 |
| 6.46140326  | 3.88992115  | 2.81003309 |
| 1.47150326  | 3.88992115  | 2.81003309 |
| 8.23615357  | 5.59719332  | 2.75910422 |
| 3.24625357  | 5.59719332  | 2.75910422 |
| 5.72548353  | 11.29866287 | 2.69921895 |
| 0.73558353  | 11.29866287 | 2.69921895 |
| 5.02271343  | 8.84247544  | 2.64073298 |
| 0.03281343  | 8.84247544  | 2.64073298 |
| 7.16234573  | 1.15467185  | 2.58495906 |
| 2.17244573  | 1.15467185  | 2.58495906 |
| 5.69094282  | 6.28061655  | 2.47308962 |
| 0.70104282  | 6.28061655  | 2.47308962 |
| 4.72644856  | 4.52631212  | 0.98044427 |
| -0.26345145 | 4.52631212  | 0.98044427 |
| 8.98416265  | 2.08401219  | 0.94984236 |
| 3.99426265  | 2.08401219  | 0.94984236 |
| 7.49692293  | 12.16127468 | 0.88189072 |
| 2.50702293  | 12.16127468 | 0.88189072 |
| 8.92881242  | 7.14167817  | 0.77916237 |
| 3.93891242  | 7.14167817  | 0.77916237 |
| 8.23179647  | 9.65808525  | 0.74752367 |
| 3.24189647  | 9.65808525  | 0.74752367 |
| 6.50168782  | 2.71004334  | 0.73384591 |

|            |             |            |
|------------|-------------|------------|
| 1.51178782 | 2.71004334  | 0.73384591 |
| 5.78449336 | 0.24636792  | 0.66762456 |
| 0.79459336 | 0.24636792  | 0.66762456 |
| 6.40908241 | 7.83185195  | 0.60482946 |
| 1.41918241 | 7.83185195  | 0.60482946 |
| 7.18588982 | 5.31081574  | 0.60368013 |
| 2.19598981 | 5.31081574  | 0.60368013 |
| 5.68450729 | 10.28863881 | 0.50651002 |
| 0.69460729 | 10.28863881 | 0.50651002 |

# OH+H

1.000000000000

|             |             |             |    |
|-------------|-------------|-------------|----|
| 9.97980000  | 0.00000000  | 0.00000000  |    |
| -0.76395804 | 12.66177393 | 0.00000000  |    |
| 0.00000004  | 0.00000004  | 19.64040000 |    |
| H           | C           | O           | Fe |
| 3           | 40          | 5           | 80 |

Cart

|             |             |            |
|-------------|-------------|------------|
| 6.44661093  | 1.45905293  | 9.10029099 |
| 6.22768448  | 11.13428541 | 7.90532706 |
| 1.24722174  | 11.29735935 | 7.96534984 |
| 4.17911828  | 9.25461577  | 7.38511018 |
| 4.58099365  | 2.94997148  | 8.23978976 |
| 1.78224465  | 7.51631952  | 8.41468500 |
| 9.59726807  | 2.60412535  | 8.21461039 |
| 6.78605525  | 7.50335409  | 8.41139360 |
| 9.17550638  | 9.27849402  | 7.38291659 |
| 2.19167915  | 4.23872935  | 7.17622720 |
| 7.19262340  | 4.24395761  | 7.19155310 |
| 3.44165650  | 11.89591212 | 7.14231111 |
| 8.40801283  | 11.93633979 | 7.18843428 |
| -0.32996920 | 6.74887674  | 6.29834918 |
| 4.65834878  | 6.73700497  | 6.29977896 |
| 1.74118261  | 1.58788356  | 6.17228150 |
| 6.74278369  | 1.60291163  | 6.10483476 |
| 2.17145183  | 8.28062421  | 5.59790382 |
| 7.16533719  | 8.28507021  | 5.59718506 |
| 9.19888946  | 3.12986139  | 5.28238325 |
| 4.19824619  | 3.12540989  | 5.26503766 |
| 4.67778369  | 10.81987759 | 4.28535933 |
| -0.32089776 | 10.79953006 | 4.26420081 |
| 6.72258265  | 5.69444435  | 4.01099882 |
| 1.73297165  | 5.69038411  | 4.00982082 |

|             |             |            |
|-------------|-------------|------------|
| 7.17923893  | 12.34289372 | 3.66049014 |
| 2.18880212  | 12.34821386 | 3.63966669 |
| 9.22750521  | 7.20209286  | 3.33521478 |
| 4.23669425  | 7.20250114  | 3.33575556 |
| 5.47292217  | 2.23055554  | 2.34193027 |
| 0.48302217  | 2.23055554  | 2.34193027 |
| 6.73540357  | 9.72874639  | 2.00704745 |
| 1.74550357  | 9.72874639  | 2.00704745 |
| 7.98876734  | 3.77819959  | 1.47019894 |
| 2.99886734  | 3.77819959  | 1.47019894 |
| 9.21347812  | 11.29064837 | 1.28800348 |
| 4.22357812  | 11.29064837 | 1.28800348 |
| 5.52626486  | 6.13002817  | 0.45987182 |
| 0.53636486  | 6.13002817  | 0.45987182 |
| 7.45328915  | 1.12937154  | 0.40848067 |
| 2.46338915  | 1.12937154  | 0.40848067 |
| 4.75647854  | 8.73880611  | 0.18583303 |
| -0.23342146 | 8.73880611  | 0.18583303 |
| 6.25158791  | 0.60651223  | 8.66133717 |
| 6.60468049  | 7.26503536  | 9.56635465 |
| 4.68441291  | 3.02542521  | 9.42925686 |
| 1.60131310  | 7.28679798  | 9.57200472 |
| 9.69182650  | 2.43030947  | 9.39288642 |
| 2.52614335  | 10.24399349 | 7.17616070 |
| -0.00821835 | 10.90639828 | 6.91517839 |
| 3.17350785  | 7.75688769  | 7.13114534 |
| 8.17156240  | 7.76684718  | 7.13050347 |
| 0.67862108  | 12.41115453 | 4.90299218 |
| 7.49436963  | 0.11952344  | 7.24489467 |
| 3.86679938  | 5.14512251  | 7.00135829 |
| 8.85872360  | 5.15358814  | 6.99900435 |
| 3.22247407  | 2.70913774  | 6.91156502 |
| 8.19929511  | 2.71205736  | 6.89703808 |
| 0.70497585  | 8.29848666  | 6.95205695 |
| 5.70137560  | 8.28728016  | 6.95378561 |
| 4.98766471  | 10.83213794 | 6.81860405 |
| 7.51597429  | 10.25927117 | 7.16484589 |
| 1.37725217  | 5.88166629  | 6.79891300 |
| 6.37834148  | 5.88362438  | 6.78806534 |
| 0.69757446  | 3.25152100  | 6.73348418 |
| 5.69450924  | 3.28519415  | 6.68340251 |
| 0.00829834  | 0.87103809  | 6.71481604 |
| 5.10766541  | 0.85978181  | 6.99409483 |
| 3.25172807  | 11.78948696 | 5.18724883 |

|             |             |            |
|-------------|-------------|------------|
| 8.23226674  | 11.74529897 | 5.19758771 |
| 8.88489145  | 9.22559259  | 5.09918907 |
| 3.88309083  | 9.22369940  | 5.07307541 |
| 7.50988102  | 4.22717798  | 5.03531336 |
| 2.51484525  | 4.22084387  | 5.04175772 |
| 8.19654829  | 6.75269926  | 4.91393182 |
| 3.20694889  | 6.74889821  | 4.91510696 |
| 5.67656100  | 12.44372387 | 4.93269080 |
| 2.53940492  | 0.07287587  | 7.08247145 |
| 3.21869653  | 1.46009930  | 4.83829700 |
| 8.24529537  | 1.44218694  | 4.84541984 |
| 1.40479768  | 9.89372004  | 4.83293795 |
| 6.39674606  | 9.88300720  | 4.80149817 |
| 5.00913182  | 4.86285846  | 4.72874711 |
| 0.02842232  | 4.85118777  | 4.74705093 |
| 0.72790606  | 7.28672762  | 4.70222392 |
| 5.71531054  | 7.29359660  | 4.70025545 |
| 5.73723520  | 2.17600058  | 4.49806418 |
| 0.76707829  | 2.18177166  | 4.51205760 |
| 8.92724451  | 3.16928099  | 3.13275412 |
| 3.93734451  | 3.16928099  | 3.13275412 |
| 9.65447774  | 0.51179240  | 2.92767386 |
| 4.66457774  | 0.51179240  | 2.92767386 |
| 8.19081638  | 10.75315178 | 2.92137328 |
| 3.20091637  | 10.75315178 | 2.92137328 |
| 7.52427827  | 8.16568472  | 2.89047266 |
| 2.53437827  | 8.16568472  | 2.89047266 |
| 6.46140326  | 3.88992115  | 2.81003309 |
| 1.47150326  | 3.88992115  | 2.81003309 |
| 8.23615357  | 5.59719332  | 2.75910422 |
| 3.24625357  | 5.59719332  | 2.75910422 |
| 5.72548353  | 11.29866287 | 2.69921895 |
| 0.73558353  | 11.29866287 | 2.69921895 |
| 5.02271343  | 8.84247544  | 2.64073298 |
| 0.03281343  | 8.84247544  | 2.64073298 |
| 7.16234573  | 1.15467185  | 2.58495906 |
| 2.17244573  | 1.15467185  | 2.58495906 |
| 5.69094282  | 6.28061655  | 2.47308962 |
| 0.70104282  | 6.28061655  | 2.47308962 |
| 4.72644856  | 4.52631212  | 0.98044427 |
| -0.26345145 | 4.52631212  | 0.98044427 |
| 8.98416265  | 2.08401219  | 0.94984236 |
| 3.99426265  | 2.08401219  | 0.94984236 |
| 7.49692293  | 12.16127468 | 0.88189072 |

|            |             |            |
|------------|-------------|------------|
| 2.50702293 | 12.16127468 | 0.88189072 |
| 8.92881242 | 7.14167817  | 0.77916237 |
| 3.93891242 | 7.14167817  | 0.77916237 |
| 8.23179647 | 9.65808525  | 0.74752367 |
| 3.24189647 | 9.65808525  | 0.74752367 |
| 6.50168782 | 2.71004334  | 0.73384591 |
| 1.51178782 | 2.71004334  | 0.73384591 |
| 5.78449336 | 0.24636792  | 0.66762456 |
| 0.79459336 | 0.24636792  | 0.66762456 |
| 6.40908241 | 7.83185195  | 0.60482946 |
| 1.41918241 | 7.83185195  | 0.60482946 |
| 7.18588982 | 5.31081574  | 0.60368013 |
| 2.19598981 | 5.31081574  | 0.60368013 |
| 5.68450729 | 10.28863881 | 0.50651002 |
| 0.69460729 | 10.28863881 | 0.50651002 |

# TS for OH+H->H<sub>2</sub>O

1.000000000000

|             |             |             |    |
|-------------|-------------|-------------|----|
| 9.97980000  | 0.00000000  | 0.00000000  |    |
| -0.76395804 | 12.66177393 | 0.00000000  |    |
| 0.00000004  | 0.00000004  | 19.64040000 |    |
| H           | C           | O           | Fe |
| 3           | 40          | 5           | 80 |

Cart

|             |             |            |
|-------------|-------------|------------|
| 6.27188870  | 0.31267350  | 9.43592197 |
| 5.93049269  | 11.47297708 | 8.23996366 |
| 1.23973108  | 11.33069795 | 7.96955670 |
| 4.19693264  | 9.31437190  | 7.38660209 |
| 4.62100367  | 2.74458867  | 8.23457221 |
| 1.77748019  | 7.58960702  | 8.41945907 |
| 9.60029350  | 2.62549319  | 8.22071728 |
| 6.76655563  | 7.57071176  | 8.41981987 |
| 9.16981732  | 9.31075086  | 7.38189393 |
| 2.18881536  | 4.27332752  | 7.19445618 |
| 7.18894042  | 4.26485641  | 7.19413838 |
| 3.46708482  | 11.96308831 | 7.17290566 |
| 8.39242452  | 11.95276184 | 7.14820004 |
| -0.33562530 | 6.78411053  | 6.31197581 |
| 4.65176271  | 6.78004007  | 6.30804865 |
| 1.74215048  | 1.62740861  | 6.18157275 |
| 6.73967582  | 1.58628946  | 6.16121292 |
| 2.16875053  | 8.29371692  | 5.59227646 |
| 7.15812869  | 8.29873507  | 5.59527892 |

|             |             |            |
|-------------|-------------|------------|
| 9.19617666  | 3.14136627  | 5.29515452 |
| 4.20810753  | 3.13737852  | 5.29407843 |
| 4.67620335  | 10.82780033 | 4.28022190 |
| -0.32332795 | 10.81855405 | 4.26742051 |
| 6.72246929  | 5.70205191  | 4.01263571 |
| 1.73352053  | 5.70093412  | 4.01207280 |
| 7.17853251  | 12.34948992 | 3.64234706 |
| 2.18975991  | 12.35008167 | 3.63796284 |
| 9.22803152  | 7.20203323  | 3.33715027 |
| 4.23812134  | 7.20150169  | 3.33525814 |
| 5.47292217  | 2.23055554  | 2.34193027 |
| 0.48302217  | 2.23055554  | 2.34193027 |
| 6.73540357  | 9.72874639  | 2.00704745 |
| 1.74550357  | 9.72874639  | 2.00704745 |
| 7.98876734  | 3.77819959  | 1.47019894 |
| 2.99886734  | 3.77819959  | 1.47019894 |
| 9.21347812  | 11.29064837 | 1.28800348 |
| 4.22357812  | 11.29064837 | 1.28800348 |
| 5.52626486  | 6.13002817  | 0.45987182 |
| 0.53636486  | 6.13002817  | 0.45987182 |
| 7.45328915  | 1.12937154  | 0.40848067 |
| 2.46338915  | 1.12937154  | 0.40848067 |
| 4.75647854  | 8.73880611  | 0.18583303 |
| -0.23342146 | 8.73880611  | 0.18583303 |
| 6.35525001  | 12.57952064 | 9.14229387 |
| 6.59072273  | 7.33718184  | 9.57446037 |
| 4.72412149  | 2.61873805  | 9.42033868 |
| 1.60541614  | 7.35123390  | 9.57417247 |
| 9.72989288  | 2.44999861  | 9.39282060 |
| 2.53836288  | 10.30266538 | 7.20282175 |
| -0.01434733 | 10.93373586 | 6.91012186 |
| 3.17486149  | 7.80848684  | 7.13178319 |
| 8.16409847  | 7.79774522  | 7.13315543 |
| 0.67996742  | 12.42275705 | 4.89501712 |
| 7.47997552  | 0.13682845  | 7.25974455 |
| 3.86468402  | 5.17932998  | 6.99518604 |
| 8.85668052  | 5.17513230  | 6.98644142 |
| 3.21182469  | 2.74095495  | 6.91967414 |
| 8.19868778  | 2.72902736  | 6.90987458 |
| 0.70490907  | 8.33288099  | 6.94731967 |
| 5.69992553  | 8.32494941  | 6.94951371 |
| 5.00676705  | 10.90649836 | 6.86983311 |
| 7.49504903  | 10.27014790 | 7.12623980 |
| 1.37716217  | 5.91007133  | 6.78926932 |

|            |             |            |
|------------|-------------|------------|
| 6.36553061 | 5.90320821  | 6.78999628 |
| 0.69690823 | 3.28168042  | 6.73417792 |
| 5.68767211 | 3.29086468  | 6.72739970 |
| 0.01423777 | 0.88567562  | 6.68994487 |
| 4.98319644 | 0.91440247  | 6.65794616 |
| 3.23886094 | 11.77178860 | 5.17780238 |
| 8.22515525 | 11.77487216 | 5.18659856 |
| 8.88461753 | 9.23817721  | 5.08829680 |
| 3.88558107 | 9.24274049  | 5.09079271 |
| 7.50485300 | 4.23572212  | 5.03593398 |
| 2.51648194 | 4.23473546  | 5.03962427 |
| 8.19457257 | 6.76417999  | 4.91934912 |
| 3.20550569 | 6.76424993  | 4.91901935 |
| 5.68528779 | 12.43431408 | 4.91337908 |
| 2.52976340 | 0.08903023  | 7.05792432 |
| 3.22467458 | 1.47755086  | 4.84368917 |
| 8.22750537 | 1.46981276  | 4.84822199 |
| 1.40014083 | 9.90589066  | 4.83699306 |
| 6.39518423 | 9.89452624  | 4.79741744 |
| 5.01224476 | 4.85930576  | 4.73300772 |
| 0.02487067 | 4.85730633  | 4.73321380 |
| 0.72234243 | 7.29367271  | 4.70484619 |
| 5.71201993 | 7.29625688  | 4.70440497 |
| 5.75099941 | 2.19553783  | 4.50875986 |
| 0.76183092 | 2.19267351  | 4.51498492 |
| 8.92724451 | 3.16928099  | 3.13275412 |
| 3.93734451 | 3.16928099  | 3.13275412 |
| 9.65447774 | 0.51179240  | 2.92767386 |
| 4.66457774 | 0.51179240  | 2.92767386 |
| 8.19081638 | 10.75315178 | 2.92137328 |
| 3.20091637 | 10.75315178 | 2.92137328 |
| 7.52427827 | 8.16568472  | 2.89047266 |
| 2.53437827 | 8.16568472  | 2.89047266 |
| 6.46140326 | 3.88992115  | 2.81003309 |
| 1.47150326 | 3.88992115  | 2.81003309 |
| 8.23615357 | 5.59719332  | 2.75910422 |
| 3.24625357 | 5.59719332  | 2.75910422 |
| 5.72548353 | 11.29866287 | 2.69921895 |
| 0.73558353 | 11.29866287 | 2.69921895 |
| 5.02271343 | 8.84247544  | 2.64073298 |
| 0.03281343 | 8.84247544  | 2.64073298 |
| 7.16234573 | 1.15467185  | 2.58495906 |
| 2.17244573 | 1.15467185  | 2.58495906 |
| 5.69094282 | 6.28061655  | 2.47308962 |

|             |             |            |
|-------------|-------------|------------|
| 0.70104282  | 6.28061655  | 2.47308962 |
| 4.72644856  | 4.52631212  | 0.98044427 |
| -0.26345145 | 4.52631212  | 0.98044427 |
| 8.98416265  | 2.08401219  | 0.94984236 |
| 3.99426265  | 2.08401219  | 0.94984236 |
| 7.49692293  | 12.16127468 | 0.88189072 |
| 2.50702293  | 12.16127468 | 0.88189072 |
| 8.92881242  | 7.14167817  | 0.77916237 |
| 3.93891242  | 7.14167817  | 0.77916237 |
| 8.23179647  | 9.65808525  | 0.74752367 |
| 3.24189647  | 9.65808525  | 0.74752367 |
| 6.50168782  | 2.71004334  | 0.73384591 |
| 1.51178782  | 2.71004334  | 0.73384591 |
| 5.78449336  | 0.24636792  | 0.66762456 |
| 0.79459336  | 0.24636792  | 0.66762456 |
| 6.40908241  | 7.83185195  | 0.60482946 |
| 1.41918241  | 7.83185195  | 0.60482946 |
| 7.18588982  | 5.31081574  | 0.60368013 |
| 2.19598981  | 5.31081574  | 0.60368013 |
| 5.68450729  | 10.28863881 | 0.50651002 |
| 0.69460729  | 10.28863881 | 0.50651002 |

# H<sub>2</sub>O

1.000000000000

|             |             |             |    |
|-------------|-------------|-------------|----|
| 9.97980000  | 0.00000000  | 0.00000000  |    |
| -0.76395804 | 12.66177393 | 0.00000000  |    |
| 0.00000004  | 0.00000004  | 19.64040000 |    |
| H           | C           | O           | Fe |
| 3           | 40          | 5           | 80 |

Cart

|            |             |            |
|------------|-------------|------------|
| 6.28557143 | 0.98839795  | 9.43519389 |
| 5.94834392 | 12.15145013 | 9.68810804 |
| 1.26242619 | 11.30999875 | 7.97935042 |
| 4.21957089 | 9.29211435  | 7.40331851 |
| 4.62693961 | 2.43268076  | 8.16717458 |
| 1.79626493 | 7.59061444  | 8.43278663 |
| 9.55843580 | 2.55156818  | 8.22159909 |
| 6.78997752 | 7.56541524  | 8.43164932 |
| 9.19918909 | 9.27666218  | 7.40952796 |
| 2.19747484 | 4.23762617  | 7.22464772 |
| 7.18253796 | 4.23954278  | 7.21320240 |
| 3.46997241 | 11.93778597 | 7.14904307 |
| 8.38697656 | 11.90414372 | 7.18072323 |



|             |             |            |
|-------------|-------------|------------|
| -0.32126909 | 6.75242855  | 6.31383246 |
| 4.66373800  | 6.75783145  | 6.31315002 |
| 1.73356556  | 1.59625019  | 6.18480900 |
| 6.73658132  | 1.58294732  | 6.14323165 |
| 2.17816570  | 8.28288004  | 5.60336278 |
| 7.17321312  | 8.29636417  | 5.61496688 |
| 9.19719841  | 3.13761403  | 5.29727027 |
| 4.20645683  | 3.13890226  | 5.29971747 |
| 4.68005883  | 10.81833905 | 4.28139086 |
| -0.31733775 | 10.80850281 | 4.26564104 |
| 6.72524966  | 5.69913936  | 4.01284859 |
| 1.73681474  | 5.69034872  | 4.01362104 |
| 7.18727762  | 12.34498324 | 3.64181789 |
| 2.18913297  | 12.34870438 | 3.63698287 |
| 9.23079407  | 7.20408217  | 3.34671774 |
| 4.24054113  | 7.20154004  | 3.34477113 |
| 5.47292217  | 2.23055554  | 2.34193027 |
| 0.48302217  | 2.23055554  | 2.34193027 |
| 6.73540357  | 9.72874639  | 2.00704745 |
| 1.74550357  | 9.72874639  | 2.00704745 |
| 7.98876734  | 3.77819959  | 1.47019894 |
| 2.99886734  | 3.77819959  | 1.47019894 |
| 9.21347812  | 11.29064837 | 1.28800348 |
| 4.22357812  | 11.29064837 | 1.28800348 |
| 5.52626486  | 6.13002817  | 0.45987182 |
| 0.53636486  | 6.13002817  | 0.45987182 |
| 7.45328915  | 1.12937154  | 0.40848067 |
| 2.46338915  | 1.12937154  | 0.40848067 |
| 4.75647854  | 8.73880611  | 0.18583303 |
| -0.23342146 | 8.73880611  | 0.18583303 |
| 6.99171917  | 0.31342051  | 9.24915952 |
| 6.62929092  | 7.34831857  | 9.59309566 |
| 4.87197123  | 2.13623221  | 9.31980116 |
| 1.65417991  | 7.36475616  | 9.59579400 |
| 9.68870868  | 2.38181094  | 9.39800575 |
| 2.56063913  | 10.27467274 | 7.20049320 |
| -0.00176733 | 10.91005703 | 6.92548950 |
| 3.19318997  | 7.79300761  | 7.13854208 |
| 8.18702387  | 7.76959975  | 7.14180413 |
| 0.68054924  | 12.41735187 | 4.90199370 |
| 7.48494791  | 0.09464775  | 7.20172510 |
| 3.86651170  | 5.15814475  | 7.00140571 |
| 8.85648360  | 5.15293611  | 6.99557229 |
| 3.21194873  | 2.70375505  | 6.93482256 |

|            |             |            |
|------------|-------------|------------|
| 8.19779712 | 2.71437480  | 6.90268732 |
| 0.72279125 | 8.30159876  | 6.96076875 |
| 5.71626311 | 8.30963017  | 6.96310405 |
| 5.02722849 | 10.88959394 | 6.79311368 |
| 7.52736000 | 10.20982390 | 7.07889120 |
| 1.38823653 | 5.87532723  | 6.79953080 |
| 6.36985221 | 5.87936500  | 6.81009783 |
| 0.69944447 | 3.24750796  | 6.75323984 |
| 5.68705448 | 3.25249524  | 6.73618571 |
| 0.00387188 | 0.85272311  | 6.71370730 |
| 4.99114658 | 0.88427038  | 6.64602991 |
| 3.23746716 | 11.76171073 | 5.16667729 |
| 8.23276171 | 11.75548975 | 5.19360605 |
| 8.89897833 | 9.21765740  | 5.07403420 |
| 3.89097575 | 9.22326205  | 5.07853417 |
| 7.50626791 | 4.23231459  | 5.03886254 |
| 2.51559099 | 4.22178148  | 5.04922224 |
| 8.19765019 | 6.75408183  | 4.92301967 |
| 3.20918827 | 6.75064596  | 4.92565973 |
| 5.69175340 | 12.43200312 | 4.90069836 |
| 2.53318652 | 0.06346417  | 7.06311111 |
| 3.22315995 | 1.47609319  | 4.84278433 |
| 8.23512757 | 1.45982085  | 4.84379972 |
| 1.40649659 | 9.89611810  | 4.84790382 |
| 6.39946066 | 9.87508739  | 4.77972675 |
| 5.01682710 | 4.85428755  | 4.74513795 |
| 0.03097309 | 4.84997210  | 4.74654274 |
| 0.72962406 | 7.28218305  | 4.71026139 |
| 5.71938727 | 7.29099889  | 4.71132785 |
| 5.74967891 | 2.19651682  | 4.50680305 |
| 0.76079002 | 2.18864248  | 4.52132364 |
| 8.92724451 | 3.16928099  | 3.13275412 |
| 3.93734451 | 3.16928099  | 3.13275412 |
| 9.65447774 | 0.51179240  | 2.92767386 |
| 4.66457774 | 0.51179240  | 2.92767386 |
| 8.19081638 | 10.75315178 | 2.92137328 |
| 3.20091637 | 10.75315178 | 2.92137328 |
| 7.52427827 | 8.16568472  | 2.89047266 |
| 2.53437827 | 8.16568472  | 2.89047266 |
| 6.46140326 | 3.88992115  | 2.81003309 |
| 1.47150326 | 3.88992115  | 2.81003309 |
| 8.23615357 | 5.59719332  | 2.75910422 |
| 3.24625357 | 5.59719332  | 2.75910422 |
| 5.72548353 | 11.29866287 | 2.69921895 |

|             |             |            |
|-------------|-------------|------------|
| 0.73558353  | 11.29866287 | 2.69921895 |
| 5.02271343  | 8.84247544  | 2.64073298 |
| 0.03281343  | 8.84247544  | 2.64073298 |
| 7.16234573  | 1.15467185  | 2.58495906 |
| 2.17244573  | 1.15467185  | 2.58495906 |
| 5.69094282  | 6.28061655  | 2.47308962 |
| 0.70104282  | 6.28061655  | 2.47308962 |
| 4.72644856  | 4.52631212  | 0.98044427 |
| -0.26345145 | 4.52631212  | 0.98044427 |
| 8.98416265  | 2.08401219  | 0.94984236 |
| 3.99426265  | 2.08401219  | 0.94984236 |
| 7.49692293  | 12.16127468 | 0.88189072 |
| 2.50702293  | 12.16127468 | 0.88189072 |
| 8.92881242  | 7.14167817  | 0.77916237 |
| 3.93891242  | 7.14167817  | 0.77916237 |
| 8.23179647  | 9.65808525  | 0.74752367 |
| 3.24189647  | 9.65808525  | 0.74752367 |
| 6.50168782  | 2.71004334  | 0.73384591 |
| 1.51178782  | 2.71004334  | 0.73384591 |
| 5.78449336  | 0.24636792  | 0.66762456 |
| 0.79459336  | 0.24636792  | 0.66762456 |
| 6.40908241  | 7.83185195  | 0.60482946 |
| 1.41918241  | 7.83185195  | 0.60482946 |
| 7.18588982  | 5.31081574  | 0.60368013 |
| 2.19598981  | 5.31081574  | 0.60368013 |
| 5.68450729  | 10.28863881 | 0.50651002 |
| 0.69460729  | 10.28863881 | 0.50651002 |

# OH+OH (state1)

1.000000000000

|             |             |             |    |
|-------------|-------------|-------------|----|
| 9.97980022  | 0.00000000  | 0.00000000  |    |
| -0.76395801 | 12.66177369 | 0.00000000  |    |
| 0.00000004  | 0.00000004  | 19.64039993 |    |
| H           | C           | O           | Fe |
| 3           | 40          | 6           | 80 |

Cart

|            |             |            |
|------------|-------------|------------|
| 4.58217994 | 3.22329912  | 8.86056423 |
| 4.77205474 | 5.37888395  | 9.66844340 |
| 1.22357866 | 11.29728093 | 7.97091136 |
| 4.17936262 | 9.28010911  | 7.37324132 |
| 5.96638827 | 11.39441735 | 8.45260278 |
| 9.59240945 | 2.56009562  | 8.20547102 |
| 6.74669901 | 7.56579109  | 8.40930295 |

|             |             |            |
|-------------|-------------|------------|
| 1.76985574  | 7.60796108  | 8.42449614 |
| 9.16700816  | 9.30041730  | 7.37815941 |
| 2.24904841  | 4.29379768  | 7.09416992 |
| 7.19260997  | 4.25612859  | 7.16222254 |
| 3.41822945  | 11.92609787 | 7.17147167 |
| 8.45043377  | 11.96032562 | 7.16295499 |
| -0.35076332 | 6.78796345  | 6.30037699 |
| 4.62248947  | 6.70353838  | 6.27456808 |
| 4.19961809  | 3.13328091  | 5.24050885 |
| 6.74345791  | 1.57721481  | 6.15731252 |
| 2.16751548  | 8.28724105  | 5.58320264 |
| 7.15029022  | 8.27913591  | 5.57995769 |
| 9.19846087  | 3.14003771  | 5.28565357 |
| 1.74706292  | 1.61890764  | 6.16100711 |
| 4.67292954  | 10.80821129 | 4.26859777 |
| -0.31777703 | 10.80328799 | 4.26397969 |
| 6.71162949  | 5.67794625  | 4.01586675 |
| 1.73716622  | 5.68820315  | 4.02153387 |
| 7.17548078  | 12.34699154 | 3.64553380 |
| 2.19370203  | 12.34366650 | 3.63392465 |
| 9.22545005  | 7.19937874  | 3.32805436 |
| 4.23184541  | 7.20117890  | 3.32764572 |
| 5.47292232  | 2.23055553  | 2.34193015 |
| 0.48302215  | 2.23055553  | 2.34193015 |
| 6.73540354  | 9.72874641  | 2.00704742 |
| 1.74550355  | 9.72874641  | 2.00704742 |
| 7.98876715  | 3.77819967  | 1.47019899 |
| 2.99886727  | 3.77819967  | 1.47019899 |
| 9.21347809  | 11.29064846 | 1.28800344 |
| 4.22357798  | 11.29064846 | 1.28800344 |
| 5.52626467  | 6.13002825  | 0.45987183 |
| 0.53636485  | 6.13002825  | 0.45987183 |
| 7.45328903  | 1.12937152  | 0.40848067 |
| 2.46338916  | 1.12937152  | 0.40848067 |
| 4.75647831  | 8.73880577  | 0.18583304 |
| -0.23342146 | 8.73880577  | 0.18583304 |
| 4.25347346  | 4.78026469  | 9.10010807 |
| 4.64052186  | 2.44846211  | 8.17893035 |
| 1.57080215  | 7.37286698  | 9.57495825 |
| 6.15242145  | 11.46402707 | 9.62743272 |
| 9.79243909  | 2.39479880  | 9.37198015 |
| 6.57471342  | 7.31733564  | 9.56675603 |
| 2.51817399  | 10.26749600 | 7.17456733 |
| 7.52131466  | 10.29269324 | 7.20785480 |

|            |             |            |
|------------|-------------|------------|
| 3.15724530 | 7.78062366  | 7.12994258 |
| 8.14644304 | 7.79633588  | 7.12870415 |
| 0.67936925 | 12.42702805 | 4.88614789 |
| 5.67313257 | 12.42186127 | 4.92218278 |
| 3.87988311 | 5.27557695  | 7.34260240 |
| 8.85678765 | 5.17027282  | 6.97258286 |
| 3.21632605 | 2.70484759  | 6.89895667 |
| 8.20618112 | 2.70864348  | 6.90539328 |
| 0.69878399 | 8.32653027  | 6.93540046 |
| 5.67713100 | 8.28620084  | 6.93135347 |
| 4.98878133 | 10.91522810 | 6.97623663 |
| 8.86673354 | 9.24252438  | 5.10627898 |
| 1.33892472 | 5.89326348  | 6.76002488 |
| 6.36893998 | 5.89957970  | 6.77411666 |
| 0.70971742 | 3.29279119  | 6.72708354 |
| 5.69914320 | 3.26211809  | 6.69627300 |
| 2.50250686 | 0.07069892  | 7.05469866 |
| 4.98293916 | 0.88640463  | 6.74446534 |
| 3.24373880 | 11.76656831 | 5.18766168 |
| 8.23584289 | 11.76430824 | 5.18184337 |
| 0.00400056 | 10.91346734 | 6.88974251 |
| 3.89057440 | 9.24075895  | 5.11176277 |
| 7.50184932 | 4.21643878  | 5.04165749 |
| 2.54234684 | 4.24001479  | 5.06918133 |
| 8.19129140 | 6.75030691  | 4.91542640 |
| 3.19682971 | 6.76398689  | 4.90863095 |
| 7.53431413 | 0.08615142  | 7.10476072 |
| 3.23698303 | 1.46183220  | 4.83317246 |
| 0.76715432 | 2.20223154  | 4.51102352 |
| 8.23330443 | 1.46094369  | 4.83810948 |
| 1.40436637 | 9.89641828  | 4.82043805 |
| 6.38906607 | 9.90747634  | 4.85707975 |
| 4.99866605 | 4.87364211  | 4.77752830 |
| 0.02660615 | 4.84993826  | 4.72176056 |
| 0.71537309 | 7.29790385  | 4.69406506 |
| 5.70933837 | 7.28240324  | 4.69383256 |
| 5.75642022 | 2.18746982  | 4.51479713 |
| 0.02559197 | 0.90200740  | 6.69456008 |
| 8.92724419 | 3.16928101  | 3.13275409 |
| 3.93734455 | 3.16928101  | 3.13275409 |
| 9.65447807 | 0.51179242  | 2.92767382 |
| 4.66457796 | 0.51179242  | 2.92767382 |
| 8.19081593 | 10.75315189 | 2.92137337 |
| 3.20091629 | 10.75315189 | 2.92137337 |

|             |             |            |
|-------------|-------------|------------|
| 7.52427816  | 8.16568470  | 2.89047265 |
| 2.53437829  | 8.16568470  | 2.89047265 |
| 6.46140337  | 3.88992119  | 2.81003308 |
| 1.47150326  | 3.88992119  | 2.81003308 |
| 8.23615360  | 5.59719324  | 2.75910425 |
| 3.24625349  | 5.59719324  | 2.75910425 |
| 5.72548342  | 11.29866314 | 2.69921899 |
| 0.73558354  | 11.29866314 | 2.69921899 |
| 5.02271366  | 8.84247589  | 2.64073300 |
| 0.03281343  | 8.84247589  | 2.64073300 |
| 7.16234589  | 1.15467191  | 2.58495903 |
| 2.17244577  | 1.15467191  | 2.58495903 |
| 5.69094276  | 6.28061676  | 2.47308970 |
| 0.70104283  | 6.28061676  | 2.47308970 |
| 4.72644854  | 4.52631235  | 0.98044425 |
| -0.26345146 | 4.52631235  | 0.98044425 |
| 8.98416233  | 2.08401227  | 0.94984233 |
| 3.99426270  | 2.08401227  | 0.94984233 |
| 7.49692297  | 12.16127491 | 0.88189071 |
| 2.50702286  | 12.16127491 | 0.88189071 |
| 8.92881203  | 7.14167833  | 0.77916235 |
| 3.93891239  | 7.14167833  | 0.77916235 |
| 8.23179626  | 9.65808487  | 0.74752367 |
| 3.24189639  | 9.65808487  | 0.74752367 |
| 6.50168800  | 2.71004343  | 0.73384589 |
| 1.51178777  | 2.71004343  | 0.73384589 |
| 5.78449345  | 0.24636792  | 0.66762453 |
| 0.79459333  | 0.24636792  | 0.66762453 |
| 6.40908241  | 7.83185196  | 0.60482943 |
| 1.41918242  | 7.83185196  | 0.60482943 |
| 7.18588972  | 5.31081581  | 0.60368013 |
| 2.19598985  | 5.31081581  | 0.60368013 |
| 5.68450737  | 10.28863907 | 0.50651002 |
| 0.69460732  | 10.28863907 | 0.50651002 |

# OH+OH (state2)

1.000000000000

|             |             |             |    |
|-------------|-------------|-------------|----|
| 9.97980000  | 0.00000000  | 0.00000000  |    |
| -0.76395804 | 12.66177393 | 0.00000000  |    |
| 0.00000004  | 0.00000004  | 19.64040000 |    |
| H           | C           | O           | Fe |
| 3           | 40          | 6           | 80 |

Cart

|             |             |            |
|-------------|-------------|------------|
| 6.32011190  | 11.51609745 | 9.14200314 |
| 8.02489645  | 0.87310891  | 9.70556410 |
| 1.22699727  | 11.33147282 | 7.96257360 |
| 4.14888691  | 9.28241234  | 7.29983388 |
| 4.64148246  | 2.66476912  | 8.22394684 |
| 2.11958101  | 7.38645061  | 8.55425456 |
| 9.67358166  | 2.79064001  | 8.22603451 |
| 6.79845730  | 7.44903418  | 8.38016877 |
| 9.11905108  | 9.33479446  | 7.39146231 |
| 2.20347523  | 4.27727063  | 7.17667471 |
| 7.19095522  | 4.27320378  | 7.18350396 |
| 3.45927191  | 11.96625350 | 7.21310042 |
| 8.39774542  | 11.99130829 | 7.15401009 |
| -0.33892752 | 6.78193668  | 6.30550390 |
| 4.66115273  | 6.75601820  | 6.26117232 |
| 1.76281307  | 1.64635762  | 6.16476087 |
| 6.73309896  | 1.61341194  | 6.12135738 |
| 2.15074114  | 8.28912669  | 5.56126086 |
| 7.15389529  | 8.28371326  | 5.56499132 |
| 9.20352565  | 3.13474346  | 5.27633805 |
| 4.20833641  | 3.13930344  | 5.28993440 |
| 4.67450750  | 10.79582239 | 4.25524930 |
| -0.33334077 | 10.81676744 | 4.27065776 |
| 6.72286033  | 5.69667883  | 4.01050224 |
| 1.72938908  | 5.69915630  | 4.01189233 |
| 7.17611316  | 12.35273273 | 3.65931285 |
| 2.20104559  | 12.34567615 | 3.65025027 |
| 9.22414196  | 7.20104151  | 3.32078357 |
| 4.23596121  | 7.20343261  | 3.31482135 |
| 5.47292217  | 2.23055554  | 2.34193027 |
| 0.48302217  | 2.23055554  | 2.34193027 |
| 6.73540357  | 9.72874639  | 2.00704745 |
| 1.74550357  | 9.72874639  | 2.00704745 |
| 7.98876734  | 3.77819959  | 1.47019894 |
| 2.99886734  | 3.77819959  | 1.47019894 |
| 9.21347812  | 11.29064837 | 1.28800348 |
| 4.22357812  | 11.29064837 | 1.28800348 |
| 5.52626486  | 6.13002817  | 0.45987182 |
| 0.53636486  | 6.13002817  | 0.45987182 |
| 7.45328915  | 1.12937154  | 0.40848067 |
| 2.46338915  | 1.12937154  | 0.40848067 |
| 4.75647854  | 8.73880611  | 0.18583303 |
| -0.23342146 | 8.73880611  | 0.18583303 |
| 7.32330975  | 0.45973858  | 9.16517435 |

|             |             |            |
|-------------|-------------|------------|
| 6.16554465  | 10.65113426 | 8.63288370 |
| 6.53943267  | 7.22417109  | 9.52276592 |
| 4.76014599  | 2.51988643  | 9.40143952 |
| 1.64290289  | 7.22489814  | 9.62233533 |
| 9.73326253  | 2.62527735  | 9.41023530 |
| 2.49892371  | 10.30311853 | 7.15985356 |
| -0.02325763 | 10.94456011 | 6.91362820 |
| 3.14935661  | 7.76687864  | 7.13223508 |
| 8.15933535  | 7.78937796  | 7.11875245 |
| 0.68657406  | 12.41870385 | 4.89383605 |
| 7.56909086  | 0.33143198  | 7.34053253 |
| 3.86344159  | 5.19634651  | 7.01085153 |
| 8.86610025  | 5.18715376  | 6.99823976 |
| 3.22419811  | 2.74266173  | 6.91466823 |
| 8.22628278  | 2.75355931  | 6.91600422 |
| 0.67085056  | 8.38341964  | 6.90719587 |
| 5.67780620  | 8.28462296  | 6.90357584 |
| 4.99929054  | 10.91559537 | 7.08073093 |
| 7.50690725  | 10.34310555 | 7.30075019 |
| 1.38211274  | 5.91258459  | 6.75953046 |
| 6.38103477  | 5.90318433  | 6.77229170 |
| 0.70460041  | 3.31128140  | 6.71397084 |
| 5.69624425  | 3.28697080  | 6.71467134 |
| 0.03623871  | 0.91323242  | 6.66584907 |
| 5.00792769  | 0.90596829  | 6.69730856 |
| 3.26418254  | 11.75626084 | 5.19889366 |
| 8.21755109  | 11.76145995 | 5.20799800 |
| 8.86817208  | 9.26479413  | 5.14529444 |
| 3.88148527  | 9.25235023  | 5.15278015 |
| 7.51366255  | 4.23295199  | 5.03523566 |
| 2.52115791  | 4.23527477  | 5.03148634 |
| 8.20478888  | 6.76851731  | 4.90743340 |
| 3.20640099  | 6.76943052  | 4.90284945 |
| 5.68150665  | 12.40152741 | 4.95276512 |
| 2.53135376  | 0.09671099  | 7.04647579 |
| 3.24237950  | 1.46583500  | 4.84442757 |
| 8.22715911  | 1.46139897  | 4.85445071 |
| 1.39270266  | 9.91137664  | 4.81999758 |
| 6.38153669  | 9.93150656  | 4.89786750 |
| 5.00936502  | 4.86334727  | 4.74064666 |
| 0.01976168  | 4.86391074  | 4.71994853 |
| 0.71776142  | 7.29856124  | 4.69457073 |
| 5.72182257  | 7.29075821  | 4.67718217 |
| 5.75041993  | 2.19329319  | 4.49871293 |



|             |             |            |
|-------------|-------------|------------|
| 0.76557801  | 2.18618283  | 4.50396849 |
| 8.92724451  | 3.16928099  | 3.13275412 |
| 3.93734451  | 3.16928099  | 3.13275412 |
| 9.65447774  | 0.51179240  | 2.92767386 |
| 4.66457774  | 0.51179240  | 2.92767386 |
| 8.19081638  | 10.75315178 | 2.92137328 |
| 3.20091637  | 10.75315178 | 2.92137328 |
| 7.52427827  | 8.16568472  | 2.89047266 |
| 2.53437827  | 8.16568472  | 2.89047266 |
| 6.46140326  | 3.88992115  | 2.81003309 |
| 1.47150326  | 3.88992115  | 2.81003309 |
| 8.23615357  | 5.59719332  | 2.75910422 |
| 3.24625357  | 5.59719332  | 2.75910422 |
| 5.72548353  | 11.29866287 | 2.69921895 |
| 0.73558353  | 11.29866287 | 2.69921895 |
| 5.02271343  | 8.84247544  | 2.64073298 |
| 0.03281343  | 8.84247544  | 2.64073298 |
| 7.16234573  | 1.15467185  | 2.58495906 |
| 2.17244573  | 1.15467185  | 2.58495906 |
| 5.69094282  | 6.28061655  | 2.47308962 |
| 0.70104282  | 6.28061655  | 2.47308962 |
| 4.72644856  | 4.52631212  | 0.98044427 |
| -0.26345145 | 4.52631212  | 0.98044427 |
| 8.98416265  | 2.08401219  | 0.94984236 |
| 3.99426265  | 2.08401219  | 0.94984236 |
| 7.49692293  | 12.16127468 | 0.88189072 |
| 2.50702293  | 12.16127468 | 0.88189072 |
| 8.92881242  | 7.14167817  | 0.77916237 |
| 3.93891242  | 7.14167817  | 0.77916237 |
| 8.23179647  | 9.65808525  | 0.74752367 |
| 3.24189647  | 9.65808525  | 0.74752367 |
| 6.50168782  | 2.71004334  | 0.73384591 |
| 1.51178782  | 2.71004334  | 0.73384591 |
| 5.78449336  | 0.24636792  | 0.66762456 |
| 0.79459336  | 0.24636792  | 0.66762456 |
| 6.40908241  | 7.83185195  | 0.60482946 |
| 1.41918241  | 7.83185195  | 0.60482946 |
| 7.18588982  | 5.31081574  | 0.60368013 |
| 2.19598981  | 5.31081574  | 0.60368013 |
| 5.68450729  | 10.28863881 | 0.50651002 |
| 0.69460729  | 10.28863881 | 0.50651002 |

# TS for OH+OH->H<sub>2</sub>O+O

1.000000000000

|             |             |             |    |
|-------------|-------------|-------------|----|
| 9.97980000  | 0.00000000  | 0.00000000  |    |
| -0.76395804 | 12.66177393 | 0.00000000  |    |
| 0.00000004  | 0.00000004  | 19.64040000 |    |
| H           | C           | O           | Fe |
| 3           | 40          | 6           | 80 |

Cart

|             |             |            |
|-------------|-------------|------------|
| 6.36115178  | 11.82993910 | 9.08417231 |
| 8.01590766  | 0.81291283  | 9.66944882 |
| 1.24395750  | 11.31058505 | 7.95998288 |
| 4.17389503  | 9.25635533  | 7.34634255 |
| 4.63433296  | 2.64423805  | 8.22286011 |
| 1.94945375  | 7.35626174  | 8.44285154 |
| 9.65228377  | 2.67147774  | 8.21312512 |
| 6.77101388  | 7.49156841  | 8.39010988 |
| 9.15289204  | 9.30306128  | 7.38238586 |
| 2.19954118  | 4.26034830  | 7.19599376 |
| 7.19076214  | 4.25006607  | 7.20057944 |
| 3.46422955  | 11.94442682 | 7.20233648 |
| 8.44948910  | 11.96356043 | 7.14710261 |
| -0.33368127 | 6.75696996  | 6.30235740 |
| 4.66323798  | 6.73461198  | 6.26393602 |
| 1.76288917  | 1.62687728  | 6.16470793 |
| 6.72681886  | 1.61241437  | 6.11462406 |
| 2.17085804  | 8.28125780  | 5.58115759 |
| 7.15741642  | 8.26962201  | 5.57099016 |
| 9.20523012  | 3.13076974  | 5.28230217 |
| 4.20687173  | 3.13422865  | 5.28918712 |
| 4.67809076  | 10.78538420 | 4.25163304 |
| -0.32642878 | 10.79759484 | 4.26771371 |
| 6.72497587  | 5.68905490  | 4.00893473 |
| 1.73211851  | 5.69293690  | 4.01084762 |
| 7.17827565  | 12.34591318 | 3.65519366 |
| 2.20333963  | 12.34323283 | 3.64963424 |
| 9.22770022  | 7.20040150  | 3.32814212 |
| 4.23607390  | 7.20227694  | 3.31910724 |
| 5.47292217  | 2.23055554  | 2.34193027 |
| 0.48302217  | 2.23055554  | 2.34193027 |
| 6.73540357  | 9.72874639  | 2.00704745 |
| 1.74550357  | 9.72874639  | 2.00704745 |
| 7.98876734  | 3.77819959  | 1.47019894 |
| 2.99886734  | 3.77819959  | 1.47019894 |
| 9.21347812  | 11.29064837 | 1.28800348 |
| 4.22357812  | 11.29064837 | 1.28800348 |

|             |             |            |
|-------------|-------------|------------|
| 5.52626486  | 6.13002817  | 0.45987182 |
| 0.53636486  | 6.13002817  | 0.45987182 |
| 7.45328915  | 1.12937154  | 0.40848067 |
| 2.46338915  | 1.12937154  | 0.40848067 |
| 4.75647854  | 8.73880611  | 0.18583303 |
| -0.23342146 | 8.73880611  | 0.18583303 |
| 7.27439542  | 0.44810633  | 9.14968653 |
| 6.20861742  | 10.83334969 | 8.53761275 |
| 6.56483621  | 7.26754467  | 9.54392132 |
| 4.72642420  | 2.48561288  | 9.40020398 |
| 1.61304986  | 7.19295833  | 9.57150233 |
| 9.70452409  | 2.45058796  | 9.39001353 |
| 2.51722693  | 10.26879974 | 7.16767154 |
| 0.01223855  | 10.91230229 | 6.89395874 |
| 3.17246024  | 7.74984921  | 7.12487180 |
| 8.16074955  | 7.77366522  | 7.12197363 |
| 0.68844565  | 12.41170633 | 4.89134630 |
| 7.57810995  | 0.28035907  | 7.24461463 |
| 3.86759905  | 5.16883413  | 7.01393393 |
| 8.85887749  | 5.17248272  | 7.01139839 |
| 3.21899960  | 2.72600097  | 6.91309034 |
| 8.21971689  | 2.73308742  | 6.90719994 |
| 0.69755443  | 8.32820699  | 6.94688216 |
| 5.68417175  | 8.26086580  | 6.90864180 |
| 4.99777662  | 10.89682199 | 7.07867376 |
| 7.54624514  | 10.32170646 | 7.32294358 |
| 1.38037709  | 5.90328400  | 6.81802673 |
| 6.37747317  | 5.87890207  | 6.78272284 |
| 0.70339826  | 3.28701456  | 6.73264748 |
| 5.69268842  | 3.27366402  | 6.72118105 |
| 0.03970225  | 0.90102283  | 6.66947076 |
| 5.00419498  | 0.89387393  | 6.68866339 |
| 3.26668448  | 11.74160844 | 5.19743830 |
| 8.22354347  | 11.74574601 | 5.20563903 |
| 8.87508926  | 9.24902438  | 5.15052697 |
| 3.89740251  | 9.24522727  | 5.14725880 |
| 7.51147062  | 4.22607315  | 5.03931541 |
| 2.51744721  | 4.23206822  | 5.04341277 |
| 8.20483364  | 6.75899765  | 4.90860356 |
| 3.20869989  | 6.76151403  | 4.90030502 |
| 5.68480388  | 12.39751363 | 4.94737419 |
| 2.54087047  | 0.07783529  | 7.04534423 |
| 3.24309649  | 1.45812262  | 4.84226525 |
| 8.23253458  | 1.45435682  | 4.84456124 |

|             |             |            |
|-------------|-------------|------------|
| 1.40110094  | 9.89062436  | 4.82339888 |
| 6.38671311  | 9.91813813  | 4.89858850 |
| 5.01353966  | 4.85677375  | 4.74307118 |
| 0.02561082  | 4.85921342  | 4.74272316 |
| 0.72565455  | 7.28989994  | 4.70570247 |
| 5.72327480  | 7.28216780  | 4.67906797 |
| 5.74833503  | 2.18933695  | 4.49711250 |
| 0.76852924  | 2.18686420  | 4.50792009 |
| 8.92724451  | 3.16928099  | 3.13275412 |
| 3.93734451  | 3.16928099  | 3.13275412 |
| 9.65447774  | 0.51179240  | 2.92767386 |
| 4.66457774  | 0.51179240  | 2.92767386 |
| 8.19081638  | 10.75315178 | 2.92137328 |
| 3.20091637  | 10.75315178 | 2.92137328 |
| 7.52427827  | 8.16568472  | 2.89047266 |
| 2.53437827  | 8.16568472  | 2.89047266 |
| 6.46140326  | 3.88992115  | 2.81003309 |
| 1.47150326  | 3.88992115  | 2.81003309 |
| 8.23615357  | 5.59719332  | 2.75910422 |
| 3.24625357  | 5.59719332  | 2.75910422 |
| 5.72548353  | 11.29866287 | 2.69921895 |
| 0.73558353  | 11.29866287 | 2.69921895 |
| 5.02271343  | 8.84247544  | 2.64073298 |
| 0.03281343  | 8.84247544  | 2.64073298 |
| 7.16234573  | 1.15467185  | 2.58495906 |
| 2.17244573  | 1.15467185  | 2.58495906 |
| 5.69094282  | 6.28061655  | 2.47308962 |
| 0.70104282  | 6.28061655  | 2.47308962 |
| 4.72644856  | 4.52631212  | 0.98044427 |
| -0.26345145 | 4.52631212  | 0.98044427 |
| 8.98416265  | 2.08401219  | 0.94984236 |
| 3.99426265  | 2.08401219  | 0.94984236 |
| 7.49692293  | 12.16127468 | 0.88189072 |
| 2.50702293  | 12.16127468 | 0.88189072 |
| 8.92881242  | 7.14167817  | 0.77916237 |
| 3.93891242  | 7.14167817  | 0.77916237 |
| 8.23179647  | 9.65808525  | 0.74752367 |
| 3.24189647  | 9.65808525  | 0.74752367 |
| 6.50168782  | 2.71004334  | 0.73384591 |
| 1.51178782  | 2.71004334  | 0.73384591 |
| 5.78449336  | 0.24636792  | 0.66762456 |
| 0.79459336  | 0.24636792  | 0.66762456 |
| 6.40908241  | 7.83185195  | 0.60482946 |
| 1.41918241  | 7.83185195  | 0.60482946 |

|            |             |            |
|------------|-------------|------------|
| 7.18588982 | 5.31081574  | 0.60368013 |
| 2.19598981 | 5.31081574  | 0.60368013 |
| 5.68450729 | 10.28863881 | 0.50651002 |
| 0.69460729 | 10.28863881 | 0.50651002 |

# H<sub>2</sub>O+O

1.000000000000

|             |             |             |    |
|-------------|-------------|-------------|----|
| 9.97980000  | 0.00000000  | 0.00000000  |    |
| -0.76395804 | 12.66177393 | 0.00000000  |    |
| 0.00000004  | 0.00000004  | 19.64040000 |    |
| H           | C           | O           | Fe |
| 3           | 40          | 6           | 80 |

Cart

|             |             |            |
|-------------|-------------|------------|
| 7.51426996  | 0.03075953  | 9.98910296 |
| 8.27810513  | 1.40267791  | 9.67280513 |
| 1.24611123  | 11.31682472 | 7.95753200 |
| 4.19276145  | 9.27526561  | 7.37070214 |
| 4.60398147  | 2.61332845  | 8.22530927 |
| 2.00661117  | 7.33956825  | 8.46404922 |
| 9.59458102  | 2.73162601  | 8.20476477 |
| 6.76469579  | 7.54529585  | 8.39305476 |
| 9.15510229  | 9.31823494  | 7.36947935 |
| 2.19742080  | 4.26714728  | 7.20723001 |
| 7.18526803  | 4.24980509  | 7.18912444 |
| 3.44432108  | 11.94945053 | 7.17706314 |
| 8.49125496  | 11.98989002 | 7.13434262 |
| -0.32852702 | 6.75441120  | 6.31663411 |
| 4.67165777  | 6.74666178  | 6.27194459 |
| 1.74731736  | 1.63901091  | 6.16485317 |
| 6.74657570  | 1.55286705  | 6.18282680 |
| 2.18037800  | 8.28699939  | 5.59087496 |
| 7.16623061  | 8.27180668  | 5.56375845 |
| 9.19684873  | 3.12794692  | 5.27617494 |
| 4.20970460  | 3.13689480  | 5.29764806 |
| 4.67671760  | 10.78935499 | 4.25268654 |
| -0.31971875 | 10.80249966 | 4.27053699 |
| 6.72541161  | 5.69256851  | 4.00805017 |
| 1.73464842  | 5.69771990  | 4.01191093 |
| 7.17871035  | 12.34467829 | 3.65319406 |
| 2.20051627  | 12.34630210 | 3.64023277 |
| 9.23013973  | 7.20059391  | 3.33244008 |
| 4.23760740  | 7.20208934  | 3.32198302 |
| 5.47292217  | 2.23055554  | 2.34193027 |

|             |             |            |
|-------------|-------------|------------|
| 0.48302217  | 2.23055554  | 2.34193027 |
| 6.73540357  | 9.72874639  | 2.00704745 |
| 1.74550357  | 9.72874639  | 2.00704745 |
| 7.98876734  | 3.77819959  | 1.47019894 |
| 2.99886734  | 3.77819959  | 1.47019894 |
| 9.21347812  | 11.29064837 | 1.28800348 |
| 4.22357812  | 11.29064837 | 1.28800348 |
| 5.52626486  | 6.13002817  | 0.45987182 |
| 0.53636486  | 6.13002817  | 0.45987182 |
| 7.45328915  | 1.12937154  | 0.40848067 |
| 2.46338915  | 1.12937154  | 0.40848067 |
| 4.75647854  | 8.73880611  | 0.18583303 |
| -0.23342146 | 8.73880611  | 0.18583303 |
| 7.53184360  | 0.80883774  | 9.40272777 |
| 6.21594370  | 11.16629335 | 8.31205423 |
| 6.59601239  | 7.31547507  | 9.55129512 |
| 4.69535637  | 2.42897048  | 9.40115820 |
| 1.65445899  | 7.18576409  | 9.58904261 |
| 9.60828191  | 2.55344071  | 9.40229018 |
| 2.51877709  | 10.26669022 | 7.16598730 |
| 0.02859236  | 10.91823853 | 6.87546127 |
| 3.18972446  | 7.76110370  | 7.13417017 |
| 8.17193618  | 7.78509759  | 7.11811492 |
| 0.68893894  | 12.42569110 | 4.88192191 |
| 7.53472349  | 0.15826711  | 7.37317915 |
| 3.86968312  | 5.17484185  | 7.01350868 |
| 8.85912806  | 5.16458596  | 7.01120732 |
| 3.20786279  | 2.72961417  | 6.91563588 |
| 8.19399165  | 2.71636170  | 6.88756221 |
| 0.70408936  | 8.33930886  | 6.94561817 |
| 5.69886402  | 8.28429428  | 6.91397535 |
| 4.96930858  | 10.91209609 | 7.02313786 |
| 7.55327803  | 10.35006548 | 7.28169038 |
| 1.39092900  | 5.91535727  | 6.83084177 |
| 6.38068947  | 5.88777763  | 6.78837048 |
| 0.69235473  | 3.30079545  | 6.75051688 |
| 5.68511662  | 3.26600454  | 6.73915907 |
| 0.02156274  | 0.92553606  | 6.65125916 |
| 4.98625179  | 0.90338407  | 6.67455977 |
| 3.26078832  | 11.75229487 | 5.18459574 |
| 8.23666464  | 11.75842236 | 5.19677816 |
| 8.88115322  | 9.25144567  | 5.14592693 |
| 3.90411168  | 9.24881045  | 5.14615194 |
| 7.51096142  | 4.23429099  | 5.03930437 |

|             |             |            |
|-------------|-------------|------------|
| 2.51879456  | 4.24004285  | 5.04691227 |
| 8.20861714  | 6.75831983  | 4.91193677 |
| 3.21266330  | 6.76748639  | 4.90511907 |
| 5.68573913  | 12.40051624 | 4.95140834 |
| 2.52877497  | 0.09166029  | 7.04372081 |
| 3.24039073  | 1.46903009  | 4.84199940 |
| 8.21938185  | 1.45032577  | 4.83889702 |
| 1.40752151  | 9.89150710  | 4.81675607 |
| 6.39303746  | 9.91728789  | 4.88389082 |
| 5.01602109  | 4.85582071  | 4.74470064 |
| 0.02931549  | 4.86028667  | 4.74981089 |
| 0.72957961  | 7.29307828  | 4.71041803 |
| 5.72414864  | 7.28309409  | 4.68415761 |
| 5.76071672  | 2.18775509  | 4.51836390 |
| 0.76649282  | 2.19843292  | 4.51369261 |
| 8.92724451  | 3.16928099  | 3.13275412 |
| 3.93734451  | 3.16928099  | 3.13275412 |
| 9.65447774  | 0.51179240  | 2.92767386 |
| 4.66457774  | 0.51179240  | 2.92767386 |
| 8.19081638  | 10.75315178 | 2.92137328 |
| 3.20091637  | 10.75315178 | 2.92137328 |
| 7.52427827  | 8.16568472  | 2.89047266 |
| 2.53437827  | 8.16568472  | 2.89047266 |
| 6.46140326  | 3.88992115  | 2.81003309 |
| 1.47150326  | 3.88992115  | 2.81003309 |
| 8.23615357  | 5.59719332  | 2.75910422 |
| 3.24625357  | 5.59719332  | 2.75910422 |
| 5.72548353  | 11.29866287 | 2.69921895 |
| 0.73558353  | 11.29866287 | 2.69921895 |
| 5.02271343  | 8.84247544  | 2.64073298 |
| 0.03281343  | 8.84247544  | 2.64073298 |
| 7.16234573  | 1.15467185  | 2.58495906 |
| 2.17244573  | 1.15467185  | 2.58495906 |
| 5.69094282  | 6.28061655  | 2.47308962 |
| 0.70104282  | 6.28061655  | 2.47308962 |
| 4.72644856  | 4.52631212  | 0.98044427 |
| -0.26345145 | 4.52631212  | 0.98044427 |
| 8.98416265  | 2.08401219  | 0.94984236 |
| 3.99426265  | 2.08401219  | 0.94984236 |
| 7.49692293  | 12.16127468 | 0.88189072 |
| 2.50702293  | 12.16127468 | 0.88189072 |
| 8.92881242  | 7.14167817  | 0.77916237 |
| 3.93891242  | 7.14167817  | 0.77916237 |
| 8.23179647  | 9.65808525  | 0.74752367 |

|            |             |            |
|------------|-------------|------------|
| 3.24189647 | 9.65808525  | 0.74752367 |
| 6.50168782 | 2.71004334  | 0.73384591 |
| 1.51178782 | 2.71004334  | 0.73384591 |
| 5.78449336 | 0.24636792  | 0.66762456 |
| 0.79459336 | 0.24636792  | 0.66762456 |
| 6.40908241 | 7.83185195  | 0.60482946 |
| 1.41918241 | 7.83185195  | 0.60482946 |
| 7.18588982 | 5.31081574  | 0.60368013 |
| 2.19598981 | 5.31081574  | 0.60368013 |
| 5.68450729 | 10.28863881 | 0.50651002 |
| 0.69460729 | 10.28863881 | 0.50651002 |

# CO+O (state1)

1.000000000000

|             |             |             |    |
|-------------|-------------|-------------|----|
| 9.97980022  | 0.00000000  | 0.00000000  |    |
| -0.76395801 | 12.66177369 | 0.00000000  |    |
| 0.00000004  | 0.00000004  | 19.64039993 |    |
| H           | C           | O           | Fe |
| 1           | 41          | 6           | 80 |

Cart

|             |             |            |
|-------------|-------------|------------|
| 1.22498414  | 11.39373418 | 7.89332442 |
| 4.18636061  | 9.30687325  | 7.34716863 |
| 2.41178374  | 0.78607635  | 8.91711172 |
| 8.93130413  | 2.35542887  | 8.55453064 |
| 2.12838061  | 7.39453918  | 8.57395673 |
| 6.72680256  | 7.54920426  | 8.39577419 |
| 4.67453120  | 2.97837778  | 8.27085361 |
| 9.13541201  | 9.32450333  | 7.40988060 |
| 2.20739799  | 4.28791918  | 7.17103334 |
| 7.20324272  | 4.26938067  | 7.15851626 |
| 3.39687951  | 11.97287379 | 7.17273127 |
| 8.50138357  | 11.98819248 | 7.11887903 |
| 1.76370907  | 1.57780382  | 6.14983422 |
| 4.66293938  | 6.77844363  | 6.27922381 |
| -0.34126321 | 6.78263389  | 6.32198273 |
| 6.71759331  | 1.62586916  | 6.14526122 |
| 2.16442489  | 8.28815635  | 5.59545772 |
| 7.15645223  | 8.27918815  | 5.57501425 |
| 9.20871624  | 3.12784823  | 5.28442453 |
| 4.20720770  | 3.12619066  | 5.28839794 |
| 4.67014308  | 10.78397086 | 4.25029692 |
| -0.31440169 | 10.81862562 | 4.28140502 |
| 6.72480406  | 5.67971610  | 4.01660035 |



|             |             |             |
|-------------|-------------|-------------|
| 1.73340867  | 5.69626301  | 4.01374235  |
| 7.17656094  | 12.35583479 | 3.63895990  |
| 2.19792770  | 12.35447640 | 3.64745007  |
| 9.22732124  | 7.20088925  | 3.33309401  |
| 4.23814919  | 7.20236320  | 3.32580601  |
| 5.47292232  | 2.23055553  | 2.34193015  |
| 0.48302215  | 2.23055553  | 2.34193015  |
| 6.73540354  | 9.72874641  | 2.00704742  |
| 1.74550355  | 9.72874641  | 2.00704742  |
| 7.98876715  | 3.77819967  | 1.47019899  |
| 2.99886727  | 3.77819967  | 1.47019899  |
| 9.21347809  | 11.29064846 | 1.28800344  |
| 4.22357798  | 11.29064846 | 1.28800344  |
| 5.52626467  | 6.13002825  | 0.45987183  |
| 0.53636485  | 6.13002825  | 0.45987183  |
| 7.45328903  | 1.12937152  | 0.40848067  |
| 2.46338916  | 1.12937152  | 0.40848067  |
| 4.75647831  | 8.73880577  | 0.18583304  |
| -0.23342146 | 8.73880577  | 0.18583304  |
| 6.21240796  | 11.38921387 | 8.23618288  |
| 4.75789549  | 2.93838979  | 9.45812385  |
| 2.31250379  | 1.14929386  | 10.01691373 |
| 1.68284811  | 7.22636866  | 9.65401062  |
| 6.57629973  | 7.28117123  | 9.54795581  |
| 9.37532258  | 2.20508923  | 9.62725121  |
| 2.49108105  | 10.27265150 | 7.13120756  |
| -0.00401314 | 10.89023698 | 6.82182828  |
| 3.17093325  | 7.77802680  | 7.15570064  |
| 8.16182936  | 7.80382284  | 7.12802956  |
| 0.69505387  | 12.43070407 | 4.90016321  |
| 7.54245768  | 0.16639770  | 7.13617151  |
| 3.88020882  | 5.19440123  | 7.00976183  |
| 8.87589882  | 5.16809208  | 6.97538533  |
| 3.20897043  | 2.74052887  | 6.94686169  |
| 8.20512522  | 2.71011057  | 6.97317449  |
| 0.67786744  | 8.36439561  | 6.92422113  |
| 5.69556279  | 8.30397851  | 6.92425386  |
| 4.94400930  | 10.95103842 | 7.00585622  |
| 7.52640134  | 10.35615249 | 7.29436526  |
| 1.38269284  | 5.91929107  | 6.78737473  |
| 6.38176501  | 5.90319063  | 6.76245212  |
| 0.71445491  | 3.32246064  | 6.65768962  |
| 5.67440859  | 3.32159412  | 6.70519155  |
| 0.00112894  | 0.93351470  | 6.62196865  |

|             |             |            |
|-------------|-------------|------------|
| 4.98720105  | 0.90729150  | 6.63577129 |
| 3.24584129  | 11.75535215 | 5.19362192 |
| 8.22989960  | 11.77792857 | 5.17577815 |
| 8.86831653  | 9.24851581  | 5.12149095 |
| 3.89439804  | 9.24519579  | 5.15537628 |
| 7.51508012  | 4.18720223  | 5.05597191 |
| 2.52788202  | 4.22634729  | 5.05226304 |
| 8.19992030  | 6.75349703  | 4.91811172 |
| 3.21251916  | 6.76838754  | 4.91368904 |
| 5.67690569  | 12.40186391 | 4.91954025 |
| 2.54503635  | 0.18077529  | 7.25401159 |
| 3.25226022  | 1.46097252  | 4.86102547 |
| 8.20109665  | 1.49741162  | 4.83595567 |
| 1.40577928  | 9.88771837  | 4.79464821 |
| 6.38926775  | 9.91878733  | 4.88153075 |
| 5.01463847  | 4.85944109  | 4.73470151 |
| 0.02181436  | 4.86108320  | 4.70951103 |
| 0.72541266  | 7.29207856  | 4.70568938 |
| 5.72229615  | 7.28514958  | 4.68829150 |
| 5.75402484  | 2.19414185  | 4.49954661 |
| 0.77262069  | 2.20285975  | 4.49125962 |
| 8.92724419  | 3.16928101  | 3.13275409 |
| 3.93734455  | 3.16928101  | 3.13275409 |
| 9.65447807  | 0.51179242  | 2.92767382 |
| 4.66457796  | 0.51179242  | 2.92767382 |
| 8.19081593  | 10.75315189 | 2.92137337 |
| 3.20091629  | 10.75315189 | 2.92137337 |
| 7.52427816  | 8.16568470  | 2.89047265 |
| 2.53437829  | 8.16568470  | 2.89047265 |
| 6.46140337  | 3.88992119  | 2.81003308 |
| 1.47150326  | 3.88992119  | 2.81003308 |
| 8.23615360  | 5.59719324  | 2.75910425 |
| 3.24625349  | 5.59719324  | 2.75910425 |
| 5.72548342  | 11.29866314 | 2.69921899 |
| 0.73558354  | 11.29866314 | 2.69921899 |
| 5.02271366  | 8.84247589  | 2.64073300 |
| 0.03281343  | 8.84247589  | 2.64073300 |
| 7.16234589  | 1.15467191  | 2.58495903 |
| 2.17244577  | 1.15467191  | 2.58495903 |
| 5.69094276  | 6.28061676  | 2.47308970 |
| 0.70104283  | 6.28061676  | 2.47308970 |
| 4.72644854  | 4.52631235  | 0.98044425 |
| -0.26345146 | 4.52631235  | 0.98044425 |
| 8.98416233  | 2.08401227  | 0.94984233 |

|            |             |            |
|------------|-------------|------------|
| 3.99426270 | 2.08401227  | 0.94984233 |
| 7.49692297 | 12.16127491 | 0.88189071 |
| 2.50702286 | 12.16127491 | 0.88189071 |
| 8.92881203 | 7.14167833  | 0.77916235 |
| 3.93891239 | 7.14167833  | 0.77916235 |
| 8.23179626 | 9.65808487  | 0.74752367 |
| 3.24189639 | 9.65808487  | 0.74752367 |
| 6.50168800 | 2.71004343  | 0.73384589 |
| 1.51178777 | 2.71004343  | 0.73384589 |
| 5.78449345 | 0.24636792  | 0.66762453 |
| 0.79459333 | 0.24636792  | 0.66762453 |
| 6.40908241 | 7.83185196  | 0.60482943 |
| 1.41918242 | 7.83185196  | 0.60482943 |
| 7.18588972 | 5.31081581  | 0.60368013 |
| 2.19598985 | 5.31081581  | 0.60368013 |
| 5.68450737 | 10.28863907 | 0.50651002 |
| 0.69460732 | 10.28863907 | 0.50651002 |

# CO+O (state2)

1.000000000000

|             |             |             |    |
|-------------|-------------|-------------|----|
| 9.97980000  | 0.00000000  | 0.00000000  |    |
| -0.76395804 | 12.66177393 | 0.00000000  |    |
| 0.00000004  | 0.00000004  | 19.64040000 |    |
| H           | C           | O           | Fe |
| 1           | 41          | 6           | 80 |

Cart

|             |             |            |
|-------------|-------------|------------|
| 1.20663246  | 11.31999815 | 7.95411387 |
| 4.17940657  | 9.29616732  | 7.36537716 |
| 4.61726378  | 2.80114819  | 8.24901817 |
| 9.73174696  | 3.16059701  | 8.30256662 |
| 1.79160206  | 7.50809112  | 8.41046117 |
| 7.72888099  | 1.13097376  | 8.85252100 |
| 6.72231550  | 7.51842701  | 8.39032412 |
| 9.13235896  | 9.33245250  | 7.36887938 |
| 2.21223014  | 4.29639240  | 7.15186658 |
| 7.17965075  | 4.26047354  | 7.19249172 |
| 3.42509358  | 11.96357055 | 7.18658677 |
| 8.48006970  | 12.00456323 | 7.12983409 |
| -0.35653879 | 6.77973378  | 6.31826087 |
| 4.64849589  | 6.77055297  | 6.28630069 |
| 1.75584291  | 1.66165111  | 6.17108493 |
| 6.74598243  | 1.54357232  | 6.17116928 |
| 2.16131234  | 8.28395528  | 5.59353996 |

|             |             |            |
|-------------|-------------|------------|
| 7.14394326  | 8.27403243  | 5.57934459 |
| 9.19748974  | 3.11076621  | 5.31280668 |
| 4.21106888  | 3.12265582  | 5.29000489 |
| 4.66895608  | 10.79974875 | 4.25356070 |
| -0.32162628 | 10.79353561 | 4.26408362 |
| 6.72175532  | 5.67544928  | 4.01656397 |
| 1.72809487  | 5.69890997  | 4.01397550 |
| 7.17826164  | 12.36051796 | 3.65489721 |
| 2.19583891  | 12.34812903 | 3.63461045 |
| 9.22541240  | 7.20021751  | 3.33580520 |
| 4.23648391  | 7.20114012  | 3.32458172 |
| 5.47292217  | 2.23055554  | 2.34193027 |
| 0.48302217  | 2.23055554  | 2.34193027 |
| 6.73540357  | 9.72874639  | 2.00704745 |
| 1.74550357  | 9.72874639  | 2.00704745 |
| 7.98876734  | 3.77819959  | 1.47019894 |
| 2.99886734  | 3.77819959  | 1.47019894 |
| 9.21347812  | 11.29064837 | 1.28800348 |
| 4.22357812  | 11.29064837 | 1.28800348 |
| 5.52626486  | 6.13002817  | 0.45987182 |
| 0.53636486  | 6.13002817  | 0.45987182 |
| 7.45328915  | 1.12937154  | 0.40848067 |
| 2.46338915  | 1.12937154  | 0.40848067 |
| 4.75647854  | 8.73880611  | 0.18583303 |
| -0.23342146 | 8.73880611  | 0.18583303 |
| 6.21161278  | 11.29537628 | 8.25468250 |
| 6.55453564  | 7.25196261  | 9.54073400 |
| 4.65586037  | 2.71884547  | 9.43727678 |
| 1.55994191  | 7.27652783  | 9.55716114 |
| 7.71956369  | 1.51125948  | 9.95273144 |
| -0.11325313 | 3.22740566  | 9.48115425 |
| 2.50700211  | 10.28408084 | 7.17890638 |
| 0.00420051  | 10.91754612 | 6.86869492 |
| 3.15888912  | 7.78656684  | 7.13306496 |
| 8.14417135  | 7.80867706  | 7.12821771 |
| 0.68496725  | 12.41263390 | 4.87539266 |
| 7.57705940  | 0.19705719  | 7.33546015 |
| 3.87795381  | 5.17851030  | 6.99969519 |
| 8.85571945  | 5.16127986  | 6.99875466 |
| 3.21759475  | 2.74434151  | 6.91088684 |
| 8.20849276  | 2.72513347  | 7.00168969 |
| 0.68352210  | 8.34125832  | 6.95441807 |
| 5.67158085  | 8.29347852  | 6.92585744 |
| 4.96755945  | 10.94141096 | 6.99377685 |

|            |             |            |
|------------|-------------|------------|
| 7.50111767 | 10.37469557 | 7.24017932 |
| 1.37311817 | 5.93104709  | 6.78164132 |
| 6.36326292 | 5.89252056  | 6.77789708 |
| 0.70179911 | 3.34330459  | 6.69968927 |
| 5.68387763 | 3.28036643  | 6.72377201 |
| 0.04174560 | 0.91733332  | 6.61568458 |
| 4.98287666 | 0.90657576  | 6.67046280 |
| 3.24371431 | 11.75957337 | 5.18601837 |
| 8.23446689 | 11.76070118 | 5.18184920 |
| 8.85763913 | 9.24072867  | 5.11285297 |
| 3.88770052 | 9.25456615  | 5.13353688 |
| 7.51116872 | 4.19094805  | 5.05880488 |
| 2.51850026 | 4.23102660  | 5.03015114 |
| 8.19404272 | 6.74947702  | 4.92078277 |
| 3.20472044 | 6.76867247  | 4.90875282 |
| 5.67502062 | 12.39163539 | 4.93649029 |
| 2.51253131 | 0.10013899  | 7.04482293 |
| 3.23172693 | 1.46744766  | 4.84183326 |
| 8.21760986 | 1.46496261  | 4.87725780 |
| 1.39854958 | 9.88765591  | 4.82132327 |
| 6.38105642 | 9.91198390  | 4.87982635 |
| 5.01144185 | 4.84976549  | 4.73692700 |
| 0.01588123 | 4.85173767  | 4.72760198 |
| 0.71471036 | 7.29101157  | 4.70761275 |
| 5.71572671 | 7.27757865  | 4.69044695 |
| 5.75635508 | 2.18420987  | 4.50819841 |
| 0.76273110 | 2.18881011  | 4.50124840 |
| 8.92724451 | 3.16928099  | 3.13275412 |
| 3.93734451 | 3.16928099  | 3.13275412 |
| 9.65447774 | 0.51179240  | 2.92767386 |
| 4.66457774 | 0.51179240  | 2.92767386 |
| 8.19081638 | 10.75315178 | 2.92137328 |
| 3.20091637 | 10.75315178 | 2.92137328 |
| 7.52427827 | 8.16568472  | 2.89047266 |
| 2.53437827 | 8.16568472  | 2.89047266 |
| 6.46140326 | 3.88992115  | 2.81003309 |
| 1.47150326 | 3.88992115  | 2.81003309 |
| 8.23615357 | 5.59719332  | 2.75910422 |
| 3.24625357 | 5.59719332  | 2.75910422 |
| 5.72548353 | 11.29866287 | 2.69921895 |
| 0.73558353 | 11.29866287 | 2.69921895 |
| 5.02271343 | 8.84247544  | 2.64073298 |
| 0.03281343 | 8.84247544  | 2.64073298 |
| 7.16234573 | 1.15467185  | 2.58495906 |

|             |             |            |
|-------------|-------------|------------|
| 2.17244573  | 1.15467185  | 2.58495906 |
| 5.69094282  | 6.28061655  | 2.47308962 |
| 0.70104282  | 6.28061655  | 2.47308962 |
| 4.72644856  | 4.52631212  | 0.98044427 |
| -0.26345145 | 4.52631212  | 0.98044427 |
| 8.98416265  | 2.08401219  | 0.94984236 |
| 3.99426265  | 2.08401219  | 0.94984236 |
| 7.49692293  | 12.16127468 | 0.88189072 |
| 2.50702293  | 12.16127468 | 0.88189072 |
| 8.92881242  | 7.14167817  | 0.77916237 |
| 3.93891242  | 7.14167817  | 0.77916237 |
| 8.23179647  | 9.65808525  | 0.74752367 |
| 3.24189647  | 9.65808525  | 0.74752367 |
| 6.50168782  | 2.71004334  | 0.73384591 |
| 1.51178782  | 2.71004334  | 0.73384591 |
| 5.78449336  | 0.24636792  | 0.66762456 |
| 0.79459336  | 0.24636792  | 0.66762456 |
| 6.40908241  | 7.83185195  | 0.60482946 |
| 1.41918241  | 7.83185195  | 0.60482946 |
| 7.18588982  | 5.31081574  | 0.60368013 |
| 2.19598981  | 5.31081574  | 0.60368013 |
| 5.68450729  | 10.28863881 | 0.50651002 |
| 0.69460729  | 10.28863881 | 0.50651002 |

# TS for CO+O->CO<sub>2</sub>

1.000000000000

|             |             |             |    |
|-------------|-------------|-------------|----|
| 9.97980000  | 0.00000000  | 0.00000000  |    |
| -0.76395804 | 12.66177393 | 0.00000000  |    |
| 0.00000004  | 0.00000004  | 19.64040000 |    |
| H           | C           | O           | Fe |
| 1           | 41          | 6           | 80 |

Cart

|            |             |            |
|------------|-------------|------------|
| 1.23217291 | 11.33985421 | 7.96500605 |
| 4.17726359 | 9.28867435  | 7.36550391 |
| 4.62668587 | 2.73406252  | 8.23367277 |
| 9.65257680 | 2.74773042  | 8.23944456 |
| 1.78426149 | 7.53058072  | 8.41421151 |
| 7.16077165 | 0.02027207  | 8.91917758 |
| 6.73780862 | 7.57761337  | 8.40706502 |
| 9.16875346 | 9.31485289  | 7.38432234 |
| 2.20297671 | 4.28453478  | 7.18352793 |
| 7.19402763 | 4.27410687  | 7.19509825 |
| 3.43158518 | 11.97306592 | 7.19282343 |

|             |             |             |
|-------------|-------------|-------------|
| 8.45533630  | 11.99530887 | 7.16869159  |
| -0.34009131 | 6.79039938  | 6.30321147  |
| 4.65124714  | 6.77695483  | 6.28778583  |
| 1.75601272  | 1.64817444  | 6.16451230  |
| 6.74202140  | 1.64351178  | 6.13474515  |
| 2.16682590  | 8.29654109  | 5.58802080  |
| 7.15108430  | 8.28340414  | 5.58391603  |
| 9.20045995  | 3.14107106  | 5.29380506  |
| 4.20975983  | 3.14182677  | 5.28757087  |
| 4.67157517  | 10.80198952 | 4.25431200  |
| -0.32332400 | 10.80973672 | 4.26781840  |
| 6.72438194  | 5.69794274  | 4.01250177  |
| 1.73245491  | 5.70597520  | 4.01266210  |
| 7.17607220  | 12.35381988 | 3.65272198  |
| 2.19702655  | 12.34768667 | 3.64730188  |
| 9.22678653  | 7.20063349  | 3.32919870  |
| 4.23546034  | 7.20066993  | 3.32282698  |
| 5.47292217  | 2.23055554  | 2.34193027  |
| 0.48302217  | 2.23055554  | 2.34193027  |
| 6.73540357  | 9.72874639  | 2.00704745  |
| 1.74550357  | 9.72874639  | 2.00704745  |
| 7.98876734  | 3.77819959  | 1.47019894  |
| 2.99886734  | 3.77819959  | 1.47019894  |
| 9.21347812  | 11.29064837 | 1.28800348  |
| 4.22357812  | 11.29064837 | 1.28800348  |
| 5.52626486  | 6.13002817  | 0.45987182  |
| 0.53636486  | 6.13002817  | 0.45987182  |
| 7.45328915  | 1.12937154  | 0.40848067  |
| 2.46338915  | 1.12937154  | 0.40848067  |
| 4.75647854  | 8.73880611  | 0.18583303  |
| -0.23342146 | 8.73880611  | 0.18583303  |
| 6.21325535  | 11.13253870 | 8.47285159  |
| 6.57068911  | 7.32427147  | 9.55897417  |
| 4.72502576  | 2.61760751  | 9.41489201  |
| 1.57736313  | 7.28730691  | 9.56249949  |
| 6.98797833  | 0.32538823  | 10.04416673 |
| 9.76871915  | 2.58451440  | 9.41349034  |
| 2.50968864  | 10.29330093 | 7.18034203  |
| 0.00666632  | 10.93212022 | 6.89683294  |
| 3.16208501  | 7.78753565  | 7.13115360  |
| 8.15368249  | 7.79886436  | 7.13023124  |
| 0.68132081  | 12.42628860 | 4.89077703  |
| 7.55740383  | 0.22325563  | 7.11408013  |
| 3.87149129  | 5.18430848  | 6.99213870  |

|            |             |            |
|------------|-------------|------------|
| 8.85829705 | 5.19084662  | 6.99158211 |
| 3.22145203 | 2.74672271  | 6.91304401 |
| 8.21591449 | 2.74402637  | 6.93026712 |
| 0.70111254 | 8.33406621  | 6.95004503 |
| 5.68140637 | 8.29798518  | 6.92196412 |
| 4.97138998 | 10.93829969 | 7.01607060 |
| 7.55270435 | 10.32265727 | 7.30603497 |
| 1.37495898 | 5.91760085  | 6.78567954 |
| 6.36976443 | 5.90056375  | 6.76798281 |
| 0.70505423 | 3.31158455  | 6.71994732 |
| 5.69329024 | 3.30388041  | 6.71810668 |
| 0.02612381 | 0.92776607  | 6.66944662 |
| 5.02469313 | 0.90978725  | 6.71287357 |
| 3.25459196 | 11.76663045 | 5.19296065 |
| 8.21623020 | 11.75365091 | 5.20162557 |
| 8.87029691 | 9.25593025  | 5.13139877 |
| 3.89561144 | 9.26413200  | 5.14499074 |
| 7.50992739 | 4.22818131  | 5.04066552 |
| 2.51865478 | 4.24072738  | 5.03530359 |
| 8.19681503 | 6.76934149  | 4.91294774 |
| 3.20455665 | 6.77481472  | 4.90849098 |
| 5.66621291 | 12.40912095 | 4.92071578 |
| 2.52360357 | 0.10755418  | 7.05292867 |
| 3.23817843 | 1.47300692  | 4.84428839 |
| 8.23297070 | 1.47017486  | 4.84463609 |
| 1.40044441 | 9.90268958  | 4.82396664 |
| 6.38681789 | 9.91974170  | 4.88203874 |
| 5.01113585 | 4.86234296  | 4.72628935 |
| 0.02184415 | 4.86329412  | 4.72678413 |
| 0.72090764 | 7.30196576  | 4.70203804 |
| 5.71397754 | 7.29356276  | 4.68618083 |
| 5.74924276 | 2.19393672  | 4.50376743 |
| 0.76416299 | 2.19654160  | 4.50549674 |
| 8.92724451 | 3.16928099  | 3.13275412 |
| 3.93734451 | 3.16928099  | 3.13275412 |
| 9.65447774 | 0.51179240  | 2.92767386 |
| 4.66457774 | 0.51179240  | 2.92767386 |
| 8.19081638 | 10.75315178 | 2.92137328 |
| 3.20091637 | 10.75315178 | 2.92137328 |
| 7.52427827 | 8.16568472  | 2.89047266 |
| 2.53437827 | 8.16568472  | 2.89047266 |
| 6.46140326 | 3.88992115  | 2.81003309 |
| 1.47150326 | 3.88992115  | 2.81003309 |
| 8.23615357 | 5.59719332  | 2.75910422 |



|             |             |            |
|-------------|-------------|------------|
| 3.24625357  | 5.59719332  | 2.75910422 |
| 5.72548353  | 11.29866287 | 2.69921895 |
| 0.73558353  | 11.29866287 | 2.69921895 |
| 5.02271343  | 8.84247544  | 2.64073298 |
| 0.03281343  | 8.84247544  | 2.64073298 |
| 7.16234573  | 1.15467185  | 2.58495906 |
| 2.17244573  | 1.15467185  | 2.58495906 |
| 5.69094282  | 6.28061655  | 2.47308962 |
| 0.70104282  | 6.28061655  | 2.47308962 |
| 4.72644856  | 4.52631212  | 0.98044427 |
| -0.26345145 | 4.52631212  | 0.98044427 |
| 8.98416265  | 2.08401219  | 0.94984236 |
| 3.99426265  | 2.08401219  | 0.94984236 |
| 7.49692293  | 12.16127468 | 0.88189072 |
| 2.50702293  | 12.16127468 | 0.88189072 |
| 8.92881242  | 7.14167817  | 0.77916237 |
| 3.93891242  | 7.14167817  | 0.77916237 |
| 8.23179647  | 9.65808525  | 0.74752367 |
| 3.24189647  | 9.65808525  | 0.74752367 |
| 6.50168782  | 2.71004334  | 0.73384591 |
| 1.51178782  | 2.71004334  | 0.73384591 |
| 5.78449336  | 0.24636792  | 0.66762456 |
| 0.79459336  | 0.24636792  | 0.66762456 |
| 6.40908241  | 7.83185195  | 0.60482946 |
| 1.41918241  | 7.83185195  | 0.60482946 |
| 7.18588982  | 5.31081574  | 0.60368013 |
| 2.19598981  | 5.31081574  | 0.60368013 |
| 5.68450729  | 10.28863881 | 0.50651002 |
| 0.69460729  | 10.28863881 | 0.50651002 |

# CO<sub>2</sub>

1.000000000000

|             |             |             |    |
|-------------|-------------|-------------|----|
| 9.97980000  | 0.00000000  | 0.00000000  |    |
| -0.76395804 | 12.66177393 | 0.00000000  |    |
| 0.00000004  | 0.00000004  | 19.64040000 |    |
| H           | C           | O           | Fe |
| 1           | 41          | 6           | 80 |

Cart

|            |             |            |
|------------|-------------|------------|
| 1.23403015 | 11.32982048 | 7.95541527 |
| 4.18785267 | 9.28549605  | 7.35933880 |
| 4.62478700 | 2.75551048  | 8.24224745 |
| 9.61435787 | 2.59930497  | 8.21824241 |
| 1.79995956 | 7.52917906  | 8.41532139 |

|             |             |            |
|-------------|-------------|------------|
| 6.27459402  | 12.15754540 | 8.84894844 |
| 6.75040007  | 7.54267880  | 8.40015604 |
| 9.16193323  | 9.30976501  | 7.37449278 |
| 2.19584213  | 4.27642051  | 7.18718645 |
| 7.19395891  | 4.26448417  | 7.19856749 |
| 3.44776660  | 11.96262639 | 7.19879912 |
| 8.44369244  | 11.98692487 | 7.19876332 |
| -0.33658417 | 6.78267935  | 6.30241525 |
| 4.65354733  | 6.76461825  | 6.28598689 |
| 1.75295640  | 1.63230251  | 6.17024892 |
| 6.73259280  | 1.63256539  | 6.14950720 |
| 2.16847898  | 8.29445798  | 5.58918724 |
| 7.15654536  | 8.28389490  | 5.58142600 |
| 9.20009081  | 3.14495561  | 5.29571605 |
| 4.20738928  | 3.13935838  | 5.28872786 |
| 4.67779813  | 10.80700187 | 4.25668625 |
| -0.32324249 | 10.81242292 | 4.26867726 |
| 6.72427346  | 5.70085812  | 4.01165149 |
| 1.73220016  | 5.70488732  | 4.01223103 |
| 7.17973328  | 12.35430078 | 3.65437811 |
| 2.19743307  | 12.34535373 | 3.65011189 |
| 9.22772207  | 7.20165299  | 3.32975771 |
| 4.23542656  | 7.20184441  | 3.32524972 |
| 5.47292217  | 2.23055554  | 2.34193027 |
| 0.48302217  | 2.23055554  | 2.34193027 |
| 6.73540357  | 9.72874639  | 2.00704745 |
| 1.74550357  | 9.72874639  | 2.00704745 |
| 7.98876734  | 3.77819959  | 1.47019894 |
| 2.99886734  | 3.77819959  | 1.47019894 |
| 9.21347812  | 11.29064837 | 1.28800348 |
| 4.22357812  | 11.29064837 | 1.28800348 |
| 5.52626486  | 6.13002817  | 0.45987182 |
| 0.53636486  | 6.13002817  | 0.45987182 |
| 7.45328915  | 1.12937154  | 0.40848067 |
| 2.46338915  | 1.12937154  | 0.40848067 |
| 4.75647854  | 8.73880611  | 0.18583303 |
| -0.23342146 | 8.73880611  | 0.18583303 |
| 6.21494646  | 10.81271017 | 8.78202726 |
| 6.56873405  | 7.27934747  | 9.54755214 |
| 4.69457008  | 2.65148217  | 9.42612721 |
| 1.58104650  | 7.30674514  | 9.56463292 |
| 6.86841955  | 0.19841161  | 9.81928031 |
| 9.77930336  | 2.40496748  | 9.38215091 |
| 2.53756577  | 10.28987655 | 7.19128223 |

|             |             |            |
|-------------|-------------|------------|
| -0.00957572 | 10.92531006 | 6.90831164 |
| 3.16713034  | 7.78589569  | 7.12739732 |
| 8.15704474  | 7.79117913  | 7.12825510 |
| 0.68138060  | 12.42115418 | 4.89693353 |
| 7.54631884  | 0.16004791  | 7.07453156 |
| 3.86688206  | 5.17856499  | 6.99456355 |
| 8.85732832  | 5.18134500  | 6.98988714 |
| 3.21590398  | 2.74116819  | 6.91257295 |
| 8.21114899  | 2.73635485  | 6.91637821 |
| 0.70321864  | 8.33255780  | 6.95047911 |
| 5.68275344  | 8.29365980  | 6.91535735 |
| 5.03101406  | 10.94725047 | 7.01673122 |
| 7.51819282  | 10.31403813 | 7.30532261 |
| 1.37361272  | 5.91275188  | 6.79455640 |
| 6.37350044  | 5.89444189  | 6.76957965 |
| 0.70213714  | 3.29250638  | 6.72842479 |
| 5.69005125  | 3.29660630  | 6.72515864 |
| 0.02726693  | 0.91299006  | 6.68464781 |
| 5.01000527  | 0.90277166  | 6.70510435 |
| 3.25820642  | 11.76350736 | 5.19581398 |
| 8.22247269  | 11.75943874 | 5.20701505 |
| 8.87545288  | 9.25484869  | 5.12180969 |
| 3.89509577  | 9.25395949  | 5.12418601 |
| 7.50545346  | 4.23200442  | 5.03321148 |
| 2.51743828  | 4.23843607  | 5.03652729 |
| 8.19998603  | 6.76743479  | 4.91172073 |
| 3.20561768  | 6.76815072  | 4.90989887 |
| 5.67770569  | 12.40984532 | 4.92109124 |
| 2.53140726  | 0.09218367  | 7.05295647 |
| 3.23855529  | 1.46724926  | 4.84656900 |
| 8.21923944  | 1.48804154  | 4.82398222 |
| 1.40352023  | 9.90306327  | 4.83048670 |
| 6.38945947  | 9.91839586  | 4.87981444 |
| 5.01125069  | 4.86131078  | 4.73260583 |
| 0.02324071  | 4.86161989  | 4.73214287 |
| 0.72378035  | 7.30084338  | 4.70229069 |
| 5.71651193  | 7.29387549  | 4.68478650 |
| 5.74624802  | 2.18967404  | 4.50826379 |
| 0.76536803  | 2.19611547  | 4.51005627 |
| 8.92724451  | 3.16928099  | 3.13275412 |
| 3.93734451  | 3.16928099  | 3.13275412 |
| 9.65447774  | 0.51179240  | 2.92767386 |
| 4.66457774  | 0.51179240  | 2.92767386 |
| 8.19081638  | 10.75315178 | 2.92137328 |

|             |             |            |
|-------------|-------------|------------|
| 3.20091637  | 10.75315178 | 2.92137328 |
| 7.52427827  | 8.16568472  | 2.89047266 |
| 2.53437827  | 8.16568472  | 2.89047266 |
| 6.46140326  | 3.88992115  | 2.81003309 |
| 1.47150326  | 3.88992115  | 2.81003309 |
| 8.23615357  | 5.59719332  | 2.75910422 |
| 3.24625357  | 5.59719332  | 2.75910422 |
| 5.72548353  | 11.29866287 | 2.69921895 |
| 0.73558353  | 11.29866287 | 2.69921895 |
| 5.02271343  | 8.84247544  | 2.64073298 |
| 0.03281343  | 8.84247544  | 2.64073298 |
| 7.16234573  | 1.15467185  | 2.58495906 |
| 2.17244573  | 1.15467185  | 2.58495906 |
| 5.69094282  | 6.28061655  | 2.47308962 |
| 0.70104282  | 6.28061655  | 2.47308962 |
| 4.72644856  | 4.52631212  | 0.98044427 |
| -0.26345145 | 4.52631212  | 0.98044427 |
| 8.98416265  | 2.08401219  | 0.94984236 |
| 3.99426265  | 2.08401219  | 0.94984236 |
| 7.49692293  | 12.16127468 | 0.88189072 |
| 2.50702293  | 12.16127468 | 0.88189072 |
| 8.92881242  | 7.14167817  | 0.77916237 |
| 3.93891242  | 7.14167817  | 0.77916237 |
| 8.23179647  | 9.65808525  | 0.74752367 |
| 3.24189647  | 9.65808525  | 0.74752367 |
| 6.50168782  | 2.71004334  | 0.73384591 |
| 1.51178782  | 2.71004334  | 0.73384591 |
| 5.78449336  | 0.24636792  | 0.66762456 |
| 0.79459336  | 0.24636792  | 0.66762456 |
| 6.40908241  | 7.83185195  | 0.60482946 |
| 1.41918241  | 7.83185195  | 0.60482946 |
| 7.18588982  | 5.31081574  | 0.60368013 |
| 2.19598981  | 5.31081574  | 0.60368013 |
| 5.68450729  | 10.28863881 | 0.50651002 |
| 0.69460729  | 10.28863881 | 0.50651002 |

# CO+OH (state1)

1.000000000000

|             |             |             |    |
|-------------|-------------|-------------|----|
| 9.97980022  | 0.00000000  | 0.00000000  |    |
| -0.76395801 | 12.66177369 | 0.00000000  |    |
| 0.00000004  | 0.00000004  | 19.64039993 |    |
| H           | C           | O           | Fe |
| 2           | 41          | 6           | 80 |

Cart

|             |             |            |
|-------------|-------------|------------|
| 4.32016727  | 6.67456447  | 9.28565410 |
| 1.20174563  | 11.33648932 | 7.96371084 |
| 3.42226985  | 11.96313710 | 7.19616037 |
| 7.18147014  | 7.45967704  | 8.59422868 |
| 9.29462125  | 2.38911829  | 8.34828153 |
| 5.96905815  | 11.26349213 | 8.49455383 |
| 4.62511801  | 2.66071793  | 8.22263839 |
| 1.19667923  | 8.14666531  | 8.70226138 |
| 9.15637016  | 9.33481800  | 7.26875385 |
| 2.23832329  | 4.29226692  | 7.12839517 |
| 7.18128250  | 4.26742173  | 7.19146040 |
| 8.44907529  | 11.96899866 | 7.15072049 |
| 7.16886107  | 8.27768292  | 5.53021043 |
| -0.32543463 | 6.79814856  | 6.29696560 |
| 4.69227490  | 6.69719588  | 6.22021599 |
| 1.75113145  | 1.62663731  | 6.18140694 |
| 4.21756071  | 3.13908787  | 5.28249173 |
| 2.16137206  | 8.28992847  | 5.67675063 |
| 4.15816377  | 9.30545991  | 7.32830339 |
| 9.20105788  | 3.14501673  | 5.29634455 |
| 6.71789187  | 1.63959803  | 6.15735247 |
| 4.66669995  | 10.77494396 | 4.26256392 |
| -0.31719165 | 10.80396586 | 4.27413781 |
| 6.71659233  | 5.67043045  | 4.00874217 |
| 1.73888515  | 5.71128609  | 4.03677987 |
| 7.17427426  | 12.35309771 | 3.63660084 |
| 2.19878945  | 12.34585429 | 3.63399973 |
| 9.22705445  | 7.20080811  | 3.31883057 |
| 4.22296947  | 7.20188181  | 3.30736495 |
| 5.47292232  | 2.23055553  | 2.34193015 |
| 0.48302215  | 2.23055553  | 2.34193015 |
| 6.73540354  | 9.72874641  | 2.00704742 |
| 1.74550355  | 9.72874641  | 2.00704742 |
| 7.98876715  | 3.77819967  | 1.47019899 |
| 2.99886727  | 3.77819967  | 1.47019899 |
| 9.21347809  | 11.29064846 | 1.28800344 |
| 4.22357798  | 11.29064846 | 1.28800344 |
| 5.52626467  | 6.13002825  | 0.45987183 |
| 0.53636485  | 6.13002825  | 0.45987183 |
| 7.45328903  | 1.12937152  | 0.40848067 |
| 2.46338916  | 1.12937152  | 0.40848067 |
| 4.75647831  | 8.73880577  | 0.18583304 |
| -0.23342146 | 8.73880577  | 0.18583304 |

|            |             |            |
|------------|-------------|------------|
| 3.53758689 | 6.45708632  | 8.74160993 |
| 1.30395244 | 8.07097383  | 9.86272973 |
| 6.68187493 | 7.32219807  | 9.65736587 |
| 9.76075774 | 2.27813868  | 9.43162923 |
| 6.23941333 | 11.34494934 | 9.64978397 |
| 4.76669516 | 2.48832259  | 9.39652827 |
| 2.51179400 | 10.28239939 | 7.16849939 |
| 0.71836174 | 8.34041746  | 6.99855682 |
| 3.27239595 | 7.70377031  | 7.19514565 |
| 8.15824477 | 7.78601266  | 7.13542491 |
| 0.68705311 | 12.43258688 | 4.87907369 |
| 5.66976599 | 12.40593414 | 4.91870286 |
| 3.21309908 | 2.73514767  | 6.91213455 |
| 8.85263626 | 5.19465512  | 6.96344788 |
| 3.89718294 | 5.22869296  | 7.24864143 |
| 8.20540872 | 2.72931949  | 6.95251106 |
| 0.01178562 | 10.95395027 | 6.84338485 |
| 5.70445911 | 8.35753618  | 6.86216405 |
| 4.99056601 | 10.94466381 | 7.01622627 |
| 7.52355423 | 10.31883702 | 7.17452350 |
| 1.36747398 | 5.87519647  | 6.63602629 |
| 6.41612402 | 5.91114145  | 6.73276487 |
| 0.71148228 | 3.31539088  | 6.70188567 |
| 5.68263827 | 3.28817559  | 6.72248636 |
| 4.98920216 | 0.89660393  | 6.67941873 |
| 8.21747883 | 1.48718285  | 4.84495142 |
| 2.50837026 | 0.09112794  | 7.06526548 |
| 8.23183199 | 11.77753350 | 5.17014590 |
| 8.89151232 | 9.23384600  | 5.14921339 |
| 3.88510355 | 9.23487291  | 5.19277225 |
| 7.51479967 | 4.20345072  | 5.03815425 |
| 2.54195188 | 4.22912199  | 5.03468559 |
| 8.20953938 | 6.74681499  | 4.91405427 |
| 3.19019271 | 6.79850452  | 4.91917584 |
| 5.75036764 | 2.19026415  | 4.50499314 |
| 3.24309565 | 11.75409471 | 5.19048755 |
| 0.01599478 | 0.91400065  | 6.68993175 |
| 7.53619258 | 0.14014621  | 7.08102630 |
| 1.40609340 | 9.88656158  | 4.82424416 |
| 6.39486260 | 9.92422755  | 4.85877283 |
| 5.00239367 | 4.88468787  | 4.77647548 |
| 0.01840606 | 4.85182596  | 4.69156685 |
| 0.71559545 | 7.32843769  | 4.69747976 |
| 5.71956283 | 7.29143372  | 4.66868560 |

|             |             |            |
|-------------|-------------|------------|
| 0.76889225  | 2.20001124  | 4.51373118 |
| 3.23822155  | 1.47239747  | 4.84401970 |
| 8.92724419  | 3.16928101  | 3.13275409 |
| 3.93734455  | 3.16928101  | 3.13275409 |
| 9.65447807  | 0.51179242  | 2.92767382 |
| 4.66457796  | 0.51179242  | 2.92767382 |
| 8.19081593  | 10.75315189 | 2.92137337 |
| 3.20091629  | 10.75315189 | 2.92137337 |
| 7.52427816  | 8.16568470  | 2.89047265 |
| 2.53437829  | 8.16568470  | 2.89047265 |
| 6.46140337  | 3.88992119  | 2.81003308 |
| 1.47150326  | 3.88992119  | 2.81003308 |
| 8.23615360  | 5.59719324  | 2.75910425 |
| 3.24625349  | 5.59719324  | 2.75910425 |
| 5.72548342  | 11.29866314 | 2.69921899 |
| 0.73558354  | 11.29866314 | 2.69921899 |
| 5.02271366  | 8.84247589  | 2.64073300 |
| 0.03281343  | 8.84247589  | 2.64073300 |
| 7.16234589  | 1.15467191  | 2.58495903 |
| 2.17244577  | 1.15467191  | 2.58495903 |
| 5.69094276  | 6.28061676  | 2.47308970 |
| 0.70104283  | 6.28061676  | 2.47308970 |
| 4.72644854  | 4.52631235  | 0.98044425 |
| -0.26345146 | 4.52631235  | 0.98044425 |
| 8.98416233  | 2.08401227  | 0.94984233 |
| 3.99426270  | 2.08401227  | 0.94984233 |
| 7.49692297  | 12.16127491 | 0.88189071 |
| 2.50702286  | 12.16127491 | 0.88189071 |
| 8.92881203  | 7.14167833  | 0.77916235 |
| 3.93891239  | 7.14167833  | 0.77916235 |
| 8.23179626  | 9.65808487  | 0.74752367 |
| 3.24189639  | 9.65808487  | 0.74752367 |
| 6.50168800  | 2.71004343  | 0.73384589 |
| 1.51178777  | 2.71004343  | 0.73384589 |
| 5.78449345  | 0.24636792  | 0.66762453 |
| 0.79459333  | 0.24636792  | 0.66762453 |
| 6.40908241  | 7.83185196  | 0.60482943 |
| 1.41918242  | 7.83185196  | 0.60482943 |
| 7.18588972  | 5.31081581  | 0.60368013 |
| 2.19598985  | 5.31081581  | 0.60368013 |
| 5.68450737  | 10.28863907 | 0.50651002 |
| 0.69460732  | 10.28863907 | 0.50651002 |

# CO+OH (state2)

1.000000000000

|             |             |             |    |
|-------------|-------------|-------------|----|
| 9.97980000  | 0.00000000  | 0.00000000  |    |
| -0.76395804 | 12.66177393 | 0.00000000  |    |
| 0.00000004  | 0.00000004  | 19.64040000 |    |
| H           | C           | O           | Fe |
| 2           | 41          | 6           | 80 |

Cart

|             |             |            |
|-------------|-------------|------------|
| -0.05137516 | 5.83602786  | 9.60389210 |
| 6.22970401  | 11.34794856 | 7.96137995 |
| 4.19453832  | 9.31762949  | 7.35030374 |
| 9.13066370  | 2.22062886  | 8.39880749 |
| 6.73869776  | 7.83412036  | 8.46893073 |
| 1.76065785  | 7.73224818  | 8.43434308 |
| 0.97700923  | 11.36089074 | 8.43221595 |
| 4.58999276  | 2.56268294  | 8.21412085 |
| 9.18254837  | 9.28667301  | 7.35574171 |
| 4.20590208  | 3.13659923  | 5.29639265 |
| 7.25251312  | 4.30228789  | 7.11725607 |
| -0.31615591 | 10.79806821 | 4.26729747 |
| 8.42576226  | 11.92908698 | 7.15528969 |
| -0.37205924 | 6.70806778  | 6.28964804 |
| 4.64718089  | 6.80178382  | 6.30917201 |
| 1.74080590  | 1.59934823  | 6.20400275 |
| 6.72103759  | 1.62771809  | 6.15317295 |
| 2.16716020  | 8.27268233  | 5.56946958 |
| 7.16164101  | 8.27590621  | 5.58163850 |
| 9.20578250  | 3.13813510  | 5.27723525 |
| 2.21969381  | 4.27914890  | 7.19600977 |
| 4.23674200  | 7.20003493  | 3.33026080 |
| 7.18292918  | 12.34741525 | 3.63142242 |
| 6.72681590  | 5.67975581  | 4.02602405 |
| 1.71797068  | 5.67312364  | 4.01336655 |
| 3.47193697  | 11.96918366 | 7.16607859 |
| 2.19021907  | 12.35169368 | 3.64121623 |
| 9.22212075  | 7.19950860  | 3.33138089 |
| 4.67639766  | 10.81057288 | 4.26497160 |
| 5.47292232  | 2.23055553  | 2.34193015 |
| 0.48302215  | 2.23055553  | 2.34193015 |
| 6.73540354  | 9.72874641  | 2.00704742 |
| 1.74550355  | 9.72874641  | 2.00704742 |
| 7.98876715  | 3.77819967  | 1.47019899 |
| 2.99886727  | 3.77819967  | 1.47019899 |
| 9.21347809  | 11.29064846 | 1.28800344 |



|             |             |            |
|-------------|-------------|------------|
| 4.22357798  | 11.29064846 | 1.28800344 |
| 5.52626467  | 6.13002825  | 0.45987183 |
| 0.53636485  | 6.13002825  | 0.45987183 |
| 7.45328903  | 1.12937152  | 0.40848067 |
| 2.46338916  | 1.12937152  | 0.40848067 |
| 4.75647831  | 8.73880577  | 0.18583304 |
| -0.23342146 | 8.73880577  | 0.18583304 |
| 9.23880565  | 5.30962127  | 9.15415795 |
| 4.79708297  | 2.39877617  | 9.37768975 |
| 9.66661542  | 2.01416794  | 9.42818782 |
| 6.61574293  | 7.69899543  | 9.64167004 |
| 1.62539121  | 7.55441590  | 9.60821856 |
| 1.15429244  | 11.42678448 | 9.60727953 |
| 2.54968907  | 10.29939141 | 7.20976578 |
| 0.69938514  | 8.29960761  | 6.91512784 |
| 3.16217722  | 7.81645119  | 7.12572238 |
| 8.14889396  | 7.79446827  | 7.13665765 |
| 2.54844510  | 0.08745420  | 7.09661381 |
| 8.22533766  | 1.48425094  | 4.84036850 |
| 3.87935595  | 5.18643784  | 6.98183738 |
| 8.89094649  | 5.27434790  | 7.40562036 |
| 3.19933802  | 2.72536179  | 6.92260193 |
| 8.20867005  | 2.71402376  | 6.94155648 |
| 0.00878915  | 10.91798690 | 6.94656867 |
| 5.70134188  | 8.34285422  | 6.92656860 |
| 5.01363840  | 10.93776452 | 6.88234202 |
| 7.51691398  | 10.27855901 | 7.19860548 |
| 1.37792934  | 5.90383050  | 6.77502901 |
| 6.34194731  | 5.88496583  | 6.72226735 |
| -0.00155483 | 0.88601566  | 6.68961428 |
| 5.69138102  | 3.31019476  | 6.73935890 |
| 0.68741628  | 12.41221937 | 4.91352766 |
| 5.00536234  | 0.91798511  | 6.69293076 |
| 0.71949293  | 3.30608523  | 6.68096929 |
| 3.24761135  | 11.77200859 | 5.18111287 |
| 5.70607356  | 7.29258794  | 4.69178658 |
| 1.40581379  | 9.90753570  | 4.85800643 |
| 7.54084116  | 4.21930613  | 5.07278265 |
| 2.52202842  | 4.22211274  | 5.04049704 |
| 8.18642840  | 6.75701452  | 4.91414162 |
| 3.20722760  | 6.74421985  | 4.92120670 |
| 5.67697005  | 12.43430491 | 4.89215636 |
| 7.52824998  | 0.12400955  | 7.07281569 |
| 3.22967116  | 1.47106140  | 4.85003574 |

|             |             |            |
|-------------|-------------|------------|
| 8.23673479  | 11.76737536 | 5.17815830 |
| 8.88237406  | 9.23529749  | 5.11946885 |
| 6.39932709  | 9.89938352  | 4.82970907 |
| 5.01885208  | 4.84366778  | 4.72349934 |
| 0.00288767  | 4.87847112  | 4.78009471 |
| 0.72056377  | 7.27190076  | 4.69622178 |
| 3.88367424  | 9.24823408  | 5.10408779 |
| 5.75984333  | 2.21388928  | 4.51722174 |
| 0.76757598  | 2.18904922  | 4.51937233 |
| 8.92724419  | 3.16928101  | 3.13275409 |
| 3.93734455  | 3.16928101  | 3.13275409 |
| 9.65447807  | 0.51179242  | 2.92767382 |
| 4.66457796  | 0.51179242  | 2.92767382 |
| 8.19081593  | 10.75315189 | 2.92137337 |
| 3.20091629  | 10.75315189 | 2.92137337 |
| 7.52427816  | 8.16568470  | 2.89047265 |
| 2.53437829  | 8.16568470  | 2.89047265 |
| 6.46140337  | 3.88992119  | 2.81003308 |
| 1.47150326  | 3.88992119  | 2.81003308 |
| 8.23615360  | 5.59719324  | 2.75910425 |
| 3.24625349  | 5.59719324  | 2.75910425 |
| 5.72548342  | 11.29866314 | 2.69921899 |
| 0.73558354  | 11.29866314 | 2.69921899 |
| 5.02271366  | 8.84247589  | 2.64073300 |
| 0.03281343  | 8.84247589  | 2.64073300 |
| 7.16234589  | 1.15467191  | 2.58495903 |
| 2.17244577  | 1.15467191  | 2.58495903 |
| 5.69094276  | 6.28061676  | 2.47308970 |
| 0.70104283  | 6.28061676  | 2.47308970 |
| 4.72644854  | 4.52631235  | 0.98044425 |
| -0.26345146 | 4.52631235  | 0.98044425 |
| 8.98416233  | 2.08401227  | 0.94984233 |
| 3.99426270  | 2.08401227  | 0.94984233 |
| 7.49692297  | 12.16127491 | 0.88189071 |
| 2.50702286  | 12.16127491 | 0.88189071 |
| 8.92881203  | 7.14167833  | 0.77916235 |
| 3.93891239  | 7.14167833  | 0.77916235 |
| 8.23179626  | 9.65808487  | 0.74752367 |
| 3.24189639  | 9.65808487  | 0.74752367 |
| 6.50168800  | 2.71004343  | 0.73384589 |
| 1.51178777  | 2.71004343  | 0.73384589 |
| 5.78449345  | 0.24636792  | 0.66762453 |
| 0.79459333  | 0.24636792  | 0.66762453 |
| 6.40908241  | 7.83185196  | 0.60482943 |

|            |             |            |
|------------|-------------|------------|
| 1.41918242 | 7.83185196  | 0.60482943 |
| 7.18588972 | 5.31081581  | 0.60368013 |
| 2.19598985 | 5.31081581  | 0.60368013 |
| 5.68450737 | 10.28863907 | 0.50651002 |
| 0.69460732 | 10.28863907 | 0.50651002 |

# TS for CO+OH->COOH

1.000000000000

|             |             |             |    |
|-------------|-------------|-------------|----|
| 9.97980022  | 0.00000000  | 0.00000000  |    |
| -0.76395801 | 12.66177369 | 0.00000000  |    |
| 0.00000004  | 0.00000004  | 19.64039993 |    |
| H           | C           | O           | Fe |
| 2           | 41          | 6           | 80 |

Cart

|             |             |            |
|-------------|-------------|------------|
| 0.09435164  | 4.77861486  | 9.47002762 |
| 6.22982574  | 11.33148355 | 7.97577846 |
| 4.18038318  | 9.30973463  | 7.38909528 |
| 9.29104355  | 2.82288993  | 8.54946445 |
| 6.78838561  | 7.57055434  | 8.42364105 |
| 1.75844120  | 7.51434120  | 8.39364144 |
| 0.97489250  | 11.35250575 | 8.45383745 |
| 4.59737851  | 2.58503346  | 8.21338130 |
| 9.17015510  | 9.29018569  | 7.37214923 |
| 4.21469997  | 3.13854263  | 5.28524127 |
| 7.22084935  | 4.29128698  | 7.12134927 |
| -0.31785046 | 10.80234858 | 4.26403520 |
| 8.42482534  | 11.94870848 | 7.17114045 |
| -0.34722593 | 6.73911331  | 6.25890583 |
| 4.64504179  | 6.79793011  | 6.30257607 |
| 1.74882852  | 1.60755482  | 6.18926224 |
| 6.74590331  | 1.64158095  | 6.17614867 |
| 2.16790036  | 8.29144269  | 5.58266261 |
| 7.15601078  | 8.29004791  | 5.58171652 |
| 9.20779657  | 3.13494522  | 5.27978023 |
| 2.22013987  | 4.28442530  | 7.16781337 |
| 4.23773969  | 7.20025198  | 3.32707984 |
| 7.18368949  | 12.35099165 | 3.63835291 |
| 6.72688075  | 5.69013293  | 4.01910886 |
| 1.72648888  | 5.69346471  | 4.01370474 |
| 3.46487876  | 11.96794328 | 7.16764886 |
| 2.19340436  | 12.34806308 | 3.63970766 |
| 9.22198329  | 7.20066804  | 3.32028416 |
| 4.67376262  | 10.80893018 | 4.26281313 |

|             |             |            |
|-------------|-------------|------------|
| 5.47292232  | 2.23055553  | 2.34193015 |
| 0.48302215  | 2.23055553  | 2.34193015 |
| 6.73540354  | 9.72874641  | 2.00704742 |
| 1.74550355  | 9.72874641  | 2.00704742 |
| 7.98876715  | 3.77819967  | 1.47019899 |
| 2.99886727  | 3.77819967  | 1.47019899 |
| 9.21347809  | 11.29064846 | 1.28800344 |
| 4.22357798  | 11.29064846 | 1.28800344 |
| 5.52626467  | 6.13002825  | 0.45987183 |
| 0.53636485  | 6.13002825  | 0.45987183 |
| 7.45328903  | 1.12937152  | 0.40848067 |
| 2.46338916  | 1.12937152  | 0.40848067 |
| 4.75647831  | 8.73880577  | 0.18583304 |
| -0.23342146 | 8.73880577  | 0.18583304 |
| 9.24694573  | 4.54500823  | 8.99526229 |
| 4.76954431  | 2.42157965  | 9.38338596 |
| -0.05104600 | 2.20496806  | 9.34702683 |
| 6.57561748  | 7.33431937  | 9.57070150 |
| 1.57298644  | 7.23288930  | 9.54128835 |
| 1.17777489  | 11.46422709 | 9.62159145 |
| 2.53807122  | 10.30052092 | 7.20895352 |
| 0.69439600  | 8.30013753  | 6.93270225 |
| 3.16452059  | 7.80111642  | 7.13191256 |
| 8.15138074  | 7.79010240  | 7.12395411 |
| 2.54435116  | 0.09499619  | 7.08744288 |
| 8.22477472  | 1.48606202  | 4.85230906 |
| 3.88907417  | 5.18169425  | 6.98141985 |
| 8.88245099  | 5.26493896  | 7.22017863 |
| 3.21031724  | 2.72964802  | 6.90891670 |
| 8.24333407  | 2.73914438  | 6.94870582 |
| 0.00301451  | 10.92391824 | 6.97522570 |
| 5.69309324  | 8.33217695  | 6.94575240 |
| 5.00113502  | 10.92234807 | 6.90824867 |
| 7.50993550  | 10.28591704 | 7.18211774 |
| 1.39088233  | 5.91560169  | 6.75682788 |
| 6.34478798  | 5.90389862  | 6.77535305 |
| -0.00663655 | 0.88505262  | 6.63254397 |
| 5.69666907  | 3.29452370  | 6.73284727 |
| 0.68990619  | 12.41153572 | 4.90895922 |
| 5.01878840  | 0.90923560  | 6.69447608 |
| 0.73224062  | 3.29539195  | 6.64664750 |
| 3.24848325  | 11.76749552 | 5.18472689 |
| 5.70802051  | 7.29698297  | 4.69846477 |
| 1.40373765  | 9.91258088  | 4.85379777 |

|             |             |            |
|-------------|-------------|------------|
| 7.53684617  | 4.23550114  | 5.07121189 |
| 2.52970445  | 4.23492991  | 5.03461149 |
| 8.19035992  | 6.76868813  | 4.90344883 |
| 3.20809565  | 6.76524069  | 4.91499946 |
| 5.67579029  | 12.42688385 | 4.89575322 |
| 7.51629930  | 0.10709779  | 7.06750011 |
| 3.23812392  | 1.46594383  | 4.84630379 |
| 8.23394866  | 11.76327833 | 5.18027662 |
| 8.88237929  | 9.24495972  | 5.12089518 |
| 6.39256848  | 9.90022034  | 4.82747807 |
| 5.02440415  | 4.85400321  | 4.72866737 |
| 0.00993144  | 4.87913900  | 4.75384687 |
| 0.72571553  | 7.29961166  | 4.68700898 |
| 3.88558095  | 9.25518662  | 5.12155551 |
| 5.76253308  | 2.20286869  | 4.51536136 |
| 0.77512547  | 2.19016946  | 4.49791015 |
| 8.92724419  | 3.16928101  | 3.13275409 |
| 3.93734455  | 3.16928101  | 3.13275409 |
| 9.65447807  | 0.51179242  | 2.92767382 |
| 4.66457796  | 0.51179242  | 2.92767382 |
| 8.19081593  | 10.75315189 | 2.92137337 |
| 3.20091629  | 10.75315189 | 2.92137337 |
| 7.52427816  | 8.16568470  | 2.89047265 |
| 2.53437829  | 8.16568470  | 2.89047265 |
| 6.46140337  | 3.88992119  | 2.81003308 |
| 1.47150326  | 3.88992119  | 2.81003308 |
| 8.23615360  | 5.59719324  | 2.75910425 |
| 3.24625349  | 5.59719324  | 2.75910425 |
| 5.72548342  | 11.29866314 | 2.69921899 |
| 0.73558354  | 11.29866314 | 2.69921899 |
| 5.02271366  | 8.84247589  | 2.64073300 |
| 0.03281343  | 8.84247589  | 2.64073300 |
| 7.16234589  | 1.15467191  | 2.58495903 |
| 2.17244577  | 1.15467191  | 2.58495903 |
| 5.69094276  | 6.28061676  | 2.47308970 |
| 0.70104283  | 6.28061676  | 2.47308970 |
| 4.72644854  | 4.52631235  | 0.98044425 |
| -0.26345146 | 4.52631235  | 0.98044425 |
| 8.98416233  | 2.08401227  | 0.94984233 |
| 3.99426270  | 2.08401227  | 0.94984233 |
| 7.49692297  | 12.16127491 | 0.88189071 |
| 2.50702286  | 12.16127491 | 0.88189071 |
| 8.92881203  | 7.14167833  | 0.77916235 |
| 3.93891239  | 7.14167833  | 0.77916235 |

|            |             |            |
|------------|-------------|------------|
| 8.23179626 | 9.65808487  | 0.74752367 |
| 3.24189639 | 9.65808487  | 0.74752367 |
| 6.50168800 | 2.71004343  | 0.73384589 |
| 1.51178777 | 2.71004343  | 0.73384589 |
| 5.78449345 | 0.24636792  | 0.66762453 |
| 0.79459333 | 0.24636792  | 0.66762453 |
| 6.40908241 | 7.83185196  | 0.60482943 |
| 1.41918242 | 7.83185196  | 0.60482943 |
| 7.18588972 | 5.31081581  | 0.60368013 |
| 2.19598985 | 5.31081581  | 0.60368013 |
| 5.68450737 | 10.28863907 | 0.50651002 |
| 0.69460732 | 10.28863907 | 0.50651002 |

# COOH (state1)

1.000000000000

|             |             |             |    |
|-------------|-------------|-------------|----|
| 9.97980000  | 0.00000000  | 0.00000000  |    |
| -0.76395804 | 12.66177393 | 0.00000000  |    |
| 0.00000004  | 0.00000004  | 19.64040000 |    |
| H           | C           | O           | Fe |
| 2           | 41          | 6           | 80 |

Cart

|             |             |            |
|-------------|-------------|------------|
| 0.03164937  | 4.28188808  | 9.72804657 |
| 6.22812813  | 11.32928654 | 7.98286961 |
| 4.18379521  | 9.30962225  | 7.39309415 |
| 9.29962163  | 2.89917869  | 8.50411795 |
| 6.80531765  | 7.55501449  | 8.42432933 |
| 1.77434337  | 7.49407609  | 8.39390871 |
| 0.97457927  | 11.37826352 | 8.45550192 |
| 4.58748678  | 2.59440203  | 8.20682387 |
| 9.17377154  | 9.29517324  | 7.38301271 |
| 4.21221064  | 3.14073405  | 5.27620388 |
| 7.20107648  | 4.28226304  | 7.13647945 |
| -0.31639290 | 10.81052198 | 4.26802360 |
| 8.42193366  | 11.94556147 | 7.17261003 |
| -0.33909199 | 6.75476375  | 6.27646776 |
| 4.65351887  | 6.79150970  | 6.30452848 |
| 1.75300657  | 1.59498261  | 6.17707019 |
| 6.74056315  | 1.63152277  | 6.16287858 |
| 2.17136055  | 8.29807777  | 5.58810318 |
| 7.15951786  | 8.29655518  | 5.58532545 |
| 9.19581886  | 3.13728770  | 5.25949184 |
| 2.22362835  | 4.28561939  | 7.15641028 |
| 4.23863111  | 7.20096321  | 3.32812411 |

|             |             |            |
|-------------|-------------|------------|
| 7.18450449  | 12.34976093 | 3.64187641 |
| 6.72696391  | 5.70431548  | 4.01301934 |
| 1.73061055  | 5.70512604  | 4.01332591 |
| 3.46792276  | 11.96777659 | 7.16994953 |
| 2.19076329  | 12.34578184 | 3.64402908 |
| 9.22433162  | 7.20113045  | 3.32186320 |
| 4.67492685  | 10.80959146 | 4.26359089 |
| 5.47292232  | 2.23055553  | 2.34193015 |
| 0.48302215  | 2.23055553  | 2.34193015 |
| 6.73540354  | 9.72874641  | 2.00704742 |
| 1.74550355  | 9.72874641  | 2.00704742 |
| 7.98876715  | 3.77819967  | 1.47019899 |
| 2.99886727  | 3.77819967  | 1.47019899 |
| 9.21347809  | 11.29064846 | 1.28800344 |
| 4.22357798  | 11.29064846 | 1.28800344 |
| 5.52626467  | 6.13002825  | 0.45987183 |
| 0.53636485  | 6.13002825  | 0.45987183 |
| 7.45328903  | 1.12937152  | 0.40848067 |
| 2.46338916  | 1.12937152  | 0.40848067 |
| 4.75647831  | 8.73880577  | 0.18583304 |
| -0.23342146 | 8.73880577  | 0.18583304 |
| 9.24639356  | 4.19215862  | 9.10989308 |
| 4.75564114  | 2.43269893  | 9.37741264 |
| 0.06271443  | 2.05170386  | 9.02610561 |
| 6.58564656  | 7.33918538  | 9.57708407 |
| 1.57272654  | 7.21157097  | 9.53786843 |
| 1.16513805  | 11.47316415 | 9.62696173 |
| 2.53923493  | 10.29994861 | 7.20771784 |
| 0.70101821  | 8.30611751  | 6.94092797 |
| 3.17227175  | 7.79870688  | 7.13426128 |
| 8.16003392  | 7.79312902  | 7.12715474 |
| 2.54838281  | 0.09122291  | 7.09791675 |
| 8.22858821  | 1.47665394  | 4.84712569 |
| 3.89540738  | 5.17940440  | 6.98683454 |
| 8.88190144  | 5.22560272  | 7.14463775 |
| 3.20751743  | 2.72705253  | 6.89495856 |
| 8.21813472  | 2.74555675  | 6.91076458 |
| 0.00298095  | 10.92401455 | 6.97722167 |
| 5.69696598  | 8.33105725  | 6.94945671 |
| 5.00406356  | 10.92155383 | 6.90810241 |
| 7.50990246  | 10.28603318 | 7.18229200 |
| 1.39201426  | 5.91413600  | 6.76001105 |
| 6.36253973  | 5.91376408  | 6.79389477 |
| -0.00089790 | 0.90259939  | 6.71916745 |

|            |             |            |
|------------|-------------|------------|
| 5.68765541 | 3.29239931  | 6.72668419 |
| 0.68866452 | 12.42213106 | 4.91916600 |
| 5.01569107 | 0.90813228  | 6.68911408 |
| 0.72733897 | 3.30505017  | 6.62635919 |
| 3.25010302 | 11.76675147 | 5.18582797 |
| 5.71257314 | 7.30040629  | 4.70098606 |
| 1.40428636 | 9.91681798  | 4.85303297 |
| 7.52816829 | 4.25409229  | 5.05952509 |
| 2.53100920 | 4.24545283  | 5.03094135 |
| 8.19643222 | 6.77569820  | 4.90661649 |
| 3.21036151 | 6.77341198  | 4.91481652 |
| 5.67397496 | 12.43061895 | 4.89508588 |
| 7.51141556 | 0.10371449  | 7.07166239 |
| 3.23993952 | 1.46250911  | 4.83862942 |
| 8.23995570 | 11.77497676 | 5.18913328 |
| 8.88513231 | 9.25175029  | 5.12450085 |
| 6.39634174 | 9.90520824  | 4.82858029 |
| 5.02460584 | 4.86249335  | 4.73289560 |
| 0.01002180 | 4.88295810  | 4.73988425 |
| 0.72580242 | 7.30715785  | 4.69113316 |
| 3.89086294 | 9.25626956  | 5.12492151 |
| 5.75946072 | 2.20349867  | 4.50971943 |
| 0.76826921 | 2.18341880  | 4.50036375 |
| 8.92724419 | 3.16928101  | 3.13275409 |
| 3.93734455 | 3.16928101  | 3.13275409 |
| 9.65447807 | 0.51179242  | 2.92767382 |
| 4.66457796 | 0.51179242  | 2.92767382 |
| 8.19081593 | 10.75315189 | 2.92137337 |
| 3.20091629 | 10.75315189 | 2.92137337 |
| 7.52427816 | 8.16568470  | 2.89047265 |
| 2.53437829 | 8.16568470  | 2.89047265 |
| 6.46140337 | 3.88992119  | 2.81003308 |
| 1.47150326 | 3.88992119  | 2.81003308 |
| 8.23615360 | 5.59719324  | 2.75910425 |
| 3.24625349 | 5.59719324  | 2.75910425 |
| 5.72548342 | 11.29866314 | 2.69921899 |
| 0.73558354 | 11.29866314 | 2.69921899 |
| 5.02271366 | 8.84247589  | 2.64073300 |
| 0.03281343 | 8.84247589  | 2.64073300 |
| 7.16234589 | 1.15467191  | 2.58495903 |
| 2.17244577 | 1.15467191  | 2.58495903 |
| 5.69094276 | 6.28061676  | 2.47308970 |
| 0.70104283 | 6.28061676  | 2.47308970 |
| 4.72644854 | 4.52631235  | 0.98044425 |



|             |             |            |
|-------------|-------------|------------|
| -0.26345146 | 4.52631235  | 0.98044425 |
| 8.98416233  | 2.08401227  | 0.94984233 |
| 3.99426270  | 2.08401227  | 0.94984233 |
| 7.49692297  | 12.16127491 | 0.88189071 |
| 2.50702286  | 12.16127491 | 0.88189071 |
| 8.92881203  | 7.14167833  | 0.77916235 |
| 3.93891239  | 7.14167833  | 0.77916235 |
| 8.23179626  | 9.65808487  | 0.74752367 |
| 3.24189639  | 9.65808487  | 0.74752367 |
| 6.50168800  | 2.71004343  | 0.73384589 |
| 1.51178777  | 2.71004343  | 0.73384589 |
| 5.78449345  | 0.24636792  | 0.66762453 |
| 0.79459333  | 0.24636792  | 0.66762453 |
| 6.40908241  | 7.83185196  | 0.60482943 |
| 1.41918242  | 7.83185196  | 0.60482943 |
| 7.18588972  | 5.31081581  | 0.60368013 |
| 2.19598985  | 5.31081581  | 0.60368013 |
| 5.68450737  | 10.28863907 | 0.50651002 |
| 0.69460732  | 10.28863907 | 0.50651002 |

# COOH (state2)

1.000000000000

|             |             |             |    |
|-------------|-------------|-------------|----|
| 9.97980022  | 0.00000000  | 0.00000000  |    |
| -0.76395801 | 12.66177369 | 0.00000000  |    |
| 0.00000004  | 0.00000004  | 19.64039993 |    |
| H           | C           | O           | Fe |
| 2           | 41          | 6           | 80 |

Cart

|             |             |             |
|-------------|-------------|-------------|
| 5.38342663  | 11.35914282 | 10.76637434 |
| 1.22123881  | 11.35135590 | 7.97233576  |
| 4.20459131  | 9.32691293  | 7.40844379  |
| 5.53567763  | 11.51789412 | 8.88066098  |
| 1.78307931  | 7.67653853  | 8.44106124  |
| 6.76260199  | 7.69196010  | 8.44636596  |
| 4.62863442  | 2.62605353  | 8.21551666  |
| 9.58326589  | 2.58171284  | 8.21626906  |
| 9.18392068  | 9.30678885  | 7.37891399  |
| 2.19286863  | 4.27733642  | 7.20782367  |
| 7.18449682  | 4.26608192  | 7.20593680  |
| 2.20023439  | 12.34730666 | 3.64211695  |
| 8.42054084  | 11.94195183 | 7.13954559  |
| -0.32791892 | 6.78054023  | 6.31252129  |
| 4.65608493  | 6.79407065  | 6.31080064  |

|             |             |            |
|-------------|-------------|------------|
| 1.74440210  | 1.63737341  | 6.17879520 |
| 4.20915085  | 3.14307205  | 5.29247042 |
| 2.17922583  | 8.29562184  | 5.59229306 |
| 7.16200802  | 8.29819226  | 5.60015419 |
| 6.73707623  | 1.61501982  | 6.15660722 |
| 9.19533363  | 3.14436986  | 5.29678506 |
| 4.67503650  | 10.81033266 | 4.25722499 |
| -0.31142187 | 10.81731462 | 4.26560138 |
| 6.72244142  | 5.70410124  | 4.01253548 |
| 1.73568853  | 5.70364104  | 4.01141935 |
| 7.17383405  | 12.35110731 | 3.64573728 |
| 3.43756780  | 11.98004329 | 7.20743814 |
| 9.22919206  | 7.20389565  | 3.34005639 |
| 4.23955900  | 7.20106606  | 3.33355117 |
| 5.47292232  | 2.23055553  | 2.34193015 |
| 0.48302215  | 2.23055553  | 2.34193015 |
| 6.73540354  | 9.72874641  | 2.00704742 |
| 1.74550355  | 9.72874641  | 2.00704742 |
| 7.98876715  | 3.77819967  | 1.47019899 |
| 2.99886727  | 3.77819967  | 1.47019899 |
| 9.21347809  | 11.29064846 | 1.28800344 |
| 4.22357798  | 11.29064846 | 1.28800344 |
| 5.52626467  | 6.13002825  | 0.45987183 |
| 0.53636485  | 6.13002825  | 0.45987183 |
| 7.45328903  | 1.12937152  | 0.40848067 |
| 2.46338916  | 1.12937152  | 0.40848067 |
| 4.75647831  | 8.73880577  | 0.18583304 |
| -0.23342146 | 8.73880577  | 0.18583304 |
| 5.06622227  | 10.88533873 | 9.96121208 |
| 9.73995122  | 2.39470894  | 9.38567980 |
| 6.24801641  | 12.55492984 | 9.05964484 |
| 1.62309266  | 7.48393884  | 9.60594931 |
| 6.62732573  | 7.52981408  | 9.61824428 |
| 4.74495425  | 2.43525212  | 9.38845760 |
| 2.51640675  | 10.29852292 | 7.20126329 |
| 0.00558955  | 10.92451062 | 6.88861750 |
| 3.17972789  | 7.82001050  | 7.13843176 |
| 8.16900189  | 7.80037237  | 7.13493167 |
| 5.75021311  | 2.18694041  | 4.50771436 |
| 7.52273774  | 0.12784385  | 7.13687519 |
| 3.86410598  | 5.18989497  | 6.98992774 |
| 8.84855657  | 5.18344741  | 6.98934379 |
| 3.21060935  | 2.74458778  | 6.91799033 |
| 8.20359259  | 2.73915130  | 6.90941109 |

|            |             |            |
|------------|-------------|------------|
| 0.71330453 | 8.33615546  | 6.94285499 |
| 5.69879931 | 8.33085836  | 6.94673763 |
| 4.99577389 | 10.97070637 | 7.11772830 |
| 7.52631100 | 10.25669089 | 7.06042287 |
| 1.38644313 | 5.91648942  | 6.79469199 |
| 6.36479925 | 5.90409084  | 6.78945009 |
| 0.70107895 | 3.28471219  | 6.73963484 |
| 5.68675408 | 3.28973854  | 6.72782758 |
| 0.69697185 | 12.42335908 | 4.89287785 |
| 4.98267108 | 0.92150164  | 6.65784118 |
| 3.25673177 | 11.75679740 | 5.20910841 |
| 8.24557174 | 11.78550449 | 5.17115300 |
| 8.89152185 | 9.22513996  | 5.06024005 |
| 3.90305277 | 9.25844906  | 5.12914644 |
| 7.50333833 | 4.23743691  | 5.03537384 |
| 2.51589485 | 4.23925922  | 5.03898933 |
| 8.19611564 | 6.76133500  | 4.92093710 |
| 3.21156431 | 6.77061705  | 4.91912028 |
| 5.69107275 | 12.39837257 | 4.94335510 |
| 3.23239812 | 1.47309575  | 4.84624689 |
| 0.76002195 | 2.19305126  | 4.51613863 |
| 0.01497620 | 0.89400399  | 6.68397248 |
| 1.40689740 | 9.89689803  | 4.82455934 |
| 6.39216407 | 9.90291645  | 4.82853664 |
| 5.01216550 | 4.86083059  | 4.73118282 |
| 0.02622546 | 4.86007057  | 4.73826587 |
| 0.72793021 | 7.29492454  | 4.70400677 |
| 5.71677634 | 7.29714834  | 4.70333361 |
| 8.21960639 | 1.47488083  | 4.84146909 |
| 2.51649714 | 0.09827927  | 7.06572168 |
| 8.92724419 | 3.16928101  | 3.13275409 |
| 3.93734455 | 3.16928101  | 3.13275409 |
| 9.65447807 | 0.51179242  | 2.92767382 |
| 4.66457796 | 0.51179242  | 2.92767382 |
| 8.19081593 | 10.75315189 | 2.92137337 |
| 3.20091629 | 10.75315189 | 2.92137337 |
| 7.52427816 | 8.16568470  | 2.89047265 |
| 2.53437829 | 8.16568470  | 2.89047265 |
| 6.46140337 | 3.88992119  | 2.81003308 |
| 1.47150326 | 3.88992119  | 2.81003308 |
| 8.23615360 | 5.59719324  | 2.75910425 |
| 3.24625349 | 5.59719324  | 2.75910425 |
| 5.72548342 | 11.29866314 | 2.69921899 |
| 0.73558354 | 11.29866314 | 2.69921899 |

|             |             |            |
|-------------|-------------|------------|
| 5.02271366  | 8.84247589  | 2.64073300 |
| 0.03281343  | 8.84247589  | 2.64073300 |
| 7.16234589  | 1.15467191  | 2.58495903 |
| 2.17244577  | 1.15467191  | 2.58495903 |
| 5.69094276  | 6.28061676  | 2.47308970 |
| 0.70104283  | 6.28061676  | 2.47308970 |
| 4.72644854  | 4.52631235  | 0.98044425 |
| -0.26345146 | 4.52631235  | 0.98044425 |
| 8.98416233  | 2.08401227  | 0.94984233 |
| 3.99426270  | 2.08401227  | 0.94984233 |
| 7.49692297  | 12.16127491 | 0.88189071 |
| 2.50702286  | 12.16127491 | 0.88189071 |
| 8.92881203  | 7.14167833  | 0.77916235 |
| 3.93891239  | 7.14167833  | 0.77916235 |
| 8.23179626  | 9.65808487  | 0.74752367 |
| 3.24189639  | 9.65808487  | 0.74752367 |
| 6.50168800  | 2.71004343  | 0.73384589 |
| 1.51178777  | 2.71004343  | 0.73384589 |
| 5.78449345  | 0.24636792  | 0.66762453 |
| 0.79459333  | 0.24636792  | 0.66762453 |
| 6.40908241  | 7.83185196  | 0.60482943 |
| 1.41918242  | 7.83185196  | 0.60482943 |
| 7.18588972  | 5.31081581  | 0.60368013 |
| 2.19598985  | 5.31081581  | 0.60368013 |
| 5.68450737  | 10.28863907 | 0.50651002 |
| 0.69460732  | 10.28863907 | 0.50651002 |

# TS for COOH+C<sub>Cv</sub>->CO<sub>2</sub>+CH<sub>Cv</sub>

1.000000000000

|             |             |             |    |
|-------------|-------------|-------------|----|
| 9.97980000  | 0.00000000  | 0.00000000  |    |
| -0.76395804 | 12.66177393 | 0.00000000  |    |
| 0.00000004  | 0.00000004  | 19.64040000 |    |
| H           | C           | O           | Fe |
| 2           | 41          | 6           | 80 |

Cart

|            |             |            |
|------------|-------------|------------|
| 4.43344423 | 9.73153197  | 8.93232744 |
| 1.25895986 | 11.31710919 | 7.95190700 |
| 4.20257204 | 9.31011953  | 7.73078348 |
| 5.49827132 | 11.39184779 | 8.83124216 |
| 1.69909035 | 7.67022765  | 8.43535574 |
| 6.82953685 | 7.61832858  | 8.44988626 |
| 4.63396854 | 2.66254540  | 8.22238225 |
| 9.58193716 | 2.56134181  | 8.21537030 |
| 9.19105311 | 9.30877472  | 7.37612582 |

|             |             |            |
|-------------|-------------|------------|
| 2.20017604  | 4.27820002  | 7.20231391 |
| 7.18924738  | 4.27007841  | 7.19893927 |
| 2.19152344  | 12.35072487 | 3.63582297 |
| 8.40819986  | 11.94606957 | 7.14264039 |
| -0.32794801 | 6.78453487  | 6.30132068 |
| 4.64874168  | 6.82487332  | 6.33756285 |
| 1.74339463  | 1.62775439  | 6.18427127 |
| 4.21172159  | 3.14361777  | 5.29372957 |
| 2.18247452  | 8.33089539  | 5.62944092 |
| 7.15863571  | 8.30434068  | 5.61582763 |
| 6.74219583  | 1.60287661  | 6.15518597 |
| 9.19923183  | 3.15190052  | 5.29905171 |
| 4.68753332  | 10.83319237 | 4.28519572 |
| -0.31908544 | 10.82220044 | 4.26955512 |
| 6.72276487  | 5.70948248  | 4.01615621 |
| 1.73851982  | 5.71168093  | 4.01477516 |
| 7.18100217  | 12.35191657 | 3.63597218 |
| 3.46202236  | 11.95551465 | 7.13666869 |
| 9.23025843  | 7.20256532  | 3.34060984 |
| 4.24028294  | 7.20558755  | 3.35348731 |
| 5.47292232  | 2.23055553  | 2.34193015 |
| 0.48302215  | 2.23055553  | 2.34193015 |
| 6.73540354  | 9.72874641  | 2.00704742 |
| 1.74550355  | 9.72874641  | 2.00704742 |
| 7.98876715  | 3.77819967  | 1.47019899 |
| 2.99886727  | 3.77819967  | 1.47019899 |
| 9.21347809  | 11.29064846 | 1.28800344 |
| 4.22357798  | 11.29064846 | 1.28800344 |
| 5.52626467  | 6.13002825  | 0.45987183 |
| 0.53636485  | 6.13002825  | 0.45987183 |
| 7.45328903  | 1.12937152  | 0.40848067 |
| 2.46338916  | 1.12937152  | 0.40848067 |
| 4.75647831  | 8.73880577  | 0.18583304 |
| -0.23342146 | 8.73880577  | 0.18583304 |
| 4.99981902  | 10.66058246 | 9.73899444 |
| 9.74723372  | 2.37547999  | 9.38246543 |
| 6.18716318  | 12.44838696 | 9.03691749 |
| 1.66080053  | 7.45204449  | 9.60551582 |
| 6.61146091  | 7.41819722  | 9.60202845 |
| 4.73874624  | 2.49693829  | 9.39844211 |
| 2.54917880  | 10.27818884 | 7.14276452 |
| 0.00196369  | 10.93482142 | 6.89092731 |
| 3.19995598  | 7.85879091  | 7.16371062 |
| 8.17191248  | 7.79533083  | 7.13568291 |

|            |             |            |
|------------|-------------|------------|
| 5.75372330 | 2.19884741  | 4.50507570 |
| 7.49571621 | 0.11077747  | 7.17162173 |
| 3.87875931 | 5.18566383  | 6.97788941 |
| 8.85592769 | 5.18186339  | 6.98185522 |
| 3.21274033 | 2.74375222  | 6.91706127 |
| 8.20246057 | 2.73537290  | 6.91121741 |
| 0.71928761 | 8.33224075  | 6.95216040 |
| 5.68022717 | 8.36267441  | 6.98073878 |
| 5.03264154 | 10.94754906 | 6.92283401 |
| 7.52583285 | 10.25195597 | 7.08193575 |
| 1.38199121 | 5.90891025  | 6.79137541 |
| 6.36376502 | 5.90852236  | 6.79161278 |
| 0.70308348 | 3.28426931  | 6.74014213 |
| 5.68933152 | 3.29335812  | 6.72623860 |
| 0.68436208 | 12.43190241 | 4.89066065 |
| 4.98104911 | 0.92215659  | 6.64324643 |
| 3.24977984 | 11.76909916 | 5.17141864 |
| 8.23059909 | 11.77908249 | 5.17715435 |
| 8.89154343 | 9.22893672  | 5.07431182 |
| 3.88040707 | 9.22733223  | 5.02387583 |
| 7.50539905 | 4.24178675  | 5.03607823 |
| 2.51922946 | 4.24191423  | 5.03952138 |
| 8.19402648 | 6.76749507  | 4.92053869 |
| 3.20044004 | 6.77281684  | 4.94472839 |
| 5.69574870 | 12.43534984 | 4.91258199 |
| 3.22693151 | 1.48235615  | 4.84289673 |
| 0.76307309 | 2.19896085  | 4.51811146 |
| 0.01428439 | 0.89158048  | 6.69313664 |
| 1.40314186 | 9.90180595  | 4.79784714 |
| 6.39265696 | 9.89591152  | 4.81151420 |
| 5.01301158 | 4.86096402  | 4.72191908 |
| 0.02867740 | 4.86499201  | 4.73389486 |
| 0.73034596 | 7.30933428  | 4.70231285 |
| 5.70832155 | 7.29882849  | 4.72252471 |
| 8.23140834 | 1.47984142  | 4.84343759 |
| 2.53057327 | 0.08200067  | 7.05180513 |
| 8.92724419 | 3.16928101  | 3.13275409 |
| 3.93734455 | 3.16928101  | 3.13275409 |
| 9.65447807 | 0.51179242  | 2.92767382 |
| 4.66457796 | 0.51179242  | 2.92767382 |
| 8.19081593 | 10.75315189 | 2.92137337 |
| 3.20091629 | 10.75315189 | 2.92137337 |
| 7.52427816 | 8.16568470  | 2.89047265 |
| 2.53437829 | 8.16568470  | 2.89047265 |

|             |             |            |
|-------------|-------------|------------|
| 6.46140337  | 3.88992119  | 2.81003308 |
| 1.47150326  | 3.88992119  | 2.81003308 |
| 8.23615360  | 5.59719324  | 2.75910425 |
| 3.24625349  | 5.59719324  | 2.75910425 |
| 5.72548342  | 11.29866314 | 2.69921899 |
| 0.73558354  | 11.29866314 | 2.69921899 |
| 5.02271366  | 8.84247589  | 2.64073300 |
| 0.03281343  | 8.84247589  | 2.64073300 |
| 7.16234589  | 1.15467191  | 2.58495903 |
| 2.17244577  | 1.15467191  | 2.58495903 |
| 5.69094276  | 6.28061676  | 2.47308970 |
| 0.70104283  | 6.28061676  | 2.47308970 |
| 4.72644854  | 4.52631235  | 0.98044425 |
| -0.26345146 | 4.52631235  | 0.98044425 |
| 8.98416233  | 2.08401227  | 0.94984233 |
| 3.99426270  | 2.08401227  | 0.94984233 |
| 7.49692297  | 12.16127491 | 0.88189071 |
| 2.50702286  | 12.16127491 | 0.88189071 |
| 8.92881203  | 7.14167833  | 0.77916235 |
| 3.93891239  | 7.14167833  | 0.77916235 |
| 8.23179626  | 9.65808487  | 0.74752367 |
| 3.24189639  | 9.65808487  | 0.74752367 |
| 6.50168800  | 2.71004343  | 0.73384589 |
| 1.51178777  | 2.71004343  | 0.73384589 |
| 5.78449345  | 0.24636792  | 0.66762453 |
| 0.79459333  | 0.24636792  | 0.66762453 |
| 6.40908241  | 7.83185196  | 0.60482943 |
| 1.41918242  | 7.83185196  | 0.60482943 |
| 7.18588972  | 5.31081581  | 0.60368013 |
| 2.19598985  | 5.31081581  | 0.60368013 |
| 5.68450737  | 10.28863907 | 0.50651002 |
| 0.69460732  | 10.28863907 | 0.50651002 |

# CO<sub>2</sub>+CH<sub>Cv</sub>

1.000000000000

|             |             |             |    |
|-------------|-------------|-------------|----|
| 9.97980000  | 0.00000000  | 0.00000000  |    |
| -0.76395804 | 12.66177393 | 0.00000000  |    |
| 0.00000004  | 0.00000004  | 19.64040000 |    |
| H           | C           | O           | Fe |
| 2           | 41          | 6           | 80 |

Cart

|            |             |            |
|------------|-------------|------------|
| 4.18715622 | 9.34713978  | 9.09705605 |
| 1.26961172 | 11.28820701 | 7.91935646 |

|             |             |             |
|-------------|-------------|-------------|
| 4.20606355  | 9.23568690  | 7.99803973  |
| 5.44148155  | 11.56848796 | 9.08151341  |
| 1.84816453  | 7.59541305  | 8.44810347  |
| 6.72731911  | 7.76901035  | 8.48167737  |
| 4.63845585  | 2.61086334  | 8.21416250  |
| 9.57236782  | 2.57331017  | 8.21558535  |
| 9.19175696  | 9.29581640  | 7.37645014  |
| 2.20263995  | 4.27064001  | 7.19567027  |
| 7.18154423  | 4.25595758  | 7.19916622  |
| 2.20341085  | 12.34673625 | 3.64807325  |
| 8.41242243  | 11.92132695 | 7.13709214  |
| -0.32046737 | 6.77382490  | 6.33272911  |
| 4.65355730  | 6.82657515  | 6.31838643  |
| 1.74868554  | 1.61282559  | 6.19101139  |
| 4.21254966  | 3.13824463  | 5.28948291  |
| 2.20108784  | 8.33546372  | 5.64788372  |
| 7.15541366  | 8.29305110  | 5.62496524  |
| 6.74329759  | 1.58466124  | 6.15435210  |
| 9.19753365  | 3.13974780  | 5.29457192  |
| 4.68778059  | 10.80773925 | 4.26220641  |
| -0.31371738 | 10.80897992 | 4.26826591  |
| 6.72476884  | 5.70476563  | 4.01695328  |
| 1.73600401  | 5.70698966  | 4.01490977  |
| 7.17713353  | 12.34814220 | 3.64532375  |
| 3.46570460  | 11.90684058 | 7.17972049  |
| 9.23364131  | 7.20283230  | 3.35655073  |
| 4.24319900  | 7.21008013  | 3.35475508  |
| 5.47292232  | 2.23055553  | 2.34193015  |
| 0.48302215  | 2.23055553  | 2.34193015  |
| 6.73540354  | 9.72874641  | 2.00704742  |
| 1.74550355  | 9.72874641  | 2.00704742  |
| 7.98876715  | 3.77819967  | 1.47019899  |
| 2.99886727  | 3.77819967  | 1.47019899  |
| 9.21347809  | 11.29064846 | 1.28800344  |
| 4.22357798  | 11.29064846 | 1.28800344  |
| 5.52626467  | 6.13002825  | 0.45987183  |
| 0.53636485  | 6.13002825  | 0.45987183  |
| 7.45328903  | 1.12937152  | 0.40848067  |
| 2.46338916  | 1.12937152  | 0.40848067  |
| 4.75647831  | 8.73880577  | 0.18583304  |
| -0.23342146 | 8.73880577  | 0.18583304  |
| 4.97446273  | 11.03328002 | 10.06330014 |
| 9.73603348  | 2.40312963  | 9.38384486  |
| 6.15939310  | 12.63939054 | 8.97922889  |



|            |             |            |
|------------|-------------|------------|
| 1.64046784 | 7.39224303  | 9.60269934 |
| 6.67540307 | 7.57406040  | 9.65383273 |
| 4.72414597 | 2.41839775  | 9.38689026 |
| 2.57484728 | 10.21691704 | 7.15751003 |
| 0.00611153 | 10.90839554 | 6.87901372 |
| 3.21600342 | 7.82603099  | 7.15316000 |
| 8.16299657 | 7.79478114  | 7.14874625 |
| 5.75307350 | 2.18097260  | 4.50811736 |
| 7.50689496 | 0.08758422  | 7.16380926 |
| 3.88340286 | 5.18465536  | 6.98256349 |
| 8.84924003 | 5.17278006  | 6.98862180 |
| 3.21494690 | 2.73267790  | 6.91375300 |
| 8.20214534 | 2.72621882  | 6.90443074 |
| 0.72887654 | 8.32107164  | 6.96153872 |
| 5.66508223 | 8.37178496  | 6.99465967 |
| 5.01540254 | 10.86164583 | 7.10773481 |
| 7.51822010 | 10.23597962 | 7.09228560 |
| 1.39941386 | 5.91643224  | 6.80472184 |
| 6.36096570 | 5.89789544  | 6.78448456 |
| 0.70652763 | 3.27328466  | 6.73709840 |
| 5.68790738 | 3.26669619  | 6.72503378 |
| 0.69450783 | 12.42006321 | 4.89232412 |
| 4.99268603 | 0.87629494  | 6.67011599 |
| 3.26116989 | 11.72493087 | 5.19948538 |
| 8.24160434 | 11.76699825 | 5.17250490 |
| 8.89053078 | 9.21547608  | 5.06791635 |
| 3.88679382 | 9.20166412  | 4.99405471 |
| 7.50495665 | 4.23513954  | 5.03700159 |
| 2.51779283 | 4.23540595  | 5.04152032 |
| 8.19644772 | 6.76003649  | 4.93366272 |
| 3.20228144 | 6.75744330  | 4.92946525 |
| 5.69031525 | 12.39544512 | 4.94066052 |
| 3.23896424 | 1.46131734  | 4.85023677 |
| 0.76620566 | 2.18936293  | 4.51878237 |
| 0.01868092 | 0.87439498  | 6.69002543 |
| 1.40474854 | 9.88286833  | 4.78268102 |
| 6.38974086 | 9.88836265  | 4.82709166 |
| 5.01540754 | 4.85568347  | 4.72589407 |
| 0.02995881 | 4.86102812  | 4.74277425 |
| 0.73391501 | 7.30751471  | 4.71473074 |
| 5.71682896 | 7.29454929  | 4.72321730 |
| 8.22777251 | 1.46007982  | 4.84529265 |
| 2.54501465 | 0.05833612  | 7.04594007 |
| 8.92724419 | 3.16928101  | 3.13275409 |

|             |             |            |
|-------------|-------------|------------|
| 3.93734455  | 3.16928101  | 3.13275409 |
| 9.65447807  | 0.51179242  | 2.92767382 |
| 4.66457796  | 0.51179242  | 2.92767382 |
| 8.19081593  | 10.75315189 | 2.92137337 |
| 3.20091629  | 10.75315189 | 2.92137337 |
| 7.52427816  | 8.16568470  | 2.89047265 |
| 2.53437829  | 8.16568470  | 2.89047265 |
| 6.46140337  | 3.88992119  | 2.81003308 |
| 1.47150326  | 3.88992119  | 2.81003308 |
| 8.23615360  | 5.59719324  | 2.75910425 |
| 3.24625349  | 5.59719324  | 2.75910425 |
| 5.72548342  | 11.29866314 | 2.69921899 |
| 0.73558354  | 11.29866314 | 2.69921899 |
| 5.02271366  | 8.84247589  | 2.64073300 |
| 0.03281343  | 8.84247589  | 2.64073300 |
| 7.16234589  | 1.15467191  | 2.58495903 |
| 2.17244577  | 1.15467191  | 2.58495903 |
| 5.69094276  | 6.28061676  | 2.47308970 |
| 0.70104283  | 6.28061676  | 2.47308970 |
| 4.72644854  | 4.52631235  | 0.98044425 |
| -0.26345146 | 4.52631235  | 0.98044425 |
| 8.98416233  | 2.08401227  | 0.94984233 |
| 3.99426270  | 2.08401227  | 0.94984233 |
| 7.49692297  | 12.16127491 | 0.88189071 |
| 2.50702286  | 12.16127491 | 0.88189071 |
| 8.92881203  | 7.14167833  | 0.77916235 |
| 3.93891239  | 7.14167833  | 0.77916235 |
| 8.23179626  | 9.65808487  | 0.74752367 |
| 3.24189639  | 9.65808487  | 0.74752367 |
| 6.50168800  | 2.71004343  | 0.73384589 |
| 1.51178777  | 2.71004343  | 0.73384589 |
| 5.78449345  | 0.24636792  | 0.66762453 |
| 0.79459333  | 0.24636792  | 0.66762453 |
| 6.40908241  | 7.83185196  | 0.60482943 |
| 1.41918242  | 7.83185196  | 0.60482943 |
| 7.18588972  | 5.31081581  | 0.60368013 |
| 2.19598985  | 5.31081581  | 0.60368013 |
| 5.68450737  | 10.28863907 | 0.50651002 |
| 0.69460732  | 10.28863907 | 0.50651002 |

# COOH (state3)

1.000000000000

9.97980000

0.00000000

0.00000000

|             |             |             |    |
|-------------|-------------|-------------|----|
| -0.76395804 | 12.66177393 | 0.00000000  |    |
| 0.00000004  | 0.00000004  | 19.64040000 |    |
| H           | C           | O           | Fe |
| 2           | 41          | 6           | 80 |

Cart

|             |             |             |
|-------------|-------------|-------------|
| 9.66699867  | 2.49752041  | 10.23942988 |
| 1.22884604  | 11.30068476 | 7.98578563  |
| 4.17511132  | 9.27854628  | 7.37947720  |
| -0.07589258 | 3.28451499  | 8.51398194  |
| 1.79655845  | 7.53772025  | 8.42455317  |
| 6.79921467  | 7.47833274  | 8.41730062  |
| 4.58278852  | 2.57949209  | 8.22441545  |
| 5.98540487  | 11.34007432 | 8.43080480  |
| 9.16837021  | 9.26881689  | 7.39107294  |
| 2.19652826  | 4.25697285  | 7.15686702  |
| 7.19168919  | 4.26141158  | 7.13701929  |
| 2.19644173  | 12.34480142 | 3.63459561  |
| 8.44919719  | 11.93628669 | 7.15773430  |
| -0.35590244 | 6.70317372  | 6.28455058  |
| 4.64911577  | 6.75352456  | 6.29707032  |
| 1.72918042  | 1.61662898  | 6.18636435  |
| 4.20307855  | 3.12819050  | 5.29955560  |
| 2.16454465  | 8.26594627  | 5.58712421  |
| 7.15720430  | 8.27570011  | 5.59220127  |
| 6.70448183  | 1.58436614  | 6.16838390  |
| 9.21272488  | 3.10326388  | 5.28066390  |
| 4.67001124  | 10.78621735 | 4.26335566  |
| -0.31703973 | 10.77682446 | 4.25665755  |
| 6.72703726  | 5.68030984  | 4.01688356  |
| 1.72192032  | 5.67363680  | 4.01577595  |
| 7.18198657  | 12.33896292 | 3.63742716  |
| 3.42789232  | 11.93040773 | 7.17613431  |
| 9.22121546  | 7.20022542  | 3.33061217  |
| 4.23651955  | 7.20022000  | 3.33190863  |
| 5.47292232  | 2.23055553  | 2.34193015  |
| 0.48302215  | 2.23055553  | 2.34193015  |
| 6.73540354  | 9.72874641  | 2.00704742  |
| 1.74550355  | 9.72874641  | 2.00704742  |
| 7.98876715  | 3.77819967  | 1.47019899  |
| 2.99886727  | 3.77819967  | 1.47019899  |
| 9.21347809  | 11.29064846 | 1.28800344  |
| 4.22357798  | 11.29064846 | 1.28800344  |
| 5.52626467  | 6.13002825  | 0.45987183  |
| 0.53636485  | 6.13002825  | 0.45987183  |

|             |             |            |
|-------------|-------------|------------|
| 7.45328903  | 1.12937152  | 0.40848067 |
| 2.46338916  | 1.12937152  | 0.40848067 |
| 4.75647831  | 8.73880577  | 0.18583304 |
| -0.23342146 | 8.73880577  | 0.18583304 |
| 0.03419304  | 2.22899144  | 9.35664438 |
| 6.18916651  | 11.42338977 | 9.60262295 |
| 9.46587901  | 4.38063254  | 9.00101595 |
| 1.60878633  | 7.31127360  | 9.58071344 |
| 6.58420073  | 7.27316632  | 9.57235169 |
| 4.71843834  | 2.40955189  | 9.40056938 |
| 2.51125527  | 10.26411529 | 7.19107406 |
| 0.00870472  | 10.88622438 | 6.90697925 |
| 3.16691816  | 7.77267391  | 7.12988172 |
| 8.15944102  | 7.76082702  | 7.12978279 |
| 5.75108558  | 2.18699522  | 4.51358045 |
| 7.53073381  | 0.07015974  | 7.06760951 |
| 3.86402073  | 5.16076095  | 7.00671136 |
| 8.87275535  | 5.19876385  | 7.22134599 |
| 3.20170764  | 2.70604416  | 6.91628020 |
| 8.18427930  | 2.67355092  | 6.89503107 |
| 0.69699384  | 8.28969009  | 6.94789440 |
| 5.68930802  | 8.29193379  | 6.95125238 |
| 4.98723410  | 10.90278712 | 6.96582040 |
| 7.52856927  | 10.26588201 | 7.19344727 |
| 1.39251110  | 5.90500874  | 6.76594095 |
| 6.34516150  | 5.88752431  | 6.81525965 |
| 0.68105124  | 3.27625892  | 6.73081825 |
| 5.68185859  | 3.25886624  | 6.73806513 |
| 0.68450641  | 12.39736648 | 4.88639481 |
| 4.97716622  | 0.87954201  | 6.69135233 |
| 3.23962531  | 11.74693582 | 5.18545870 |
| 8.23269452  | 11.73649842 | 5.17313500 |
| 8.87527351  | 9.22701752  | 5.12302591 |
| 3.89102193  | 9.22527709  | 5.11996686 |
| 7.52724373  | 4.22667210  | 5.08530162 |
| 2.50893683  | 4.20954525  | 5.04248254 |
| 8.18742448  | 6.75335210  | 4.90927978 |
| 3.20376558  | 6.74390364  | 4.91323246 |
| 5.66870793  | 12.40467133 | 4.90866625 |
| 3.22721370  | 1.46041515  | 4.84218047 |
| 0.77212169  | 2.18311572  | 4.50369314 |
| 0.00315339  | 0.85859350  | 6.61044670 |
| 1.40346447  | 9.87844362  | 4.83610287 |
| 6.38826199  | 9.88933575  | 4.84442064 |

|             |             |            |
|-------------|-------------|------------|
| 5.02556891  | 4.84419671  | 4.75026553 |
| 0.01134072  | 4.85795646  | 4.79107418 |
| 0.71734611  | 7.27970753  | 4.69816030 |
| 5.71006301  | 7.28344926  | 4.70075046 |
| 8.22117032  | 1.45066578  | 4.83814894 |
| 2.50690301  | 0.06535402  | 7.05625192 |
| 8.92724419  | 3.16928101  | 3.13275409 |
| 3.93734455  | 3.16928101  | 3.13275409 |
| 9.65447807  | 0.51179242  | 2.92767382 |
| 4.66457796  | 0.51179242  | 2.92767382 |
| 8.19081593  | 10.75315189 | 2.92137337 |
| 3.20091629  | 10.75315189 | 2.92137337 |
| 7.52427816  | 8.16568470  | 2.89047265 |
| 2.53437829  | 8.16568470  | 2.89047265 |
| 6.46140337  | 3.88992119  | 2.81003308 |
| 1.47150326  | 3.88992119  | 2.81003308 |
| 8.23615360  | 5.59719324  | 2.75910425 |
| 3.24625349  | 5.59719324  | 2.75910425 |
| 5.72548342  | 11.29866314 | 2.69921899 |
| 0.73558354  | 11.29866314 | 2.69921899 |
| 5.02271366  | 8.84247589  | 2.64073300 |
| 0.03281343  | 8.84247589  | 2.64073300 |
| 7.16234589  | 1.15467191  | 2.58495903 |
| 2.17244577  | 1.15467191  | 2.58495903 |
| 5.69094276  | 6.28061676  | 2.47308970 |
| 0.70104283  | 6.28061676  | 2.47308970 |
| 4.72644854  | 4.52631235  | 0.98044425 |
| -0.26345146 | 4.52631235  | 0.98044425 |
| 8.98416233  | 2.08401227  | 0.94984233 |
| 3.99426270  | 2.08401227  | 0.94984233 |
| 7.49692297  | 12.16127491 | 0.88189071 |
| 2.50702286  | 12.16127491 | 0.88189071 |
| 8.92881203  | 7.14167833  | 0.77916235 |
| 3.93891239  | 7.14167833  | 0.77916235 |
| 8.23179626  | 9.65808487  | 0.74752367 |
| 3.24189639  | 9.65808487  | 0.74752367 |
| 6.50168800  | 2.71004343  | 0.73384589 |
| 1.51178777  | 2.71004343  | 0.73384589 |
| 5.78449345  | 0.24636792  | 0.66762453 |
| 0.79459333  | 0.24636792  | 0.66762453 |
| 6.40908241  | 7.83185196  | 0.60482943 |
| 1.41918242  | 7.83185196  | 0.60482943 |
| 7.18588972  | 5.31081581  | 0.60368013 |
| 2.19598985  | 5.31081581  | 0.60368013 |

|            |             |            |
|------------|-------------|------------|
| 5.68450737 | 10.28863907 | 0.50651002 |
| 0.69460732 | 10.28863907 | 0.50651002 |

# TS for COOH->CO<sub>2</sub>+H

1.000000000000

|             |             |             |    |
|-------------|-------------|-------------|----|
| 9.97980000  | 0.00000000  | 0.00000000  |    |
| -0.76395804 | 12.66177393 | 0.00000000  |    |
| 0.00000004  | 0.00000004  | 19.64040000 |    |
| H           | C           | O           | Fe |
| 2           | 41          | 6           | 80 |

Cart

|             |             |            |
|-------------|-------------|------------|
| 8.88765844  | 1.40234346  | 8.05905881 |
| 1.23211253  | 11.31666517 | 7.97254853 |
| 4.18085684  | 9.30414785  | 7.36526530 |
| 9.69938442  | 3.36002647  | 8.46207644 |
| 1.79065940  | 7.58447928  | 8.42584290 |
| 6.79607692  | 7.49938344  | 8.40938255 |
| 4.61133088  | 2.61794775  | 8.21830350 |
| 5.97764501  | 11.29100580 | 8.46940917 |
| 9.17558472  | 9.27867926  | 7.37933031 |
| 2.20255366  | 4.26567227  | 7.16546798 |
| 7.19509273  | 4.29086580  | 7.10172255 |
| 2.19709375  | 12.34705608 | 3.63401932 |
| 8.46916562  | 11.92029416 | 7.14249721 |
| -0.35572870 | 6.71685262  | 6.28334445 |
| 4.65120973  | 6.78222069  | 6.29881165 |
| 1.72759126  | 1.62824992  | 6.18537483 |
| 4.20470810  | 3.13713545  | 5.28995603 |
| 2.16833265  | 8.27841187  | 5.57924192 |
| 7.16166570  | 8.28568146  | 5.58455765 |
| 6.71020499  | 1.60826327  | 6.14910469 |
| 9.21156683  | 3.11585955  | 5.28511228 |
| 4.67397575  | 10.80383781 | 4.26435020 |
| -0.31420405 | 10.78972761 | 4.25993989 |
| 6.73172701  | 5.68166456  | 4.02062323 |
| 1.72451348  | 5.68313488  | 4.01354844 |
| 7.18203953  | 12.34538810 | 3.64071268 |
| 3.43886465  | 11.95557171 | 7.18487884 |
| 9.22190158  | 7.20036093  | 3.32725996 |
| 4.23768087  | 7.20002961  | 3.32730191 |
| 5.47292232  | 2.23055553  | 2.34193015 |
| 0.48302215  | 2.23055553  | 2.34193015 |
| 6.73540354  | 9.72874641  | 2.00704742 |

|             |             |            |
|-------------|-------------|------------|
| 1.74550355  | 9.72874641  | 2.00704742 |
| 7.98876715  | 3.77819967  | 1.47019899 |
| 2.99886727  | 3.77819967  | 1.47019899 |
| 9.21347809  | 11.29064846 | 1.28800344 |
| 4.22357798  | 11.29064846 | 1.28800344 |
| 5.52626467  | 6.13002825  | 0.45987183 |
| 0.53636485  | 6.13002825  | 0.45987183 |
| 7.45328903  | 1.12937152  | 0.40848067 |
| 2.46338916  | 1.12937152  | 0.40848067 |
| 4.75647831  | 8.73880577  | 0.18583304 |
| -0.23342146 | 8.73880577  | 0.18583304 |
| 9.23566199  | 2.31409684  | 9.09892829 |
| 6.22197033  | 11.38658707 | 9.62766713 |
| 9.58958144  | 4.54503290  | 8.96493035 |
| 1.61490611  | 7.35948153  | 9.58043392 |
| 6.56520366  | 7.27824265  | 9.55637624 |
| 4.76696819  | 2.45837236  | 9.39050950 |
| 2.52292688  | 10.28767186 | 7.18703107 |
| 0.02794403  | 10.88727041 | 6.88204113 |
| 3.16926794  | 7.79640079  | 7.12582994 |
| 8.16253123  | 7.77442893  | 7.12707471 |
| 5.75186724  | 2.19247999  | 4.50644862 |
| 7.58328486  | 0.14201443  | 7.10630689 |
| 3.86774145  | 5.17806939  | 6.98648202 |
| 8.88461932  | 5.21846432  | 7.23621724 |
| 3.20416495  | 2.72247277  | 6.92106489 |
| 8.20163823  | 2.68775819  | 6.93915120 |
| 0.70361033  | 8.30301412  | 6.93830811 |
| 5.69335917  | 8.31674417  | 6.94006610 |
| 5.00618986  | 10.93759827 | 6.98717703 |
| 7.53816434  | 10.27559713 | 7.18457984 |
| 1.40137085  | 5.91477652  | 6.76052617 |
| 6.34493498  | 5.90905020  | 6.78896666 |
| 0.68980083  | 3.28657181  | 6.72402453 |
| 5.67972749  | 3.28508717  | 6.71539998 |
| 0.68899260  | 12.40895163 | 4.88419079 |
| 4.99092917  | 0.89964734  | 6.68985123 |
| 3.24553407  | 11.76199587 | 5.18843813 |
| 8.24019290  | 11.74935040 | 5.17099193 |
| 8.87654366  | 9.23537679  | 5.11521849 |
| 3.89570904  | 9.24427680  | 5.12194963 |
| 7.53780791  | 4.22914209  | 5.08962424 |
| 2.52043495  | 4.22316811  | 5.03542656 |
| 8.19078022  | 6.76062306  | 4.90733219 |

|             |             |            |
|-------------|-------------|------------|
| 3.20699822  | 6.75468215  | 4.91312488 |
| 5.67984378  | 12.41535466 | 4.92262987 |
| 3.22903113  | 1.47030388  | 4.84636017 |
| 0.76399858  | 2.18330623  | 4.50649405 |
| 0.01841158  | 0.86500732  | 6.64461643 |
| 1.40851809  | 9.88817226  | 4.82635265 |
| 6.39246308  | 9.90486103  | 4.84592804 |
| 5.02510678  | 4.85171926  | 4.72863903 |
| 0.01491055  | 4.86518865  | 4.77969980 |
| 0.71996169  | 7.28616548  | 4.69565993 |
| 5.71227234  | 7.29324826  | 4.69576031 |
| 8.22498608  | 1.46544913  | 4.84722857 |
| 2.51775693  | 0.08519379  | 7.05789382 |
| 8.92724419  | 3.16928101  | 3.13275409 |
| 3.93734455  | 3.16928101  | 3.13275409 |
| 9.65447807  | 0.51179242  | 2.92767382 |
| 4.66457796  | 0.51179242  | 2.92767382 |
| 8.19081593  | 10.75315189 | 2.92137337 |
| 3.20091629  | 10.75315189 | 2.92137337 |
| 7.52427816  | 8.16568470  | 2.89047265 |
| 2.53437829  | 8.16568470  | 2.89047265 |
| 6.46140337  | 3.88992119  | 2.81003308 |
| 1.47150326  | 3.88992119  | 2.81003308 |
| 8.23615360  | 5.59719324  | 2.75910425 |
| 3.24625349  | 5.59719324  | 2.75910425 |
| 5.72548342  | 11.29866314 | 2.69921899 |
| 0.73558354  | 11.29866314 | 2.69921899 |
| 5.02271366  | 8.84247589  | 2.64073300 |
| 0.03281343  | 8.84247589  | 2.64073300 |
| 7.16234589  | 1.15467191  | 2.58495903 |
| 2.17244577  | 1.15467191  | 2.58495903 |
| 5.69094276  | 6.28061676  | 2.47308970 |
| 0.70104283  | 6.28061676  | 2.47308970 |
| 4.72644854  | 4.52631235  | 0.98044425 |
| -0.26345146 | 4.52631235  | 0.98044425 |
| 8.98416233  | 2.08401227  | 0.94984233 |
| 3.99426270  | 2.08401227  | 0.94984233 |
| 7.49692297  | 12.16127491 | 0.88189071 |
| 2.50702286  | 12.16127491 | 0.88189071 |
| 8.92881203  | 7.14167833  | 0.77916235 |
| 3.93891239  | 7.14167833  | 0.77916235 |
| 8.23179626  | 9.65808487  | 0.74752367 |
| 3.24189639  | 9.65808487  | 0.74752367 |
| 6.50168800  | 2.71004343  | 0.73384589 |



|            |             |            |
|------------|-------------|------------|
| 1.51178777 | 2.71004343  | 0.73384589 |
| 5.78449345 | 0.24636792  | 0.66762453 |
| 0.79459333 | 0.24636792  | 0.66762453 |
| 6.40908241 | 7.83185196  | 0.60482943 |
| 1.41918242 | 7.83185196  | 0.60482943 |
| 7.18588972 | 5.31081581  | 0.60368013 |
| 2.19598985 | 5.31081581  | 0.60368013 |
| 5.68450737 | 10.28863907 | 0.50651002 |
| 0.69460732 | 10.28863907 | 0.50651002 |

# CO<sub>2</sub>+H

1.000000000000

|             |             |             |
|-------------|-------------|-------------|
| 9.97980000  | 0.00000000  | 0.00000000  |
| -0.76395804 | 12.66177393 | 0.00000000  |
| 0.00000004  | 0.00000004  | 19.64040000 |

| H | C  | O | Fe |
|---|----|---|----|
| 2 | 41 | 6 | 80 |

Cart

|             |             |            |
|-------------|-------------|------------|
| 8.59901612  | 1.37456055  | 7.84334952 |
| 1.21326793  | 11.30609906 | 7.97464498 |
| 4.17636586  | 9.29697228  | 7.37927821 |
| 0.02890240  | 3.55670682  | 8.77111188 |
| 1.77459772  | 7.57059547  | 8.41810213 |
| 6.79510654  | 7.45637551  | 8.39759111 |
| 4.60568820  | 2.63033479  | 8.21185906 |
| 5.96200280  | 11.34694191 | 8.46802208 |
| 9.17007501  | 9.27032279  | 7.37851092 |
| 2.20559667  | 4.27671653  | 7.18185386 |
| 7.19328468  | 4.26367793  | 7.10802842 |
| 2.19328600  | 12.34658154 | 3.63851717 |
| 8.45377880  | 11.89860958 | 7.12792004 |
| -0.35602393 | 6.70382966  | 6.27697310 |
| 4.64668234  | 6.77589550  | 6.28848675 |
| 1.72016990  | 1.61189503  | 6.19592909 |
| 4.19627197  | 3.14006471  | 5.27530121 |
| 2.16618634  | 8.28257718  | 5.57856228 |
| 7.15951060  | 8.28846652  | 5.58693957 |
| 6.67699200  | 1.56495949  | 6.13365160 |
| 9.19818544  | 3.12880774  | 5.29697527 |
| 4.66974140  | 10.80622070 | 4.26708043 |
| -0.31280275 | 10.79797428 | 4.26257787 |
| 6.72554420  | 5.69168329  | 4.01657182 |
| 1.72200238  | 5.68562911  | 4.01180215 |
| 7.17544830  | 12.33980915 | 3.63424941 |

|             |             |            |
|-------------|-------------|------------|
| 3.42508166  | 11.94964012 | 7.19318732 |
| 9.22066330  | 7.20119155  | 3.32292497 |
| 4.23523046  | 7.20041927  | 3.32179810 |
| 5.47292232  | 2.23055553  | 2.34193015 |
| 0.48302215  | 2.23055553  | 2.34193015 |
| 6.73540354  | 9.72874641  | 2.00704742 |
| 1.74550355  | 9.72874641  | 2.00704742 |
| 7.98876715  | 3.77819967  | 1.47019899 |
| 2.99886727  | 3.77819967  | 1.47019899 |
| 9.21347809  | 11.29064846 | 1.28800344 |
| 4.22357798  | 11.29064846 | 1.28800344 |
| 5.52626467  | 6.13002825  | 0.45987183 |
| 0.53636485  | 6.13002825  | 0.45987183 |
| 7.45328903  | 1.12937152  | 0.40848067 |
| 2.46338916  | 1.12937152  | 0.40848067 |
| 4.75647831  | 8.73880577  | 0.18583304 |
| -0.23342146 | 8.73880577  | 0.18583304 |
| 0.47158542  | 2.62834379  | 9.42262619 |
| 6.18799829  | 11.42560813 | 9.63214107 |
| 9.42097068  | 4.65306201  | 9.02558374 |
| 1.59753596  | 7.34170153  | 9.57230844 |
| 6.55605143  | 7.23958646  | 9.54547867 |
| 4.74977688  | 2.47829728  | 9.38552170 |
| 2.51487824  | 10.27940052 | 7.19621841 |
| 0.01926575  | 10.87855518 | 6.87451311 |
| 3.16244197  | 7.79210960  | 7.12479183 |
| 8.15773830  | 7.76677912  | 7.12189697 |
| 5.74433008  | 2.19530219  | 4.50093060 |
| 7.57352386  | 0.11836602  | 7.12804302 |
| 3.86665688  | 5.18123351  | 6.99505088 |
| 8.87319567  | 5.17816670  | 7.18593977 |
| 3.19675541  | 2.72890705  | 6.91025890 |
| 8.13233696  | 2.66043786  | 6.87295743 |
| 0.69656780  | 8.29841206  | 6.93291314 |
| 5.68404484  | 8.30702969  | 6.94074025 |
| 4.99123797  | 10.93012240 | 6.98931637 |
| 7.52286239  | 10.25892004 | 7.17141727 |
| 1.39902206  | 5.91603132  | 6.75741931 |
| 6.34281159  | 5.89714190  | 6.78836663 |
| 0.68421955  | 3.28890499  | 6.77699765 |
| 5.66052466  | 3.28452724  | 6.70469763 |
| 0.68495907  | 12.42192244 | 4.89321265 |
| 4.95905590  | 0.89928298  | 6.68878528 |
| 3.23780201  | 11.75964126 | 5.19397977 |

|             |             |            |
|-------------|-------------|------------|
| 8.23710678  | 11.75950067 | 5.16976987 |
| 8.87389780  | 9.23443405  | 5.10096204 |
| 3.89343928  | 9.24349683  | 5.12040282 |
| 7.52651210  | 4.23814496  | 5.06899304 |
| 2.50639989  | 4.22514504  | 5.04297518 |
| 8.18965831  | 6.76238226  | 4.90404311 |
| 3.20339603  | 6.75853554  | 4.90848824 |
| 5.67273736  | 12.41312237 | 4.92654994 |
| 3.21854977  | 1.47075927  | 4.84398250 |
| 0.75054167  | 2.18844242  | 4.53186323 |
| -0.00867734 | 0.87650560  | 6.69921181 |
| 1.40523741  | 9.89222960  | 4.82625551 |
| 6.38837956  | 9.90646098  | 4.84820605 |
| 5.01227270  | 4.86212572  | 4.73163592 |
| 0.00929159  | 4.86713437  | 4.77987314 |
| 0.71936318  | 7.29245189  | 4.69043850 |
| 5.71083338  | 7.30034676  | 4.69222816 |
| 8.21599708  | 1.45636070  | 4.81836721 |
| 2.50174995  | 0.07883338  | 7.07540176 |
| 8.92724419  | 3.16928101  | 3.13275409 |
| 3.93734455  | 3.16928101  | 3.13275409 |
| 9.65447807  | 0.51179242  | 2.92767382 |
| 4.66457796  | 0.51179242  | 2.92767382 |
| 8.19081593  | 10.75315189 | 2.92137337 |
| 3.20091629  | 10.75315189 | 2.92137337 |
| 7.52427816  | 8.16568470  | 2.89047265 |
| 2.53437829  | 8.16568470  | 2.89047265 |
| 6.46140337  | 3.88992119  | 2.81003308 |
| 1.47150326  | 3.88992119  | 2.81003308 |
| 8.23615360  | 5.59719324  | 2.75910425 |
| 3.24625349  | 5.59719324  | 2.75910425 |
| 5.72548342  | 11.29866314 | 2.69921899 |
| 0.73558354  | 11.29866314 | 2.69921899 |
| 5.02271366  | 8.84247589  | 2.64073300 |
| 0.03281343  | 8.84247589  | 2.64073300 |
| 7.16234589  | 1.15467191  | 2.58495903 |
| 2.17244577  | 1.15467191  | 2.58495903 |
| 5.69094276  | 6.28061676  | 2.47308970 |
| 0.70104283  | 6.28061676  | 2.47308970 |
| 4.72644854  | 4.52631235  | 0.98044425 |
| -0.26345146 | 4.52631235  | 0.98044425 |
| 8.98416233  | 2.08401227  | 0.94984233 |
| 3.99426270  | 2.08401227  | 0.94984233 |
| 7.49692297  | 12.16127491 | 0.88189071 |

|            |             |            |
|------------|-------------|------------|
| 2.50702286 | 12.16127491 | 0.88189071 |
| 8.92881203 | 7.14167833  | 0.77916235 |
| 3.93891239 | 7.14167833  | 0.77916235 |
| 8.23179626 | 9.65808487  | 0.74752367 |
| 3.24189639 | 9.65808487  | 0.74752367 |
| 6.50168800 | 2.71004343  | 0.73384589 |
| 1.51178777 | 2.71004343  | 0.73384589 |
| 5.78449345 | 0.24636792  | 0.66762453 |
| 0.79459333 | 0.24636792  | 0.66762453 |
| 6.40908241 | 7.83185196  | 0.60482943 |
| 1.41918242 | 7.83185196  | 0.60482943 |
| 7.18588972 | 5.31081581  | 0.60368013 |
| 2.19598985 | 5.31081581  | 0.60368013 |
| 5.68450737 | 10.28863907 | 0.50651002 |
| 0.69460732 | 10.28863907 | 0.50651002 |

# C<sub>Cv</sub>+CH<sub>2</sub>

1.000000000000

|             |             |             |    |
|-------------|-------------|-------------|----|
| 9.97980000  | 0.00000000  | 0.00000000  |    |
| -0.76395804 | 12.66177393 | 0.00000000  |    |
| 0.00000004  | 0.00000004  | 19.64040000 |    |
| H           | C           | O           | Fe |
| 3           | 41          | 4           | 80 |

Cart

|             |             |            |
|-------------|-------------|------------|
| 1.09144800  | 10.61388373 | 9.33561119 |
| 1.28865803  | 12.31859452 | 8.90737584 |
| 6.23838558  | 11.33134896 | 7.96057078 |
| 1.18039521  | 11.27673069 | 8.45835435 |
| 4.60349101  | 2.61814770  | 8.22288996 |
| 9.59901900  | 2.59386510  | 8.21285600 |
| 4.17177203  | 9.31077546  | 7.39627184 |
| 6.82364527  | 7.57502667  | 8.43670546 |
| 1.74816888  | 7.62572243  | 8.40734586 |
| 9.19421045  | 9.29935189  | 7.36585338 |
| 2.19246154  | 4.25978008  | 7.21096567 |
| 7.17840645  | 4.26622411  | 7.20682077 |
| 3.47897297  | 11.95833219 | 7.16784026 |
| 8.44981191  | 11.95978402 | 7.19107489 |
| -0.33180838 | 6.76296842  | 6.28763366 |
| 4.65155989  | 6.77923250  | 6.31402910 |
| 1.74967927  | 1.61021877  | 6.16825055 |
| 6.73068585  | 1.62317223  | 6.17642252 |
| 2.17147350  | 8.28558061  | 5.56994845 |

|             |             |            |
|-------------|-------------|------------|
| 7.16235518  | 8.28354008  | 5.59637304 |
| 9.19488278  | 3.14073502  | 5.29339633 |
| 4.20249452  | 3.13632844  | 5.29456114 |
| 4.67342109  | 10.80342895 | 4.26611574 |
| -0.31666066 | 10.79759695 | 4.25899182 |
| 6.72218921  | 5.70026992  | 4.01217118 |
| 1.73350742  | 5.69493947  | 4.00947284 |
| 7.18229078  | 12.34705978 | 3.63858802 |
| 2.19324268  | 12.34571971 | 3.64177982 |
| 9.22707015  | 7.20174316  | 3.32675250 |
| 4.23984592  | 7.20101786  | 3.33569732 |
| 5.47292232  | 2.23055553  | 2.34193015 |
| 0.48302215  | 2.23055553  | 2.34193015 |
| 6.73540354  | 9.72874641  | 2.00704742 |
| 1.74550355  | 9.72874641  | 2.00704742 |
| 7.98876715  | 3.77819967  | 1.47019899 |
| 2.99886727  | 3.77819967  | 1.47019899 |
| 9.21347809  | 11.29064846 | 1.28800344 |
| 4.22357798  | 11.29064846 | 1.28800344 |
| 5.52626467  | 6.13002825  | 0.45987183 |
| 0.53636485  | 6.13002825  | 0.45987183 |
| 7.45328903  | 1.12937152  | 0.40848067 |
| 2.46338916  | 1.12937152  | 0.40848067 |
| 4.75647831  | 8.73880577  | 0.18583304 |
| -0.23342146 | 8.73880577  | 0.18583304 |
| 1.60361897  | 7.42048474  | 9.57553981 |
| 4.72668979  | 2.44489956  | 9.39907285 |
| 9.72436838  | 2.39497053  | 9.38390831 |
| 6.59446257  | 7.38838668  | 9.59023056 |
| 2.52397304  | 10.33125893 | 7.30326362 |
| 0.01414593  | 10.93483115 | 6.97025437 |
| 3.16712976  | 7.80994927  | 7.12150424 |
| 8.16785700  | 7.78880112  | 7.13162234 |
| 0.68598693  | 12.40962897 | 4.90717088 |
| 7.52784839  | 0.08927183  | 7.05580348 |
| 3.85990747  | 5.17864497  | 6.99858614 |
| 8.84716926  | 5.17888943  | 7.00240783 |
| 3.20653376  | 2.72929316  | 6.91664048 |
| 8.19485181  | 2.73126861  | 6.91524622 |
| 0.70342051  | 8.30469551  | 6.92013356 |
| 5.69533056  | 8.33056044  | 6.96008730 |
| 5.00540799  | 10.90640924 | 6.90373793 |
| 7.52957708  | 10.28806859 | 7.19167261 |
| 1.37702212  | 5.89374151  | 6.79387026 |

|            |             |            |
|------------|-------------|------------|
| 6.36537870 | 5.90757456  | 6.80725104 |
| 0.69415571 | 3.28107093  | 6.73650763 |
| 5.68343369 | 3.28257237  | 6.73899447 |
| 0.00922496 | 0.90407081  | 6.67394380 |
| 5.00587614 | 0.90242356  | 6.69527284 |
| 3.24356903 | 11.75515746 | 5.19287713 |
| 8.23567568 | 11.76115155 | 5.18701590 |
| 8.88552645 | 9.24264841  | 5.12319571 |
| 3.89143918 | 9.24489766  | 5.10981597 |
| 7.50363125 | 4.23754887  | 5.04218033 |
| 2.51490322 | 4.23263151  | 5.04142025 |
| 8.19775261 | 6.76532155  | 4.90999733 |
| 3.20922217 | 6.75852699  | 4.91602005 |
| 5.67431276 | 12.41619290 | 4.89653330 |
| 2.52770950 | 0.07605989  | 7.07719933 |
| 3.23514225 | 1.46191763  | 4.84651467 |
| 8.22000356 | 1.47133905  | 4.84372681 |
| 1.40244404 | 9.91854665  | 4.87145402 |
| 6.39582374 | 9.89232719  | 4.83111848 |
| 5.01386911 | 4.85618356  | 4.74119048 |
| 0.02242623 | 4.85983357  | 4.74231715 |
| 0.72756292 | 7.28878681  | 4.68956031 |
| 5.71343289 | 7.29113823  | 4.71014763 |
| 5.74860331 | 2.18989295  | 4.51682238 |
| 0.76118260 | 2.19067702  | 4.51370867 |
| 8.92724419 | 3.16928101  | 3.13275409 |
| 3.93734455 | 3.16928101  | 3.13275409 |
| 9.65447807 | 0.51179242  | 2.92767382 |
| 4.66457796 | 0.51179242  | 2.92767382 |
| 8.19081593 | 10.75315189 | 2.92137337 |
| 3.20091629 | 10.75315189 | 2.92137337 |
| 7.52427816 | 8.16568470  | 2.89047265 |
| 2.53437829 | 8.16568470  | 2.89047265 |
| 6.46140337 | 3.88992119  | 2.81003308 |
| 1.47150326 | 3.88992119  | 2.81003308 |
| 8.23615360 | 5.59719324  | 2.75910425 |
| 3.24625349 | 5.59719324  | 2.75910425 |
| 5.72548342 | 11.29866314 | 2.69921899 |
| 0.73558354 | 11.29866314 | 2.69921899 |
| 5.02271366 | 8.84247589  | 2.64073300 |
| 0.03281343 | 8.84247589  | 2.64073300 |
| 7.16234589 | 1.15467191  | 2.58495903 |
| 2.17244577 | 1.15467191  | 2.58495903 |
| 5.69094276 | 6.28061676  | 2.47308970 |

|             |             |            |
|-------------|-------------|------------|
| 0.70104283  | 6.28061676  | 2.47308970 |
| 4.72644854  | 4.52631235  | 0.98044425 |
| -0.26345146 | 4.52631235  | 0.98044425 |
| 8.98416233  | 2.08401227  | 0.94984233 |
| 3.99426270  | 2.08401227  | 0.94984233 |
| 7.49692297  | 12.16127491 | 0.88189071 |
| 2.50702286  | 12.16127491 | 0.88189071 |
| 8.92881203  | 7.14167833  | 0.77916235 |
| 3.93891239  | 7.14167833  | 0.77916235 |
| 8.23179626  | 9.65808487  | 0.74752367 |
| 3.24189639  | 9.65808487  | 0.74752367 |
| 6.50168800  | 2.71004343  | 0.73384589 |
| 1.51178777  | 2.71004343  | 0.73384589 |
| 5.78449345  | 0.24636792  | 0.66762453 |
| 0.79459333  | 0.24636792  | 0.66762453 |
| 6.40908241  | 7.83185196  | 0.60482943 |
| 1.41918242  | 7.83185196  | 0.60482943 |
| 7.18588972  | 5.31081581  | 0.60368013 |
| 2.19598985  | 5.31081581  | 0.60368013 |
| 5.68450737  | 10.28863907 | 0.50651002 |
| 0.69460732  | 10.28863907 | 0.50651002 |

# TS for  $C_{cv}+CH_2 \rightarrow CCH_2_{cv}$

1.000000000000

|             |             |             |    |
|-------------|-------------|-------------|----|
| 9.97980000  | 0.00000000  | 0.00000000  |    |
| -0.76395804 | 12.66177393 | 0.00000000  |    |
| 0.00000004  | 0.00000004  | 19.64040000 |    |
| H           | C           | O           | Fe |
| 3           | 41          | 4           | 80 |

Cart

|            |             |            |
|------------|-------------|------------|
| 0.39059981 | 10.79044388 | 8.80388866 |
| 1.06989406 | 9.26310089  | 9.30874347 |
| 6.23586445 | 11.30221672 | 7.97190111 |
| 0.87102559 | 9.85308914  | 8.40428152 |
| 4.59507110 | 2.60284073  | 8.22807918 |
| 9.60211249 | 2.61611956  | 8.21096844 |
| 4.16864007 | 9.27806950  | 7.41755503 |
| 6.77101071 | 7.61288323  | 8.43675611 |
| 2.06555143 | 7.04894633  | 8.40585405 |
| 9.21989283 | 9.31969101  | 7.55870281 |
| 2.18459033 | 4.26265601  | 7.17599875 |
| 7.18514551 | 4.26267454  | 7.20479422 |
| 3.38821936 | 11.90755166 | 7.22238814 |

|             |             |            |
|-------------|-------------|------------|
| 8.42262424  | 11.96668830 | 7.14562110 |
| -0.31688751 | 6.78036400  | 6.32266970 |
| 4.67986432  | 6.75302909  | 6.28457915 |
| 1.73077071  | 1.64515781  | 6.14232588 |
| 6.71773004  | 1.60899512  | 6.18579613 |
| 2.17757282  | 8.28704838  | 5.60592270 |
| 7.17876414  | 8.31488344  | 5.62628127 |
| 9.18854256  | 3.13834158  | 5.28856457 |
| 4.20822487  | 3.14869287  | 5.30162024 |
| 4.66478264  | 10.79651778 | 4.26546467 |
| -0.31246798 | 10.83019524 | 4.27534645 |
| 6.72976337  | 5.71072349  | 4.01464586 |
| 1.73528112  | 5.70352304  | 4.01564884 |
| 7.17242245  | 12.34728569 | 3.64026554 |
| 2.19806718  | 12.34859066 | 3.64029759 |
| 9.23275540  | 7.20627952  | 3.35076123 |
| 4.24104221  | 7.20288681  | 3.33275589 |
| 5.47292232  | 2.23055553  | 2.34193015 |
| 0.48302215  | 2.23055553  | 2.34193015 |
| 6.73540354  | 9.72874641  | 2.00704742 |
| 1.74550355  | 9.72874641  | 2.00704742 |
| 7.98876715  | 3.77819967  | 1.47019899 |
| 2.99886727  | 3.77819967  | 1.47019899 |
| 9.21347809  | 11.29064846 | 1.28800344 |
| 4.22357798  | 11.29064846 | 1.28800344 |
| 5.52626467  | 6.13002825  | 0.45987183 |
| 0.53636485  | 6.13002825  | 0.45987183 |
| 7.45328903  | 1.12937152  | 0.40848067 |
| 2.46338916  | 1.12937152  | 0.40848067 |
| 4.75647831  | 8.73880577  | 0.18583304 |
| -0.23342146 | 8.73880577  | 0.18583304 |
| 1.73728583  | 6.93935166  | 9.54887373 |
| 4.72686985  | 2.43242842  | 9.40404808 |
| 9.73016474  | 2.43711487  | 9.38686551 |
| 6.64377651  | 7.40960635  | 9.60614398 |
| 2.49554605  | 10.23332745 | 7.23250321 |
| 0.00249016  | 10.95895871 | 6.82898504 |
| 3.22234487  | 7.74079095  | 7.13184901 |
| 8.20099751  | 7.83081172  | 7.16211844 |
| 0.68803045  | 12.43998574 | 4.87774847 |
| 7.49456516  | 0.07131691  | 7.06751919 |
| 3.87068970  | 5.17539585  | 7.01859343 |
| 8.86205649  | 5.17737134  | 6.99256404 |
| 3.20764554  | 2.72940890  | 6.91729107 |



|            |             |            |
|------------|-------------|------------|
| 8.18885199 | 2.72637072  | 6.91481122 |
| 0.70405723 | 8.36548880  | 6.94953895 |
| 5.71393960 | 8.32422131  | 6.96799174 |
| 4.96001140 | 10.90699697 | 6.93859951 |
| 7.52688826 | 10.27368234 | 7.16231421 |
| 1.40598458 | 5.92049160  | 6.81991682 |
| 6.39420804 | 5.90924566  | 6.79800230 |
| 0.68393334 | 3.28617183  | 6.72442821 |
| 5.68501336 | 3.26875637  | 6.74611606 |
| 0.00981734 | 0.90479524  | 6.67433055 |
| 4.98723043 | 0.86153942  | 6.72317020 |
| 3.22891933 | 11.74100791 | 5.20212455 |
| 8.22806668 | 11.77707889 | 5.16834416 |
| 8.88847337 | 9.23497902  | 5.06427832 |
| 3.88680181 | 9.24197053  | 5.13014425 |
| 7.50615969 | 4.24240472  | 5.04227176 |
| 2.51557666 | 4.23692906  | 5.04202053 |
| 8.19788428 | 6.77241368  | 4.93815539 |
| 3.21197029 | 6.76740128  | 4.90702885 |
| 5.65513791 | 12.41834157 | 4.90500040 |
| 2.52354920 | 0.11638350  | 7.01660054 |
| 3.24067697 | 1.48221428  | 4.83536372 |
| 8.20770257 | 1.47360931  | 4.84169126 |
| 1.40157757 | 9.90050733  | 4.81569000 |
| 6.39523199 | 9.90253564  | 4.83017523 |
| 5.01978530 | 4.86682664  | 4.75070261 |
| 0.02183584 | 4.85902823  | 4.72827098 |
| 0.73037396 | 7.28604318  | 4.72152092 |
| 5.72605627 | 7.31355403  | 4.70388338 |
| 5.74600571 | 2.19104486  | 4.52167544 |
| 0.75367134 | 2.19789234  | 4.50339737 |
| 8.92724419 | 3.16928101  | 3.13275409 |
| 3.93734455 | 3.16928101  | 3.13275409 |
| 9.65447807 | 0.51179242  | 2.92767382 |
| 4.66457796 | 0.51179242  | 2.92767382 |
| 8.19081593 | 10.75315189 | 2.92137337 |
| 3.20091629 | 10.75315189 | 2.92137337 |
| 7.52427816 | 8.16568470  | 2.89047265 |
| 2.53437829 | 8.16568470  | 2.89047265 |
| 6.46140337 | 3.88992119  | 2.81003308 |
| 1.47150326 | 3.88992119  | 2.81003308 |
| 8.23615360 | 5.59719324  | 2.75910425 |
| 3.24625349 | 5.59719324  | 2.75910425 |
| 5.72548342 | 11.29866314 | 2.69921899 |

|             |             |            |
|-------------|-------------|------------|
| 0.73558354  | 11.29866314 | 2.69921899 |
| 5.02271366  | 8.84247589  | 2.64073300 |
| 0.03281343  | 8.84247589  | 2.64073300 |
| 7.16234589  | 1.15467191  | 2.58495903 |
| 2.17244577  | 1.15467191  | 2.58495903 |
| 5.69094276  | 6.28061676  | 2.47308970 |
| 0.70104283  | 6.28061676  | 2.47308970 |
| 4.72644854  | 4.52631235  | 0.98044425 |
| -0.26345146 | 4.52631235  | 0.98044425 |
| 8.98416233  | 2.08401227  | 0.94984233 |
| 3.99426270  | 2.08401227  | 0.94984233 |
| 7.49692297  | 12.16127491 | 0.88189071 |
| 2.50702286  | 12.16127491 | 0.88189071 |
| 8.92881203  | 7.14167833  | 0.77916235 |
| 3.93891239  | 7.14167833  | 0.77916235 |
| 8.23179626  | 9.65808487  | 0.74752367 |
| 3.24189639  | 9.65808487  | 0.74752367 |
| 6.50168800  | 2.71004343  | 0.73384589 |
| 1.51178777  | 2.71004343  | 0.73384589 |
| 5.78449345  | 0.24636792  | 0.66762453 |
| 0.79459333  | 0.24636792  | 0.66762453 |
| 6.40908241  | 7.83185196  | 0.60482943 |
| 1.41918242  | 7.83185196  | 0.60482943 |
| 7.18588972  | 5.31081581  | 0.60368013 |
| 2.19598985  | 5.31081581  | 0.60368013 |
| 5.68450737  | 10.28863907 | 0.50651002 |
| 0.69460732  | 10.28863907 | 0.50651002 |

# C<sub>v</sub>+CH<sub>3</sub>

1.000000000000

|             |             |             |    |
|-------------|-------------|-------------|----|
| 9.97980000  | 0.00000000  | 0.00000000  |    |
| -0.76395804 | 12.66177393 | 0.00000000  |    |
| 0.00000004  | 0.00000004  | 19.64040000 |    |
| H           | C           | O           | Fe |
| 4           | 41          | 4           | 80 |

Cart

|            |             |            |
|------------|-------------|------------|
| 1.98439235 | 10.66705522 | 9.19559418 |
| 1.49281042 | 12.37214519 | 9.12288747 |
| 6.23885777 | 11.29956068 | 7.95583242 |
| 0.27425784 | 11.09396426 | 9.24997880 |
| 1.22426902 | 11.35101169 | 8.75580851 |
| 4.62353252 | 2.61109397  | 8.22421598 |
| 9.62266067 | 2.62585489  | 8.22639216 |

|             |             |            |
|-------------|-------------|------------|
| 4.18200819  | 9.29396190  | 7.37753711 |
| 1.78659685  | 7.48821451  | 8.39471036 |
| 6.77807817  | 7.55343344  | 8.41287025 |
| 9.17989773  | 9.28765865  | 7.36329320 |
| 2.20244041  | 4.25439671  | 7.19970814 |
| 7.19206577  | 4.25824909  | 7.20502255 |
| 3.45725910  | 11.95564807 | 7.15130417 |
| 8.44138562  | 11.95704750 | 7.18481531 |
| -0.33363629 | 6.75822061  | 6.29592736 |
| 4.65961799  | 6.76324250  | 6.30261791 |
| 1.75176638  | 1.59795991  | 6.17217394 |
| 6.74081834  | 1.61676443  | 6.17575582 |
| 2.17326311  | 8.27890486  | 5.59182720 |
| 7.16334704  | 8.28555908  | 5.58542201 |
| 9.20211317  | 3.13219709  | 5.30176764 |
| 4.21051762  | 3.13101141  | 5.29999785 |
| 4.67105370  | 10.80565139 | 4.26712224 |
| -0.31238647 | 10.79130295 | 4.25080503 |
| 6.72315252  | 5.69183371  | 4.01242442 |
| 1.73343076  | 5.69230814  | 4.01151158 |
| 7.18781826  | 12.34530206 | 3.64247328 |
| 2.19151803  | 12.34822774 | 3.64124090 |
| 9.22785057  | 7.20171628  | 3.33187539 |
| 4.23833882  | 7.20223349  | 3.33485302 |
| 5.47292232  | 2.23055553  | 2.34193015 |
| 0.48302215  | 2.23055553  | 2.34193015 |
| 6.73540354  | 9.72874641  | 2.00704742 |
| 1.74550355  | 9.72874641  | 2.00704742 |
| 7.98876715  | 3.77819967  | 1.47019899 |
| 2.99886727  | 3.77819967  | 1.47019899 |
| 9.21347809  | 11.29064846 | 1.28800344 |
| 4.22357798  | 11.29064846 | 1.28800344 |
| 5.52626467  | 6.13002825  | 0.45987183 |
| 0.53636485  | 6.13002825  | 0.45987183 |
| 7.45328903  | 1.12937152  | 0.40848067 |
| 2.46338916  | 1.12937152  | 0.40848067 |
| 4.75647831  | 8.73880577  | 0.18583304 |
| -0.23342146 | 8.73880577  | 0.18583304 |
| 6.58873208  | 7.33031574  | 9.56945976 |
| 4.75012516  | 2.43443468  | 9.39913942 |
| 9.76362585  | 2.45927688  | 9.40050531 |
| 1.59407395  | 7.23165954  | 9.54484160 |
| 2.52321484  | 10.28738346 | 7.20979371 |
| 0.04420778  | 10.93108381 | 6.99753840 |

|            |             |            |
|------------|-------------|------------|
| 3.17858673 | 7.77842004  | 7.12899691 |
| 8.16247455 | 7.78031946  | 7.12505148 |
| 0.68854661 | 12.40123283 | 4.91187970 |
| 7.51823091 | 0.07889436  | 7.05728881 |
| 3.87059937 | 5.16336068  | 6.99188418 |
| 8.86025357 | 5.16407927  | 6.99472805 |
| 3.21556560 | 2.71815191  | 6.91955880 |
| 8.20908025 | 2.72239610  | 6.92412803 |
| 0.70656864 | 8.29956604  | 6.94270019 |
| 5.69792674 | 8.31601354  | 6.94214126 |
| 4.99610919 | 10.90665007 | 6.89653085 |
| 7.53238263 | 10.28407389 | 7.17348643 |
| 1.38310617 | 5.88930920  | 6.78632394 |
| 6.37143669 | 5.89406244  | 6.79422410 |
| 0.70721990 | 3.27392243  | 6.73519500 |
| 5.69469048 | 3.27758587  | 6.74306003 |
| 0.01303144 | 0.89514837  | 6.68286654 |
| 5.00839101 | 0.89780501  | 6.68786169 |
| 3.23772544 | 11.75668302 | 5.18768089 |
| 8.24785866 | 11.75238896 | 5.18829852 |
| 8.88996583 | 9.23900264  | 5.11529451 |
| 3.89178390 | 9.23299519  | 5.09541891 |
| 7.51062085 | 4.22527556  | 5.03839565 |
| 2.52031087 | 4.22412583  | 5.03568356 |
| 8.19910627 | 6.75605136  | 4.91239813 |
| 3.21107134 | 6.75442763  | 4.91440982 |
| 5.67841156 | 12.41622093 | 4.89532459 |
| 2.51105742 | 0.07103585  | 7.10145109 |
| 3.23623185 | 1.46235077  | 4.84638166 |
| 8.22899654 | 1.46530683  | 4.84629874 |
| 1.40866576 | 9.89932033  | 4.85646424 |
| 6.39667549 | 9.89287513  | 4.82322016 |
| 5.01743356 | 4.84924774  | 4.74118186 |
| 0.02687546 | 4.85072230  | 4.74092760 |
| 0.72834758 | 7.28671421  | 4.69784773 |
| 5.71766778 | 7.28838462  | 4.70097153 |
| 5.75454260 | 2.18807739  | 4.51684992 |
| 0.76599577 | 2.18427482  | 4.51382606 |
| 8.92724419 | 3.16928101  | 3.13275409 |
| 3.93734455 | 3.16928101  | 3.13275409 |
| 9.65447807 | 0.51179242  | 2.92767382 |
| 4.66457796 | 0.51179242  | 2.92767382 |
| 8.19081593 | 10.75315189 | 2.92137337 |
| 3.20091629 | 10.75315189 | 2.92137337 |

|             |             |            |
|-------------|-------------|------------|
| 7.52427816  | 8.16568470  | 2.89047265 |
| 2.53437829  | 8.16568470  | 2.89047265 |
| 6.46140337  | 3.88992119  | 2.81003308 |
| 1.47150326  | 3.88992119  | 2.81003308 |
| 8.23615360  | 5.59719324  | 2.75910425 |
| 3.24625349  | 5.59719324  | 2.75910425 |
| 5.72548342  | 11.29866314 | 2.69921899 |
| 0.73558354  | 11.29866314 | 2.69921899 |
| 5.02271366  | 8.84247589  | 2.64073300 |
| 0.03281343  | 8.84247589  | 2.64073300 |
| 7.16234589  | 1.15467191  | 2.58495903 |
| 2.17244577  | 1.15467191  | 2.58495903 |
| 5.69094276  | 6.28061676  | 2.47308970 |
| 0.70104283  | 6.28061676  | 2.47308970 |
| 4.72644854  | 4.52631235  | 0.98044425 |
| -0.26345146 | 4.52631235  | 0.98044425 |
| 8.98416233  | 2.08401227  | 0.94984233 |
| 3.99426270  | 2.08401227  | 0.94984233 |
| 7.49692297  | 12.16127491 | 0.88189071 |
| 2.50702286  | 12.16127491 | 0.88189071 |
| 8.92881203  | 7.14167833  | 0.77916235 |
| 3.93891239  | 7.14167833  | 0.77916235 |
| 8.23179626  | 9.65808487  | 0.74752367 |
| 3.24189639  | 9.65808487  | 0.74752367 |
| 6.50168800  | 2.71004343  | 0.73384589 |
| 1.51178777  | 2.71004343  | 0.73384589 |
| 5.78449345  | 0.24636792  | 0.66762453 |
| 0.79459333  | 0.24636792  | 0.66762453 |
| 6.40908241  | 7.83185196  | 0.60482943 |
| 1.41918242  | 7.83185196  | 0.60482943 |
| 7.18588972  | 5.31081581  | 0.60368013 |
| 2.19598985  | 5.31081581  | 0.60368013 |
| 5.68450737  | 10.28863907 | 0.50651002 |
| 0.69460732  | 10.28863907 | 0.50651002 |

# TS for  $C_{cv}+CH_3 \rightarrow CCH_3_{cv}$

1.000000000000

|             |             |             |    |
|-------------|-------------|-------------|----|
| 9.97980000  | 0.00000000  | 0.00000000  |    |
| -0.76395804 | 12.66177393 | 0.00000000  |    |
| 0.00000004  | 0.00000004  | 19.64040000 |    |
| H           | C           | O           | Fe |
| 4           | 41          | 4           | 80 |

Cart

|             |             |            |
|-------------|-------------|------------|
| 0.45790337  | 9.57404061  | 9.63032027 |
| 0.37899729  | 11.36143719 | 9.40787164 |
| 6.22737419  | 11.30692222 | 7.97396415 |
| 8.84865665  | 10.43054803 | 9.67970344 |
| -0.13235971 | 10.40427463 | 9.23637298 |
| 4.60875865  | 2.59768575  | 8.22614352 |
| 9.60434695  | 2.59886823  | 8.22042045 |
| 4.18527403  | 9.27659862  | 7.40607748 |
| 1.79532395  | 7.52013777  | 8.40439032 |
| 6.83095144  | 7.63118519  | 8.46981165 |
| 9.24566021  | 9.28658488  | 7.59765420 |
| 2.20098825  | 4.24625062  | 7.20445012 |
| 7.18440362  | 4.25116948  | 7.20507737 |
| 3.40428852  | 11.91265736 | 7.20395150 |
| 8.42597041  | 11.93428388 | 7.16524645 |
| -0.33482318 | 6.77327016  | 6.30837840 |
| 4.67012994  | 6.75446155  | 6.31151790 |
| 1.73723607  | 1.62162079  | 6.16298809 |
| 6.72846141  | 1.60130608  | 6.18343973 |
| 2.17716031  | 8.29155108  | 5.59869303 |
| 7.18349327  | 8.31278952  | 5.64026881 |
| 9.19538162  | 3.13242405  | 5.29659488 |
| 4.20969384  | 3.13601081  | 5.30106206 |
| 4.67408987  | 10.80471762 | 4.26232343 |
| -0.30984696 | 10.80339054 | 4.24923590 |
| 6.72823334  | 5.70367019  | 4.01679561 |
| 1.73530272  | 5.69443852  | 4.01380126 |
| 7.18381116  | 12.34516316 | 3.64494674 |
| 2.19251374  | 12.34728729 | 3.64510441 |
| 9.22889484  | 7.20381477  | 3.34486019 |
| 4.24198687  | 7.20271502  | 3.34441530 |
| 5.47292232  | 2.23055553  | 2.34193015 |
| 0.48302215  | 2.23055553  | 2.34193015 |
| 6.73540354  | 9.72874641  | 2.00704742 |
| 1.74550355  | 9.72874641  | 2.00704742 |
| 7.98876715  | 3.77819967  | 1.47019899 |
| 2.99886727  | 3.77819967  | 1.47019899 |
| 9.21347809  | 11.29064846 | 1.28800344 |
| 4.22357798  | 11.29064846 | 1.28800344 |
| 5.52626467  | 6.13002825  | 0.45987183 |
| 0.53636485  | 6.13002825  | 0.45987183 |
| 7.45328903  | 1.12937152  | 0.40848067 |
| 2.46338916  | 1.12937152  | 0.40848067 |
| 4.75647831  | 8.73880577  | 0.18583304 |

|             |             |            |
|-------------|-------------|------------|
| -0.23342146 | 8.73880577  | 0.18583304 |
| 6.63395691  | 7.46462034  | 9.63389426 |
| 4.73982331  | 2.42272039  | 9.40138808 |
| 9.73735888  | 2.42251975  | 9.39559114 |
| 1.61370702  | 7.29279716  | 9.56484784 |
| 2.52600630  | 10.23031777 | 7.10465765 |
| -0.02431317 | 10.87470667 | 7.08837670 |
| 3.18689027  | 7.76820387  | 7.12964958 |
| 8.19736741  | 7.81753614  | 7.17283384 |
| 0.68741189  | 12.40225373 | 4.91713411 |
| 7.50556903  | 0.05915009  | 7.06381299 |
| 3.87280983  | 5.15738877  | 6.99574346 |
| 8.85950880  | 5.16483639  | 6.99492426 |
| 3.21312589  | 2.71389300  | 6.91852631 |
| 8.19724125  | 2.71625905  | 6.91952938 |
| 0.71300782  | 8.28393109  | 6.94328501 |
| 5.70645644  | 8.31120244  | 6.97230594 |
| 4.97955397  | 10.90046913 | 6.92475944 |
| 7.47598626  | 10.24438846 | 7.10211061 |
| 1.37813539  | 5.87547647  | 6.79243758 |
| 6.39147769  | 5.90030854  | 6.79482216 |
| 0.69622054  | 3.26848494  | 6.73669441 |
| 5.69083633  | 3.25806874  | 6.74147226 |
| 0.01783474  | 0.87581233  | 6.70208137 |
| 4.99408468  | 0.85894110  | 6.70742096 |
| 3.25366196  | 11.76254841 | 5.18547272 |
| 8.25391166  | 11.75401826 | 5.18605489 |
| 8.89906295  | 9.23423319  | 5.07666737 |
| 3.90096541  | 9.22199113  | 5.07496274 |
| 7.50730844  | 4.22988675  | 5.04018538 |
| 2.51647364  | 4.22335296  | 5.03997309 |
| 8.19548182  | 6.76763160  | 4.93368934 |
| 3.21152509  | 6.75212875  | 4.91839075 |
| 5.67613676  | 12.41207117 | 4.90295325 |
| 2.51344066  | 0.07273575  | 7.02775538 |
| 3.22997459  | 1.47309015  | 4.83476473 |
| 8.22215403  | 1.46104103  | 4.84601658 |
| 1.39709956  | 9.89906529  | 4.84500953 |
| 6.39498943  | 9.88078183  | 4.80159092 |
| 5.02099318  | 4.85545316  | 4.74435040 |
| 0.02443895  | 4.85181313  | 4.73874645 |
| 0.72874846  | 7.28711123  | 4.70041705 |
| 5.72485462  | 7.30418234  | 4.71179649 |
| 5.74908520  | 2.18220478  | 4.51910659 |

|             |             |            |
|-------------|-------------|------------|
| 0.75726987  | 2.18338610  | 4.51235519 |
| 8.92724419  | 3.16928101  | 3.13275409 |
| 3.93734455  | 3.16928101  | 3.13275409 |
| 9.65447807  | 0.51179242  | 2.92767382 |
| 4.66457796  | 0.51179242  | 2.92767382 |
| 8.19081593  | 10.75315189 | 2.92137337 |
| 3.20091629  | 10.75315189 | 2.92137337 |
| 7.52427816  | 8.16568470  | 2.89047265 |
| 2.53437829  | 8.16568470  | 2.89047265 |
| 6.46140337  | 3.88992119  | 2.81003308 |
| 1.47150326  | 3.88992119  | 2.81003308 |
| 8.23615360  | 5.59719324  | 2.75910425 |
| 3.24625349  | 5.59719324  | 2.75910425 |
| 5.72548342  | 11.29866314 | 2.69921899 |
| 0.73558354  | 11.29866314 | 2.69921899 |
| 5.02271366  | 8.84247589  | 2.64073300 |
| 0.03281343  | 8.84247589  | 2.64073300 |
| 7.16234589  | 1.15467191  | 2.58495903 |
| 2.17244577  | 1.15467191  | 2.58495903 |
| 5.69094276  | 6.28061676  | 2.47308970 |
| 0.70104283  | 6.28061676  | 2.47308970 |
| 4.72644854  | 4.52631235  | 0.98044425 |
| -0.26345146 | 4.52631235  | 0.98044425 |
| 8.98416233  | 2.08401227  | 0.94984233 |
| 3.99426270  | 2.08401227  | 0.94984233 |
| 7.49692297  | 12.16127491 | 0.88189071 |
| 2.50702286  | 12.16127491 | 0.88189071 |
| 8.92881203  | 7.14167833  | 0.77916235 |
| 3.93891239  | 7.14167833  | 0.77916235 |
| 8.23179626  | 9.65808487  | 0.74752367 |
| 3.24189639  | 9.65808487  | 0.74752367 |
| 6.50168800  | 2.71004343  | 0.73384589 |
| 1.51178777  | 2.71004343  | 0.73384589 |
| 5.78449345  | 0.24636792  | 0.66762453 |
| 0.79459333  | 0.24636792  | 0.66762453 |
| 6.40908241  | 7.83185196  | 0.60482943 |
| 1.41918242  | 7.83185196  | 0.60482943 |
| 7.18588972  | 5.31081581  | 0.60368013 |
| 2.19598985  | 5.31081581  | 0.60368013 |
| 5.68450737  | 10.28863907 | 0.50651002 |
| 0.69460732  | 10.28863907 | 0.50651002 |

# CH<sub>Cv</sub>+CH



1.000000000000

|             |             |             |    |
|-------------|-------------|-------------|----|
| 9.97980000  | 0.00000000  | 0.00000000  |    |
| -0.76395804 | 12.66177393 | 0.00000000  |    |
| 0.00000004  | 0.00000004  | 19.64040000 |    |
| H           | C           | O           | Fe |
| 3           | 41          | 4           | 80 |

Cart

|             |             |            |
|-------------|-------------|------------|
| 1.05934162  | 11.19466199 | 9.32351560 |
| 6.25838523  | 11.24373464 | 7.91136503 |
| 9.24416028  | 9.39126112  | 9.04872934 |
| 1.13462488  | 11.23321282 | 8.22521145 |
| 4.62812149  | 2.64585587  | 8.22591214 |
| 9.61949403  | 2.62099468  | 8.23083683 |
| 4.16907229  | 9.31079313  | 7.38274624 |
| 1.74042184  | 7.59391666  | 8.41898596 |
| 6.89626585  | 7.38611326  | 8.41335242 |
| 9.19437859  | 9.26121015  | 7.95577759 |
| 2.19825613  | 4.25652136  | 7.18864492 |
| 7.19792461  | 4.26975147  | 7.18668574 |
| 3.50334207  | 11.96546461 | 7.13397048 |
| 8.44338207  | 11.87447818 | 7.13119600 |
| -0.33633538 | 6.80380961  | 6.29706494 |
| 4.65310736  | 6.77101368  | 6.31757613 |
| 1.75143781  | 1.55763464  | 6.20820300 |
| 6.74552872  | 1.61521117  | 6.19237922 |
| 2.16717755  | 8.28535852  | 5.58512477 |
| 7.18960999  | 8.33884366  | 5.66234262 |
| 9.19999844  | 3.13990042  | 5.30288547 |
| 4.21256018  | 3.13444849  | 5.30004654 |
| 4.67442095  | 10.80466532 | 4.26783412 |
| -0.30367571 | 10.81128844 | 4.27988141 |
| 6.72215404  | 5.70400768  | 4.01523372 |
| 1.73530859  | 5.69303809  | 4.01410726 |
| 7.18214448  | 12.35084858 | 3.63094339 |
| 2.19120492  | 12.34993781 | 3.63930196 |
| 9.22981456  | 7.21250941  | 3.34840602 |
| 4.24237847  | 7.20056034  | 3.34433288 |
| 5.47292232  | 2.23055553  | 2.34193015 |
| 0.48302215  | 2.23055553  | 2.34193015 |
| 6.73540354  | 9.72874641  | 2.00704742 |
| 1.74550355  | 9.72874641  | 2.00704742 |
| 7.98876715  | 3.77819967  | 1.47019899 |
| 2.99886727  | 3.77819967  | 1.47019899 |
| 9.21347809  | 11.29064846 | 1.28800344 |

|             |             |            |
|-------------|-------------|------------|
| 4.22357798  | 11.29064846 | 1.28800344 |
| 5.52626467  | 6.13002825  | 0.45987183 |
| 0.53636485  | 6.13002825  | 0.45987183 |
| 7.45328903  | 1.12937152  | 0.40848067 |
| 2.46338916  | 1.12937152  | 0.40848067 |
| 4.75647831  | 8.73880577  | 0.18583304 |
| -0.23342146 | 8.73880577  | 0.18583304 |
| 6.61418716  | 7.12764340  | 9.54369439 |
| 4.75111116  | 2.48324948  | 9.40364702 |
| 9.75655337  | 2.46406671  | 9.40726419 |
| 1.59355767  | 7.34375173  | 9.57735021 |
| 2.51390455  | 10.32902609 | 7.25143692 |
| -0.01743949 | 10.80484670 | 6.86850340 |
| 3.15385011  | 7.81040617  | 7.12960909 |
| 8.20852279  | 7.80487979  | 7.15217147 |
| 0.69751747  | 12.41476315 | 4.91769735 |
| 7.53396485  | 0.04873886  | 7.04162692 |
| 3.86878459  | 5.16801359  | 6.99711734 |
| 8.87643824  | 5.17356082  | 6.98528848 |
| 3.20483470  | 2.70380150  | 6.92231795 |
| 8.21067257  | 2.72504272  | 6.92718351 |
| 0.65426025  | 8.34523747  | 6.96096519 |
| 5.69877011  | 8.31944958  | 6.97662391 |
| 5.00542455  | 10.89215138 | 6.86609641 |
| 7.55689348  | 10.18531489 | 7.09089043 |
| 1.37332710  | 5.89738994  | 6.79876184 |
| 6.38142262  | 5.91357415  | 6.80732551 |
| 0.70690958  | 3.25622443  | 6.73675427 |
| 5.69200416  | 3.29150857  | 6.74088966 |
| 0.00623826  | 0.85882743  | 6.71094391 |
| 5.02008490  | 0.90594493  | 6.67064475 |
| 3.25143343  | 11.76103045 | 5.17383099 |
| 8.23844795  | 11.75757131 | 5.16229054 |
| 8.86754121  | 9.18722564  | 4.96937820 |
| 3.89432077  | 9.23513610  | 5.09724673 |
| 7.50873669  | 4.23243993  | 5.03948779 |
| 2.52257609  | 4.22777379  | 5.04242652 |
| 8.18683822  | 6.75343133  | 4.92321432 |
| 3.21313519  | 6.75947301  | 4.92419708 |
| 5.67863534  | 12.42622130 | 4.88545892 |
| 2.53362877  | 0.00046675  | 7.11830237 |
| 3.23136348  | 1.47183923  | 4.84184592 |
| 8.23303709  | 1.47221859  | 4.85419668 |
| 1.40343240  | 9.89005150  | 4.83291520 |

|             |             |            |
|-------------|-------------|------------|
| 6.39271730  | 9.87888849  | 4.76939808 |
| 5.01826188  | 4.86255838  | 4.74741689 |
| 0.02975947  | 4.85076070  | 4.73613526 |
| 0.72972169  | 7.28317081  | 4.70528367 |
| 5.72419404  | 7.31840819  | 4.71448109 |
| 5.76136049  | 2.19530331  | 4.52124055 |
| 0.76780252  | 2.18274044  | 4.52441424 |
| 8.92724419  | 3.16928101  | 3.13275409 |
| 3.93734455  | 3.16928101  | 3.13275409 |
| 9.65447807  | 0.51179242  | 2.92767382 |
| 4.66457796  | 0.51179242  | 2.92767382 |
| 8.19081593  | 10.75315189 | 2.92137337 |
| 3.20091629  | 10.75315189 | 2.92137337 |
| 7.52427816  | 8.16568470  | 2.89047265 |
| 2.53437829  | 8.16568470  | 2.89047265 |
| 6.46140337  | 3.88992119  | 2.81003308 |
| 1.47150326  | 3.88992119  | 2.81003308 |
| 8.23615360  | 5.59719324  | 2.75910425 |
| 3.24625349  | 5.59719324  | 2.75910425 |
| 5.72548342  | 11.29866314 | 2.69921899 |
| 0.73558354  | 11.29866314 | 2.69921899 |
| 5.02271366  | 8.84247589  | 2.64073300 |
| 0.03281343  | 8.84247589  | 2.64073300 |
| 7.16234589  | 1.15467191  | 2.58495903 |
| 2.17244577  | 1.15467191  | 2.58495903 |
| 5.69094276  | 6.28061676  | 2.47308970 |
| 0.70104283  | 6.28061676  | 2.47308970 |
| 4.72644854  | 4.52631235  | 0.98044425 |
| -0.26345146 | 4.52631235  | 0.98044425 |
| 8.98416233  | 2.08401227  | 0.94984233 |
| 3.99426270  | 2.08401227  | 0.94984233 |
| 7.49692297  | 12.16127491 | 0.88189071 |
| 2.50702286  | 12.16127491 | 0.88189071 |
| 8.92881203  | 7.14167833  | 0.77916235 |
| 3.93891239  | 7.14167833  | 0.77916235 |
| 8.23179626  | 9.65808487  | 0.74752367 |
| 3.24189639  | 9.65808487  | 0.74752367 |
| 6.50168800  | 2.71004343  | 0.73384589 |
| 1.51178777  | 2.71004343  | 0.73384589 |
| 5.78449345  | 0.24636792  | 0.66762453 |
| 0.79459333  | 0.24636792  | 0.66762453 |
| 6.40908241  | 7.83185196  | 0.60482943 |
| 1.41918242  | 7.83185196  | 0.60482943 |
| 7.18588972  | 5.31081581  | 0.60368013 |

|            |             |            |
|------------|-------------|------------|
| 2.19598985 | 5.31081581  | 0.60368013 |
| 5.68450737 | 10.28863907 | 0.50651002 |
| 0.69460732 | 10.28863907 | 0.50651002 |

# TS for CH<sub>Cv</sub>+CH->CHCH<sub>Cv</sub>

1.000000000000

|             |             |             |
|-------------|-------------|-------------|
| 9.97980000  | 0.00000000  | 0.00000000  |
| -0.76395804 | 12.66177393 | 0.00000000  |
| 0.00000004  | 0.00000004  | 19.64040000 |

|   |    |   |    |
|---|----|---|----|
| H | C  | O | Fe |
| 3 | 41 | 4 | 80 |

Cart

|             |             |            |
|-------------|-------------|------------|
| 1.04986007  | 10.11635650 | 9.28070259 |
| 6.26058165  | 11.25999048 | 7.92998346 |
| 9.01218559  | 9.44693505  | 9.09626656 |
| 1.05114572  | 10.06389306 | 8.18603049 |
| 4.60332733  | 2.62150661  | 8.22550990 |
| 9.60501544  | 2.61343039  | 8.21983121 |
| 4.19045080  | 9.27644227  | 7.41668090 |
| 1.91780885  | 7.22713534  | 8.42358440 |
| 6.84767407  | 7.46226716  | 8.42121709 |
| 9.09838400  | 9.26942593  | 8.01335830 |
| 2.18325503  | 4.26445338  | 7.17775316 |
| 7.18703790  | 4.25594429  | 7.19027416 |
| 3.40796638  | 11.89618835 | 7.17569623 |
| 8.46171847  | 11.89012313 | 7.13904132 |
| -0.33323948 | 6.81723091  | 6.33385056 |
| 4.66862729  | 6.74366794  | 6.30743890 |
| 1.73586672  | 1.60096062  | 6.17386624 |
| 6.72302623  | 1.59129628  | 6.19583380 |
| 2.16667085  | 8.29619439  | 5.64971819 |
| 7.18818746  | 8.33713149  | 5.65379387 |
| 9.19375101  | 3.13464086  | 5.29269722 |
| 4.20458328  | 3.13913750  | 5.30001652 |
| 4.67163735  | 10.79860251 | 4.26633788 |
| -0.31087301 | 10.81827842 | 4.27763718 |
| 6.72608925  | 5.70363901  | 4.01484924 |
| 1.73295806  | 5.70580466  | 4.01996917 |
| 7.17448439  | 12.34979125 | 3.62890673 |
| 2.19103970  | 12.34844379 | 3.63627561 |
| 9.23582840  | 7.21281024  | 3.36312931 |
| 4.24092362  | 7.20411339  | 3.35159845 |
| 5.47292232  | 2.23055553  | 2.34193015 |

|             |             |            |
|-------------|-------------|------------|
| 0.48302215  | 2.23055553  | 2.34193015 |
| 6.73540354  | 9.72874641  | 2.00704742 |
| 1.74550355  | 9.72874641  | 2.00704742 |
| 7.98876715  | 3.77819967  | 1.47019899 |
| 2.99886727  | 3.77819967  | 1.47019899 |
| 9.21347809  | 11.29064846 | 1.28800344 |
| 4.22357798  | 11.29064846 | 1.28800344 |
| 5.52626467  | 6.13002825  | 0.45987183 |
| 0.53636485  | 6.13002825  | 0.45987183 |
| 7.45328903  | 1.12937152  | 0.40848067 |
| 2.46338916  | 1.12937152  | 0.40848067 |
| 4.75647831  | 8.73880577  | 0.18583304 |
| -0.23342146 | 8.73880577  | 0.18583304 |
| 6.62468069  | 7.22452634  | 9.56918148 |
| 4.72095656  | 2.46234906  | 9.40404068 |
| 9.72948185  | 2.44558499  | 9.39610604 |
| 1.65902834  | 7.06422284  | 9.57695622 |
| 2.54721032  | 10.21625434 | 7.10245535 |
| -0.03209306 | 10.80533232 | 6.84615749 |
| 3.20445338  | 7.75032301  | 7.15248990 |
| 8.20588038  | 7.81469204  | 7.15613522 |
| 0.68796556  | 12.41495657 | 4.89880450 |
| 7.52817682  | 0.04127529  | 7.05275795 |
| 3.86756620  | 5.15715520  | 7.01151543 |
| 8.86805755  | 5.17347374  | 6.98316825 |
| 3.19935871  | 2.71398330  | 6.91720213 |
| 8.19376186  | 2.71584890  | 6.91782838 |
| 0.66368580  | 8.40506161  | 7.05425125 |
| 5.70809476  | 8.30183330  | 6.97422071 |
| 4.98673461  | 10.89043835 | 6.90105036 |
| 7.52433933  | 10.20789021 | 7.06585321 |
| 1.37335920  | 5.92485172  | 6.84077783 |
| 6.39258706  | 5.90467137  | 6.80111827 |
| 0.68760777  | 3.26794525  | 6.73024791 |
| 5.68657398  | 3.26138705  | 6.74037142 |
| 0.00518863  | 0.86699515  | 6.68887492 |
| 4.99135828  | 0.85455386  | 6.71914312 |
| 3.24310954  | 11.75176774 | 5.17599077 |
| 8.22542138  | 11.76305295 | 5.15779383 |
| 8.88408990  | 9.19341971  | 4.98598397 |
| 3.89368692  | 9.21391986  | 5.07810221 |
| 7.50524168  | 4.23047787  | 5.04032750 |
| 2.51367390  | 4.23649420  | 5.04693735 |
| 8.18946862  | 6.75755923  | 4.93034329 |

|             |             |            |
|-------------|-------------|------------|
| 3.20278254  | 6.76296739  | 4.92506184 |
| 5.66863741  | 12.41887117 | 4.89792196 |
| 2.49096908  | 0.03241398  | 7.03773453 |
| 3.23226952  | 1.47124084  | 4.84308306 |
| 8.21465723  | 1.46960866  | 4.84639283 |
| 1.39901530  | 9.87489180  | 4.79860342 |
| 6.39297108  | 9.87698389  | 4.76613373 |
| 5.01718890  | 4.86298951  | 4.75071862 |
| 0.02656301  | 4.85650712  | 4.73386334 |
| 0.72825117  | 7.29544680  | 4.74779356 |
| 5.72574889  | 7.31453849  | 4.71129451 |
| 5.74746019  | 2.18353338  | 4.52351046 |
| 0.76024041  | 2.18592296  | 4.51269933 |
| 8.92724419  | 3.16928101  | 3.13275409 |
| 3.93734455  | 3.16928101  | 3.13275409 |
| 9.65447807  | 0.51179242  | 2.92767382 |
| 4.66457796  | 0.51179242  | 2.92767382 |
| 8.19081593  | 10.75315189 | 2.92137337 |
| 3.20091629  | 10.75315189 | 2.92137337 |
| 7.52427816  | 8.16568470  | 2.89047265 |
| 2.53437829  | 8.16568470  | 2.89047265 |
| 6.46140337  | 3.88992119  | 2.81003308 |
| 1.47150326  | 3.88992119  | 2.81003308 |
| 8.23615360  | 5.59719324  | 2.75910425 |
| 3.24625349  | 5.59719324  | 2.75910425 |
| 5.72548342  | 11.29866314 | 2.69921899 |
| 0.73558354  | 11.29866314 | 2.69921899 |
| 5.02271366  | 8.84247589  | 2.64073300 |
| 0.03281343  | 8.84247589  | 2.64073300 |
| 7.16234589  | 1.15467191  | 2.58495903 |
| 2.17244577  | 1.15467191  | 2.58495903 |
| 5.69094276  | 6.28061676  | 2.47308970 |
| 0.70104283  | 6.28061676  | 2.47308970 |
| 4.72644854  | 4.52631235  | 0.98044425 |
| -0.26345146 | 4.52631235  | 0.98044425 |
| 8.98416233  | 2.08401227  | 0.94984233 |
| 3.99426270  | 2.08401227  | 0.94984233 |
| 7.49692297  | 12.16127491 | 0.88189071 |
| 2.50702286  | 12.16127491 | 0.88189071 |
| 8.92881203  | 7.14167833  | 0.77916235 |
| 3.93891239  | 7.14167833  | 0.77916235 |
| 8.23179626  | 9.65808487  | 0.74752367 |
| 3.24189639  | 9.65808487  | 0.74752367 |
| 6.50168800  | 2.71004343  | 0.73384589 |

|            |             |            |
|------------|-------------|------------|
| 1.51178777 | 2.71004343  | 0.73384589 |
| 5.78449345 | 0.24636792  | 0.66762453 |
| 0.79459333 | 0.24636792  | 0.66762453 |
| 6.40908241 | 7.83185196  | 0.60482943 |
| 1.41918242 | 7.83185196  | 0.60482943 |
| 7.18588972 | 5.31081581  | 0.60368013 |
| 2.19598985 | 5.31081581  | 0.60368013 |
| 5.68450737 | 10.28863907 | 0.50651002 |
| 0.69460732 | 10.28863907 | 0.50651002 |

# CHCH<sub>Cv</sub>

1.000000000000

|             |             |             |    |
|-------------|-------------|-------------|----|
| 9.97980000  | 0.00000000  | 0.00000000  |    |
| -0.76395804 | 12.66177393 | 0.00000000  |    |
| 0.00000004  | 0.00000004  | 19.64040000 |    |
| H           | C           | O           | Fe |
| 3           | 41          | 4           | 80 |

Cart

|             |             |            |
|-------------|-------------|------------|
| 1.07028240  | 10.06374182 | 9.27502450 |
| 6.22576073  | 11.25425070 | 7.95052994 |
| 8.84246673  | 9.21147553  | 9.13062211 |
| 0.70282997  | 9.84041709  | 8.26473873 |
| 4.59820567  | 2.64236132  | 8.23774602 |
| 9.60845125  | 2.64727024  | 8.22386562 |
| 4.16599139  | 9.25286236  | 7.40463831 |
| 1.89623540  | 7.16336585  | 8.38298844 |
| 6.74918733  | 7.49653165  | 8.39139251 |
| 9.35144112  | 9.27735589  | 8.15275637 |
| 2.19397366  | 4.23577873  | 7.17409584 |
| 7.18261289  | 4.25242142  | 7.19590678 |
| 3.35919291  | 11.88668181 | 7.20636556 |
| 8.43767082  | 11.89819996 | 7.12488956 |
| -0.33447211 | 6.79487046  | 6.32946266 |
| 4.67868768  | 6.71560077  | 6.28742607 |
| 1.72970433  | 1.60931348  | 6.14892235 |
| 6.71328727  | 1.58295051  | 6.20425292 |
| 2.17781432  | 8.27041661  | 5.63628362 |
| 7.18542746  | 8.34862893  | 5.66149570 |
| 9.18557560  | 3.12734600  | 5.29142835 |
| 4.20654508  | 3.13551647  | 5.30593441 |
| 4.65865810  | 10.79288380 | 4.26465878 |
| -0.31153506 | 10.83300123 | 4.30704328 |
| 6.72276979  | 5.70777377  | 4.01310649 |

|             |             |            |
|-------------|-------------|------------|
| 1.73366257  | 5.69537283  | 4.01958953 |
| 7.16257802  | 12.35095102 | 3.62756623 |
| 2.19591330  | 12.34795845 | 3.64072098 |
| 9.23123235  | 7.21144345  | 3.36641432 |
| 4.23820190  | 7.20246515  | 3.33938324 |
| 5.47292232  | 2.23055553  | 2.34193015 |
| 0.48302215  | 2.23055553  | 2.34193015 |
| 6.73540354  | 9.72874641  | 2.00704742 |
| 1.74550355  | 9.72874641  | 2.00704742 |
| 7.98876715  | 3.77819967  | 1.47019899 |
| 2.99886727  | 3.77819967  | 1.47019899 |
| 9.21347809  | 11.29064846 | 1.28800344 |
| 4.22357798  | 11.29064846 | 1.28800344 |
| 5.52626467  | 6.13002825  | 0.45987183 |
| 0.53636485  | 6.13002825  | 0.45987183 |
| 7.45328903  | 1.12937152  | 0.40848067 |
| 2.46338916  | 1.12937152  | 0.40848067 |
| 4.75647831  | 8.73880577  | 0.18583304 |
| -0.23342146 | 8.73880577  | 0.18583304 |
| 6.68738825  | 7.24102455  | 9.55897102 |
| 4.71991934  | 2.50930552  | 9.41845821 |
| 9.72020389  | 2.49831231  | 9.40432608 |
| 1.67792579  | 6.89418320  | 9.52862864 |
| 2.44511351  | 10.18912976 | 7.17327262 |
| -0.05040022 | 10.83512695 | 6.75701875 |
| 3.22183290  | 7.70736067  | 7.14595119 |
| 8.23951122  | 7.86078872  | 7.16384563 |
| 0.68481313  | 12.43454793 | 4.87838876 |
| 7.50218704  | 0.03416157  | 7.06328170 |
| 3.87317656  | 5.13435850  | 7.00303481 |
| 8.87053833  | 5.15439294  | 6.97501463 |
| 3.20270469  | 2.69727655  | 6.91848832 |
| 8.18450753  | 2.71103234  | 6.91936606 |
| 0.76002608  | 8.25669191  | 7.02780349 |
| 5.70576768  | 8.30090887  | 6.98296428 |
| 4.92971261  | 10.88201744 | 6.93833220 |
| 7.47344146  | 10.22599143 | 7.05621376 |
| 1.37117439  | 5.86521666  | 6.77968722 |
| 6.40553475  | 5.90857585  | 6.80484629 |
| 0.68245713  | 3.26303459  | 6.72815251 |
| 5.68706422  | 3.25290123  | 6.74518241 |
| -0.00414366 | 0.86816743  | 6.67694154 |
| 4.97584403  | 0.83765558  | 6.72862787 |
| 3.22231822  | 11.72965814 | 5.19903646 |



|             |             |            |
|-------------|-------------|------------|
| 8.21117580  | 11.77857465 | 5.15093766 |
| 8.87408151  | 9.19448704  | 4.96399543 |
| 3.88099007  | 9.22448702  | 5.11167130 |
| 7.50084740  | 4.23026797  | 5.03565622 |
| 2.51689310  | 4.21576267  | 5.03242558 |
| 8.17920345  | 6.76125202  | 4.95315157 |
| 3.21137992  | 6.75828813  | 4.91173990 |
| 5.65054690  | 12.40677492 | 4.90863630 |
| 2.46822600  | 0.04485925  | 7.02007474 |
| 3.24040487  | 1.46640223  | 4.83684400 |
| 8.20203615  | 1.46672133  | 4.84608816 |
| 1.39436836  | 9.85487592  | 4.78758738 |
| 6.38673449  | 9.88634957  | 4.78646130 |
| 5.02107740  | 4.86310130  | 4.76203963 |
| 0.01994761  | 4.84853607  | 4.72961357 |
| 0.72695718  | 7.28309767  | 4.72665567 |
| 5.72820472  | 7.32315078  | 4.70895236 |
| 5.74493743  | 2.17878297  | 4.52608656 |
| 0.75465368  | 2.19134679  | 4.50523722 |
| 8.92724419  | 3.16928101  | 3.13275409 |
| 3.93734455  | 3.16928101  | 3.13275409 |
| 9.65447807  | 0.51179242  | 2.92767382 |
| 4.66457796  | 0.51179242  | 2.92767382 |
| 8.19081593  | 10.75315189 | 2.92137337 |
| 3.20091629  | 10.75315189 | 2.92137337 |
| 7.52427816  | 8.16568470  | 2.89047265 |
| 2.53437829  | 8.16568470  | 2.89047265 |
| 6.46140337  | 3.88992119  | 2.81003308 |
| 1.47150326  | 3.88992119  | 2.81003308 |
| 8.23615360  | 5.59719324  | 2.75910425 |
| 3.24625349  | 5.59719324  | 2.75910425 |
| 5.72548342  | 11.29866314 | 2.69921899 |
| 0.73558354  | 11.29866314 | 2.69921899 |
| 5.02271366  | 8.84247589  | 2.64073300 |
| 0.03281343  | 8.84247589  | 2.64073300 |
| 7.16234589  | 1.15467191  | 2.58495903 |
| 2.17244577  | 1.15467191  | 2.58495903 |
| 5.69094276  | 6.28061676  | 2.47308970 |
| 0.70104283  | 6.28061676  | 2.47308970 |
| 4.72644854  | 4.52631235  | 0.98044425 |
| -0.26345146 | 4.52631235  | 0.98044425 |
| 8.98416233  | 2.08401227  | 0.94984233 |
| 3.99426270  | 2.08401227  | 0.94984233 |
| 7.49692297  | 12.16127491 | 0.88189071 |

|            |             |            |
|------------|-------------|------------|
| 2.50702286 | 12.16127491 | 0.88189071 |
| 8.92881203 | 7.14167833  | 0.77916235 |
| 3.93891239 | 7.14167833  | 0.77916235 |
| 8.23179626 | 9.65808487  | 0.74752367 |
| 3.24189639 | 9.65808487  | 0.74752367 |
| 6.50168800 | 2.71004343  | 0.73384589 |
| 1.51178777 | 2.71004343  | 0.73384589 |
| 5.78449345 | 0.24636792  | 0.66762453 |
| 0.79459333 | 0.24636792  | 0.66762453 |
| 6.40908241 | 7.83185196  | 0.60482943 |
| 1.41918242 | 7.83185196  | 0.60482943 |
| 7.18588972 | 5.31081581  | 0.60368013 |
| 2.19598985 | 5.31081581  | 0.60368013 |
| 5.68450737 | 10.28863907 | 0.50651002 |
| 0.69460732 | 10.28863907 | 0.50651002 |

# CH<sub>Cv</sub>+CH<sub>2</sub>

1.000000000000

|             |             |             |    |
|-------------|-------------|-------------|----|
| 9.97980000  | 0.00000000  | 0.00000000  |    |
| -0.76395804 | 12.66177393 | 0.00000000  |    |
| 0.00000004  | 0.00000004  | 19.64040000 |    |
| H           | C           | O           | Fe |
| 4           | 41          | 4           | 80 |

Cart

|             |             |            |
|-------------|-------------|------------|
| 1.31867304  | 12.26127629 | 8.85989171 |
| 1.11446805  | 10.58484155 | 9.35459734 |
| 6.26142493  | 11.25250949 | 7.91806457 |
| 9.19920162  | 9.34240848  | 9.08001248 |
| 1.18014407  | 11.20118180 | 8.43954560 |
| 4.60495194  | 2.64169457  | 8.22660407 |
| 9.61086008  | 2.59186834  | 8.21378175 |
| 4.15155117  | 9.28703914  | 7.35783042 |
| 2.17297968  | 7.36164805  | 8.59253883 |
| 6.90364965  | 7.41712515  | 8.42887172 |
| 9.15593594  | 9.25191408  | 7.97747602 |
| 2.18742329  | 4.24462595  | 7.19160580 |
| 7.18621555  | 4.26037587  | 7.19107035 |
| 3.46866328  | 11.93217013 | 7.16561647 |
| 8.44941093  | 11.88900438 | 7.15817493 |
| -0.34461250 | 6.77072564  | 6.30381432 |
| 4.67441143  | 6.74741677  | 6.29306993 |
| 1.75400619  | 1.58088088  | 6.17086267 |
| 6.73123720  | 1.59824667  | 6.19921824 |

|             |             |            |
|-------------|-------------|------------|
| 2.14851774  | 8.26820383  | 5.58540004 |
| 7.18909014  | 8.33067526  | 5.65666871 |
| 9.19355205  | 3.12785939  | 5.29225553 |
| 4.20446711  | 3.12899124  | 5.29272748 |
| 4.66369871  | 10.77711064 | 4.26549714 |
| -0.30369829 | 10.79508604 | 4.26400883 |
| 6.72112834  | 5.70016351  | 4.01512583 |
| 1.73183299  | 5.68585473  | 4.00915089 |
| 7.18218061  | 12.34621864 | 3.64028827 |
| 2.19446847  | 12.34331889 | 3.63928210 |
| 9.22833613  | 7.21339207  | 3.34747336 |
| 4.24200914  | 7.20238595  | 3.34017545 |
| 5.47292232  | 2.23055553  | 2.34193015 |
| 0.48302215  | 2.23055553  | 2.34193015 |
| 6.73540354  | 9.72874641  | 2.00704742 |
| 1.74550355  | 9.72874641  | 2.00704742 |
| 7.98876715  | 3.77819967  | 1.47019899 |
| 2.99886727  | 3.77819967  | 1.47019899 |
| 9.21347809  | 11.29064846 | 1.28800344 |
| 4.22357798  | 11.29064846 | 1.28800344 |
| 5.52626467  | 6.13002825  | 0.45987183 |
| 0.53636485  | 6.13002825  | 0.45987183 |
| 7.45328903  | 1.12937152  | 0.40848067 |
| 2.46338916  | 1.12937152  | 0.40848067 |
| 4.75647831  | 8.73880577  | 0.18583304 |
| -0.23342146 | 8.73880577  | 0.18583304 |
| 6.58680100  | 7.21340090  | 9.55965635 |
| 4.71783214  | 2.49326521  | 9.40631677 |
| 9.72425322  | 2.40689685  | 9.38833358 |
| 1.70792539  | 7.20809319  | 9.66652875 |
| 2.49950092  | 10.29099131 | 7.24946121 |
| 0.00451439  | 10.84055246 | 6.96549823 |
| 3.15606882  | 7.75792221  | 7.14725174 |
| 8.20523626  | 7.79193427  | 7.14969374 |
| 0.68964167  | 12.39299157 | 4.91191627 |
| 7.53130653  | 0.03672169  | 7.04174303 |
| 3.85229957  | 5.18436921  | 7.02556006 |
| 8.87387359  | 5.15796294  | 7.01191281 |
| 3.20741485  | 2.71699400  | 6.91354825 |
| 8.19622361  | 2.71475868  | 6.91664537 |
| 0.61192735  | 8.38122439  | 6.94075950 |
| 5.70588946  | 8.31706196  | 6.97061315 |
| 4.99164455  | 10.88413888 | 6.90399843 |
| 7.56857343  | 10.19032258 | 7.11323699 |

|            |             |            |
|------------|-------------|------------|
| 1.37291258 | 5.88730835  | 6.80595145 |
| 6.39760368 | 5.91348738  | 6.80692058 |
| 0.69290444 | 3.25408900  | 6.73298486 |
| 5.68736453 | 3.27222242  | 6.73940812 |
| 0.01102869 | 0.85687424  | 6.67740593 |
| 5.00343702 | 0.88004318  | 6.70492493 |
| 3.24036372 | 11.73879611 | 5.19053556 |
| 8.23775766 | 11.73179485 | 5.17743392 |
| 8.86914898 | 9.18539911  | 4.98364327 |
| 3.88180833 | 9.21869506  | 5.14207893 |
| 7.50811274 | 4.23161483  | 5.04206234 |
| 2.51897509 | 4.23238867  | 5.04561273 |
| 8.18757902 | 6.74949858  | 4.92215195 |
| 3.21256055 | 6.75481892  | 4.91737290 |
| 5.67347309 | 12.39958451 | 4.89883066 |
| 2.51056699 | 0.03250691  | 7.07873815 |
| 3.23968120 | 1.44852284  | 4.84896558 |
| 8.21956480 | 1.45614124  | 4.84980362 |
| 1.39950228 | 9.89276393  | 4.84696347 |
| 6.38528103 | 9.87075373  | 4.77280757 |
| 5.01463279 | 4.86333374  | 4.76382928 |
| 0.02370413 | 4.85187789  | 4.74471668 |
| 0.72595733 | 7.27610074  | 4.71244705 |
| 5.72742944 | 7.31379245  | 4.71077029 |
| 5.75327118 | 2.17864463  | 4.52393788 |
| 0.76297859 | 2.17849278  | 4.51320709 |
| 8.92724419 | 3.16928101  | 3.13275409 |
| 3.93734455 | 3.16928101  | 3.13275409 |
| 9.65447807 | 0.51179242  | 2.92767382 |
| 4.66457796 | 0.51179242  | 2.92767382 |
| 8.19081593 | 10.75315189 | 2.92137337 |
| 3.20091629 | 10.75315189 | 2.92137337 |
| 7.52427816 | 8.16568470  | 2.89047265 |
| 2.53437829 | 8.16568470  | 2.89047265 |
| 6.46140337 | 3.88992119  | 2.81003308 |
| 1.47150326 | 3.88992119  | 2.81003308 |
| 8.23615360 | 5.59719324  | 2.75910425 |
| 3.24625349 | 5.59719324  | 2.75910425 |
| 5.72548342 | 11.29866314 | 2.69921899 |
| 0.73558354 | 11.29866314 | 2.69921899 |
| 5.02271366 | 8.84247589  | 2.64073300 |
| 0.03281343 | 8.84247589  | 2.64073300 |
| 7.16234589 | 1.15467191  | 2.58495903 |
| 2.17244577 | 1.15467191  | 2.58495903 |

|             |             |            |
|-------------|-------------|------------|
| 5.69094276  | 6.28061676  | 2.47308970 |
| 0.70104283  | 6.28061676  | 2.47308970 |
| 4.72644854  | 4.52631235  | 0.98044425 |
| -0.26345146 | 4.52631235  | 0.98044425 |
| 8.98416233  | 2.08401227  | 0.94984233 |
| 3.99426270  | 2.08401227  | 0.94984233 |
| 7.49692297  | 12.16127491 | 0.88189071 |
| 2.50702286  | 12.16127491 | 0.88189071 |
| 8.92881203  | 7.14167833  | 0.77916235 |
| 3.93891239  | 7.14167833  | 0.77916235 |
| 8.23179626  | 9.65808487  | 0.74752367 |
| 3.24189639  | 9.65808487  | 0.74752367 |
| 6.50168800  | 2.71004343  | 0.73384589 |
| 1.51178777  | 2.71004343  | 0.73384589 |
| 5.78449345  | 0.24636792  | 0.66762453 |
| 0.79459333  | 0.24636792  | 0.66762453 |
| 6.40908241  | 7.83185196  | 0.60482943 |
| 1.41918242  | 7.83185196  | 0.60482943 |
| 7.18588972  | 5.31081581  | 0.60368013 |
| 2.19598985  | 5.31081581  | 0.60368013 |
| 5.68450737  | 10.28863907 | 0.50651002 |
| 0.69460732  | 10.28863907 | 0.50651002 |

# TS for  $\text{CH}_{\text{cv}} + \text{CH}_2 \rightarrow \text{CHCH}_2_{\text{cv}}$

1.000000000000

|             |             |             |    |
|-------------|-------------|-------------|----|
| 9.97980000  | 0.00000000  | 0.00000000  |    |
| -0.76395804 | 12.66177393 | 0.00000000  |    |
| 0.00000004  | 0.00000004  | 19.64040000 |    |
| H           | C           | O           | Fe |
| 4           | 41          | 4           | 80 |

Cart

|            |             |            |
|------------|-------------|------------|
| 0.51870205 | 10.89040773 | 8.84761586 |
| 1.26891356 | 9.37600895  | 9.31962168 |
| 6.24070373 | 11.25786093 | 7.94769821 |
| 8.84680653 | 9.43914580  | 9.14606396 |
| 0.88127029 | 9.90765156  | 8.44313183 |
| 4.59557969 | 2.63189800  | 8.23140889 |
| 9.60424094 | 2.62340951  | 8.21522822 |
| 4.16054519 | 9.27040118  | 7.38369855 |
| 2.35071972 | 7.06670465  | 8.58518766 |
| 6.91184502 | 7.42455983  | 8.42139607 |
| 9.16836356 | 9.27975841  | 8.10370378 |
| 2.18926821 | 4.25193241  | 7.17617555 |
| 7.18573773 | 4.26629781  | 7.18722863 |

|             |             |            |
|-------------|-------------|------------|
| 3.38608262  | 11.89527302 | 7.21565796 |
| 8.42028544  | 11.91777766 | 7.14002780 |
| -0.32382456 | 6.80850542  | 6.33313790 |
| 4.69477713  | 6.72887400  | 6.28376885 |
| 1.72920804  | 1.62965680  | 6.14565993 |
| 6.71953330  | 1.59980028  | 6.19733442 |
| 2.15230617  | 8.28184453  | 5.64513914 |
| 7.19920277  | 8.35204518  | 5.66708118 |
| 9.18931408  | 3.13592990  | 5.28643327 |
| 4.20764060  | 3.14278146  | 5.29800287 |
| 4.65810217  | 10.77669635 | 4.26588452 |
| -0.30597797 | 10.82769129 | 4.27814792 |
| 6.72787535  | 5.71305819  | 4.01557890 |
| 1.73537854  | 5.70317558  | 4.01715264 |
| 7.17275794  | 12.34800344 | 3.64096254 |
| 2.19555173  | 12.34568891 | 3.64120518 |
| 9.23347111  | 7.21298413  | 3.35969828 |
| 4.24130456  | 7.20373622  | 3.34060282 |
| 5.47292232  | 2.23055553  | 2.34193015 |
| 0.48302215  | 2.23055553  | 2.34193015 |
| 6.73540354  | 9.72874641  | 2.00704742 |
| 1.74550355  | 9.72874641  | 2.00704742 |
| 7.98876715  | 3.77819967  | 1.47019899 |
| 2.99886727  | 3.77819967  | 1.47019899 |
| 9.21347809  | 11.29064846 | 1.28800344 |
| 4.22357798  | 11.29064846 | 1.28800344 |
| 5.52626467  | 6.13002825  | 0.45987183 |
| 0.53636485  | 6.13002825  | 0.45987183 |
| 7.45328903  | 1.12937152  | 0.40848067 |
| 2.46338916  | 1.12937152  | 0.40848067 |
| 4.75647831  | 8.73880577  | 0.18583304 |
| -0.23342146 | 8.73880577  | 0.18583304 |
| 6.63312407  | 7.21879525  | 9.56441346 |
| 4.72255500  | 2.47995524  | 9.40963114 |
| 9.71925625  | 2.45402919  | 9.39313841 |
| 1.90568522  | 6.85503649  | 9.65867139 |
| 2.48650738  | 10.22094889 | 7.18907037 |
| -0.01546164 | 10.89258857 | 6.83144857 |
| 3.22338838  | 7.71375129  | 7.15729784 |
| 8.24301446  | 7.83146743  | 7.16331578 |
| 0.68494945  | 12.42563891 | 4.88630953 |
| 7.49725933  | 0.04277855  | 7.05761782 |
| 3.86721222  | 5.17387555  | 7.03576814 |
| 8.88060309  | 5.17461176  | 6.99510703 |

|            |             |            |
|------------|-------------|------------|
| 3.20904266 | 2.72184843  | 6.91495205 |
| 8.18937044 | 2.72326265  | 6.91481667 |
| 0.63788106 | 8.43405368  | 6.96185144 |
| 5.72462671 | 8.31688257  | 6.97988584 |
| 4.95701618 | 10.89273146 | 6.93620708 |
| 7.53902499 | 10.21115700 | 7.09484562 |
| 1.39242282 | 5.90758244  | 6.79720204 |
| 6.42456351 | 5.92914500  | 6.80365789 |
| 0.68446503 | 3.27352216  | 6.72769296 |
| 5.68745495 | 3.26416876  | 6.74119377 |
| 0.00543830 | 0.87557791  | 6.68428529 |
| 4.98805885 | 0.85027432  | 6.72175318 |
| 3.23124665 | 11.73087936 | 5.19661354 |
| 8.22685078 | 11.76379581 | 5.16659423 |
| 8.87527297 | 9.20546987  | 4.97782759 |
| 3.88028239 | 9.21979331  | 5.16321757 |
| 7.50764478 | 4.24200339  | 5.04195071 |
| 2.51760018 | 4.23771202  | 5.04551785 |
| 8.19072184 | 6.76661441  | 4.93715976 |
| 3.20735687 | 6.76554551  | 4.91492691 |
| 5.65477805 | 12.41130472 | 4.90362937 |
| 2.51299774 | 0.09163328  | 7.01068814 |
| 3.23878325 | 1.47166636  | 4.83642205 |
| 8.20769939 | 1.46732215  | 4.84638100 |
| 1.39692486 | 9.87947628  | 4.79498340 |
| 6.38566974 | 9.88651823  | 4.78642967 |
| 5.01808636 | 4.87314885  | 4.76298605 |
| 0.02511286 | 4.85864841  | 4.73138133 |
| 0.72598313 | 7.29219076  | 4.73498663 |
| 5.73037737 | 7.32698669  | 4.70989040 |
| 5.74678288 | 2.18429798  | 4.52279135 |
| 0.75400034 | 2.19297806  | 4.50533627 |
| 8.92724419 | 3.16928101  | 3.13275409 |
| 3.93734455 | 3.16928101  | 3.13275409 |
| 9.65447807 | 0.51179242  | 2.92767382 |
| 4.66457796 | 0.51179242  | 2.92767382 |
| 8.19081593 | 10.75315189 | 2.92137337 |
| 3.20091629 | 10.75315189 | 2.92137337 |
| 7.52427816 | 8.16568470  | 2.89047265 |
| 2.53437829 | 8.16568470  | 2.89047265 |
| 6.46140337 | 3.88992119  | 2.81003308 |
| 1.47150326 | 3.88992119  | 2.81003308 |
| 8.23615360 | 5.59719324  | 2.75910425 |
| 3.24625349 | 5.59719324  | 2.75910425 |

|             |             |            |
|-------------|-------------|------------|
| 5.72548342  | 11.29866314 | 2.69921899 |
| 0.73558354  | 11.29866314 | 2.69921899 |
| 5.02271366  | 8.84247589  | 2.64073300 |
| 0.03281343  | 8.84247589  | 2.64073300 |
| 7.16234589  | 1.15467191  | 2.58495903 |
| 2.17244577  | 1.15467191  | 2.58495903 |
| 5.69094276  | 6.28061676  | 2.47308970 |
| 0.70104283  | 6.28061676  | 2.47308970 |
| 4.72644854  | 4.52631235  | 0.98044425 |
| -0.26345146 | 4.52631235  | 0.98044425 |
| 8.98416233  | 2.08401227  | 0.94984233 |
| 3.99426270  | 2.08401227  | 0.94984233 |
| 7.49692297  | 12.16127491 | 0.88189071 |
| 2.50702286  | 12.16127491 | 0.88189071 |
| 8.92881203  | 7.14167833  | 0.77916235 |
| 3.93891239  | 7.14167833  | 0.77916235 |
| 8.23179626  | 9.65808487  | 0.74752367 |
| 3.24189639  | 9.65808487  | 0.74752367 |
| 6.50168800  | 2.71004343  | 0.73384589 |
| 1.51178777  | 2.71004343  | 0.73384589 |
| 5.78449345  | 0.24636792  | 0.66762453 |
| 0.79459333  | 0.24636792  | 0.66762453 |
| 6.40908241  | 7.83185196  | 0.60482943 |
| 1.41918242  | 7.83185196  | 0.60482943 |
| 7.18588972  | 5.31081581  | 0.60368013 |
| 2.19598985  | 5.31081581  | 0.60368013 |
| 5.68450737  | 10.28863907 | 0.50651002 |
| 0.69460732  | 10.28863907 | 0.50651002 |

# CH<sub>v</sub>+CH<sub>3</sub> (state1)

1.000000000000

|             |             |             |    |
|-------------|-------------|-------------|----|
| 9.97980000  | 0.00000000  | 0.00000000  |    |
| -0.76395804 | 12.66177393 | 0.00000000  |    |
| 0.00000004  | 0.00000004  | 19.64040000 |    |
| H           | C           | O           | Fe |
| 5           | 41          | 4           | 80 |

Cart

|            |             |            |
|------------|-------------|------------|
| 0.24268527 | 11.33397898 | 9.23055419 |
| 1.93063505 | 10.78718734 | 9.30102144 |
| 6.26480603 | 11.24755886 | 7.91831001 |
| 9.24442522 | 9.35804107  | 9.08765178 |
| 1.55912309 | 12.50046976 | 9.08568373 |
| 1.23470765 | 11.47293042 | 8.77461281 |
| 4.61859669 | 2.62792690  | 8.21549171 |



|             |             |            |
|-------------|-------------|------------|
| 9.61725515  | 2.68835882  | 8.23116739 |
| 4.14764367  | 9.31945247  | 7.37909104 |
| 1.71755546  | 7.66931515  | 8.43155826 |
| 7.06072819  | 7.36444238  | 8.49998256 |
| 9.20224640  | 9.22545961  | 7.99298670 |
| 2.19808629  | 4.26588945  | 7.19091881 |
| 7.18788105  | 4.27184371  | 7.17741198 |
| 3.44734204  | 11.96654916 | 7.15084493 |
| 8.43600899  | 11.90579010 | 7.15618801 |
| -0.33402648 | 6.80441812  | 6.28418696 |
| 4.65260992  | 6.77865068  | 6.33176352 |
| 1.74243019  | 1.59991354  | 6.17035623 |
| 6.74406393  | 1.61290070  | 6.18768709 |
| 2.15743448  | 8.28243186  | 5.58760823 |
| 7.18740987  | 8.34455034  | 5.66800544 |
| 9.19822927  | 3.13309612  | 5.29392577 |
| 4.20908373  | 3.13620603  | 5.29291396 |
| 4.66379539  | 10.80882316 | 4.26959422 |
| -0.30745820 | 10.79793109 | 4.25287830 |
| 6.72319698  | 5.71198790  | 4.01790960 |
| 1.73280352  | 5.69670152  | 4.01379385 |
| 7.18701044  | 12.34561515 | 3.64486916 |
| 2.18777219  | 12.34899385 | 3.64067035 |
| 9.22885870  | 7.21287386  | 3.34337583 |
| 4.24119052  | 7.19986319  | 3.34321440 |
| 5.47292232  | 2.23055553  | 2.34193015 |
| 0.48302215  | 2.23055553  | 2.34193015 |
| 6.73540354  | 9.72874641  | 2.00704742 |
| 1.74550355  | 9.72874641  | 2.00704742 |
| 7.98876715  | 3.77819967  | 1.47019899 |
| 2.99886727  | 3.77819967  | 1.47019899 |
| 9.21347809  | 11.29064846 | 1.28800344 |
| 4.22357798  | 11.29064846 | 1.28800344 |
| 5.52626467  | 6.13002825  | 0.45987183 |
| 0.53636485  | 6.13002825  | 0.45987183 |
| 7.45328903  | 1.12937152  | 0.40848067 |
| 2.46338916  | 1.12937152  | 0.40848067 |
| 4.75647831  | 8.73880577  | 0.18583304 |
| -0.23342146 | 8.73880577  | 0.18583304 |
| 6.63239970  | 7.16645728  | 9.58915714 |
| 4.74420875  | 2.45205951  | 9.39244837 |
| 9.72915952  | 2.55086431  | 9.41228015 |
| 1.61733842  | 7.42306016  | 9.59550675 |
| 2.48932334  | 10.30746743 | 7.24894338 |

|            |             |            |
|------------|-------------|------------|
| 0.03019084 | 10.86321265 | 7.00243611 |
| 3.14973304 | 7.80650983  | 7.13063844 |
| 8.21432973 | 7.79280167  | 7.16590346 |
| 0.68415172 | 12.39907466 | 4.91579105 |
| 7.52087393 | 0.05048923  | 7.04665118 |
| 3.87133732 | 5.17064223  | 6.98808614 |
| 8.86635361 | 5.18850089  | 6.99234582 |
| 3.20922651 | 2.72546182  | 6.91363581 |
| 8.20689179 | 2.73432091  | 6.91814106 |
| 0.65435418 | 8.35375690  | 6.96365385 |
| 5.68289784 | 8.34704807  | 6.95286691 |
| 4.97860611 | 10.91655818 | 6.90664295 |
| 7.58216111 | 10.19611746 | 7.12199438 |
| 1.37920751 | 5.90094591  | 6.77467947 |
| 6.38723590 | 5.92178599  | 6.79461481 |
| 0.70171353 | 3.27451756  | 6.73001463 |
| 5.68956280 | 3.28674226  | 6.73343854 |
| 0.00406199 | 0.86983816  | 6.68094397 |
| 5.00836139 | 0.90352404  | 6.68243584 |
| 3.22902428 | 11.75578286 | 5.18989634 |
| 8.24547713 | 11.73450720 | 5.18415588 |
| 8.86826928 | 9.20287756  | 5.00681695 |
| 3.88946711 | 9.24181926  | 5.11763673 |
| 7.50830654 | 4.23569387  | 5.03536059 |
| 2.51965548 | 4.23160032  | 5.03375785 |
| 8.18605844 | 6.76537341  | 4.92341557 |
| 3.21267036 | 6.76302886  | 4.92506675 |
| 5.67545972 | 12.41369487 | 4.89639682 |
| 2.50189262 | 0.07005616  | 7.09050121 |
| 3.23158477 | 1.46344444  | 4.84601129 |
| 8.22728776 | 1.46063742  | 4.84974184 |
| 1.39363636 | 9.90161110  | 4.86448810 |
| 6.38448278 | 9.88818426  | 4.78184144 |
| 5.01666492 | 4.86399377  | 4.73455113 |
| 0.02125704 | 4.85508461  | 4.73489326 |
| 0.72834791 | 7.28796833  | 4.70226180 |
| 5.71946546 | 7.32485023  | 4.71324562 |
| 5.75504432 | 2.18638757  | 4.51774529 |
| 0.76231133 | 2.18349402  | 4.51205880 |
| 8.92724419 | 3.16928101  | 3.13275409 |
| 3.93734455 | 3.16928101  | 3.13275409 |
| 9.65447807 | 0.51179242  | 2.92767382 |
| 4.66457796 | 0.51179242  | 2.92767382 |
| 8.19081593 | 10.75315189 | 2.92137337 |

|             |             |            |
|-------------|-------------|------------|
| 3.20091629  | 10.75315189 | 2.92137337 |
| 7.52427816  | 8.16568470  | 2.89047265 |
| 2.53437829  | 8.16568470  | 2.89047265 |
| 6.46140337  | 3.88992119  | 2.81003308 |
| 1.47150326  | 3.88992119  | 2.81003308 |
| 8.23615360  | 5.59719324  | 2.75910425 |
| 3.24625349  | 5.59719324  | 2.75910425 |
| 5.72548342  | 11.29866314 | 2.69921899 |
| 0.73558354  | 11.29866314 | 2.69921899 |
| 5.02271366  | 8.84247589  | 2.64073300 |
| 0.03281343  | 8.84247589  | 2.64073300 |
| 7.16234589  | 1.15467191  | 2.58495903 |
| 2.17244577  | 1.15467191  | 2.58495903 |
| 5.69094276  | 6.28061676  | 2.47308970 |
| 0.70104283  | 6.28061676  | 2.47308970 |
| 4.72644854  | 4.52631235  | 0.98044425 |
| -0.26345146 | 4.52631235  | 0.98044425 |
| 8.98416233  | 2.08401227  | 0.94984233 |
| 3.99426270  | 2.08401227  | 0.94984233 |
| 7.49692297  | 12.16127491 | 0.88189071 |
| 2.50702286  | 12.16127491 | 0.88189071 |
| 8.92881203  | 7.14167833  | 0.77916235 |
| 3.93891239  | 7.14167833  | 0.77916235 |
| 8.23179626  | 9.65808487  | 0.74752367 |
| 3.24189639  | 9.65808487  | 0.74752367 |
| 6.50168800  | 2.71004343  | 0.73384589 |
| 1.51178777  | 2.71004343  | 0.73384589 |
| 5.78449345  | 0.24636792  | 0.66762453 |
| 0.79459333  | 0.24636792  | 0.66762453 |
| 6.40908241  | 7.83185196  | 0.60482943 |
| 1.41918242  | 7.83185196  | 0.60482943 |
| 7.18588972  | 5.31081581  | 0.60368013 |
| 2.19598985  | 5.31081581  | 0.60368013 |
| 5.68450737  | 10.28863907 | 0.50651002 |
| 0.69460732  | 10.28863907 | 0.50651002 |

# CH<sub>Cv</sub>+CH<sub>3</sub> (state2)

1.000000000000

|             |             |             |    |
|-------------|-------------|-------------|----|
| 9.97980000  | 0.00000000  | 0.00000000  |    |
| -0.76395804 | 12.66177393 | 0.00000000  |    |
| 0.00000004  | 0.00000004  | 19.64040000 |    |
| H           | C           | O           | Fe |
| 5           | 41          | 4           | 80 |

Cart

|             |             |            |
|-------------|-------------|------------|
| 6.36646065  | 6.22571354  | 8.91231815 |
| 7.67221873  | 7.41731280  | 9.10465125 |
| 6.26619536  | 11.23175088 | 7.92431495 |
| 9.23462510  | 9.35395003  | 9.04659803 |
| 5.97279768  | 7.94865758  | 9.07933487 |
| 6.68677863  | 7.24566201  | 8.59982562 |
| 4.61427272  | 2.60356657  | 8.21209204 |
| 9.59159976  | 2.62341901  | 8.22341507 |
| 4.16051070  | 9.30088342  | 7.33695707 |
| 1.74560194  | 7.55507363  | 8.40869761 |
| 0.97093565  | 11.30951284 | 8.38981269 |
| 9.18447928  | 9.26385376  | 7.94633149 |
| 2.19641286  | 4.25200006  | 7.18948199 |
| 7.19165266  | 4.26444297  | 7.17110745 |
| 3.46139523  | 11.95204733 | 7.16599423 |
| 8.43689152  | 11.88061878 | 7.13744126 |
| -0.33175041 | 6.80876201  | 6.30268082 |
| 4.65990421  | 6.74610430  | 6.31923763 |
| 1.73086195  | 1.58680064  | 6.18450001 |
| 6.73920044  | 1.60615736  | 6.18281501 |
| 2.17216946  | 8.27567623  | 5.58358885 |
| 7.19723859  | 8.35034917  | 5.69124200 |
| 9.19433389  | 3.13726770  | 5.29093230 |
| 4.20669078  | 3.13764667  | 5.29040230 |
| 4.67059990  | 10.79707121 | 4.26485572 |
| -0.30555616 | 10.78768714 | 4.26825078 |
| 6.72594139  | 5.71241377  | 4.01707320 |
| 1.73726464  | 5.69503822  | 4.01134832 |
| 7.18382540  | 12.34660769 | 3.63790784 |
| 2.19074892  | 12.34573433 | 3.64106311 |
| 9.23027937  | 7.21125014  | 3.34966646 |
| 4.24297364  | 7.19899860  | 3.34271304 |
| 5.47292232  | 2.23055553  | 2.34193015 |
| 0.48302215  | 2.23055553  | 2.34193015 |
| 6.73540354  | 9.72874641  | 2.00704742 |
| 1.74550355  | 9.72874641  | 2.00704742 |
| 7.98876715  | 3.77819967  | 1.47019899 |
| 2.99886727  | 3.77819967  | 1.47019899 |
| 9.21347809  | 11.29064846 | 1.28800344 |
| 4.22357798  | 11.29064846 | 1.28800344 |
| 5.52626467  | 6.13002825  | 0.45987183 |
| 0.53636485  | 6.13002825  | 0.45987183 |
| 7.45328903  | 1.12937152  | 0.40848067 |

|             |             |            |
|-------------|-------------|------------|
| 2.46338916  | 1.12937152  | 0.40848067 |
| 4.75647831  | 8.73880577  | 0.18583304 |
| -0.23342146 | 8.73880577  | 0.18583304 |
| 1.12621218  | 11.37938499 | 9.57374775 |
| 4.75011747  | 2.42810930  | 9.38643714 |
| 9.72709059  | 2.46700320  | 9.39955044 |
| 1.58258633  | 7.29082738  | 9.56356668 |
| 2.52283662  | 10.28661137 | 7.19794690 |
| -0.01240558 | 10.81684905 | 6.92758432 |
| 3.15685146  | 7.77380508  | 7.12591887 |
| 8.21067516  | 7.77344730  | 7.17668675 |
| 0.68695390  | 12.40116035 | 4.91549713 |
| 7.52326395  | 0.04185056  | 7.04860254 |
| 3.86941597  | 5.15463300  | 6.99018648 |
| 8.88206065  | 5.17002665  | 6.95297411 |
| 3.20357916  | 2.70327868  | 6.91284057 |
| 8.20020805  | 2.72175502  | 6.91240441 |
| 0.66419263  | 8.34461328  | 6.96048271 |
| 5.70960944  | 8.32574687  | 6.97679342 |
| 4.99505639  | 10.90857401 | 6.89259906 |
| 7.55460775  | 10.18495810 | 7.07731077 |
| 1.37638040  | 5.89413930  | 6.80137295 |
| 6.41599330  | 5.93370258  | 6.82414177 |
| 0.69869728  | 3.26037920  | 6.73083934 |
| 5.69014842  | 3.27715964  | 6.73236364 |
| -0.00711636 | 0.86306962  | 6.69255865 |
| 5.01410885  | 0.89016001  | 6.69084202 |
| 3.24534710  | 11.75707563 | 5.18184194 |
| 8.24382242  | 11.74317080 | 5.16754570 |
| 8.88061642  | 9.18171685  | 5.01200740 |
| 3.90058814  | 9.24019254  | 5.14274238 |
| 7.50097881  | 4.23957731  | 5.03884869 |
| 2.51642993  | 4.23001952  | 5.04291903 |
| 8.17468120  | 6.76588009  | 4.93047135 |
| 3.21792658  | 6.75793536  | 4.91756529 |
| 5.67544185  | 12.41355363 | 4.89323246 |
| 2.52970022  | 0.06021219  | 7.09117484 |
| 3.23161223  | 1.45765546  | 4.84659146 |
| 8.22529950  | 1.46270135  | 4.84529782 |
| 1.40134273  | 9.89280417  | 4.85762087 |
| 6.39479109  | 9.87865115  | 4.76466469 |
| 5.01579534  | 4.86611157  | 4.73778410 |
| 0.02649173  | 4.85051166  | 4.72453957 |
| 0.72974492  | 7.27910676  | 4.70904440 |

|             |             |            |
|-------------|-------------|------------|
| 5.72384253  | 7.32669761  | 4.72129868 |
| 5.75188163  | 2.18799132  | 4.51848897 |
| 0.76044915  | 2.17888129  | 4.51641932 |
| 8.92724419  | 3.16928101  | 3.13275409 |
| 3.93734455  | 3.16928101  | 3.13275409 |
| 9.65447807  | 0.51179242  | 2.92767382 |
| 4.66457796  | 0.51179242  | 2.92767382 |
| 8.19081593  | 10.75315189 | 2.92137337 |
| 3.20091629  | 10.75315189 | 2.92137337 |
| 7.52427816  | 8.16568470  | 2.89047265 |
| 2.53437829  | 8.16568470  | 2.89047265 |
| 6.46140337  | 3.88992119  | 2.81003308 |
| 1.47150326  | 3.88992119  | 2.81003308 |
| 8.23615360  | 5.59719324  | 2.75910425 |
| 3.24625349  | 5.59719324  | 2.75910425 |
| 5.72548342  | 11.29866314 | 2.69921899 |
| 0.73558354  | 11.29866314 | 2.69921899 |
| 5.02271366  | 8.84247589  | 2.64073300 |
| 0.03281343  | 8.84247589  | 2.64073300 |
| 7.16234589  | 1.15467191  | 2.58495903 |
| 2.17244577  | 1.15467191  | 2.58495903 |
| 5.69094276  | 6.28061676  | 2.47308970 |
| 0.70104283  | 6.28061676  | 2.47308970 |
| 4.72644854  | 4.52631235  | 0.98044425 |
| -0.26345146 | 4.52631235  | 0.98044425 |
| 8.98416233  | 2.08401227  | 0.94984233 |
| 3.99426270  | 2.08401227  | 0.94984233 |
| 7.49692297  | 12.16127491 | 0.88189071 |
| 2.50702286  | 12.16127491 | 0.88189071 |
| 8.92881203  | 7.14167833  | 0.77916235 |
| 3.93891239  | 7.14167833  | 0.77916235 |
| 8.23179626  | 9.65808487  | 0.74752367 |
| 3.24189639  | 9.65808487  | 0.74752367 |
| 6.50168800  | 2.71004343  | 0.73384589 |
| 1.51178777  | 2.71004343  | 0.73384589 |
| 5.78449345  | 0.24636792  | 0.66762453 |
| 0.79459333  | 0.24636792  | 0.66762453 |
| 6.40908241  | 7.83185196  | 0.60482943 |
| 1.41918242  | 7.83185196  | 0.60482943 |
| 7.18588972  | 5.31081581  | 0.60368013 |
| 2.19598985  | 5.31081581  | 0.60368013 |
| 5.68450737  | 10.28863907 | 0.50651002 |
| 0.69460732  | 10.28863907 | 0.50651002 |

# TS for CH<sub>cv</sub>+CH<sub>3</sub>->CHCH<sub>3</sub><sub>cv</sub>

1.000000000000

|             |             |             |    |
|-------------|-------------|-------------|----|
| 9.97980000  | 0.00000000  | 0.00000000  |    |
| -0.76395804 | 12.66177393 | 0.00000000  |    |
| 0.00000004  | 0.00000004  | 19.64040000 |    |
| H           | C           | O           | Fe |
| 5           | 41          | 4           | 80 |

Cart

|             |             |            |
|-------------|-------------|------------|
| 7.39166993  | 7.20857773  | 8.99667968 |
| 8.86179217  | 7.71360474  | 9.90800218 |
| 6.27159733  | 11.21058902 | 7.92620622 |
| -0.52826701 | 9.68490414  | 9.01623552 |
| 7.44727342  | 8.84441778  | 9.71045117 |
| 8.05957807  | 8.06311211  | 9.25191665 |
| 4.60513666  | 2.60281822  | 8.21485698 |
| 9.59549829  | 2.61155786  | 8.22561570 |
| 4.13683251  | 9.31680414  | 7.42622929 |
| 1.74316456  | 7.59411589  | 8.43437507 |
| 1.03482410  | 11.35578326 | 8.35403730 |
| 9.11006079  | 9.17249209  | 8.11166727 |
| 2.19111194  | 4.24962152  | 7.18974138 |
| 7.18377651  | 4.27415610  | 7.18399991 |
| 3.46396489  | 11.96085514 | 7.15350640 |
| 8.43515427  | 11.86326961 | 7.13349430 |
| -0.34103951 | 6.81124606  | 6.31539053 |
| 4.63490547  | 6.76154306  | 6.35453965 |
| 1.72694773  | 1.57942232  | 6.17812598 |
| 6.73985663  | 1.60268105  | 6.18636956 |
| 2.15187190  | 8.28259308  | 5.60248449 |
| 7.17613123  | 8.34320756  | 5.71200389 |
| 9.19725791  | 3.13385062  | 5.29880630 |
| 4.20620395  | 3.13516002  | 5.29300763 |
| 4.66942585  | 10.80376399 | 4.26582216 |
| -0.31208156 | 10.79810940 | 4.27364973 |
| 6.72427014  | 5.70966224  | 4.02452174 |
| 1.73364340  | 5.69586880  | 4.01544773 |
| 7.18009433  | 12.34939325 | 3.63402543 |
| 2.18814538  | 12.34743304 | 3.63838830 |
| 9.22894965  | 7.21353775  | 3.36038550 |
| 4.23434743  | 7.19767086  | 3.34548789 |
| 5.47292232  | 2.23055553  | 2.34193015 |
| 0.48302215  | 2.23055553  | 2.34193015 |
| 6.73540354  | 9.72874641  | 2.00704742 |

|             |             |            |
|-------------|-------------|------------|
| 1.74550355  | 9.72874641  | 2.00704742 |
| 7.98876715  | 3.77819967  | 1.47019899 |
| 2.99886727  | 3.77819967  | 1.47019899 |
| 9.21347809  | 11.29064846 | 1.28800344 |
| 4.22357798  | 11.29064846 | 1.28800344 |
| 5.52626467  | 6.13002825  | 0.45987183 |
| 0.53636485  | 6.13002825  | 0.45987183 |
| 7.45328903  | 1.12937152  | 0.40848067 |
| 2.46338916  | 1.12937152  | 0.40848067 |
| 4.75647831  | 8.73880577  | 0.18583304 |
| -0.23342146 | 8.73880577  | 0.18583304 |
| 1.07453053  | 11.35262894 | 9.55521498 |
| 4.74167767  | 2.43357604  | 9.38971231 |
| 9.72397815  | 2.44896398  | 9.40175615 |
| 1.55007506  | 7.32533664  | 9.58336833 |
| 2.51148868  | 10.30762377 | 7.21175308 |
| 0.01220336  | 10.84422285 | 6.86289204 |
| 3.14453543  | 7.80087727  | 7.14847399 |
| 8.24246370  | 7.80541819  | 7.16571715 |
| 0.68338607  | 12.40648057 | 4.90758767 |
| 7.52056929  | 0.02966870  | 7.04963555 |
| 3.87073457  | 5.14733770  | 6.99407868 |
| 8.86587032  | 5.16651719  | 6.96807669 |
| 3.19845750  | 2.69956798  | 6.91297634 |
| 8.19571041  | 2.72185482  | 6.91945396 |
| 0.66017854  | 8.36576681  | 6.98212442 |
| 5.61835194  | 8.35539583  | 6.87819445 |
| 4.98762534  | 10.90453119 | 6.90330086 |
| 7.54719225  | 10.18140842 | 7.06400948 |
| 1.37268567  | 5.89149052  | 6.79415350 |
| 6.39074176  | 5.90452506  | 6.69038788 |
| 0.69546389  | 3.25180155  | 6.73379658 |
| 5.68614274  | 3.27932465  | 6.73669849 |
| -0.00885440 | 0.85300049  | 6.69761627 |
| 5.01237599  | 0.89576046  | 6.68494737 |
| 3.23821619  | 11.75769626 | 5.17858406 |
| 8.22885778  | 11.74562744 | 5.16171809 |
| 8.86382329  | 9.18695054  | 5.00578137 |
| 3.87141283  | 9.24249089  | 5.11796498 |
| 7.50932529  | 4.22077561  | 5.02507256 |
| 2.51493731  | 4.22895279  | 5.04344017 |
| 8.17247293  | 6.76541191  | 4.94468328 |
| 3.20456862  | 6.75674652  | 4.93333684 |
| 5.67259870  | 12.41590344 | 4.89408542 |



|             |             |            |
|-------------|-------------|------------|
| 2.53188483  | 0.05704321  | 7.09207904 |
| 3.22933907  | 1.46356514  | 4.84087590 |
| 8.22405768  | 1.46573666  | 4.84859430 |
| 1.39120975  | 9.88320869  | 4.83185883 |
| 6.38443752  | 9.88030665  | 4.76165894 |
| 5.00957201  | 4.85717953  | 4.72353590 |
| 0.02369068  | 4.84936816  | 4.72863741 |
| 0.71823622  | 7.27998076  | 4.72148647 |
| 5.70688434  | 7.33110227  | 4.69670890 |
| 5.75350152  | 2.18784020  | 4.51903950 |
| 0.75869362  | 2.18181408  | 4.51520021 |
| 8.92724419  | 3.16928101  | 3.13275409 |
| 3.93734455  | 3.16928101  | 3.13275409 |
| 9.65447807  | 0.51179242  | 2.92767382 |
| 4.66457796  | 0.51179242  | 2.92767382 |
| 8.19081593  | 10.75315189 | 2.92137337 |
| 3.20091629  | 10.75315189 | 2.92137337 |
| 7.52427816  | 8.16568470  | 2.89047265 |
| 2.53437829  | 8.16568470  | 2.89047265 |
| 6.46140337  | 3.88992119  | 2.81003308 |
| 1.47150326  | 3.88992119  | 2.81003308 |
| 8.23615360  | 5.59719324  | 2.75910425 |
| 3.24625349  | 5.59719324  | 2.75910425 |
| 5.72548342  | 11.29866314 | 2.69921899 |
| 0.73558354  | 11.29866314 | 2.69921899 |
| 5.02271366  | 8.84247589  | 2.64073300 |
| 0.03281343  | 8.84247589  | 2.64073300 |
| 7.16234589  | 1.15467191  | 2.58495903 |
| 2.17244577  | 1.15467191  | 2.58495903 |
| 5.69094276  | 6.28061676  | 2.47308970 |
| 0.70104283  | 6.28061676  | 2.47308970 |
| 4.72644854  | 4.52631235  | 0.98044425 |
| -0.26345146 | 4.52631235  | 0.98044425 |
| 8.98416233  | 2.08401227  | 0.94984233 |
| 3.99426270  | 2.08401227  | 0.94984233 |
| 7.49692297  | 12.16127491 | 0.88189071 |
| 2.50702286  | 12.16127491 | 0.88189071 |
| 8.92881203  | 7.14167833  | 0.77916235 |
| 3.93891239  | 7.14167833  | 0.77916235 |
| 8.23179626  | 9.65808487  | 0.74752367 |
| 3.24189639  | 9.65808487  | 0.74752367 |
| 6.50168800  | 2.71004343  | 0.73384589 |
| 1.51178777  | 2.71004343  | 0.73384589 |
| 5.78449345  | 0.24636792  | 0.66762453 |

|            |             |            |
|------------|-------------|------------|
| 0.79459333 | 0.24636792  | 0.66762453 |
| 6.40908241 | 7.83185196  | 0.60482943 |
| 1.41918242 | 7.83185196  | 0.60482943 |
| 7.18588972 | 5.31081581  | 0.60368013 |
| 2.19598985 | 5.31081581  | 0.60368013 |
| 5.68450737 | 10.28863907 | 0.50651002 |
| 0.69460732 | 10.28863907 | 0.50651002 |

# CH<sub>2</sub> cv+CH<sub>2</sub>

1.000000000000

|             |             |             |
|-------------|-------------|-------------|
| 9.97980000  | 0.00000000  | 0.00000000  |
| -0.76395804 | 12.66177393 | 0.00000000  |
| 0.00000004  | 0.00000004  | 19.64040000 |

| H | C  | O | Fe |
|---|----|---|----|
| 5 | 41 | 4 | 80 |

Cart

|             |             |            |
|-------------|-------------|------------|
| 6.10063418  | 7.00196774  | 9.22801342 |
| 7.72847046  | 7.40188505  | 8.75450077 |
| 0.26605246  | 8.64969432  | 8.51063011 |
| 8.97875318  | 9.59174322  | 9.09502456 |
| 6.24780750  | 11.26542102 | 7.95332116 |
| 6.63974831  | 7.21539979  | 8.29363321 |
| 4.60484558  | 2.61166576  | 8.21185715 |
| 9.59399695  | 2.58367099  | 8.21631405 |
| 4.19717260  | 9.25728246  | 7.37024788 |
| 2.59664705  | 7.11048714  | 8.74197830 |
| 0.96867996  | 11.37576556 | 8.38430018 |
| 9.26378500  | 9.24111664  | 8.08734095 |
| 2.19467049  | 4.23595080  | 7.17335242 |
| 7.17676684  | 4.26598275  | 7.17900872 |
| 3.46086218  | 11.92319551 | 7.16130132 |
| 8.43177735  | 11.87807931 | 7.14264349 |
| -0.33991650 | 6.79109546  | 6.31043622 |
| 4.67919557  | 6.70166288  | 6.25034881 |
| 1.73248043  | 1.57499714  | 6.17857146 |
| 6.73147408  | 1.60583525  | 6.18241579 |
| 2.13962126  | 8.25652446  | 5.65998081 |
| 7.18341045  | 8.36181779  | 5.64979855 |
| 9.19328439  | 3.12728996  | 5.29175986 |
| 4.20494375  | 3.13149632  | 5.28188136 |
| 4.66346142  | 10.76514706 | 4.26274384 |
| -0.30624336 | 10.79075412 | 4.27005063 |
| 6.72456330  | 5.70382637  | 4.02089248 |

|             |             |            |
|-------------|-------------|------------|
| 1.73067789  | 5.69302105  | 4.01499026 |
| 7.18040360  | 12.34635685 | 3.63763538 |
| 2.19499766  | 12.34041773 | 3.64160491 |
| 9.23010342  | 7.21006105  | 3.35270421 |
| 4.23587664  | 7.20300733  | 3.33602005 |
| 5.47292232  | 2.23055553  | 2.34193015 |
| 0.48302215  | 2.23055553  | 2.34193015 |
| 6.73540354  | 9.72874641  | 2.00704742 |
| 1.74550355  | 9.72874641  | 2.00704742 |
| 7.98876715  | 3.77819967  | 1.47019899 |
| 2.99886727  | 3.77819967  | 1.47019899 |
| 9.21347809  | 11.29064846 | 1.28800344 |
| 4.22357798  | 11.29064846 | 1.28800344 |
| 5.52626467  | 6.13002825  | 0.45987183 |
| 0.53636485  | 6.13002825  | 0.45987183 |
| 7.45328903  | 1.12937152  | 0.40848067 |
| 2.46338916  | 1.12937152  | 0.40848067 |
| 4.75647831  | 8.73880577  | 0.18583304 |
| -0.23342146 | 8.73880577  | 0.18583304 |
| 1.10981588  | 11.44041067 | 9.57142123 |
| 4.73075796  | 2.43996712  | 9.38840025 |
| 9.71716313  | 2.39615728  | 9.38933715 |
| 2.24629775  | 6.80175638  | 9.81956030 |
| 2.52579073  | 10.24319924 | 7.18227975 |
| -0.02318775 | 10.82742576 | 6.93100966 |
| 3.21301423  | 7.71301508  | 7.18379812 |
| 8.20476132  | 7.79290285  | 7.18041215 |
| 0.68948549  | 12.39971956 | 4.91293250 |
| 7.51768797  | 0.04115786  | 7.04607899 |
| 3.86370210  | 5.16685475  | 7.03529128 |
| 8.87995208  | 5.17043497  | 7.00593425 |
| 3.20314004  | 2.69496606  | 6.90496363 |
| 8.19121816  | 2.71903741  | 6.91466842 |
| 0.64179419  | 8.40437076  | 6.89859832 |
| 5.72852370  | 8.28608241  | 6.96597741 |
| 5.00125381  | 10.88052224 | 6.91131783 |
| 7.51124922  | 10.19828173 | 7.05203156 |
| 1.37786811  | 5.88166239  | 6.77820118 |
| 6.42693209  | 5.92899042  | 6.82112350 |
| 0.69200195  | 3.24988421  | 6.73505796 |
| 5.68165610  | 3.27259819  | 6.73001679 |
| -0.00786629 | 0.85771665  | 6.68995076 |
| 5.00976030  | 0.87063311  | 6.68949021 |
| 3.25059362  | 11.73774552 | 5.18082117 |

|             |             |            |
|-------------|-------------|------------|
| 8.24307371  | 11.74515278 | 5.16731457 |
| 8.88169597  | 9.18615268  | 5.02265251 |
| 3.87297010  | 9.20814411  | 5.17249919 |
| 7.50804093  | 4.23194544  | 5.03969408 |
| 2.51674236  | 4.22692439  | 5.04265610 |
| 8.17551022  | 6.76889243  | 4.94165855 |
| 3.19948974  | 6.76186491  | 4.91715094 |
| 5.66465982  | 12.40884256 | 4.89049540 |
| 2.53537139  | 0.04323547  | 7.08373782 |
| 3.23583720  | 1.44751244  | 4.84196559 |
| 8.21928706  | 1.46042192  | 4.84466410 |
| 1.39729245  | 9.87790011  | 4.83583230 |
| 6.38526180  | 9.88454867  | 4.75528693 |
| 5.00398700  | 4.87147287  | 4.74870389 |
| 0.01999079  | 4.84664160  | 4.73736969 |
| 0.71741826  | 7.26972991  | 4.72236593 |
| 5.72471561  | 7.32341597  | 4.70153339 |
| 5.75238065  | 2.18693961  | 4.51579632 |
| 0.76095213  | 2.17698209  | 4.51592591 |
| 8.92724419  | 3.16928101  | 3.13275409 |
| 3.93734455  | 3.16928101  | 3.13275409 |
| 9.65447807  | 0.51179242  | 2.92767382 |
| 4.66457796  | 0.51179242  | 2.92767382 |
| 8.19081593  | 10.75315189 | 2.92137337 |
| 3.20091629  | 10.75315189 | 2.92137337 |
| 7.52427816  | 8.16568470  | 2.89047265 |
| 2.53437829  | 8.16568470  | 2.89047265 |
| 6.46140337  | 3.88992119  | 2.81003308 |
| 1.47150326  | 3.88992119  | 2.81003308 |
| 8.23615360  | 5.59719324  | 2.75910425 |
| 3.24625349  | 5.59719324  | 2.75910425 |
| 5.72548342  | 11.29866314 | 2.69921899 |
| 0.73558354  | 11.29866314 | 2.69921899 |
| 5.02271366  | 8.84247589  | 2.64073300 |
| 0.03281343  | 8.84247589  | 2.64073300 |
| 7.16234589  | 1.15467191  | 2.58495903 |
| 2.17244577  | 1.15467191  | 2.58495903 |
| 5.69094276  | 6.28061676  | 2.47308970 |
| 0.70104283  | 6.28061676  | 2.47308970 |
| 4.72644854  | 4.52631235  | 0.98044425 |
| -0.26345146 | 4.52631235  | 0.98044425 |
| 8.98416233  | 2.08401227  | 0.94984233 |
| 3.99426270  | 2.08401227  | 0.94984233 |
| 7.49692297  | 12.16127491 | 0.88189071 |

|            |             |            |
|------------|-------------|------------|
| 2.50702286 | 12.16127491 | 0.88189071 |
| 8.92881203 | 7.14167833  | 0.77916235 |
| 3.93891239 | 7.14167833  | 0.77916235 |
| 8.23179626 | 9.65808487  | 0.74752367 |
| 3.24189639 | 9.65808487  | 0.74752367 |
| 6.50168800 | 2.71004343  | 0.73384589 |
| 1.51178777 | 2.71004343  | 0.73384589 |
| 5.78449345 | 0.24636792  | 0.66762453 |
| 0.79459333 | 0.24636792  | 0.66762453 |
| 6.40908241 | 7.83185196  | 0.60482943 |
| 1.41918242 | 7.83185196  | 0.60482943 |
| 7.18588972 | 5.31081581  | 0.60368013 |
| 2.19598985 | 5.31081581  | 0.60368013 |
| 5.68450737 | 10.28863907 | 0.50651002 |
| 0.69460732 | 10.28863907 | 0.50651002 |

# TS for  $\text{CH}_2\text{Cv}+\text{CH}_2\rightarrow\text{CH}_2\text{CH}_2+\text{Cv}$

1.000000000000

|             |             |             |    |
|-------------|-------------|-------------|----|
| 9.97980000  | 0.00000000  | 0.00000000  |    |
| -0.76395804 | 12.66177393 | 0.00000000  |    |
| 0.00000004  | 0.00000004  | 19.64040000 |    |
| H           | C           | O           | Fe |
| 5           | 41          | 4           | 80 |

Cart

|             |             |            |
|-------------|-------------|------------|
| 5.97711174  | 7.50664634  | 8.94242248 |
| 7.35686705  | 6.44988219  | 9.31135915 |
| 8.75979557  | 8.95281056  | 9.33014671 |
| 6.98960620  | 9.20937628  | 9.38131547 |
| 6.26686524  | 11.23965424 | 7.94783601 |
| 6.92596623  | 7.09933095  | 8.53615276 |
| 4.60860790  | 2.62096660  | 8.22490082 |
| 9.59817432  | 2.54148025  | 8.21066288 |
| 4.15722236  | 9.29297785  | 7.33547737 |
| 2.39248689  | 7.21916369  | 8.65891542 |
| 0.89390358  | 10.56747044 | 8.31610181 |
| 7.83335248  | 8.93407847  | 8.73662096 |
| 2.19102515  | 4.25805698  | 7.17312792 |
| 7.20680407  | 4.27407862  | 7.18031410 |
| 3.45412274  | 11.93525292 | 7.18650294 |
| 8.48698642  | 11.81989592 | 7.16266159 |
| -0.34434637 | 6.92291907  | 6.42075934 |
| 4.68446454  | 6.69530445  | 6.27788199 |
| 1.73967342  | 1.61183842  | 6.15374938 |

|             |             |            |
|-------------|-------------|------------|
| 6.74597018  | 1.59470827  | 6.19414395 |
| 2.14878622  | 8.28565627  | 5.60793737 |
| 7.19478315  | 8.34852131  | 5.64198407 |
| 9.19816032  | 3.14020347  | 5.29471491 |
| 4.21887162  | 3.14424487  | 5.29936275 |
| 4.67041244  | 10.79429916 | 4.27075837 |
| -0.29643950 | 10.81846246 | 4.30470227 |
| 6.72924203  | 5.70445033  | 4.01590898 |
| 1.73779371  | 5.70273586  | 4.02089371 |
| 7.17970904  | 12.34774304 | 3.63726294 |
| 2.20054380  | 12.34936738 | 3.63349070 |
| 9.23028556  | 7.20731982  | 3.36284171 |
| 4.23723037  | 7.20220951  | 3.33312394 |
| 5.47292232  | 2.23055553  | 2.34193015 |
| 0.48302215  | 2.23055553  | 2.34193015 |
| 6.73540354  | 9.72874641  | 2.00704742 |
| 1.74550355  | 9.72874641  | 2.00704742 |
| 7.98876715  | 3.77819967  | 1.47019899 |
| 2.99886727  | 3.77819967  | 1.47019899 |
| 9.21347809  | 11.29064846 | 1.28800344 |
| 4.22357798  | 11.29064846 | 1.28800344 |
| 5.52626467  | 6.13002825  | 0.45987183 |
| 0.53636485  | 6.13002825  | 0.45987183 |
| 7.45328903  | 1.12937152  | 0.40848067 |
| 2.46338916  | 1.12937152  | 0.40848067 |
| 4.75647831  | 8.73880577  | 0.18583304 |
| -0.23342146 | 8.73880577  | 0.18583304 |
| 0.93949112  | 10.57611328 | 9.51279613 |
| 4.74824700  | 2.46934662  | 9.40298760 |
| 9.75664275  | 2.36363279  | 9.38271790 |
| 1.92859752  | 6.98168498  | 9.71346847 |
| 2.54236435  | 10.27791030 | 7.14444349 |
| 0.05611775  | 10.89917346 | 6.72749571 |
| 3.19170803  | 7.73532916  | 7.15301777 |
| 8.12181696  | 7.77462824  | 7.17655734 |
| 0.69514934  | 12.45080709 | 4.86983307 |
| 7.55905892  | 0.02468442  | 7.05575418 |
| 3.86478328  | 5.17475674  | 7.04604632 |
| 8.90908972  | 5.18999744  | 6.92991759 |
| 3.21635744  | 2.72132745  | 6.91644259 |
| 8.20543548  | 2.71834391  | 6.91809944 |
| 0.68613235  | 8.52106252  | 6.90376893 |
| 5.67324805  | 8.31553635  | 6.89316873 |
| 5.00464919  | 10.90287142 | 6.89520126 |

|            |             |            |
|------------|-------------|------------|
| 7.52831551 | 10.17492523 | 7.14660264 |
| 1.35934709 | 5.90361554  | 6.75760677 |
| 6.45489970 | 5.93156700  | 6.82682398 |
| 0.69795609 | 3.25672078  | 6.73119914 |
| 5.70281784 | 3.27300394  | 6.73911723 |
| 0.01837673 | 0.84086447  | 6.70751554 |
| 5.01430778 | 0.88267478  | 6.71011697 |
| 3.24472973 | 11.75458163 | 5.18325443 |
| 8.22903300 | 11.74135160 | 5.17100262 |
| 8.88597587 | 9.19818227  | 5.05965645 |
| 3.88270001 | 9.22484408  | 5.15199741 |
| 7.51275252 | 4.23983566  | 5.03741873 |
| 2.52527370 | 4.23417065  | 5.04607160 |
| 8.19430574 | 6.76628893  | 4.94342864 |
| 3.20628221 | 6.76489444  | 4.91294392 |
| 5.67857245 | 12.41561813 | 4.90254619 |
| 2.52842277 | 0.07350150  | 7.03449618 |
| 3.24930737 | 1.48127294  | 4.83783710 |
| 8.22955412 | 1.46448501  | 4.84864292 |
| 1.42340369 | 9.87946692  | 4.73219869 |
| 6.39207150 | 9.89218678  | 4.75706662 |
| 5.01265027 | 4.87605384  | 4.75979498 |
| 0.03361948 | 4.84275766  | 4.70092721 |
| 0.71391572 | 7.28624785  | 4.73133070 |
| 5.73220025 | 7.31905419  | 4.69713989 |
| 5.76017048 | 2.18926853  | 4.52179443 |
| 0.76000083 | 2.19448380  | 4.50958593 |
| 8.92724419 | 3.16928101  | 3.13275409 |
| 3.93734455 | 3.16928101  | 3.13275409 |
| 9.65447807 | 0.51179242  | 2.92767382 |
| 4.66457796 | 0.51179242  | 2.92767382 |
| 8.19081593 | 10.75315189 | 2.92137337 |
| 3.20091629 | 10.75315189 | 2.92137337 |
| 7.52427816 | 8.16568470  | 2.89047265 |
| 2.53437829 | 8.16568470  | 2.89047265 |
| 6.46140337 | 3.88992119  | 2.81003308 |
| 1.47150326 | 3.88992119  | 2.81003308 |
| 8.23615360 | 5.59719324  | 2.75910425 |
| 3.24625349 | 5.59719324  | 2.75910425 |
| 5.72548342 | 11.29866314 | 2.69921899 |
| 0.73558354 | 11.29866314 | 2.69921899 |
| 5.02271366 | 8.84247589  | 2.64073300 |
| 0.03281343 | 8.84247589  | 2.64073300 |
| 7.16234589 | 1.15467191  | 2.58495903 |

|             |             |            |
|-------------|-------------|------------|
| 2.17244577  | 1.15467191  | 2.58495903 |
| 5.69094276  | 6.28061676  | 2.47308970 |
| 0.70104283  | 6.28061676  | 2.47308970 |
| 4.72644854  | 4.52631235  | 0.98044425 |
| -0.26345146 | 4.52631235  | 0.98044425 |
| 8.98416233  | 2.08401227  | 0.94984233 |
| 3.99426270  | 2.08401227  | 0.94984233 |
| 7.49692297  | 12.16127491 | 0.88189071 |
| 2.50702286  | 12.16127491 | 0.88189071 |
| 8.92881203  | 7.14167833  | 0.77916235 |
| 3.93891239  | 7.14167833  | 0.77916235 |
| 8.23179626  | 9.65808487  | 0.74752367 |
| 3.24189639  | 9.65808487  | 0.74752367 |
| 6.50168800  | 2.71004343  | 0.73384589 |
| 1.51178777  | 2.71004343  | 0.73384589 |
| 5.78449345  | 0.24636792  | 0.66762453 |
| 0.79459333  | 0.24636792  | 0.66762453 |
| 6.40908241  | 7.83185196  | 0.60482943 |
| 1.41918242  | 7.83185196  | 0.60482943 |
| 7.18588972  | 5.31081581  | 0.60368013 |
| 2.19598985  | 5.31081581  | 0.60368013 |
| 5.68450737  | 10.28863907 | 0.50651002 |
| 0.69460732  | 10.28863907 | 0.50651002 |

# CH<sub>2</sub> C<sub>v</sub>+CH<sub>3</sub>

1.000000000000

|             |             |             |    |
|-------------|-------------|-------------|----|
| 9.97980000  | 0.00000000  | 0.00000000  |    |
| -0.76395804 | 12.66177393 | 0.00000000  |    |
| 0.00000004  | 0.00000004  | 19.64040000 |    |
| H           | C           | O           | Fe |
| 6           | 41          | 4           | 80 |

Cart

|            |             |            |
|------------|-------------|------------|
| 5.89410204 | 7.93102969  | 9.03498812 |
| 7.56777830 | 7.41892521  | 9.27321967 |
| 0.13678149 | 8.53819528  | 8.50655079 |
| 8.99316884 | 9.64362594  | 9.10471469 |
| 6.32240867 | 6.21801259  | 8.87574761 |
| 6.25310097 | 11.23297846 | 7.95853713 |
| 6.67781286 | 7.24846408  | 8.63499059 |
| 4.59747313 | 2.59062762  | 8.21188929 |
| 9.57575907 | 2.54560315  | 8.21919835 |
| 4.15865731 | 9.28217822  | 7.34633121 |
| 2.57729677 | 7.18539220  | 8.78337019 |



|             |             |            |
|-------------|-------------|------------|
| 0.95763338  | 11.37696892 | 8.37925019 |
| 9.22121334  | 9.25206102  | 8.09775546 |
| 2.19326468  | 4.22882221  | 7.17853400 |
| 7.19716815  | 4.23939780  | 7.17533152 |
| 3.45480887  | 11.92889082 | 7.16168957 |
| 8.43135027  | 11.85704436 | 7.13047373 |
| -0.33748640 | 6.79283321  | 6.32733150 |
| 4.67393449  | 6.72740988  | 6.30636275 |
| 1.73097939  | 1.56828974  | 6.17294940 |
| 6.73463264  | 1.58388539  | 6.17872566 |
| 2.12706687  | 8.25128729  | 5.66879809 |
| 7.20373201  | 8.34197772  | 5.70218652 |
| 9.19399592  | 3.12444758  | 5.29496661 |
| 4.20940403  | 3.12951490  | 5.28427519 |
| 4.66495081  | 10.75281103 | 4.26308969 |
| -0.30176601 | 10.78324350 | 4.26758391 |
| 6.72364375  | 5.70102023  | 4.01989203 |
| 1.73534392  | 5.69390340  | 4.01561423 |
| 7.18231244  | 12.34379225 | 3.63673145 |
| 2.19674636  | 12.33954838 | 3.63863895 |
| 9.23237910  | 7.21366328  | 3.36507693 |
| 4.24110138  | 7.20084202  | 3.35328770 |
| 5.47292232  | 2.23055553  | 2.34193015 |
| 0.48302215  | 2.23055553  | 2.34193015 |
| 6.73540354  | 9.72874641  | 2.00704742 |
| 1.74550355  | 9.72874641  | 2.00704742 |
| 7.98876715  | 3.77819967  | 1.47019899 |
| 2.99886727  | 3.77819967  | 1.47019899 |
| 9.21347809  | 11.29064846 | 1.28800344 |
| 4.22357798  | 11.29064846 | 1.28800344 |
| 5.52626467  | 6.13002825  | 0.45987183 |
| 0.53636485  | 6.13002825  | 0.45987183 |
| 7.45328903  | 1.12937152  | 0.40848067 |
| 2.46338916  | 1.12937152  | 0.40848067 |
| 4.75647831  | 8.73880577  | 0.18583304 |
| -0.23342146 | 8.73880577  | 0.18583304 |
| 1.07637907  | 11.46334710 | 9.56756825 |
| 4.71038651  | 2.41510928  | 9.38864458 |
| 9.71216297  | 2.36919081  | 9.39447747 |
| 2.21805510  | 6.90709143  | 9.86484154 |
| 2.50967178  | 10.26059468 | 7.18050344 |
| -0.02200350 | 10.80802555 | 6.92653382 |
| 3.19404231  | 7.71937491  | 7.19930121 |
| 8.20048138  | 7.76376886  | 7.19255402 |

|             |             |            |
|-------------|-------------|------------|
| 0.69047883  | 12.39506352 | 4.90962888 |
| 7.51932111  | 0.01817727  | 7.04951798 |
| 3.86944477  | 5.15367374  | 7.01945855 |
| 8.89281956  | 5.14164062  | 6.95558581 |
| 3.20203637  | 2.68897954  | 6.90315913 |
| 8.19590319  | 2.69440513  | 6.91071021 |
| 0.62131503  | 8.39604870  | 6.90180722 |
| 5.72040150  | 8.32111281  | 6.98106289 |
| 4.99714584  | 10.88972459 | 6.91454840 |
| 7.52380469  | 10.16541895 | 7.04209199 |
| 1.37998566  | 5.87012073  | 6.76715527 |
| 6.42877678  | 5.90957689  | 6.82530199 |
| 0.69494077  | 3.23391808  | 6.73950018 |
| 5.68706446  | 3.25788994  | 6.73546514 |
| -0.00437306 | 0.83996589  | 6.69226136 |
| 5.01028362  | 0.86778499  | 6.68934329 |
| 3.25204682  | 11.73553014 | 5.17831691 |
| 8.24617220  | 11.73570242 | 5.16241702 |
| 8.88428539  | 9.16945182  | 4.99659166 |
| 3.88009226  | 9.20299651  | 5.19755634 |
| 7.50046571  | 4.22551155  | 5.04137093 |
| 2.51858937  | 4.22235603  | 5.04178396 |
| 8.17483263  | 6.74850063  | 4.94416410 |
| 3.20681864  | 6.75803178  | 4.93218284 |
| 5.66831596  | 12.39841370 | 4.89370654 |
| 2.52970392  | 0.04121157  | 7.08052104 |
| 3.23750369  | 1.44621611  | 4.83951962 |
| 8.22185662  | 1.45236439  | 4.83964963 |
| 1.39882324  | 9.86929064  | 4.83904452 |
| 6.38931639  | 9.86316109  | 4.76645679 |
| 5.00972513  | 4.86483141  | 4.74945545 |
| 0.02658884  | 4.83172293  | 4.71787122 |
| 0.71918929  | 7.25643883  | 4.72824328 |
| 5.72255274  | 7.31696098  | 4.72857472 |
| 5.75325529  | 2.18171311  | 4.51692037 |
| 0.76084852  | 2.17392073  | 4.51523235 |
| 8.92724419  | 3.16928101  | 3.13275409 |
| 3.93734455  | 3.16928101  | 3.13275409 |
| 9.65447807  | 0.51179242  | 2.92767382 |
| 4.66457796  | 0.51179242  | 2.92767382 |
| 8.19081593  | 10.75315189 | 2.92137337 |
| 3.20091629  | 10.75315189 | 2.92137337 |
| 7.52427816  | 8.16568470  | 2.89047265 |
| 2.53437829  | 8.16568470  | 2.89047265 |

|             |             |            |
|-------------|-------------|------------|
| 6.46140337  | 3.88992119  | 2.81003308 |
| 1.47150326  | 3.88992119  | 2.81003308 |
| 8.23615360  | 5.59719324  | 2.75910425 |
| 3.24625349  | 5.59719324  | 2.75910425 |
| 5.72548342  | 11.29866314 | 2.69921899 |
| 0.73558354  | 11.29866314 | 2.69921899 |
| 5.02271366  | 8.84247589  | 2.64073300 |
| 0.03281343  | 8.84247589  | 2.64073300 |
| 7.16234589  | 1.15467191  | 2.58495903 |
| 2.17244577  | 1.15467191  | 2.58495903 |
| 5.69094276  | 6.28061676  | 2.47308970 |
| 0.70104283  | 6.28061676  | 2.47308970 |
| 4.72644854  | 4.52631235  | 0.98044425 |
| -0.26345146 | 4.52631235  | 0.98044425 |
| 8.98416233  | 2.08401227  | 0.94984233 |
| 3.99426270  | 2.08401227  | 0.94984233 |
| 7.49692297  | 12.16127491 | 0.88189071 |
| 2.50702286  | 12.16127491 | 0.88189071 |
| 8.92881203  | 7.14167833  | 0.77916235 |
| 3.93891239  | 7.14167833  | 0.77916235 |
| 8.23179626  | 9.65808487  | 0.74752367 |
| 3.24189639  | 9.65808487  | 0.74752367 |
| 6.50168800  | 2.71004343  | 0.73384589 |
| 1.51178777  | 2.71004343  | 0.73384589 |
| 5.78449345  | 0.24636792  | 0.66762453 |
| 0.79459333  | 0.24636792  | 0.66762453 |
| 6.40908241  | 7.83185196  | 0.60482943 |
| 1.41918242  | 7.83185196  | 0.60482943 |
| 7.18588972  | 5.31081581  | 0.60368013 |
| 2.19598985  | 5.31081581  | 0.60368013 |
| 5.68450737  | 10.28863907 | 0.50651002 |
| 0.69460732  | 10.28863907 | 0.50651002 |

# CH<sub>3</sub> cv+CH<sub>2</sub>

1.000000000000

|             |             |             |    |
|-------------|-------------|-------------|----|
| 9.97980000  | 0.00000000  | 0.00000000  |    |
| -0.76395804 | 12.66177393 | 0.00000000  |    |
| 0.00000004  | 0.00000004  | 19.64040000 |    |
| H           | C           | O           | Fe |
| 6           | 41          | 4           | 80 |

Cart

|            |            |            |
|------------|------------|------------|
| 5.89410204 | 7.93102969 | 9.03498812 |
| 7.56777830 | 7.41892521 | 9.27321967 |
| 0.13678149 | 8.53819528 | 8.50655079 |

|             |             |            |
|-------------|-------------|------------|
| 8.99316884  | 9.64362594  | 9.10471469 |
| 6.32240867  | 6.21801259  | 8.87574761 |
| 6.25310097  | 11.23297846 | 7.95853713 |
| 6.67781286  | 7.24846408  | 8.63499059 |
| 4.59747313  | 2.59062762  | 8.21188929 |
| 9.57575907  | 2.54560315  | 8.21919835 |
| 4.15865731  | 9.28217822  | 7.34633121 |
| 2.57729677  | 7.18539220  | 8.78337019 |
| 0.95763338  | 11.37696892 | 8.37925019 |
| 9.22121334  | 9.25206102  | 8.09775546 |
| 2.19326468  | 4.22882221  | 7.17853400 |
| 7.19716815  | 4.23939780  | 7.17533152 |
| 3.45480887  | 11.92889082 | 7.16168957 |
| 8.43135027  | 11.85704436 | 7.13047373 |
| -0.33748640 | 6.79283321  | 6.32733150 |
| 4.67393449  | 6.72740988  | 6.30636275 |
| 1.73097939  | 1.56828974  | 6.17294940 |
| 6.73463264  | 1.58388539  | 6.17872566 |
| 2.12706687  | 8.25128729  | 5.66879809 |
| 7.20373201  | 8.34197772  | 5.70218652 |
| 9.19399592  | 3.12444758  | 5.29496661 |
| 4.20940403  | 3.12951490  | 5.28427519 |
| 4.66495081  | 10.75281103 | 4.26308969 |
| -0.30176601 | 10.78324350 | 4.26758391 |
| 6.72364375  | 5.70102023  | 4.01989203 |
| 1.73534392  | 5.69390340  | 4.01561423 |
| 7.18231244  | 12.34379225 | 3.63673145 |
| 2.19674636  | 12.33954838 | 3.63863895 |
| 9.23237910  | 7.21366328  | 3.36507693 |
| 4.24110138  | 7.20084202  | 3.35328770 |
| 5.47292232  | 2.23055553  | 2.34193015 |
| 0.48302215  | 2.23055553  | 2.34193015 |
| 6.73540354  | 9.72874641  | 2.00704742 |
| 1.74550355  | 9.72874641  | 2.00704742 |
| 7.98876715  | 3.77819967  | 1.47019899 |
| 2.99886727  | 3.77819967  | 1.47019899 |
| 9.21347809  | 11.29064846 | 1.28800344 |
| 4.22357798  | 11.29064846 | 1.28800344 |
| 5.52626467  | 6.13002825  | 0.45987183 |
| 0.53636485  | 6.13002825  | 0.45987183 |
| 7.45328903  | 1.12937152  | 0.40848067 |
| 2.46338916  | 1.12937152  | 0.40848067 |
| 4.75647831  | 8.73880577  | 0.18583304 |
| -0.23342146 | 8.73880577  | 0.18583304 |

|             |             |            |
|-------------|-------------|------------|
| 1.07637907  | 11.46334710 | 9.56756825 |
| 4.71038651  | 2.41510928  | 9.38864458 |
| 9.71216297  | 2.36919081  | 9.39447747 |
| 2.21805510  | 6.90709143  | 9.86484154 |
| 2.50967178  | 10.26059468 | 7.18050344 |
| -0.02200350 | 10.80802555 | 6.92653382 |
| 3.19404231  | 7.71937491  | 7.19930121 |
| 8.20048138  | 7.76376886  | 7.19255402 |
| 0.69047883  | 12.39506352 | 4.90962888 |
| 7.51932111  | 0.01817727  | 7.04951798 |
| 3.86944477  | 5.15367374  | 7.01945855 |
| 8.89281956  | 5.14164062  | 6.95558581 |
| 3.20203637  | 2.68897954  | 6.90315913 |
| 8.19590319  | 2.69440513  | 6.91071021 |
| 0.62131503  | 8.39604870  | 6.90180722 |
| 5.72040150  | 8.32111281  | 6.98106289 |
| 4.99714584  | 10.88972459 | 6.91454840 |
| 7.52380469  | 10.16541895 | 7.04209199 |
| 1.37998566  | 5.87012073  | 6.76715527 |
| 6.42877678  | 5.90957689  | 6.82530199 |
| 0.69494077  | 3.23391808  | 6.73950018 |
| 5.68706446  | 3.25788994  | 6.73546514 |
| -0.00437306 | 0.83996589  | 6.69226136 |
| 5.01028362  | 0.86778499  | 6.68934329 |
| 3.25204682  | 11.73553014 | 5.17831691 |
| 8.24617220  | 11.73570242 | 5.16241702 |
| 8.88428539  | 9.16945182  | 4.99659166 |
| 3.88009226  | 9.20299651  | 5.19755634 |
| 7.50046571  | 4.22551155  | 5.04137093 |
| 2.51858937  | 4.22235603  | 5.04178396 |
| 8.17483263  | 6.74850063  | 4.94416410 |
| 3.20681864  | 6.75803178  | 4.93218284 |
| 5.66831596  | 12.39841370 | 4.89370654 |
| 2.52970392  | 0.04121157  | 7.08052104 |
| 3.23750369  | 1.44621611  | 4.83951962 |
| 8.22185662  | 1.45236439  | 4.83964963 |
| 1.39882324  | 9.86929064  | 4.83904452 |
| 6.38931639  | 9.86316109  | 4.76645679 |
| 5.00972513  | 4.86483141  | 4.74945545 |
| 0.02658884  | 4.83172293  | 4.71787122 |
| 0.71918929  | 7.25643883  | 4.72824328 |
| 5.72255274  | 7.31696098  | 4.72857472 |
| 5.75325529  | 2.18171311  | 4.51692037 |
| 0.76084852  | 2.17392073  | 4.51523235 |

|             |             |            |
|-------------|-------------|------------|
| 8.92724419  | 3.16928101  | 3.13275409 |
| 3.93734455  | 3.16928101  | 3.13275409 |
| 9.65447807  | 0.51179242  | 2.92767382 |
| 4.66457796  | 0.51179242  | 2.92767382 |
| 8.19081593  | 10.75315189 | 2.92137337 |
| 3.20091629  | 10.75315189 | 2.92137337 |
| 7.52427816  | 8.16568470  | 2.89047265 |
| 2.53437829  | 8.16568470  | 2.89047265 |
| 6.46140337  | 3.88992119  | 2.81003308 |
| 1.47150326  | 3.88992119  | 2.81003308 |
| 8.23615360  | 5.59719324  | 2.75910425 |
| 3.24625349  | 5.59719324  | 2.75910425 |
| 5.72548342  | 11.29866314 | 2.69921899 |
| 0.73558354  | 11.29866314 | 2.69921899 |
| 5.02271366  | 8.84247589  | 2.64073300 |
| 0.03281343  | 8.84247589  | 2.64073300 |
| 7.16234589  | 1.15467191  | 2.58495903 |
| 2.17244577  | 1.15467191  | 2.58495903 |
| 5.69094276  | 6.28061676  | 2.47308970 |
| 0.70104283  | 6.28061676  | 2.47308970 |
| 4.72644854  | 4.52631235  | 0.98044425 |
| -0.26345146 | 4.52631235  | 0.98044425 |
| 8.98416233  | 2.08401227  | 0.94984233 |
| 3.99426270  | 2.08401227  | 0.94984233 |
| 7.49692297  | 12.16127491 | 0.88189071 |
| 2.50702286  | 12.16127491 | 0.88189071 |
| 8.92881203  | 7.14167833  | 0.77916235 |
| 3.93891239  | 7.14167833  | 0.77916235 |
| 8.23179626  | 9.65808487  | 0.74752367 |
| 3.24189639  | 9.65808487  | 0.74752367 |
| 6.50168800  | 2.71004343  | 0.73384589 |
| 1.51178777  | 2.71004343  | 0.73384589 |
| 5.78449345  | 0.24636792  | 0.66762453 |
| 0.79459333  | 0.24636792  | 0.66762453 |
| 6.40908241  | 7.83185196  | 0.60482943 |
| 1.41918242  | 7.83185196  | 0.60482943 |
| 7.18588972  | 5.31081581  | 0.60368013 |
| 2.19598985  | 5.31081581  | 0.60368013 |
| 5.68450737  | 10.28863907 | 0.50651002 |
| 0.69460732  | 10.28863907 | 0.50651002 |

# TS for  $\text{CH}_3\text{Cv} + \text{CH}_2 \rightarrow \text{CH}_2\text{CH}_3 + \text{Cv}$

1.000000000000

|             |             |             |    |
|-------------|-------------|-------------|----|
| 9.97980000  | 0.00000000  | 0.00000000  |    |
| -0.76395804 | 12.66177393 | 0.00000000  |    |
| 0.00000004  | 0.00000004  | 19.64040000 |    |
| H           | C           | O           | Fe |
| 6           | 41          | 4           | 80 |

Cart

|             |             |            |
|-------------|-------------|------------|
| 7.02760071  | 8.26567634  | 9.77683640 |
| 8.40304629  | 7.10479825  | 9.95007146 |
| -0.23753997 | 8.80065261  | 9.10298014 |
| 8.35753159  | 9.83062601  | 8.92299814 |
| 6.96845991  | 6.67296424  | 8.99940592 |
| 6.27108689  | 11.20169755 | 7.93267348 |
| 7.63854866  | 7.50591160  | 9.27647490 |
| 4.60527176  | 2.62564704  | 8.22024440 |
| 9.59834206  | 2.59959073  | 8.21876090 |
| 4.12750196  | 9.31296320  | 7.39096093 |
| 2.45367988  | 7.17086798  | 8.70761171 |
| 1.06033832  | 10.97769176 | 8.36906917 |
| 8.86616032  | 8.95680041  | 8.44290650 |
| 2.18617854  | 4.26048910  | 7.16882008 |
| 7.19537760  | 4.26472464  | 7.17523371 |
| 3.46335082  | 11.94500384 | 7.16244124 |
| 8.46227168  | 11.85478318 | 7.14575254 |
| -0.35470054 | 6.83180072  | 6.35780678 |
| 4.65171401  | 6.75423096  | 6.30907883 |
| 1.73624105  | 1.60901218  | 6.16363409 |
| 6.74412356  | 1.59247475  | 6.18806680 |
| 2.10385209  | 8.29568135  | 5.66543488 |
| 7.19171576  | 8.34009798  | 5.72578540 |
| 9.19831431  | 3.13298784  | 5.29468612 |
| 4.21087363  | 3.14280036  | 5.29244451 |
| 4.66846186  | 10.78377035 | 4.27029357 |
| -0.30344663 | 10.80910023 | 4.28636483 |
| 6.72532918  | 5.71035307  | 4.02687196 |
| 1.73366307  | 5.70969984  | 4.02108087 |
| 7.18028316  | 12.34854640 | 3.63574115 |
| 2.19578644  | 12.34733186 | 3.63465589 |
| 9.22800601  | 7.21283039  | 3.35958815 |
| 4.23323767  | 7.20029987  | 3.34213629 |
| 5.47292232  | 2.23055553  | 2.34193015 |
| 0.48302215  | 2.23055553  | 2.34193015 |
| 6.73540354  | 9.72874641  | 2.00704742 |
| 1.74550355  | 9.72874641  | 2.00704742 |
| 7.98876715  | 3.77819967  | 1.47019899 |

|             |             |            |
|-------------|-------------|------------|
| 2.99886727  | 3.77819967  | 1.47019899 |
| 9.21347809  | 11.29064846 | 1.28800344 |
| 4.22357798  | 11.29064846 | 1.28800344 |
| 5.52626467  | 6.13002825  | 0.45987183 |
| 0.53636485  | 6.13002825  | 0.45987183 |
| 7.45328903  | 1.12937152  | 0.40848067 |
| 2.46338916  | 1.12937152  | 0.40848067 |
| 4.75647831  | 8.73880577  | 0.18583304 |
| -0.23342146 | 8.73880577  | 0.18583304 |
| 1.08078490  | 11.11416860 | 9.56114055 |
| 4.74450400  | 2.47717608  | 9.39885371 |
| 9.73413776  | 2.43798931  | 9.39588021 |
| 2.04659179  | 6.88482442  | 9.77303357 |
| 2.51314960  | 10.30666301 | 7.17968756 |
| 0.05087554  | 10.91929847 | 6.81142041 |
| 3.17312851  | 7.75720470  | 7.18657102 |
| 8.18347917  | 7.72677866  | 7.21960865 |
| 0.69457613  | 12.42544568 | 4.88674139 |
| 7.53803032  | 0.02114541  | 7.05152571 |
| 3.86571472  | 5.17701948  | 7.01824338 |
| 8.88077995  | 5.15827525  | 6.95486384 |
| 3.20833855  | 2.72214586  | 6.91354980 |
| 8.19929155  | 2.71301220  | 6.91585173 |
| 0.57801250  | 8.51077784  | 6.94470346 |
| 5.63956105  | 8.35023890  | 6.88348868 |
| 4.99611700  | 10.89266144 | 6.90285009 |
| 7.53013133  | 10.16534767 | 7.04403426 |
| 1.36786695  | 5.90211219  | 6.75019929 |
| 6.39584541  | 5.88106356  | 6.65915950 |
| 0.69376092  | 3.25772115  | 6.72924307 |
| 5.68962215  | 3.27489038  | 6.73187190 |
| 0.00826118  | 0.85226242  | 6.69325147 |
| 5.01300978  | 0.88794357  | 6.69854321 |
| 3.24467733  | 11.75148870 | 5.17842940 |
| 8.22907131  | 11.73913766 | 5.17019337 |
| 8.87029238  | 9.18827393  | 5.02663535 |
| 3.85468863  | 9.22389344  | 5.14703679 |
| 7.51320499  | 4.21905175  | 5.01856469 |
| 2.51797788  | 4.23574518  | 5.03925989 |
| 8.17785867  | 6.77103660  | 4.94858179 |
| 3.19030434  | 6.77721823  | 4.93011185 |
| 5.67330513  | 12.41293443 | 4.89667581 |
| 2.53353212  | 0.07741676  | 7.05429015 |
| 3.24201440  | 1.47098148  | 4.84239727 |



|             |             |            |
|-------------|-------------|------------|
| 8.22597825  | 1.46016725  | 4.84651206 |
| 1.40270079  | 9.87533419  | 4.76587269 |
| 6.37985971  | 9.87144960  | 4.75824818 |
| 4.99826815  | 4.86768309  | 4.72622841 |
| 0.02345917  | 4.85008981  | 4.71421126 |
| 0.70624495  | 7.29039828  | 4.73764976 |
| 5.71197709  | 7.33613465  | 4.69338088 |
| 5.75452281  | 2.18421776  | 4.51906218 |
| 0.75945212  | 2.18628416  | 4.50906625 |
| 8.92724419  | 3.16928101  | 3.13275409 |
| 3.93734455  | 3.16928101  | 3.13275409 |
| 9.65447807  | 0.51179242  | 2.92767382 |
| 4.66457796  | 0.51179242  | 2.92767382 |
| 8.19081593  | 10.75315189 | 2.92137337 |
| 3.20091629  | 10.75315189 | 2.92137337 |
| 7.52427816  | 8.16568470  | 2.89047265 |
| 2.53437829  | 8.16568470  | 2.89047265 |
| 6.46140337  | 3.88992119  | 2.81003308 |
| 1.47150326  | 3.88992119  | 2.81003308 |
| 8.23615360  | 5.59719324  | 2.75910425 |
| 3.24625349  | 5.59719324  | 2.75910425 |
| 5.72548342  | 11.29866314 | 2.69921899 |
| 0.73558354  | 11.29866314 | 2.69921899 |
| 5.02271366  | 8.84247589  | 2.64073300 |
| 0.03281343  | 8.84247589  | 2.64073300 |
| 7.16234589  | 1.15467191  | 2.58495903 |
| 2.17244577  | 1.15467191  | 2.58495903 |
| 5.69094276  | 6.28061676  | 2.47308970 |
| 0.70104283  | 6.28061676  | 2.47308970 |
| 4.72644854  | 4.52631235  | 0.98044425 |
| -0.26345146 | 4.52631235  | 0.98044425 |
| 8.98416233  | 2.08401227  | 0.94984233 |
| 3.99426270  | 2.08401227  | 0.94984233 |
| 7.49692297  | 12.16127491 | 0.88189071 |
| 2.50702286  | 12.16127491 | 0.88189071 |
| 8.92881203  | 7.14167833  | 0.77916235 |
| 3.93891239  | 7.14167833  | 0.77916235 |
| 8.23179626  | 9.65808487  | 0.74752367 |
| 3.24189639  | 9.65808487  | 0.74752367 |
| 6.50168800  | 2.71004343  | 0.73384589 |
| 1.51178777  | 2.71004343  | 0.73384589 |
| 5.78449345  | 0.24636792  | 0.66762453 |
| 0.79459333  | 0.24636792  | 0.66762453 |
| 6.40908241  | 7.83185196  | 0.60482943 |

|            |             |            |
|------------|-------------|------------|
| 1.41918242 | 7.83185196  | 0.60482943 |
| 7.18588972 | 5.31081581  | 0.60368013 |
| 2.19598985 | 5.31081581  | 0.60368013 |
| 5.68450737 | 10.28863907 | 0.50651002 |
| 0.69460732 | 10.28863907 | 0.50651002 |

# TS for CO+C<sub>Cv</sub>->CCO<sub>Cv</sub>

1.000000000000

|             |             |             |    |
|-------------|-------------|-------------|----|
| 9.97980000  | 0.00000000  | 0.00000000  |    |
| -0.76395804 | 12.66177393 | 0.00000000  |    |
| 0.00000004  | 0.00000004  | 19.64040000 |    |
| H           | C           | O           | Fe |
| 1           | 40          | 4           | 80 |

Cart

|             |             |            |
|-------------|-------------|------------|
| 6.24098425  | 11.30620884 | 7.99107812 |
| 4.19113686  | 9.29768179  | 7.38262178 |
| 3.12752828  | 3.51116882  | 8.58029183 |
| 9.57290575  | 2.52656523  | 8.22891287 |
| 1.76274329  | 7.62758154  | 8.42683944 |
| 6.77287570  | 7.58666641  | 8.41966198 |
| 9.19895795  | 9.31060002  | 7.37430894 |
| 2.19865976  | 4.24608550  | 7.49715599 |
| 7.19866666  | 4.27268626  | 7.20898144 |
| 3.40895792  | 11.93893224 | 7.21001388 |
| 8.44534835  | 11.96084606 | 7.16736833 |
| -0.32576587 | 6.77316585  | 6.31930916 |
| 4.65277885  | 6.77242672  | 6.31558468 |
| 1.72872674  | 1.63224043  | 6.12150618 |
| 6.71984208  | 1.60249591  | 6.21348923 |
| 2.17028961  | 8.29376587  | 5.59305138 |
| 7.16420506  | 8.28836753  | 5.59267182 |
| 9.19490894  | 3.13601160  | 5.31189019 |
| 4.21184069  | 3.14059022  | 5.30386766 |
| 4.66987241  | 10.81129096 | 4.26561236 |
| -0.31699618 | 10.82311525 | 4.27369765 |
| 6.72619090  | 5.69671369  | 4.01393426 |
| 1.73198472  | 5.68698061  | 4.01178299 |
| 7.17703742  | 12.34847175 | 3.63833013 |
| 2.19324347  | 12.34831349 | 3.64011149 |
| 9.23220341  | 7.20115329  | 3.34410678 |
| 4.23800064  | 7.20101228  | 3.34237416 |
| 5.47292232  | 2.23055553  | 2.34193015 |
| 0.48302215  | 2.23055553  | 2.34193015 |

|             |             |            |
|-------------|-------------|------------|
| 6.73540354  | 9.72874641  | 2.00704742 |
| 1.74550355  | 9.72874641  | 2.00704742 |
| 7.98876715  | 3.77819967  | 1.47019899 |
| 2.99886727  | 3.77819967  | 1.47019899 |
| 9.21347809  | 11.29064846 | 1.28800344 |
| 4.22357798  | 11.29064846 | 1.28800344 |
| 5.52626467  | 6.13002825  | 0.45987183 |
| 0.53636485  | 6.13002825  | 0.45987183 |
| 7.45328903  | 1.12937152  | 0.40848067 |
| 2.46338916  | 1.12937152  | 0.40848067 |
| 4.75647831  | 8.73880577  | 0.18583304 |
| -0.23342146 | 8.73880577  | 0.18583304 |
| 6.60059357  | 7.34385323  | 9.57323247 |
| 3.31557659  | 3.64875289  | 9.75075959 |
| 9.76978410  | 2.34361909  | 9.39325012 |
| 1.63948519  | 7.38246120  | 9.58533187 |
| 2.52472823  | 10.25458352 | 7.10992036 |
| 0.02835418  | 10.92955756 | 6.84215681 |
| 3.18412556  | 7.79008062  | 7.13110940 |
| 8.17332389  | 7.80404955  | 7.13371249 |
| 0.68423593  | 12.44341239 | 4.88960761 |
| 7.50556630  | 0.07440232  | 7.08136799 |
| 3.86602608  | 5.16513852  | 6.95977554 |
| 8.86995932  | 5.16559023  | 6.98541935 |
| 3.18267871  | 2.71116193  | 6.90563020 |
| 8.18381862  | 2.72101362  | 6.93495388 |
| 0.71904124  | 8.32397721  | 6.94715672 |
| 5.70348900  | 8.32223492  | 6.94700679 |
| 4.98204389  | 10.92749831 | 6.93237045 |
| 7.53442094  | 10.28952334 | 7.18964394 |
| 1.37627898  | 5.86408875  | 6.82800351 |
| 6.36967207  | 5.89331623  | 6.76973980 |
| 0.68720176  | 3.30196870  | 6.76703716 |
| 5.69867910  | 3.30273749  | 6.68256027 |
| 0.00715059  | 0.90385352  | 6.69525413 |
| 4.96829650  | 0.87879870  | 6.65456862 |
| 3.23890750  | 11.76230806 | 5.18542594 |
| 8.22861026  | 11.77597111 | 5.17536965 |
| 8.88037404  | 9.23786272  | 5.08907467 |
| 3.89697136  | 9.23268476  | 5.08652025 |
| 7.51349610  | 4.22520007  | 5.04342021 |
| 2.51623602  | 4.21229528  | 5.04838275 |
| 8.19822515  | 6.75450243  | 4.92468321 |
| 3.19901979  | 6.74823526  | 4.92272507 |

|             |             |            |
|-------------|-------------|------------|
| 5.66882879  | 12.41962641 | 4.90009400 |
| 2.52502838  | 0.12215791  | 7.04744863 |
| 3.24185977  | 1.48450014  | 4.82705385 |
| 8.20741102  | 1.47976569  | 4.84908529 |
| 1.40035368  | 9.89328349  | 4.80426055 |
| 6.39627722  | 9.90246264  | 4.83840734 |
| 5.01302612  | 4.85271841  | 4.70007686 |
| 0.03342551  | 4.84683742  | 4.74336406 |
| 0.72541825  | 7.27379926  | 4.71487461 |
| 5.71289616  | 7.28909013  | 4.70694653 |
| 5.75899162  | 2.19345433  | 4.51377783 |
| 0.74994269  | 2.20719434  | 4.51647610 |
| 8.92724419  | 3.16928101  | 3.13275409 |
| 3.93734455  | 3.16928101  | 3.13275409 |
| 9.65447807  | 0.51179242  | 2.92767382 |
| 4.66457796  | 0.51179242  | 2.92767382 |
| 8.19081593  | 10.75315189 | 2.92137337 |
| 3.20091629  | 10.75315189 | 2.92137337 |
| 7.52427816  | 8.16568470  | 2.89047265 |
| 2.53437829  | 8.16568470  | 2.89047265 |
| 6.46140337  | 3.88992119  | 2.81003308 |
| 1.47150326  | 3.88992119  | 2.81003308 |
| 8.23615360  | 5.59719324  | 2.75910425 |
| 3.24625349  | 5.59719324  | 2.75910425 |
| 5.72548342  | 11.29866314 | 2.69921899 |
| 0.73558354  | 11.29866314 | 2.69921899 |
| 5.02271366  | 8.84247589  | 2.64073300 |
| 0.03281343  | 8.84247589  | 2.64073300 |
| 7.16234589  | 1.15467191  | 2.58495903 |
| 2.17244577  | 1.15467191  | 2.58495903 |
| 5.69094276  | 6.28061676  | 2.47308970 |
| 0.70104283  | 6.28061676  | 2.47308970 |
| 4.72644854  | 4.52631235  | 0.98044425 |
| -0.26345146 | 4.52631235  | 0.98044425 |
| 8.98416233  | 2.08401227  | 0.94984233 |
| 3.99426270  | 2.08401227  | 0.94984233 |
| 7.49692297  | 12.16127491 | 0.88189071 |
| 2.50702286  | 12.16127491 | 0.88189071 |
| 8.92881203  | 7.14167833  | 0.77916235 |
| 3.93891239  | 7.14167833  | 0.77916235 |
| 8.23179626  | 9.65808487  | 0.74752367 |
| 3.24189639  | 9.65808487  | 0.74752367 |
| 6.50168800  | 2.71004343  | 0.73384589 |
| 1.51178777  | 2.71004343  | 0.73384589 |

|            |             |            |
|------------|-------------|------------|
| 5.78449345 | 0.24636792  | 0.66762453 |
| 0.79459333 | 0.24636792  | 0.66762453 |
| 6.40908241 | 7.83185196  | 0.60482943 |
| 1.41918242 | 7.83185196  | 0.60482943 |
| 7.18588972 | 5.31081581  | 0.60368013 |
| 2.19598985 | 5.31081581  | 0.60368013 |
| 5.68450737 | 10.28863907 | 0.50651002 |
| 0.69460732 | 10.28863907 | 0.50651002 |

# TS for CO+CH->CHCO

1.000000000000

|             |             |             |
|-------------|-------------|-------------|
| 9.97980000  | 0.00000000  | 0.00000000  |
| -0.76395804 | 12.66177393 | 0.00000000  |
| 0.00000004  | 0.00000004  | 19.64040000 |

| H | C  | O | Fe |
|---|----|---|----|
| 2 | 41 | 4 | 80 |

Cart

|             |             |            |
|-------------|-------------|------------|
| 6.76405994  | 6.69090617  | 9.30656610 |
| 1.23892426  | 11.33112155 | 7.98381390 |
| 6.84402839  | 7.16355663  | 8.32065684 |
| 4.61805974  | 2.64140276  | 8.22433820 |
| 9.58451806  | 2.64125244  | 8.23322289 |
| 4.16452305  | 9.31765411  | 7.25139959 |
| 1.80755840  | 7.64251974  | 8.42735677 |
| 6.38639971  | 8.76704771  | 8.73336540 |
| 9.21100495  | 9.30038030  | 7.37063021 |
| 2.19847666  | 4.25657108  | 7.20464361 |
| 7.16461707  | 4.29349870  | 7.17479075 |
| 3.45096242  | 11.97195745 | 7.17306176 |
| 8.38742475  | 11.93272403 | 7.20833642 |
| -0.31544830 | 6.76784909  | 6.29664081 |
| 4.65173759  | 6.72623360  | 6.28432951 |
| 1.73185436  | 1.61760699  | 6.18059039 |
| 6.72583915  | 1.65529201  | 6.15392605 |
| 2.17516312  | 8.27783923  | 5.56873526 |
| 7.17166803  | 8.29748031  | 5.60980984 |
| 9.19530692  | 3.14437837  | 5.30256579 |
| 4.20333924  | 3.14296520  | 5.29455455 |
| 4.67301415  | 10.82550804 | 4.27945363 |
| -0.31914069 | 10.81240211 | 4.26259455 |
| 6.72166811  | 5.70290210  | 4.01829054 |
| 1.73207652  | 5.69035260  | 4.01071750 |
| 7.18533580  | 12.35081131 | 3.63572849 |

|             |             |            |
|-------------|-------------|------------|
| 2.18317418  | 12.34967742 | 3.63526816 |
| 9.22435957  | 7.20325181  | 3.33418424 |
| 4.23792750  | 7.20550666  | 3.33299324 |
| 5.47292232  | 2.23055553  | 2.34193015 |
| 0.48302215  | 2.23055553  | 2.34193015 |
| 6.73540354  | 9.72874641  | 2.00704742 |
| 1.74550355  | 9.72874641  | 2.00704742 |
| 7.98876715  | 3.77819967  | 1.47019899 |
| 2.99886727  | 3.77819967  | 1.47019899 |
| 9.21347809  | 11.29064846 | 1.28800344 |
| 4.22357798  | 11.29064846 | 1.28800344 |
| 5.52626467  | 6.13002825  | 0.45987183 |
| 0.53636485  | 6.13002825  | 0.45987183 |
| 7.45328903  | 1.12937152  | 0.40848067 |
| 2.46338916  | 1.12937152  | 0.40848067 |
| 4.75647831  | 8.73880577  | 0.18583304 |
| -0.23342146 | 8.73880577  | 0.18583304 |
| 6.47862156  | 9.28229482  | 9.80420367 |
| 4.76326773  | 2.48595677  | 9.40099291 |
| 9.71733876  | 2.48477787  | 9.41093662 |
| 1.65251299  | 7.42969116  | 9.58934076 |
| 2.53306973  | 10.30734501 | 7.18448015 |
| -0.00970460 | 10.94287620 | 6.92304224 |
| 3.18965328  | 7.78307863  | 7.10675203 |
| 8.22637749  | 7.76262007  | 7.14289592 |
| 0.67298005  | 12.42371306 | 4.90076304 |
| 7.50332776  | 0.10547353  | 7.01825183 |
| 3.86749763  | 5.16942477  | 7.01716234 |
| 8.86346377  | 5.18612304  | 7.00972820 |
| 3.20885876  | 2.72392588  | 6.92284412 |
| 8.19342214  | 2.74822461  | 6.92267325 |
| 0.73302087  | 8.32237371  | 6.94178748 |
| 5.75942875  | 8.35182003  | 7.08918201 |
| 5.00087082  | 10.94629051 | 6.79732465 |
| 7.52659921  | 10.24029717 | 7.11079893 |
| 1.38820551  | 5.88774691  | 6.77569040 |
| 6.39947803  | 5.96597390  | 6.83644029 |
| 0.69474781  | 3.27497141  | 6.74291488 |
| 5.68061750  | 3.29343833  | 6.72726431 |
| -0.00395582 | 0.88140575  | 6.71282065 |
| 5.00602574  | 0.90647514  | 6.68632023 |
| 3.23192764  | 11.78425599 | 5.17073526 |
| 8.22696310  | 11.76419641 | 5.18836386 |
| 8.89187236  | 9.23630887  | 5.09575890 |

|             |             |            |
|-------------|-------------|------------|
| 3.89945107  | 9.23705683  | 5.09882485 |
| 7.50322348  | 4.24011510  | 5.04162203 |
| 2.51694007  | 4.22846463  | 5.04191688 |
| 8.18396344  | 6.77188960  | 4.91922944 |
| 3.20550333  | 6.75460755  | 4.90714451 |
| 5.67223137  | 12.44764484 | 4.87276324 |
| 2.51771997  | 0.09326991  | 7.07241976 |
| 3.22251637  | 1.47962384  | 4.84232267 |
| 8.22324453  | 1.48884358  | 4.84012924 |
| 1.40753709  | 9.90669768  | 4.84568281 |
| 6.39422775  | 9.89262945  | 4.80957895 |
| 5.01122076  | 4.86746477  | 4.73732397 |
| 0.02277703  | 4.85602894  | 4.73984090 |
| 0.72107045  | 7.29161024  | 4.69594462 |
| 5.71474492  | 7.31606006  | 4.72822831 |
| 5.74387897  | 2.20180050  | 4.50729527 |
| 0.75710659  | 2.19166893  | 4.51836642 |
| 8.92724419  | 3.16928101  | 3.13275409 |
| 3.93734455  | 3.16928101  | 3.13275409 |
| 9.65447807  | 0.51179242  | 2.92767382 |
| 4.66457796  | 0.51179242  | 2.92767382 |
| 8.19081593  | 10.75315189 | 2.92137337 |
| 3.20091629  | 10.75315189 | 2.92137337 |
| 7.52427816  | 8.16568470  | 2.89047265 |
| 2.53437829  | 8.16568470  | 2.89047265 |
| 6.46140337  | 3.88992119  | 2.81003308 |
| 1.47150326  | 3.88992119  | 2.81003308 |
| 8.23615360  | 5.59719324  | 2.75910425 |
| 3.24625349  | 5.59719324  | 2.75910425 |
| 5.72548342  | 11.29866314 | 2.69921899 |
| 0.73558354  | 11.29866314 | 2.69921899 |
| 5.02271366  | 8.84247589  | 2.64073300 |
| 0.03281343  | 8.84247589  | 2.64073300 |
| 7.16234589  | 1.15467191  | 2.58495903 |
| 2.17244577  | 1.15467191  | 2.58495903 |
| 5.69094276  | 6.28061676  | 2.47308970 |
| 0.70104283  | 6.28061676  | 2.47308970 |
| 4.72644854  | 4.52631235  | 0.98044425 |
| -0.26345146 | 4.52631235  | 0.98044425 |
| 8.98416233  | 2.08401227  | 0.94984233 |
| 3.99426270  | 2.08401227  | 0.94984233 |
| 7.49692297  | 12.16127491 | 0.88189071 |
| 2.50702286  | 12.16127491 | 0.88189071 |
| 8.92881203  | 7.14167833  | 0.77916235 |

|            |             |            |
|------------|-------------|------------|
| 3.93891239 | 7.14167833  | 0.77916235 |
| 8.23179626 | 9.65808487  | 0.74752367 |
| 3.24189639 | 9.65808487  | 0.74752367 |
| 6.50168800 | 2.71004343  | 0.73384589 |
| 1.51178777 | 2.71004343  | 0.73384589 |
| 5.78449345 | 0.24636792  | 0.66762453 |
| 0.79459333 | 0.24636792  | 0.66762453 |
| 6.40908241 | 7.83185196  | 0.60482943 |
| 1.41918242 | 7.83185196  | 0.60482943 |
| 7.18588972 | 5.31081581  | 0.60368013 |
| 2.19598985 | 5.31081581  | 0.60368013 |
| 5.68450737 | 10.28863907 | 0.50651002 |
| 0.69460732 | 10.28863907 | 0.50651002 |

# TS for CO+CH<sub>2</sub>->CH<sub>2</sub>CO

1.000000000000

|             |             |             |    |
|-------------|-------------|-------------|----|
| 9.97980000  | 0.00000000  | 0.00000000  |    |
| -0.76395804 | 12.66177393 | 0.00000000  |    |
| 0.00000004  | 0.00000004  | 19.64040000 |    |
| H           | C           | O           | Fe |
| 3           | 41          | 4           | 80 |

Cart

|             |             |            |
|-------------|-------------|------------|
| 5.94507994  | 8.43163804  | 9.01748138 |
| 7.71328014  | 8.22125795  | 9.27015075 |
| 1.24604075  | 11.34918055 | 7.98855153 |
| 6.94892549  | 8.69796269  | 8.62353250 |
| 4.60851159  | 2.59893903  | 8.22178701 |
| 9.58038583  | 2.55463224  | 8.22798871 |
| 4.17187501  | 9.33432156  | 7.28111349 |
| 1.79408908  | 7.69567327  | 8.43180620 |
| 6.92520687  | 10.38283574 | 9.08688402 |
| 9.21528395  | 9.34026885  | 7.29056107 |
| 2.19581631  | 4.26603437  | 7.20861464 |
| 7.18563637  | 4.27007820  | 7.21187921 |
| 3.46175757  | 11.98234627 | 7.18495758 |
| 8.40851935  | 11.93451267 | 7.21044243 |
| -0.33473154 | 6.79239173  | 6.31468490 |
| 4.66586805  | 6.77609307  | 6.33116839 |
| 1.73446981  | 1.62100415  | 6.17855529 |
| 6.72738869  | 1.63500037  | 6.15665348 |
| 2.17198777  | 8.27981623  | 5.56073213 |
| 7.15846574  | 8.27023116  | 5.51758422 |
| 9.19892441  | 3.13312890  | 5.30805654 |



|             |             |             |
|-------------|-------------|-------------|
| 4.20585895  | 3.13427960  | 5.30026187  |
| 4.66842609  | 10.81119095 | 4.26351019  |
| -0.32613717 | 10.81323011 | 4.26909443  |
| 6.72010616  | 5.68513118  | 4.01459974  |
| 1.73138881  | 5.68900416  | 4.01149706  |
| 7.18758088  | 12.34572295 | 3.64940029  |
| 2.18335332  | 12.34937711 | 3.64164070  |
| 9.23002108  | 7.19815520  | 3.32774168  |
| 4.23825074  | 7.20153104  | 3.33698212  |
| 5.47292232  | 2.23055553  | 2.34193015  |
| 0.48302215  | 2.23055553  | 2.34193015  |
| 6.73540354  | 9.72874641  | 2.00704742  |
| 1.74550355  | 9.72874641  | 2.00704742  |
| 7.98876715  | 3.77819967  | 1.47019899  |
| 2.99886727  | 3.77819967  | 1.47019899  |
| 9.21347809  | 11.29064846 | 1.28800344  |
| 4.22357798  | 11.29064846 | 1.28800344  |
| 5.52626467  | 6.13002825  | 0.45987183  |
| 0.53636485  | 6.13002825  | 0.45987183  |
| 7.45328903  | 1.12937152  | 0.40848067  |
| 2.46338916  | 1.12937152  | 0.40848067  |
| 4.75647831  | 8.73880577  | 0.18583304  |
| -0.23342146 | 8.73880577  | 0.18583304  |
| 6.55778701  | 10.81953029 | 10.12701423 |
| 4.75687285  | 2.43251954  | 9.39661335  |
| 9.74064206  | 2.38795293  | 9.39997910  |
| 1.62979091  | 7.52673409  | 9.60178870  |
| 2.54043169  | 10.32102308 | 7.18677010  |
| 0.02070836  | 10.96511946 | 6.89869076  |
| 3.17998444  | 7.80789862  | 7.11767084  |
| 8.13824644  | 7.84516544  | 7.10348009  |
| 0.66569893  | 12.42020252 | 4.89870965  |
| 7.52015762  | 0.11316345  | 7.04161896  |
| 3.86676940  | 5.17807013  | 6.98654757  |
| 8.84475176  | 5.19694871  | 6.98799089  |
| 3.20852866  | 2.73107244  | 6.92405449  |
| 8.20087958  | 2.73269369  | 6.92579866  |
| 0.72655424  | 8.32942692  | 6.92787604  |
| 5.72114699  | 8.36390302  | 6.89482454  |
| 5.02193957  | 10.96180856 | 6.85720209  |
| 7.52081826  | 10.27097287 | 7.41806945  |
| 1.37655166  | 5.89599011  | 6.77536410  |
| 6.38753294  | 5.88857470  | 6.70568707  |
| 0.69885871  | 3.27171109  | 6.74687699  |

|            |             |            |
|------------|-------------|------------|
| 5.68804959 | 3.28592940  | 6.73816307 |
| 0.00923388 | 0.88276046  | 6.72489818 |
| 5.00032091 | 0.91552238  | 6.68570851 |
| 3.23777840 | 11.77550721 | 5.17992733 |
| 8.19783984 | 11.71937643 | 5.22289084 |
| 8.89401142 | 9.24756787  | 5.13052171 |
| 3.89083883 | 9.24329714  | 5.11340739 |
| 7.51274605 | 4.21531292  | 5.03036393 |
| 2.51421216 | 4.22458820  | 5.04070452 |
| 8.19974120 | 6.75304739  | 4.92183247 |
| 3.20612467 | 6.74735943  | 4.92240045 |
| 5.66897592 | 12.43015295 | 4.88715109 |
| 2.53112148 | 0.10532930  | 7.07352675 |
| 3.22328949 | 1.47529422  | 4.84484502 |
| 8.22892218 | 1.46960254  | 4.84289182 |
| 1.40510959 | 9.90984902  | 4.83570740 |
| 6.38709738 | 9.91819780  | 4.84503640 |
| 5.00729674 | 4.84180878  | 4.71772780 |
| 0.02349691 | 4.84375397  | 4.73257571 |
| 0.72192217 | 7.27933338  | 4.70142587 |
| 5.69641687 | 7.27208047  | 4.70290278 |
| 5.74856793 | 2.19624059  | 4.50984303 |
| 0.75923086 | 2.19162457  | 4.51860815 |
| 8.92724419 | 3.16928101  | 3.13275409 |
| 3.93734455 | 3.16928101  | 3.13275409 |
| 9.65447807 | 0.51179242  | 2.92767382 |
| 4.66457796 | 0.51179242  | 2.92767382 |
| 8.19081593 | 10.75315189 | 2.92137337 |
| 3.20091629 | 10.75315189 | 2.92137337 |
| 7.52427816 | 8.16568470  | 2.89047265 |
| 2.53437829 | 8.16568470  | 2.89047265 |
| 6.46140337 | 3.88992119  | 2.81003308 |
| 1.47150326 | 3.88992119  | 2.81003308 |
| 8.23615360 | 5.59719324  | 2.75910425 |
| 3.24625349 | 5.59719324  | 2.75910425 |
| 5.72548342 | 11.29866314 | 2.69921899 |
| 0.73558354 | 11.29866314 | 2.69921899 |
| 5.02271366 | 8.84247589  | 2.64073300 |
| 0.03281343 | 8.84247589  | 2.64073300 |
| 7.16234589 | 1.15467191  | 2.58495903 |
| 2.17244577 | 1.15467191  | 2.58495903 |
| 5.69094276 | 6.28061676  | 2.47308970 |
| 0.70104283 | 6.28061676  | 2.47308970 |
| 4.72644854 | 4.52631235  | 0.98044425 |

|             |             |            |
|-------------|-------------|------------|
| -0.26345146 | 4.52631235  | 0.98044425 |
| 8.98416233  | 2.08401227  | 0.94984233 |
| 3.99426270  | 2.08401227  | 0.94984233 |
| 7.49692297  | 12.16127491 | 0.88189071 |
| 2.50702286  | 12.16127491 | 0.88189071 |
| 8.92881203  | 7.14167833  | 0.77916235 |
| 3.93891239  | 7.14167833  | 0.77916235 |
| 8.23179626  | 9.65808487  | 0.74752367 |
| 3.24189639  | 9.65808487  | 0.74752367 |
| 6.50168800  | 2.71004343  | 0.73384589 |
| 1.51178777  | 2.71004343  | 0.73384589 |
| 5.78449345  | 0.24636792  | 0.66762453 |
| 0.79459333  | 0.24636792  | 0.66762453 |
| 6.40908241  | 7.83185196  | 0.60482943 |
| 1.41918242  | 7.83185196  | 0.60482943 |
| 7.18588972  | 5.31081581  | 0.60368013 |
| 2.19598985  | 5.31081581  | 0.60368013 |
| 5.68450737  | 10.28863907 | 0.50651002 |
| 0.69460732  | 10.28863907 | 0.50651002 |

# CO+CH<sub>3</sub>

1.000000000000

|             |             |             |    |
|-------------|-------------|-------------|----|
| 9.97980000  | 0.00000000  | 0.00000000  |    |
| -0.76395804 | 12.66177393 | 0.00000000  |    |
| 0.00000004  | 0.00000004  | 19.64040000 |    |
| H           | C           | O           | Fe |
| 4           | 41          | 4           | 80 |

Cart

|            |             |            |
|------------|-------------|------------|
| 2.58654742 | 1.59347832  | 9.41989477 |
| 2.46746284 | 12.60457083 | 9.69630728 |
| 6.23474279 | 11.30305530 | 7.96631051 |
| 1.44365438 | 0.21981113  | 9.53892416 |
| 2.44377670 | 0.52719001  | 9.21010589 |
| 4.68796672 | 2.92138770  | 8.25755258 |
| 9.62993793 | 2.68734692  | 8.22176072 |
| 4.18680303 | 9.29280028  | 7.39558620 |
| 1.79340284 | 7.47517689  | 8.40092999 |
| 6.78637326 | 7.51612748  | 8.40626871 |
| 9.19659391 | 9.30972172  | 7.38877535 |
| 2.19795560 | 4.26605582  | 7.17865254 |
| 7.20078398 | 4.27080828  | 7.17767685 |
| 3.38860469 | 11.92960719 | 7.16358586 |
| 8.44621811 | 11.96317716 | 7.16745422 |

|             |             |            |
|-------------|-------------|------------|
| -0.33068320 | 6.77421093  | 6.30407226 |
| 4.66324839  | 6.76850511  | 6.30974415 |
| 1.76100414  | 1.58710835  | 6.15033857 |
| 6.73918557  | 1.61995448  | 6.18490824 |
| 2.17705021  | 8.30132097  | 5.60797364 |
| 7.16506112  | 8.29304184  | 5.59765797 |
| 9.20034557  | 3.13248831  | 5.29162829 |
| 4.21438241  | 3.12605217  | 5.30008092 |
| 4.67092890  | 10.81112726 | 4.26423868 |
| -0.31408065 | 10.82270105 | 4.27124539 |
| 6.72448648  | 5.70011685  | 4.01356247 |
| 1.73505127  | 5.69711052  | 4.01573969 |
| 7.18070640  | 12.34758007 | 3.63906636 |
| 2.18807653  | 12.35234901 | 3.65184950 |
| 9.22903565  | 7.20074966  | 3.33552170 |
| 4.23875332  | 7.20411950  | 3.34077111 |
| 5.47292232  | 2.23055553  | 2.34193015 |
| 0.48302215  | 2.23055553  | 2.34193015 |
| 6.73540354  | 9.72874641  | 2.00704742 |
| 1.74550355  | 9.72874641  | 2.00704742 |
| 7.98876715  | 3.77819967  | 1.47019899 |
| 2.99886727  | 3.77819967  | 1.47019899 |
| 9.21347809  | 11.29064846 | 1.28800344 |
| 4.22357798  | 11.29064846 | 1.28800344 |
| 5.52626467  | 6.13002825  | 0.45987183 |
| 0.53636485  | 6.13002825  | 0.45987183 |
| 7.45328903  | 1.12937152  | 0.40848067 |
| 2.46338916  | 1.12937152  | 0.40848067 |
| 4.75647831  | 8.73880577  | 0.18583304 |
| -0.23342146 | 8.73880577  | 0.18583304 |
| 6.60166090  | 7.25460926  | 9.55593814 |
| 4.73882710  | 2.87220865  | 9.44788694 |
| 9.75086771  | 2.55391565  | 9.40259148 |
| 1.58672831  | 7.19996606  | 9.54321983 |
| 2.51957878  | 10.23591888 | 7.08839127 |
| 0.04057463  | 10.93284108 | 6.84008189 |
| 3.18588454  | 7.77669708  | 7.13698496 |
| 8.17577303  | 7.79941286  | 7.13365538 |
| 0.68401712  | 12.43529964 | 4.90662097 |
| 7.51121509  | 0.07855853  | 7.06497359 |
| 3.87524501  | 5.16712183  | 6.99515451 |
| 8.87015656  | 5.17187585  | 6.99284672 |
| 3.22848419  | 2.73390618  | 6.93457918 |
| 8.20939064  | 2.72858684  | 6.91723867 |

|            |             |            |
|------------|-------------|------------|
| 0.71359930 | 8.32609179  | 6.95545068 |
| 5.70110775 | 8.32086171  | 6.95604097 |
| 4.97498574 | 10.92032761 | 6.91290579 |
| 7.53915843 | 10.29101649 | 7.18771595 |
| 1.38126895 | 5.90404994  | 6.78265520 |
| 6.38283944 | 5.90862808  | 6.78039127 |
| 0.70399030 | 3.28516986  | 6.71639701 |
| 5.70138515 | 3.29302507  | 6.71640359 |
| 0.02170176 | 0.89977436  | 6.68744905 |
| 5.00681795 | 0.87257368  | 6.67457967 |
| 3.24552646 | 11.76812728 | 5.17945541 |
| 8.23410779 | 11.77533785 | 5.17533364 |
| 8.88132975 | 9.24467008  | 5.09503416 |
| 3.89960193 | 9.22450867  | 5.07042298 |
| 7.51098038 | 4.22983737  | 5.03395937 |
| 2.52275471 | 4.21949772  | 5.04213650 |
| 8.20004291 | 6.76259433  | 4.92046525 |
| 3.20752972 | 6.75673718  | 4.92087951 |
| 5.67403789 | 12.41716924 | 4.89875701 |
| 2.53310209 | 0.15481269  | 7.24088822 |
| 3.24760900 | 1.46614302  | 4.85767089 |
| 8.22202258 | 1.46779587  | 4.84544807 |
| 1.40648988 | 9.88982964  | 4.79409260 |
| 6.39714903 | 9.90341456  | 4.84297383 |
| 5.01747788 | 4.85461931  | 4.73738623 |
| 0.02683561 | 4.85595768  | 4.73267118 |
| 0.72924181 | 7.30017896  | 4.70475198 |
| 5.71728529 | 7.29275728  | 4.70594100 |
| 5.75667501 | 2.18331288  | 4.50751503 |
| 0.76519404 | 2.19090968  | 4.50645568 |
| 8.92724419 | 3.16928101  | 3.13275409 |
| 3.93734455 | 3.16928101  | 3.13275409 |
| 9.65447807 | 0.51179242  | 2.92767382 |
| 4.66457796 | 0.51179242  | 2.92767382 |
| 8.19081593 | 10.75315189 | 2.92137337 |
| 3.20091629 | 10.75315189 | 2.92137337 |
| 7.52427816 | 8.16568470  | 2.89047265 |
| 2.53437829 | 8.16568470  | 2.89047265 |
| 6.46140337 | 3.88992119  | 2.81003308 |
| 1.47150326 | 3.88992119  | 2.81003308 |
| 8.23615360 | 5.59719324  | 2.75910425 |
| 3.24625349 | 5.59719324  | 2.75910425 |
| 5.72548342 | 11.29866314 | 2.69921899 |
| 0.73558354 | 11.29866314 | 2.69921899 |

|             |             |            |
|-------------|-------------|------------|
| 5.02271366  | 8.84247589  | 2.64073300 |
| 0.03281343  | 8.84247589  | 2.64073300 |
| 7.16234589  | 1.15467191  | 2.58495903 |
| 2.17244577  | 1.15467191  | 2.58495903 |
| 5.69094276  | 6.28061676  | 2.47308970 |
| 0.70104283  | 6.28061676  | 2.47308970 |
| 4.72644854  | 4.52631235  | 0.98044425 |
| -0.26345146 | 4.52631235  | 0.98044425 |
| 8.98416233  | 2.08401227  | 0.94984233 |
| 3.99426270  | 2.08401227  | 0.94984233 |
| 7.49692297  | 12.16127491 | 0.88189071 |
| 2.50702286  | 12.16127491 | 0.88189071 |
| 8.92881203  | 7.14167833  | 0.77916235 |
| 3.93891239  | 7.14167833  | 0.77916235 |
| 8.23179626  | 9.65808487  | 0.74752367 |
| 3.24189639  | 9.65808487  | 0.74752367 |
| 6.50168800  | 2.71004343  | 0.73384589 |
| 1.51178777  | 2.71004343  | 0.73384589 |
| 5.78449345  | 0.24636792  | 0.66762453 |
| 0.79459333  | 0.24636792  | 0.66762453 |
| 6.40908241  | 7.83185196  | 0.60482943 |
| 1.41918242  | 7.83185196  | 0.60482943 |
| 7.18588972  | 5.31081581  | 0.60368013 |
| 2.19598985  | 5.31081581  | 0.60368013 |
| 5.68450737  | 10.28863907 | 0.50651002 |
| 0.69460732  | 10.28863907 | 0.50651002 |

# TS for CO+CH<sub>3</sub>->CH<sub>3</sub>CO

1.000000000000

|             |             |             |    |
|-------------|-------------|-------------|----|
| 9.97980000  | 0.00000000  | 0.00000000  |    |
| -0.76395804 | 12.66177393 | 0.00000000  |    |
| 0.00000004  | 0.00000004  | 19.64040000 |    |
| H           | C           | O           | Fe |
| 4           | 41          | 4           | 80 |

Cart

|            |             |             |
|------------|-------------|-------------|
| 2.62052863 | 2.16274747  | 10.04444046 |
| 3.70278612 | 0.79612985  | 9.55337760  |
| 6.24240900 | 11.29854182 | 7.98905289  |
| 2.11077502 | 1.08398657  | 8.76339819  |
| 3.00812169 | 1.56928318  | 9.20822647  |
| 4.27735491 | 2.70472485  | 8.61131076  |
| 9.62632429 | 2.61005409  | 8.21355544  |
| 4.20106658 | 9.27288527  | 7.40117132  |

|             |             |            |
|-------------|-------------|------------|
| 1.79000649  | 7.54878545  | 8.41882801 |
| 6.77857600  | 7.59538883  | 8.42573553 |
| 9.20525951  | 9.30072049  | 7.39021770 |
| 2.18163612  | 4.25088326  | 7.20886527 |
| 7.21763135  | 4.27240244  | 7.18423935 |
| 3.41780120  | 11.89507778 | 7.17226986 |
| 8.45170691  | 11.95004989 | 7.17621794 |
| -0.33040097 | 6.77259795  | 6.30714529 |
| 4.66225585  | 6.75160664  | 6.31134842 |
| 1.70419237  | 1.62927556  | 6.13267844 |
| 6.74714338  | 1.59861087  | 6.20562795 |
| 2.18111999  | 8.28349094  | 5.59979404 |
| 7.16603914  | 8.27703202  | 5.59243905 |
| 9.19350784  | 3.13084991  | 5.28478585 |
| 4.22214227  | 3.12191930  | 5.35808124 |
| 4.67600976  | 10.78930803 | 4.25622135 |
| -0.31283295 | 10.80999844 | 4.26628070 |
| 6.72229578  | 5.68619740  | 4.01305616 |
| 1.74025587  | 5.65378946  | 4.02497743 |
| 7.18514248  | 12.34559453 | 3.63417228 |
| 2.19728764  | 12.35133291 | 3.63605171 |
| 9.23257603  | 7.20078711  | 3.34172040 |
| 4.23887406  | 7.20307479  | 3.34646193 |
| 5.47292232  | 2.23055553  | 2.34193015 |
| 0.48302215  | 2.23055553  | 2.34193015 |
| 6.73540354  | 9.72874641  | 2.00704742 |
| 1.74550355  | 9.72874641  | 2.00704742 |
| 7.98876715  | 3.77819967  | 1.47019899 |
| 2.99886727  | 3.77819967  | 1.47019899 |
| 9.21347809  | 11.29064846 | 1.28800344 |
| 4.22357798  | 11.29064846 | 1.28800344 |
| 5.52626467  | 6.13002825  | 0.45987183 |
| 0.53636485  | 6.13002825  | 0.45987183 |
| 7.45328903  | 1.12937152  | 0.40848067 |
| 2.46338916  | 1.12937152  | 0.40848067 |
| 4.75647831  | 8.73880577  | 0.18583304 |
| -0.23342146 | 8.73880577  | 0.18583304 |
| 6.63088152  | 7.36718770  | 9.58775066 |
| 5.07340148  | 2.97870651  | 9.46573045 |
| 9.75638778  | 2.42262403  | 9.38991874 |
| 1.62599687  | 7.30569176  | 9.57566797 |
| 2.53521971  | 10.21920909 | 7.09575699 |
| 0.03744027  | 10.91959806 | 6.85641995 |
| 3.19126108  | 7.76615022  | 7.13357430 |

|            |             |            |
|------------|-------------|------------|
| 8.17777440 | 7.79824647  | 7.13310246 |
| 0.68795545 | 12.43055021 | 4.87879975 |
| 7.51269537 | 0.05686578  | 7.06754844 |
| 3.86166029 | 5.14577229  | 6.98228186 |
| 8.88167289 | 5.16994282  | 7.00101441 |
| 3.23389384 | 2.67980481  | 7.15270268 |
| 8.20084689 | 2.71894614  | 6.91874160 |
| 0.72340191 | 8.31735938  | 6.95612856 |
| 5.70866649 | 8.30632390  | 6.95171817 |
| 4.99489954 | 10.90083405 | 6.92592938 |
| 7.54377838 | 10.27852932 | 7.19887507 |
| 1.37897154 | 5.88795116  | 6.79551766 |
| 6.37570101 | 5.89088931  | 6.78102787 |
| 0.69041479 | 3.27099472  | 6.72347232 |
| 5.70225463 | 3.28267397  | 6.72566059 |
| 0.00207845 | 0.88861612  | 6.67454435 |
| 5.00430345 | 0.83700797  | 6.63104515 |
| 3.24907404 | 11.74718847 | 5.16853122 |
| 8.23321308 | 11.76023927 | 5.17736553 |
| 8.88518558 | 9.22975300  | 5.08921145 |
| 3.90661772 | 9.20775640  | 5.07725963 |
| 7.50402264 | 4.21878059  | 5.04988635 |
| 2.52406406 | 4.15277897  | 5.10744959 |
| 8.20130111 | 6.74929175  | 4.92221058 |
| 3.20181598 | 6.72826835  | 4.92213888 |
| 5.67615836 | 12.40741226 | 4.89088633 |
| 2.53384408 | 0.08243459  | 6.99444714 |
| 3.23456637 | 1.50967135  | 4.88800636 |
| 8.21651201 | 1.46510338  | 4.84297577 |
| 1.40426848 | 9.88059926  | 4.80458864 |
| 6.40092018 | 9.89191206  | 4.84616632 |
| 5.01235163 | 4.83456867  | 4.73798624 |
| 0.03515854 | 4.84479751  | 4.73854649 |
| 0.73311917 | 7.27733297  | 4.70850597 |
| 5.71640848 | 7.27269141  | 4.70801555 |
| 5.75444440 | 2.18833588  | 4.52261798 |
| 0.75130112 | 2.19205754  | 4.50101992 |
| 8.92724419 | 3.16928101  | 3.13275409 |
| 3.93734455 | 3.16928101  | 3.13275409 |
| 9.65447807 | 0.51179242  | 2.92767382 |
| 4.66457796 | 0.51179242  | 2.92767382 |
| 8.19081593 | 10.75315189 | 2.92137337 |
| 3.20091629 | 10.75315189 | 2.92137337 |
| 7.52427816 | 8.16568470  | 2.89047265 |



|             |             |            |
|-------------|-------------|------------|
| 2.53437829  | 8.16568470  | 2.89047265 |
| 6.46140337  | 3.88992119  | 2.81003308 |
| 1.47150326  | 3.88992119  | 2.81003308 |
| 8.23615360  | 5.59719324  | 2.75910425 |
| 3.24625349  | 5.59719324  | 2.75910425 |
| 5.72548342  | 11.29866314 | 2.69921899 |
| 0.73558354  | 11.29866314 | 2.69921899 |
| 5.02271366  | 8.84247589  | 2.64073300 |
| 0.03281343  | 8.84247589  | 2.64073300 |
| 7.16234589  | 1.15467191  | 2.58495903 |
| 2.17244577  | 1.15467191  | 2.58495903 |
| 5.69094276  | 6.28061676  | 2.47308970 |
| 0.70104283  | 6.28061676  | 2.47308970 |
| 4.72644854  | 4.52631235  | 0.98044425 |
| -0.26345146 | 4.52631235  | 0.98044425 |
| 8.98416233  | 2.08401227  | 0.94984233 |
| 3.99426270  | 2.08401227  | 0.94984233 |
| 7.49692297  | 12.16127491 | 0.88189071 |
| 2.50702286  | 12.16127491 | 0.88189071 |
| 8.92881203  | 7.14167833  | 0.77916235 |
| 3.93891239  | 7.14167833  | 0.77916235 |
| 8.23179626  | 9.65808487  | 0.74752367 |
| 3.24189639  | 9.65808487  | 0.74752367 |
| 6.50168800  | 2.71004343  | 0.73384589 |
| 1.51178777  | 2.71004343  | 0.73384589 |
| 5.78449345  | 0.24636792  | 0.66762453 |
| 0.79459333  | 0.24636792  | 0.66762453 |
| 6.40908241  | 7.83185196  | 0.60482943 |
| 1.41918242  | 7.83185196  | 0.60482943 |
| 7.18588972  | 5.31081581  | 0.60368013 |
| 2.19598985  | 5.31081581  | 0.60368013 |
| 5.68450737  | 10.28863907 | 0.50651002 |
| 0.69460732  | 10.28863907 | 0.50651002 |

# H+CH<sub>Cv</sub>

1.000000000000

|             |             |             |    |
|-------------|-------------|-------------|----|
| 9.97980000  | 0.00000000  | 0.00000000  |    |
| -0.76395804 | 12.66177393 | 0.00000000  |    |
| 0.00000004  | 0.00000004  | 19.64040000 |    |
| H           | C           | O           | Fe |
| 2           | 40          | 4           | 80 |

Cart

|            |            |            |
|------------|------------|------------|
| 4.28472379 | 9.44277776 | 9.03183489 |
|------------|------------|------------|

|             |             |            |
|-------------|-------------|------------|
| 6.23278268  | 11.23305456 | 7.93940917 |
| 4.22725774  | 9.27584247  | 7.94343044 |
| 4.60924062  | 2.56618334  | 8.22637446 |
| 9.61363946  | 2.64105785  | 8.23156793 |
| 1.82819438  | 7.52117173  | 8.43818228 |
| 6.72899684  | 7.74514564  | 8.46896442 |
| 9.19453644  | 9.29788937  | 7.39749165 |
| 2.21044504  | 4.25932764  | 7.19134775 |
| 7.18649081  | 4.25069284  | 7.19250339 |
| 3.40962124  | 11.87389628 | 7.16674490 |
| 8.44098784  | 11.93730566 | 7.16859108 |
| -0.33659989 | 6.77887544  | 6.32991031 |
| 4.64727677  | 6.82737578  | 6.33834219 |
| 1.73992399  | 1.61996367  | 6.16783246 |
| 6.72902005  | 1.58800991  | 6.18036851 |
| 2.19271656  | 8.33808870  | 5.66568518 |
| 7.15034705  | 8.29076522  | 5.61525937 |
| 9.20136079  | 3.13698173  | 5.30011155 |
| 4.20945396  | 3.13357012  | 5.30166680 |
| 4.67935440  | 10.82039559 | 4.28063171 |
| -0.32098777 | 10.80523868 | 4.26690482 |
| 6.72378891  | 5.69440193  | 4.02073732 |
| 1.73466031  | 5.70400098  | 4.01998340 |
| 7.18172045  | 12.34673096 | 3.63861921 |
| 2.19029874  | 12.34722201 | 3.63759055 |
| 9.23168812  | 7.19873948  | 3.35294065 |
| 4.24064981  | 7.20977254  | 3.36442075 |
| 5.47292232  | 2.23055553  | 2.34193015 |
| 0.48302215  | 2.23055553  | 2.34193015 |
| 6.73540354  | 9.72874641  | 2.00704742 |
| 1.74550355  | 9.72874641  | 2.00704742 |
| 7.98876715  | 3.77819967  | 1.47019899 |
| 2.99886727  | 3.77819967  | 1.47019899 |
| 9.21347809  | 11.29064846 | 1.28800344 |
| 4.22357798  | 11.29064846 | 1.28800344 |
| 5.52626467  | 6.13002825  | 0.45987183 |
| 0.53636485  | 6.13002825  | 0.45987183 |
| 7.45328903  | 1.12937152  | 0.40848067 |
| 2.46338916  | 1.12937152  | 0.40848067 |
| 4.75647831  | 8.73880577  | 0.18583304 |
| -0.23342146 | 8.73880577  | 0.18583304 |
| 6.64575118  | 7.52395681  | 9.63707790 |
| 4.76869861  | 2.38537399  | 9.39663293 |
| 9.73409939  | 2.49620739  | 9.41153531 |

|            |             |            |
|------------|-------------|------------|
| 1.62785046 | 7.24612635  | 9.58018414 |
| 2.56519541 | 10.17693335 | 7.05159695 |
| 0.02990785 | 10.90976424 | 6.86837824 |
| 3.21643537 | 7.82091290  | 7.17134973 |
| 8.15238835 | 7.80351530  | 7.14855879 |
| 0.67826773 | 12.42823726 | 4.88946673 |
| 7.49858456 | 0.03719680  | 7.06300240 |
| 3.88929603 | 5.16807939  | 6.96572851 |
| 8.85991380 | 5.16401010  | 6.98285273 |
| 3.21993115 | 2.71957399  | 6.92307528 |
| 8.20069119 | 2.71193959  | 6.92381169 |
| 0.72035111 | 8.31519911  | 6.97828308 |
| 5.66569127 | 8.35418470  | 6.97638405 |
| 4.96684587 | 10.82741285 | 6.86494778 |
| 7.52887809 | 10.26799618 | 7.17867304 |
| 1.38662508 | 5.89584637  | 6.78475659 |
| 6.36086631 | 5.87821261  | 6.75697946 |
| 0.70289922 | 3.27642573  | 6.73650805 |
| 5.69181286 | 3.24641530  | 6.73789860 |
| 0.01716224 | 0.88094027  | 6.70187700 |
| 4.99378081 | 0.83798371  | 6.70575181 |
| 3.24024954 | 11.75489443 | 5.17290959 |
| 8.23215577 | 11.75953776 | 5.17483930 |
| 8.88002838 | 9.23035075  | 5.10267072 |
| 3.88477746 | 9.19522254  | 4.98051691 |
| 7.50747664 | 4.21966040  | 5.04048290 |
| 2.51552092 | 4.22462934  | 5.03813325 |
| 8.18966228 | 6.75943475  | 4.93357952 |
| 3.19241188 | 6.75390455  | 4.94029527 |
| 5.67070596 | 12.42723764 | 4.89679645 |
| 2.52445402 | 0.06488695  | 7.02591587 |
| 3.23249670 | 1.47489097  | 4.84051127 |
| 8.22443983 | 1.46851334  | 4.84688112 |
| 1.39377661 | 9.88431882  | 4.77838237 |
| 6.38970958 | 9.88045451  | 4.81072151 |
| 5.01411276 | 4.84053992  | 4.71553143 |
| 0.02541542 | 4.85479352  | 4.72887368 |
| 0.72559912 | 7.30859845  | 4.72025584 |
| 5.70663507 | 7.28219521  | 4.72006338 |
| 5.75181326 | 2.18603761  | 4.51419635 |
| 0.75953524 | 2.19060289  | 4.51454485 |
| 8.92724419 | 3.16928101  | 3.13275409 |
| 3.93734455 | 3.16928101  | 3.13275409 |
| 9.65447807 | 0.51179242  | 2.92767382 |

|             |             |            |
|-------------|-------------|------------|
| 4.66457796  | 0.51179242  | 2.92767382 |
| 8.19081593  | 10.75315189 | 2.92137337 |
| 3.20091629  | 10.75315189 | 2.92137337 |
| 7.52427816  | 8.16568470  | 2.89047265 |
| 2.53437829  | 8.16568470  | 2.89047265 |
| 6.46140337  | 3.88992119  | 2.81003308 |
| 1.47150326  | 3.88992119  | 2.81003308 |
| 8.23615360  | 5.59719324  | 2.75910425 |
| 3.24625349  | 5.59719324  | 2.75910425 |
| 5.72548342  | 11.29866314 | 2.69921899 |
| 0.73558354  | 11.29866314 | 2.69921899 |
| 5.02271366  | 8.84247589  | 2.64073300 |
| 0.03281343  | 8.84247589  | 2.64073300 |
| 7.16234589  | 1.15467191  | 2.58495903 |
| 2.17244577  | 1.15467191  | 2.58495903 |
| 5.69094276  | 6.28061676  | 2.47308970 |
| 0.70104283  | 6.28061676  | 2.47308970 |
| 4.72644854  | 4.52631235  | 0.98044425 |
| -0.26345146 | 4.52631235  | 0.98044425 |
| 8.98416233  | 2.08401227  | 0.94984233 |
| 3.99426270  | 2.08401227  | 0.94984233 |
| 7.49692297  | 12.16127491 | 0.88189071 |
| 2.50702286  | 12.16127491 | 0.88189071 |
| 8.92881203  | 7.14167833  | 0.77916235 |
| 3.93891239  | 7.14167833  | 0.77916235 |
| 8.23179626  | 9.65808487  | 0.74752367 |
| 3.24189639  | 9.65808487  | 0.74752367 |
| 6.50168800  | 2.71004343  | 0.73384589 |
| 1.51178777  | 2.71004343  | 0.73384589 |
| 5.78449345  | 0.24636792  | 0.66762453 |
| 0.79459333  | 0.24636792  | 0.66762453 |
| 6.40908241  | 7.83185196  | 0.60482943 |
| 1.41918242  | 7.83185196  | 0.60482943 |
| 7.18588972  | 5.31081581  | 0.60368013 |
| 2.19598985  | 5.31081581  | 0.60368013 |
| 5.68450737  | 10.28863907 | 0.50651002 |
| 0.69460732  | 10.28863907 | 0.50651002 |

# TS for H+CH<sub>cv</sub>->CH<sub>2 cv</sub>

1.000000000000

|             |             |             |
|-------------|-------------|-------------|
| 9.97980000  | 0.00000000  | 0.00000000  |
| -0.76395804 | 12.66177393 | 0.00000000  |
| 0.00000004  | 0.00000004  | 19.64040000 |

| H | C  | O | Fe |
|---|----|---|----|
| 2 | 40 | 4 | 80 |

Cart

|             |             |            |
|-------------|-------------|------------|
| 4.15392567  | 9.25828047  | 9.14004042 |
| 5.17675882  | 10.33700085 | 8.30553514 |
| 4.31756441  | 9.31832696  | 8.04726850 |
| 4.61106301  | 2.56640798  | 8.22206999 |
| 9.60154606  | 2.61402612  | 8.22638165 |
| 1.83822511  | 7.55267422  | 8.43333894 |
| 6.73579522  | 7.69213484  | 8.46659636 |
| 9.19610368  | 9.28375128  | 7.41096759 |
| 2.20151676  | 4.26026710  | 7.19533103 |
| 7.18486479  | 4.24652987  | 7.20117634 |
| 3.43423233  | 11.86335395 | 7.16618017 |
| 8.39374902  | 11.91112770 | 7.19473439 |
| -0.31672147 | 6.76309202  | 6.32770154 |
| 4.65773247  | 6.81963868  | 6.33218057 |
| 1.73172166  | 1.60923101  | 6.18439041 |
| 6.72634111  | 1.60178350  | 6.16717484 |
| 2.20728858  | 8.34197817  | 5.67259906 |
| 7.16391274  | 8.28572078  | 5.63054181 |
| 9.19815007  | 3.13902027  | 5.30303610 |
| 4.20481355  | 3.13580449  | 5.30224792 |
| 4.68630102  | 10.82090177 | 4.29356139 |
| -0.31869309 | 10.80817228 | 4.26811422 |
| 6.72562210  | 5.69709908  | 4.01792754 |
| 1.73674250  | 5.70826507  | 4.01795218 |
| 7.18391617  | 12.34873467 | 3.64270435 |
| 2.18764060  | 12.34925200 | 3.63945976 |
| 9.23300478  | 7.20174595  | 3.35583257 |
| 4.24226386  | 7.21162469  | 3.36432432 |
| 5.47292232  | 2.23055553  | 2.34193015 |
| 0.48302215  | 2.23055553  | 2.34193015 |
| 6.73540354  | 9.72874641  | 2.00704742 |
| 1.74550355  | 9.72874641  | 2.00704742 |
| 7.98876715  | 3.77819967  | 1.47019899 |
| 2.99886727  | 3.77819967  | 1.47019899 |
| 9.21347809  | 11.29064846 | 1.28800344 |
| 4.22357798  | 11.29064846 | 1.28800344 |
| 5.52626467  | 6.13002825  | 0.45987183 |
| 0.53636485  | 6.13002825  | 0.45987183 |
| 7.45328903  | 1.12937152  | 0.40848067 |
| 2.46338916  | 1.12937152  | 0.40848067 |
| 4.75647831  | 8.73880577  | 0.18583304 |

|             |             |            |
|-------------|-------------|------------|
| -0.23342146 | 8.73880577  | 0.18583304 |
| 6.67181718  | 7.47754662  | 9.63788476 |
| 4.75274185  | 2.38364062  | 9.39494836 |
| 9.73034718  | 2.45344999  | 9.40376169 |
| 1.67473842  | 7.29201909  | 9.58603751 |
| 2.53845872  | 10.17910508 | 7.03479812 |
| 0.01012935  | 10.90744328 | 6.88650034 |
| 3.24911105  | 7.84863396  | 7.16801038 |
| 8.17498691  | 7.77925809  | 7.15271828 |
| 0.67793789  | 12.42111335 | 4.89855104 |
| 7.46714667  | 0.02584923  | 7.03466848 |
| 3.88781901  | 5.16856503  | 6.97548851 |
| 8.85810784  | 5.16023215  | 6.98837522 |
| 3.21008639  | 2.72038740  | 6.92347669 |
| 8.19709850  | 2.71148150  | 6.92003052 |
| 0.72860325  | 8.31764143  | 6.98507145 |
| 5.68546148  | 8.33337561  | 6.99107508 |
| 4.95442112  | 10.79563352 | 6.81493453 |
| 7.52047955  | 10.22162512 | 7.12034741 |
| 1.40910790  | 5.90971999  | 6.78986245 |
| 6.36597570  | 5.87921922  | 6.78099309 |
| 0.70079895  | 3.26405901  | 6.73939668 |
| 5.68557078  | 3.24825479  | 6.73952356 |
| 0.00367147  | 0.85553980  | 6.71853718 |
| 4.99656184  | 0.83576582  | 6.70998475 |
| 3.24549977  | 11.76035465 | 5.16940711 |
| 8.23084907  | 11.75487698 | 5.18455402 |
| 8.88527547  | 9.21779943  | 5.07806274 |
| 3.89226954  | 9.18552525  | 4.95635476 |
| 7.50550744  | 4.22325073  | 5.04032858 |
| 2.51411648  | 4.22825348  | 5.03838306 |
| 8.19818204  | 6.75416613  | 4.93328431 |
| 3.19565395  | 6.75727560  | 4.94476709 |
| 5.67632457  | 12.42447798 | 4.89785006 |
| 2.53339879  | 0.04953973  | 7.02545852 |
| 3.22285739  | 1.47700440  | 4.84259331 |
| 8.22148540  | 1.47310946  | 4.83931961 |
| 1.40151130  | 9.88304554  | 4.78015460 |
| 6.39296978  | 9.86857764  | 4.80558713 |
| 5.01679569  | 4.84535875  | 4.72934679 |
| 0.03121318  | 4.85886911  | 4.74355700 |
| 0.73584202  | 7.31568037  | 4.71888898 |
| 5.71687215  | 7.28393462  | 4.71940561 |
| 5.74459479  | 2.18430497  | 4.51425347 |

|             |             |            |
|-------------|-------------|------------|
| 0.75591321  | 2.18465439  | 4.52076987 |
| 8.92724419  | 3.16928101  | 3.13275409 |
| 3.93734455  | 3.16928101  | 3.13275409 |
| 9.65447807  | 0.51179242  | 2.92767382 |
| 4.66457796  | 0.51179242  | 2.92767382 |
| 8.19081593  | 10.75315189 | 2.92137337 |
| 3.20091629  | 10.75315189 | 2.92137337 |
| 7.52427816  | 8.16568470  | 2.89047265 |
| 2.53437829  | 8.16568470  | 2.89047265 |
| 6.46140337  | 3.88992119  | 2.81003308 |
| 1.47150326  | 3.88992119  | 2.81003308 |
| 8.23615360  | 5.59719324  | 2.75910425 |
| 3.24625349  | 5.59719324  | 2.75910425 |
| 5.72548342  | 11.29866314 | 2.69921899 |
| 0.73558354  | 11.29866314 | 2.69921899 |
| 5.02271366  | 8.84247589  | 2.64073300 |
| 0.03281343  | 8.84247589  | 2.64073300 |
| 7.16234589  | 1.15467191  | 2.58495903 |
| 2.17244577  | 1.15467191  | 2.58495903 |
| 5.69094276  | 6.28061676  | 2.47308970 |
| 0.70104283  | 6.28061676  | 2.47308970 |
| 4.72644854  | 4.52631235  | 0.98044425 |
| -0.26345146 | 4.52631235  | 0.98044425 |
| 8.98416233  | 2.08401227  | 0.94984233 |
| 3.99426270  | 2.08401227  | 0.94984233 |
| 7.49692297  | 12.16127491 | 0.88189071 |
| 2.50702286  | 12.16127491 | 0.88189071 |
| 8.92881203  | 7.14167833  | 0.77916235 |
| 3.93891239  | 7.14167833  | 0.77916235 |
| 8.23179626  | 9.65808487  | 0.74752367 |
| 3.24189639  | 9.65808487  | 0.74752367 |
| 6.50168800  | 2.71004343  | 0.73384589 |
| 1.51178777  | 2.71004343  | 0.73384589 |
| 5.78449345  | 0.24636792  | 0.66762453 |
| 0.79459333  | 0.24636792  | 0.66762453 |
| 6.40908241  | 7.83185196  | 0.60482943 |
| 1.41918242  | 7.83185196  | 0.60482943 |
| 7.18588972  | 5.31081581  | 0.60368013 |
| 2.19598985  | 5.31081581  | 0.60368013 |
| 5.68450737  | 10.28863907 | 0.50651002 |
| 0.69460732  | 10.28863907 | 0.50651002 |

# CH<sub>2</sub> cv

1.000000000000

|             |             |             |    |
|-------------|-------------|-------------|----|
| 9.97980000  | 0.00000000  | 0.00000000  |    |
| -0.76395804 | 12.66177393 | 0.00000000  |    |
| 0.00000004  | 0.00000004  | 19.64040000 |    |
| H           | C           | O           | Fe |
| 2           | 40          | 4           | 80 |

Cart

|             |             |            |
|-------------|-------------|------------|
| 4.00273981  | 9.43855206  | 9.15717188 |
| 5.42906466  | 9.62254259  | 8.09768918 |
| 4.14274106  | 9.25966188  | 8.07515900 |
| 4.61000578  | 2.57032363  | 8.21971034 |
| 9.59589459  | 2.60639315  | 8.22352403 |
| 1.86769630  | 7.52772742  | 8.44174997 |
| 6.77224900  | 7.57655877  | 8.46567307 |
| 9.20202153  | 9.28143471  | 7.42192079 |
| 2.19526104  | 4.25827588  | 7.19798793 |
| 7.18203747  | 4.25429086  | 7.20156278 |
| 3.41091665  | 11.87788991 | 7.16904423 |
| 8.39523606  | 11.90382161 | 7.19416628 |
| -0.31384228 | 6.75819255  | 6.32878540 |
| 4.65506158  | 6.79778785  | 6.31503357 |
| 1.72925328  | 1.61206086  | 6.18242318 |
| 6.72235126  | 1.60901162  | 6.16919959 |
| 2.21038760  | 8.34452028  | 5.67230316 |
| 7.15262207  | 8.29076097  | 5.65918068 |
| 9.19219366  | 3.14141017  | 5.29966525 |
| 4.20269958  | 3.13866731  | 5.30042277 |
| 4.68188697  | 10.82043019 | 4.27514946 |
| -0.31953762 | 10.80669503 | 4.26805396 |
| 6.72483426  | 5.70405855  | 4.01682851 |
| 1.73573051  | 5.70871750  | 4.01757735 |
| 7.18255970  | 12.34785470 | 3.64219267 |
| 2.18794084  | 12.34889245 | 3.63808047 |
| 9.23218592  | 7.20291744  | 3.36022696 |
| 4.24322625  | 7.21221389  | 3.36067209 |
| 5.47292232  | 2.23055553  | 2.34193015 |
| 0.48302215  | 2.23055553  | 2.34193015 |
| 6.73540354  | 9.72874641  | 2.00704742 |
| 1.74550355  | 9.72874641  | 2.00704742 |
| 7.98876715  | 3.77819967  | 1.47019899 |
| 2.99886727  | 3.77819967  | 1.47019899 |
| 9.21347809  | 11.29064846 | 1.28800344 |
| 4.22357798  | 11.29064846 | 1.28800344 |
| 5.52626467  | 6.13002825  | 0.45987183 |



|             |             |            |
|-------------|-------------|------------|
| 0.53636485  | 6.13002825  | 0.45987183 |
| 7.45328903  | 1.12937152  | 0.40848067 |
| 2.46338916  | 1.12937152  | 0.40848067 |
| 4.75647831  | 8.73880577  | 0.18583304 |
| -0.23342146 | 8.73880577  | 0.18583304 |
| 6.69201480  | 7.38360731  | 9.63998689 |
| 4.74843477  | 2.39164797  | 9.39430300 |
| 9.72613695  | 2.43765831  | 9.39847632 |
| 1.63805312  | 7.31976716  | 9.59300197 |
| 2.57838323  | 10.17273977 | 7.03997490 |
| 0.01301738  | 10.90426052 | 6.88294218 |
| 3.24002419  | 7.81223906  | 7.17141851 |
| 8.18461344  | 7.77474140  | 7.15869338 |
| 0.67750620  | 12.42001881 | 4.89644945 |
| 7.48395000  | 0.04212973  | 7.02991996 |
| 3.88189228  | 5.16312580  | 6.98990000 |
| 8.85859981  | 5.16027296  | 6.99598221 |
| 3.20661128  | 2.72045416  | 6.92210873 |
| 8.19290965  | 2.71584003  | 6.91837364 |
| 0.72697581  | 8.31721245  | 6.97630551 |
| 5.67165181  | 8.33141637  | 7.04620925 |
| 4.97744783  | 10.86375924 | 6.84065328 |
| 7.52221540  | 10.21365408 | 7.11910642 |
| 1.41072957  | 5.91180275  | 6.79658015 |
| 6.36552078  | 5.89660684  | 6.81512385 |
| 0.69536188  | 3.26443589  | 6.73933268 |
| 5.68328034  | 3.25537524  | 6.73914342 |
| 0.00341072  | 0.85348827  | 6.71870553 |
| 4.99942829  | 0.84142470  | 6.72096524 |
| 3.24297520  | 11.76246444 | 5.16891908 |
| 8.23106076  | 11.75442549 | 5.18339761 |
| 8.87657939  | 9.21560707  | 5.07019988 |
| 3.89068077  | 9.19408092  | 4.96814119 |
| 7.50183919  | 4.23483053  | 5.04478930 |
| 2.51285701  | 4.23129909  | 5.04011214 |
| 8.19394363  | 6.75794333  | 4.93679498 |
| 3.19571997  | 6.75838487  | 4.93533049 |
| 5.67391869  | 12.41707080 | 4.89676072 |
| 2.51925033  | 0.05312577  | 7.02380052 |
| 3.22141828  | 1.47799115  | 4.84251934 |
| 8.21762659  | 1.47079006  | 4.84177557 |
| 1.39743913  | 9.88009548  | 4.77294935 |
| 6.38448871  | 9.86417395  | 4.81236205 |
| 5.01684349  | 4.85445014  | 4.74012233 |

|             |             |            |
|-------------|-------------|------------|
| 0.02826940  | 4.86301376  | 4.74783527 |
| 0.73463817  | 7.31762849  | 4.71720995 |
| 5.71570137  | 7.29301941  | 4.73660493 |
| 5.74249708  | 2.18381606  | 4.51679331 |
| 0.75241267  | 2.18414345  | 4.52149408 |
| 8.92724419  | 3.16928101  | 3.13275409 |
| 3.93734455  | 3.16928101  | 3.13275409 |
| 9.65447807  | 0.51179242  | 2.92767382 |
| 4.66457796  | 0.51179242  | 2.92767382 |
| 8.19081593  | 10.75315189 | 2.92137337 |
| 3.20091629  | 10.75315189 | 2.92137337 |
| 7.52427816  | 8.16568470  | 2.89047265 |
| 2.53437829  | 8.16568470  | 2.89047265 |
| 6.46140337  | 3.88992119  | 2.81003308 |
| 1.47150326  | 3.88992119  | 2.81003308 |
| 8.23615360  | 5.59719324  | 2.75910425 |
| 3.24625349  | 5.59719324  | 2.75910425 |
| 5.72548342  | 11.29866314 | 2.69921899 |
| 0.73558354  | 11.29866314 | 2.69921899 |
| 5.02271366  | 8.84247589  | 2.64073300 |
| 0.03281343  | 8.84247589  | 2.64073300 |
| 7.16234589  | 1.15467191  | 2.58495903 |
| 2.17244577  | 1.15467191  | 2.58495903 |
| 5.69094276  | 6.28061676  | 2.47308970 |
| 0.70104283  | 6.28061676  | 2.47308970 |
| 4.72644854  | 4.52631235  | 0.98044425 |
| -0.26345146 | 4.52631235  | 0.98044425 |
| 8.98416233  | 2.08401227  | 0.94984233 |
| 3.99426270  | 2.08401227  | 0.94984233 |
| 7.49692297  | 12.16127491 | 0.88189071 |
| 2.50702286  | 12.16127491 | 0.88189071 |
| 8.92881203  | 7.14167833  | 0.77916235 |
| 3.93891239  | 7.14167833  | 0.77916235 |
| 8.23179626  | 9.65808487  | 0.74752367 |
| 3.24189639  | 9.65808487  | 0.74752367 |
| 6.50168800  | 2.71004343  | 0.73384589 |
| 1.51178777  | 2.71004343  | 0.73384589 |
| 5.78449345  | 0.24636792  | 0.66762453 |
| 0.79459333  | 0.24636792  | 0.66762453 |
| 6.40908241  | 7.83185196  | 0.60482943 |
| 1.41918242  | 7.83185196  | 0.60482943 |
| 7.18588972  | 5.31081581  | 0.60368013 |
| 2.19598985  | 5.31081581  | 0.60368013 |
| 5.68450737  | 10.28863907 | 0.50651002 |

0.69460732 10.28863907 0.50651002

# H+CH<sub>2</sub> cv

1.000000000000

|             |             |             |
|-------------|-------------|-------------|
| 9.97980000  | 0.00000000  | 0.00000000  |
| -0.76395804 | 12.66177393 | 0.00000000  |
| 0.00000004  | 0.00000004  | 19.64040000 |
| H C         | O Fe        |             |
| 3 40        | 4 80        |             |

Cart

|             |             |            |
|-------------|-------------|------------|
| 3.88658270  | 9.37714391  | 9.20179494 |
| 5.28766995  | 9.48120271  | 8.19989818 |
| 6.25472539  | 11.32662959 | 7.98261805 |
| 4.07803873  | 9.21885316  | 8.12595218 |
| 4.61059625  | 2.57608829  | 8.22114829 |
| 9.59802283  | 2.60447179  | 8.21719424 |
| 1.85563286  | 7.47590745  | 8.42867612 |
| 6.78338031  | 7.57141419  | 8.46855963 |
| 9.19648399  | 9.29729451  | 7.41295877 |
| 2.19712728  | 4.26210508  | 7.19774510 |
| 7.18267768  | 4.25153993  | 7.20168014 |
| 3.40342556  | 11.87757586 | 7.18377209 |
| 8.44936181  | 11.93860847 | 7.16002250 |
| -0.32437650 | 6.76506862  | 6.32859959 |
| 4.64791142  | 6.78769097  | 6.30730931 |
| 1.73987093  | 1.62148988  | 6.17288201 |
| 6.72472186  | 1.59554032  | 6.18151400 |
| 2.20510131  | 8.34494007  | 5.66946788 |
| 7.13633819  | 8.28001968  | 5.65856884 |
| 9.19311528  | 3.13953383  | 5.29323103 |
| 4.20625554  | 3.13810660  | 5.29987764 |
| 4.68077016  | 10.80965756 | 4.26462552 |
| -0.31954426 | 10.80222285 | 4.27099474 |
| 6.72367577  | 5.70402891  | 4.01626307 |
| 1.73393314  | 5.70845284  | 4.01809010 |
| 7.17937547  | 12.34753200 | 3.64086086 |
| 2.19560064  | 12.34838885 | 3.63965653 |
| 9.23114154  | 7.20165494  | 3.35899757 |
| 4.24225782  | 7.21249915  | 3.35794187 |
| 5.47292232  | 2.23055553  | 2.34193015 |
| 0.48302215  | 2.23055553  | 2.34193015 |
| 6.73540354  | 9.72874641  | 2.00704742 |
| 1.74550355  | 9.72874641  | 2.00704742 |

|             |             |            |
|-------------|-------------|------------|
| 7.98876715  | 3.77819967  | 1.47019899 |
| 2.99886727  | 3.77819967  | 1.47019899 |
| 9.21347809  | 11.29064846 | 1.28800344 |
| 4.22357798  | 11.29064846 | 1.28800344 |
| 5.52626467  | 6.13002825  | 0.45987183 |
| 0.53636485  | 6.13002825  | 0.45987183 |
| 7.45328903  | 1.12937152  | 0.40848067 |
| 2.46338916  | 1.12937152  | 0.40848067 |
| 4.75647831  | 8.73880577  | 0.18583304 |
| -0.23342146 | 8.73880577  | 0.18583304 |
| 6.68387369  | 7.38002629  | 9.64225127 |
| 4.74120804  | 2.39021245  | 9.39499541 |
| 9.72909709  | 2.43392363  | 9.39313147 |
| 1.60922028  | 7.28372546  | 9.57950867 |
| 2.59388168  | 10.16519579 | 7.04694978 |
| 0.03256008  | 10.90193596 | 6.84654157 |
| 3.22211262  | 7.79026041  | 7.16704382 |
| 8.17203228  | 7.79226816  | 7.16162602 |
| 0.68409375  | 12.42548741 | 4.88583397 |
| 7.51034186  | 0.05430768  | 7.06017417 |
| 3.88234035  | 5.15994618  | 6.99658958 |
| 8.85530620  | 5.16610043  | 7.00038549 |
| 3.21059541  | 2.72280130  | 6.91959493 |
| 8.19426760  | 2.71513895  | 6.91519695 |
| 0.71657815  | 8.31661445  | 6.97087179 |
| 5.65448015  | 8.31413133  | 7.04304128 |
| 4.98639515  | 10.87986435 | 6.91485601 |
| 7.53255363  | 10.27271565 | 7.18535062 |
| 1.39889850  | 5.91133229  | 6.80483560 |
| 6.36391670  | 5.89109210  | 6.81271890 |
| 0.69576197  | 3.27810536  | 6.73624214 |
| 5.68606407  | 3.25182756  | 6.74046442 |
| 0.01803793  | 0.88316595  | 6.69349717 |
| 4.99526358  | 0.84151159  | 6.71419060 |
| 3.24667915  | 11.74632927 | 5.18044514 |
| 8.23328481  | 11.75972841 | 5.17407513 |
| 8.86485426  | 9.22370762  | 5.09061510 |
| 3.89359054  | 9.19497888  | 4.98502269 |
| 7.50324109  | 4.23624341  | 5.04537026 |
| 2.51408909  | 4.23215049  | 5.04068672 |
| 8.19191585  | 6.76151785  | 4.93850819 |
| 3.19197603  | 6.75888887  | 4.92925170 |
| 5.67345812  | 12.40640279 | 4.90870417 |
| 2.52261448  | 0.05712673  | 7.02050307 |

|             |             |            |
|-------------|-------------|------------|
| 3.23219156  | 1.47457825  | 4.84244970 |
| 8.21669030  | 1.46649316  | 4.84322588 |
| 1.39506834  | 9.87581953  | 4.76510760 |
| 6.37950702  | 9.87371133  | 4.85671722 |
| 5.01642508  | 4.85417195  | 4.74158606 |
| 0.02508415  | 4.86460272  | 4.74447269 |
| 0.73076189  | 7.31777290  | 4.71675509 |
| 5.71107248  | 7.28757304  | 4.73649099 |
| 5.74761263  | 2.18212019  | 4.51830103 |
| 0.75642663  | 2.18945704  | 4.51737222 |
| 8.92724419  | 3.16928101  | 3.13275409 |
| 3.93734455  | 3.16928101  | 3.13275409 |
| 9.65447807  | 0.51179242  | 2.92767382 |
| 4.66457796  | 0.51179242  | 2.92767382 |
| 8.19081593  | 10.75315189 | 2.92137337 |
| 3.20091629  | 10.75315189 | 2.92137337 |
| 7.52427816  | 8.16568470  | 2.89047265 |
| 2.53437829  | 8.16568470  | 2.89047265 |
| 6.46140337  | 3.88992119  | 2.81003308 |
| 1.47150326  | 3.88992119  | 2.81003308 |
| 8.23615360  | 5.59719324  | 2.75910425 |
| 3.24625349  | 5.59719324  | 2.75910425 |
| 5.72548342  | 11.29866314 | 2.69921899 |
| 0.73558354  | 11.29866314 | 2.69921899 |
| 5.02271366  | 8.84247589  | 2.64073300 |
| 0.03281343  | 8.84247589  | 2.64073300 |
| 7.16234589  | 1.15467191  | 2.58495903 |
| 2.17244577  | 1.15467191  | 2.58495903 |
| 5.69094276  | 6.28061676  | 2.47308970 |
| 0.70104283  | 6.28061676  | 2.47308970 |
| 4.72644854  | 4.52631235  | 0.98044425 |
| -0.26345146 | 4.52631235  | 0.98044425 |
| 8.98416233  | 2.08401227  | 0.94984233 |
| 3.99426270  | 2.08401227  | 0.94984233 |
| 7.49692297  | 12.16127491 | 0.88189071 |
| 2.50702286  | 12.16127491 | 0.88189071 |
| 8.92881203  | 7.14167833  | 0.77916235 |
| 3.93891239  | 7.14167833  | 0.77916235 |
| 8.23179626  | 9.65808487  | 0.74752367 |
| 3.24189639  | 9.65808487  | 0.74752367 |
| 6.50168800  | 2.71004343  | 0.73384589 |
| 1.51178777  | 2.71004343  | 0.73384589 |
| 5.78449345  | 0.24636792  | 0.66762453 |
| 0.79459333  | 0.24636792  | 0.66762453 |

|            |             |            |
|------------|-------------|------------|
| 6.40908241 | 7.83185196  | 0.60482943 |
| 1.41918242 | 7.83185196  | 0.60482943 |
| 7.18588972 | 5.31081581  | 0.60368013 |
| 2.19598985 | 5.31081581  | 0.60368013 |
| 5.68450737 | 10.28863907 | 0.50651002 |
| 0.69460732 | 10.28863907 | 0.50651002 |

# TS for H+CH<sub>2</sub> cv->CH<sub>3</sub> cv

1.000000000000

|             |             |             |
|-------------|-------------|-------------|
| 9.97980000  | 0.00000000  | 0.00000000  |
| -0.76395804 | 12.66177393 | 0.00000000  |
| 0.00000004  | 0.00000004  | 19.64040000 |

| H | C  | O | Fe |
|---|----|---|----|
| 3 | 40 | 4 | 80 |

Cart

|             |             |            |
|-------------|-------------|------------|
| 3.96097325  | 9.62040107  | 9.19317235 |
| 5.14788866  | 8.56900265  | 8.57181407 |
| 5.29303891  | 10.45646879 | 8.31977497 |
| 4.38180675  | 9.38782070  | 8.19964209 |
| 4.60802377  | 2.57855484  | 8.22414784 |
| 9.60198807  | 2.60890479  | 8.22545421 |
| 1.86672541  | 7.79465788  | 8.47676131 |
| 7.35940055  | 7.29440936  | 8.68428199 |
| 9.18444346  | 9.28694520  | 7.36701470 |
| 2.20058178  | 4.26891152  | 7.20524032 |
| 7.18508218  | 4.24939054  | 7.18769358 |
| 3.43029839  | 11.86945288 | 7.17621842 |
| 8.38805622  | 11.91621259 | 7.19307504 |
| -0.29844306 | 6.75580227  | 6.30327318 |
| 4.65324547  | 6.82480411  | 6.34400480 |
| 1.73176225  | 1.62194440  | 6.18339303 |
| 6.72843631  | 1.60708022  | 6.16757928 |
| 2.20782881  | 8.33913855  | 5.64748128 |
| 7.14120188  | 8.27770147  | 5.64635985 |
| 9.19989577  | 3.14088193  | 5.30191691 |
| 4.20442808  | 3.13509694  | 5.30202911 |
| 4.68960135  | 10.82764811 | 4.29371501 |
| -0.32119241 | 10.79324449 | 4.26804306 |
| 6.72495972  | 5.69929682  | 4.01794439 |
| 1.73613503  | 5.70444929  | 4.01698509 |
| 7.18412902  | 12.34817500 | 3.64142027 |
| 2.18728182  | 12.35087948 | 3.64041957 |
| 9.23223866  | 7.20412831  | 3.34899056 |

|             |             |            |
|-------------|-------------|------------|
| 4.24397043  | 7.21159189  | 3.36409408 |
| 5.47292232  | 2.23055553  | 2.34193015 |
| 0.48302215  | 2.23055553  | 2.34193015 |
| 6.73540354  | 9.72874641  | 2.00704742 |
| 1.74550355  | 9.72874641  | 2.00704742 |
| 7.98876715  | 3.77819967  | 1.47019899 |
| 2.99886727  | 3.77819967  | 1.47019899 |
| 9.21347809  | 11.29064846 | 1.28800344 |
| 4.22357798  | 11.29064846 | 1.28800344 |
| 5.52626467  | 6.13002825  | 0.45987183 |
| 0.53636485  | 6.13002825  | 0.45987183 |
| 7.45328903  | 1.12937152  | 0.40848067 |
| 2.46338916  | 1.12937152  | 0.40848067 |
| 4.75647831  | 8.73880577  | 0.18583304 |
| -0.23342146 | 8.73880577  | 0.18583304 |
| 6.91671328  | 7.08591709  | 9.75492338 |
| 4.75166324  | 2.40228856  | 9.39866678 |
| 9.73015740  | 2.44032680  | 9.40235216 |
| 1.72977580  | 7.66501702  | 9.65469082 |
| 2.48573126  | 10.21133156 | 6.99974085 |
| 0.00876497  | 10.92156019 | 6.88840053 |
| 3.24528214  | 7.89211085  | 7.14958262 |
| 8.19820305  | 7.74511867  | 7.17808888 |
| 0.67680388  | 12.41886240 | 4.89715079 |
| 7.46479050  | 0.03121326  | 7.03743619 |
| 3.88982295  | 5.17549805  | 6.97699389 |
| 8.85960318  | 5.18176265  | 7.01880926 |
| 3.20981915  | 2.72903977  | 6.92492986 |
| 8.20014849  | 2.71872102  | 6.91954038 |
| 0.73832167  | 8.34083144  | 6.97104579 |
| 5.66844996  | 8.41944909  | 6.90553998 |
| 4.94711264  | 10.81265583 | 6.82282226 |
| 7.51586637  | 10.22497845 | 7.08757551 |
| 1.43441132  | 5.92282453  | 6.76922223 |
| 6.36860551  | 5.88704680  | 6.77472775 |
| 0.70264532  | 3.27009329  | 6.74324820 |
| 5.68368077  | 3.25291372  | 6.73840668 |
| 0.00529932  | 0.85991537  | 6.72134991 |
| 4.99675553  | 0.84085028  | 6.71012673 |
| 3.24792712  | 11.76620183 | 5.17034668 |
| 8.23682683  | 11.76144948 | 5.17859093 |
| 8.87652777  | 9.20748947  | 5.11931352 |
| 3.90253867  | 9.19346989  | 4.95802039 |
| 7.50943772  | 4.22871122  | 5.04287526 |

|             |             |            |
|-------------|-------------|------------|
| 2.51772601  | 4.23042704  | 5.03770490 |
| 8.20095072  | 6.75672241  | 4.92894097 |
| 3.19855489  | 6.75604210  | 4.95077190 |
| 5.67897596  | 12.42550759 | 4.90085020 |
| 2.53136230  | 0.06425771  | 7.02907821 |
| 3.22142805  | 1.47898260  | 4.84403611 |
| 8.22066305  | 1.47666461  | 4.83982333 |
| 1.40377420  | 9.88500409  | 4.76829716 |
| 6.39732177  | 9.87249535  | 4.78445801 |
| 5.01836400  | 4.84237563  | 4.72619630 |
| 0.02857801  | 4.86363855  | 4.75284373 |
| 0.73995311  | 7.31473658  | 4.71133132 |
| 5.70965433  | 7.27203621  | 4.73086913 |
| 5.74477300  | 2.18376653  | 4.51427276 |
| 0.75534298  | 2.18591677  | 4.52202663 |
| 8.92724419  | 3.16928101  | 3.13275409 |
| 3.93734455  | 3.16928101  | 3.13275409 |
| 9.65447807  | 0.51179242  | 2.92767382 |
| 4.66457796  | 0.51179242  | 2.92767382 |
| 8.19081593  | 10.75315189 | 2.92137337 |
| 3.20091629  | 10.75315189 | 2.92137337 |
| 7.52427816  | 8.16568470  | 2.89047265 |
| 2.53437829  | 8.16568470  | 2.89047265 |
| 6.46140337  | 3.88992119  | 2.81003308 |
| 1.47150326  | 3.88992119  | 2.81003308 |
| 8.23615360  | 5.59719324  | 2.75910425 |
| 3.24625349  | 5.59719324  | 2.75910425 |
| 5.72548342  | 11.29866314 | 2.69921899 |
| 0.73558354  | 11.29866314 | 2.69921899 |
| 5.02271366  | 8.84247589  | 2.64073300 |
| 0.03281343  | 8.84247589  | 2.64073300 |
| 7.16234589  | 1.15467191  | 2.58495903 |
| 2.17244577  | 1.15467191  | 2.58495903 |
| 5.69094276  | 6.28061676  | 2.47308970 |
| 0.70104283  | 6.28061676  | 2.47308970 |
| 4.72644854  | 4.52631235  | 0.98044425 |
| -0.26345146 | 4.52631235  | 0.98044425 |
| 8.98416233  | 2.08401227  | 0.94984233 |
| 3.99426270  | 2.08401227  | 0.94984233 |
| 7.49692297  | 12.16127491 | 0.88189071 |
| 2.50702286  | 12.16127491 | 0.88189071 |
| 8.92881203  | 7.14167833  | 0.77916235 |
| 3.93891239  | 7.14167833  | 0.77916235 |
| 8.23179626  | 9.65808487  | 0.74752367 |



|            |             |            |
|------------|-------------|------------|
| 3.24189639 | 9.65808487  | 0.74752367 |
| 6.50168800 | 2.71004343  | 0.73384589 |
| 1.51178777 | 2.71004343  | 0.73384589 |
| 5.78449345 | 0.24636792  | 0.66762453 |
| 0.79459333 | 0.24636792  | 0.66762453 |
| 6.40908241 | 7.83185196  | 0.60482943 |
| 1.41918242 | 7.83185196  | 0.60482943 |
| 7.18588972 | 5.31081581  | 0.60368013 |
| 2.19598985 | 5.31081581  | 0.60368013 |
| 5.68450737 | 10.28863907 | 0.50651002 |
| 0.69460732 | 10.28863907 | 0.50651002 |

# CH<sub>3</sub> cv

1.000000000000

|             |             |             |    |
|-------------|-------------|-------------|----|
| 9.97980000  | 0.00000000  | 0.00000000  |    |
| -0.76395804 | 12.66177393 | 0.00000000  |    |
| 0.00000004  | 0.00000004  | 19.64040000 |    |
| H           | C           | O           | Fe |
| 3           | 40          | 4           | 80 |

Cart

|             |             |            |
|-------------|-------------|------------|
| 3.76000046  | 8.70923077  | 8.93413324 |
| 5.50073431  | 8.73166882  | 9.28009911 |
| 4.62773437  | 10.22153669 | 8.88933235 |
| 4.75016343  | 9.15459196  | 8.59173718 |
| 4.60893925  | 2.57521191  | 8.22219636 |
| 9.60746214  | 2.64218208  | 8.22898212 |
| 1.73299882  | 7.55879834  | 8.42487694 |
| 7.49763767  | 7.09806093  | 8.66852244 |
| 9.17594385  | 9.27597397  | 7.37133987 |
| 2.21673041  | 4.26885119  | 7.19872912 |
| 7.17731491  | 4.25079599  | 7.16649345 |
| 3.38916373  | 11.82295561 | 7.18820573 |
| 8.37898836  | 11.91077470 | 7.19413477 |
| -0.29906576 | 6.73876759  | 6.26817360 |
| 4.64189876  | 6.85371678  | 6.36677356 |
| 1.73299289  | 1.62897145  | 6.17369134 |
| 6.72055082  | 1.60451768  | 6.16351734 |
| 2.19407108  | 8.36996282  | 5.68544070 |
| 7.14830019  | 8.29680843  | 5.61986352 |
| 9.19999274  | 3.13980681  | 5.29923938 |
| 4.20335182  | 3.14156574  | 5.29227793 |
| 4.68454006  | 10.81835435 | 4.26860288 |
| -0.32297873 | 10.80193775 | 4.27398974 |

|             |             |            |
|-------------|-------------|------------|
| 6.72481788  | 5.69840933  | 4.01944717 |
| 1.73859455  | 5.71779322  | 4.01949653 |
| 7.17889734  | 12.34801891 | 3.64315529 |
| 2.19208394  | 12.35135853 | 3.64176611 |
| 9.23066772  | 7.20468259  | 3.33721700 |
| 4.23924782  | 7.21040349  | 3.37473423 |
| 5.47292232  | 2.23055553  | 2.34193015 |
| 0.48302215  | 2.23055553  | 2.34193015 |
| 6.73540354  | 9.72874641  | 2.00704742 |
| 1.74550355  | 9.72874641  | 2.00704742 |
| 7.98876715  | 3.77819967  | 1.47019899 |
| 2.99886727  | 3.77819967  | 1.47019899 |
| 9.21347809  | 11.29064846 | 1.28800344 |
| 4.22357798  | 11.29064846 | 1.28800344 |
| 5.52626467  | 6.13002825  | 0.45987183 |
| 0.53636485  | 6.13002825  | 0.45987183 |
| 7.45328903  | 1.12937152  | 0.40848067 |
| 2.46338916  | 1.12937152  | 0.40848067 |
| 4.75647831  | 8.73880577  | 0.18583304 |
| -0.23342146 | 8.73880577  | 0.18583304 |
| 7.07755528  | 6.79765723  | 9.72562543 |
| 4.75926158  | 2.40850929  | 9.39586080 |
| 9.73295048  | 2.49584030  | 9.40788560 |
| 1.58784650  | 7.29409985  | 9.58367083 |
| 2.35506202  | 10.25285057 | 6.86394890 |
| -0.01228822 | 10.91974678 | 6.87939761 |
| 3.24943782  | 7.92661891  | 7.22370543 |
| 8.20112521  | 7.72337885  | 7.15902167 |
| 0.68811685  | 12.41969298 | 4.90105872 |
| 7.47637485  | 0.04142875  | 7.02848398 |
| 3.91077433  | 5.17151472  | 6.97531289 |
| 8.85440045  | 5.18358455  | 7.01912365 |
| 3.21509171  | 2.72629287  | 6.91938046 |
| 8.19900501  | 2.72045509  | 6.91950551 |
| 0.72167244  | 8.32678000  | 6.97739393 |
| 5.66052187  | 8.43617803  | 6.92367498 |
| 4.96525095  | 10.79719321 | 6.86152672 |
| 7.52295848  | 10.20972667 | 7.07190086 |
| 1.43070861  | 5.91852140  | 6.79591637 |
| 6.36065217  | 5.89092649  | 6.73249036 |
| 0.70585771  | 3.27665066  | 6.74052671 |
| 5.68262568  | 3.24374438  | 6.72991251 |
| 0.00678840  | 0.86052219  | 6.72233196 |
| 5.00034773  | 0.79980459  | 6.74407856 |

|             |             |            |
|-------------|-------------|------------|
| 3.26275852  | 11.77125518 | 5.16541363 |
| 8.23936628  | 11.76638929 | 5.17504562 |
| 8.87360653  | 9.20341694  | 5.11882183 |
| 3.90284568  | 9.20574188  | 5.00491883 |
| 7.51103453  | 4.22526572  | 5.03622804 |
| 2.52075605  | 4.24579231  | 5.03651051 |
| 8.19519270  | 6.76206526  | 4.91102515 |
| 3.19944422  | 6.78002575  | 4.99087844 |
| 5.68181958  | 12.41198270 | 4.91097803 |
| 2.52028664  | 0.07615802  | 7.03711751 |
| 3.23089536  | 1.47523066  | 4.84427159 |
| 8.21818801  | 1.47760542  | 4.83950851 |
| 1.39487118  | 9.86467433  | 4.69102593 |
| 6.39765726  | 9.88336956  | 4.76283946 |
| 5.01225451  | 4.85177125  | 4.71643983 |
| 0.02809377  | 4.87249351  | 4.76749994 |
| 0.74934599  | 7.32358974  | 4.70960305 |
| 5.70935374  | 7.29639115  | 4.72637180 |
| 5.74308821  | 2.17936404  | 4.51388486 |
| 0.75595214  | 2.18704280  | 4.52079472 |
| 8.92724419  | 3.16928101  | 3.13275409 |
| 3.93734455  | 3.16928101  | 3.13275409 |
| 9.65447807  | 0.51179242  | 2.92767382 |
| 4.66457796  | 0.51179242  | 2.92767382 |
| 8.19081593  | 10.75315189 | 2.92137337 |
| 3.20091629  | 10.75315189 | 2.92137337 |
| 7.52427816  | 8.16568470  | 2.89047265 |
| 2.53437829  | 8.16568470  | 2.89047265 |
| 6.46140337  | 3.88992119  | 2.81003308 |
| 1.47150326  | 3.88992119  | 2.81003308 |
| 8.23615360  | 5.59719324  | 2.75910425 |
| 3.24625349  | 5.59719324  | 2.75910425 |
| 5.72548342  | 11.29866314 | 2.69921899 |
| 0.73558354  | 11.29866314 | 2.69921899 |
| 5.02271366  | 8.84247589  | 2.64073300 |
| 0.03281343  | 8.84247589  | 2.64073300 |
| 7.16234589  | 1.15467191  | 2.58495903 |
| 2.17244577  | 1.15467191  | 2.58495903 |
| 5.69094276  | 6.28061676  | 2.47308970 |
| 0.70104283  | 6.28061676  | 2.47308970 |
| 4.72644854  | 4.52631235  | 0.98044425 |
| -0.26345146 | 4.52631235  | 0.98044425 |
| 8.98416233  | 2.08401227  | 0.94984233 |
| 3.99426270  | 2.08401227  | 0.94984233 |

|            |             |            |
|------------|-------------|------------|
| 7.49692297 | 12.16127491 | 0.88189071 |
| 2.50702286 | 12.16127491 | 0.88189071 |
| 8.92881203 | 7.14167833  | 0.77916235 |
| 3.93891239 | 7.14167833  | 0.77916235 |
| 8.23179626 | 9.65808487  | 0.74752367 |
| 3.24189639 | 9.65808487  | 0.74752367 |
| 6.50168800 | 2.71004343  | 0.73384589 |
| 1.51178777 | 2.71004343  | 0.73384589 |
| 5.78449345 | 0.24636792  | 0.66762453 |
| 0.79459333 | 0.24636792  | 0.66762453 |
| 6.40908241 | 7.83185196  | 0.60482943 |
| 1.41918242 | 7.83185196  | 0.60482943 |
| 7.18588972 | 5.31081581  | 0.60368013 |
| 2.19598985 | 5.31081581  | 0.60368013 |
| 5.68450737 | 10.28863907 | 0.50651002 |
| 0.69460732 | 10.28863907 | 0.50651002 |

# H+CH<sub>3</sub> cv

1.000000000000

|             |             |             |    |
|-------------|-------------|-------------|----|
| 9.97980000  | 0.00000000  | 0.00000000  |    |
| -0.76395804 | 12.66177393 | 0.00000000  |    |
| 0.00000004  | 0.00000004  | 19.64040000 |    |
| H           | C           | O           | Fe |
| 4           | 40          | 4           | 80 |

Cart

|             |             |            |
|-------------|-------------|------------|
| 4.03162849  | 7.39796891  | 9.51673514 |
| 5.46211026  | 8.19913887  | 8.97860826 |
| 4.05450131  | 9.19118922  | 9.38244833 |
| 5.99643991  | 10.02559102 | 7.82145650 |
| 4.33868587  | 8.24969402  | 8.89751682 |
| 4.60063221  | 2.57318114  | 8.22459220 |
| 9.60327495  | 2.60940878  | 8.22638629 |
| 1.73721881  | 7.53585069  | 8.45613592 |
| 7.68188356  | 6.98143653  | 8.72185977 |
| 9.17953853  | 9.26064837  | 7.35790306 |
| 2.20925098  | 4.24006294  | 7.20669214 |
| 7.17553409  | 4.24287996  | 7.16732583 |
| 3.45651647  | 11.78668072 | 7.16566321 |
| 8.40320542  | 11.89266095 | 7.19393762 |
| -0.30267804 | 6.72109221  | 6.26535959 |
| 4.63613697  | 6.81896179  | 6.36079330 |
| 1.74102808  | 1.59357350  | 6.17618825 |
| 6.72207557  | 1.59439220  | 6.15580948 |

|             |             |            |
|-------------|-------------|------------|
| 2.20603400  | 8.36267472  | 5.67901336 |
| 7.11272322  | 8.29017975  | 5.71337301 |
| 9.20263992  | 3.14222985  | 5.29921550 |
| 4.20327818  | 3.14056894  | 5.29943640 |
| 4.69557650  | 10.83017205 | 4.30835301 |
| -0.32185398 | 10.78455181 | 4.28014960 |
| 6.72379217  | 5.70495507  | 4.02303298 |
| 1.73640939  | 5.70984181  | 4.01910935 |
| 7.19218557  | 12.34951580 | 3.63343060 |
| 2.18421855  | 12.35094972 | 3.63065403 |
| 9.22841783  | 7.20439618  | 3.34486526 |
| 4.23688024  | 7.21212667  | 3.36787370 |
| 5.47292232  | 2.23055553  | 2.34193015 |
| 0.48302215  | 2.23055553  | 2.34193015 |
| 6.73540354  | 9.72874641  | 2.00704742 |
| 1.74550355  | 9.72874641  | 2.00704742 |
| 7.98876715  | 3.77819967  | 1.47019899 |
| 2.99886727  | 3.77819967  | 1.47019899 |
| 9.21347809  | 11.29064846 | 1.28800344 |
| 4.22357798  | 11.29064846 | 1.28800344 |
| 5.52626467  | 6.13002825  | 0.45987183 |
| 0.53636485  | 6.13002825  | 0.45987183 |
| 7.45328903  | 1.12937152  | 0.40848067 |
| 2.46338916  | 1.12937152  | 0.40848067 |
| 4.75647831  | 8.73880577  | 0.18583304 |
| -0.23342146 | 8.73880577  | 0.18583304 |
| 7.35595312  | 6.61760732  | 9.78883801 |
| 4.75532029  | 2.42138441  | 9.39965250 |
| 9.72939131  | 2.47071585  | 9.40561369 |
| 1.42360478  | 7.27660780  | 9.57845267 |
| 2.46400788  | 10.16886479 | 6.93528598 |
| 0.00605477  | 10.89397629 | 6.86482626 |
| 3.18080212  | 7.75833356  | 7.22909015 |
| 8.22231900  | 7.69443042  | 7.17873192 |
| 0.68336342  | 12.41465569 | 4.89852256 |
| 7.51013789  | 0.05595600  | 7.03141131 |
| 3.89218800  | 5.14703848  | 6.96712909 |
| 8.85285655  | 5.17174856  | 7.02995142 |
| 3.21128955  | 2.70298558  | 6.92043264 |
| 8.19874336  | 2.71163392  | 6.91935278 |
| 0.72223846  | 8.31278987  | 6.95054852 |
| 5.59630711  | 8.44770627  | 7.01904946 |
| 5.04636283  | 10.90166388 | 6.65717436 |
| 7.52622903  | 10.21045304 | 7.10381513 |

|            |             |            |
|------------|-------------|------------|
| 1.41553772 | 5.88035373  | 6.77557115 |
| 6.36114002 | 5.88721931  | 6.73366614 |
| 0.70517370 | 3.25495943  | 6.73945193 |
| 5.68315925 | 3.23791665  | 6.73222098 |
| 0.02258207 | 0.84563676  | 6.73231980 |
| 4.99782881 | 0.81104597  | 6.72252626 |
| 3.24100555 | 11.77384660 | 5.15377135 |
| 8.23112609 | 11.74987876 | 5.17713048 |
| 8.85575691 | 9.19357285  | 5.13799966 |
| 3.90804124 | 9.19022278  | 5.01582003 |
| 7.51040791 | 4.22467770  | 5.03779040 |
| 2.51778234 | 4.23294252  | 5.03431035 |
| 8.17859653 | 6.76522166  | 4.91893435 |
| 3.19349576 | 6.77104210  | 4.95571990 |
| 5.68535342 | 12.45823655 | 4.86220253 |
| 2.55535030 | 0.02771048  | 7.02754580 |
| 3.23003406 | 1.47571577  | 4.83916676 |
| 8.23782201 | 1.47571958  | 4.84306452 |
| 1.39909186 | 9.86422281  | 4.71972615 |
| 6.41394493 | 9.84203275  | 4.72365881 |
| 5.01574303 | 4.85448552  | 4.72391536 |
| 0.02037449 | 4.87138465  | 4.76487772 |
| 0.74007684 | 7.32067697  | 4.70417608 |
| 5.70391967 | 7.30793552  | 4.75008964 |
| 5.74540728 | 2.19277728  | 4.51015570 |
| 0.75962705 | 2.18283725  | 4.52057393 |
| 8.92724419 | 3.16928101  | 3.13275409 |
| 3.93734455 | 3.16928101  | 3.13275409 |
| 9.65447807 | 0.51179242  | 2.92767382 |
| 4.66457796 | 0.51179242  | 2.92767382 |
| 8.19081593 | 10.75315189 | 2.92137337 |
| 3.20091629 | 10.75315189 | 2.92137337 |
| 7.52427816 | 8.16568470  | 2.89047265 |
| 2.53437829 | 8.16568470  | 2.89047265 |
| 6.46140337 | 3.88992119  | 2.81003308 |
| 1.47150326 | 3.88992119  | 2.81003308 |
| 8.23615360 | 5.59719324  | 2.75910425 |
| 3.24625349 | 5.59719324  | 2.75910425 |
| 5.72548342 | 11.29866314 | 2.69921899 |
| 0.73558354 | 11.29866314 | 2.69921899 |
| 5.02271366 | 8.84247589  | 2.64073300 |
| 0.03281343 | 8.84247589  | 2.64073300 |
| 7.16234589 | 1.15467191  | 2.58495903 |
| 2.17244577 | 1.15467191  | 2.58495903 |

|             |             |            |
|-------------|-------------|------------|
| 5.69094276  | 6.28061676  | 2.47308970 |
| 0.70104283  | 6.28061676  | 2.47308970 |
| 4.72644854  | 4.52631235  | 0.98044425 |
| -0.26345146 | 4.52631235  | 0.98044425 |
| 8.98416233  | 2.08401227  | 0.94984233 |
| 3.99426270  | 2.08401227  | 0.94984233 |
| 7.49692297  | 12.16127491 | 0.88189071 |
| 2.50702286  | 12.16127491 | 0.88189071 |
| 8.92881203  | 7.14167833  | 0.77916235 |
| 3.93891239  | 7.14167833  | 0.77916235 |
| 8.23179626  | 9.65808487  | 0.74752367 |
| 3.24189639  | 9.65808487  | 0.74752367 |
| 6.50168800  | 2.71004343  | 0.73384589 |
| 1.51178777  | 2.71004343  | 0.73384589 |
| 5.78449345  | 0.24636792  | 0.66762453 |
| 0.79459333  | 0.24636792  | 0.66762453 |
| 6.40908241  | 7.83185196  | 0.60482943 |
| 1.41918242  | 7.83185196  | 0.60482943 |
| 7.18588972  | 5.31081581  | 0.60368013 |
| 2.19598985  | 5.31081581  | 0.60368013 |
| 5.68450737  | 10.28863907 | 0.50651002 |
| 0.69460732  | 10.28863907 | 0.50651002 |

# TS for  $H+CH_3 \text{ cv} \rightarrow CH_4(g)$

1.000000000000

|             |             |             |    |
|-------------|-------------|-------------|----|
| 9.97980000  | 0.00000000  | 0.00000000  |    |
| -0.76395804 | 12.66177393 | 0.00000000  |    |
| 0.00000004  | 0.00000004  | 19.64040000 |    |
| H           | C           | O           | Fe |
| 4           | 40          | 4           | 80 |

Cart

|            |            |            |
|------------|------------|------------|
| 4.30975048 | 7.85896189 | 9.02215812 |
| 5.74073114 | 8.59940962 | 9.72546605 |
| 4.32315898 | 9.62252273 | 9.33564404 |
| 5.69763592 | 9.67091321 | 8.06604140 |
| 4.93666552 | 8.77977208 | 8.99720565 |
| 4.59276800 | 2.54550504 | 8.22349733 |
| 9.58950465 | 2.58820739 | 8.22692522 |
| 1.70364226 | 7.90873378 | 8.49863763 |
| 7.67767345 | 6.97758464 | 8.70820288 |
| 9.17204295 | 9.27104333 | 7.36442780 |
| 2.20967852 | 4.24664156 | 7.20800722 |
| 7.17376329 | 4.24496891 | 7.16606153 |

|             |             |            |
|-------------|-------------|------------|
| 3.43379090  | 11.79353972 | 7.17556346 |
| 8.38322310  | 11.89696496 | 7.20604174 |
| -0.29998698 | 6.73314577  | 6.27345880 |
| 4.65546066  | 6.84950389  | 6.40692692 |
| 1.73269276  | 1.59987588  | 6.17652852 |
| 6.71278205  | 1.60103824  | 6.15507936 |
| 2.18236804  | 8.34583454  | 5.65085549 |
| 7.12037882  | 8.27476015  | 5.70493824 |
| 9.20002705  | 3.13743089  | 5.30153677 |
| 4.20167066  | 3.13400271  | 5.29960067 |
| 4.68787582  | 10.82426983 | 4.29748697 |
| -0.33057127 | 10.79051215 | 4.27523115 |
| 6.72184586  | 5.70241752  | 4.02437213 |
| 1.73425433  | 5.70065238  | 4.02089651 |
| 7.18762363  | 12.34911149 | 3.63431224 |
| 2.18025863  | 12.35068814 | 3.63233913 |
| 9.22759930  | 7.20472348  | 3.34428955 |
| 4.24194350  | 7.20975064  | 3.37879978 |
| 5.47292232  | 2.23055553  | 2.34193015 |
| 0.48302215  | 2.23055553  | 2.34193015 |
| 6.73540354  | 9.72874641  | 2.00704742 |
| 1.74550355  | 9.72874641  | 2.00704742 |
| 7.98876715  | 3.77819967  | 1.47019899 |
| 2.99886727  | 3.77819967  | 1.47019899 |
| 9.21347809  | 11.29064846 | 1.28800344 |
| 4.22357798  | 11.29064846 | 1.28800344 |
| 5.52626467  | 6.13002825  | 0.45987183 |
| 0.53636485  | 6.13002825  | 0.45987183 |
| 7.45328903  | 1.12937152  | 0.40848067 |
| 2.46338916  | 1.12937152  | 0.40848067 |
| 4.75647831  | 8.73880577  | 0.18583304 |
| -0.23342146 | 8.73880577  | 0.18583304 |
| 7.35432483  | 6.61746258  | 9.77798654 |
| 4.75549645  | 2.38498519  | 9.39697758 |
| 9.73008569  | 2.42952778  | 9.40277939 |
| 1.67146358  | 7.83092091  | 9.68884570 |
| 2.42808946  | 10.20314158 | 6.90318646 |
| -0.01033572 | 10.91038088 | 6.88056266 |
| 3.18585875  | 7.82737922  | 7.18820132 |
| 8.23474542  | 7.70102500  | 7.17616322 |
| 0.67417318  | 12.41265246 | 4.90168202 |
| 7.49535662  | 0.06194916  | 7.03151913 |
| 3.88885778  | 5.16860414  | 6.96242200 |
| 8.85631175  | 5.17181214  | 7.02811916 |



|            |             |            |
|------------|-------------|------------|
| 3.20906000 | 2.70704466  | 6.92273059 |
| 8.19534630 | 2.71140257  | 6.92082457 |
| 0.72647095 | 8.34234712  | 6.95434443 |
| 5.61987631 | 8.52027755  | 6.93465546 |
| 5.02959808 | 10.90283667 | 6.67522977 |
| 7.50846986 | 10.20627654 | 7.10074767 |
| 1.42177077 | 5.87949005  | 6.74945993 |
| 6.36185752 | 5.89574606  | 6.75016983 |
| 0.70156960 | 3.25352063  | 6.74300637 |
| 5.67923403 | 3.23731409  | 6.73431428 |
| 0.01199388 | 0.84375481  | 6.73527117 |
| 4.99223772 | 0.80694193  | 6.73263962 |
| 3.23515032 | 11.77190134 | 5.15285919 |
| 8.22303371 | 11.75166621 | 5.18165808 |
| 8.86228072 | 9.19212314  | 5.13302526 |
| 3.89529132 | 9.19234353  | 5.01031906 |
| 7.50596695 | 4.22216145  | 5.04131307 |
| 2.51777331 | 4.22399259  | 5.03526011 |
| 8.18135311 | 6.76012742  | 4.91947530 |
| 3.19792526 | 6.75587071  | 4.97489030 |
| 5.67861603 | 12.44771168 | 4.86755504 |
| 2.53990824 | 0.04521791  | 7.03709927 |
| 3.22256937 | 1.47317785  | 4.84087106 |
| 8.22805242 | 1.47607498  | 4.84250441 |
| 1.38594516 | 9.87167826  | 4.71231010 |
| 6.40446739 | 9.84343580  | 4.73578054 |
| 5.01255154 | 4.84302683  | 4.71695722 |
| 0.01806106 | 4.86161033  | 4.75601540 |
| 0.73642667 | 7.30359915  | 4.70301121 |
| 5.69703650 | 7.28852262  | 4.75691609 |
| 5.74053349 | 2.18676354  | 4.51103844 |
| 0.75629910 | 2.18286131  | 4.52039068 |
| 8.92724419 | 3.16928101  | 3.13275409 |
| 3.93734455 | 3.16928101  | 3.13275409 |
| 9.65447807 | 0.51179242  | 2.92767382 |
| 4.66457796 | 0.51179242  | 2.92767382 |
| 8.19081593 | 10.75315189 | 2.92137337 |
| 3.20091629 | 10.75315189 | 2.92137337 |
| 7.52427816 | 8.16568470  | 2.89047265 |
| 2.53437829 | 8.16568470  | 2.89047265 |
| 6.46140337 | 3.88992119  | 2.81003308 |
| 1.47150326 | 3.88992119  | 2.81003308 |
| 8.23615360 | 5.59719324  | 2.75910425 |
| 3.24625349 | 5.59719324  | 2.75910425 |

|             |             |            |
|-------------|-------------|------------|
| 5.72548342  | 11.29866314 | 2.69921899 |
| 0.73558354  | 11.29866314 | 2.69921899 |
| 5.02271366  | 8.84247589  | 2.64073300 |
| 0.03281343  | 8.84247589  | 2.64073300 |
| 7.16234589  | 1.15467191  | 2.58495903 |
| 2.17244577  | 1.15467191  | 2.58495903 |
| 5.69094276  | 6.28061676  | 2.47308970 |
| 0.70104283  | 6.28061676  | 2.47308970 |
| 4.72644854  | 4.52631235  | 0.98044425 |
| -0.26345146 | 4.52631235  | 0.98044425 |
| 8.98416233  | 2.08401227  | 0.94984233 |
| 3.99426270  | 2.08401227  | 0.94984233 |
| 7.49692297  | 12.16127491 | 0.88189071 |
| 2.50702286  | 12.16127491 | 0.88189071 |
| 8.92881203  | 7.14167833  | 0.77916235 |
| 3.93891239  | 7.14167833  | 0.77916235 |
| 8.23179626  | 9.65808487  | 0.74752367 |
| 3.24189639  | 9.65808487  | 0.74752367 |
| 6.50168800  | 2.71004343  | 0.73384589 |
| 1.51178777  | 2.71004343  | 0.73384589 |
| 5.78449345  | 0.24636792  | 0.66762453 |
| 0.79459333  | 0.24636792  | 0.66762453 |
| 6.40908241  | 7.83185196  | 0.60482943 |
| 1.41918242  | 7.83185196  | 0.60482943 |
| 7.18588972  | 5.31081581  | 0.60368013 |
| 2.19598985  | 5.31081581  | 0.60368013 |
| 5.68450737  | 10.28863907 | 0.50651002 |
| 0.69460732  | 10.28863907 | 0.50651002 |

#### 4. Interface

# Fe<sub>5</sub>C<sub>2</sub>(100)//Fe<sub>2</sub>C(011)

1.000000000000

|            |            |             |
|------------|------------|-------------|
| 4.60093331 | 0.00000000 | 0.00000000  |
| 0.00027824 | 5.04220787 | 0.00000000  |
| 0.03925410 | 2.48268598 | 21.00283815 |

|    |    |
|----|----|
| C  | Fe |
| 16 | 36 |

Cart

|            |            |            |
|------------|------------|------------|
| 4.22491450 | 4.05994622 | 0.03578439 |
| 4.53244306 | 2.75794632 | 2.94010372 |
| 4.51106351 | 1.21182544 | 5.32247724 |
| 4.51240452 | 4.73756546 | 7.72460120 |
| 2.47889701 | 1.54108675 | 0.05831227 |

|            |            |             |
|------------|------------|-------------|
| 2.19162597 | 5.28114006 | 2.94291799  |
| 2.21274068 | 3.73228820 | 5.32255084  |
| 2.20979517 | 2.21684974 | 7.72472658  |
| 2.49888166 | 6.10488724 | 18.53396491 |
| 0.19338396 | 1.88745010 | 13.00799920 |
| 2.23060725 | 5.71007122 | 10.10438672 |
| 0.19523907 | 4.84483122 | 15.51964458 |
| 4.49027898 | 3.19047652 | 10.10630664 |
| 1.95438309 | 2.32448863 | 15.51688021 |
| 4.25801247 | 3.58479304 | 18.52905233 |
| 1.93946263 | 4.40688619 | 12.99178332 |
| 3.00267530 | 5.08988617 | 1.23041557  |
| 2.91855228 | 3.60792235 | 3.53245617  |
| 2.91020694 | 2.07512124 | 5.93803129  |
| 2.91596042 | 5.60619753 | 8.32549712  |
| 1.42470003 | 3.27113276 | 0.03205651  |
| 1.47820927 | 1.85481874 | 2.23972940  |
| 1.50679256 | 5.38515922 | 4.72186407  |
| 1.51235549 | 3.87410101 | 7.10916493  |
| 3.71780461 | 2.57378073 | 1.22853664  |
| 3.80621734 | 1.08653440 | 3.53231066  |
| 3.81352788 | 4.59627713 | 5.93729243  |
| 3.80589134 | 3.08517104 | 8.32668897  |
| 0.67799298 | 0.74962497 | 0.03500611  |
| 0.64456245 | 4.37649610 | 2.24803588  |
| 0.61654735 | 2.86400570 | 4.71993801  |
| 0.60900963 | 1.35304703 | 7.10973566  |
| 3.77723280 | 1.57209031 | 10.80027463 |
| 2.99855020 | 4.04023089 | 15.24745620 |
| 1.46344749 | 5.83825871 | 16.66334600 |
| 0.61592445 | 4.86234527 | 9.51467858  |
| 3.76432701 | 5.11335223 | 17.38536788 |
| 2.99354780 | 2.67644028 | 13.01435164 |
| 1.41856396 | 5.89975124 | 11.81680182 |
| 0.70372797 | 6.91133694 | 18.80913876 |
| 2.98889882 | 2.59092924 | 17.38694665 |
| 3.74032123 | 5.19778533 | 13.01273066 |
| 0.70317848 | 3.37482983 | 11.81824329 |
| 1.45511284 | 4.38886751 | 18.80173690 |
| 2.94350343 | 4.09364265 | 10.80631319 |
| 3.75019092 | 6.56067442 | 15.24170691 |
| 0.68806454 | 3.31599538 | 16.66419487 |
| 1.50367195 | 2.34110715 | 9.51457402  |
| 1.37065661 | 5.88289707 | 14.23867967 |

|            |            |             |
|------------|------------|-------------|
| 3.67842822 | 5.06539569 | 19.80891176 |
| 0.77609671 | 3.36415306 | 14.24056709 |
| 3.08386445 | 2.54749885 | 19.81164478 |

# Fe<sub>5</sub>C<sub>2</sub>(100)//Fe<sub>3</sub>C(010)

1.000000000000

|             |             |             |
|-------------|-------------|-------------|
| 4.50700941  | 0.00000000  | 0.00000000  |
| 0.00003648  | 5.00213582  | 0.00000000  |
| -0.00518574 | -1.57565321 | 24.84239252 |

|    |    |
|----|----|
| C  | Fe |
| 16 | 44 |

Cart

|            |             |             |
|------------|-------------|-------------|
| 1.69984310 | 0.72346702  | 1.22594793  |
| 3.95788478 | -0.05786225 | 6.93201873  |
| 1.70435792 | 3.66846824  | 3.81359488  |
| 3.95372395 | 2.89300996  | 9.51854858  |
| 3.39687762 | 1.16747157  | 3.80954674  |
| 1.13662994 | 0.39178735  | 9.52558295  |
| 3.39068876 | 3.22466282  | 1.21959280  |
| 1.14347346 | 2.44331020  | 6.93607418  |
| 3.92725246 | 2.89884342  | 16.12991076 |
| 3.93249722 | 2.88139341  | 22.84808816 |
| 1.68314019 | 4.17042410  | 12.74277485 |
| 1.67250778 | -0.83996519 | 19.45718637 |
| 3.38596228 | 1.66938346  | 12.75411056 |
| 3.37536756 | 1.66072340  | 19.45488426 |
| 1.12353350 | 0.39811109  | 16.13497902 |
| 1.12873710 | 0.38031948  | 22.83881232 |
| 2.92868468 | 4.66305686  | 4.97053203  |
| 2.17016765 | 2.09796059  | 9.36837457  |
| 0.66718604 | 3.88570479  | 10.67981703 |
| 4.42750986 | 2.87615732  | 3.62253103  |
| 2.92161510 | 4.73581321  | 0.06587344  |
| 2.17413589 | 0.73441241  | 7.12322913  |
| 0.67507751 | 3.94891811  | 5.77492117  |
| 4.42332982 | 1.51789225  | 1.37770580  |
| 2.16184111 | 2.23367157  | 0.06846051  |
| 2.92676565 | 3.23634870  | 7.12488007  |
| 4.42945835 | 1.44849740  | 5.77428180  |
| 0.66798443 | 4.01879274  | 1.37502082  |
| 2.17594984 | 2.16138690  | 4.97098734  |
| 2.92078669 | -0.40279838 | 9.37123531  |
| 4.41580035 | 1.38554079  | 10.67692543 |

|            |             |             |
|------------|-------------|-------------|
| 0.67311340 | 0.37444419  | 3.62092175  |
| 0.60768113 | 3.91870906  | 8.22967444  |
| 2.86081621 | 4.69644787  | 2.51597723  |
| 4.48925200 | 1.41603681  | 8.22831809  |
| 2.23594823 | 2.19680610  | 2.51736447  |
| 2.16124100 | 0.67589197  | 11.53078014 |
| 2.14618931 | 0.67021787  | 18.23914885 |
| 4.40012258 | 1.39032614  | 17.34974453 |
| 4.40972159 | 1.37053086  | 24.05882731 |
| 0.64771610 | 3.89598920  | 14.90973610 |
| 0.64522191 | -1.12054581 | 21.60849007 |
| 2.90234262 | 3.17407734  | 13.98226016 |
| 2.89847713 | 3.16299269  | 20.67985975 |
| 0.64719300 | 3.89029699  | 17.35057708 |
| 0.65955780 | -1.12836874 | 24.05698697 |
| 2.91695455 | 3.17451633  | 11.53310982 |
| 2.90053282 | 3.17142081  | 18.23913288 |
| 2.15848785 | 0.66989840  | 13.97999095 |
| 2.15206351 | 0.66271239  | 20.68139800 |
| 4.40767597 | 1.39327740  | 14.90739588 |
| 4.40925487 | 1.38302973  | 21.61010689 |
| 2.92070357 | -0.39682312 | 16.11302377 |
| 2.93069627 | -0.40994819 | 22.79815969 |
| 0.68086707 | 2.45968991  | 12.79117424 |
| 0.66514697 | 2.45578686  | 19.47731566 |
| 4.38814218 | -0.04117990 | 12.78822664 |
| 4.38257058 | -0.04499446 | 19.47821345 |
| 2.13004011 | 2.10406680  | 16.11126928 |
| 2.13069155 | 2.09112280  | 22.80046966 |

# Fe<sub>5</sub>C<sub>2</sub>(100)//Fe<sub>7</sub>C<sub>3</sub>(010)

1.000000000000

|             |             |             |
|-------------|-------------|-------------|
| 4.53060611  | 0.00000000  | 0.00000000  |
| -0.00003921 | 4.97248625  | 0.00000000  |
| 0.00836638  | -1.55175089 | 27.70370231 |

|    |    |
|----|----|
| C  | Fe |
| 20 | 48 |

Cart

|            |            |             |
|------------|------------|-------------|
| 2.79300511 | 2.76254185 | 14.02466396 |
| 0.52020137 | 4.01740021 | 0.83412800  |
| 2.23430734 | 1.53236283 | 5.90288929  |
| 4.49899538 | 0.27397207 | 8.95550529  |
| 2.22921480 | 1.53138471 | 0.83364295  |

|            |             |             |
|------------|-------------|-------------|
| 4.50222671 | 0.27637445  | 14.02370577 |
| 2.78920289 | 2.76037148  | 8.95584419  |
| 0.52427488 | 4.01881471  | 5.90310483  |
| 2.81416472 | -0.15510205 | 11.48823814 |
| 0.54599953 | 1.96159997  | 3.37405645  |
| 2.20865996 | 4.44786920  | 3.36978968  |
| 4.47717256 | 2.33117386  | 11.48543277 |
| 0.53081318 | -0.94542609 | 17.11817506 |
| 2.79795462 | 3.24983710  | 22.85063300 |
| 0.53139955 | 1.98283822  | 19.71032161 |
| 2.79703049 | 1.20335050  | 25.44269502 |
| 2.23541685 | -0.50348308 | 19.70921868 |
| 4.50120456 | -1.28285830 | 25.44319421 |
| 2.23461711 | 1.54091542  | 17.11827608 |
| 4.50183662 | 0.76353154  | 22.85098366 |
| 4.02690821 | 3.73994565  | 7.80788858  |
| 3.27310742 | 4.81086289  | 1.07520161  |
| 1.08230753 | 0.51215472  | 2.13495548  |
| 1.76174141 | 3.03900697  | 7.05033655  |
| 1.01527788 | 1.96927920  | 13.78246089 |
| 3.35411663 | 1.29499105  | 12.72351443 |
| 1.76726182 | 1.48603675  | 27.39264747 |
| 1.74519230 | 4.45372597  | 9.22144398  |
| 3.93640307 | 3.77973018  | 10.25585207 |
| 4.03210477 | 3.74300437  | 15.16869428 |
| 4.01072786 | 2.32568214  | 5.63542354  |
| 1.67133672 | 2.99964981  | 4.60220587  |
| 0.99621455 | 0.55305045  | 7.05046168  |
| 1.74905251 | -0.51719331 | 13.78161226 |
| 3.93999422 | 3.78087772  | 12.72318743 |
| 3.26156524 | 1.25395819  | 7.80797361  |
| 4.00723910 | 2.32432328  | 1.07392955  |
| 1.66800403 | 2.99801842  | 2.13453035  |
| 3.26396140 | 1.25658148  | 15.16888635 |
| 3.27835828 | -0.16074634 | 5.63646641  |
| 1.08719721 | 0.51295192  | 4.60259338  |
| 0.99895152 | -1.00033717 | 27.39286073 |
| 1.01256449 | 1.96728641  | 9.22222783  |
| 3.35214867 | 1.29318344  | 10.25614127 |
| 1.72345144 | 3.12033065  | 11.50172160 |
| 3.98549415 | 3.65838624  | 3.35452648  |
| 3.29971638 | 1.17224276  | 3.35508114  |
| 1.03732279 | 0.63415099  | 11.50236573 |
| 1.76474443 | 2.96675456  | 20.87019416 |

|            |             |             |
|------------|-------------|-------------|
| 1.00610333 | 0.41802492  | 25.24787239 |
| 4.02925107 | 2.18608389  | 26.60502489 |
| 3.27076116 | 1.19714131  | 19.54368677 |
| 1.76329044 | 3.04350714  | 15.95573933 |
| 1.00676260 | -0.93699289 | 23.01701543 |
| 4.03023424 | 2.26606719  | 21.69035419 |
| 3.27031280 | -0.16003533 | 17.31327328 |
| 1.00226771 | 0.55720227  | 15.95582372 |
| 1.76231446 | 1.54938246  | 23.01707187 |
| 3.26909083 | -0.21995549 | 21.69045973 |
| 4.02577482 | 2.32619367  | 17.31299780 |
| 1.00361733 | 0.48044324  | 20.87033529 |
| 1.76170933 | 2.90441014  | 25.24822222 |
| 3.26783009 | -0.30033713 | 26.60485879 |
| 4.02646270 | 3.68329421  | 19.54358313 |
| 3.96077642 | 2.22692984  | 24.14629318 |
| 1.69411434 | 3.00471797  | 18.41447654 |
| 3.33842062 | -0.25933841 | 24.14622510 |
| 1.07146810 | 0.51858300  | 18.41457025 |

# Fe<sub>3</sub>C(010)//Fe<sub>2</sub>C(011)

1.000000000000

|             |            |             |
|-------------|------------|-------------|
| 4.57444910  | 0.00000000 | 0.00000000  |
| -0.00006049 | 5.08101721 | 0.00000000  |
| 0.00028594  | 1.08187725 | 34.27178684 |

|    |    |
|----|----|
| C  | Fe |
| 24 | 60 |

Cart

|            |            |             |
|------------|------------|-------------|
| 3.10176062 | 4.88758811 | 0.30632832  |
| 3.09169497 | 3.33452696 | 2.68979301  |
| 3.09309712 | 1.80579502 | 5.08904300  |
| 3.09337850 | 0.27606896 | 7.48719231  |
| 3.09339896 | 3.82762543 | 9.88645299  |
| 3.08111133 | 2.27388213 | 12.27053873 |
| 0.79494016 | 2.34836641 | 0.30812479  |
| 0.80752243 | 0.79372009 | 2.69011395  |
| 0.80669666 | 4.34625709 | 5.08919688  |
| 0.80535865 | 2.81653968 | 7.48728726  |
| 0.80320167 | 1.28677424 | 9.88662576  |
| 0.81277861 | 4.81553565 | 12.27209587 |
| 1.04453371 | 4.77099574 | 18.44777847 |
| 1.02839460 | 4.75857237 | 25.07293671 |
| 1.05770346 | 4.74903009 | 31.61802827 |

|            |            |             |
|------------|------------|-------------|
| 3.34480596 | 0.95802488 | 15.23550244 |
| 3.31629259 | 0.94621009 | 21.78481067 |
| 3.33123727 | 0.93580133 | 28.40901801 |
| 0.53585667 | 3.49927439 | 15.24554112 |
| 0.51185720 | 3.48595402 | 21.79399005 |
| 0.52527078 | 3.47626442 | 28.39562626 |
| 2.81244829 | 2.23041356 | 18.46035549 |
| 2.79862767 | 2.21886607 | 25.06461677 |
| 2.82457816 | 2.20766556 | 31.60714087 |
| 1.50531517 | 0.67048416 | 0.90008143  |
| 1.49936787 | 4.20922948 | 3.30326000  |
| 1.49970344 | 2.68063400 | 5.69939949  |
| 1.49935052 | 1.15054958 | 8.09739619  |
| 1.50146010 | 4.70407940 | 10.49008782 |
| 1.53244778 | 3.18678911 | 12.93775547 |
| 0.07543588 | 5.05793200 | 33.90751710 |
| 0.10889085 | 2.45779777 | 2.08877397  |
| 0.11239372 | 0.93119571 | 4.47912349  |
| 0.11226558 | 4.48216410 | 6.87708525  |
| 0.11158473 | 2.95262281 | 9.27311302  |
| 0.10384187 | 1.41104480 | 11.67706664 |
| 2.39262614 | 3.21066394 | 0.90013824  |
| 2.40004948 | 1.66868514 | 3.30306096  |
| 2.39988077 | 5.22120159 | 5.69919887  |
| 2.39888696 | 3.69115191 | 8.09722771  |
| 2.39477830 | 2.16357380 | 10.48873844 |
| 2.36085003 | 0.64642672 | 12.94244657 |
| 3.82113525 | 2.51758072 | 33.91260328 |
| 3.79006565 | 4.99825971 | 2.08727575  |
| 3.78726070 | 3.47172442 | 4.47903873  |
| 3.78666158 | 1.94167404 | 6.87713111  |
| 3.78546713 | 0.41206924 | 9.27313944  |
| 3.79123076 | 3.95125786 | 11.67720070 |
| 3.86948624 | 2.46279498 | 14.00197102 |
| 3.82360921 | 2.48390559 | 20.57695054 |
| 3.82943976 | 2.46732904 | 27.18660403 |
| 1.54318058 | 3.23878927 | 19.66961076 |
| 1.53516643 | 3.22130642 | 26.28048500 |
| 1.58385759 | 3.24294466 | 32.84946094 |
| 2.31839579 | 0.69951159 | 17.24721849 |
| 2.29630651 | 5.76523284 | 23.86209454 |
| 2.32341023 | 5.75226453 | 30.43967560 |
| 0.03526061 | 5.03571776 | 16.41335191 |
| 0.00932807 | 5.02036791 | 22.99597121 |



|            |            |             |
|------------|------------|-------------|
| 0.03183707 | 5.00792175 | 29.60781010 |
| 2.30310499 | 0.69451306 | 19.67352587 |
| 2.29936904 | 5.76490568 | 26.27726661 |
| 2.30824383 | 5.78674875 | 32.84867731 |
| 0.01991382 | 5.00018070 | 14.00281204 |
| 0.01247915 | 5.02116503 | 20.58006003 |
| 0.01542727 | 5.01182306 | 27.18270328 |
| 3.83777766 | 2.49218444 | 16.41087994 |
| 3.81302563 | 2.47823117 | 22.99498949 |
| 3.83498688 | 2.47068917 | 29.61084490 |
| 1.54819924 | 3.23694360 | 17.24425986 |
| 1.52566898 | 3.22609086 | 23.86292425 |
| 1.55046551 | 3.21496943 | 30.44226859 |
| 0.04511727 | 1.41634207 | 18.49690337 |
| 0.02741382 | 1.40095599 | 25.08692411 |
| 0.05146900 | 1.40075974 | 31.72844854 |
| 2.33720259 | 4.30659950 | 15.12439654 |
| 2.31490558 | 4.30408355 | 21.77098782 |
| 2.33274418 | 4.28991829 | 28.35804397 |
| 1.54480713 | 1.76694401 | 15.12153614 |
| 1.51321016 | 1.76412305 | 21.76813940 |
| 1.52303162 | 1.74887651 | 28.36307943 |
| 3.81128718 | 3.95720930 | 18.49214034 |
| 3.79958671 | 3.94102847 | 25.08956957 |
| 3.83235806 | 3.94022924 | 31.73160726 |

# Fe<sub>3</sub>C(010)//Fe<sub>7</sub>C<sub>3</sub>(010)

1.000000000000

|             |             |             |
|-------------|-------------|-------------|
| 4.51844427  | 0.00000000  | 0.00000000  |
| 0.00022955  | 4.98500070  | 0.00000000  |
| -0.03779112 | -0.02877869 | 29.68525143 |

|    |    |
|----|----|
| C  | Fe |
| 20 | 52 |

Cart

|            |            |             |
|------------|------------|-------------|
| 2.66804548 | 4.35027547 | 14.21245342 |
| 0.43636401 | 0.63580666 | 1.02578563  |
| 2.11968036 | 3.12667459 | 6.09536412  |
| 4.37679431 | 1.86135217 | 9.14685633  |
| 2.13513379 | 3.12787964 | 1.03055278  |
| 4.36586438 | 1.85751331 | 14.21424305 |
| 2.67357577 | 4.35354965 | 9.14546147  |
| 0.41600580 | 0.63369108 | 6.09226967  |
| 2.69406940 | 1.42582602 | 11.66928993 |

|            |            |             |
|------------|------------|-------------|
| 0.45010311 | 3.56130254 | 3.55971697  |
| 2.10398800 | 1.06881688 | 3.57504090  |
| 4.34739041 | 3.91837642 | 11.67688251 |
| 2.66012266 | 4.34015648 | 20.80562264 |
| 2.65648785 | 4.32902926 | 27.51920554 |
| 0.40215100 | 0.62719192 | 17.40663492 |
| 0.39925231 | 0.61488935 | 24.12255616 |
| 2.11106986 | 3.11970162 | 17.40865420 |
| 2.10876985 | 3.10745363 | 24.12482145 |
| 4.36922673 | 1.84766902 | 20.80763045 |
| 4.36554726 | 1.83647669 | 27.52304114 |
| 3.14772300 | 2.84758902 | 7.99581970  |
| 3.17854898 | 1.43155354 | 1.23729697  |
| 0.98988852 | 2.10501725 | 2.32667081  |
| 0.88868251 | 2.13938127 | 7.24343352  |
| 0.89220812 | 3.55350256 | 14.00168135 |
| 3.22413971 | 2.87983875 | 12.91303356 |
| 1.63335686 | 4.60842019 | 29.57068746 |
| 1.63001257 | 1.06476423 | 9.42108227  |
| 3.81695305 | 0.38764663 | 10.44627617 |
| 3.89931854 | 0.34776344 | 15.35775629 |
| 3.89238075 | 3.92203501 | 5.82289084  |
| 1.56224714 | 4.59822544 | 4.79541505  |
| 1.64459663 | 4.63269438 | 7.24450700  |
| 1.62352589 | 1.06142879 | 14.00392442 |
| 3.81089503 | 0.38844366 | 12.91392021 |
| 3.90336874 | 0.35582394 | 7.99625035  |
| 3.91054027 | 3.92500325 | 1.24200395  |
| 1.57762357 | 4.59980827 | 2.32861825  |
| 3.13337933 | 2.84071200 | 15.35702020 |
| 3.16304943 | 1.43063672 | 5.81771253  |
| 0.97677225 | 2.10773789 | 4.79354465  |
| 0.86673637 | 2.11683880 | 29.56898229 |
| 0.90108998 | 3.55768108 | 9.41829239  |
| 3.23181929 | 2.88116275 | 10.44543134 |
| 1.60297482 | 4.71225229 | 11.71182165 |
| 3.87777128 | 0.27513522 | 3.53131465  |
| 3.19460338 | 2.76747759 | 3.52811649  |
| 0.92019236 | 2.21972984 | 11.71044766 |
| 0.87776409 | 2.13360085 | 16.18925390 |
| 0.87582908 | 2.12175407 | 22.90689598 |
| 3.13539892 | 2.83380008 | 22.02237023 |
| 3.13046327 | 2.82378409 | 28.73877540 |
| 3.8886799  | 0.34785335 | 19.58172459 |

|            |            |             |
|------------|------------|-------------|
| 3.88377061 | 0.34053642 | 26.28627543 |
| 1.62791828 | 4.61614197 | 18.64330206 |
| 1.62777300 | 4.60838502 | 25.34868138 |
| 3.89282714 | 0.34065842 | 22.02299039 |
| 3.88911435 | 0.32998899 | 28.73944734 |
| 1.63635213 | 4.62538238 | 16.18952701 |
| 1.63344673 | 4.61359415 | 22.90762197 |
| 0.88452323 | 2.12295648 | 18.64287616 |
| 0.87931954 | 2.11508351 | 25.34780488 |
| 3.14112976 | 2.83969408 | 19.58114066 |
| 3.14023582 | 2.83186964 | 26.28558552 |
| 1.64946481 | 1.05510669 | 20.77843103 |
| 1.65288857 | 1.05025609 | 27.46482787 |
| 3.91664737 | 3.90613355 | 17.46448433 |
| 3.90765609 | 3.89984225 | 24.15197223 |
| 3.11504458 | 1.41363038 | 17.46394977 |
| 3.11893672 | 1.40736850 | 24.15117757 |
| 0.86133046 | 3.54766499 | 20.77781565 |
| 0.85073681 | 3.54282529 | 27.46377725 |

# Fe<sub>7</sub>C<sub>3</sub>(010)// Fe<sub>2</sub>C(011)

1.000000000000

|             |            |             |
|-------------|------------|-------------|
| 4.60584827  | 0.00000000 | 0.00000000  |
| -0.00004018 | 5.03218859 | 0.00000000  |
| -0.00840895 | 1.05879511 | 30.60722138 |

|    |    |
|----|----|
| C  | Fe |
| 24 | 52 |

Cart

|            |            |             |
|------------|------------|-------------|
| 3.15217237 | 4.96541853 | 0.39674740  |
| 3.12117030 | 3.42765217 | 2.77782370  |
| 3.12191973 | 1.91516404 | 5.18050609  |
| 3.12380663 | 0.40160915 | 7.58272869  |
| 3.12507577 | 3.92003513 | 9.98513539  |
| 3.09365215 | 2.37983415 | 12.36415192 |
| 0.79091070 | 2.45037982 | 0.39822302  |
| 0.82163617 | 0.91131779 | 2.77785083  |
| 0.82062711 | 4.43123838 | 5.18047590  |
| 0.81919182 | 2.91769380 | 7.58274228  |
| 0.81868900 | 1.40357958 | 9.98525785  |
| 0.84986729 | 4.89750163 | 12.36629070 |
| 1.08367559 | 4.81145747 | 28.14531177 |
| 3.39267401 | 1.08093795 | 15.22163077 |
| 0.51340687 | 3.57615315 | 20.19947854 |

|             |            |             |
|-------------|------------|-------------|
| 2.81667182  | 2.31332905 | 23.17051735 |
| 0.53484955  | 3.59757248 | 15.24011262 |
| 2.83178450  | 2.29510976 | 28.13211453 |
| 1.05221773  | 4.83020283 | 23.17416501 |
| 3.35516047  | 1.05906167 | 20.19568272 |
| 1.08446785  | 1.87068765 | 25.65015161 |
| 3.38947601  | 4.02085701 | 17.71731088 |
| 0.50565379  | 1.50418366 | 17.73637290 |
| 2.80672745  | 4.38725986 | 25.63505699 |
| 1.52862550  | 0.78322351 | 0.98725032  |
| 1.51832932  | 4.28919631 | 3.39373534  |
| 1.51982250  | 2.77720731 | 5.79673939  |
| 1.51944926  | 1.26253897 | 8.19674207  |
| 1.52401271  | 4.78298495 | 10.59019740 |
| 1.55914965  | 3.28409872 | 13.09100889 |
| 0.07209548  | 5.12129771 | 30.27529848 |
| 0.11643632  | 2.56415303 | 2.17364992  |
| 0.12038406  | 1.05394203 | 4.56609038  |
| 0.11998236  | 4.57183762 | 6.96640299  |
| 0.12201130  | 3.05844930 | 9.36971206  |
| 0.11254794  | 1.53135489 | 11.77604619 |
| 2.41502041  | 3.29922902 | 0.98703869  |
| 2.42439212  | 1.77314029 | 3.39365155  |
| 2.42275878  | 0.26113282 | 5.79680669  |
| 2.42360082  | 3.77865857 | 8.19690068  |
| 2.41983889  | 2.26695365 | 10.58889037 |
| 2.38400394  | 0.76871757 | 13.09651201 |
| 3.85396049  | 2.60560751 | 30.27890028 |
| 3.82646543  | 5.08029272 | 2.17282629  |
| 3.82211587  | 3.57006782 | 4.56617484  |
| 3.82284622  | 2.05579018 | 6.96637243  |
| 3.82167212  | 0.54242152 | 9.36947874  |
| 3.83203398  | 4.04721886 | 11.77572811 |
| 1.54424346  | 3.30398331 | 22.02896929 |
| 1.59053934  | 1.87739682 | 15.31592153 |
| 3.97467096  | 2.55280622 | 16.48139713 |
| 3.84711332  | 2.58417551 | 21.34137747 |
| 3.88747876  | 4.01519999 | 28.05458136 |
| 1.66805530  | 3.33924214 | 26.88811296 |
| 0.02944326  | 5.08166322 | 14.07231458 |
| -0.00535646 | 1.50093713 | 23.51200837 |
| 2.22504053  | 5.85364928 | 24.44724901 |
| 2.32370084  | 5.84217678 | 29.29780450 |
| 2.29760023  | 4.38814986 | 19.85943022 |

|            |            |             |
|------------|------------|-------------|
| 4.52837992 | 5.06902493 | 18.92296466 |
| 0.01790444 | 5.10066948 | 21.34353116 |
| 0.02746651 | 1.49827021 | 28.05020158 |
| 2.23624479 | 5.85227088 | 26.88573397 |
| 2.32111404 | 0.78792831 | 22.02690467 |
| 2.33608490 | 4.39435127 | 15.32170255 |
| 4.54278883 | 5.07310329 | 16.48444164 |
| 1.60173013 | 3.32359717 | 29.29970970 |
| 1.57323221 | 1.87460049 | 19.85362099 |
| 3.95090075 | 2.55462747 | 18.92002526 |
| 3.91224277 | 2.56895264 | 14.06963499 |
| 3.87643514 | 4.01487259 | 23.51687948 |
| 1.64861023 | 3.33613339 | 24.44970164 |
| 4.59008272 | 5.19187292 | 25.77929197 |
| 2.28918588 | 0.70029164 | 17.59324580 |
| 1.60684379 | 3.21511831 | 17.58514312 |
| 3.90788967 | 2.67671310 | 25.78552454 |
